# Supplementary material for: Tendon and motor phenotypes in the Crtap-/- mouse model of recessive osteogenesis imperfecta
Source: eLife. 2021 May 26;10:e63488. doi: 10.7554/eLife.63488 (PMC8186905; doi:10.7554/eLife.63488)
Supplement: Figure 6—source data 1. — The Wald test was used to generate p-values and log2 fold changes. Genes with an adjusted p-value<0.05 and absolute log2 fold change >1 were called significantly differentially expressed genes. This is a full list of all differentially expressed genes ordered by adjusted p-value. [file elife-63488-fig6-data1.xlsx]

## Sheet: All Genes
Figure 6-source data 1. List of differentially expressed genes between 1-month wildtype and Crtap knockout Achilles tendons.
The Wald test was used to generate p-values and log2 fold changes. Genes with an adjusted p-value < 0.05 and absolute log2 fold change > 1
were called significantly differentially expressed genes.Genes in this table are ordered by adjusted p-value.
ID	Gene	baseMean	log2FoldChange	lfcSE	stat	pvalue	padj
ENSMUSG00000032431	Crtap	2671.22	-9.03005	0.297847	-30.3177	6.69746e-202	1.01105e-197
ENSMUSG00000020583	Matn3	872.908	3.22161	0.220709	14.5967	2.94898e-48	2.22589e-44
ENSMUSG00000030218	Mgp	9499.42	2.18827	0.150789	14.5121	1.01516e-47	5.10828e-44
ENSMUSG00000016995	Matn4	2348.37	2.09194	0.157724	13.2633	3.77703e-40	1.42545e-36
ENSMUSG00000042436	Mfap4	8955.54	2.04323	0.157099	13.006	1.13133e-38	3.41573e-35
ENSMUSG00000031297	Slc7a3	145.675	4.02588	0.328133	12.269	1.32809e-34	3.34147e-31
ENSMUSG00000059058	Tma7-ps	115.095	-5.09169	0.416093	-12.2369	1.97423e-34	4.25756e-31
ENSMUSG00000053141	Ptprt	342.137	3.12511	0.259151	12.059	1.73849e-33	3.28053e-30
ENSMUSG00000020953	Coch	589.098	-4.05605	0.356759	-11.3691	5.9568e-30	9.99155e-27
ENSMUSG00000048376	F2r	2042.71	1.54018	0.139377	11.0505	2.18075e-28	3.29206e-25
ENSMUSG00000024713	Pcsk5	996.616	1.47837	0.143491	10.3029	6.839e-25	9.3856e-22
ENSMUSG00000045246	Kcng4	308.026	-2.8078	0.280111	-10.0239	1.19672e-23	1.50548e-20
ENSMUSG00000097789	Gm2115	122.61	2.29461	0.232814	9.85596	6.45958e-23	7.50107e-20
ENSMUSG00000030562	Nox4	269.655	1.84619	0.191086	9.66154	4.39229e-22	4.73614e-19
ENSMUSG00000012017	Scarf2	5262.3	1.05914	0.113329	9.34568	9.1303e-21	9.18874e-18
ENSMUSG00000026193	Fn1	71232.6	1.27805	0.144192	8.8635	7.75376e-19	7.31567e-16
ENSMUSG00000020218	Wif1	9336.1	0.717294	0.0839947	8.53976	1.34501e-17	1.19437e-14
ENSMUSG00000031740	Mmp2	13426.6	1.26227	0.151105	8.35364	6.61932e-17	5.55141e-14
ENSMUSG00000013418	B4galnt2	41.9103	3.96375	0.486273	8.15129	3.60053e-16	2.86072e-13
ENSMUSG00000047343	Mettl21c	506.858	-2.09336	0.259507	-8.06666	7.22453e-16	5.45307e-13
ENSMUSG00000079105	C7	771.963	-2.44748	0.303901	-8.05353	8.04374e-16	5.7823e-13
ENSMUSG00000017002	Slpi	137.262	2.35747	0.298275	7.90368	2.70782e-15	1.85806e-12
ENSMUSG00000031253	Srpx2	1287.42	1.12301	0.147409	7.61833	2.5698e-14	1.61768e-11
ENSMUSG00000060572	Mfap2	1766.53	0.857724	0.112588	7.61823	2.57182e-14	1.61768e-11
ENSMUSG00000028036	Ptgfr	650.721	1.10805	0.146338	7.57184	3.67968e-14	2.22194e-11
ENSMUSG00000017007	Rbpjl	159.613	1.93735	0.260575	7.4349	1.04644e-13	6.07579e-11
ENSMUSG00000030513	Pcsk6	3205.55	0.775326	0.108313	7.15822	8.17319e-13	4.56972e-10
ENSMUSG00000026748	Plxdc2	4070.49	0.808457	0.113364	7.13153	9.92606e-13	5.35157e-10
ENSMUSG00000038539	Atf5	8760.43	0.757559	0.10664	7.10392	1.21266e-12	6.31251e-10
ENSMUSG00000025161	Slc16a3	1761.22	-1.76758	0.250513	-7.05587	1.71519e-12	8.63085e-10
ENSMUSG00000041193	Pla2g5	2234.44	-1.15339	0.163621	-7.04916	1.79999e-12	8.76537e-10
ENSMUSG00000027239	Mdk	270.877	1.61875	0.230264	7.02999	2.06549e-12	9.73274e-10
ENSMUSG00000037370	Enpp1	1530.42	0.793794	0.112982	7.02586	2.12759e-12	9.73274e-10
ENSMUSG00000022324	Matn2	7098.77	-0.969984	0.138397	-7.0087	2.40541e-12	1.068e-09
ENSMUSG00000021702	Thbs4	121173	1.19463	0.171254	6.9758	3.04136e-12	1.31178e-09
ENSMUSG00000039954	Stk32a	200.191	-1.8254	0.261983	-6.96764	3.22301e-12	1.35151e-09
ENSMUSG00000033491	Prss35	133.211	1.65555	0.240633	6.88	5.98533e-12	2.44201e-09
ENSMUSG00000024743	Syt7	493.13	0.970438	0.143936	6.74216	1.56046e-11	6.19914e-09
ENSMUSG00000036040	Adamtsl2	685.792	1.44471	0.215428	6.70621	1.99743e-11	7.73159e-09
ENSMUSG00000085272	Sbk3	91.1331	2.27368	0.339519	6.69676	2.13098e-11	8.04232e-09
ENSMUSG00000007279	Scube2	1003.44	1.27377	0.191099	6.66552	2.63721e-11	9.71009e-09
ENSMUSG00000076441	Ass1	289.136	1.1476	0.173438	6.61678	3.67111e-11	1.3195e-08
ENSMUSG00000061762	Tac1	74.2	2.62139	0.399478	6.56203	5.30794e-11	1.86346e-08
ENSMUSG00000031659	Adcy7	2998.94	0.986669	0.152539	6.46832	9.90985e-11	3.39998e-08
ENSMUSG00000002020	Ltbp2	916.142	1.4243	0.22034	6.46409	1.01907e-10	3.41864e-08
ENSMUSG00000024331	Dsc2	91.3273	1.87783	0.29071	6.45946	1.05075e-10	3.44829e-08
ENSMUSG00000029070	Mxra8	8079.01	0.999747	0.154968	6.45133	1.10875e-10	3.56122e-08
ENSMUSG00000042254	Cilp	9706.89	1.26203	0.197161	6.401	1.54358e-10	4.85456e-08
ENSMUSG00000031765	Mt1	730.959	0.897848	0.140841	6.37491	1.8307e-10	5.64005e-08
ENSMUSG00000036446	Lum	3532.7	1.07894	0.170474	6.32907	2.46642e-10	7.44663e-08
ENSMUSG00000035279	Ssc5d	13918.7	0.652951	0.103396	6.31503	2.70116e-10	7.99542e-08
ENSMUSG00000027408	Cpxm1	1695.54	1.22077	0.194883	6.26413	3.74906e-10	1.06784e-07
ENSMUSG00000037362	Nov	1553.04	1.2402	0.197962	6.26485	3.73191e-10	1.06784e-07
ENSMUSG00000024479	Mal2	34.1386	2.89831	0.46866	6.18424	6.24037e-10	1.74453e-07
ENSMUSG00000034488	Edil3	188.624	1.76055	0.285989	6.15599	7.46086e-10	2.0478e-07
ENSMUSG00000056515	Rab31	2328.85	0.681331	0.110777	6.1505	7.72404e-10	2.08218e-07
ENSMUSG00000021567	Nkd2	650.851	1.2443	0.202727	6.13781	8.36659e-10	2.21583e-07
ENSMUSG00000036528	Ppfibp2	615.108	0.834808	0.136337	6.12312	9.17606e-10	2.38831e-07
ENSMUSG00000033965	Slc16a2	773.379	0.731512	0.120271	6.08218	1.18559e-09	3.03351e-07
ENSMUSG00000020473	Aebp1	10573.6	0.957907	0.158182	6.05572	1.3979e-09	3.51711e-07
ENSMUSG00000024940	Ltbp3	7281.29	0.61625	0.102438	6.01584	1.78958e-09	4.42876e-07
ENSMUSG00000056328	Myh1	41819.8	-1.4383	0.240898	-5.97058	2.36412e-09	5.75625e-07
ENSMUSG00000007888	Crlf1	314.69	1.29952	0.218388	5.95054	2.67253e-09	6.4039e-07
ENSMUSG00000044211	Gm7887	28.7015	-3.49189	0.588113	-5.93745	2.89487e-09	6.82828e-07
ENSMUSG00000022025	Cnmd	70.4292	-2.33371	0.393986	-5.92334	3.15476e-09	7.32682e-07
ENSMUSG00000069662	Marcks	5283.64	0.68774	0.116702	5.8931	3.79007e-09	8.66891e-07
ENSMUSG00000025993	Slc40a1	270.873	0.96885	0.165215	5.86417	4.51395e-09	1.01705e-06
ENSMUSG00000052504	Epha3	445.849	0.999535	0.171401	5.83156	5.4912e-09	1.21905e-06
ENSMUSG00000074006	Omp	54.2044	-2.09664	0.359708	-5.82872	5.58555e-09	1.22202e-06
ENSMUSG00000020105	Lrig3	543.269	0.838582	0.14576	5.75316	8.75893e-09	1.88893e-06
ENSMUSG00000063415	Cyp26b1	518.496	-1.13713	0.198662	-5.72392	1.04095e-08	2.21326e-06
ENSMUSG00000041556	Fbxo2	253.994	-1.08824	0.190331	-5.71764	1.08014e-08	2.2647e-06
ENSMUSG00000032334	Loxl1	3766.82	0.867066	0.152037	5.703	1.17719e-08	2.40643e-06
ENSMUSG00000033676	Gabrb3	42.6781	2.25279	0.395042	5.70265	1.17962e-08	2.40643e-06
ENSMUSG00000000320	Alox12	570.499	-0.761477	0.133625	-5.69859	1.208e-08	2.43146e-06
ENSMUSG00000017493	Igfbp4	23698.4	0.936778	0.164566	5.69241	1.25257e-08	2.488e-06
ENSMUSG00000028111	Ctsk	11222.8	0.777685	0.136742	5.68723	1.2912e-08	2.53142e-06
ENSMUSG00000058441	Panx2	53.3921	2.38011	0.419084	5.67932	1.35227e-08	2.61717e-06
ENSMUSG00000046318	Ccbe1	186.842	1.38553	0.244236	5.6729	1.40397e-08	2.68282e-06
ENSMUSG00000064246	Chil1	131.774	2.29985	0.406289	5.66062	1.50828e-08	2.84612e-06
ENSMUSG00000058914	C1qtnf3	1681.93	1.63961	0.290287	5.64824	1.62102e-08	3.02109e-06
ENSMUSG00000037211	Spry1	980.194	0.698114	0.123694	5.64386	1.66277e-08	3.06111e-06
ENSMUSG00000079465	Col4a3	83.9171	-1.67682	0.29786	-5.62957	1.80664e-08	3.28591e-06
ENSMUSG00000028364	Tnc	10125.6	0.677307	0.120599	5.61617	1.95233e-08	3.50861e-06
ENSMUSG00000067001	Serpinb7	62.2016	-2.20113	0.395168	-5.57011	2.54575e-08	4.52125e-06
ENSMUSG00000031762	Mt2	335.085	1.10691	0.199088	5.55988	2.6996e-08	4.73874e-06
ENSMUSG00000032246	Calml4	95.8805	-1.60104	0.2884	-5.55145	2.83309e-08	4.9159e-06
ENSMUSG00000050447	Lypd6	118.136	1.17031	0.214016	5.4683	4.54369e-08	7.79449e-06
ENSMUSG00000018819	Lsp1	2593.06	0.724241	0.133092	5.44163	5.27939e-08	8.95479e-06
ENSMUSG00000102573	Gm7265	79.4822	-1.52451	0.280379	-5.43734	5.40827e-08	9.07148e-06
ENSMUSG00000044172	Ptx4	610.828	1.28561	0.23873	5.3852	7.23625e-08	1.20042e-05
ENSMUSG00000038400	Pmepa1	2524.68	0.905757	0.169045	5.35809	8.41077e-08	1.3801e-05
ENSMUSG00000059049	Frem1	107.73	1.32706	0.248071	5.34951	8.81922e-08	1.43156e-05
ENSMUSG00000020303	Stc2	307.937	1.43597	0.270602	5.30658	1.11699e-07	1.79383e-05
ENSMUSG00000022037	Clu	14695.3	-0.914492	0.173387	-5.27428	1.33276e-07	2.11783e-05
ENSMUSG00000036225	Kctd1	418.355	0.797703	0.151586	5.26237	1.42213e-07	2.2363e-05
ENSMUSG00000009876	Cox4i2	860.22	-1.51894	0.289391	-5.24873	1.53149e-07	2.38344e-05
ENSMUSG00000064115	Cadm2	174.333	-1.44161	0.275218	-5.23807	1.62268e-07	2.49959e-05
ENSMUSG00000056124	B4galt6	677.361	0.854856	0.163429	5.23073	1.68838e-07	2.57453e-05
ENSMUSG00000095407	Tmem200c	57.0519	1.76944	0.338616	5.22549	1.73692e-07	2.62206e-05
ENSMUSG00000000278	Scpep1	2030.12	0.611918	0.117556	5.20533	1.93654e-07	2.89446e-05
ENSMUSG00000024012	Mtch1	6407.19	0.597891	0.115282	5.18635	2.14454e-07	3.17392e-05
ENSMUSG00000028836	Slc30a2	112.957	-1.80733	0.350245	-5.16019	2.467e-07	3.58094e-05
ENSMUSG00000037977	6430571L13Rik	188.363	-1.84609	0.357715	-5.16079	2.45907e-07	3.58094e-05
ENSMUSG00000028539	Artn	58.9992	1.86099	0.361034	5.15461	2.54159e-07	3.65407e-05
ENSMUSG00000029304	Spp1	6508.91	1.3606	0.264297	5.14798	2.63303e-07	3.73205e-05
ENSMUSG00000040732	Erg	1373.78	0.693799	0.134794	5.14711	2.64526e-07	3.73205e-05
ENSMUSG00000042045	Sln	692.135	1.19866	0.234362	5.11457	3.14453e-07	4.39535e-05
ENSMUSG00000026958	Dpp7	258.941	0.926464	0.181561	5.10276	3.34742e-07	4.63602e-05
ENSMUSG00000020422	Tns3	2872.73	0.669737	0.131643	5.08754	3.6273e-07	4.93313e-05
ENSMUSG00000032291	Crabp1	566.439	0.984201	0.193411	5.08865	3.6062e-07	4.93313e-05
ENSMUSG00000044573	Acp1	450.323	-0.877269	0.172552	-5.08408	3.69413e-07	4.97916e-05
ENSMUSG00000059498	Fcgr3	782.4	-1.0589	0.209845	-5.04609	4.50945e-07	6.02431e-05
ENSMUSG00000031375	Bgn	47794.7	0.492597	0.098668	4.99247	5.96122e-07	7.89391e-05
ENSMUSG00000022483	Col2a1	4175.75	1.04105	0.208975	4.98172	6.30219e-07	8.27286e-05
ENSMUSG00000030498	Gas2	891.2	1.00859	0.20296	4.9694	6.71594e-07	8.73998e-05
ENSMUSG00000024769	Cdc42bpg	513.917	0.788231	0.159223	4.95047	7.40341e-07	9.5523e-05
ENSMUSG00000042834	Nrep	17102.5	-0.621464	0.125774	-4.94112	7.76749e-07	9.93712e-05
ENSMUSG00000027386	Fbln7	1046.92	1.09172	0.221811	4.92185	8.57301e-07	0.000108755
ENSMUSG00000027301	Oxt	35.3861	-1.88308	0.384308	-4.89991	9.58801e-07	0.000120617
ENSMUSG00000029223	Uchl1	504.294	1.23906	0.257143	4.81856	1.44595e-06	0.000178939
ENSMUSG00000050821	Fam131a	537.613	-0.998122	0.207142	-4.81854	1.44612e-06	0.000178939
ENSMUSG00000019831	Wasf1	412.709	0.761567	0.159859	4.76399	1.89804e-06	0.000231193
ENSMUSG00000027797	Dclk1	571.72	1.01355	0.212756	4.76388	1.89904e-06	0.000231193
ENSMUSG00000028631	Kcnq4	405.25	-0.783306	0.16451	-4.76143	1.92222e-06	0.000232143
ENSMUSG00000028164	Manba	587.457	0.890603	0.187259	4.75598	1.97483e-06	0.00023474
ENSMUSG00000039745	Htatip2	430.06	0.99669	0.209523	4.75696	1.96531e-06	0.00023474
ENSMUSG00000048065	Cyb5r2	282.242	0.90264	0.190084	4.74863	2.04796e-06	0.000241532
ENSMUSG00000027316	Gfra4	110.922	1.03393	0.21794	4.74413	2.09404e-06	0.000245051
ENSMUSG00000031673	Cdh11	1230.88	0.946663	0.20053	4.7208	2.3492e-06	0.000272796
ENSMUSG00000030433	Sbk2	527.13	1.667	0.353469	4.71612	2.40382e-06	0.000277008
ENSMUSG00000031825	Crispld2	10607	0.762296	0.162444	4.69268	2.6965e-06	0.000306783
ENSMUSG00000036242	3632451O06Rik	1063.41	-0.574618	0.122462	-4.6922	2.70284e-06	0.000306783
ENSMUSG00000025582	Nptx1	130.603	1.35119	0.28832	4.68643	2.78009e-06	0.000313196
ENSMUSG00000032502	Stac	174.374	1.18536	0.253683	4.67261	2.97398e-06	0.000332557
ENSMUSG00000031595	Pdgfrl	5187.11	0.570838	0.122346	4.66577	3.07461e-06	0.000341282
ENSMUSG00000009654	Oit3	341.916	-1.01476	0.218099	-4.65276	3.27527e-06	0.000350663
ENSMUSG00000021186	Fbln5	2013.49	0.79612	0.171073	4.65368	3.26059e-06	0.000350663
ENSMUSG00000032719	Sbspon	90.3104	-1.82415	0.391742	-4.65652	3.21599e-06	0.000350663
ENSMUSG00000039607	Rbms3	806.163	0.573178	0.123151	4.65428	3.25117e-06	0.000350663
ENSMUSG00000057967	Fgf18	265.196	0.902809	0.19394	4.6551	3.23826e-06	0.000350663
ENSMUSG00000071984	Fndc1	21356.4	0.853346	0.183527	4.64969	3.3243e-06	0.000353406
ENSMUSG00000079022	Col22a1	3719.48	0.947863	0.20396	4.64731	3.36297e-06	0.000355016
ENSMUSG00000001131	Timp1	1307.92	1.05251	0.227534	4.62571	3.73316e-06	0.000391359
ENSMUSG00000040945	Rcc2	1840.41	0.620014	0.134363	4.61446	3.94121e-06	0.00041032
ENSMUSG00000022425	Enpp2	1671.51	0.871308	0.189019	4.60963	4.03389e-06	0.000414959
ENSMUSG00000032498	Mlh1	133.448	1.10749	0.240275	4.60928	4.04073e-06	0.000414959
ENSMUSG00000042499	Hoxd11	141.999	0.921866	0.201116	4.58375	4.56719e-06	0.000465854
ENSMUSG00000078350	Smim1	187.364	-0.939433	0.205557	-4.57017	4.87319e-06	0.00049373
ENSMUSG00000033685	Ucp2	3041.75	1.16601	0.25535	4.56631	4.96388e-06	0.000499565
ENSMUSG00000004892	Bcan	149.496	-1.85367	0.406964	-4.55489	5.24131e-06	0.000520545
ENSMUSG00000072812	Ahnak2	1162.71	0.853293	0.187332	4.55498	5.23906e-06	0.000520545
ENSMUSG00000021508	Cxcl14	1469.2	0.853058	0.187474	4.55028	5.35742e-06	0.000521778
ENSMUSG00000025784	Clec3b	4972.7	-0.634637	0.13945	-4.55099	5.33931e-06	0.000521778
ENSMUSG00000033960	Jcad	2744.68	0.639441	0.140452	4.55272	5.29568e-06	0.000521778
ENSMUSG00000001768	Rin2	6184.61	0.978767	0.215418	4.54357	5.531e-06	0.000535231
ENSMUSG00000040653	Ppp1r14c	354.553	-1.56501	0.345128	-4.53458	5.77175e-06	0.00055497
ENSMUSG00000025232	Hexa	3104.83	0.657194	0.146565	4.48397	7.32678e-06	0.000697311
ENSMUSG00000079012	Serpina3m	84.915	-1.64011	0.365813	-4.48345	7.34449e-06	0.000697311
ENSMUSG00000026456	Cyb5r1	1300.58	0.615739	0.137524	4.47731	7.559e-06	0.000713192
ENSMUSG00000035745	Grin3b	44.8637	-1.85457	0.4148	-4.47101	7.78495e-06	0.000729948
ENSMUSG00000051048	P4ha3	259.246	1.16254	0.262133	4.43492	9.21054e-06	0.000858286
ENSMUSG00000036304	Zdhhc23	91.4016	-1.37823	0.311191	-4.42889	9.47208e-06	0.00086841
ENSMUSG00000044716	Dok7	298.552	-0.859968	0.194144	-4.42953	9.44388e-06	0.00086841
ENSMUSG00000066705	Fxyd6	8732.44	0.604294	0.136458	4.42844	9.49176e-06	0.00086841
ENSMUSG00000022952	Runx1	670.977	0.736142	0.166388	4.42424	9.67807e-06	0.000880122
ENSMUSG00000017466	Timp2	46037.4	0.580451	0.131469	4.41512	1.00952e-05	0.000912559
ENSMUSG00000028626	Col9a2	59.1479	1.44772	0.328323	4.40944	1.03639e-05	0.00093127
ENSMUSG00000044378	Slc15a5	14.2215	-4.39619	0.999574	-4.39806	1.09221e-05	0.00097562
ENSMUSG00000001870	Ltbp1	3206.86	0.549194	0.125248	4.38485	1.16068e-05	0.00103068
ENSMUSG00000025930	Msc	85.8244	1.75963	0.401589	4.38168	1.17768e-05	0.00103967
ENSMUSG00000019464	Ptger1	101.184	-0.981378	0.224695	-4.36759	1.25623e-05	0.00110205
ENSMUSG00000038319	Kcnh2	234.526	-1.18362	0.271206	-4.3643	1.27529e-05	0.00110205
ENSMUSG00000038412	Higd1a	1392.8	-0.737931	0.169097	-4.36394	1.27741e-05	0.00110205
ENSMUSG00000045045	Lrfn4	421.884	0.680775	0.156001	4.36392	1.27754e-05	0.00110205
ENSMUSG00000033420	Antxr1	7966.77	0.653083	0.14996	4.35506	1.33033e-05	0.00114106
ENSMUSG00000086233	Gm11816	84.0389	-1.06779	0.245305	-4.3529	1.34348e-05	0.00114583
ENSMUSG00000048489	8430408G22Rik	195.332	1.34943	0.310212	4.35002	1.36128e-05	0.00115449
ENSMUSG00000051041	Olfml1	840.89	0.583504	0.134183	4.34858	1.37021e-05	0.00115557
ENSMUSG00000024600	Slc27a6	197.768	0.854372	0.197048	4.33585	1.45197e-05	0.001217
ENSMUSG00000043289	Mei4	12.9088	4.17412	0.962941	4.33476	1.45917e-05	0.001217
ENSMUSG00000042745	Id1	1730.11	-0.757233	0.175514	-4.31438	1.60055e-05	0.00132758
ENSMUSG00000019806	Aig1	661.122	0.584003	0.135636	4.30565	1.66494e-05	0.00137344
ENSMUSG00000038453	Srcin1	258.927	-0.808372	0.188199	-4.29531	1.7445e-05	0.00143125
ENSMUSG00000063260	Syt10	19.29	2.84154	0.662094	4.29175	1.77269e-05	0.00144651
ENSMUSG00000020901	Pik3r5	173.222	1.03249	0.240646	4.29051	1.78263e-05	0.0014468
ENSMUSG00000029059	Fam213b	678.114	-0.99538	0.232069	-4.28916	1.79348e-05	0.00144782
ENSMUSG00000087410	2310065F04Rik	159.471	-2.1602	0.506565	-4.26441	2.0043e-05	0.00160941
ENSMUSG00000035258	Abi3bp	20655.8	0.680878	0.160123	4.25222	2.11663e-05	0.00169062
ENSMUSG00000031075	Ano1	590.092	-0.646865	0.152678	-4.2368	2.26725e-05	0.00180139
ENSMUSG00000022464	Slc38a4	302.529	-1.30281	0.308145	-4.22791	2.35873e-05	0.00186426
ENSMUSG00000035000	Dpp4	711.799	0.597675	0.141469	4.22478	2.39169e-05	0.00188047
ENSMUSG00000063229	Ldha	16167.8	-0.862574	0.204269	-4.22273	2.41365e-05	0.0018879
ENSMUSG00000040164	Kcns1	28.4328	2.20581	0.523312	4.2151	2.49662e-05	0.00194273
ENSMUSG00000040258	Nxph4	436.879	-0.806764	0.191862	-4.20492	2.61178e-05	0.00202192
ENSMUSG00000039238	Zfp750	22.384	6.03783	1.43822	4.19812	2.6914e-05	0.00207293
ENSMUSG00000003955	Fam162a	1070.88	-0.64649	0.154825	-4.17563	2.97168e-05	0.00227718
ENSMUSG00000036825	Ssx2ip	430.704	-0.547876	0.131898	-4.15379	3.27008e-05	0.00249318
ENSMUSG00000048782	Insc	268.541	0.819785	0.198283	4.13442	3.55846e-05	0.00269942
ENSMUSG00000036862	Dchs1	1179.05	0.534352	0.129329	4.13172	3.60058e-05	0.00270521
ENSMUSG00000047420	Fam180a	420.333	0.650323	0.157401	4.13163	3.60193e-05	0.00270521
ENSMUSG00000023411	Nfatc4	1298.81	0.505944	0.122578	4.12753	3.66674e-05	0.00274025
ENSMUSG00000020183	Cpm	1725.03	-0.91702	0.223175	-4.10897	3.97426e-05	0.00295544
ENSMUSG00000031853	Map3k21	62.9051	-1.19989	0.292225	-4.10603	4.02509e-05	0.00297857
ENSMUSG00000031610	Scrg1	218.415	-1.40476	0.342763	-4.09834	4.16125e-05	0.0030519
ENSMUSG00000086040	Wipf3	356.252	-0.59136	0.144299	-4.09815	4.16463e-05	0.0030519
ENSMUSG00000044217	Aqp5	560.096	1.26478	0.309794	4.08264	4.45262e-05	0.00323158
ENSMUSG00000058420	Syt17	56	1.26087	0.3088	4.08313	4.44339e-05	0.00323158
ENSMUSG00000090394	4930523C07Rik	473.131	-0.637678	0.156574	-4.0727	4.64705e-05	0.00335655
ENSMUSG00000030089	Slc41a3	574.017	-0.692049	0.170057	-4.06951	4.71117e-05	0.00338327
ENSMUSG00000071178	Serpina1b	19.2825	4.15594	1.02146	4.06864	4.72886e-05	0.00338327
ENSMUSG00000047963	Stbd1	301.668	-1.18163	0.290874	-4.06235	4.85811e-05	0.00345934
ENSMUSG00000030772	Dkk3	5546.36	-0.476808	0.117527	-4.05699	4.97083e-05	0.00350653
ENSMUSG00000038600	Atp6v0a4	1054.69	0.723897	0.178423	4.05719	4.96662e-05	0.00350653
ENSMUSG00000031994	Adamts8	202.782	-1.19214	0.294713	-4.04508	5.23054e-05	0.00367257
ENSMUSG00000031147	Magix	132.343	-0.964081	0.239254	-4.02953	5.58876e-05	0.00390592
ENSMUSG00000023942	Slc29a1	2296.79	0.432142	0.107689	4.01287	5.99847e-05	0.00417294
ENSMUSG00000050556	Kcnb1	447.619	-0.781771	0.194884	-4.01147	6.03411e-05	0.00417848
ENSMUSG00000032332	Col12a1	18623.8	0.759561	0.189404	4.01027	6.06495e-05	0.00418066
ENSMUSG00000055489	Ano5	629.019	-1.29251	0.322883	-4.00303	6.25376e-05	0.00429122
ENSMUSG00000048078	Tenm4	758.59	0.868468	0.217036	4.00149	6.29455e-05	0.00429966
ENSMUSG00000003378	Grik5	584.981	0.602261	0.150601	3.99904	6.35996e-05	0.00432478
ENSMUSG00000024173	Tpsab1	92.7363	2.23293	0.560698	3.9824	6.82215e-05	0.00461826
ENSMUSG00000067377	Tspan6	496.604	0.706415	0.17754	3.9789	6.92362e-05	0.00464974
ENSMUSG00000068923	Syt11	533.012	0.604694	0.151984	3.97867	6.93025e-05	0.00464974
ENSMUSG00000020396	Nefh	66.7627	1.59178	0.401413	3.96545	7.32584e-05	0.0048934
ENSMUSG00000023484	Prph	114.399	0.849935	0.214526	3.96191	7.43517e-05	0.00494455
ENSMUSG00000059895	Ptp4a3	3248.65	-0.860859	0.2174	-3.95979	7.50155e-05	0.00496681
ENSMUSG00000029757	Dync1i1	142.262	-0.788576	0.199559	-3.95159	7.7633e-05	0.00511767
ENSMUSG00000023022	Lima1	4454.07	0.41832	0.105907	3.94987	7.81945e-05	0.00513228
ENSMUSG00000041660	Bbox1	37.7967	1.89154	0.479072	3.94835	7.86917e-05	0.00514255
ENSMUSG00000047434	Xxylt1	427.969	0.569818	0.144962	3.9308	8.46621e-05	0.00550888
ENSMUSG00000025964	Adam23	403.601	0.742149	0.188977	3.92719	8.59426e-05	0.00554823
ENSMUSG00000068739	Sars	2318.29	0.440636	0.112206	3.92703	8.6002e-05	0.00554823
ENSMUSG00000021953	Tdh	162.459	0.901276	0.230045	3.91783	8.93506e-05	0.00570997
ENSMUSG00000049907	Rasl11b	1038.79	0.73207	0.186894	3.91704	8.96438e-05	0.00570997
ENSMUSG00000050164	Mchr1	75.8165	-1.53017	0.390593	-3.91755	8.94539e-05	0.00570997
ENSMUSG00000039313	AF529169	28.1421	-3.2343	0.826952	-3.91111	9.18733e-05	0.00582739
ENSMUSG00000003477	Inmt	35.7982	-2.04297	0.524458	-3.89539	9.80412e-05	0.00619259
ENSMUSG00000022596	Slurp1	50.7101	-2.18937	0.563452	-3.88564	0.000102059	0.00641951
ENSMUSG00000049336	Tenm2	67.8519	1.49776	0.385739	3.88284	0.000103241	0.00646694
ENSMUSG00000024810	Il33	643.378	0.811281	0.209063	3.88056	0.000104216	0.00650099
ENSMUSG00000033327	Tnxb	10266.1	-0.41563	0.107251	-3.87529	0.000106497	0.00658886
ENSMUSG00000075012	Fjx1	238.79	0.860793	0.222067	3.87628	0.000106065	0.00658886
ENSMUSG00000020814	Mxra7	2791.63	0.425567	0.109879	3.87307	0.000107474	0.00662217
ENSMUSG00000026443	Lrrn2	639.114	0.873385	0.225746	3.86888	0.000109337	0.00670954
ENSMUSG00000041798	Gck	18.5705	-2.80217	0.725124	-3.8644	0.000111364	0.00680626
ENSMUSG00000038463	Olfml2b	3699.81	0.615423	0.159301	3.86328	0.000111874	0.00680986
ENSMUSG00000037820	Tgm2	3339.15	-0.429239	0.111157	-3.86154	0.000112674	0.00683105
ENSMUSG00000006205	Htra1	12645.7	0.478348	0.123926	3.85993	0.000113419	0.0068487
ENSMUSG00000028291	Akirin2	716.338	0.591176	0.154078	3.83687	0.000124612	0.00749457
ENSMUSG00000026335	Pam	18238.3	-0.492121	0.128529	-3.82886	0.000128737	0.00771196
ENSMUSG00000031026	Trim66	45.4727	1.44129	0.376826	3.8248	0.000130878	0.00780925
ENSMUSG00000027204	Fbn1	14717.6	0.548124	0.143405	3.82222	0.000132255	0.00786034
ENSMUSG00000085348	Myhas	182.886	-1.84957	0.484429	-3.81804	0.000134515	0.00796326
ENSMUSG00000059991	Nptx2	23.9066	2.3076	0.605225	3.8128	0.000137402	0.0081024
ENSMUSG00000028931	Kcnab2	252.583	-0.653337	0.171994	-3.79861	0.000145508	0.00854706
ENSMUSG00000028047	Thbs3	2511.46	0.512061	0.134888	3.7962	0.000146929	0.00859707
ENSMUSG00000041773	Enc1	781.158	0.946128	0.249508	3.79198	0.000149451	0.00871089
ENSMUSG00000025791	Pgm2	3390.46	-1.23757	0.326577	-3.78952	0.000150937	0.00876364
ENSMUSG00000040537	Adam22	436.325	0.748652	0.197927	3.78247	0.000155282	0.00898137
ENSMUSG00000079428	Tceal7	601.154	-0.916331	0.242407	-3.78014	0.000156743	0.00903128
ENSMUSG00000074736	Syndig1	22.6446	2.2154	0.588229	3.76623	0.000165734	0.00951301
ENSMUSG00000015843	Rxrg	159.408	-1.13909	0.302713	-3.76293	0.000167934	0.00958267
ENSMUSG00000023032	Slc4a8	108.296	-0.937162	0.249079	-3.76251	0.000168217	0.00958267
ENSMUSG00000006800	Sulf2	2853.28	0.704584	0.187374	3.76031	0.000169704	0.00959492
ENSMUSG00000038668	Lpar1	2650.22	0.431821	0.114813	3.76109	0.000169173	0.00959492
ENSMUSG00000022283	Pabpc1	7317.77	0.481898	0.128305	3.75589	0.000172726	0.00972939
ENSMUSG00000003363	Pld3	1331.54	0.435332	0.116077	3.75037	0.000176577	0.00990931
ENSMUSG00000062070	Pgk1	5573.6	-0.8604	0.230371	-3.73484	0.000187835	0.0105021
ENSMUSG00000043631	Ecm2	4566.61	-0.3972	0.106422	-3.73229	0.000189746	0.0105698
ENSMUSG00000067158	Col4a4	210.188	-0.876404	0.234966	-3.72991	0.000191545	0.0105918
ENSMUSG00000070574	2310016G11Rik	14.2488	2.73929	0.734231	3.73083	0.000190853	0.0105918
ENSMUSG00000036390	Gadd45a	365.52	0.787182	0.211233	3.7266	0.000194081	0.010654
ENSMUSG00000045573	Penk	394.978	0.572439	0.153574	3.72746	0.00019342	0.010654
ENSMUSG00000030621	Me3	333.822	-0.863127	0.232017	-3.72011	0.000199137	0.0108919
ENSMUSG00000001751	Naglu	1169.29	0.580629	0.156342	3.71384	0.000204138	0.0110852
ENSMUSG00000030431	Tmem238	331.222	0.593632	0.159813	3.71453	0.000203578	0.0110852
ENSMUSG00000024987	Cyp26a1	341.296	0.590242	0.159276	3.70578	0.000210741	0.0113619
ENSMUSG00000048758	Rpl29	2661.05	1.19189	0.321557	3.70661	0.000210054	0.0113619
ENSMUSG00000041329	Atp1b2	1125.29	-1.02336	0.276363	-3.70294	0.000213119	0.0114492
ENSMUSG00000026380	Tfcp2l1	87.9069	-1.06019	0.286794	-3.69668	0.000218435	0.0116933
ENSMUSG00000010307	Tmem86a	507.085	0.600803	0.16304	3.68501	0.000228693	0.0121135
ENSMUSG00000056174	Col8a2	5361.55	0.460706	0.124998	3.68572	0.000228061	0.0121135
ENSMUSG00000063873	Slc24a3	478.612	0.566748	0.153778	3.6855	0.000228252	0.0121135
ENSMUSG00000092009	Myh15	27.0726	2.06188	0.559747	3.68359	0.000229975	0.0121388
ENSMUSG00000063903	Klk1	37.4042	-1.6834	0.457569	-3.67902	0.000234133	0.0123152
ENSMUSG00000027004	Frzb	622.371	-0.582726	0.158542	-3.67553	0.000237352	0.0124078
ENSMUSG00000057722	Lepr	1321.74	-0.643678	0.175134	-3.67534	0.000237537	0.0124078
ENSMUSG00000026123	Plekhb2	779.07	-0.858026	0.233725	-3.67109	0.000241518	0.0125478
ENSMUSG00000081434	Gm14165	83.5858	2.27499	0.619768	3.67071	0.000241878	0.0125478
ENSMUSG00000032579	Hemk1	244.374	-0.90877	0.247703	-3.66878	0.000243709	0.0125994
ENSMUSG00000036832	Lpar3	141.651	0.991165	0.270346	3.66628	0.000246103	0.0126798
ENSMUSG00000052852	Reep1	418.55	-0.729488	0.200103	-3.64557	0.000266803	0.0136995
ENSMUSG00000035441	Myo1d	2904.06	0.421742	0.116144	3.6312	0.000282108	0.0144363
ENSMUSG00000056501	Cebpb	860.335	0.906169	0.249873	3.62652	0.000287266	0.0146505
ENSMUSG00000049687	Fam109b	274.867	0.680394	0.187711	3.6247	0.000289302	0.0147047
ENSMUSG00000027750	Postn	9321.07	0.959932	0.26494	3.62321	0.000290971	0.0147053
ENSMUSG00000047604	Frat2	170.491	-0.701236	0.193554	-3.62295	0.000291262	0.0147053
ENSMUSG00000026249	Serpine2	3278.89	-0.696868	0.192608	-3.61807	0.000296813	0.0149356
ENSMUSG00000035274	Tpbg	78.0625	1.03607	0.287528	3.60337	0.00031412	0.015754
ENSMUSG00000026014	Raph1	1475.84	-0.375787	0.10438	-3.60018	0.000318001	0.0158434
ENSMUSG00000086320	Gm12840	20.2622	-3.54149	0.983513	-3.60086	0.000317171	0.0158434
ENSMUSG00000020607	Fam84a	32.0553	2.99966	0.835247	3.59134	0.000328977	0.0163363
ENSMUSG00000009114	2610028H24Rik	24.1171	2.46177	0.686006	3.58855	0.000332519	0.0163908
ENSMUSG00000028600	Podn	1130.22	0.573896	0.159952	3.58792	0.000333331	0.0163908
ENSMUSG00000043557	Mdga1	539.884	-0.667534	0.185977	-3.58934	0.000331521	0.0163908
ENSMUSG00000019932	Kera	10426.8	0.424712	0.118414	3.58669	0.000334906	0.0164147
ENSMUSG00000025776	Crispld1	1449.78	0.802871	0.224037	3.58365	0.000338827	0.0165532
ENSMUSG00000027612	Mmp24	65.2331	-1.33803	0.373498	-3.58243	0.000340409	0.0165768
ENSMUSG00000036560	Lgi4	276.018	-1.00612	0.281447	-3.57483	0.00035046	0.0169737
ENSMUSG00000092397	C130080G10Rik	25.2984	-4.11618	1.15152	-3.57457	0.000350808	0.0169737
ENSMUSG00000023169	Slc38a1	1016.37	-0.532818	0.149183	-3.57157	0.000354853	0.0171146
ENSMUSG00000059857	Ntng1	209.486	0.696007	0.195428	3.56144	0.000368822	0.0176753
ENSMUSG00000061731	Ext1	1792.16	0.369909	0.103855	3.56179	0.000368335	0.0176753
ENSMUSG00000098178	Gm42418	244129	-0.798151	0.224171	-3.56046	0.000370207	0.0176856
ENSMUSG00000062542	Syt9	103.048	0.840067	0.236187	3.55679	0.000375415	0.0178778
ENSMUSG00000030730	Atp2a1	63433.6	-1.18104	0.332505	-3.55196	0.000382376	0.018152
ENSMUSG00000049551	Fzd9	1323.11	-0.816306	0.230124	-3.54724	0.000389287	0.0184222
ENSMUSG00000020386	Sar1b	1248.03	-0.880369	0.248294	-3.54568	0.000391608	0.0184741
ENSMUSG00000033044	Dhrs7c	848.419	-1.13497	0.320352	-3.54287	0.000395792	0.0186133
ENSMUSG00000073771	Btbd19	216.951	0.626103	0.176909	3.53914	0.000401438	0.0188202
ENSMUSG00000048416	Mlf1	1208.09	-0.83124	0.235308	-3.53256	0.00041156	0.019235
ENSMUSG00000007122	Casq1	12409.5	-1.20132	0.340241	-3.53077	0.000414347	0.0192612
ENSMUSG00000024411	Aqp4	281.927	-1.15813	0.32803	-3.53057	0.000414671	0.0192612
ENSMUSG00000027188	Pamr1	1730.43	0.718206	0.2039	3.52234	0.000427761	0.0198082
ENSMUSG00000015501	Hivep2	2194.08	0.417172	0.118589	3.51779	0.000435149	0.0200887
ENSMUSG00000039661	Dusp26	259.542	-0.649871	0.184942	-3.51391	0.000441565	0.020261
ENSMUSG00000045838	A430105I19Rik	392.91	-0.557522	0.158652	-3.51412	0.000441207	0.020261
ENSMUSG00000041132	N4bp2l1	171.553	1.02031	0.290824	3.50835	0.000450891	0.0205933
ENSMUSG00000049404	Rarres1	143.181	-0.770201	0.219557	-3.50797	0.000451535	0.0205933
ENSMUSG00000051980	Casr	54.4343	-1.18985	0.339588	-3.50381	0.000458644	0.0208545
ENSMUSG00000052738	Suclg1	1993.45	-0.558298	0.159733	-3.49519	0.000473729	0.0214757
ENSMUSG00000038259	Gdf5	175.523	-0.945189	0.271599	-3.48009	0.000501245	0.0226551
ENSMUSG00000020955	Ap4s1	459.108	-0.518698	0.149158	-3.47751	0.000506098	0.0228061
ENSMUSG00000016256	Ctsz	3179.59	0.477514	0.137516	3.47242	0.000515788	0.0230096
ENSMUSG00000032017	Grik4	95.5947	1.11515	0.321189	3.47194	0.00051671	0.0230096
ENSMUSG00000032860	P2ry2	639.9	-0.662925	0.190918	-3.4723	0.000516011	0.0230096
ENSMUSG00000075232	Amd1	1154.55	-1.23476	0.35554	-3.47291	0.000514852	0.0230096
ENSMUSG00000000168	Dlat	3150.54	-0.592802	0.170872	-3.46928	0.000521863	0.0230912
ENSMUSG00000031250	Tnmd	24891.4	0.405507	0.116907	3.46862	0.000523131	0.0230912
ENSMUSG00000061718	Ppp1r1b	40.8253	-1.25596	0.362088	-3.46866	0.000523064	0.0230912
ENSMUSG00000028132	Tmem56	556.182	-0.522515	0.150782	-3.46538	0.000529489	0.0233037
ENSMUSG00000026600	Soat1	379.213	0.466086	0.134801	3.4576	0.000545018	0.0239174
ENSMUSG00000063953	Amd2	74.4209	-1.9177	0.555209	-3.45401	0.000552318	0.0241675
ENSMUSG00000024304	Cdh2	567.022	0.713378	0.20699	3.44643	0.000568044	0.0247473
ENSMUSG00000025579	Gaa	3001.91	0.439334	0.127489	3.44605	0.000568847	0.0247473
ENSMUSG00000052146	Rps10	3404.71	0.48211	0.140116	3.44079	0.000580025	0.0251611
ENSMUSG00000007682	Dio2	228.001	0.722608	0.210208	3.43758	0.000586939	0.0252434
ENSMUSG00000026697	Myoc	5192.25	-2.2145	0.643929	-3.43905	0.000583764	0.0252434
ENSMUSG00000054728	Phactr1	382.463	0.706544	0.205509	3.43802	0.000585976	0.0252434
ENSMUSG00000000753	Serpinf1	55475.8	0.348671	0.101465	3.43636	0.000589591	0.0252854
ENSMUSG00000033998	Kcnk1	766.752	-0.744472	0.217225	-3.42719	0.000609863	0.0260807
ENSMUSG00000045318	Adra2c	122.235	1.13046	0.329948	3.42619	0.000612109	0.0261028
ENSMUSG00000024597	Slc12a2	1657.97	-0.361859	0.105824	-3.41943	0.000627535	0.0263943
ENSMUSG00000028943	Espn	129.095	0.772219	0.225874	3.4188	0.000628972	0.0263943
ENSMUSG00000029544	Cabp1	151.876	0.738514	0.215897	3.42068	0.000624637	0.0263943
ENSMUSG00000036459	Wtip	714.433	0.520475	0.152248	3.4186	0.000629435	0.0263943
ENSMUSG00000041120	Nbl1	7240.4	0.658795	0.192683	3.41907	0.000628357	0.0263943
ENSMUSG00000068522	Aard	153.45	0.871764	0.254881	3.42028	0.000625561	0.0263943
ENSMUSG00000044005	Gls2	39.7432	1.18149	0.345747	3.41721	0.000632669	0.0264564
ENSMUSG00000017300	Tnnc2	23309.2	-1.09578	0.321049	-3.41313	0.000642217	0.0267505
ENSMUSG00000033825	Tpsb2	180.931	0.621766	0.182192	3.41269	0.000643246	0.0267505
ENSMUSG00000019933	Mrln	102.227	-1.07526	0.315472	-3.40842	0.000653398	0.0270981
ENSMUSG00000044393	Dsg2	46.5918	1.25535	0.368578	3.40593	0.000659396	0.0272719
ENSMUSG00000028591	Pramef12	26.5647	1.64409	0.482975	3.40409	0.000663846	0.0273809
ENSMUSG00000093803	Ppp2r3d	464.925	0.456246	0.134167	3.40059	0.000672408	0.0276585
ENSMUSG00000003273	Car11	115.47	0.741682	0.218421	3.39565	0.000684655	0.0279449
ENSMUSG00000059436	Max	1323.54	-0.365054	0.107485	-3.39634	0.000682934	0.0279449
ENSMUSG00000086841	2410006H16Rik	240.102	0.793341	0.233642	3.39554	0.000684924	0.0279449
ENSMUSG00000024846	Cst6	61.9417	1.44868	0.427365	3.3898	0.000699433	0.02846
ENSMUSG00000038112	AW551984	216.439	0.748095	0.220883	3.38684	0.000707015	0.0286911
ENSMUSG00000024420	Zfp521	1545.82	0.474698	0.140616	3.37583	0.000735925	0.0297842
ENSMUSG00000027430	Dtd1	297.577	0.57887	0.172075	3.36405	0.000768065	0.0310019
ENSMUSG00000020695	Mrc2	6981.36	0.282612	0.0841229	3.35951	0.000780806	0.0314321
ENSMUSG00000025537	Phkg1	910.524	-1.1735	0.349697	-3.35575	0.00079151	0.0316102
ENSMUSG00000047246	Hist1h2be	89.4851	-1.1682	0.348016	-3.35675	0.000788643	0.0316102
ENSMUSG00000074971	Fibin	7843.74	0.499437	0.148818	3.35602	0.000790721	0.0316102
ENSMUSG00000029563	Foxp2	103.067	0.830946	0.247948	3.3513	0.000804344	0.032038
ENSMUSG00000004360	9330159F19Rik	277.363	-0.663838	0.198384	-3.34623	0.00081918	0.032543
ENSMUSG00000024990	Rbp4	511.474	0.695584	0.208185	3.34119	0.000834212	0.032934
ENSMUSG00000032220	Myo1e	2127.89	0.517784	0.15497	3.34119	0.000834208	0.032934
ENSMUSG00000042804	Gpr153	1746.25	0.506458	0.151633	3.34001	0.00083775	0.032934
ENSMUSG00000048814	Lonrf2	59.4469	0.971788	0.290917	3.34043	0.000836473	0.032934
ENSMUSG00000027488	Snta1	1861.78	-0.550049	0.164832	-3.33703	0.000846789	0.0332029
ENSMUSG00000054958	Nt5c1a	21.8749	-1.80491	0.542596	-3.32643	0.000879645	0.0344019
ENSMUSG00000024617	Camk2a	1335.84	-1.05325	0.316916	-3.32342	0.000889195	0.0346855
ENSMUSG00000032279	Idh3a	3535.31	-0.627425	0.18903	-3.31918	0.000902834	0.0351267
ENSMUSG00000027887	Sypl2	3691.04	-0.94124	0.283639	-3.31844	0.000905224	0.0351292
ENSMUSG00000026255	Efhd1	537.321	-0.753128	0.227097	-3.31633	0.000912092	0.035305
ENSMUSG00000042379	Esm1	60.692	-1.09794	0.331287	-3.31416	0.000919179	0.0353978
ENSMUSG00000058975	Kcnc1	744.435	-0.612576	0.184823	-3.3144	0.000918397	0.0353978
ENSMUSG00000032114	Slc37a4	541.341	-1.19336	0.360468	-3.31059	0.000930989	0.0357613
ENSMUSG00000031861	Lpar2	21.2466	1.68412	0.509052	3.30834	0.000938512	0.0358678
ENSMUSG00000031952	Chst5	144.632	1.03646	0.313232	3.30893	0.000936531	0.0358678
ENSMUSG00000020277	Pfkl	933.202	-0.514276	0.155505	-3.30713	0.000942567	0.0359318
ENSMUSG00000067653	Ankrd23	1799.85	-1.71617	0.51983	-3.30141	0.000962013	0.0365807
ENSMUSG00000045319	Proser2	179.665	-0.904032	0.274317	-3.29557	0.000982206	0.0372547
ENSMUSG00000046312	AI464131	1075.34	-0.576873	0.175348	-3.28987	0.00100234	0.0379231
ENSMUSG00000026696	Vamp4	1093.2	-0.448683	0.136469	-3.28779	0.00100976	0.0381085
ENSMUSG00000058013	2020-09-11	1540.21	0.3946	0.120202	3.2828	0.0010278	0.0386925
ENSMUSG00000032440	Tgfbr2	4547.37	0.323191	0.0985098	3.2808	0.00103514	0.0388719
ENSMUSG00000074622	Mafb	1432.45	0.65382	0.199429	3.27846	0.00104373	0.0390973
ENSMUSG00000028757	Ddost	4183.84	0.411717	0.125701	3.27537	0.00105522	0.0394297
ENSMUSG00000021032	Ngb	20.2564	-1.79229	0.547351	-3.27448	0.00105857	0.0394573
ENSMUSG00000102805	Gm37240	28.582	-1.38628	0.424034	-3.26926	0.00107829	0.0400934
ENSMUSG00000058488	Kl	25.2062	-1.84499	0.564538	-3.26815	0.00108254	0.0401525
ENSMUSG00000036585	Fgf1	792.276	-0.559835	0.171539	-3.2636	0.00110005	0.040702
ENSMUSG00000024620	Pdgfrb	2999.56	0.498457	0.152808	3.26198	0.00110637	0.0407359
ENSMUSG00000092035	Peg10	256.738	-0.7868	0.241191	-3.26215	0.00110571	0.0407359
ENSMUSG00000023013	Aqp2	60.2022	-1.42363	0.436602	-3.26069	0.00111141	0.0408218
ENSMUSG00000000957	Mmp14	4629.67	0.493303	0.151813	3.24941	0.00115645	0.0422706
ENSMUSG00000020653	Klf11	384.846	0.567413	0.174605	3.24969	0.00115531	0.0422706
ENSMUSG00000028517	Plpp3	6707.56	-0.393915	0.121253	-3.24871	0.0011593	0.0422725
ENSMUSG00000022500	Litaf	684.487	0.398332	0.122751	3.24503	0.00117439	0.0427196
ENSMUSG00000017404	Rpl19	5542.66	0.418879	0.129177	3.24267	0.00118416	0.0428683
ENSMUSG00000031543	Ank1	1898.06	-0.915499	0.28231	-3.24289	0.00118325	0.0428683
ENSMUSG00000002603	Tgfb1	1488.71	0.466294	0.143982	3.23857	0.00120131	0.0432815
ENSMUSG00000060981	Hist1h4h	205.297	-0.776288	0.239691	-3.2387	0.00120074	0.0432815
ENSMUSG00000048027	Rgmb	664.81	0.403783	0.124951	3.23152	0.00123135	0.0442581
ENSMUSG00000020623	Map2k6	285.995	-0.870744	0.269746	-3.22801	0.00124653	0.0446974
ENSMUSG00000001493	Meox1	676.528	0.704123	0.218276	3.22584	0.00125604	0.0448916
ENSMUSG00000036879	Phkb	1196.66	-0.815961	0.252979	-3.22541	0.00125794	0.0448916
ENSMUSG00000041734	Kirrel	1968.25	0.361933	0.112236	3.22474	0.00126087	0.0448916
ENSMUSG00000038754	Elovl3	14.7781	4.37122	1.35661	3.22217	0.00127225	0.0451904
ENSMUSG00000035914	Cd276	1231.92	0.419693	0.130333	3.22017	0.00128114	0.0453994
ENSMUSG00000031734	Irx3	200.619	0.768716	0.238908	3.21762	0.00129257	0.0456971
ENSMUSG00000024659	Anxa1	3373.19	0.413136	0.128461	3.21604	0.00129972	0.0458105
ENSMUSG00000029673	Auts2	849.842	0.385663	0.119936	3.21557	0.00130185	0.0458105
ENSMUSG00000030257	Srgap3	848.505	0.498396	0.155219	3.21093	0.00132306	0.0464487
ENSMUSG00000029661	Col1a2	2.0479e+06	-0.452506	0.141224	-3.20417	0.00135455	0.0474437
ENSMUSG00000015222	Map2	420.123	1.13142	0.353232	3.20306	0.00135974	0.0474568
ENSMUSG00000062006	Rpl34	2299.57	0.624587	0.195016	3.20275	0.00136121	0.0474568
ENSMUSG00000023972	Ptk7	782.259	0.489076	0.153017	3.19623	0.00139236	0.0484311
ENSMUSG00000064267	Hvcn1	92.1769	0.889658	0.278553	3.19385	0.00140389	0.0487197
ENSMUSG00000022797	Tfrc	2655.05	-0.74459	0.233225	-3.19259	0.00141003	0.0488206
ENSMUSG00000024998	Plce1	1138.33	0.553837	0.17377	3.18719	0.00143664	0.0496282
ENSMUSG00000031519	Asb5	594.637	-0.832232	0.261777	-3.17917	0.00147698	0.0509051
ENSMUSG00000017897	Eya2	386.111	0.741003	0.233197	3.17758	0.00148507	0.0510676
ENSMUSG00000069806	Cacng7	273.089	0.971653	0.306159	3.17369	0.00150515	0.0516201
ENSMUSG00000085839	Gm15949	63.3074	-1.21153	0.381807	-3.17314	0.00150798	0.0516201
ENSMUSG00000039601	Rcan2	1013.33	-0.546522	0.17237	-3.17063	0.00152107	0.0519505
ENSMUSG00000055301	Adh7	86.5449	1.14335	0.361566	3.16222	0.00156573	0.0533551
ENSMUSG00000046027	Stard5	372.335	0.619123	0.195862	3.16101	0.00157222	0.0534556
ENSMUSG00000040502	2020-03-09	145.38	0.702499	0.222285	3.16035	0.0015758	0.0534569
ENSMUSG00000026768	Itga8	324.408	0.927569	0.293787	3.15729	0.00159245	0.0539004
ENSMUSG00000012848	Rps5	5059.24	0.470722	0.149199	3.155	0.001605	0.0541613
ENSMUSG00000028246	Faxc	67.113	1.03887	0.329323	3.15457	0.00160733	0.0541613
ENSMUSG00000037493	Cib2	297.539	-1.11665	0.355352	-3.14239	0.00167573	0.0563404
ENSMUSG00000044674	Fzd1	4084.89	0.399126	0.127082	3.1407	0.00168547	0.0565417
ENSMUSG00000000805	Car4	152.988	0.718703	0.229066	3.13754	0.0017037	0.0570266
ENSMUSG00000057897	Camk2b	1906.76	-0.592375	0.188844	-3.13686	0.0017077	0.057034
ENSMUSG00000028949	Smarcd3	892.766	-0.561764	0.179381	-3.13168	0.00173812	0.0579218
ENSMUSG00000025147	Mob2	1022.94	-0.350833	0.112073	-3.1304	0.00174566	0.0580451
ENSMUSG00000030672	Mylpf	38220.7	-0.963929	0.308061	-3.12902	0.00175393	0.0581919
ENSMUSG00000030739	Myh14	843.81	0.675359	0.216007	3.12656	0.00176866	0.0584238
ENSMUSG00000053398	Phgdh	1202.62	0.641372	0.205135	3.12658	0.00176853	0.0584238
ENSMUSG00000030862	Cpxm2	15650.2	0.326683	0.104663	3.12128	0.00180064	0.0593504
ENSMUSG00000042828	Trim72	3478.75	-0.562158	0.180226	-3.11918	0.00181353	0.0594629
ENSMUSG00000053137	Mapk11	122.842	0.65861	0.211122	3.11957	0.00181115	0.0594629
ENSMUSG00000096225	Lhx8	193.41	0.683893	0.21928	3.1188	0.00181587	0.0594629
ENSMUSG00000078794	Dact3	692.373	0.468563	0.150578	3.11177	0.00185971	0.0607666
ENSMUSG00000040734	Ppp1r13l	221.591	0.611873	0.19675	3.1099	0.0018715	0.0610198
ENSMUSG00000034055	Phka1	1524.47	-1.03313	0.332498	-3.10719	0.00188875	0.0613172
ENSMUSG00000054003	Tdrd9	16.2475	2.01864	0.649574	3.10764	0.0018859	0.0613172
ENSMUSG00000048388	Fam171b	522.477	0.475382	0.15307	3.10565	0.00189861	0.0615053
ENSMUSG00000073730	4933415F23Rik	23.3824	-1.49112	0.480469	-3.10346	0.00191269	0.0618288
ENSMUSG00000020372	Rack1	7144.79	0.386042	0.124456	3.10183	0.00192329	0.0619061
ENSMUSG00000059898	Dsc3	100.836	3.17231	1.02267	3.10198	0.00192234	0.0619061
ENSMUSG00000023393	Slc17a9	170.722	-0.73762	0.237997	-3.09928	0.00193992	0.0623085
ENSMUSG00000086119	Gm2415	130.896	0.916436	0.296445	3.09142	0.00199201	0.0637105
ENSMUSG00000092118	Fancf	108.085	0.678334	0.219392	3.09188	0.00198892	0.0637105
ENSMUSG00000042686	Jph1	1969.87	-0.978055	0.316451	-3.0907	0.00199685	0.0637305
ENSMUSG00000070047	Fat1	3133.51	0.525965	0.170351	3.08753	0.00201828	0.0642782
ENSMUSG00000020108	Ddit4	1094.6	0.70683	0.229416	3.08099	0.00206315	0.0655689
ENSMUSG00000033624	Pdpr	981.124	-0.605164	0.196545	-3.07901	0.00207692	0.0658682
ENSMUSG00000035606	Ky	1480.47	-1.01095	0.32979	-3.06543	0.00217356	0.0686446
ENSMUSG00000046623	Gjb4	13.8359	4.30141	1.40314	3.06555	0.00217271	0.0686446
ENSMUSG00000017314	Mpp2	150.919	-0.658096	0.214793	-3.06386	0.00218501	0.0687187
ENSMUSG00000085438	1700020I14Rik	5482.1	-0.532119	0.173666	-3.06403	0.00218376	0.0687187
ENSMUSG00000029373	Pf4	454.559	-0.423182	0.138347	-3.05885	0.00222189	0.0697061
ENSMUSG00000033508	Asprv1	13.3815	4.65041	1.52057	3.05834	0.00222564	0.0697061
ENSMUSG00000047675	Rps8	7481.06	0.452354	0.148025	3.05592	0.00224369	0.0701257
ENSMUSG00000001630	Stk38l	706.96	-0.350972	0.11499	-3.05219	0.00227177	0.0708568
ENSMUSG00000099411	2310015D24Rik	106.536	-1.01354	0.332206	-3.05094	0.00228125	0.0710057
ENSMUSG00000000402	Egfl6	471.181	0.74521	0.244393	3.04923	0.00229429	0.0711181
ENSMUSG00000020326	Ccng1	4515.31	-0.749698	0.245864	-3.04924	0.00229423	0.0711181
ENSMUSG00000039542	Ncam1	727.736	0.514996	0.168954	3.04814	0.00230266	0.0712314
ENSMUSG00000026051	1500015O10Rik	9374.39	-0.375795	0.123342	-3.04676	0.00231321	0.0713146
ENSMUSG00000035640	Cbarp	70.9619	0.863216	0.283342	3.04656	0.0023148	0.0713146
ENSMUSG00000028020	Glrb	79.7398	0.887651	0.291928	3.04065	0.00236071	0.072581
ENSMUSG00000027397	Slc20a1	588.409	0.66976	0.220752	3.034	0.00241338	0.0739758
ENSMUSG00000048612	Myof	2389.24	0.393645	0.129758	3.03368	0.00241588	0.0739758
ENSMUSG00000027932	Slc27a3	626.613	-0.506463	0.167016	-3.03242	0.00242604	0.0739868
ENSMUSG00000074649	BC029722	606.021	-0.462078	0.152364	-3.03272	0.00242358	0.0739868
ENSMUSG00000045594	Glb1	373.957	0.543997	0.179547	3.02983	0.0024469	0.0744727
ENSMUSG00000006457	Actn3	9280.16	-3.47718	1.14833	-3.02804	0.00246145	0.0746147
ENSMUSG00000024076	Vit	2613.88	-0.528108	0.174391	-3.0283	0.00245932	0.0746147
ENSMUSG00000028059	Arhgef2	2146.81	0.364224	0.120556	3.0212	0.00251778	0.0761693
ENSMUSG00000057841	Rpl32	4405.91	0.427653	0.141591	3.02035	0.00252484	0.0762298
ENSMUSG00000040690	Col16a1	12190.8	0.324723	0.107738	3.01402	0.00257812	0.0776833
ENSMUSG00000006818	Sod2	2155.08	-0.529808	0.175959	-3.01098	0.00260407	0.0781763
ENSMUSG00000037573	Tob1	2425.36	-0.413884	0.137462	-3.01089	0.00260484	0.0781763
ENSMUSG00000029119	Man2b2	1984.31	0.361375	0.120128	3.00826	0.00262752	0.0787004
ENSMUSG00000035041	Creb3l3	234.67	-0.85284	0.283649	-3.00668	0.00264118	0.0789529
ENSMUSG00000028444	Cntfr	645.404	-0.909378	0.302753	-3.00369	0.00266723	0.0795742
ENSMUSG00000025425	St8sia5	112.976	-1.11232	0.370729	-3.00037	0.00269651	0.0801645
ENSMUSG00000067279	Ppp1r3c	1015.5	-0.885428	0.295119	-3.00024	0.00269764	0.0801645
ENSMUSG00000022816	Fstl1	22887	0.356477	0.118863	2.99906	0.00270818	0.0803196
ENSMUSG00000013701	Timm23	1648.15	-0.483978	0.161642	-2.99414	0.00275223	0.081466
ENSMUSG00000025732	Mcrip2	371.491	-0.60503	0.202318	-2.99048	0.00278536	0.0822852
ENSMUSG00000027962	Vcam1	301.259	0.825796	0.276242	2.98939	0.00279536	0.0824195
ENSMUSG00000097767	Miat	164.402	-1.23466	0.413202	-2.98803	0.00280783	0.0826257
ENSMUSG00000052316	Lrrc15	179.096	3.02485	1.01308	2.9858	0.00282841	0.0830695
ENSMUSG00000103409	Lsmem2	105.154	-0.873324	0.292709	-2.98359	0.00284888	0.0835081
ENSMUSG00000056367	Actr3b	71.7503	-0.908331	0.304793	-2.98016	0.00288098	0.0842855
ENSMUSG00000023456	Tpi1	9910.32	-0.713404	0.23989	-2.97388	0.00294062	0.0858639
ENSMUSG00000037946	Fgd3	367.351	0.719008	0.241925	2.97202	0.00295843	0.086217
ENSMUSG00000030067	Foxp1	1418.5	0.386706	0.130161	2.97099	0.00296844	0.086342
ENSMUSG00000038712	Mindy1	793.854	0.392159	0.132293	2.96433	0.00303341	0.0880622
ENSMUSG00000006476	Nsmf	947.012	0.390148	0.131772	2.96079	0.00306849	0.0889098
ENSMUSG00000001436	Slc19a1	251.34	0.486053	0.164499	2.95476	0.00312915	0.0892955
ENSMUSG00000021676	Iqgap2	223.7	-0.484084	0.163686	-2.9574	0.00310243	0.0892955
ENSMUSG00000023075	Akirin1	668.145	-0.34473	0.116613	-2.9562	0.00311454	0.0892955
ENSMUSG00000024854	Pold4	301.859	0.512138	0.173365	2.9541	0.00313585	0.0892955
ENSMUSG00000028518	Prkaa2	1278.04	-0.798969	0.2701	-2.95805	0.00309597	0.0892955
ENSMUSG00000028710	Atpaf1	534.745	-0.569825	0.192585	-2.95882	0.00308823	0.0892955
ENSMUSG00000041482	Piezo2	822.697	0.453114	0.153411	2.9536	0.00314096	0.0892955
ENSMUSG00000047414	Flrt2	846.56	0.343035	0.116096	2.95476	0.00312916	0.0892955
ENSMUSG00000050967	Creg2	14.2112	1.99352	0.674836	2.95407	0.00313611	0.0892955
ENSMUSG00000108601	Gm44645	48.9138	1.09165	0.369462	2.95469	0.00312988	0.0892955
ENSMUSG00000024259	Slc25a46	926.845	-0.360795	0.122208	-2.95229	0.00315427	0.0895052
ENSMUSG00000028289	Epha7	177.276	0.624517	0.212004	2.94579	0.00322135	0.0912373
ENSMUSG00000024784	Gpha2	62.4377	0.952371	0.323374	2.9451	0.00322845	0.0912673
ENSMUSG00000027803	Wwtr1	3140.62	0.392161	0.133234	2.9434	0.00324631	0.0916005
ENSMUSG00000038670	Mybpc2	7217.92	-3.44877	1.17334	-2.93928	0.00328974	0.0926527
ENSMUSG00000063130	Calml3	27.4468	2.7569	0.93822	2.93843	0.00329876	0.0927338
ENSMUSG00000052143	Gm9869	50.1286	-1.36536	0.464889	-2.93696	0.00331449	0.093003
ENSMUSG00000038702	Dsel	1131.74	0.376883	0.128375	2.9358	0.00332688	0.0931773
ENSMUSG00000039579	Grin3a	227.936	-0.785091	0.267665	-2.93311	0.00335585	0.0938147
ENSMUSG00000024598	Fbn2	715.168	0.943407	0.32173	2.93229	0.00336468	0.0938388
ENSMUSG00000030423	Pop4	197.331	-0.528855	0.180381	-2.93188	0.00336915	0.0938388
ENSMUSG00000024210	Ip6k3	516.681	-0.588367	0.20079	-2.93026	0.00338673	0.0939183
ENSMUSG00000031834	Pik3r2	1355.61	0.304955	0.104084	2.9299	0.00339066	0.0939183
ENSMUSG00000037306	Man1c1	1814.71	0.495913	0.169242	2.9302	0.00338743	0.0939183
ENSMUSG00000010095	Slc3a2	2836.48	0.412818	0.14099	2.92799	0.00341159	0.0939805
ENSMUSG00000021365	Nedd9	804.639	0.388828	0.132777	2.92843	0.00340681	0.0939805
ENSMUSG00000066643	Wdr35	414.548	0.465895	0.159074	2.9288	0.00340275	0.0939805
ENSMUSG00000004748	Mtfp1	392.174	-0.684733	0.234139	-2.92447	0.00345045	0.0948457
ENSMUSG00000020251	Glt8d2	492.526	-0.371137	0.126927	-2.92401	0.00345556	0.0948457
ENSMUSG00000006057	Atp5g1	4586.62	-0.583232	0.199563	-2.92255	0.00347173	0.0950743
ENSMUSG00000012123	Crybg2	14.8803	4.38138	1.49938	2.92213	0.00347649	0.0950743
ENSMUSG00000020544	Cox11	227.208	-0.528337	0.180901	-2.92059	0.00349371	0.0953725
ENSMUSG00000028234	Rps20	5175.3	0.448145	0.153537	2.9188	0.00351377	0.0957472
ENSMUSG00000021456	Fbp2	89.7621	-1.87741	0.643573	-2.91717	0.00353225	0.0960773
ENSMUSG00000018474	Chd3	2420.55	0.337003	0.115596	2.91536	0.00355284	0.0964634
ENSMUSG00000051159	Cited1	33.6745	1.52222	0.522404	2.91388	0.00356969	0.0967469
ENSMUSG00000058806	Col13a1	706.405	0.408396	0.140214	2.91266	0.00358369	0.0969522
ENSMUSG00000058897	Col25a1	23.7445	1.76774	0.607113	2.91172	0.00359446	0.0970697
ENSMUSG00000063727	Tnfrsf11b	224.735	0.924934	0.317727	2.9111	0.0036016	0.0970889
ENSMUSG00000022479	Vdr	32.295	1.90388	0.654158	2.91044	0.00360924	0.0971214
ENSMUSG00000022150	Dab2	3362.67	-0.373217	0.128378	-2.90717	0.00364711	0.0979657
ENSMUSG00000079110	Capn3	556.231	-0.902003	0.310341	-2.90649	0.00365513	0.0980068
ENSMUSG00000022218	Tgm1	31.3572	2.82135	0.97165	2.90367	0.00368813	0.098636
ENSMUSG00000030249	Abcc9	2175.88	-0.478022	0.164675	-2.90282	0.0036982	0.098636
ENSMUSG00000030652	Coq7	701.241	-0.498061	0.171566	-2.90303	0.00369568	0.098636
ENSMUSG00000079055	Slc8a3	356.681	-0.725684	0.25017	-2.90076	0.00372258	0.0991112
ENSMUSG00000034327	Kctd9	1000.39	-0.336839	0.116145	-2.90016	0.00372969	0.0991256
ENSMUSG00000032243	Itga11	1207.58	0.396171	0.136631	2.89956	0.00373684	0.0991411
ENSMUSG00000036106	Prr5	393.677	-0.563839	0.19458	-2.89772	0.00375885	0.0995502
ENSMUSG00000020340	Cyfip2	200.354	-0.677099	0.233727	-2.89696	0.00376793	0.0996159
ENSMUSG00000054136	Adm2	41.5493	1.93977	0.67001	2.89513	0.00378999	0.100024
ENSMUSG00000004233	Wars2	129.89	-0.636262	0.219992	-2.8922	0.00382555	0.100324
ENSMUSG00000025969	Nrp2	1744.63	0.41775	0.144424	2.89252	0.00382162	0.100324
ENSMUSG00000028369	Svep1	1438.58	0.404151	0.139788	2.89117	0.00383806	0.100324
ENSMUSG00000039153	Runx2	115.3	0.832334	0.287913	2.89092	0.00384118	0.100324
ENSMUSG00000086596	Susd5	149.441	-1.14806	0.396854	-2.89291	0.00381687	0.100324
ENSMUSG00000093738	AI606473	49.8515	0.878953	0.30404	2.89091	0.00384123	0.100324
ENSMUSG00000042359	Osbpl6	165.973	-0.689229	0.238545	-2.8893	0.00386096	0.100665
ENSMUSG00000029228	Lnx1	185.375	-0.56094	0.194401	-2.88548	0.00390817	0.10172
ENSMUSG00000034708	Grn	5362.49	0.326177	0.113084	2.88437	0.00392195	0.101903
ENSMUSG00000022639	Dubr	235.048	0.81206	0.281591	2.88383	0.00392874	0.101904
ENSMUSG00000027102	Hoxd8	910.813	0.377182	0.130843	2.8827	0.0039428	0.102094
ENSMUSG00000008601	Rab25	15.5029	4.11966	1.42944	2.882	0.00395154	0.102145
ENSMUSG00000018378	Cuedc1	3269.84	-0.338398	0.117526	-2.87935	0.00398496	0.102833
ENSMUSG00000026956	Uap1l1	831.487	0.537288	0.186793	2.87638	0.00402266	0.103628
ENSMUSG00000038900	Rpl12	6124.54	0.437908	0.152293	2.87543	0.00403475	0.103763
ENSMUSG00000042210	Abhd14a	375.179	0.472809	0.164541	2.8735	0.00405954	0.104196
ENSMUSG00000050860	Phospho1	299.741	-0.659974	0.229713	-2.87304	0.00406542	0.104196
ENSMUSG00000022305	Lrp12	347.447	0.463982	0.161613	2.87094	0.00409256	0.104714
ENSMUSG00000050777	Tmem37	160.215	-0.818587	0.285194	-2.87028	0.00410105	0.104754
ENSMUSG00000023011	Faim2	445.362	0.539474	0.187998	2.86957	0.00411031	0.104813
ENSMUSG00000027763	Mbnl1	8047.26	-0.279926	0.0976291	-2.86724	0.00414066	0.105409
ENSMUSG00000028399	Ptprd	1350.72	0.417947	0.14582	2.86618	0.00415463	0.105409
ENSMUSG00000031633	Slc25a4	27272.4	-0.593056	0.206904	-2.86634	0.00415248	0.105409
ENSMUSG00000000056	Narf	1351.75	-0.443162	0.15504	-2.85837	0.00425823	0.107856
ENSMUSG00000096606	Tpbgl	128.511	-1.2485	0.437042	-2.85669	0.00428081	0.108246
ENSMUSG00000030110	Ret	734.364	-0.448817	0.1572	-2.85507	0.00430272	0.108619
ENSMUSG00000022860	Chodl	641.911	0.855443	0.300025	2.85124	0.0043549	0.109752
ENSMUSG00000075700	Selenot	2692.17	-0.327816	0.115005	-2.85046	0.00436566	0.109807
ENSMUSG00000109814	Gm45847	28.9064	1.46463	0.5139	2.85002	0.0043716	0.109807
ENSMUSG00000031565	Fgfr1	5446.49	0.30222	0.106087	2.84879	0.00438852	0.110048
ENSMUSG00000027447	Cst3	46430.7	0.425438	0.149445	2.84679	0.00441626	0.110257
ENSMUSG00000033400	Agl	3240.65	-0.875607	0.307653	-2.84608	0.00442606	0.110257
ENSMUSG00000034607	Pof1b	12.6212	4.11186	1.44442	2.84672	0.00441718	0.110257
ENSMUSG00000043342	Hoxd9	641.879	0.386961	0.135956	2.84622	0.0044241	0.110257
ENSMUSG00000059552	Trp53	589.891	0.400388	0.140793	2.84381	0.0044578	0.110865
ENSMUSG00000030337	Vamp1	370.683	-0.429093	0.150969	-2.84226	0.00447951	0.111131
ENSMUSG00000038764	Ptpn3	1855.01	-0.497931	0.175205	-2.84199	0.00448324	0.111131
ENSMUSG00000056919	Cep162	148.909	0.643108	0.226894	2.8344	0.00459124	0.113622
ENSMUSG00000020048	Hsp90b1	7955.24	0.351158	0.123927	2.83359	0.0046028	0.113721
ENSMUSG00000049288	Lix1l	2172.15	0.306132	0.108106	2.83177	0.00462909	0.114184
ENSMUSG00000024642	Tle4	380.23	-0.383463	0.135647	-2.82692	0.00469988	0.115553
ENSMUSG00000040280	Ndufa4l2	6420.1	-0.498228	0.176231	-2.82713	0.00469679	0.115553
ENSMUSG00000018537	Pcgf2	443.637	0.520982	0.184435	2.82475	0.00473175	0.115959
ENSMUSG00000048277	Syngr2	1474.35	-0.489624	0.173318	-2.82501	0.00472796	0.115959
ENSMUSG00000042766	Trim46	74.1993	0.750413	0.265812	2.8231	0.0047562	0.116369
ENSMUSG00000028226	Mmp16	257.975	0.438459	0.155387	2.82172	0.00477667	0.11668
ENSMUSG00000040205	Cuzd1	14.4093	-1.84849	0.655364	-2.82056	0.00479405	0.116727
ENSMUSG00000051910	Sox6	730.292	-0.579797	0.205524	-2.82107	0.00478638	0.116727
ENSMUSG00000030695	Aldoa	43238.1	-0.79997	0.28402	-2.8166	0.00485355	0.117986
ENSMUSG00000045975	C2cd2	691.242	-0.639705	0.22717	-2.81598	0.00486289	0.118023
ENSMUSG00000021906	Oxnad1	293.706	-0.596603	0.211905	-2.81543	0.00487115	0.118034
ENSMUSG00000042073	Abhd14b	313.673	0.52123	0.185508	2.80975	0.00495801	0.119754
ENSMUSG00000044951	Mylk4	1805.79	-2.69482	0.959053	-2.80988	0.00495606	0.119754
ENSMUSG00000032786	Alas1	1592.76	-0.408005	0.145328	-2.80747	0.00499321	0.120411
ENSMUSG00000038648	Creb3l2	1694.93	0.375284	0.134017	2.80028	0.00510583	0.122931
ENSMUSG00000044792	Isca1	2043.59	-0.460283	0.164572	-2.79685	0.00516029	0.124044
ENSMUSG00000032014	Oaf	1724.53	0.428552	0.153354	2.79453	0.00519747	0.124739
ENSMUSG00000039910	Cited2	1214.81	-0.392695	0.140637	-2.79226	0.00523418	0.125421
ENSMUSG00000032750	Gab3	49.1611	0.989225	0.354847	2.78775	0.00530754	0.126977
ENSMUSG00000028664	Ephb2	186.293	0.753274	0.270444	2.78533	0.00534736	0.127728
ENSMUSG00000015354	Pcolce2	5305.24	-0.378908	0.136096	-2.78412	0.00536734	0.128002
ENSMUSG00000008682	Rpl10	7700.08	0.311961	0.112164	2.78129	0.00541431	0.128311
ENSMUSG00000027333	Smox	945.297	-1.48005	0.532025	-2.78192	0.0054039	0.128311
ENSMUSG00000029554	Mad1l1	322.095	0.467344	0.168018	2.7815	0.00541078	0.128311
ENSMUSG00000032561	Acpp	29.0648	2.75516	0.990168	2.78252	0.00539386	0.128311
ENSMUSG00000001027	Scn4a	1402.57	-0.803741	0.289389	-2.77737	0.00548004	0.129666
ENSMUSG00000022215	Fitm1	1365.68	-0.693164	0.24969	-2.7761	0.00550149	0.129969
ENSMUSG00000026895	Ndufa8	2258.24	-0.430122	0.155144	-2.7724	0.00556446	0.131252
ENSMUSG00000061816	Myl1	27209.6	-0.912153	0.329123	-2.77147	0.00558044	0.131423
ENSMUSG00000049422	Chchd10	2342.98	-0.640171	0.231295	-2.76777	0.00564415	0.132717
ENSMUSG00000026938	Fcna	80.6154	-0.741831	0.268346	-2.76445	0.00570185	0.133865
ENSMUSG00000063694	Cycs	2989.56	-0.545334	0.197391	-2.76271	0.00573232	0.134371
ENSMUSG00000037905	Bri3bp	314.855	0.402489	0.145869	2.75924	0.00579351	0.135595
ENSMUSG00000027777	Schip1	193.822	-0.658635	0.239016	-2.75561	0.0058583	0.136899
ENSMUSG00000045761	Togaram2	201.31	0.901588	0.327284	2.75475	0.00587366	0.137046
ENSMUSG00000042680	Garem1	191.617	0.583312	0.211791	2.75419	0.00588384	0.137072
ENSMUSG00000005628	Tmod4	1615.37	-0.870495	0.316863	-2.74723	0.0060101	0.139436
ENSMUSG00000025538	Sumf2	250.771	0.513345	0.186888	2.7468	0.006018	0.139436
ENSMUSG00000038880	Mrps34	644.302	-0.368625	0.134233	-2.74616	0.00602968	0.139436
ENSMUSG00000045763	Basp1	310.85	0.787102	0.286629	2.74606	0.00603153	0.139436
ENSMUSG00000048402	Gli2	306.311	0.495264	0.180343	2.74624	0.00602834	0.139436
ENSMUSG00000025352	Gdf11	299.362	-0.857103	0.312311	-2.74439	0.00606231	0.139934
ENSMUSG00000028763	Hspg2	24585.3	0.325909	0.118863	2.74187	0.00610897	0.140796
ENSMUSG00000046413	Irx3os	40.3536	-1.45909	0.533056	-2.73723	0.00619597	0.142583
ENSMUSG00000020681	Ace	2689.46	-0.352445	0.128816	-2.73604	0.00621826	0.142878
ENSMUSG00000038000	Acd	294.842	0.460122	0.168317	2.73366	0.00626338	0.143696
ENSMUSG00000027420	Bfsp1	214.228	-0.667333	0.244274	-2.7319	0.00629705	0.144221
ENSMUSG00000050910	Cdr2l	885.538	-0.505839	0.18519	-2.73146	0.00630537	0.144221
ENSMUSG00000089715	Cbx6	4013.22	0.384941	0.141058	2.72895	0.00635357	0.145104
ENSMUSG00000052430	Bmpr1b	767.827	-0.410284	0.150557	-2.7251	0.0064282	0.146586
ENSMUSG00000005882	Uqcc1	806.245	-0.487836	0.179177	-2.72264	0.00647621	0.147458
ENSMUSG00000034040	Galnt17	928.303	0.30144	0.11077	2.72131	0.00650246	0.147611
ENSMUSG00000068122	Agtr2	85.7707	1.16754	0.429036	2.72131	0.00650243	0.147611
ENSMUSG00000084929	Foxo6os	494.838	-0.658911	0.242241	-2.72007	0.00652678	0.14794
ENSMUSG00000030505	Prmt3	278.069	0.41507	0.152726	2.71775	0.00657283	0.148095
ENSMUSG00000034127	Tspan8	77.1961	-1.81848	0.669106	-2.71777	0.00657235	0.148095
ENSMUSG00000044345	Marveld1	4587.97	-0.493299	0.181453	-2.7186	0.00655597	0.148095
ENSMUSG00000047875	Gpr157	259.024	-0.72227	0.265706	-2.71831	0.00656169	0.148095
ENSMUSG00000054000	Tusc1	188.345	0.552591	0.203376	2.71709	0.00658585	0.148167
ENSMUSG00000020475	Pgam2	7962.87	-0.839155	0.3091	-2.71483	0.00663093	0.148493
ENSMUSG00000020483	Dynll2	4239.63	-0.432372	0.159288	-2.7144	0.00663969	0.148493
ENSMUSG00000024953	Prdx5	2604.36	-0.351662	0.129507	-2.7154	0.00661957	0.148493
ENSMUSG00000050368	Hoxd10	138.698	0.546763	0.20136	2.71536	0.00662044	0.148493
ENSMUSG00000023336	Wfdc1	1318.35	-0.280917	0.103532	-2.71333	0.006661	0.14856
ENSMUSG00000028926	Cdk14	988.803	0.332743	0.122636	2.71327	0.00666236	0.14856
ENSMUSG00000039704	Lmbrd2	167.144	-0.61901	0.2283	-2.71138	0.00670029	0.149185
ENSMUSG00000037166	Ppp1r14a	316.518	-0.800863	0.295474	-2.71044	0.00671948	0.149392
ENSMUSG00000021665	Hexb	1175.16	0.429532	0.158566	2.70885	0.00675178	0.14989
ENSMUSG00000061758	Akr1b10	235.528	-0.599079	0.221257	-2.70762	0.00677683	0.150225
ENSMUSG00000031791	Tmem38a	7558.01	-0.725183	0.268044	-2.70547	0.00682087	0.150538
ENSMUSG00000037206	Islr	1601.55	0.352687	0.130338	2.70594	0.00681115	0.150538
ENSMUSG00000100599	1700120C14Rik	79.9258	-1.00713	0.372214	-2.70579	0.00681431	0.150538
ENSMUSG00000017817	Jph2	4728.41	-0.708832	0.262077	-2.70467	0.00683725	0.150679
ENSMUSG00000030092	Cntn6	19.49	-1.49591	0.553349	-2.70339	0.00686369	0.151041
ENSMUSG00000028207	Asph	2592.92	-0.484322	0.179211	-2.70252	0.00688165	0.151216
ENSMUSG00000032262	Elovl4	65.7019	0.791839	0.293124	2.70139	0.00690513	0.151511
ENSMUSG00000000530	Acvrl1	1265.51	-0.424085	0.157189	-2.69794	0.00697706	0.152509
ENSMUSG00000005474	Myl10	21.8311	2.78427	1.0317	2.69871	0.00696088	0.152509
ENSMUSG00000021981	Cab39l	822.362	-0.388672	0.144073	-2.69775	0.00698092	0.152509
ENSMUSG00000034994	Eef2	34209.3	0.404504	0.149972	2.6972	0.00699247	0.152541
ENSMUSG00000019718	L3hypdh	231.541	-0.856252	0.317604	-2.69597	0.00701834	0.152884
ENSMUSG00000032925	Itgbl1	16436.8	0.360426	0.133785	2.69407	0.00705861	0.152928
ENSMUSG00000034981	Parm1	244.616	-0.711404	0.263974	-2.69498	0.00703932	0.152928
ENSMUSG00000039126	Prune2	840.884	-0.653055	0.242415	-2.69396	0.00706089	0.152928
ENSMUSG00000058908	Pla2g2a	15.5735	-1.78745	0.663483	-2.69405	0.00705901	0.152928
ENSMUSG00000033207	Mamdc2	545.566	-0.482082	0.17908	-2.69199	0.00710261	0.153612
ENSMUSG00000024099	Ndufv2	2591.04	-0.464925	0.172844	-2.68985	0.00714831	0.154379
ENSMUSG00000022261	Sdc2	2908.66	0.580339	0.216197	2.68431	0.00726796	0.156739
ENSMUSG00000028495	Rps6	4686.1	0.375517	0.140043	2.68143	0.0073308	0.157868
ENSMUSG00000022883	Robo1	384.125	0.426002	0.158977	2.67964	0.00737024	0.158266
ENSMUSG00000031274	Col4a5	360.485	-0.647943	0.241786	-2.67982	0.00736619	0.158266
ENSMUSG00000028479	Gne	924.705	-0.391052	0.146195	-2.67486	0.00747607	0.160311
ENSMUSG00000026603	Smyd2	555.872	-0.560112	0.209496	-2.67361	0.00750389	0.160679
ENSMUSG00000016940	Kctd2	602.651	0.404104	0.151221	2.67228	0.00753372	0.161089
ENSMUSG00000035637	Grhpr	456.395	-0.430558	0.161244	-2.67023	0.00758001	0.16185
ENSMUSG00000023944	Hsp90ab1	18844.9	0.332642	0.124625	2.66915	0.0076043	0.162048
ENSMUSG00000034282	Evpl	55.1263	1.93555	0.725234	2.66887	0.00761077	0.162048
ENSMUSG00000021281	Tnfaip2	477.34	-0.695068	0.260618	-2.667	0.00765324	0.162723
ENSMUSG00000074170	Plekhf1	570.2	0.425459	0.159705	2.66403	0.00772114	0.163936
ENSMUSG00000043336	Filip1l	1201.91	-0.412642	0.155139	-2.65983	0.00781809	0.165761
ENSMUSG00000050700	Emilin3	213.483	-0.58129	0.218788	-2.65686	0.00788711	0.16699
ENSMUSG00000056880	Gadl1	298.528	-1.11234	0.41885	-2.6557	0.00791438	0.167333
ENSMUSG00000022594	Lynx1	2971.06	-0.739611	0.278648	-2.65429	0.00794758	0.1678
ENSMUSG00000045498	Pcdhb3	41.8104	0.9406	0.354462	2.6536	0.00796385	0.167908
ENSMUSG00000026568	Mpc2	2012.02	-0.446781	0.168426	-2.65268	0.00798561	0.168132
ENSMUSG00000032578	Cish	142.763	-1.33363	0.502892	-2.65193	0.00800328	0.16827
ENSMUSG00000037904	Ankrd9	372.178	-0.901154	0.340215	-2.64878	0.00807822	0.169609
ENSMUSG00000024349	Tmem173	328.212	0.507553	0.191674	2.64799	0.00809712	0.16977
ENSMUSG00000021303	Gng4	42.2531	1.26833	0.479209	2.64671	0.00812785	0.170178
ENSMUSG00000010277	2610507B11Rik	5192.59	-0.321942	0.121672	-2.64598	0.00814537	0.170268
ENSMUSG00000027248	Pdia3	7985.05	0.316505	0.119677	2.64466	0.00817727	0.170268
ENSMUSG00000027366	Sppl2a	2254.41	-0.313009	0.118352	-2.64472	0.00817583	0.170268
ENSMUSG00000047419	Cmya5	8112.55	-0.690671	0.261116	-2.64508	0.00816728	0.170268
ENSMUSG00000036570	Fxyd1	2876.53	-0.426121	0.161316	-2.64153	0.00825329	0.171614
ENSMUSG00000020435	Osbp2	147.803	0.765575	0.29018	2.63827	0.00833295	0.172609
ENSMUSG00000022110	Sucla2	3479.49	-0.536266	0.203272	-2.63817	0.00833547	0.172609
ENSMUSG00000054072	Iigp1	382.044	-0.985616	0.373544	-2.63856	0.008326	0.172609
ENSMUSG00000098557	Kctd12	1654.97	0.333929	0.126627	2.6371	0.00836175	0.172916
ENSMUSG00000027642	Rpn2	4951.09	0.317641	0.120557	2.63477	0.00841947	0.173161
ENSMUSG00000032023	Jhy	16.2188	-2.55521	0.969713	-2.63501	0.00841341	0.173161
ENSMUSG00000051379	Flrt3	109.026	0.702283	0.266407	2.63613	0.00838568	0.173161
ENSMUSG00000052516	Robo2	117.499	0.656966	0.249339	2.63483	0.00841788	0.173161
ENSMUSG00000020080	Hkdc1	14.3781	-1.73868	0.660493	-2.6324	0.00847849	0.173665
ENSMUSG00000022564	Grina	2244.42	0.384906	0.146173	2.63322	0.00845804	0.173665
ENSMUSG00000074218	Cox7a1	1622.25	-0.571164	0.216972	-2.63243	0.00847761	0.173665
ENSMUSG00000027318	Adam33	259.625	0.500488	0.190384	2.62884	0.00856774	0.175095
ENSMUSG00000030399	Ckm	54174.9	-0.859448	0.326949	-2.62869	0.00857147	0.175095
ENSMUSG00000068196	Col8a1	3518.77	0.585507	0.22285	2.62736	0.00860491	0.17554
ENSMUSG00000038506	Dcun1d2	617.138	-0.400105	0.152326	-2.62663	0.00862344	0.175575
ENSMUSG00000047407	Tgif1	197.441	0.557961	0.212445	2.62638	0.00862986	0.175575
ENSMUSG00000036473	Tbc1d24	516.385	0.330224	0.126	2.62082	0.00877188	0.178224
ENSMUSG00000001666	Ddt	332.711	0.419315	0.160026	2.62029	0.00878544	0.178259
ENSMUSG00000060843	Ctnna3	61.8372	-0.739379	0.282233	-2.61975	0.00879954	0.178306
ENSMUSG00000093674	Rpl41	7757.94	0.463465	0.176982	2.61871	0.00882627	0.178608
ENSMUSG00000000776	Polr3d	693.35	-0.366201	0.139921	-2.61719	0.00886572	0.179166
ENSMUSG00000020263	Appl2	975.93	0.371738	0.142096	2.6161	0.0088941	0.179499
ENSMUSG00000021868	Ppif	295.782	-0.496974	0.190025	-2.61531	0.00891473	0.179628
ENSMUSG00000063713	Klk1b24	15.3794	-1.70018	0.650181	-2.61494	0.00892428	0.179628
ENSMUSG00000032988	Slc16a8	95.7069	0.729783	0.279204	2.6138	0.00895419	0.17999
ENSMUSG00000013921	Clip3	612.601	0.419284	0.160575	2.61114	0.00902397	0.180911
ENSMUSG00000029432	Nipsnap2	5069.62	-0.518456	0.198528	-2.6115	0.00901459	0.180911
ENSMUSG00000017009	Sdc4	1761.89	-0.536163	0.205443	-2.60979	0.00905981	0.181388
ENSMUSG00000018574	Acadvl	3164.98	-0.503958	0.19342	-2.60552	0.00917359	0.183423
ENSMUSG00000032532	Cck	32.6286	-1.09295	0.419759	-2.60376	0.00922062	0.183634
ENSMUSG00000033439	Trmt13	93.9016	-0.622483	0.239037	-2.60413	0.00921088	0.183634
ENSMUSG00000076432	Ywhaq	1688.52	-0.297786	0.114351	-2.60413	0.00921086	0.183634
ENSMUSG00000022123	Scel	21.092	1.78654	0.686775	2.60135	0.00928572	0.184687
ENSMUSG00000001655	Hoxc13	28.2566	2.89195	1.11198	2.60072	0.00930292	0.184785
ENSMUSG00000047976	Kcna1	142.525	-0.983696	0.378424	-2.59945	0.00933722	0.185223
ENSMUSG00000040717	Il17rd	676.231	0.452181	0.174034	2.59824	0.00937041	0.185394
ENSMUSG00000072875	Gpr27	336.55	0.409525	0.157611	2.59834	0.00936766	0.185394
ENSMUSG00000046844	Vat1l	314.984	1.08437	0.417688	2.59613	0.00942801	0.18629
ENSMUSG00000020427	Igfbp3	2017.43	0.398432	0.153508	2.59552	0.00944474	0.186376
ENSMUSG00000025968	Ndufs1	3953.62	-0.466144	0.179903	-2.59108	0.0095675	0.188306
ENSMUSG00000075033	Nxpe3	60.289	-0.740279	0.285697	-2.59113	0.00956616	0.188306
ENSMUSG00000023047	Amhr2	113.705	-0.741989	0.286527	-2.58959	0.00960899	0.188877
ENSMUSG00000002010	Idh3g	3069.98	-0.422224	0.163078	-2.58909	0.00962287	0.188904
ENSMUSG00000015619	Gata3	30.0077	2.28618	0.883253	2.58836	0.00964333	0.189059
ENSMUSG00000031626	Sorbs2	739.125	-0.813383	0.314605	-2.58541	0.00972639	0.190441
ENSMUSG00000021260	Hhipl1	98.3638	0.933804	0.361652	2.58205	0.00982152	0.192054
ENSMUSG00000043716	Rpl7	7122.07	0.324868	0.125884	2.58068	0.00986048	0.192566
ENSMUSG00000021388	Aspn	3424.9	0.672413	0.260701	2.57925	0.00990149	0.192868
ENSMUSG00000031382	Asb11	174.349	-0.997771	0.386799	-2.57956	0.00989275	0.192868
ENSMUSG00000006651	Aplp1	213.17	0.711434	0.275972	2.57792	0.00993965	0.192883
ENSMUSG00000032324	Tspan3	6222.58	-0.319702	0.124017	-2.57789	0.00994057	0.192883
ENSMUSG00000074934	Grem1	335.871	-2.05533	0.797156	-2.57833	0.00992787	0.192883
ENSMUSG00000031320	Rps4x	8598.96	0.374262	0.145317	2.57549	0.0100097	0.193975
ENSMUSG00000025534	Gusb	997.174	0.326013	0.126651	2.5741	0.0100502	0.19402
ENSMUSG00000032518	Rpsa	11280.1	0.400891	0.155734	2.57421	0.0100469	0.19402
ENSMUSG00000063594	Gng8	26.7482	1.17156	0.455137	2.57408	0.0100506	0.19402
ENSMUSG00000038742	Angptl6	56.2368	0.946157	0.36771	2.57311	0.010079	0.19432
ENSMUSG00000015709	Arnt2	133.911	-1.04547	0.407011	-2.56866	0.0102093	0.194625
ENSMUSG00000020022	Ndufa12	1749.42	-0.562301	0.218898	-2.56878	0.0102057	0.194625
ENSMUSG00000020634	Ubxn2a	988.308	-0.521433	0.202886	-2.57008	0.0101676	0.194625
ENSMUSG00000026604	Ptpn14	1630.72	-0.343872	0.133722	-2.57154	0.0101247	0.194625
ENSMUSG00000028229	Rmdn1	272.432	-0.466687	0.181612	-2.56969	0.0101789	0.194625
ENSMUSG00000031772	Cntnap4	41.7671	0.859887	0.334661	2.56942	0.0101868	0.194625
ENSMUSG00000032366	Tpm1	58782.1	-0.740092	0.287738	-2.5721	0.0101083	0.194625
ENSMUSG00000054162	Spock3	150.791	0.761713	0.296547	2.56861	0.0102108	0.194625
ENSMUSG00000058966	Fam57b	150.914	-0.908349	0.353431	-2.57009	0.0101673	0.194625
ENSMUSG00000031782	Coq9	2822.59	-0.47683	0.185743	-2.56715	0.0102537	0.195196
ENSMUSG00000005089	Slc1a2	115.562	0.568695	0.221916	2.56266	0.0103873	0.197489
ENSMUSG00000048939	Atp13a5	59.455	-1.01783	0.39734	-2.56161	0.0104187	0.197746
ENSMUSG00000051107	NA	173.226	-0.827875	0.32322	-2.56134	0.010427	0.197746
ENSMUSG00000024327	Slc39a7	1002.21	-0.301906	0.117916	-2.56034	0.0104569	0.198029
ENSMUSG00000032076	Cadm1	490.858	-0.55153	0.215444	-2.55997	0.0104682	0.198029
ENSMUSG00000038526	Car14	203.326	-0.826022	0.322875	-2.55834	0.0105174	0.198712
ENSMUSG00000053436	Mapk14	1630.23	-0.320627	0.125462	-2.55557	0.0106015	0.20005
ENSMUSG00000023020	Cox14	1136.92	-0.413196	0.161719	-2.55502	0.0106181	0.200114
ENSMUSG00000001482	Def8	828.92	-0.279693	0.109653	-2.55072	0.0107501	0.20201
ENSMUSG00000041216	Clvs1	32.4929	-1.34222	0.526271	-2.55043	0.0107589	0.20201
ENSMUSG00000046345	Smco1	106.273	-1.14578	0.449135	-2.55108	0.0107389	0.20201
ENSMUSG00000022842	Ece2	136.269	0.553508	0.217104	2.54951	0.0107876	0.202273
ENSMUSG00000026994	Galnt3	68.7348	0.707306	0.277471	2.54911	0.0107997	0.202273
ENSMUSG00000052373	Mpp3	97.5876	-0.869118	0.34109	-2.54806	0.0108322	0.202631
ENSMUSG00000032047	Acat1	3424.15	-0.348711	0.136892	-2.54734	0.0108548	0.202802
ENSMUSG00000002416	Ndufb2	1068.27	-0.444983	0.17484	-2.54508	0.0109252	0.203865
ENSMUSG00000030515	Tarsl2	640.772	-0.622625	0.244819	-2.54321	0.010984	0.204709
ENSMUSG00000021494	Ddx41	461.964	0.374252	0.147387	2.53924	0.0111093	0.206789
ENSMUSG00000061410	Zcchc14	1775.9	0.333924	0.131547	2.53844	0.0111349	0.20701
ENSMUSG00000000740	Rpl13	8622.88	0.368678	0.145353	2.53642	0.0111992	0.207429
ENSMUSG00000020572	Nampt	1378.51	-0.32016	0.126209	-2.53673	0.0111892	0.207429
ENSMUSG00000022371	Col14a1	2943.15	0.500158	0.197128	2.53722	0.0111736	0.207429
ENSMUSG00000052539	Magi3	524.354	-0.486933	0.192008	-2.53601	0.0112124	0.207429
ENSMUSG00000026670	Uap1	1839.45	-0.289166	0.114197	-2.53217	0.0113359	0.207924
ENSMUSG00000027895	Kcnc4	439.016	-1.9479	0.768648	-2.53419	0.0112706	0.207924
ENSMUSG00000038156	Spon1	1411.32	-0.384005	0.151563	-2.53364	0.0112885	0.207924
ENSMUSG00000038239	Hrc	4597.66	-0.63169	0.249512	-2.5317	0.0113512	0.207924
ENSMUSG00000049001	Ndnf	166.214	0.66514	0.262553	2.53336	0.0112976	0.207924
ENSMUSG00000052974	Cyp2f2	240.039	0.873722	0.344866	2.53352	0.0112925	0.207924
ENSMUSG00000067629	Syngap1	261.854	0.482727	0.190701	2.53133	0.0113631	0.207924
ENSMUSG00000087530	Gm15533	25.0491	-1.25599	0.495865	-2.53293	0.0113113	0.207924
ENSMUSG00000107624	Gm44005	23.6476	1.22347	0.483329	2.53134	0.0113628	0.207924
ENSMUSG00000086219	Srrm4os	18.9358	-1.92407	0.76054	-2.52987	0.0114106	0.20854
ENSMUSG00000002769	Gnmt	24.0597	1.85115	0.73339	2.5241	0.0115994	0.211734
ENSMUSG00000019866	Crybg1	172.954	1.08651	0.430586	2.52333	0.011625	0.211946
ENSMUSG00000006378	Gcat	146.261	0.683752	0.271053	2.52257	0.0116499	0.212038
ENSMUSG00000062580	Timm17a	1521.4	-0.430166	0.170543	-2.52233	0.0116582	0.212038
ENSMUSG00000022441	Efcab6	39.2463	-1.10223	0.437086	-2.52177	0.0116764	0.212115
ENSMUSG00000029201	Ugdh	1640.52	-0.30005	0.119113	-2.51904	0.0117675	0.213231
ENSMUSG00000037606	Osbpl5	1492.14	0.259406	0.102993	2.51866	0.0117802	0.213231
ENSMUSG00000046573	Lyrm4	105.553	0.573304	0.22759	2.51902	0.0117683	0.213231
ENSMUSG00000024640	Psat1	779.067	0.548479	0.217812	2.51813	0.0117978	0.213294
ENSMUSG00000044857	Lemd2	1148.27	0.308458	0.122517	2.51767	0.0118135	0.213322
ENSMUSG00000028463	Car9	66.7714	-0.827805	0.328868	-2.51714	0.0118313	0.213388
ENSMUSG00000019997	Ctgf	14572.1	0.771189	0.30649	2.5162	0.0118629	0.213702
ENSMUSG00000061723	Tnnt3	55559.8	-0.783997	0.31165	-2.51564	0.0118817	0.213786
ENSMUSG00000037185	Krt80	163.737	0.749349	0.298083	2.5139	0.0119405	0.214589
ENSMUSG00000022122	Ednrb	439.708	-0.503159	0.200192	-2.51338	0.011958	0.214647
ENSMUSG00000090439	Gm17455	379.805	-0.449895	0.17905	-2.51268	0.011982	0.214821
ENSMUSG00000055912	Tmem150a	339.681	0.452186	0.179996	2.51221	0.0119979	0.214852
ENSMUSG00000037151	Lrrc20	1079.31	-0.581362	0.231504	-2.51124	0.0120308	0.214991
ENSMUSG00000039431	Mtmr7	47.6237	0.801742	0.319314	2.51083	0.0120448	0.214991
ENSMUSG00000057596	Trim30d	26.9683	-2.23003	0.888201	-2.51072	0.0120484	0.214991
ENSMUSG00000022225	Cma1	141.982	0.796426	0.317669	2.50709	0.0121729	0.215894
ENSMUSG00000022551	Cyc1	4648.12	-0.452767	0.18061	-2.50688	0.0121802	0.215894
ENSMUSG00000025362	Rps26	2977.48	0.335541	0.133777	2.5082	0.0121347	0.215894
ENSMUSG00000042515	Mum1l1	88.5207	-0.715762	0.285497	-2.50708	0.0121734	0.215894
ENSMUSG00000061859	Patj	204.048	0.479204	0.191166	2.50675	0.0121848	0.215894
ENSMUSG00000072235	Tuba1a	4803.84	-0.387896	0.154643	-2.50834	0.01213	0.215894
ENSMUSG00000001983	Taco1	360.061	-0.52098	0.207919	-2.50569	0.0122214	0.216274
ENSMUSG00000028906	Epb41	967.76	-0.294141	0.117408	-2.5053	0.0122349	0.216274
ENSMUSG00000036534	Slc38a7	394.971	0.353996	0.141325	2.50483	0.0122511	0.216307
ENSMUSG00000061068	Mcpt4	236.513	0.669753	0.267536	2.50341	0.0123002	0.21692
ENSMUSG00000087253	Gm12043	74.4263	-0.761711	0.304334	-2.50287	0.0123189	0.216997
ENSMUSG00000005087	Cd44	1433.77	0.357793	0.14298	2.50239	0.0123358	0.217041
ENSMUSG00000030647	Ndufc2	1476.48	-0.425566	0.170092	-2.50197	0.0123503	0.217044
ENSMUSG00000040133	Gpr176	64.0855	0.876889	0.350788	2.49977	0.0124274	0.218144
ENSMUSG00000042821	Snai1	279.395	-0.552043	0.220951	-2.49849	0.0124725	0.218682
ENSMUSG00000104713	Gbp6	41.4506	-0.878072	0.351565	-2.49761	0.0125035	0.218971
ENSMUSG00000055926	Gm14137	19.7294	2.29244	0.918118	2.49689	0.0125289	0.219161
ENSMUSG00000032041	Tirap	306.561	-0.57516	0.230491	-2.49537	0.0125826	0.219592
ENSMUSG00000033502	Cdc14a	238.122	-0.583936	0.233976	-2.49571	0.0125705	0.219592
ENSMUSG00000026147	Col9a1	35.0199	1.13497	0.454905	2.49495	0.0125974	0.219596
ENSMUSG00000039199	Zdhhc1	487.29	0.340131	0.136593	2.4901	0.0127707	0.222361
ENSMUSG00000038459	Abhd17c	261.963	0.430441	0.172934	2.48906	0.0128083	0.222758
ENSMUSG00000061436	Hipk2	662.511	-0.490578	0.19742	-2.48494	0.0129572	0.224924
ENSMUSG00000074259	Gramd2	146.992	-0.740435	0.297987	-2.48479	0.0129626	0.224924
ENSMUSG00000020149	Rab1	4619.29	-0.262656	0.105731	-2.48418	0.0129849	0.225051
ENSMUSG00000024955	Esrra	1580.31	-0.428322	0.17248	-2.48332	0.0130163	0.225257
ENSMUSG00000029368	Alb	55.117	0.955649	0.384876	2.48301	0.0130279	0.225257
ENSMUSG00000106237	Gm8066	26.3052	1.22666	0.494095	2.48263	0.0130415	0.225257
ENSMUSG00000047139	Cd24a	528.208	-0.402946	0.16234	-2.48212	0.0130605	0.225327
ENSMUSG00000014846	Tppp3	3023.63	0.504491	0.203358	2.4808	0.0131087	0.225815
ENSMUSG00000030407	Qpctl	202.992	0.436725	0.176148	2.47931	0.0131636	0.225815
ENSMUSG00000032064	Dixdc1	422.576	-0.499029	0.201201	-2.48025	0.0131291	0.225815
ENSMUSG00000034394	Lif	46.4599	1.04966	0.423299	2.47972	0.0131487	0.225815
ENSMUSG00000038084	Opa1	1496.68	-0.423693	0.17084	-2.48006	0.0131361	0.225815
ENSMUSG00000020621	Rdh14	433.498	-0.451519	0.182259	-2.47735	0.0132362	0.226804
ENSMUSG00000034509	Mad2l1bp	221.173	-0.447551	0.180763	-2.4759	0.01329	0.227466
ENSMUSG00000107603	Gm43921	46.4144	-0.963338	0.389271	-2.47472	0.013334	0.227961
ENSMUSG00000089774	Slc5a3	494.904	0.629469	0.254787	2.47057	0.0134899	0.230365
ENSMUSG00000019838	Slc16a10	293.543	-0.666636	0.270058	-2.46849	0.0135686	0.231187
ENSMUSG00000025967	Eef1b2	3408.82	0.394773	0.159925	2.46849	0.0135685	0.231187
ENSMUSG00000026027	Stradb	591.244	-0.510197	0.206775	-2.4674	0.0136099	0.231521
ENSMUSG00000037685	Atp8a1	317.022	-0.486824	0.197322	-2.46716	0.0136189	0.231521
ENSMUSG00000021759	Plpp1	4918.31	-0.42813	0.173594	-2.46628	0.0136525	0.231678
ENSMUSG00000044229	Nxpe4	152.82	0.998381	0.40484	2.46611	0.0136588	0.231678
ENSMUSG00000042121	Ssh1	503.568	0.397916	0.161767	2.45981	0.013901	0.235521
ENSMUSG00000055401	Fbxo6	519.788	0.371453	0.15107	2.4588	0.01394	0.235918
ENSMUSG00000063455	D630045J12Rik	319.959	-0.399335	0.16248	-2.45775	0.0139809	0.236345
ENSMUSG00000026817	Ak1	7937.48	-0.645392	0.262736	-2.45643	0.0140326	0.236827
ENSMUSG00000031438	Rnf128	144.224	-0.700586	0.285229	-2.45622	0.0140408	0.236827
ENSMUSG00000021062	Rab15	613.725	0.610461	0.248653	2.45508	0.0140855	0.237169
ENSMUSG00000026355	Mcm6	269.584	0.710397	0.289379	2.4549	0.0140925	0.237169
ENSMUSG00000026094	Stk17b	429.501	0.38138	0.15555	2.45182	0.0142136	0.238941
ENSMUSG00000003814	Calr	9618.91	0.332377	0.135641	2.45042	0.0142688	0.239238
ENSMUSG00000024044	Epb41l3	258.808	0.451335	0.184162	2.45075	0.0142559	0.239238
ENSMUSG00000032715	Trib3	252.793	0.7903	0.322549	2.45017	0.0142789	0.239238
ENSMUSG00000085282	Gm15663	54.0124	0.793063	0.323862	2.44877	0.0143345	0.239904
ENSMUSG00000001508	Sgca	756.691	-0.70203	0.286893	-2.44701	0.0144045	0.240243
ENSMUSG00000021196	Pfkp	853.833	-0.371766	0.151912	-2.44724	0.0143953	0.240243
ENSMUSG00000024552	Slc14a2	12.9209	1.50283	0.614237	2.44667	0.0144184	0.240243
ENSMUSG00000068697	Myoz1	4507.25	-1.34773	0.550682	-2.44738	0.0143899	0.240243
ENSMUSG00000058546	Rpl23a	3663.37	0.294205	0.120381	2.44396	0.0145272	0.241789
ENSMUSG00000052581	Lrrtm4	17.5297	1.52958	0.626334	2.44212	0.0146014	0.242756
ENSMUSG00000004319	Clcn3	582.347	-0.308066	0.126209	-2.44092	0.0146497	0.243292
ENSMUSG00000000531	Grasp	449.979	0.454736	0.186344	2.4403	0.0146752	0.243446
ENSMUSG00000034993	Vat1	3968.28	0.331314	0.135794	2.43982	0.0146946	0.243502
ENSMUSG00000037010	Apln	392.266	-0.332915	0.136545	-2.43813	0.0147635	0.244107
ENSMUSG00000042246	Tmc7	85.4654	-1.28048	0.525176	-2.4382	0.0147608	0.244107
ENSMUSG00000060147	Serpinb6a	4190.3	-0.431032	0.176849	-2.43729	0.014798	0.24441
ENSMUSG00000010122	Slc47a1	174.63	-0.629874	0.258552	-2.43616	0.014844	0.24467
ENSMUSG00000018334	Ksr1	715.377	-0.488001	0.200417	-2.43493	0.0148948	0.24467
ENSMUSG00000028278	Rragd	1249.5	-0.663381	0.272345	-2.43581	0.0148583	0.24467
ENSMUSG00000031807	Pgls	597.303	0.327505	0.134497	2.43504	0.0148902	0.24467
ENSMUSG00000040167	Ikzf5	133.742	-0.490935	0.201607	-2.43511	0.0148874	0.24467
ENSMUSG00000006589	Aprt	442.008	0.396165	0.162767	2.43393	0.0149358	0.245051
ENSMUSG00000030559	Rab38	25.4471	1.0132	0.41634	2.43358	0.0149505	0.245051
ENSMUSG00000022656	Nectin3	489.107	0.330923	0.136017	2.43295	0.0149763	0.245097
ENSMUSG00000026213	Stk11ip	259.548	0.411092	0.168984	2.43272	0.0149857	0.245097
ENSMUSG00000046480	Scn4b	1722.73	-0.521535	0.214466	-2.43179	0.0150246	0.245467
ENSMUSG00000027077	Smtnl1	3364.61	0.544624	0.224115	2.43011	0.0150942	0.245931
ENSMUSG00000042807	Hecw2	252.502	-0.572221	0.235489	-2.42993	0.0151019	0.245931
ENSMUSG00000079020	Slc45a4	863.652	-0.373941	0.153889	-2.42994	0.0151012	0.245931
ENSMUSG00000087014	Gm16364	16.4202	-1.37673	0.567119	-2.42759	0.0151994	0.247252
ENSMUSG00000028773	Fabp3	3880	-0.775656	0.31959	-2.42703	0.0152229	0.247367
ENSMUSG00000027460	Angpt4	29.3109	-1.81614	0.748717	-2.42567	0.0152801	0.248031
ENSMUSG00000027907	S100a11	2114.37	0.381999	0.157575	2.42423	0.0153407	0.248746
ENSMUSG00000041429	Nthl1	66.9416	0.75043	0.309652	2.42347	0.0153732	0.248926
ENSMUSG00000054263	Lifr	1084.63	-0.379548	0.156631	-2.42319	0.0153847	0.248926
ENSMUSG00000012405	Rpl15	2937.18	0.297512	0.122878	2.42119	0.0154696	0.250031
ENSMUSG00000021950	Anxa8	1907.66	-0.479319	0.19801	-2.42068	0.0154915	0.250118
ENSMUSG00000097093	C330013E15Rik	20.8085	1.16594	0.482016	2.41889	0.0155678	0.251081
ENSMUSG00000073700	Klhl21	1006.44	-0.385677	0.159616	-2.41628	0.01568	0.25262
ENSMUSG00000023348	Trip6	932.598	0.338104	0.14	2.41502	0.0157343	0.253225
ENSMUSG00000036186	Fam69b	109.973	0.612167	0.253607	2.41384	0.0157852	0.253774
ENSMUSG00000034634	Ly6d	13.6433	6.21386	2.57492	2.41322	0.0158122	0.253812
ENSMUSG00000048852	Gm12185	18.0112	-1.77394	0.735272	-2.41263	0.015838	0.253812
ENSMUSG00000069769	Msi2	1956.62	-0.375633	0.155677	-2.4129	0.0158262	0.253812
ENSMUSG00000051373	Plpp7	548.858	-0.693562	0.287527	-2.41216	0.0158583	0.253867
ENSMUSG00000005958	Ephb3	719.353	0.374163	0.155148	2.41165	0.0158805	0.253953
ENSMUSG00000028348	Cavin4	637.832	-0.687687	0.285323	-2.41021	0.0159434	0.254152
ENSMUSG00000040249	Lrp1	25937.7	0.318765	0.132238	2.41055	0.0159285	0.254152
ENSMUSG00000057337	Chst3	280.469	-0.543697	0.225578	-2.41024	0.0159419	0.254152
ENSMUSG00000036699	Zcchc12	58.1171	-1.13736	0.472092	-2.40919	0.0159878	0.254591
ENSMUSG00000038633	Degs1	1489.17	0.269486	0.111912	2.40802	0.0160392	0.255139
ENSMUSG00000032419	Tbx18	289.197	0.524282	0.217936	2.40567	0.0161426	0.256515
ENSMUSG00000019906	Lin7a	177.645	-0.425971	0.177327	-2.40218	0.0162977	0.258707
ENSMUSG00000005580	Adcy9	453.72	-0.508383	0.211738	-2.40101	0.01635	0.259265
ENSMUSG00000025651	Uqcrc1	6494.48	-0.450274	0.187679	-2.39917	0.0164325	0.26026
ENSMUSG00000032177	Pde4a	447.107	-0.397589	0.165742	-2.39884	0.0164473	0.26026
ENSMUSG00000006542	Prkag3	243.762	-1.88516	0.786078	-2.39818	0.0164767	0.260453
ENSMUSG00000073295	Nudt11	91.8808	0.60608	0.252788	2.39759	0.0165035	0.260603
ENSMUSG00000045733	Sprn	115.77	-0.561629	0.234366	-2.39637	0.0165582	0.261194
ENSMUSG00000024136	Dnase1l2	32.9113	1.41689	0.591372	2.39595	0.0165776	0.261227
ENSMUSG00000060548	Tnfrsf19	302.05	0.503836	0.210345	2.39529	0.0166073	0.261422
ENSMUSG00000054342	Kcnn4	154.247	0.765286	0.319597	2.39453	0.0166415	0.261687
ENSMUSG00000038732	Mboat1	160.193	-0.654516	0.273381	-2.39415	0.0166589	0.261689
ENSMUSG00000024544	Ldlrad4	696.204	0.40721	0.170123	2.39363	0.0166828	0.261791
ENSMUSG00000037035	Inhbb	662.156	-0.591011	0.246982	-2.39293	0.0167144	0.262015
ENSMUSG00000019970	Sgk1	1341.26	0.388464	0.16237	2.39247	0.0167356	0.262075
ENSMUSG00000003352	Cacnb3	709.647	0.429451	0.179581	2.3914	0.016784	0.262469
ENSMUSG00000037408	Cnnm4	469.762	-0.442927	0.185236	-2.39115	0.0167955	0.262469
ENSMUSG00000030452	Nipa2	411.018	-0.316649	0.132541	-2.38906	0.0168914	0.263695
ENSMUSG00000001366	Fbxo9	775.937	-0.356819	0.149383	-2.38862	0.0169119	0.263742
ENSMUSG00000027208	Fgf7	257.583	0.468627	0.196399	2.3861	0.0170283	0.265283
ENSMUSG00000033392	Clasp2	1034.7	-0.275848	0.115649	-2.38521	0.0170692	0.265645
ENSMUSG00000038403	Hfe2	3019.43	-0.615879	0.258453	-2.38295	0.0171747	0.26655
ENSMUSG00000039208	Metrnl	1005.14	0.383081	0.160746	2.38314	0.0171656	0.26655
ENSMUSG00000043782	Bicdl2	12.3554	6.06972	2.54737	2.38274	0.0171843	0.26655
ENSMUSG00000076258	Gm23935	38921	-0.555644	0.233224	-2.38245	0.0171979	0.26655
ENSMUSG00000076281	Gm24270	4062.19	-0.552014	0.231777	-2.38166	0.017235	0.26685
ENSMUSG00000040952	Rps19	3960.51	0.368967	0.155003	2.38039	0.0172945	0.267498
ENSMUSG00000039084	Chad	76175.7	0.423327	0.177899	2.37959	0.0173318	0.267801
ENSMUSG00000034449	Dhrs11	331.649	-0.551337	0.231899	-2.37749	0.0174309	0.269057
ENSMUSG00000031299	Pdha1	8025.8	-0.431253	0.181478	-2.37633	0.0174856	0.269075
ENSMUSG00000057329	Bcl2	559.554	-0.388506	0.163468	-2.37665	0.0174709	0.269075
ENSMUSG00000063767	S100a7a	12.7506	2.01935	0.849542	2.37699	0.0174546	0.269075
ENSMUSG00000023861	Mpc1	1375.28	-0.399232	0.168164	-2.37406	0.0175937	0.270463
ENSMUSG00000001175	Calm1	8430.1	-0.220723	0.0930595	-2.37185	0.0176991	0.270979
ENSMUSG00000025213	Kazald1	1181.86	-0.38325	0.161575	-2.37196	0.0176939	0.270979
ENSMUSG00000051043	Gprc5c	482.556	-0.480786	0.202691	-2.37201	0.0176915	0.270979
ENSMUSG00000057666	Gapdh	30019.7	-0.583091	0.245806	-2.37216	0.0176842	0.270979
ENSMUSG00000043635	Adamts3	251.995	0.708282	0.298849	2.37004	0.0177864	0.272039
ENSMUSG00000006411	Nectin4	37.1846	2.00288	0.845931	2.36766	0.0179007	0.272515
ENSMUSG00000030787	Lyve1	805.886	-0.471994	0.199316	-2.36807	0.017881	0.272515
ENSMUSG00000040557	Mettl27	79.9217	0.582824	0.246064	2.36858	0.0178564	0.272515
ENSMUSG00000062328	Rpl17	5275.89	0.363251	0.153431	2.36752	0.0179077	0.272515
ENSMUSG00000072553	Gm525	16.437	1.38897	0.58662	2.36774	0.017897	0.272515
ENSMUSG00000062931	Zfp938	128.027	-0.499767	0.211424	-2.36382	0.0180876	0.274878
ENSMUSG00000065987	Cd209b	38.8136	-1.07601	0.455245	-2.36358	0.0180994	0.274878
ENSMUSG00000078922	Tgtp1	18.5435	-1.40777	0.595737	-2.36308	0.0181239	0.274973
ENSMUSG00000031538	Plat	818.131	0.304186	0.128854	2.3607	0.0182406	0.276466
ENSMUSG00000078486	Perm1	1598.92	-0.642813	0.272435	-2.35951	0.0182992	0.276798
ENSMUSG00000097354	2310001H17Rik	69.4759	-0.802421	0.340057	-2.35967	0.0182914	0.276798
ENSMUSG00000020671	Rab10	3844.46	-0.361356	0.153273	-2.35759	0.0183939	0.277674
ENSMUSG00000061518	Cox5b	4139.52	-0.414683	0.17588	-2.35775	0.0183858	0.277674
ENSMUSG00000049036	Tmem121	24.4684	1.18644	0.503391	2.3569	0.0184284	0.277918
ENSMUSG00000021520	Uqcrb	2340.85	-0.443092	0.188209	-2.35426	0.0185598	0.27951
ENSMUSG00000044636	Csrnp2	120.24	0.500759	0.212724	2.35403	0.0185711	0.27951
ENSMUSG00000063388	BC023105	79.7997	-2.78368	1.18292	-2.35324	0.0186108	0.279829
ENSMUSG00000042476	Abcb4	1055.35	-0.526981	0.224051	-2.35206	0.0186699	0.280241
ENSMUSG00000098292	Gm27194	12.394	2.78283	1.1832	2.35195	0.0186753	0.280241
ENSMUSG00000037979	Ccdc92	50.927	0.801998	0.341137	2.35096	0.0187252	0.28071
ENSMUSG00000029610	Aimp2	427.989	-0.785852	0.334328	-2.35054	0.018746	0.280743
ENSMUSG00000022510	Trp63	126.099	0.846165	0.360068	2.35001	0.0187727	0.280865
ENSMUSG00000037852	Cpe	3533.82	-0.516292	0.219753	-2.34943	0.0188023	0.281022
ENSMUSG00000053963	Stum	115.62	-1.09323	0.465387	-2.34907	0.0188205	0.281022
ENSMUSG00000067889	Sptbn2	114.149	0.781824	0.332996	2.34785	0.0188822	0.281666
ENSMUSG00000057522	Spop	5699.78	-0.310674	0.132361	-2.34717	0.0189167	0.281902
ENSMUSG00000031849	Comp	73200.8	0.265818	0.113284	2.34647	0.0189523	0.282154
ENSMUSG00000004789	Dlst	3327.11	-0.378145	0.161196	-2.34586	0.018983	0.282222
ENSMUSG00000015305	Sash1	2157.93	-0.44598	0.190152	-2.34539	0.0190072	0.282222
ENSMUSG00000026827	Gpd2	695.93	-0.670896	0.286064	-2.34526	0.0190137	0.282222
ENSMUSG00000051502	Ufsp1	95.6434	-0.804905	0.343256	-2.34491	0.0190316	0.282222
ENSMUSG00000046364	Rpl27a	4646.58	0.295769	0.126189	2.34385	0.0190856	0.282744
ENSMUSG00000030869	Ndufab1	1716.05	-0.402438	0.171915	-2.34092	0.0192364	0.284242
ENSMUSG00000031119	Gpc4	815.981	0.319841	0.136655	2.3405	0.0192578	0.284242
ENSMUSG00000038871	Bpgm	514.431	-0.489385	0.209101	-2.34042	0.019262	0.284242
ENSMUSG00000050052	Tdrp	141.654	-0.544333	0.232491	-2.34131	0.019216	0.284242
ENSMUSG00000005716	Pvalb	12454	-3.11459	1.33324	-2.3361	0.019486	0.284513
ENSMUSG00000017615	Tnfaip1	1771.53	-0.244223	0.104448	-2.33821	0.0193761	0.284513
ENSMUSG00000022800	Fyttd1	1119.61	-0.330799	0.141515	-2.33756	0.0194101	0.284513
ENSMUSG00000023968	Crip3	40.8386	1.38477	0.592719	2.33631	0.0194753	0.284513
ENSMUSG00000024120	Lrpprc	1043.67	-0.360225	0.154078	-2.33795	0.01939	0.284513
ENSMUSG00000035941	Ibtk	1455.8	-0.33299	0.142542	-2.33608	0.019487	0.284513
ENSMUSG00000041144	Dnah7b	12.4904	1.63979	0.701888	2.33625	0.0194781	0.284513
ENSMUSG00000050592	Fam78a	184.136	-0.886654	0.379412	-2.33692	0.0194434	0.284513
ENSMUSG00000051234	Rnf7	1625.75	-0.324323	0.138819	-2.33631	0.0194751	0.284513
ENSMUSG00000063884	Ptcd3	573.38	-0.450149	0.192463	-2.33888	0.0193416	0.284513
ENSMUSG00000095742	CAAA01147332.1	1155.18	0.487184	0.208549	2.33607	0.0194877	0.284513
ENSMUSG00000042256	Ptchd4	32.3494	-1.44185	0.617558	-2.33476	0.0195561	0.285235
ENSMUSG00000006014	Prg4	42445	0.427604	0.183183	2.3343	0.0195798	0.285278
ENSMUSG00000020744	Slc25a19	407.109	-0.433471	0.185722	-2.33398	0.0195968	0.285278
ENSMUSG00000015337	Endog	402.449	-0.426662	0.183009	-2.33137	0.0197341	0.28649
ENSMUSG00000021764	Ndufs4	1354.9	-0.367933	0.157842	-2.33102	0.0197521	0.28649
ENSMUSG00000030884	Uqcrc2	3929.21	-0.431152	0.184968	-2.33095	0.0197559	0.28649
ENSMUSG00000036111	Lmo1	181.95	0.549238	0.235567	2.33156	0.0197238	0.28649
ENSMUSG00000028648	Ndufs5	764.442	-0.478269	0.205301	-2.3296	0.0198272	0.287247
ENSMUSG00000067017	Gm3608	264.308	-0.658344	0.282701	-2.32876	0.0198716	0.287615
ENSMUSG00000030659	Nucb2	3902.31	0.348679	0.149788	2.32781	0.0199222	0.288071
ENSMUSG00000030428	Ttyh1	140.452	0.68781	0.295533	2.32735	0.0199466	0.288147
ENSMUSG00000038201	Kcna7	779.69	-0.615691	0.264694	-2.32605	0.0200158	0.288871
ENSMUSG00000038351	Sgsm2	675.489	-0.313849	0.134986	-2.32505	0.0200692	0.289364
ENSMUSG00000021974	Fgf9	538.125	0.347081	0.149333	2.32421	0.0201145	0.289464
ENSMUSG00000078921	Tgtp2	24.8169	-1.46382	0.629771	-2.32437	0.0201059	0.289464
ENSMUSG00000015133	Lrrk1	1271.49	0.312359	0.134491	2.32252	0.020205	0.289525
ENSMUSG00000030878	Cdr2	1122.37	-0.38092	0.16399	-2.32282	0.0201888	0.289525
ENSMUSG00000032327	Stra6	16.6725	1.71418	0.738126	2.32234	0.0202146	0.289525
ENSMUSG00000074794	Arrdc3	792.88	0.298963	0.128703	2.32288	0.0201856	0.289525
ENSMUSG00000107881	Gm44250	577.284	-0.35084	0.150984	-2.32369	0.020142	0.289525
ENSMUSG00000030532	Hddc3	144.477	0.585151	0.252121	2.32092	0.0202912	0.290348
ENSMUSG00000000532	Acvr1b	459.093	-0.526603	0.22695	-2.32035	0.0203222	0.290515
ENSMUSG00000002688	Prkd1	363.494	-0.39237	0.169418	-2.31599	0.0205586	0.293062
ENSMUSG00000047843	Bri3	1027.73	0.309543	0.133653	2.31601	0.0205576	0.293062
ENSMUSG00000076433	Cep295nl	59.9622	0.897601	0.387486	2.31647	0.0205325	0.293062
ENSMUSG00000022453	Naga	849.498	0.261308	0.113014	2.31217	0.0207681	0.294361
ENSMUSG00000022749	Tbc1d23	775.251	-0.381442	0.164905	-2.31311	0.0207169	0.294361
ENSMUSG00000025504	Eps8l2	92.1958	-0.560303	0.242301	-2.31242	0.0207543	0.294361
ENSMUSG00000031333	Abcb7	735.165	-0.483291	0.208969	-2.31274	0.0207368	0.294361
ENSMUSG00000037868	Egr2	110.559	0.664885	0.287599	2.31184	0.0207862	0.294361
ENSMUSG00000039852	Rere	2862.51	0.353213	0.152749	2.31237	0.0207575	0.294361
ENSMUSG00000066191	Anks6	175.762	0.457256	0.197678	2.31313	0.0207155	0.294361
ENSMUSG00000021451	Sema4d	352.291	-0.608542	0.263456	-2.30984	0.0208969	0.295493
ENSMUSG00000066975	Cryba4	18.1646	1.77614	0.768996	2.30969	0.0209053	0.295493
ENSMUSG00000000399	Ndufa9	2569.28	-0.407133	0.17633	-2.30893	0.0209475	0.295694
ENSMUSG00000029804	Herc3	646.308	-0.449022	0.194489	-2.30873	0.0209587	0.295694
ENSMUSG00000052560	Cpne8	416.209	0.382596	0.165747	2.30831	0.020982	0.295746
ENSMUSG00000001334	Fndc5	1463.28	-0.497217	0.215487	-2.30741	0.0210318	0.296172
ENSMUSG00000028194	Ddah1	312.775	0.587681	0.254808	2.30637	0.0210898	0.296436
ENSMUSG00000071424	Grid2	45.7753	-0.9666	0.419087	-2.30644	0.021086	0.296436
ENSMUSG00000038582	Pptc7	1333.32	-0.454624	0.197155	-2.30592	0.0211152	0.296516
ENSMUSG00000068614	Actc1	4406.52	-2.77058	1.20177	-2.30541	0.0211434	0.296636
ENSMUSG00000028795	Ccdc28b	360.213	-0.516339	0.224229	-2.30273	0.0212941	0.29792
ENSMUSG00000046807	Lrrc75b	390.635	-0.505209	0.219379	-2.3029	0.0212845	0.29792
ENSMUSG00000086691	Gm15432	23.4348	-1.28254	0.556803	-2.30341	0.021256	0.29792
ENSMUSG00000040605	Bace2	617.941	0.419811	0.182499	2.30035	0.0214283	0.29952
ENSMUSG00000024134	Six2	144.628	0.829392	0.360732	2.29919	0.0214942	0.300164
ENSMUSG00000053030	Spink2	19.8368	1.21957	0.530715	2.29797	0.0215633	0.30085
ENSMUSG00000021453	Gadd45g	427.545	-0.346791	0.151032	-2.29614	0.0216677	0.302027
ENSMUSG00000030554	Synm	4711.47	-0.514214	0.224047	-2.29511	0.0217266	0.30229
ENSMUSG00000085596	Gm11476	43.3915	-0.797667	0.347524	-2.29529	0.0217167	0.30229
ENSMUSG00000025871	4833439L19Rik	1925.3	-0.277608	0.120975	-2.29475	0.0217472	0.302298
ENSMUSG00000024247	Pkdcc	660	-0.339161	0.147846	-2.29401	0.02179	0.302614
ENSMUSG00000032036	Kirrel3	63.8033	0.795432	0.346926	2.2928	0.0218595	0.303023
ENSMUSG00000039109	F13a1	1994.21	-0.335864	0.146482	-2.29287	0.0218554	0.303023
ENSMUSG00000021390	Ogn	5549.62	0.416541	0.181736	2.29202	0.0219047	0.303322
ENSMUSG00000042529	Kcnj12	221.279	-0.626404	0.273333	-2.29173	0.0219213	0.303322
ENSMUSG00000037742	Eef1a1	54202.5	0.340204	0.14848	2.29124	0.0219494	0.303432
ENSMUSG00000045064	Zc2hc1c	64.3861	0.686039	0.299594	2.28989	0.0220276	0.303957
ENSMUSG00000071454	Dtnb	166.882	0.435536	0.190192	2.28998	0.0220226	0.303957
ENSMUSG00000022454	Nell2	73.2314	-0.742215	0.324588	-2.28664	0.022217	0.306291
ENSMUSG00000029053	Prkcz	140.602	-0.465592	0.203649	-2.28625	0.0222398	0.306325
ENSMUSG00000110547	Gm29773	178.1	-0.683157	0.299134	-2.28378	0.0223844	0.308035
ENSMUSG00000008668	Rps18	5225.67	0.327085	0.143253	2.28328	0.0224141	0.308163
ENSMUSG00000079278	Tmem233	318.13	-1.76577	0.773493	-2.28285	0.0224391	0.308226
ENSMUSG00000036564	Ndrg4	1999.34	-0.324777	0.142343	-2.28166	0.0225097	0.308915
ENSMUSG00000111128	AC126804.1	133.299	0.477266	0.20925	2.28084	0.0225577	0.309293
ENSMUSG00000005718	Tfap4	93.8831	0.773671	0.339654	2.27782	0.0227372	0.311203
ENSMUSG00000107585	3300002P13Rik	70.1216	-1.10349	0.484453	-2.2778	0.0227383	0.311203
ENSMUSG00000010663	Fads1	2303.64	0.329109	0.144586	2.27622	0.0228331	0.311253
ENSMUSG00000020599	Rgs9	94.7781	-0.772026	0.339476	-2.27417	0.0229558	0.311253
ENSMUSG00000021185	Dglucy	140.8	-0.642123	0.282363	-2.2741	0.02296	0.311253
ENSMUSG00000031431	Tsc22d3	2898.14	0.271817	0.119406	2.27641	0.0228213	0.311253
ENSMUSG00000040550	Otud6b	887.5	-0.377645	0.166059	-2.27416	0.0229563	0.311253
ENSMUSG00000043445	Pgp	896.385	-0.4399	0.193395	-2.27462	0.0229286	0.311253
ENSMUSG00000044783	Hjurp	825.992	-0.451466	0.198421	-2.27529	0.0228883	0.311253
ENSMUSG00000046432	Bex3	219.198	0.490142	0.21547	2.27475	0.0229209	0.311253
ENSMUSG00000063659	Zbtb18	810.364	-0.441411	0.194116	-2.27396	0.0229687	0.311253
ENSMUSG00000068373	D430041D05Rik	80.8867	-0.725995	0.318946	-2.27623	0.0228323	0.311253
ENSMUSG00000073460	Pnldc1	36.4658	0.827405	0.363791	2.2744	0.022942	0.311253
ENSMUSG00000037846	Rtkn2	41.8803	-1.64202	0.722536	-2.27257	0.0230519	0.31182
ENSMUSG00000038127	Ccdc50	2068.66	-0.302325	0.133013	-2.2729	0.0230324	0.31182
ENSMUSG00000020650	Bcap29	299.535	-0.451882	0.198895	-2.27196	0.0230892	0.311963
ENSMUSG00000063576	Klhdc3	2497.24	-0.280122	0.123309	-2.27171	0.0231038	0.311963
ENSMUSG00000000392	Fap	833.846	0.299856	0.132017	2.27135	0.023126	0.311984
ENSMUSG00000008305	Tle1	912.222	-0.249112	0.109751	-2.26979	0.0232203	0.312409
ENSMUSG00000021815	Mss51	98.2558	-2.42498	1.06853	-2.26946	0.0232403	0.312409
ENSMUSG00000027809	Etfdh	1449.41	-0.43503	0.191641	-2.27002	0.0232063	0.312409
ENSMUSG00000032399	Rpl4	11591.9	0.297706	0.131128	2.27035	0.0231865	0.312409
ENSMUSG00000028583	Pdpn	526.397	0.331371	0.1461	2.26811	0.0233226	0.312958
ENSMUSG00000036006	Ripor2	71.6484	-0.63099	0.278173	-2.26834	0.0233088	0.312958
ENSMUSG00000063275	Hacd1	640.282	-0.525371	0.231679	-2.26767	0.0233496	0.313042
ENSMUSG00000037225	Fgf2	1070.65	-0.403578	0.178029	-2.26693	0.0233947	0.31309
ENSMUSG00000038462	Uqcrfs1	3883.89	-0.417796	0.184294	-2.26701	0.0233897	0.31309
ENSMUSG00000003518	Dusp3	1947.34	-0.298668	0.131773	-2.26654	0.0234186	0.313133
ENSMUSG00000000628	Hk2	2962.76	-0.50783	0.224416	-2.26289	0.0236425	0.315513
ENSMUSG00000074466	Gm15417	317.62	-0.415197	0.183451	-2.26326	0.0236198	0.315513
ENSMUSG00000074575	Kcng1	47.5751	-0.715069	0.316036	-2.26262	0.0236593	0.315513
ENSMUSG00000018566	Slc2a4	2792.69	-0.500225	0.221135	-2.26208	0.0236924	0.315676
ENSMUSG00000071014	Ndufb6	1224.68	-0.385095	0.170334	-2.26082	0.0237705	0.316278
ENSMUSG00000084808	9430091E24Rik	100.809	-0.507945	0.224688	-2.26067	0.0237795	0.316278
ENSMUSG00000108841	Frmpd2	12.4383	1.43413	0.635282	2.25747	0.0239786	0.318645
ENSMUSG00000038422	Hdhd3	128.51	-0.60997	0.270256	-2.25701	0.0240077	0.318751
ENSMUSG00000029312	Klhl8	257.46	-0.433681	0.192246	-2.25587	0.024079	0.319417
ENSMUSG00000018659	Pnpo	158.852	-0.485445	0.215339	-2.25433	0.0241757	0.319856
ENSMUSG00000060739	Nsa2	1351.69	0.344082	0.152619	2.25451	0.0241643	0.319856
ENSMUSG00000079168	Cd209g	25.1283	-1.23091	0.545995	-2.25444	0.0241687	0.319856
ENSMUSG00000026836	Acvr1	826.475	0.293147	0.130151	2.25237	0.024299	0.319983
ENSMUSG00000032452	Clstn2	138.9	-0.670307	0.297589	-2.25246	0.0242934	0.319983
ENSMUSG00000054720	Lrrc8c	714.733	-0.317573	0.140932	-2.25339	0.0242347	0.319983
ENSMUSG00000055435	Maf	2465.75	-0.353392	0.156821	-2.25347	0.0242292	0.319983
ENSMUSG00000061983	Rps12	8234.66	0.344772	0.153085	2.25216	0.0243124	0.319983
ENSMUSG00000107436	Gm44416	23.7219	0.999083	0.443586	2.25228	0.0243043	0.319983
ENSMUSG00000015599	Ttbk1	25.8518	-1.04453	0.464304	-2.24968	0.0244694	0.320135
ENSMUSG00000020205	Phlda1	334.553	-0.537253	0.238818	-2.24963	0.0244724	0.320135
ENSMUSG00000024527	Afg3l2	1277.22	-0.307084	0.136482	-2.25	0.024449	0.320135
ENSMUSG00000029386	Tctn2	191.111	0.491395	0.218334	2.25066	0.0244073	0.320135
ENSMUSG00000030137	Tuba8	1199.4	-0.729346	0.324194	-2.24972	0.0244669	0.320135
ENSMUSG00000031398	Plxna3	312.813	0.519913	0.231104	2.24969	0.0244689	0.320135
ENSMUSG00000043154	Ppp2r3a	2593.4	-0.433565	0.192637	-2.25069	0.0244053	0.320135
ENSMUSG00000000901	Mmp11	137.675	0.612852	0.272535	2.24871	0.0245309	0.320496
ENSMUSG00000090799	Klhl33	325.762	-0.850625	0.378303	-2.24853	0.0245425	0.320496
ENSMUSG00000024907	Gal	12.4511	-2.17393	0.967005	-2.24811	0.0245693	0.320568
ENSMUSG00000027833	Shox2	1214.69	-0.312352	0.139088	-2.24572	0.0247221	0.322284
ENSMUSG00000020098	Pcbd1	27.388	-1.00243	0.446732	-2.24392	0.0248373	0.323228
ENSMUSG00000038502	Ptov1	1752.16	0.262991	0.117197	2.24401	0.0248319	0.323228
ENSMUSG00000031558	Slit2	150.735	0.638179	0.284567	2.24264	0.0249202	0.324027
ENSMUSG00000014329	Bicc1	2556.69	0.231158	0.103191	2.24009	0.0250853	0.324814
ENSMUSG00000019818	Cd164	4082.72	-0.242448	0.108234	-2.24004	0.0250883	0.324814
ENSMUSG00000037234	Hook3	2289.07	-0.319077	0.142417	-2.24043	0.0250629	0.324814
ENSMUSG00000037759	Ptger2	46.6812	0.715589	0.319302	2.24111	0.0250191	0.324814
ENSMUSG00000053846	Lipg	34.434	1.14107	0.509366	2.24018	0.0250794	0.324814
ENSMUSG00000075318	Scn2a	179.306	0.444734	0.198571	2.23967	0.0251125	0.324849
ENSMUSG00000023973	Cnpy3	818.824	0.286791	0.128096	2.23887	0.0251643	0.325121
ENSMUSG00000027611	Procr	644.713	-0.497349	0.222162	-2.23868	0.0251767	0.325121
ENSMUSG00000020282	Rhbdf1	1522.87	0.285897	0.127802	2.23703	0.0252846	0.326236
ENSMUSG00000028989	Angptl7	121672	-0.329449	0.147323	-2.23624	0.0253361	0.326621
ENSMUSG00000027878	Notch2	1356.32	0.344805	0.154346	2.23398	0.0254846	0.327976
ENSMUSG00000044933	Sstr3	36.3751	-0.890364	0.398524	-2.23415	0.0254731	0.327976
ENSMUSG00000022013	Dnajc15	358.093	-0.441552	0.197783	-2.23251	0.0255812	0.328939
ENSMUSG00000003873	Bax	702.534	0.320431	0.1436	2.23142	0.0256533	0.329305
ENSMUSG00000071103	1700029J07Rik	16.9065	1.62086	0.726305	2.23165	0.0256383	0.329305
ENSMUSG00000005043	Sgsh	312.906	0.352898	0.158219	2.23044	0.0257182	0.329857
ENSMUSG00000034101	Ctnnd1	571.174	-0.289664	0.129907	-2.22979	0.0257617	0.330134
ENSMUSG00000067851	Arfgef1	1261.47	-0.338637	0.151994	-2.22797	0.0258827	0.331404
ENSMUSG00000092085	Gm17224	56.0985	-1.08609	0.487633	-2.22726	0.0259298	0.331726
ENSMUSG00000057706	Mex3b	186.674	0.417439	0.18748	2.22658	0.0259752	0.332025
ENSMUSG00000025427	Rnf165	122.819	-0.578147	0.259887	-2.22461	0.0261073	0.333149
ENSMUSG00000026185	Igfbp5	31594.3	-0.487955	0.219333	-2.22473	0.0260997	0.333149
ENSMUSG00000020325	Fstl3	149.121	0.594468	0.267328	2.22374	0.0261658	0.333518
ENSMUSG00000023345	Poc1a	58.3296	0.679661	0.305713	2.2232	0.0262024	0.333518
ENSMUSG00000037788	Vopp1	541.751	-0.30275	0.136169	-2.22334	0.0261928	0.333518
ENSMUSG00000025591	Tma16	136.055	-0.477108	0.214857	-2.22059	0.0263789	0.334434
ENSMUSG00000027961	Lrrc39	520.483	-0.605406	0.272555	-2.22123	0.0263357	0.334434
ENSMUSG00000028514	Usp24	1879.76	-0.29254	0.131731	-2.22073	0.026369	0.334434
ENSMUSG00000055675	Kbtbd11	303.201	-0.419446	0.188903	-2.22043	0.0263897	0.334434
ENSMUSG00000101086	Gm28651	16.4478	-1.14973	0.517855	-2.22017	0.0264074	0.334434
ENSMUSG00000105112	Gm42778	44.5831	-0.802997	0.361624	-2.22053	0.0263828	0.334434
ENSMUSG00000043384	Gprasp1	396.048	0.398976	0.179826	2.21867	0.0265089	0.335157
ENSMUSG00000060600	Eno3	18825.7	-0.656942	0.296058	-2.21896	0.0264894	0.335157
ENSMUSG00000017631	Abr	1188.05	-0.374986	0.16908	-2.2178	0.0265684	0.335434
ENSMUSG00000042155	Klhl23	469.237	-0.509562	0.229771	-2.2177	0.0265752	0.335434
ENSMUSG00000041058	Wwp1	1638.83	-0.385207	0.173769	-2.21677	0.0266385	0.335953
ENSMUSG00000002365	Snx9	1521.64	0.241716	0.109067	2.21622	0.0266762	0.336147
ENSMUSG00000039789	Zfp597	153.545	-0.491876	0.221994	-2.21572	0.0267108	0.336302
ENSMUSG00000020978	Klhdc2	1671.02	-0.268396	0.121164	-2.21516	0.0267492	0.336505
ENSMUSG00000032640	Chsy1	639.637	0.379083	0.171157	2.21482	0.0267721	0.336513
ENSMUSG00000022377	Asap1	1291.97	0.307543	0.138913	2.21392	0.0268343	0.336927
ENSMUSG00000025085	Ablim1	4249.1	0.368865	0.166629	2.2137	0.0268497	0.336927
ENSMUSG00000017697	Ada	156.43	-0.513664	0.232111	-2.21301	0.0268971	0.336962
ENSMUSG00000028179	Cth	37.5653	1.06776	0.482436	2.21328	0.0268786	0.336962
ENSMUSG00000110874	D030045P18Rik	23.8682	-1.19289	0.539297	-2.21194	0.0269708	0.337605
ENSMUSG00000053205	Styx	109.695	-0.633698	0.286575	-2.21128	0.0270162	0.337892
ENSMUSG00000048240	Gng7	104.561	0.579312	0.262152	2.20984	0.0271165	0.338867
ENSMUSG00000026833	Olfm1	771.979	0.317497	0.14377	2.20836	0.027219	0.339866
ENSMUSG00000034285	Nipsnap1	120.639	0.557627	0.252557	2.20793	0.0272495	0.339965
ENSMUSG00000027007	Ssfa2	1060.34	-0.29568	0.133982	-2.20686	0.0273238	0.340612
ENSMUSG00000013787	Ehmt2	2172.22	0.254612	0.115451	2.20536	0.0274288	0.341637
ENSMUSG00000022235	Cmbl	241.835	-0.908312	0.412062	-2.20431	0.0275028	0.342248
ENSMUSG00000079018	Ly6c1	3382.54	-0.357942	0.162404	-2.20402	0.0275231	0.342248
ENSMUSG00000029408	Abcb9	203.054	-0.370747	0.168258	-2.20345	0.0275632	0.342465
ENSMUSG00000096795	Zfp433	26.6625	-0.968186	0.439586	-2.20249	0.0276305	0.343018
ENSMUSG00000028438	Kif24	16.1122	1.25872	0.571773	2.20142	0.027706	0.343673
ENSMUSG00000049690	Nckap5	130.243	-0.511807	0.232554	-2.20081	0.0277498	0.343933
ENSMUSG00000032528	Vipr1	41.7784	-0.808508	0.367486	-2.20011	0.0277994	0.344265
ENSMUSG00000078941	Ak6	389.56	-0.324683	0.147651	-2.19898	0.0278793	0.344972
ENSMUSG00000020846	Rflnb	3305.92	0.328412	0.149522	2.19641	0.0280624	0.345679
ENSMUSG00000021565	Slc6a19	12.5227	1.75421	0.798217	2.19766	0.0279734	0.345679
ENSMUSG00000027180	Fbxo3	1544.17	-0.302349	0.137753	-2.19486	0.0281733	0.345679
ENSMUSG00000029830	Svopl	46.9963	0.896827	0.408433	2.19577	0.0281083	0.345679
ENSMUSG00000030061	Uba3	994.2	-0.273477	0.12463	-2.19431	0.0282131	0.345679
ENSMUSG00000032648	Pygm	16941.7	-1.05679	0.48109	-2.19666	0.028045	0.345679
ENSMUSG00000035372	1810055G02Rik	1224.14	-0.430749	0.196336	-2.19394	0.0282401	0.345679
ENSMUSG00000039062	Anpep	1152.37	0.311366	0.141878	2.19461	0.0281919	0.345679
ENSMUSG00000043683	Fem1a	3013.41	-0.43894	0.199914	-2.19564	0.0281174	0.345679
ENSMUSG00000051817	Sox12	185.77	0.566228	0.257808	2.19632	0.0280689	0.345679
ENSMUSG00000052821	Cysltr1	187.706	-0.474607	0.216381	-2.19338	0.0282799	0.345679
ENSMUSG00000057003	Myh4	50653.4	-3.45302	1.5742	-2.19351	0.0282706	0.345679
ENSMUSG00000062997	Rpl35	3426.8	0.356155	0.16232	2.19415	0.0282246	0.345679
ENSMUSG00000082738	Gm15422	33.2041	1.01319	0.461126	2.19722	0.0280051	0.345679
ENSMUSG00000105176	Gm43668	56.1846	-0.757827	0.345374	-2.19422	0.0282196	0.345679
ENSMUSG00000032350	Gclc	383.965	0.33368	0.152211	2.19222	0.0283638	0.346424
ENSMUSG00000109946	Brd3os	78.1314	0.62964	0.287611	2.18921	0.0285819	0.348805
ENSMUSG00000028081	Rps3a1	5804.72	0.485458	0.221944	2.1873	0.0287207	0.350216
ENSMUSG00000004885	Crabp2	90.0293	0.795595	0.364179	2.18463	0.0289163	0.350619
ENSMUSG00000007872	Id3	2679.93	-0.280411	0.128339	-2.18493	0.0288942	0.350619
ENSMUSG00000020460	Rps27a	4510.49	0.293877	0.134463	2.18556	0.028848	0.350619
ENSMUSG00000032491	Nradd	59.1074	0.718378	0.328691	2.18557	0.0288469	0.350619
ENSMUSG00000040118	Cacna2d1	4264.81	-0.402216	0.184005	-2.18589	0.0288235	0.350619
ENSMUSG00000048572	Tmem252	321.785	0.393383	0.179973	2.18579	0.0288309	0.350619
ENSMUSG00000079334	Nat6	216.625	0.350624	0.160457	2.18516	0.028877	0.350619
ENSMUSG00000034758	Tle6	84.5348	0.565216	0.258773	2.18421	0.0289466	0.350705
ENSMUSG00000079139	Gm4204	134.745	0.452237	0.207102	2.18364	0.0289884	0.350929
ENSMUSG00000050315	Synpo2	5918.1	-0.477637	0.218793	-2.18306	0.0290318	0.351173
ENSMUSG00000091498	Mpc1-ps	157.296	-0.453211	0.207692	-2.18213	0.0291001	0.351718
ENSMUSG00000026571	Dcaf6	1829.98	-0.371923	0.170523	-2.18107	0.0291784	0.352382
ENSMUSG00000039476	Prrx2	715.32	0.401737	0.184244	2.18046	0.0292237	0.352646
ENSMUSG00000020000	Moxd1	194.238	0.58613	0.269021	2.17875	0.02935	0.35329
ENSMUSG00000024187	Fam234a	1250.58	0.238953	0.109681	2.17862	0.0293599	0.35329
ENSMUSG00000058586	Serhl	220.996	-0.460731	0.211492	-2.17848	0.0293706	0.35329
ENSMUSG00000085636	Gm11769	26.2966	-0.917066	0.420869	-2.17898	0.029333	0.35329
ENSMUSG00000007891	Ctsd	6160.11	0.241688	0.110987	2.17762	0.0294343	0.353774
ENSMUSG00000022698	Naa50	4223.75	-0.362369	0.166462	-2.17689	0.029489	0.35415
ENSMUSG00000031561	Tenm3	1852.91	0.227907	0.104728	2.17618	0.0295422	0.354506
ENSMUSG00000025150	Cbr2	648.712	-0.393448	0.180838	-2.1757	0.0295777	0.354651
ENSMUSG00000021319	Sfrp4	728.697	0.538511	0.247554	2.17533	0.0296056	0.354703
ENSMUSG00000037805	Rpl10a	4008.41	0.310741	0.142947	2.17382	0.0297189	0.355779
ENSMUSG00000073375	Lrrc30	96.1682	-1.09036	0.501804	-2.17288	0.0297892	0.356337
ENSMUSG00000033826	Dnah8	29.0118	0.870499	0.400692	2.17249	0.0298187	0.356407
ENSMUSG00000020052	Ascl1	63.1409	-0.649646	0.299246	-2.17094	0.0299359	0.356609
ENSMUSG00000024064	Galnt14	14.2911	-1.49428	0.688293	-2.17099	0.029932	0.356609
ENSMUSG00000024074	Crim1	1974.03	-0.311376	0.143486	-2.17008	0.0300009	0.356609
ENSMUSG00000030681	Mvp	1646.59	0.236402	0.1089	2.17082	0.0299448	0.356609
ENSMUSG00000038425	Poli	111.019	0.453702	0.20897	2.17113	0.0299211	0.356609
ENSMUSG00000060675	Pla2g16	2358.22	-0.398418	0.183593	-2.17012	0.029998	0.356609
ENSMUSG00000067931	Zfp948	131.895	-0.460515	0.212171	-2.17049	0.0299696	0.356609
ENSMUSG00000045312	Lhfpl2	1882.28	0.381776	0.175958	2.16969	0.03003	0.356674
ENSMUSG00000045795	Whamm	289.34	0.329193	0.151748	2.16933	0.0300574	0.356719
ENSMUSG00000030031	Kbtbd8	18.9079	-1.15341	0.532023	-2.16797	0.0301607	0.357103
ENSMUSG00000034818	Celf5	17.1793	1.32998	0.613439	2.16807	0.0301535	0.357103
ENSMUSG00000042558	Adprhl2	520.6	0.274684	0.126697	2.16803	0.0301564	0.357103
ENSMUSG00000005413	Hmox1	382.136	0.338573	0.156197	2.1676	0.0301893	0.357161
ENSMUSG00000026163	Sphkap	161.611	-0.824911	0.380643	-2.16715	0.0302235	0.357286
ENSMUSG00000018770	Atp5g3	6470.13	-0.346773	0.16012	-2.16571	0.0303333	0.357744
ENSMUSG00000044252	Osbpl1a	1026.13	-0.286017	0.132061	-2.16579	0.030327	0.357744
ENSMUSG00000064225	Paqr9	115.022	-0.493725	0.227957	-2.16587	0.0303209	0.357744
ENSMUSG00000047496	Rnf152	268.394	-0.388328	0.179473	-2.16371	0.0304867	0.359272
ENSMUSG00000024168	Tmem204	988.642	0.388966	0.179932	2.16174	0.0306378	0.360084
ENSMUSG00000028484	Psip1	817.107	0.282212	0.130559	2.16157	0.0306511	0.360084
ENSMUSG00000028793	Rnf19b	823.5	0.309041	0.142964	2.16168	0.0306431	0.360084
ENSMUSG00000046718	Bst2	378.702	0.425813	0.196968	2.16184	0.0306303	0.360084
ENSMUSG00000022956	Atp5o	4144.46	-0.349083	0.161518	-2.16126	0.0306751	0.360087
ENSMUSG00000068606	Gm4841	68.3601	-2.76963	1.28245	-2.15964	0.0308008	0.361281
ENSMUSG00000038930	Rccd1	163.391	0.521181	0.241441	2.15863	0.0308791	0.361638
ENSMUSG00000039321	Uts2r	721.18	0.429158	0.198795	2.1588	0.030866	0.361638
ENSMUSG00000032271	Nnmt	506.779	0.609491	0.282455	2.15784	0.0309406	0.362077
ENSMUSG00000025068	Gsto1	557.248	0.474449	0.219908	2.15749	0.0309675	0.362112
ENSMUSG00000049307	Fut4	68.8358	-0.613936	0.284785	-2.15579	0.0310999	0.363378
ENSMUSG00000044927	H1fx	188.8	0.549122	0.254794	2.15516	0.0311493	0.363674
ENSMUSG00000034681	Rnps1	632.166	-0.454366	0.210934	-2.15407	0.0312348	0.36439
ENSMUSG00000020381	Mrnip	27.0221	0.900482	0.418121	2.15364	0.0312684	0.3645
ENSMUSG00000033510	Otud7a	17.1144	1.25071	0.580998	2.15269	0.0313428	0.365085
ENSMUSG00000028634	Hivep3	132.368	0.515	0.239285	2.15224	0.0313784	0.365218
ENSMUSG00000032740	Ccdc88a	1015.99	0.245998	0.114415	2.15005	0.0315513	0.366679
ENSMUSG00000089682	Bcl2l2	1352.27	-0.234505	0.10907	-2.15003	0.0315525	0.366679
ENSMUSG00000028383	Hsdl2	833.104	-0.438881	0.204282	-2.1484	0.0316816	0.367897
ENSMUSG00000005881	Ergic3	3150.53	0.286432	0.133379	2.1475	0.0317532	0.368009
ENSMUSG00000031727	Pmfbp1	13.9933	1.30533	0.607876	2.14736	0.0317644	0.368009
ENSMUSG00000063457	Rps15	6410.79	0.370703	0.172603	2.14772	0.0317362	0.368009
ENSMUSG00000004591	Pkn2	1096.14	-0.295253	0.137644	-2.14505	0.031949	0.368897
ENSMUSG00000018451	6330403K07Rik	15.9117	1.34354	0.626208	2.14552	0.0319112	0.368897
ENSMUSG00000025204	Ndufb8	2541.05	-0.363856	0.16956	-2.14588	0.0318827	0.368897
ENSMUSG00000027742	Cog6	1190.16	-0.294869	0.137476	-2.14487	0.0319633	0.368897
ENSMUSG00000034271	Jdp2	1078.74	0.328582	0.153193	2.14489	0.0319614	0.368897
ENSMUSG00000028173	Wls	2830.5	0.234813	0.109549	2.14345	0.0320771	0.369928
ENSMUSG00000000787	Ddx3x	4396.77	-0.236232	0.110338	-2.14098	0.032276	0.371087
ENSMUSG00000029859	Epha1	32.0055	1.58923	0.742019	2.14177	0.0322119	0.371087
ENSMUSG00000047215	Rpl9	5409.67	0.291567	0.136152	2.14148	0.0322349	0.371087
ENSMUSG00000055762	Eef1d	1870.43	0.234951	0.109727	2.14123	0.0322553	0.371087
ENSMUSG00000022559	Fbxl6	270.126	0.41056	0.191854	2.13996	0.0323581	0.371466
ENSMUSG00000027680	Fxr1	3535.7	-0.459762	0.214846	-2.13996	0.0323581	0.371466
ENSMUSG00000063179	Pstk	220.343	-0.38753	0.181219	-2.13846	0.0324797	0.372578
ENSMUSG00000006586	Runx1t1	124.67	0.500426	0.234179	2.13694	0.0326032	0.373145
ENSMUSG00000029163	Emilin1	2705.11	0.336897	0.157629	2.13727	0.0325758	0.373145
ENSMUSG00000039899	Fgl2	1771.61	-0.321757	0.150563	-2.13702	0.0325961	0.373145
ENSMUSG00000027985	Lef1	13.2278	2.45677	1.15045	2.13549	0.0327211	0.37421
ENSMUSG00000071528	Usmg5	1729.77	-0.333819	0.156438	-2.13388	0.0328529	0.375433
ENSMUSG00000066278	Vps37b	208.556	-0.379102	0.177799	-2.1322	0.0329907	0.376723
ENSMUSG00000079588	Tmem182	1578.61	-0.473743	0.222229	-2.13178	0.0330247	0.376826
ENSMUSG00000011752	Pgam1	666.356	-0.326912	0.15351	-2.12959	0.0332058	0.378601
ENSMUSG00000053199	Arhgap20	325.3	-0.56632	0.265967	-2.12929	0.0332304	0.378601
ENSMUSG00000000594	Gm2a	1622.06	0.274809	0.129142	2.12796	0.0333404	0.379568
ENSMUSG00000057113	Npm1	3090.83	0.254928	0.11982	2.12759	0.0333712	0.379632
ENSMUSG00000027305	Ndufaf1	346.008	-0.411758	0.193608	-2.12676	0.0334402	0.379844
ENSMUSG00000055447	Cd47	3667.59	-0.206957	0.0973038	-2.12692	0.033427	0.379844
ENSMUSG00000066150	Slc31a1	986.896	-0.330818	0.155598	-2.12611	0.0334942	0.380171
ENSMUSG00000020864	Ankrd40	2634.07	-0.279587	0.131549	-2.12535	0.0335576	0.380319
ENSMUSG00000023191	P3h3	3922.21	0.252762	0.118913	2.1256	0.0335363	0.380319
ENSMUSG00000020451	Limk2	473.574	0.317376	0.149354	2.12499	0.0335875	0.380348
ENSMUSG00000038803	Ost4	1380.69	-0.286994	0.135083	-2.12459	0.0336212	0.380348
ENSMUSG00000108414	Snhg1	206.246	0.390423	0.183779	2.12441	0.0336357	0.380348
ENSMUSG00000029161	Cgref1	2208.66	-0.462447	0.21789	-2.12239	0.0338054	0.38198
ENSMUSG00000028565	Nfia	2143.65	0.296054	0.139556	2.1214	0.0338884	0.382632
ENSMUSG00000074766	Ism1	1869.94	0.429615	0.202583	2.12069	0.0339482	0.38302
ENSMUSG00000021359	Tfap2a	20.9315	2.11891	0.999707	2.11954	0.0340452	0.383093
ENSMUSG00000046768	Rhoj	1600.15	0.332541	0.156903	2.11941	0.0340561	0.383093
ENSMUSG00000049755	Zfp672	324.176	-0.36962	0.174364	-2.11981	0.0340218	0.383093
ENSMUSG00000057143	Trim12c	332.197	0.329908	0.155629	2.11983	0.0340202	0.383093
ENSMUSG00000025927	Tfap2b	18.6047	1.53568	0.724856	2.11861	0.0341238	0.383569
ENSMUSG00000028671	Gale	615.816	-0.551808	0.260739	-2.11632	0.0343177	0.385461
ENSMUSG00000031442	Mcf2l	574.385	-0.411291	0.194387	-2.11583	0.0343591	0.385629
ENSMUSG00000032042	Srpr	4292.06	-0.289788	0.136981	-2.11554	0.0343837	0.385629
ENSMUSG00000043140	Tmem186	262.911	-0.325327	0.153805	-2.11518	0.0344143	0.385685
ENSMUSG00000019039	Dalrd3	231.158	0.381325	0.180325	2.11465	0.0344596	0.385907
ENSMUSG00000030930	Chst15	566.073	-0.289534	0.136945	-2.11424	0.0344949	0.386015
ENSMUSG00000028214	Gem	301.118	0.363714	0.172101	2.11337	0.034569	0.386558
ENSMUSG00000022987	Zfp641	206.703	0.455233	0.215502	2.11243	0.0346498	0.387033
ENSMUSG00000027832	Ptx3	122.79	-0.641131	0.303526	-2.11228	0.0346627	0.387033
ENSMUSG00000036298	Slc2a13	625.126	-0.317602	0.150386	-2.11191	0.0346946	0.387102
ENSMUSG00000044017	Adgrd1	987.503	0.391243	0.185383	2.11046	0.0348188	0.387915
ENSMUSG00000097666	A330094K24Rik	17.5246	-1.38669	0.656974	-2.11073	0.0347959	0.387915
ENSMUSG00000025733	Rhot2	580.062	-0.286071	0.135576	-2.11004	0.0348548	0.388029
ENSMUSG00000046380	Jrk	146.607	0.461011	0.218556	2.10935	0.0349142	0.388405
ENSMUSG00000024213	Nudt3	2086.49	-0.279447	0.132506	-2.10894	0.0349498	0.388514
ENSMUSG00000021772	Nkiras1	439.495	-0.400872	0.190135	-2.10836	0.0350003	0.38866
ENSMUSG00000030401	Rtn2	2372.29	-0.656126	0.311227	-2.10819	0.0350144	0.38866
ENSMUSG00000043629	1700019D03Rik	206.259	0.432989	0.205475	2.10726	0.0350949	0.389268
ENSMUSG00000017781	Pitpna	3115.95	-0.211325	0.100332	-2.10627	0.0351811	0.389937
ENSMUSG00000035403	Crb2	13.1937	-1.43822	0.683143	-2.10529	0.0352657	0.390587
ENSMUSG00000001542	Ell2	452.38	-0.406391	0.193208	-2.10339	0.035432	0.390995
ENSMUSG00000027347	Rasgrp1	19.89	1.07475	0.510774	2.10417	0.0353637	0.390995
ENSMUSG00000029776	Hibadh	1405.75	-0.333684	0.158604	-2.10388	0.0353888	0.390995
ENSMUSG00000031433	Rbm41	93.2203	-0.594939	0.282809	-2.10367	0.0354069	0.390995
ENSMUSG00000059811	Atl2	1024.4	-0.404987	0.192456	-2.10431	0.0353511	0.390995
ENSMUSG00000080115	Mettl21b	122.431	-0.526742	0.250589	-2.10201	0.0355521	0.392034
ENSMUSG00000052459	Atp6v1a	2272.48	0.263306	0.125333	2.10086	0.035653	0.392573
ENSMUSG00000055980	Irs1	618.028	-0.427508	0.203467	-2.10112	0.0356309	0.392573
ENSMUSG00000028251	Tstd3	146.986	-0.525759	0.25037	-2.09993	0.0357349	0.39302
ENSMUSG00000070803	Cited4	104.825	-0.881769	0.419928	-2.09981	0.0357456	0.39302
ENSMUSG00000029390	Tmed2	2678.33	-0.226185	0.10783	-2.0976	0.0359403	0.394872
ENSMUSG00000023723	Mrps23	954.437	-0.340502	0.162378	-2.09698	0.0359954	0.395003
ENSMUSG00000040666	Sh3bgr	2442.53	-0.611024	0.291397	-2.09688	0.0360045	0.395003
ENSMUSG00000031392	Irak1	1540.86	0.240067	0.114583	2.09513	0.036159	0.39641
ENSMUSG00000011305	Plin5	206.155	-0.718145	0.343045	-2.09344	0.0363096	0.397589
ENSMUSG00000109975	Gm19196	14.3181	-1.66465	0.795214	-2.09334	0.0363192	0.397589
ENSMUSG00000021113	Snapc1	172.238	-0.748427	0.358035	-2.09037	0.0365842	0.399786
ENSMUSG00000089810	Gm16536	170.775	0.437305	0.209216	2.0902	0.0365994	0.399786
ENSMUSG00000097025	Gm26558	15.6912	1.20178	0.57482	2.0907	0.0365546	0.399786
ENSMUSG00000020091	Eif4ebp2	915.972	-0.282402	0.13515	-2.08954	0.0366594	0.400152
ENSMUSG00000071637	Cebpd	900.485	0.51615	0.247119	2.08867	0.0367375	0.400715
ENSMUSG00000036882	Arhgap33	105.835	0.530213	0.25394	2.08795	0.0368025	0.401134
ENSMUSG00000026482	Rgl1	1775.93	0.247375	0.118573	2.08627	0.0369541	0.401155
ENSMUSG00000027937	Jtb	881.637	-0.242088	0.116034	-2.08635	0.036947	0.401155
ENSMUSG00000030116	Mfap5	1942.07	0.346483	0.166086	2.08616	0.0369639	0.401155
ENSMUSG00000035202	Lars2	26066.6	-0.473809	0.227111	-2.08625	0.0369561	0.401155
ENSMUSG00000059852	Kcng2	62.0762	-0.805496	0.386078	-2.08636	0.0369463	0.401155
ENSMUSG00000073293	Nudt10	31.9724	0.803842	0.385265	2.08647	0.0369362	0.401155
ENSMUSG00000081087	Rps15a-ps7	128.469	1.86989	0.89654	2.08568	0.0370079	0.401344
ENSMUSG00000043126	D830039M14Rik	66.2591	-0.696939	0.334207	-2.08535	0.0370378	0.40138
ENSMUSG00000011884	Gltp	1158.9	-0.32138	0.154183	-2.0844	0.0371236	0.401734
ENSMUSG00000025272	Tro	71.1865	0.684925	0.32858	2.0845	0.0371147	0.401734
ENSMUSG00000024811	Tnks2	2846.97	-0.245974	0.118063	-2.08342	0.0372129	0.402212
ENSMUSG00000026822	Lcn2	191.568	-0.611761	0.293646	-2.08333	0.0372211	0.402212
ENSMUSG00000031097	Tnni2	27778.7	-0.584621	0.280671	-2.08294	0.0372564	0.402305
ENSMUSG00000060924	Csmd1	26.6111	-0.966086	0.463947	-2.08232	0.0373134	0.402632
ENSMUSG00000083022	Rps15a-ps6	89.0317	1.0765	0.517131	2.08167	0.0373723	0.402981
ENSMUSG00000027412	Lpin3	624.235	-0.407052	0.1956	-2.08104	0.0374302	0.403029
ENSMUSG00000070476	Fam217b	318.023	0.388642	0.18674	2.08119	0.0374162	0.403029
ENSMUSG00000071342	Lsmem1	124.348	-0.697148	0.335125	-2.08026	0.0375014	0.403508
ENSMUSG00000072964	Bhlhb9	227.657	0.332703	0.159988	2.07956	0.0375663	0.403918
ENSMUSG00000009376	Met	809.257	-0.247804	0.119215	-2.07863	0.0376517	0.404299
ENSMUSG00000045394	Epcam	14.2501	2.09821	1.00958	2.07831	0.0376809	0.404299
ENSMUSG00000056185	Snx32	145.886	0.430327	0.207057	2.0783	0.0376821	0.404299
ENSMUSG00000051412	Vamp7	382.014	-0.351327	0.169126	-2.0773	0.0377736	0.404993
ENSMUSG00000054027	Nt5dc3	822.422	-0.431044	0.207546	-2.07686	0.0378147	0.405146
ENSMUSG00000006395	Hyi	341.132	0.476543	0.229664	2.07496	0.0379901	0.405214
ENSMUSG00000015733	Capza2	3060.84	-0.291708	0.140584	-2.07497	0.037989	0.405214
ENSMUSG00000027708	Dcun1d1	639.603	-0.273765	0.131962	-2.07457	0.0380262	0.405214
ENSMUSG00000029306	Ibsp	1168.39	-1.39006	0.669944	-2.07489	0.0379968	0.405214
ENSMUSG00000031494	Cd209a	25.5526	1.9263	0.928834	2.07389	0.0380895	0.405214
ENSMUSG00000036334	Igsf10	2652.94	0.287023	0.138368	2.07435	0.038047	0.405214
ENSMUSG00000046727	Cystm1	622.205	-0.524875	0.253058	-2.07413	0.0380675	0.405214
ENSMUSG00000053297	AI854703	35.7661	0.810306	0.390704	2.07396	0.0380827	0.405214
ENSMUSG00000053552	Ebf4	76.7149	0.583506	0.281131	2.07556	0.0379343	0.405214
ENSMUSG00000059810	Rgs3	743.779	-0.238516	0.114997	-2.07411	0.0380688	0.405214
ENSMUSG00000028322	Exosc3	298.124	-0.378239	0.182436	-2.07327	0.0381469	0.405229
ENSMUSG00000034109	Golim4	3328.64	-0.258783	0.124834	-2.07301	0.0381714	0.405229
ENSMUSG00000056612	Ppp1r14b	1516.92	0.291159	0.14043	2.07334	0.0381404	0.405229
ENSMUSG00000022407	Adsl	925.35	-0.421021	0.203366	-2.07026	0.0384282	0.407552
ENSMUSG00000024308	Tapbp	2405.8	0.259038	0.125134	2.07009	0.0384443	0.407552
ENSMUSG00000048911	Rnf24	337.13	-0.440286	0.212744	-2.06956	0.038494	0.407793
ENSMUSG00000022799	Arhgap31	1549	-0.332016	0.160513	-2.06846	0.0385968	0.407923
ENSMUSG00000029636	Wasf3	65.3903	0.560063	0.27081	2.0681	0.0386306	0.407923
ENSMUSG00000051599	Pcdhb2	13.2742	1.38141	0.668075	2.06774	0.0386643	0.407923
ENSMUSG00000059003	Grin2a	48.8303	0.653977	0.316283	2.0677	0.0386683	0.407923
ENSMUSG00000068396	Rpl34-ps1	352.027	-0.606607	0.293367	-2.06774	0.0386641	0.407923
ENSMUSG00000070509	Rgma	997.467	0.245206	0.118531	2.0687	0.0385739	0.407923
ENSMUSG00000043252	Tmem64	1808.78	-0.388939	0.18813	-2.0674	0.0386966	0.407936
ENSMUSG00000025129	Ppp1r27	968.879	-0.51341	0.248466	-2.06632	0.0387986	0.408726
ENSMUSG00000028937	Acot7	443.461	-0.304629	0.147544	-2.06467	0.0389539	0.409789
ENSMUSG00000030306	Tmtc1	1269.05	-0.391349	0.189543	-2.0647	0.0389515	0.409789
ENSMUSG00000000031	H19	22292.6	0.412022	0.199649	2.06373	0.0390436	0.410447
ENSMUSG00000023991	Foxp4	1175.78	0.222946	0.108113	2.06215	0.0391936	0.411451
ENSMUSG00000094410	Gm38394	149.412	-0.466548	0.226219	-2.06237	0.0391722	0.411451
ENSMUSG00000024019	Cmtr1	209.298	-0.3528	0.171119	-2.06172	0.0392348	0.411597
ENSMUSG00000044177	Wfikkn2	83.1313	-0.542826	0.263338	-2.06133	0.0392717	0.411698
ENSMUSG00000000563	Atp5f1	5174.91	-0.339053	0.16459	-2.05998	0.0394005	0.412158
ENSMUSG00000025508	Rplp2	4533.34	0.317408	0.154096	2.05981	0.0394168	0.412158
ENSMUSG00000046186	Cd109	2351.94	0.249896	0.121279	2.06051	0.0393499	0.412158
ENSMUSG00000092675	Gm25262	16.9271	-1.16405	0.565149	-2.05973	0.0394248	0.412158
ENSMUSG00000001082	Mfsd10	375.108	0.386256	0.187679	2.05807	0.0395838	0.412791
ENSMUSG00000025216	Lbx1	542.838	-0.640193	0.311136	-2.0576	0.0396288	0.412791
ENSMUSG00000034390	Cmip	794.941	-0.329575	0.160153	-2.05787	0.0396023	0.412791
ENSMUSG00000038894	Irs2	619.839	0.314969	0.153092	2.05738	0.0396494	0.412791
ENSMUSG00000047881	Rell1	714.849	0.29744	0.144504	2.05835	0.0395561	0.412791
ENSMUSG00000068798	Rap1a	1644.9	-0.202965	0.0986382	-2.05767	0.0396219	0.412791
ENSMUSG00000025428	Atp5a1	22341.9	-0.373936	0.181792	-2.05694	0.0396918	0.412948
ENSMUSG00000031835	Mbtps1	3055.14	0.220781	0.107385	2.05597	0.0397855	0.413637
ENSMUSG00000063919	Srrm4	32.8479	-0.829501	0.40357	-2.05541	0.0398399	0.413918
ENSMUSG00000021952	Xpo4	302.166	-0.516074	0.251249	-2.05404	0.0399722	0.415007
ENSMUSG00000030699	Tbx6	19.0173	1.1581	0.563973	2.05348	0.0400265	0.415285
ENSMUSG00000047250	Ptgs1	343.477	-0.389769	0.189863	-2.0529	0.0400825	0.415581
ENSMUSG00000022664	Slc35a5	323.971	0.380251	0.185325	2.0518	0.040189	0.416399
ENSMUSG00000025722	Wdr73	212.652	0.383676	0.187028	2.05144	0.0402245	0.41648
ENSMUSG00000032131	Abcg4	78.7738	0.590579	0.288079	2.05006	0.0403587	0.417584
ENSMUSG00000009687	Fxyd5	2062.08	-0.45639	0.22286	-2.04787	0.0405723	0.419069
ENSMUSG00000024049	Myom1	7958.31	-0.452264	0.220845	-2.04788	0.0405719	0.419069
ENSMUSG00000066637	Ttc32	131.709	-0.463594	0.226393	-2.04774	0.0405855	0.419069
ENSMUSG00000025735	Rhbdl1	47.0682	-0.876791	0.42838	-2.04676	0.0406816	0.419497
ENSMUSG00000056598	Drc3	15.898	-1.0732	0.524342	-2.04675	0.0406825	0.419497
ENSMUSG00000025340	Rabgef1	599.887	-0.27679	0.135332	-2.04527	0.0408285	0.420709
ENSMUSG00000052337	Immt	2742.54	-0.321565	0.157245	-2.04499	0.0408558	0.420709
ENSMUSG00000064342	mt-Ti	49.4112	-0.608513	0.297894	-2.04271	0.0410807	0.422736
ENSMUSG00000027489	Necab3	50.8491	-0.706106	0.345746	-2.04227	0.0411247	0.422901
ENSMUSG00000022744	Cldnd1	690.349	-0.27427	0.134344	-2.04154	0.0411968	0.423354
ENSMUSG00000027253	Lrp4	1086.5	0.250138	0.122616	2.04001	0.041349	0.42434
ENSMUSG00000028039	Efna3	21.773	1.82962	0.89684	2.04007	0.0413432	0.42434
ENSMUSG00000028530	Jak1	3006.04	-0.237288	0.116354	-2.03937	0.0414132	0.42471
ENSMUSG00000003581	Rnf215	410.095	0.272714	0.133841	2.03761	0.0415892	0.426226
ENSMUSG00000033047	Eif3l	1409.47	0.197454	0.0969566	2.03652	0.0416981	0.426867
ENSMUSG00000034780	B3galt1	66.6435	-0.59775	0.293624	-2.03577	0.0417738	0.426867
ENSMUSG00000047409	Ctdspl	1031.16	0.32336	0.158841	2.03575	0.041775	0.426867
ENSMUSG00000056708	Ier5	639.821	-0.373551	0.183512	-2.03557	0.0417931	0.426867
ENSMUSG00000103114	Gm32200	15.5152	-1.50551	0.739376	-2.03618	0.041732	0.426867
ENSMUSG00000013236	Ptprs	3788.53	0.244313	0.12006	2.03493	0.0418579	0.427157
ENSMUSG00000023089	Ndufa5	2059.41	-0.457583	0.224948	-2.03417	0.0419347	0.427157
ENSMUSG00000037217	Syn1	33.8604	0.769541	0.37824	2.03453	0.0418982	0.427157
ENSMUSG00000051550	Zfp579	232.5	0.352314	0.173187	2.0343	0.0419212	0.427157
ENSMUSG00000022206	Npr3	861.586	-0.679682	0.334188	-2.03383	0.0419687	0.427214
ENSMUSG00000020656	Grhl1	49.0632	1.48377	0.730139	2.03218	0.0421357	0.427761
ENSMUSG00000025823	Pdia4	1702.68	0.303279	0.149229	2.03231	0.042122	0.427761
ENSMUSG00000026407	Cacna1s	3688.43	-0.570761	0.280855	-2.03223	0.0421305	0.427761
ENSMUSG00000029684	Wasl	1224.78	0.268833	0.13224	2.03291	0.0420617	0.427761
ENSMUSG00000030752	Kdm8	75.8388	-0.560128	0.275691	-2.03172	0.0421819	0.427942
ENSMUSG00000028969	Cdk5	436.492	0.298137	0.14689	2.02966	0.0423907	0.429341
ENSMUSG00000058145	Adamts17	215.557	0.588293	0.289868	2.02952	0.0424051	0.429341
ENSMUSG00000110206	Flt3l	109.975	0.455339	0.224314	2.02992	0.042365	0.429341
ENSMUSG00000022892	App	17024.4	0.205763	0.101474	2.02775	0.0425862	0.430885
ENSMUSG00000021477	Ctsl	7531.2	0.215616	0.1064	2.02646	0.0427181	0.431931
ENSMUSG00000004665	Cnn2	2986.52	0.252709	0.124724	2.02615	0.0427496	0.43196
ENSMUSG00000003345	Csnk1g2	3116.17	0.226007	0.111608	2.02501	0.0428663	0.43256
ENSMUSG00000099876	Gm29650	30.8269	0.844091	0.416824	2.02505	0.0428619	0.43256
ENSMUSG00000022890	Atp5j	4210.26	-0.332465	0.164371	-2.02265	0.043109	0.433878
ENSMUSG00000034614	Pik3ip1	472.214	0.561895	0.277765	2.02291	0.0430822	0.433878
ENSMUSG00000035226	Rims4	50.0077	-0.607978	0.300589	-2.02262	0.0431119	0.433878
ENSMUSG00000064350	mt-Ty	109.034	-0.460365	0.227547	-2.02317	0.0430561	0.433878
ENSMUSG00000053768	Chchd3	1868.35	-0.380906	0.18835	-2.02234	0.0431415	0.433887
ENSMUSG00000046532	Ar	1126.06	-0.29483	0.145833	-2.0217	0.0432072	0.434258
ENSMUSG00000023959	Clic5	3035.94	-0.532722	0.263611	-2.02086	0.0432943	0.434266
ENSMUSG00000041440	Gk5	166.571	-0.423174	0.209349	-2.02138	0.0432402	0.434266
ENSMUSG00000052533	Nup188	618.113	0.29329	0.14512	2.02102	0.0432774	0.434266
ENSMUSG00000020664	Dld	3007.1	-0.337609	0.167145	-2.01986	0.0433983	0.43443
ENSMUSG00000022466	Rpap3	237.025	-0.374364	0.185294	-2.02038	0.0433437	0.43443
ENSMUSG00000028527	Ak4	503.366	-0.348775	0.172719	-2.01931	0.0434545	0.43443
ENSMUSG00000031950	Gabarapl2	808.041	-0.291518	0.144363	-2.01933	0.0434526	0.43443
ENSMUSG00000056054	S100a8	12.6463	-2.00519	0.992656	-2.02002	0.0433809	0.43443
ENSMUSG00000006728	Cdk4	1143.87	0.314818	0.155967	2.01849	0.04354	0.434997
ENSMUSG00000028788	Ptp4a2	7071.97	-0.279186	0.138405	-2.01716	0.0436788	0.436095
ENSMUSG00000022354	Ndufb9	2995.59	-0.339715	0.168537	-2.01568	0.0438337	0.437063
ENSMUSG00000053565	Eif3k	1186.48	0.277588	0.137701	2.01588	0.0438127	0.437063
ENSMUSG00000078937	Cpt1b	348.593	-0.541037	0.268503	-2.01501	0.0439032	0.437467
ENSMUSG00000008730	Hipk1	2069.62	-0.246394	0.122335	-2.0141	0.0439995	0.437849
ENSMUSG00000025488	Cox8b	2816.39	-0.469894	0.233295	-2.01416	0.0439926	0.437849
ENSMUSG00000028381	Ugcg	649.47	0.263028	0.13066	2.01307	0.044107	0.438629
ENSMUSG00000002006	Pdzd4	367.596	0.284556	0.141395	2.01249	0.0441686	0.438952
ENSMUSG00000022893	Adamts1	1427.57	-0.407913	0.202721	-2.01219	0.0442004	0.43898
ENSMUSG00000062753	AI413582	189.831	0.5491	0.272973	2.01156	0.0442666	0.439348
ENSMUSG00000020627	Klhl29	1004.11	0.357461	0.177858	2.00981	0.0444508	0.440598
ENSMUSG00000058173	Smco4	743.799	-0.335394	0.166863	-2.01	0.0444312	0.440598
ENSMUSG00000028760	Eif4g3	2589.37	-0.221391	0.110177	-2.00941	0.0444937	0.440733
ENSMUSG00000016757	Ttll12	307.145	0.30434	0.151531	2.00843	0.0445975	0.440893
ENSMUSG00000045790	Ccdc149	511.258	-0.296081	0.147418	-2.00845	0.044596	0.440893
ENSMUSG00000071540	3425401B19Rik	2805.27	-0.457391	0.227675	-2.00896	0.0445414	0.440893
ENSMUSG00000020132	Rab21	1196.02	-0.286723	0.142853	-2.00711	0.0447378	0.441991
ENSMUSG00000029862	Clcn1	538.645	-0.652975	0.325558	-2.00571	0.0448876	0.443005
ENSMUSG00000063787	Chchd1	589.746	-0.405234	0.202079	-2.00532	0.0449285	0.443005
ENSMUSG00000090210	Itga10	613.161	0.382036	0.190486	2.00558	0.0449008	0.443005
ENSMUSG00000013495	Tmem175	260.177	0.324101	0.161657	2.00487	0.0449771	0.443194
ENSMUSG00000006333	Rps9	8137.51	0.316403	0.157864	2.00427	0.0450408	0.443244
ENSMUSG00000035021	Baz1a	232.134	0.350519	0.17488	2.00433	0.0450342	0.443244
ENSMUSG00000067586	S1pr3	397.503	-0.502133	0.250717	-2.00279	0.0452002	0.444233
ENSMUSG00000068580	Zfyve19	201.917	0.389689	0.194552	2.00301	0.0451767	0.444233
ENSMUSG00000022761	Lztr1	1188.6	0.297515	0.148621	2.00183	0.0453028	0.444324
ENSMUSG00000023845	Lnpep	579.588	-0.406433	0.203071	-2.00144	0.0453454	0.444324
ENSMUSG00000027406	Idh3b	4367.52	-0.380792	0.190269	-2.00133	0.0453566	0.444324
ENSMUSG00000041757	Plekha6	402.593	0.427217	0.213456	2.00143	0.0453464	0.444324
ENSMUSG00000070323	Mmp27	20.7018	-1.05957	0.529379	-2.00153	0.0453357	0.444324
ENSMUSG00000029616	Erp29	1543.56	0.23606	0.118015	2.00026	0.0454721	0.444878
ENSMUSG00000036131	Frmd7	91.8888	-0.556886	0.278391	-2.00037	0.0454601	0.444878
ENSMUSG00000039911	Spsb1	434.928	0.285628	0.142892	1.99891	0.0456177	0.446014
ENSMUSG00000005983	1700037C18Rik	27.0056	0.850703	0.42569	1.99841	0.0456719	0.446254
ENSMUSG00000021898	Asb14	246.293	-0.571413	0.285985	-1.99805	0.0457109	0.446346
ENSMUSG00000032268	Tmprss5	12.5271	-1.42695	0.714301	-1.99768	0.045751	0.446449
ENSMUSG00000005683	Cs	6576.23	-0.358249	0.17946	-1.99626	0.0459053	0.446512
ENSMUSG00000028854	Slc9a1	821.505	0.232637	0.116489	1.99708	0.0458165	0.446512
ENSMUSG00000029407	Uso1	2852.12	-0.260255	0.130349	-1.9966	0.0458684	0.446512
ENSMUSG00000035107	Dcbld2	432.368	-0.342798	0.171705	-1.99643	0.045887	0.446512
ENSMUSG00000044576	Garem2	13.0923	1.24713	0.624564	1.99679	0.0458476	0.446512
ENSMUSG00000021094	Dhrs7	1041.29	-0.328649	0.164673	-1.99577	0.0459586	0.446743
ENSMUSG00000051000	Fam160a1	615.225	-0.504806	0.253047	-1.99491	0.0460526	0.447368
ENSMUSG00000018909	Arrb1	1163.66	-0.380671	0.19092	-1.99388	0.0461654	0.448065
ENSMUSG00000020439	Smtn	3693.33	0.243524	0.122159	1.99351	0.0462056	0.448065
ENSMUSG00000026494	Kif26b	74.4312	0.707087	0.35471	1.99342	0.046215	0.448065
ENSMUSG00000059921	Unc5c	54.855	-0.725126	0.363806	-1.99317	0.0462431	0.448065
ENSMUSG00000022519	Srl	11434.1	-0.510127	0.256039	-1.99238	0.0463295	0.448615
ENSMUSG00000026103	Gls	2353.43	-0.258212	0.129636	-1.99183	0.0463901	0.448626
ENSMUSG00000030738	Eif3c	3149.86	0.204908	0.102871	1.9919	0.0463825	0.448626
ENSMUSG00000019960	Dusp6	792.272	0.376687	0.189209	1.99085	0.0464972	0.448757
ENSMUSG00000031007	Atp6ap2	1634.84	0.222836	0.111943	1.99062	0.0465226	0.448757
ENSMUSG00000046402	Rbp1	164.664	0.590673	0.29666	1.99108	0.0464721	0.448757
ENSMUSG00000078923	Ube2v1	88.8603	-0.465285	0.233678	-1.99114	0.0464653	0.448757
ENSMUSG00000026156	B3gat2	16.5228	1.03785	0.521459	1.99027	0.0465607	0.448838
ENSMUSG00000029672	Fam3c	2557.58	-0.238472	0.119941	-1.98825	0.046784	0.450416
ENSMUSG00000071648	Rom1	431.432	-0.335322	0.168631	-1.98849	0.046757	0.450416
ENSMUSG00000028584	Lrrc38	182.51	-0.517232	0.260218	-1.98769	0.0468457	0.450722
ENSMUSG00000033029	1700088E04Rik	17.2956	1.01524	0.51094	1.98701	0.0469214	0.451045
ENSMUSG00000054477	Kcnn2	49.0843	0.675644	0.340058	1.98685	0.046939	0.451045
ENSMUSG00000071793	2610005L07Rik	159.293	-0.683561	0.344168	-1.98612	0.0470198	0.451534
ENSMUSG00000087095	Emx2os	16.3257	1.07718	0.542563	1.98536	0.0471043	0.452058
ENSMUSG00000018893	Mb	27322.5	-0.474588	0.239104	-1.98486	0.0471597	0.452302
ENSMUSG00000015342	Xk	97.8267	-0.530897	0.267609	-1.98386	0.0472717	0.453088
ENSMUSG00000027668	Mfn1	1624.24	-0.302192	0.152421	-1.98262	0.0474103	0.454128
ENSMUSG00000022849	Hspbap1	73.1671	0.568646	0.2869	1.98204	0.0474751	0.454172
ENSMUSG00000052688	Rab7b	411.33	0.328511	0.16573	1.98221	0.0474559	0.454172
ENSMUSG00000008318	Relt	150.043	-0.572193	0.288921	-1.98045	0.0476534	0.454438
ENSMUSG00000024976	Shoc2	858.636	-0.216292	0.109191	-1.98086	0.0476075	0.454438
ENSMUSG00000041417	Pik3r1	3574.78	-0.340019	0.171676	-1.98059	0.0476374	0.454438
ENSMUSG00000057123	Gja5	116.321	-0.724126	0.365461	-1.9814	0.0475459	0.454438
ENSMUSG00000070348	Ccnd1	1139.6	-0.453125	0.22875	-1.98087	0.0476058	0.454438
ENSMUSG00000020010	Vnn3	35.8392	1.00591	0.508013	1.98009	0.0476936	0.454535
ENSMUSG00000025409	Mbd6	609.397	0.306882	0.155043	1.97933	0.0477788	0.45506
ENSMUSG00000018845	Unc45b	1309.05	-0.486353	0.245879	-1.97802	0.0479269	0.455321
ENSMUSG00000027187	Cat	2129.57	0.260404	0.1316	1.97875	0.0478442	0.455321
ENSMUSG00000041592	Sdk2	896.143	-0.410631	0.207576	-1.97822	0.0479041	0.455321
ENSMUSG00000079508	Apoo	476.866	-0.447301	0.226105	-1.97829	0.0478955	0.455321
ENSMUSG00000034842	Art3	1149.45	-0.430943	0.217904	-1.97767	0.0479655	0.455401
ENSMUSG00000005510	Ndufs3	1946.47	-0.340749	0.172403	-1.97647	0.0481015	0.456319
ENSMUSG00000006731	B4galnt1	175.944	0.42286	0.214036	1.97565	0.0481947	0.456319
ENSMUSG00000017760	Ctsa	2858.02	0.287025	0.145293	1.97548	0.0482133	0.456319
ENSMUSG00000029168	Dpysl5	219.383	-0.453278	0.229434	-1.97563	0.0481964	0.456319
ENSMUSG00000038884	A230050P20Rik	115.115	0.480763	0.243326	1.9758	0.0481774	0.456319
ENSMUSG00000042115	Klhdc8a	712.506	-0.449279	0.227511	-1.97476	0.0482956	0.456525
ENSMUSG00000101304	Plet1os	20.7347	1.40483	0.711333	1.97493	0.0482761	0.456525
ENSMUSG00000078566	Bnip3	2376.89	-0.383909	0.194495	-1.97388	0.0483954	0.457182
ENSMUSG00000100213	Gm28151	12.5353	1.16862	0.592488	1.9724	0.0485639	0.458487
ENSMUSG00000035863	Palm	1761.08	0.354739	0.179967	1.97113	0.0487093	0.45953
ENSMUSG00000043019	Edem3	1415.74	-0.272119	0.138079	-1.97075	0.048752	0.45953
ENSMUSG00000050608	Minos1	2053.68	-0.290258	0.147311	-1.97038	0.0487949	0.45953
ENSMUSG00000086283	2810433D01Rik	14.6122	1.24344	0.631071	1.97037	0.0487961	0.45953
ENSMUSG00000008206	Cers4	538.397	-0.327978	0.166528	-1.9695	0.0488952	0.459971
ENSMUSG00000026491	Ahctf1	879.686	-0.229879	0.116724	-1.96943	0.0489039	0.459971
ENSMUSG00000071708	Sms	548.169	-0.528923	0.268651	-1.96881	0.0489752	0.460355
ENSMUSG00000022742	Cpox	670.772	-0.306955	0.155937	-1.96845	0.0490163	0.460454
ENSMUSG00000021866	Anxa11	696.658	-0.295982	0.150436	-1.9675	0.0491254	0.461192
ENSMUSG00000053475	Tnfaip6	196.498	0.457852	0.2329	1.96587	0.0493133	0.462669
ENSMUSG00000016534	Lamp2	4786.06	0.195355	0.0994008	1.96533	0.049376	0.462969
ENSMUSG00000024899	Papss2	837.04	-0.266948	0.135854	-1.96496	0.049419	0.463085
ENSMUSG00000008845	Cd163	644.681	-0.428316	0.21806	-1.96421	0.0495052	0.463604
ENSMUSG00000029992	Gfpt1	1377.31	-0.321153	0.16368	-1.96207	0.0497538	0.465644
ENSMUSG00000044667	Plppr4	34.4297	-0.724468	0.369438	-1.961	0.0498791	0.466527
ENSMUSG00000026012	Cd28	55.7425	-1.30255	0.66444	-1.96037	0.0499527	0.466926
ENSMUSG00000039004	Bmp6	494.998	0.356482	0.181873	1.96006	0.049989	0.466976
ENSMUSG00000028798	Eif3i	1471.35	0.28583	0.145933	1.95864	0.0501549	0.468237
ENSMUSG00000020456	Ogdh	8387.98	-0.318261	0.16258	-1.95757	0.0502807	0.468571
ENSMUSG00000021936	Mapk8	534.763	-0.275255	0.140609	-1.95759	0.0502778	0.468571
ENSMUSG00000030704	Rab6a	2371.08	-0.251381	0.128417	-1.95754	0.0502838	0.468571
ENSMUSG00000030120	Mlf2	3703.72	-0.244204	0.124786	-1.95698	0.0503493	0.468891
ENSMUSG00000069920	B3gnt9	1404.89	0.26244	0.134128	1.95664	0.0503904	0.468985
ENSMUSG00000048138	Dmrt2	198.354	-0.366094	0.18714	-1.95626	0.0504346	0.469107
ENSMUSG00000057322	Rpl38	1882.74	0.284434	0.14542	1.95594	0.0504718	0.469164
ENSMUSG00000050931	Sgms2	760.13	-0.268659	0.137412	-1.95513	0.0505675	0.469765
ENSMUSG00000031068	Glrx3	1643.36	-0.266419	0.136305	-1.95458	0.0506322	0.470076
ENSMUSG00000009633	G0s2	953.862	-0.473179	0.242245	-1.95331	0.0507831	0.470648
ENSMUSG00000032393	Dpp8	2013.89	-0.265693	0.13604	-1.95305	0.0508133	0.470648
ENSMUSG00000040829	Zmynd15	43.1519	0.683398	0.349921	1.95301	0.0508185	0.470648
ENSMUSG00000062421	Arf2	1195.43	-0.238575	0.12211	-1.95376	0.0507291	0.470648
ENSMUSG00000025544	Tm9sf2	3390.72	-0.182828	0.0936669	-1.95189	0.0509511	0.470728
ENSMUSG00000028478	Clta	2645.92	0.218118	0.111729	1.9522	0.0509147	0.470728
ENSMUSG00000037295	Ldlrap1	1237.89	-0.24349	0.124719	-1.9523	0.0509022	0.470728
ENSMUSG00000095438	Mir133a-1hg	30.5435	-0.835394	0.427993	-1.95188	0.0509519	0.470728
ENSMUSG00000000441	Raf1	952.52	-0.236058	0.120982	-1.95119	0.0510341	0.470912
ENSMUSG00000027165	B230118H07Rik	397.038	-0.352015	0.180395	-1.95136	0.0510147	0.470912
ENSMUSG00000021175	Cdca7l	33.9923	0.842054	0.431704	1.95054	0.0511122	0.471344
ENSMUSG00000038086	Hspb2	1015.45	-0.462994	0.237438	-1.94996	0.0511811	0.471691
ENSMUSG00000041733	Coq5	951.15	-0.357874	0.183694	-1.9482	0.0513906	0.473333
ENSMUSG00000016386	Mpped2	62.2246	0.695477	0.357105	1.94754	0.0514699	0.473774
ENSMUSG00000032593	Amigo3	197.696	-0.485974	0.249652	-1.9466	0.0515825	0.474232
ENSMUSG00000050953	Gja1	8364.88	-0.28584	0.14683	-1.94674	0.0515662	0.474232
ENSMUSG00000027394	Ttl	827.158	0.24862	0.127793	1.9455	0.0517152	0.475163
ENSMUSG00000090698	Apold1	299.143	0.484675	0.249255	1.9445	0.0518357	0.47598
ENSMUSG00000002210	Smg9	237.849	0.325652	0.167589	1.94316	0.0519972	0.476575
ENSMUSG00000022747	St3gal6	543.106	-0.424661	0.218527	-1.94328	0.0519818	0.476575
ENSMUSG00000026825	Dnm1	2792.9	0.208971	0.107549	1.94303	0.0520129	0.476575
ENSMUSG00000040048	Ndufb10	2532.39	-0.299641	0.154223	-1.94291	0.0520267	0.476575
ENSMUSG00000073409	H2-Q6	42.1479	-1.14269	0.588266	-1.94247	0.0520806	0.476779
ENSMUSG00000039405	Prss23	837.948	-0.396425	0.204149	-1.94185	0.0521558	0.477178
ENSMUSG00000044645	Gm7334	45.9696	-1.54433	0.795423	-1.94151	0.0521961	0.477257
ENSMUSG00000020181	Nav3	197.117	0.328545	0.169368	1.93983	0.0524004	0.477391
ENSMUSG00000021606	Ndufs6	1271.73	-0.318305	0.164087	-1.93986	0.0523968	0.477391
ENSMUSG00000026305	Lrrfip1	2234.53	-0.328523	0.169249	-1.94106	0.0522507	0.477391
ENSMUSG00000029348	Asphd2	60.8534	0.619337	0.319164	1.9405	0.0523189	0.477391
ENSMUSG00000046152	Fut10	238.121	0.488449	0.251729	1.94037	0.0523343	0.477391
ENSMUSG00000067780	Pi15	533.331	-0.703467	0.362609	-1.94001	0.0523779	0.477391
ENSMUSG00000026173	Plcd4	168.192	-1.48176	0.764447	-1.93834	0.0525816	0.47866
ENSMUSG00000028964	Park7	3147.31	-0.43629	0.225105	-1.93816	0.0526031	0.47866
ENSMUSG00000032353	Tmed3	3924.24	0.283258	0.146205	1.9374	0.0526959	0.479215
ENSMUSG00000001909	Trmt1	466.513	0.302528	0.156189	1.93694	0.052753	0.479269
ENSMUSG00000022867	Usp25	1175.39	-0.25466	0.131494	-1.93666	0.0527868	0.479269
ENSMUSG00000027510	Rbm38	973.186	-0.462171	0.238654	-1.93658	0.052797	0.479269
ENSMUSG00000024793	Tnfrsf25	58.3498	0.829626	0.428633	1.93552	0.0529268	0.479869
ENSMUSG00000069045	Ddx3y	1680.1	-0.257631	0.133102	-1.93559	0.052918	0.479869
ENSMUSG00000070923	Klhl9	1192.93	-0.244311	0.126251	-1.93512	0.0529752	0.48002
ENSMUSG00000025381	Cnpy2	1622.67	0.247013	0.127684	1.93457	0.0530432	0.480348
ENSMUSG00000029096	Htra3	3422.12	0.260229	0.134545	1.93415	0.0530949	0.480528
ENSMUSG00000010492	Uckl1os	226.74	-0.652846	0.337742	-1.93297	0.0532395	0.480637
ENSMUSG00000020359	Phykpl	331.329	-0.301191	0.15581	-1.93307	0.053228	0.480637
ENSMUSG00000037736	Limch1	3206.43	-0.244276	0.126421	-1.93224	0.0533299	0.480637
ENSMUSG00000059327	Eda	154.289	0.405753	0.209945	1.93267	0.053277	0.480637
ENSMUSG00000059742	Kcnh7	20.221	-2.05219	1.06195	-1.93247	0.0533012	0.480637
ENSMUSG00000084128	Esrp2	13.1398	2.74465	1.41992	1.93296	0.0532406	0.480637
ENSMUSG00000105814	Mir703	38.1813	0.71591	0.37048	1.93239	0.0533118	0.480637
ENSMUSG00000021098	4930447C04Rik	31.4499	0.790417	0.409726	1.92914	0.0537139	0.481963
ENSMUSG00000021733	Slc4a7	459.044	-0.367604	0.190568	-1.92899	0.0537323	0.481963
ENSMUSG00000025190	Got1	2572.79	-0.32526	0.16846	-1.93079	0.0535095	0.481963
ENSMUSG00000027134	Lpcat4	172.218	0.377156	0.195443	1.92975	0.0536383	0.481963
ENSMUSG00000030678	Maz	2127.99	0.202113	0.1047	1.9304	0.0535577	0.481963
ENSMUSG00000038594	Cep85l	231.419	-0.495708	0.256971	-1.92904	0.0537255	0.481963
ENSMUSG00000043613	Mmp3	242.2	0.594352	0.308099	1.92909	0.0537192	0.481963
ENSMUSG00000073002	Vamp5	687.078	-0.378504	0.196171	-1.92947	0.0536731	0.481963
ENSMUSG00000030615	Tmem126a	472.518	-0.407542	0.2114	-1.92782	0.0538771	0.482402
ENSMUSG00000037260	Hgsnat	993.719	0.296867	0.153987	1.92788	0.0538706	0.482402
ENSMUSG00000063077	Kif1b	6534.45	-0.331934	0.172136	-1.92833	0.0538146	0.482402
ENSMUSG00000033590	Myo5c	27.5003	-1.07326	0.556913	-1.92717	0.053959	0.482454
ENSMUSG00000051243	Islr2	230.834	0.411503	0.213545	1.92701	0.0539788	0.482454
ENSMUSG00000059534	Uqcr10	2139.32	-0.341797	0.177346	-1.92729	0.053944	0.482454
ENSMUSG00000001403	Ube2c	1483.65	-0.568175	0.295088	-1.92544	0.0541741	0.482926
ENSMUSG00000019470	Xab2	513.377	0.280685	0.145876	1.92414	0.054337	0.482926
ENSMUSG00000022477	Aco2	11308.1	-0.376356	0.195586	-1.92425	0.0543238	0.482926
ENSMUSG00000023800	Tiam2	372.192	-0.349888	0.18174	-1.92521	0.0542025	0.482926
ENSMUSG00000025359	Pmel	30.852	1.16879	0.607049	1.92537	0.0541833	0.482926
ENSMUSG00000036860	Mrpl55	339.055	-0.323396	0.168043	-1.92449	0.0542937	0.482926
ENSMUSG00000036943	Rab8b	852.641	-0.263335	0.136867	-1.92402	0.0543515	0.482926
ENSMUSG00000038028	Tigar	457.657	-0.489127	0.254009	-1.92563	0.0541508	0.482926
ENSMUSG00000041528	Rnf123	1024.69	-0.378977	0.1968	-1.9257	0.0541421	0.482926
ENSMUSG00000086741	Gm15816	20.6074	-1.05305	0.547208	-1.9244	0.0543043	0.482926
ENSMUSG00000038172	Ttc39b	805.173	0.321911	0.167487	1.922	0.0546057	0.484613
ENSMUSG00000049871	Nlrc3	257.963	-0.540729	0.281336	-1.92201	0.0546047	0.484613
ENSMUSG00000021010	Npas3	71.7257	0.563581	0.293328	1.92133	0.0546896	0.484788
ENSMUSG00000038855	Itpkb	2338.88	-0.220397	0.114708	-1.92138	0.0546839	0.484788
ENSMUSG00000019787	Trdn	5675.82	-0.545056	0.283805	-1.92053	0.0547913	0.48512
ENSMUSG00000020154	Ptprb	3624.33	-0.368034	0.191608	-1.92077	0.0547611	0.48512
ENSMUSG00000009863	Sdhb	3607.75	-0.342604	0.17843	-1.9201	0.0548456	0.485316
ENSMUSG00000028919	Arhgef19	539.465	-0.27411	0.142854	-1.91881	0.0550085	0.485903
ENSMUSG00000032383	Ppib	2269.41	0.204592	0.106602	1.9192	0.0549589	0.485903
ENSMUSG00000046207	Pik3r6	187.486	0.418018	0.217843	1.9189	0.0549972	0.485903
ENSMUSG00000034353	Ramp1	1204.89	0.378109	0.197104	1.91832	0.05507	0.485975
ENSMUSG00000038375	Trp53inp2	6750.06	-0.37153	0.193692	-1.91815	0.0550924	0.485975
ENSMUSG00000047514	Tspyl1	1468.04	-0.230732	0.120299	-1.91798	0.0551132	0.485975
ENSMUSG00000034807	Colgalt1	2205.87	0.210878	0.11	1.91706	0.0552298	0.486435
ENSMUSG00000035569	Ankrd11	2823.81	0.21211	0.110642	1.91709	0.0552268	0.486435
ENSMUSG00000004980	Hnrnpa2b1	8114.6	-0.22144	0.115585	-1.91582	0.0553881	0.487261
ENSMUSG00000035673	Sbno2	652.873	0.293401	0.15313	1.91603	0.0553618	0.487261
ENSMUSG00000013367	Iglon5	47.4121	0.671616	0.350721	1.91495	0.0554983	0.487661
ENSMUSG00000036957	Lrfn3	117.4	0.467689	0.244223	1.91501	0.0554917	0.487661
ENSMUSG00000019194	Scn1b	4479.12	-0.410858	0.214823	-1.91254	0.055807	0.490089
ENSMUSG00000014813	Stc1	46.5699	-0.675296	0.353568	-1.90995	0.0561403	0.490733
ENSMUSG00000028597	Gpx7	1459.2	0.302526	0.158336	1.91065	0.0560493	0.490733
ENSMUSG00000033752	Mnd1	79.3691	0.534275	0.279603	1.91084	0.0560254	0.490733
ENSMUSG00000043015	Nemp2	72.4927	0.489533	0.256255	1.91033	0.0560904	0.490733
ENSMUSG00000054277	Arfgap3	1375.75	-0.308034	0.161191	-1.91098	0.0560068	0.490733
ENSMUSG00000061458	Nol10	242.499	0.32855	0.171937	1.91087	0.0560207	0.490733
ENSMUSG00000063015	Ccni	3311.21	0.2053	0.107457	1.91054	0.0560642	0.490733
ENSMUSG00000070385	Ampd1	1723.87	-1.13072	0.59202	-1.90994	0.0561405	0.490733
ENSMUSG00000036095	Dgkb	68.365	-0.759647	0.397944	-1.90893	0.0562711	0.491591
ENSMUSG00000038039	Gcc2	426.663	-0.277337	0.145388	-1.90757	0.056447	0.492557
ENSMUSG00000043088	Il17re	26.0438	-0.892283	0.467758	-1.90757	0.0564465	0.492557
ENSMUSG00000025154	Arhgap19	256.697	-0.655419	0.343637	-1.9073	0.0564817	0.492575
ENSMUSG00000026072	Il1r1	656.264	-0.346148	0.181566	-1.90646	0.0565906	0.492955
ENSMUSG00000030036	Mogs	357.753	0.313223	0.164274	1.90671	0.0565586	0.492955
ENSMUSG00000035456	Prdm8	78.2648	0.813709	0.426975	1.90575	0.0566823	0.493185
ENSMUSG00000038205	Prkab2	794.352	-0.665126	0.348986	-1.90588	0.0566658	0.493185
ENSMUSG00000020838	Slc6a4	33.628	0.777125	0.408083	1.90433	0.0568672	0.494104
ENSMUSG00000051537	Gm5124	26.5562	0.78774	0.413644	1.90439	0.0568592	0.494104
ENSMUSG00000065037	Rn7sk	170.958	-0.666616	0.35008	-1.90418	0.0568861	0.494104
ENSMUSG00000029394	Cdk2ap1	906.629	0.309826	0.162825	1.90282	0.0570637	0.495361
ENSMUSG00000003970	Rpl8	8864.09	0.297534	0.156392	1.90248	0.0571081	0.495462
ENSMUSG00000032299	Commd4	334.105	0.323978	0.170328	1.90208	0.0571609	0.495635
ENSMUSG00000046314	Stxbp6	546.752	-0.316032	0.166273	-1.90068	0.0573443	0.49694
ENSMUSG00000025616	Usp16	906.746	-0.269196	0.14169	-1.89989	0.0574476	0.497549
ENSMUSG00000021495	Fam193b	524.056	0.347862	0.183157	1.89926	0.0575305	0.497982
ENSMUSG00000001750	Tcirg1	404.811	0.315529	0.166237	1.89807	0.0576869	0.498193
ENSMUSG00000024027	Glp1r	14.7014	-1.10162	0.58027	-1.89846	0.0576358	0.498193
ENSMUSG00000039278	Pcsk1n	40.0736	0.958401	0.504868	1.89832	0.057654	0.498193
ENSMUSG00000054675	Tmem119	2759.5	-0.26304	0.138578	-1.89814	0.0576777	0.498193
ENSMUSG00000039361	Picalm	3493.47	-0.249646	0.131552	-1.8977	0.0577351	0.498324
ENSMUSG00000083012	Fam220a	909.689	-0.298	0.157079	-1.89713	0.057811	0.498695
ENSMUSG00000037216	Lipt1	65.2228	-0.516407	0.272316	-1.89636	0.0579131	0.49929
ENSMUSG00000024529	Lox	27903.8	-0.545308	0.287644	-1.89577	0.0579901	0.499386
ENSMUSG00000061474	Mrps36	381.873	-0.350311	0.184786	-1.89577	0.0579905	0.499386
ENSMUSG00000071415	Rpl23	6247.14	0.311965	0.1646	1.89529	0.0580539	0.499647
ENSMUSG00000048747	E130114P18Rik	46.037	-0.61494	0.324535	-1.89483	0.0581148	0.499887
ENSMUSG00000031066	Usp11	149.041	0.369494	0.195228	1.89263	0.0584066	0.501023
ENSMUSG00000037152	Ndufc1	982.643	-0.303125	0.160185	-1.89234	0.0584461	0.501023
ENSMUSG00000054814	Usp46	480.042	0.293156	0.15491	1.89243	0.0584339	0.501023
ENSMUSG00000058799	Nap1l1	2426.6	0.214129	0.113093	1.8934	0.0583052	0.501023
ENSMUSG00000063235	Ptpmt1	489.656	-0.26537	0.140229	-1.8924	0.0584371	0.501023
ENSMUSG00000086584	Gm12002	80.8568	-0.505095	0.266808	-1.8931	0.0583447	0.501023
ENSMUSG00000022090	Pdlim2	371.042	-0.371245	0.196277	-1.89144	0.0585663	0.501769
ENSMUSG00000028028	Alpk1	112.784	-0.500622	0.264798	-1.89058	0.0586803	0.50246
ENSMUSG00000024425	Ndfip1	2608.86	-0.217118	0.114944	-1.8889	0.058905	0.503373
ENSMUSG00000039481	Nrtn	336.787	-0.391484	0.207203	-1.88937	0.0588421	0.503373
ENSMUSG00000049600	Zbtb45	194.949	0.342606	0.181376	1.88892	0.0589019	0.503373
ENSMUSG00000062169	Cnih4	574.262	-0.260392	0.137862	-1.88879	0.0589202	0.503373
ENSMUSG00000004996	Mri1	235.74	0.411954	0.218481	1.88554	0.0593574	0.506248
ENSMUSG00000013593	Ndufs2	5631.85	-0.387207	0.205336	-1.88573	0.059332	0.506248
ENSMUSG00000037907	Ankrd13b	395.195	0.301057	0.159648	1.88575	0.059328	0.506248
ENSMUSG00000020646	Mboat2	93.1114	0.494485	0.262696	1.88234	0.0597892	0.507334
ENSMUSG00000021592	Arsk	168.785	0.472806	0.251125	1.88275	0.0597343	0.507334
ENSMUSG00000021830	Txndc16	711.23	0.349807	0.185661	1.88411	0.0595494	0.507334
ENSMUSG00000024160	Spsb3	218.175	-0.396592	0.210775	-1.88159	0.0598911	0.507334
ENSMUSG00000028893	Sesn2	288.758	0.406154	0.215643	1.88345	0.0596393	0.507334
ENSMUSG00000029614	Rpl6	6696.92	0.25731	0.136767	1.88137	0.0599216	0.507334
ENSMUSG00000052698	Tln2	2008.83	-0.263332	0.139923	-1.88198	0.0598386	0.507334
ENSMUSG00000054659	Pm20d2	164.303	-0.57597	0.305853	-1.88316	0.0596791	0.507334
ENSMUSG00000057863	Rpl36	3281.21	0.34329	0.182233	1.88379	0.0595931	0.507334
ENSMUSG00000066829	Zfp810	108.264	0.47175	0.250515	1.88312	0.0596837	0.507334
ENSMUSG00000068036	Afdn	2089.31	0.214554	0.113958	1.88275	0.0597345	0.507334
ENSMUSG00000070003	Ssbp4	1092.38	0.314033	0.166837	1.88227	0.0597992	0.507334
ENSMUSG00000097906	Gm9625	264.502	2.23741	1.18913	1.88155	0.0598966	0.507334
ENSMUSG00000032526	Ss18l2	344.898	-0.300876	0.159951	-1.88106	0.0599644	0.507412
ENSMUSG00000020153	Ndufs7	2626.74	-0.329911	0.175439	-1.88049	0.0600413	0.507778
ENSMUSG00000024378	Stard4	550.335	-0.337439	0.179569	-1.87916	0.0602229	0.509029
ENSMUSG00000005705	Agrp	16.1968	1.3919	0.7409	1.87866	0.0602904	0.509314
ENSMUSG00000020593	Lpin1	1513.44	-0.402832	0.214531	-1.87773	0.0604179	0.509809
ENSMUSG00000022312	Eif3h	2653.87	0.252989	0.134748	1.87749	0.0604503	0.509809
ENSMUSG00000107002	0610012G03Rik	1058.58	-0.336313	0.179092	-1.87787	0.0603983	0.509809
ENSMUSG00000025610	Map3k7cl	749.568	-0.679927	0.362464	-1.87585	0.0606761	0.511142
ENSMUSG00000031231	Cox7b	2411.67	-0.328388	0.175053	-1.87593	0.0606644	0.511142
ENSMUSG00000024537	Psmg2	242.177	0.353586	0.188554	1.87525	0.0607577	0.511544
ENSMUSG00000035572	Dcaf10	603.054	-0.285784	0.152447	-1.87464	0.0608418	0.511967
ENSMUSG00000072694	1500011B03Rik	138.779	0.542287	0.289315	1.87438	0.0608775	0.511981
ENSMUSG00000075225	Ccdc162	22.8187	-0.849328	0.453313	-1.8736	0.0609854	0.512603
ENSMUSG00000023755	Rhebl1	48.4437	0.634054	0.338521	1.87301	0.0610665	0.512999
ENSMUSG00000028150	Rorc	404.936	-0.271193	0.144818	-1.87265	0.0611173	0.513141
ENSMUSG00000025885	Myo5b	45.9891	0.900528	0.480961	1.87235	0.061158	0.513197
ENSMUSG00000028167	Bdh2	81.3303	0.597846	0.319362	1.872	0.0612059	0.513314
ENSMUSG00000024780	Cdc37l1	755.897	-0.281916	0.15073	-1.87034	0.0614367	0.514486
ENSMUSG00000027247	Arhgap1	871.435	0.310497	0.165976	1.87074	0.0613816	0.514486
ENSMUSG00000049115	Agtr1a	178.614	-0.429357	0.229601	-1.87001	0.061482	0.514486
ENSMUSG00000086922	Gm13835	56.1579	0.952176	0.509178	1.87002	0.0614804	0.514486
ENSMUSG00000056121	Fez2	1469.84	-0.258415	0.138261	-1.86904	0.0616177	0.515336
ENSMUSG00000006587	Snai3	88.8681	-0.620342	0.33202	-1.86839	0.061708	0.515519
ENSMUSG00000020592	Sdc1	5847.97	0.237449	0.127075	1.86858	0.0616816	0.515519
ENSMUSG00000005986	Ankrd13d	29.5499	0.825824	0.442921	1.8645	0.0622521	0.516122
ENSMUSG00000007617	Homer1	496.559	-0.458269	0.245846	-1.86405	0.0623146	0.516122
ENSMUSG00000020411	Nipal4	16.5217	1.47153	0.788439	1.86639	0.0619872	0.516122
ENSMUSG00000022540	Rogdi	154.114	0.411295	0.220466	1.86557	0.0621013	0.516122
ENSMUSG00000023004	Tuba1b	2588.1	-0.316262	0.169669	-1.86399	0.062323	0.516122
ENSMUSG00000025290	Rps24	5571.91	0.291304	0.156229	1.8646	0.0622379	0.516122
ENSMUSG00000027230	Creb3l1	5061.68	0.339228	0.181993	1.86396	0.0623271	0.516122
ENSMUSG00000028885	Smpdl3b	343.842	-0.329313	0.17644	-1.86643	0.0619813	0.516122
ENSMUSG00000031111	Igsf1	242.966	0.539075	0.289061	1.86492	0.0621925	0.516122
ENSMUSG00000037681	Esyt3	19.3595	-0.926173	0.495921	-1.86758	0.0618208	0.516122
ENSMUSG00000038250	Usp38	351.201	-0.317784	0.170273	-1.86633	0.0619959	0.516122
ENSMUSG00000050212	Eva1b	1764.51	0.28741	0.154145	1.86454	0.0622455	0.516122
ENSMUSG00000056899	Immp2l	68.1694	-0.628342	0.336577	-1.86686	0.0619212	0.516122
ENSMUSG00000063838	1700027J19Rik	260.041	0.355133	0.190455	1.86466	0.0622294	0.516122
ENSMUSG00000085956	4930481B07Rik	19.5117	-1.29289	0.69333	-1.86476	0.0622156	0.516122
ENSMUSG00000111293	Gm34006	15.5498	1.10289	0.590623	1.86733	0.061856	0.516122
ENSMUSG00000004864	Mapk13	33.5305	1.00672	0.540182	1.86367	0.062368	0.516177
ENSMUSG00000027994	Mcub	162.217	0.428527	0.230036	1.86287	0.0624811	0.516555
ENSMUSG00000067242	Lgi1	191.145	-0.569918	0.305937	-1.86286	0.062482	0.516555
ENSMUSG00000000253	Gmpr	700.444	-0.382069	0.205469	-1.8595	0.0629561	0.51669
ENSMUSG00000000275	Trim25	663.442	0.289029	0.155237	1.86185	0.0626239	0.51669
ENSMUSG00000003452	Bicd1	45.8747	0.704059	0.378643	1.85943	0.0629663	0.51669
ENSMUSG00000018565	Elp5	591.606	-0.252092	0.135526	-1.8601	0.0628711	0.51669
ENSMUSG00000022912	Pros1	1709.02	0.210496	0.113159	1.86018	0.0628604	0.51669
ENSMUSG00000024712	Rfk	1161.67	-0.271117	0.145582	-1.86229	0.0625619	0.51669
ENSMUSG00000025789	St8sia2	27.7691	0.945827	0.508005	1.86185	0.0626248	0.51669
ENSMUSG00000030199	Etv6	484.82	0.241128	0.129598	1.86058	0.0628032	0.51669
ENSMUSG00000031352	Hccs	505.057	-0.28011	0.150649	-1.85935	0.0629776	0.51669
ENSMUSG00000032306	Mpi	647.932	-0.38112	0.204913	-1.85991	0.0628979	0.51669
ENSMUSG00000037922	Bank1	18.5312	-0.93711	0.503709	-1.86042	0.0628262	0.51669
ENSMUSG00000038274	Fau	4621.64	0.360033	0.193534	1.86031	0.0628424	0.51669
ENSMUSG00000039509	Nup133	401.743	-0.248277	0.133439	-1.8606	0.0628008	0.51669
ENSMUSG00000045062	Pcdhb7	62.8897	0.592052	0.318357	1.85971	0.0629266	0.51669
ENSMUSG00000014313	Cox6c	3365.39	-0.344591	0.185376	-1.85887	0.0630457	0.516706
ENSMUSG00000039496	Cdnf	294.238	-0.49777	0.267784	-1.85885	0.0630479	0.516706
ENSMUSG00000004071	Cdip1	1038.85	-0.219286	0.11816	-1.85584	0.0634761	0.51786
ENSMUSG00000020963	Tshr	241.549	0.809673	0.435994	1.85707	0.0633005	0.51786
ENSMUSG00000024258	Polr2d	523.777	-0.284861	0.153546	-1.85521	0.0635661	0.51786
ENSMUSG00000025041	Nt5c2	596.571	-0.290015	0.156281	-1.85573	0.0634918	0.51786
ENSMUSG00000025348	Itga7	2441.73	-0.237716	0.128037	-1.85661	0.0633661	0.51786
ENSMUSG00000027531	Impa1	487.039	-0.246504	0.13278	-1.85648	0.0633849	0.51786
ENSMUSG00000031725	Ces1f	84.1511	1.01172	0.545267	1.85546	0.0635309	0.51786
ENSMUSG00000031875	Cmtm3	802.33	0.252908	0.136321	1.85523	0.0635628	0.51786
ENSMUSG00000054641	Mmrn1	590.526	-0.406837	0.219219	-1.85585	0.0634752	0.51786
ENSMUSG00000079038	D130040H23Rik	23.5969	-0.826499	0.445044	-1.85712	0.0632944	0.51786
ENSMUSG00000090257	Gm4524	177.146	-0.40166	0.216466	-1.85553	0.0635208	0.51786
ENSMUSG00000028247	Coq3	303.4	-0.366134	0.197395	-1.85483	0.06362	0.518019
ENSMUSG00000028991	Mtor	1025.72	-0.281736	0.152027	-1.8532	0.0638543	0.519492
ENSMUSG00000030470	Csrp3	3881.67	0.945624	0.510362	1.85285	0.0639041	0.519492
ENSMUSG00000033953	Ppp3r1	2124.13	-0.225573	0.121732	-1.85303	0.0638781	0.519492
ENSMUSG00000030281	Il17rc	516.194	0.244184	0.131846	1.85204	0.0640201	0.520143
ENSMUSG00000033102	Cdc14b	213.642	0.322409	0.174105	1.85181	0.0640531	0.520143
ENSMUSG00000029405	G3bp2	942.987	-0.238825	0.129021	-1.85106	0.0641608	0.520737
ENSMUSG00000001138	Cnnm3	426.39	0.300965	0.162818	1.84847	0.0645341	0.520825
ENSMUSG00000004364	Cul3	2018.08	-0.27407	0.148211	-1.84918	0.0644314	0.520825
ENSMUSG00000018042	Cyb5r3	6473.81	0.329395	0.178234	1.8481	0.0645875	0.520825
ENSMUSG00000021610	Clptm1l	2287.17	0.224894	0.121717	1.84768	0.0646487	0.520825
ENSMUSG00000022449	Adamts20	263.77	-0.537885	0.290737	-1.85008	0.0643027	0.520825
ENSMUSG00000026577	Blzf1	561.216	-0.282475	0.152701	-1.84986	0.0643333	0.520825
ENSMUSG00000027971	Ndst4	12.1013	-1.24716	0.674389	-1.84931	0.0644128	0.520825
ENSMUSG00000034707	Gns	2773.47	0.20988	0.113571	1.84801	0.064601	0.520825
ENSMUSG00000038121	Fam210a	1666.76	-0.346358	0.187442	-1.84781	0.0646297	0.520825
ENSMUSG00000038607	Gng10	311.903	-0.319573	0.172963	-1.84764	0.0646546	0.520825
ENSMUSG00000042182	Bend6	59.4794	0.68861	0.372171	1.85025	0.0642774	0.520825
ENSMUSG00000052572	Dlg2	60.8688	-0.524486	0.283591	-1.84945	0.0643933	0.520825
ENSMUSG00000056427	Slit3	1667.9	0.256401	0.138677	1.8489	0.0644719	0.520825
ENSMUSG00000056665	Them6	159.808	-0.513063	0.277324	-1.85005	0.0643066	0.520825
ENSMUSG00000014956	Ppp1cb	4689.48	-0.227141	0.123005	-1.8466	0.0648052	0.521482
ENSMUSG00000020918	Kat2a	398.882	0.273247	0.147969	1.84665	0.064798	0.521482
ENSMUSG00000031197	Vbp1	739.942	-0.266741	0.14448	-1.84621	0.0648619	0.52166
ENSMUSG00000003070	Efna2	45.9766	0.724372	0.392479	1.84564	0.0649452	0.521774
ENSMUSG00000028136	Snx27	1074.12	-0.248927	0.134873	-1.84564	0.064944	0.521774
ENSMUSG00000027978	Prss12	121.754	0.583935	0.316559	1.84463	0.0650907	0.522665
ENSMUSG00000026930	Gpsm1	624.574	0.260151	0.141107	1.84364	0.0652359	0.523363
ENSMUSG00000039158	Akna	220.643	0.338662	0.1837	1.84356	0.065247	0.523363
ENSMUSG00000007908	Hmgcll1	37.7876	0.66569	0.361207	1.84296	0.0653347	0.523368
ENSMUSG00000010914	Pdhx	851.057	-0.379268	0.205757	-1.84328	0.0652882	0.523368
ENSMUSG00000025577	Cbx2	65.458	0.594772	0.322773	1.84269	0.0653737	0.523368
ENSMUSG00000058064	Gm10036	216.301	0.74115	0.402229	1.84261	0.0653863	0.523368
ENSMUSG00000052563	D930048N14Rik	47.0419	0.745507	0.404757	1.84186	0.065495	0.52396
ENSMUSG00000040287	Stac3	1573.53	-0.489174	0.265706	-1.84104	0.0656159	0.5246
ENSMUSG00000070822	Zscan18	32.6158	0.715103	0.388465	1.84084	0.0656445	0.5246
ENSMUSG00000095597	Gm6472	357.819	1.69317	0.92	1.8404	0.0657091	0.524839
ENSMUSG00000017132	Cyth1	815.388	-0.220558	0.119859	-1.84014	0.065747	0.524863
ENSMUSG00000038949	Cnst	902.681	-0.283392	0.154051	-1.8396	0.065827	0.525107
ENSMUSG00000055240	Zfp101	131.3	0.443659	0.24119	1.83946	0.0658471	0.525107
ENSMUSG00000025141	Myadml2	464.68	-0.435981	0.237082	-1.83895	0.0659228	0.525433
ENSMUSG00000049517	Rps23	5448.46	0.298975	0.162639	1.83827	0.0660228	0.525953
ENSMUSG00000003316	Glg1	5917.93	0.157611	0.0858074	1.8368	0.0662392	0.527214
ENSMUSG00000086825	Gm15675	51.9085	0.620576	0.337871	1.83672	0.066251	0.527214
ENSMUSG00000022817	Itgb5	5735.42	0.20249	0.110374	1.83458	0.066568	0.527871
ENSMUSG00000025903	Lypla1	1136.54	-0.238627	0.130019	-1.83533	0.0664567	0.527871
ENSMUSG00000026672	Optn	879.408	-0.282982	0.154248	-1.8346	0.0665657	0.527871
ENSMUSG00000031838	Ifi30	948.366	0.244054	0.133069	1.83404	0.0666483	0.527871
ENSMUSG00000034771	Tle2	196.183	0.340653	0.185738	1.83405	0.066646	0.527871
ENSMUSG00000040435	Ppp1r15a	430.214	0.329179	0.179452	1.83436	0.0666008	0.527871
ENSMUSG00000051985	Igfn1	37.5953	2.86932	1.56379	1.83485	0.0665276	0.527871
ENSMUSG00000067288	Rps28	3568.69	0.306224	0.166818	1.83568	0.0664057	0.527871
ENSMUSG00000079641	Rpl39	2969.54	0.274646	0.149617	1.83565	0.0664092	0.527871
ENSMUSG00000021200	Asb2	1587.37	-0.513712	0.280363	-1.83231	0.0669051	0.527966
ENSMUSG00000029185	Fam114a1	3835.96	-0.183942	0.100353	-1.83294	0.0668117	0.527966
ENSMUSG00000030091	Nup210	149.511	-0.695126	0.379093	-1.83366	0.0667051	0.527966
ENSMUSG00000035458	Tnni3	43.8691	0.65709	0.358459	1.8331	0.0667884	0.527966
ENSMUSG00000045569	Mc2r	28.4247	0.974647	0.531881	1.83245	0.0668841	0.527966
ENSMUSG00000055421	Pcdh9	126.424	-0.459868	0.250921	-1.83272	0.0668441	0.527966
ENSMUSG00000101856	1700096K18Rik	92.2943	0.473976	0.258601	1.83284	0.066826	0.527966
ENSMUSG00000002057	Foxn1	13.3091	7.15944	3.91006	1.83103	0.0670965	0.528547
ENSMUSG00000027186	Elf5	13.3091	7.15944	3.91006	1.83103	0.0670965	0.528547
ENSMUSG00000031461	Myom2	5250.9	-0.915588	0.5	-1.83118	0.0670743	0.528547
ENSMUSG00000037712	Fermt2	3897.16	-0.20777	0.113491	-1.83071	0.0671438	0.528547
ENSMUSG00000081534	Slc48a1	2341.11	0.259879	0.14196	1.83064	0.0671537	0.528547
ENSMUSG00000019795	Pcmt1	1625.28	-0.273412	0.14943	-1.8297	0.0672943	0.528551
ENSMUSG00000023971	Rrp36	312.826	0.30194	0.165009	1.82984	0.0672737	0.528551
ENSMUSG00000036299	BC031181	1041.85	-0.257869	0.140892	-1.83026	0.0672116	0.528551
ENSMUSG00000038845	Phb	1582.36	-0.273007	0.149173	-1.83013	0.0672305	0.528551
ENSMUSG00000029821	Gsdme	247.4	0.340313	0.186026	1.82938	0.0673424	0.528554
ENSMUSG00000048776	Pthlh	98.0719	0.477037	0.260785	1.82923	0.0673647	0.528554
ENSMUSG00000071847	Apcdd1	685.564	0.327663	0.179262	1.82784	0.0675731	0.529914
ENSMUSG00000020019	Ntn4	1370.5	-0.259464	0.14199	-1.82734	0.0676489	0.529957
ENSMUSG00000051022	Hs3st1	176.155	-0.553505	0.302896	-1.82737	0.0676437	0.529957
ENSMUSG00000019841	Rev3l	887.453	-0.317383	0.173987	-1.82417	0.0681256	0.531385
ENSMUSG00000028266	Lmo4	1141.01	0.243299	0.133328	1.82482	0.0680289	0.531385
ENSMUSG00000030744	Rps3	7782.97	0.281255	0.154087	1.82529	0.0679568	0.531385
ENSMUSG00000031969	Acad8	578.225	-0.262199	0.143734	-1.8242	0.0681225	0.531385
ENSMUSG00000042717	Ppp1r3a	1186.25	-0.511003	0.280151	-1.82403	0.0681479	0.531385
ENSMUSG00000043587	Pxylp1	217.85	0.575831	0.315569	1.82474	0.0680408	0.531385
ENSMUSG00000069670	Nkain2	16.6443	-1.36397	0.747681	-1.82427	0.0681118	0.531385
ENSMUSG00000071226	Cecr2	147.488	-0.410306	0.224798	-1.82522	0.0679672	0.531385
ENSMUSG00000091264	Smim13	807.264	-0.322592	0.176798	-1.82464	0.0680553	0.531385
ENSMUSG00000024909	Efemp2	1381.66	0.265023	0.145463	1.82192	0.0684669	0.533596
ENSMUSG00000097275	Gm26648	15.9192	1.05046	0.576787	1.82123	0.068572	0.53414
ENSMUSG00000025138	Sirt7	357.285	0.271995	0.149401	1.82057	0.0686717	0.534265
ENSMUSG00000037762	Slc16a9	147.828	-0.344115	0.188995	-1.82077	0.0686422	0.534265
ENSMUSG00000046417	Lrrc75a	458.116	0.280724	0.154208	1.82043	0.0686942	0.534265
ENSMUSG00000002771	Grin2d	220.748	0.374767	0.206036	1.81894	0.0689206	0.534752
ENSMUSG00000020124	Usp15	1151.6	-0.325059	0.178755	-1.81846	0.0689934	0.534752
ENSMUSG00000022620	Arsa	563.577	0.308584	0.169634	1.81912	0.0688927	0.534752
ENSMUSG00000023079	Gtf2ird1	321.323	0.324092	0.17823	1.81839	0.0690048	0.534752
ENSMUSG00000025794	Rpl14	5220.17	0.244638	0.134509	1.81875	0.0689501	0.534752
ENSMUSG00000028744	Pqlc2	156.293	0.343514	0.188769	1.81976	0.068796	0.534752
ENSMUSG00000060639	Hist1h4i	114.678	-0.83286	0.457778	-1.81935	0.0688578	0.534752
ENSMUSG00000021241	Isca2	335.011	-0.28464	0.156599	-1.81764	0.0691198	0.535266
ENSMUSG00000029561	Oasl2	113.099	0.682121	0.375405	1.81703	0.069213	0.535266
ENSMUSG00000034563	Ccpg1	286.174	-0.349062	0.192101	-1.81708	0.0692053	0.535266
ENSMUSG00000069682	Gm10275	45.0493	0.677657	0.372924	1.81714	0.0691953	0.535266
ENSMUSG00000018395	Kif3a	300.872	0.273982	0.1509	1.81566	0.0694231	0.536341
ENSMUSG00000020925	Ccdc43	525.57	-0.348338	0.191839	-1.81579	0.0694032	0.536341
ENSMUSG00000027378	Nphp1	429.023	0.247702	0.136511	1.81451	0.0695988	0.537287
ENSMUSG00000028572	Hook1	99.8901	-0.484587	0.267215	-1.81347	0.069759	0.537287
ENSMUSG00000031600	Vps37a	598.585	-0.219426	0.120977	-1.81378	0.0697114	0.537287
ENSMUSG00000062647	Rpl7a	6545.31	0.226888	0.125074	1.81403	0.069673	0.537287
ENSMUSG00000098274	Rpl24	1118.33	0.286649	0.158	1.81424	0.0696414	0.537287
ENSMUSG00000110195	Pde2a	113.821	-0.517747	0.285492	-1.81352	0.0697509	0.537287
ENSMUSG00000041779	Tram2	1133.08	0.250395	0.138125	1.81281	0.0698607	0.537796
ENSMUSG00000031286	Glt28d2	119.09	-0.421557	0.232582	-1.81251	0.0699072	0.537879
ENSMUSG00000023951	Vegfa	1582.53	-0.293301	0.161905	-1.81157	0.0700529	0.538177
ENSMUSG00000025217	Btrc	587.724	-0.277215	0.153022	-1.8116	0.0700477	0.538177
ENSMUSG00000032238	Rora	2452.63	-0.244885	0.135176	-1.8116	0.0700487	0.538177
ENSMUSG00000027068	Dhrs9	172.021	0.677666	0.37417	1.81112	0.0701228	0.53844
ENSMUSG00000022383	Ppara	87.283	-0.638422	0.352575	-1.81074	0.0701809	0.538613
ENSMUSG00000014158	Trpv4	336.402	-0.396972	0.219281	-1.81033	0.070244	0.53866
ENSMUSG00000031591	Asah1	1509.9	0.258607	0.142858	1.81024	0.0702585	0.53866
ENSMUSG00000033615	Cplx1	41.3918	0.65467	0.361745	1.80975	0.0703342	0.538694
ENSMUSG00000078622	Ccdc47	1620.47	-0.222712	0.123057	-1.80983	0.0703222	0.538694
ENSMUSG00000044813	Shb	219.33	0.378937	0.209528	1.80852	0.0705255	0.539885
ENSMUSG00000034343	Ube2f	646.241	-0.324608	0.179564	-1.80776	0.0706434	0.540047
ENSMUSG00000045672	Col27a1	553.317	-0.242035	0.133867	-1.80803	0.070602	0.540047
ENSMUSG00000050830	Vwc2	46.2897	-0.844004	0.466895	-1.8077	0.070654	0.540047
ENSMUSG00000029486	Mrpl1	285.312	-0.338702	0.187485	-1.80655	0.070832	0.541134
ENSMUSG00000031601	Cnot7	609.16	-0.238453	0.132056	-1.80571	0.0709644	0.541669
ENSMUSG00000040618	Pck2	1890.88	0.455201	0.252122	1.80548	0.0709991	0.541669
ENSMUSG00000045410	Akr1e1	195.822	0.330408	0.183009	1.80542	0.0710097	0.541669
ENSMUSG00000032333	Stoml1	318.869	0.285492	0.158294	1.80355	0.0713013	0.543618
ENSMUSG00000042271	Nxt2	248.407	-0.356289	0.197641	-1.8027	0.0714348	0.544361
ENSMUSG00000042035	Igsf3	274.038	0.331575	0.183968	1.80235	0.0714902	0.544509
ENSMUSG00000041241	Mul1	700.918	-0.24178	0.134339	-1.79977	0.0718975	0.547058
ENSMUSG00000046743	Fat4	1598.97	0.266472	0.148042	1.79998	0.0718639	0.547058
ENSMUSG00000021577	Sdha	7924.67	-0.382815	0.212937	-1.79779	0.0722106	0.547859
ENSMUSG00000029221	Slc30a9	1438.73	-0.220594	0.122689	-1.79799	0.0721787	0.547859
ENSMUSG00000031987	Egln1	2769.52	-0.271887	0.151239	-1.79773	0.0722204	0.547859
ENSMUSG00000036114	Rpp25l	284.864	-0.31354	0.174306	-1.79879	0.0720517	0.547859
ENSMUSG00000063160	Numbl	1221.21	0.24291	0.135088	1.79816	0.072152	0.547859
ENSMUSG00000103851	Gm37606	29.6429	0.90731	0.504673	1.79782	0.0722059	0.547859
ENSMUSG00000019823	Mical1	1188.1	-0.288751	0.160668	-1.79719	0.0723051	0.548226
ENSMUSG00000033350	Chst2	482.288	-0.275063	0.153077	-1.79689	0.072353	0.548313
ENSMUSG00000050550	Gm11868	29.0946	-1.641	0.913761	-1.79587	0.0725154	0.549269
ENSMUSG00000070493	Chchd2	3390.9	-0.221343	0.123302	-1.79513	0.0726334	0.549886
ENSMUSG00000048100	Taf13	456.541	-0.276091	0.153912	-1.79382	0.0728422	0.551191
ENSMUSG00000028848	Gpn2	181.888	0.328614	0.183286	1.79291	0.0729879	0.551642
[truncated: 13,570 more rows]
