# Supplementary material for: Tendon and motor phenotypes in the Crtap-/- mouse model of recessive osteogenesis imperfecta
Source: eLife. 2021 May 26;10:e63488. doi: 10.7554/eLife.63488 (PMC8186905; doi:10.7554/eLife.63488)
Supplement: Figure 6—source data 2. — Based on a list of differentially expressed genes, upstream regulators were predicted using Ingenuity Pathway Analysis. The results are sorted by adjusted p-value. [file elife-63488-fig6-data2.xlsx]

## Sheet: Sheet1
Figure 6-source data 2. Predicted upstream regulators driving differential gene expression between 1-month wildtype and Crtap knockout Achilles tendons.
Upstream regulators predicted using Ingenuity Pathway Analysis, and sorted by adjusted p-value.
Upstream Regulator	Expr Log Ratio	Molecule Type	Predicted Activation State	Activation z-score	Bias-corrected z-score	p-value of overlap	Target molecules in dataset	Mechanistic Network
TGFB1	0.466	growth factor	Activated	2.979	2.951	2.58e-19	ACE,ACPP,ACTC1,ACVR1,ACVRL1,ADAMTS3,ADCY9,AGTR2,AK1,ALB,ALDOA,ALOX12,AMD1,ANPEP,ANXA11,ANXA8/ANXA8L1,APLN,APP,ARG1,ARHGEF2,ARNT2,ASPN,ASS1,BAX,BCL2,BGN,BMP6,CADM1,Calm1 (includes others),CALML3,CALML4,CAT,CCN2,CCND1,CD163,CD28,CD44,CDH11,CDH2,CEBPB,CHI3L1,CHST3,CITED2,CKM,CNN2,COL12A1,COL16A1,COL1A2,COL2A1,COMP,CPT1B,CPXM1,CST3,CTNND1,CTSD,CTSK,CYC1,DAB2,DDIT4,DKK3,DSC2,DSG2,EDNRB,EEF1A1,EGR2,EHM…	AHR,CREBBP,ESR1,IL1A,NFkB (complex),PPARGC1A,RB1,SMAD7,SP1,TAF4,TGFB1,TP53,Tgf beta,estrogen receptor
PPARGC1A	-0.47	transcription regulator	Inhibited	-4.432	-4.444	1.59e-17	ACADVL,ACAT1,ADAMTS1,AK1,ALAS1,ASPN,ATP5F1A,ATP5PO,BAX,BNIP3,CAT,CCN2,CEBPB,COL1A2,COL2A1,COMP,Cox5b,CPT1B,CPXM1,CS,CTSA,CXCL14,CYCS,DIO2,DLAT,EGFL6,Esrra,FABP3,FIBIN,FNDC5,FREM1,HK2,HMOX1,IDH3A,IGFBP3,IGFBP5,IRS1,IRS2,KCNK1,LDHA,LIFR,LUM,MAP2K6,MB,MCM6,MFAP5,MMP2,MYH1,NDUFB8,NDUFS1,NDUFV2,OGN,PDGFRL,PDHA1,PGAM1,PIK3R1,PLIN5,PODN,POSTN,PRDX5,PRKAA2,PVALB,RBP4,RUNX2,SERPINA3,SERPINE2,SLC2A4,SOD2,S…	Akt,ESRRA,FOXM1,NFkB (complex),PPARA,PPARGC1A,PPARGC1B,RB1,RUNX2,SP1,TP53,YBX1,estrogen receptor,palmitic acid
HTT	0.034	transcription regulator		1.267	1.256	6.06e-16	ADAM23,ALDOA,AMD1,APP,ATL2,ATP5F1A,ATP5PO,ATP8A1,ATPAF1,BASP1,BCL2,C1QTNF3,CA4,CALML4,CAMK2A,CAMK2B,CCK,CCN2,CCND1,Cd24a,CDH11,CDK5,CEBPB,CITED2,CKM,CLCN1,COCH,COL16A1,COX4I2,Cox8b,CTSD,CYC1,CYCS,CYFIP2,DIO2,DKK3,DLST,DUSP6,ECRG4,EDNRB,EEF1A1,EEF2,EGR2,ENO3,ENPP2,EPB41L3,Esrra,FGF1,FGFR1,Foxp1,FXYD6,GADD45G,GAPDH,GCLC,GNG7,GPD2,GRIN2A,HIVEP2,HSP90AB1,IDH3A,IGFBP5,KCNA1,KCNB1,KCNC4,KCNJ12,KL,LDHA,…
beta-estradiol		chemical - endogenous mammalian		0.217	0.188	2.19e-15	ABLIM1,ACADVL,ACE,ACPP,ACTC1,ADA,ADAMTS1,ADCY9,ADM2,AEBP1,AGTR2,ALB,ALDOA,ANK1,ANPEP,ANXA1,APP,AQP5,AR,ARG1,ARHGEF2,ARNT2,ART3,ASCL1,ATF5,ATP5PB,BACE2,BAX,BAZ1A,BCL2,BMPR1B,C2orf88,CALR,CAMK2A,CBX6,CCN2,CCND1,CCNG1,CD276,CD44,CDH11,CDH2,CDK5,CEBPB,CHI3L1,CITED1,CITED2,CKM,CLCN1,CLCN3,CLDND1,CLIC5,CLSTN2,CNN2,CNTFR,COCH,COL13A1,COL1A2,COL4A5,COMP,CPT1B,CPXM1,CRABP2,CRIM1,CTNND1,CTSD,CTSK,CUZD1,CYC…
PDGF BB		complex		1.43	1.401	4.39e-15	ANXA11,ASCL1,BMP6,CCN2,CCND1,CD44,CEBPB,CTH,CYCS,DAB2,DCBLD2,DUSP6,EDNRB,EGR2,ENPP1,FBLN5,FGF2,FGF7,FGFR1,FRZB,FXYD5,FZD1,GADD45A,GEM,GJA5,GREM1,H19,HMOX1,ID3,IGFBP4,KLHL21,LIF,MAP2,MCM6,MICOS10-NBL1/NBL1,MMP14,MMP2,Mt1,Mt2,MYH1,NAMPT,NDUFB8,NOX4,NPR3,PCGF2,PDGFRB,PHLDA1,PLAT,POSTN,PRSS35,RACK1,RBP1,RPN2,RPS6,RXRG,SERPINA3,SGK1,SLC29A1,SNAI1,SOD2,TGFB1,TGM2,TIMM17A,TIMP1,TNC,TOB1,TP53,TRIB3,UGDH,…
sirolimus		chemical drug		-1.732	-1.698	2.4e-14	ACADVL,ADA,APP,AQP2,AR,ARG1,ASS1,ATP6AP2,ATP6V1A,BAX,BCL2,CCN2,CCND1,CEBPB,COL1A2,CTSK,CYCS,DDIT4,DDT,DPP7,EEF1A1,EEF2,FGF2,FGF9,GATA3,GCLC,HK2,HMOX1,HSP90AB1,HSP90B1,ID1,IGFBP5,IRS1,IRS2,KL,LCN2,LDHA,LEPR,MAF,MMP14,MMP2,Mt1,NCAM1,NDUFA9,NPM1,PDGFRB,PDHA1,PFKP,PGAM2,PGK1,PGM1,PIK3R1,POSTN,PRDX5,RACK1,RCAN2,RPL19,RPL27A,RPL35,RPL41,RPN2,RPS10,RPS12,RPS15,RPS19,RPS26,RPS27A,RPS5,RPS6,RPS8,RPS9,RPSA…	AHR,Akt,ERK,FOXM1,NFkB (complex),P38 MAPK,PPARGC1A,RB1,RUNX2,SP1,TP53,YBX1,estrogen receptor,sirolimus
DMD	-0.149	other	Inhibited	-3.512	-3.522	1.02e-13	Actn3,AIG1,AQP4,ARHGAP20,ATP1B2,ATP2A1,BGN,CACNA2D1,CAMK2B,CAPN3,CASQ1,COL1A2,CYFIP2,EEF1A1,GJA5,GRHL1,H19,IP6K3,KCNA7,KCNC1,KY,LAMP2,LIF,Marcks,MLF1,MSI2,MYBPC2,MYH1,MYH4,MYL1,MYOZ1,P2RY2,PAMR1,PHKG1,PLPP3,POSTN,PPP1R14C,PPP1R3C,PVALB,PYGM,RIPOR2,SCHIP1,SERPINA1,SGSH,SLC2A4,SLN,SNTA1,SYNM,TMOD4,TPI1,TUBA8,WFDC1,XK
MYC	0.425	transcription regulator		0.743	0.711	1.28e-13	ABCB9,ABCG4,ACAT1,ACVR1,ADAMTS1,AIMP2,ALB,ALDOA,AMD1,APP,AR,ARG1,ASCL1,ASPRV1,ASS1,BAX,BCL2,CCND1,CD44,CD47,CDH2,CHST15,CITED1,CLEC3B,COL14A1,COL1A2,COL2A1,CRABP2,CST6,CTDSPL,CTSD,CTSV,CYCS,CYFIP2,CYP26A1,DDIT4,DDX3X,DUSP6,EEF2,EGR2,EPHB3,F2R,FAP,FBLN5,FBN1,FGFR1,FRZB,FSTL1,FXYD1,GAA,GADD45A,GADD45G,GAPDH,GCK,GCLC,GFPT1,GLS2,GM2A,H19,HIVEP2,HK2,HMOX1,ID1,ID3,IER5,IQGAP2,IRS1,IRX3,ITGBL1,LAMP2,LDH…
CTNNB1	0.132	transcription regulator		1.256	1.225	1.56e-13	ACADVL,ACAT1,ACTC1,ADRA2C,ANXA1,APP,AQP4,AQP5,AR,ARMH4,ASCL1,BCL2,BGN,CA9,CADM1,CCN2,CCND1,CD44,CD47,CDH11,CDH2,CNMD,CNN2,CNTFR,COL2A1,COL4A5,CPT1B,CRABP2,CRYBG1,CTDSPL,CTSZ,CXCL14,CYFIP2,DIO2,DIXDC1,ECRG4,EDIL3,ELOVL3,ENO3,ENPP1,ENPP2,EPHB2,EPHB3,EYA2,F13A1,F2R,FGF18,FGF9,GADD45G,GAPDH,GATA3,GCK,GREM1,HK2,HTATIP2,HTRA1,ID1,ID3,IGFBP5,IRS1,KLK3,LEF1,LIF,MEOX1,MMP14,MMP16,MMP2,MTMR7,NCAM1,NPTX1,NR…
TNF	-0.522	cytokine		0.96	0.93	1.44e-12	ABR,ACADVL,ACE,ADAMTS8,AEBP1,ALB,ANPEP,ANXA1,ANXA11,APLN,APP,AQP5,AR,ARG1,ASS1,ATP5PF,BAX,BBOX1,BCL2,BCL2L2,BGN,BMP6,BPGM,CALR,CAT,CCK,CCN2,CCND1,CD163,CD28,CD44,CD47,CDH11,CDH2,CEBPB,CERS4,CHI3L1,CIB2,CISH,CITED2,CKM,CMBL,COL16A1,COL1A2,COL2A1,COL4A3,CPT1B,CREB3L3,CRISPLD2,CTDSPL,CTSK,CTSZ,CYP26B1,DCBLD2,DEPP1,DPP4,DSC2,DSC3,DUSP6,EDIL3,EDNRB,EGR2,ENPP2,EPHB2,ERG,ESM1,EXT1,FADS1,FGF18,FGF2,FGFR1…
RICTOR	0.081	other		-0.46	-0.427	2.07e-12	AR,ATP5F1A,ATP5MC3,ATP5PB,ATP5PF,ATP5PO,ATP6V0A4,ATP6V1A,BAX,COX11,COX4I2,Cox5b,COX7A1,CYC1,GCK,HK2,IRS2,LEPR,NDUFA5,NDUFA8,NDUFA9,NDUFAB1,NDUFB2,NDUFB6,NDUFB8,NDUFB9,NDUFC2,NDUFS1,NDUFS3,NDUFS4,NDUFV2,PFKL,RPL12,RPL17,Rpl29 (includes others),Rpl34 (includes others),RPL4,RPL41,RPL9,RPLP2,RPS10,RPS15,RPS19,RPS26,RPS27A,Rps3a1,RPS4Y1,RPS5,RPS6,RPS8,RPS9,RPSA,SGK1,SNAI1,UQCRC1,UQCRC2,UQCRFS1,VCAM1
TLE3	0.012	other				8.78e-12	ATP5F1A,ATP5MC3,ATP5PB,ATP5PF,ATP5PO,Cox8b,CYC1,CYCS,DIO2,ETFDH,NDUFA12,NDUFA5,NDUFA8,NDUFA9,NDUFAB1,NDUFAF1,NDUFB2,NDUFB6,NDUFB9,NDUFC2,NDUFS1,NDUFS3,NDUFS4,NDUFV2,UCP2,UQCRC1,UQCRC2,UQCRFS1
TP53	0.4	transcription regulator	Activated	3.736	3.728	1.6e-11	ABCB4,ACADVL,ACAT1,ACE,ADA,AK1,AK4,ALB,ALDOA,ANK1,ANTXR1,ANXA1,ANXA8/ANXA8L1,APP,AQP2,AR,ARHGEF2,ARRB1,ASS1,ATP5F1A,ATP5MC3,ATP5PB,BAX,BCL2,BNIP3,CA9,CAMK2B,CAT,CCN2,CCND1,CCNG1,CD44,CD47,CEBPB,CITED2,CKM,CMBL,CNN2,COL13A1,COL14A1,COL1A2,COL2A1,COL9A1,COX11,Cox5b,COX7A1,Cox8b,CPOX,CPT1B,CS,CTSD,CTSK,CYFIP2,CYP26B1,CYSLTR1,DDIT4,DDX3X,DKK3,DLAT,DLD,DLST,DNAJC15,DPP4,DSC3,DUSP6,EDIL3,EEF1A1,EGFL6,E…	CREBBP,ESR1,IKBKB,IL1A,MYOD1,NFkB (complex),NR4A3,P38 MAPK,PPARGC1A,RB1,RUNX2,SP1,TAF4,TP53,estrogen receptor
UCP1		transporter	Activated	2.318	2.311	2.46e-11	ALAS1,AMD1,ARHGAP33,ARHGEF2,ATF5,CAPN3,Cd24a,CHCHD10,CLCN3,CTH,CTSV,CYB5R1,DKK3,EEF1A1,FGF7,FUT1,GADD45A,GNMT,GSTO1,KLHL8,MYH1,MYH4,NDUFB8,NDUFS3,PGLS,PHGDH,PSAT1,SLC3A2,SLN,SMOX,SMS,SMYD2,STBD1,STYX,SYNM,TENM4,TGFB1,TRIB3,UCP2,UQCRC1,UQCRC2
NFKBIA	0.293	transcription regulator		0.126	0.111	3.1e-11	AEBP1,BAX,BCL2,BCL2L2,BNIP3,CAPZA2,CCND1,CEBPB,CHI3L1,CITED4,COL1A2,COL2A1,CREB3L3,CTSZ,DDX3X,DUSP6,ENPP2,ESM1,FGF2,GADD45A,GADD45G,GM2A,GPR176,GRN,HK2,HMOX1,IL33,IRAK1,IRX3,JDP2,JRK,KCNH2,KCNN4,LCN2,LIF,LIFR,LIMA1,LITAF,LYNX1,MGP,MMP14,MSC,Mt1,Mt2,NAGLU,OGN,PDHA1,PIK3R1,PLAT,PLD3,PMEPA1,PTP4A2,PTX3,RBP1,RGS3,RPL27A,RPSA,S100A8,SDC4,SERPINE2,SGK1,SLC12A2,SLC1A2,SOAT1,SOD2,TAC1,TFRC,TGFB1,TIMP1,TI…
FOS	-1.018	transcription regulator		-0.354	-0.369	5.52e-11	ALAS1,APLN,CADM1,CAT,CCN2,CCND1,CCNG1,CD164,CD44,CERS4,CHI3L1,CHODL,COL16A1,COL8A2,CRABP1,CRABP2,CTH,CTNND1,CTSV,CYCS,DDX3X,DIO2,EGR2,ELOVL3,ESM1,FBN1,FGF2,FLRT2,FRZB,FSTL1,GAS2,GM2A,HK2,HMOX1,HSP90B1,HTATIP2,IBSP,IGFBP5,IRS2,KCNN4,KIRREL3,LAMP2,LTBP1,LTBP2,LTBP3,LYPD6,MET,MLH1,MMP2,Mt2,NAA80,NAMPT,NIPSNAP1,NPTX1,NPTX2,PDPN,PGAM2,PHLDA1,PLAT,PMEPA1,PTP4A2,RAB31,RBP1,RGMA,RPL9,RPS6,RPS9,RUNX1,S100…
OGA	-0.093	enzyme		1.494	1.497	6.68e-11	ABCC9,ABLIM1,ADAMTS17,AGTR2,AHNAK2,ASS1,BAX,BCL2,CCBE1,CCND1,Cd24a,CD44,CD47,CDK5,CEBPB,CRABP1,CREB3L2,CREG2,CYFIP2,DAB2,DCLK1,DLST,EGR2,EPHB3,FABP3,FGF18,FGF9,FGFR1,GAA,GADD45A,GADD45G,GNE,HIGD1A,HIPK2,HIVEP2,HSD17B1,HSP90AB1,IDH3A,IGFBP3,IGFBP4,IGFBP5,IL17RD,IP6K3,JAK1,JDP2,LIF,LRP4,MMP14,NDUFA5,NDUFA9,NDUFB9,NDUFC2,NDUFS1,NDUFS4,NOTCH2,PDHA1,PHKB,PIK3R1,PLAAT3,PLCE1,PLPP3,RBP4,SERPINE2,SMTNL1,…
Tgf beta		group	Activated	2.597	2.578	8.26e-11	BASP1,BCL2,BGN,CCN2,CCND1,CDH11,CDH2,CEBPB,COL12A1,COL1A2,CTSK,DAB2,EGR2,FGF2,FSTL1,GATA3,GCLC,GREM1,GUSB,HMOX1,HSPG2,HTATIP2,ID1,ID3,IGFBP3,IGFBP4,IGFBP5,JAK1,LIF,Ly6a (includes others),MAF,MET,MMP11,MMP14,MMP2,NEDD9,NOX4,PLAT,PLPP3,PMEPA1,POSTN,PPP1R13L,PTGER2,RUNX1,RUNX2,SGK1,SMTN,SNAI1,SPP1,TFRC,TGFB1,TIMP1,TIMP2,TNFRSF11B,VCAM1	CREBBP,ERK,ESR1,NFkB (complex),P38 MAPK,PI3K (complex),RB1,RUNX2,SMAD7,SP1,TAF4,TGFB1,TP53,Tgf beta,estrogen receptor
cycloheximide		chemical reagent		-1.526	-1.519	9.18e-11	ACTC1,ALB,ALDOA,APP,AQP4,AQP5,AR,ASS1,BAX,BEX3,CALR,CAMK2A,CAT,CCK,CCN2,CCND1,CD44,CEBPB,CITED2,CKM,COL2A1,DDIT4,DIO2,EEF1A1,EEF1D,ERG,FGF2,FGFR1,GADD45A,GADD45G,GCLC,GLB1,GRASP,HEXA,HMOX1,IBSP,IGFBP4,IGFBP5,IRS2,KLK3,LCN2,LDHA,MMP11,MMP2,Mt1,MYOC,NPM1,OGN,OPA1,PDGFRB,PGK1,PLAT,PTGS1,PTX3,RUNX2,S100A8,SPP1,TGFB1,TGFBR2,Tgtp1/Tgtp2,TIMP1,TNFAIP2,TNFRSF11B,TOB1,TP53,VCAM1,VDR	AHR,CREBBP,ESR1,FOXM1,IKBKB,NFkB (complex),P38 MAPK,PPARGC1A,RB1,RUNX2,SP1,TAF4,TP53,YBX1,cycloheximide,estrogen receptor
dexamethasone		chemical drug		1.493	1.478	1.22e-10	ABCB4,ACAT1,ACE,ACOT7,ACTC1,Actn3,ADAMTS1,AEBP1,ALAS1,ALB,ANGPTL7,ANO1,ANPEP,ANXA1,APLN,APP,AQP5,ARHGEF2,ARRB1,ASPH,ASPN,BAX,BCL2,BCL2L2,BEX3,BGN,BNIP3,Calm1 (includes others),CALR,CAT,Cbr2,CCK,CCN2,CCND1,CD163,CD44,CD47,CDH11,CDH2,CDK5,CEBPB,CHAD,CHI3L1,CILP,CISH,CNN2,COL1A2,COL4A3,COL4A5,COL9A2,Cox5b,Cox8b,CPT1B,CRABP2,CRISPLD2,CRYBG1,CST3,CTSD,CTSK,CTSV,CXCL14,CYCS,CYP26A1,CYSLTR1,DALRD3,DDIT4…
MYCN	0.094	transcription regulator		1.89	1.881	2.08e-10	ABCB9,ABCG4,ALDOA,BASP1,BAX,CCN2,CCND1,CDH11,CITED2,CRIM1,DKK3,EEF1A1,EEF1D,EEF2,EIF3C,FBN1,GAPDH,HK2,HSP90AB1,KLK3,LDHA,MMP2,MRC2,NCAM1,NPM1,PDIA4,PHGDH,RPL12,RPL17,RPL19,RPL27A,RPL35,RPL4,RPL41,RPL9,RPLP2,RPS12,RPS15,RPS19,RPS26,RPS5,RPS6,RPS8,RPS9,SDC2,SLC1A2,SLC25A19,TGM2,TIMP2,TP53,TPI1,UCHL1	ESR1,FOXM1,MYCN,NFkB (complex),PARP1,RB1,SP1,TP53,YBX1
IL1B		cytokine		-0.418	-0.445	1.35e-09	ACPP,ADAMTS1,ADAMTS3,ANTXR1,ANXA1,APP,AQP4,ARG1,ASS1,ATF5,BAX,BCL2,BGN,CASR,CAT,CCN2,Cd24a,CD44,CEBPB,CHI3L1,CHST6,CISH,COL2A1,CTSZ,CYSLTR1,DAB2,DDIT4,DPP4,ENPP1,ENPP2,F13A1,FGF18,FGF2,FGF7,GADD45A,GATA3,GBP6,GCK,GCLC,GEM,GM2A,GRN,GUSB,H1-10,H19,HEXA,HEXB,HK2,HMOX1,HSPG2,IBSP,ID3,IGFBP3,IGFBP4,IGFBP5,IL33,IRAK1,IRS1,IRS2,KCNH2,LCN2,LDHA,LIF,LIFR,MAP2K6,MAPK14,METRNL,MFAP2,MMP11,MMP14,MMP2,Mt1,Mt2…
OSM		cytokine		0.128	0.108	2.37e-09	ACE,ADAMTS1,ADAMTS3,ALB,ANXA1,ARG1,ARHGEF2,ARTN,BBOX1,BCL2,CA6,CAT,CCND1,CDH2,CHI3L1,CISH,CKM,CNTN6,COL1A2,COL2A1,CST6,CTSV,DEGS1,DHRS7,DNASE1L2,DSC2,ECM2,EPHA1,EPHB2,FGF2,GADD45G,GFPT1,GRHPR,GRIN2A,HK2,HMOX1,ID1,IGFBP3,IL33,IRAK1,IRS1,KCNG1,LCN2,LDLRAD4,LIF,LIFR,LITAF,LMO1,LY6D,MAP2,MAPK14,MMP2,MPP2,MSC,Mt2,NAMPT,NELL2,PDPN,PGK1,RAB31,RUNX1,S100A8,SERPINA1,SERPINA3,SLC16A3,SLC39A7,SLC4A8,SLPI,SP…
APP	0.206	other		-0.35	-0.367	2.58e-09	AK1,ALB,ALDOA,APP,ARG1,ASCL1,ATP5F1A,ATP5PF,ATP6V1A,BACE2,BASP1,BAX,BCL2,BCL2L2,BMP6,CALML3,CALML4,CALR,CAT,CCN2,CCND1,CD44,CDC14A,CDH2,CDK5,CITED2,COL13A1,CRABP1,CRABP2,CS,CTSD,CTSV,CYCS,CYFIP2,CYP26B1,DDAH1,DYNLL2,ECE2,ELOVL4,ENPP2,EPHB2,EXT1,FABP3,FAP,FCGR2A,FGF2,FGFR1,Foxp1,FXYD1,FZD1,GAPDH,GBP6,GRIN2A,H19,H4C9,HIPK2,HIVEP3,HMOX1,HSP90AB1,HSPG2,IGFBP5,IRS2,KCNB1,KCNC4,KL,KLK3,LDHA,LEF1,LHFPL2…
dihydrotestosterone		chemical - endogenous mammalian		-0.3	-0.322	3.4e-09	ACADVL,ACPP,ADAMTS1,AIG1,ALAS1,ALDOA,AMHR2,ANO1,APP,AR,ARG1,ASCL1,ATP2A1,BASP1,BAX,BCL2,BGN,BMPR1B,CCN2,CCND1,CDH2,CHI3L1,CKM,CST6,DIO2,DPP4,F2R,FGF2,FGF7,FGFR1,Foxp1,GAPDH,Gm12854/S100a11,GNMT,GRN,HERC3,HK2,IGFBP3,IGFBP4,IGFBP5,IQGAP2,IRS1,IRS2,KCNH2,KLK3,LDHA,LEF1,LTBP1,MAF,MMP2,Mt1,MYH4,OXT,PAM,PHGDH,PHLDA1,PMEPA1,POSTN,ROM1,RPL12,RPL19,RPL9,RPLP2,RPS12,RPS26,Rps3a1,RPS4Y1,RUNX1,RUNX2,SERPINB6…
ESR2		ligand-dependent nuclear receptor		0.587	0.578	6.63e-09	ABLIM1,ACTC1,ADAMTS1,ADH7,ANK1,ANPEP,AR,ARNT2,ATF5,BCL2,CCN2,CCND1,CDH2,CHST15,CLIC5,COL13A1,COL16A1,COL1A2,COMP,CRIM1,CTSD,CYP26B1,DAB2,DDAH1,EHMT2,ENPP2,EPHA3,FGFR1,GCLC,GLB1,GM2A,HOXD11,IBSP,IGFBP3,IGFBP4,IP6K3,JAK1,KAZALD1,KLK3,LRATD1,LTBP1,MAP2K6,MAPK14,MDK,MICOS10-NBL1/NBL1,MMP14,MMP2,MYH1,NEDD9,NELL2,NIPSNAP1,OXT,PCBD1,PLAT,POLD4,PPP1R3C,PSAT1,PTGFR,PTX3,RBP4,RTN2,RUNX2,SFRP4,SGK1,SLC25A4,…
YAP1	0.014	transcription regulator		1.474	1.46	6.75e-09	ACAT1,ADAMTS1,BAX,BMPR1B,CCN2,CCND1,CRIM1,DAB2,DDAH1,FGF1,GADD45A,ID1,JAK1,LDHA,LIFR,MCM6,OXNAD1,RPL12,RPL17,RPL19,RPL27A,Rpl29 (includes others),RPL35,RPL4,RPL41,RPL9,RPLP2,RPS10,RPS12,RPS15,RPS19,RPS26,RPS27A,Rps3a1,RPS4Y1,RPS5,RPS6,RPS8,RPS9,RPSA,SGK1,TFRC,TP63,VCAM1,WTIP,WWTR1
EGFR	0.255	kinase		-0.516	-0.537	1.49e-08	ACOT7,Actn3,AHCTF1,AMD1,ANXA1,AR,ARG1,BAX,BCL2,CAPZA2,CCN2,CCND1,CD47,CEBPB,CHI3L1,CMA1,CST3,CTSK,CXCL14,DSC2,DSG2,F2R,FAP,FBN1,FGF7,GADD45A,GRN,HK2,HSP90B1,ID1,IGFBP3,IGFBP4,IGFBP5,IL33,IQGAP2,KCNN4,KLK3,LCN2,LEF1,MATN2,MET,MMP14,MMP2,NDUFB8,PABPC1,PLAT,POSTN,PRKCZ,PTGER2,PTGS1,RUNX1,RUNX2,SERPINA3,SERPINE2,SLPI,SNAI1,TGM2,TNC,TNFRSF11B,TNNT3,TNXB,Tpsab1,UQCRC2,VDR
KRAS	-0.111	enzyme		-1.284	-1.287	1.53e-08	AHCTF1,AIMP2,ALDOA,ANPEP,ANXA8/ANXA8L1,AQP5,ARG1,BCL2,BGN,BNIP3,CCN2,CCND1,CD44,CDH2,CEBPB,CHI3L1,CHSY1,CLIC5,COL4A3,CPT1B,CS,CXCL14,DCLK1,DDAH1,DUSP6,EEF1A1,EGFL6,EGR2,FBN1,FCGR2A,FGF7,FGFR1,FLT3LG,FSTL1,GADD45A,GAPDH,GCLC,GFPT1,GRN,H3C1,HEXA,HK2,HMOX1,ID1,IL33,IQGAP2,KCNN4,LAMP2,LCN2,LDHA,LEF1,LIF,LIPG,Ly6a (includes others),MAPK14,MET,MICOS10-NBL1/NBL1,MMP2,NCAM1,P3H3,PABPC1,PDIA3,PDPN,PFKL,PG…
progesterone		chemical - endogenous mammalian		1.358	1.345	1.56e-08	ABCB4,ACAT1,ACE,ACOT7,ACPP,ADAMTS1,AEBP1,AMD1,AR,ART3,BAX,BCL2,CADM1,CCND1,CCNG1,CDH11,CDH2,CEBPB,CITED2,CREB3L2,CST3,CTDSPL,CTSV,CYP26A1,CYP2F1,DPP4,ECE2,ELL2,ENC1,ENPP1,ENPP2,F2R,FRAT2,GAL,GNMT,GRINA,H19,ID1,ID3,IGFBP3,IGFBP5,INMT,IRS1,IRS2,ITGA11,KCNG1,KCNH2,KCNK1,KLF11,KLK3,LCN2,LDHA,LDLRAD4,LEPR,LIF,LITAF,MCM6,MICOS10-NBL1/NBL1,MMP2,MYO1D,NCAM1,NEDD9,NUDT3,OXT,PARM1,PDHA1,PDPN,PIK3R1,PLPP3,P…
D-glucose		chemical - endogenous mammalian		-0.295	-0.311	1.66e-08	ACE,ADA,ALDOA,ANO1,ANXA1,APLN,APP,ART3,ASS1,ATF5,ATP6AP2,BAX,BCL2,CALR,CAPZA2,CAT,CCN2,CCND1,CEBPB,COL2A1,CPT1B,CTSV,DDIT4,EFHD1,ENPP2,FBP2,FGF2,FUT1,GAPDH,GCK,GFPT1,GREM1,GRN,HK2,HMOX1,ID1,IRS1,IRS2,LDHA,LRP1,MAFB,MMP14,MMP2,Mt1,Mt2,NAMPT,NDUFB9,NOX4,PDGFRB,PDIA3,PDIA4,PFKL,PFKP,PGAM1,PGK1,PGM1,PPP1R14A,PRKAA2,PRKCZ,RUNX2,S100A8,SARS1,SGK1,SLC25A4,SLC29A1,SLC2A4,SLC37A4,SLC39A7,SLC3A2,SOD2,SPP1,…
AGT	-0.181	growth factor		1.284	1.257	2.27e-08	ACE,ADAM23,AGTR2,ALOX12,ANO1,ANXA1,APLN,AQP2,BAX,BCL2,BGN,BMP6,CACNA2D1,Calm1 (includes others),CALR,CAT,CCN2,CCND1,CD44,COL1A2,Cox5b,COX7A1,CRABP2,DAB2,EDNRB,FGF2,FGF7,FRAT2,GABRB3,GAS2,GFPT1,HMOX1,HSPG2,ID3,IGFBP3,IGFBP4,IGFBP5,KL,LAMP2,LEPR,LIF,MAP2,MATN2,MMP2,NAMPT,NOX4,NPR3,NREP,OXT,PIK3R1,POSTN,PPP1R3C,PTGFR,PTGS1,RBP4,SGK1,SLC14A2,SLC9A1,SOD2,SOX6,SPP1,SRGAP3,TFRC,TGFB1,TGFBR2,TIMP1,TP53,U…
TAZ	0.029	enzyme		-0.853	-0.868	2.27e-08	ADAMTS1,AHNAK2,ANXA1,ARNT2,BASP1,CCN2,CD44,CDH2,COX4I2,COX7A1,ENPP2,ESM1,HMOX1,IRS1,LDHA,LUM,MET,MFAP5,PGM1,PTX3,RUNX2,SERPINB7,SNAPC1,SORBS2,TGFB1,TPI1,UGDH
NRG1		growth factor	Activated	2.282	2.262	2.51e-08	ACAT1,AR,ARHGEF2,ARTN,ASCL1,BCL2,BNIP3,CCN2,CCND1,CHCHD3,COL4A3,CRIM1,DAB2,DDAH1,DUSP6,EEF1A1,EGR2,ENO3,FGF1,FGF2,FSTL1,GDF5,HEXB,HK2,HMOX1,ID1,IDH3B,IMMT,KLK3,LIFR,LIMK2,MAF,NDUFS1,PGAM2,PHGDH,PHKG1,PYGM,ROM1,RUNX1,SCHIP1,SGK1,SGSH,SLC2A4,SLIT2,SNAI1,TGM2,TNFAIP1,TSPAN3	AHR,Akt,ERK,ESR1,NFkB (complex),NRG1,P38 MAPK,PI3K (complex),PPARGC1A,RUNX2,SP1,TP53,estrogen receptor
WNT3A		cytokine		0.918	0.895	2.54e-08	ACADVL,ADM2,APP,BCL2,BGN,CALR,CAVIN4,CCN2,CCND1,CD44,CDH2,CEBPB,COL2A1,CPT1B,CTH,CYP2F1,DCLK1,DDIT4,ECRG4,EGR2,FGF18,FZD1,GADD45G,ID1,IGFBP5,IRS1,IRS2,IRX3,JDP2,KCTD12,LCN2,LEF1,MMP14,NCAM1,NDNF,OGN,PMEPA1,RUNX1,RUNX1T1,RUNX2,SDC4,SLPI,TGFB1,TNC,TNFRSF11B,TNFRSF19,TNXB,TRIB3,VCAM1,WIF1,ZCCHC12
torin1		chemical reagent	Activated	4.081	4.112	2.62e-08	ALDOA,ATP5PB,ATP5PF,BPGM,CCND1,CDH2,CYC1,DLAT,GAPDH,HK2,LDHA,NDUFA8,NDUFA9,NDUFAB1,NDUFB2,NDUFB8,NDUFC2,PDHA1,PFKL,PFKP,PGAM1,PGK1,RPS6,TPI1,UQCRFS1
metribolone		chemical reagent	Inhibited	-4.987	-5.029	2.73e-08	ACPP,ADAMTS1,ADSL,ALDOA,APP,AR,ATP5PB,ATP5PF,BAX,BCAP29,BCL2,BMPR1B,BPGM,CA4,CCND1,CPOX,CYC1,DLAT,DLD,EDEM3,ELL2,ETFDH,GADD45G,GALE,GAPDH,GFPT1,GNMT,GRHPR,HK2,IDH3A,IGFBP5,IRS2,KLK3,LDHA,LIFR,MAF,MMP2,MPC2,NDUFA8,NDUFA9,NDUFAB1,NDUFB2,NDUFB8,NDUFC2,NDUFV2,NNMT,NTHL1,PDHA1,PFKL,PFKP,PGAM1,PGK1,PMEPA1,RGMA,RRAGD,SLC16A3,SLC37A4,SMS,SUCLG1,TIMP2,TP53,TPI1,UAP1,UGDH,UQCRC1,UQCRC2,UQCRFS1	ESR1,MYOD1,NFkB (complex),NR4A3,PARP1,PAX5,PIK3R1,RB1,SP1,TP53,metribolone
mifepristone		chemical drug		-1.053	-1.042	5.89e-08	ACE,ALAS1,ANXA1,AR,ARG1,BAX,BCL2,Cbr2,CCN2,CCND1,Cd24a,CDH2,CEBPB,CHI3L1,CISH,CLEC3B,COL2A1,CTNND1,CTSD,DDIT4,DIO2,DKK3,EDNRB,EGR2,EPHB3,FGF2,GAL,GLB1,IGFBP3,IRS2,KLF11,KLK3,LRP1,Ly6a (includes others),Mt1,NOX4,OGN,OXT,PLAT,POSTN,PTGER2,PTGS1,PTX3,ROBO1,RUNX2,SFRP4,SLC1A2,SNAI1,SPP1,TENM3,TGFB1,TIMP1,TP53,VDR
rosiglitazone		chemical drug	Inhibited	-3.786	-3.803	6.22e-08	ABCC9,ACADVL,ADA,ADAMTS1,AQP2,ARG1,BAX,BCL2,CAT,CCN2,CCND1,CD164,CKM,COL1A2,Cox5b,COX7A1,Cox8b,CPT1B,CS,CYCS,DIO2,DLD,ELOVL3,ETFDH,FABP3,FGF1,GAPDH,GATA3,GCK,HMOX1,IDH3A,IDH3B,IGFBP5,IRS1,IRS2,KLF11,KLK3,LCN2,LDHA,LNPEP,LRP1,MAN1C1,MCM6,MET,NDUFS1,NOX4,PDGFRB,PDHA1,PIK3R1,PLIN5,PLPP3,POSTN,RBP4,RUNX2,S100A8,SERPINF1,SGK1,SLC27A3,SLC27A6,SLC2A4,SLC9A1,SNAI1,SOAT1,SOD2,TIMP1,TNC,UCP2,UQCRC1,UQCRC2,…	Akt,ESRRA,IRS1,NFkB (complex),PPARA,PPARGC1A,RUNX2,SP1,TP53,palmitic acid,rosiglitazone
mono-(2-ethylhexyl)phthalate		chemical toxicant	Inhibited	-3.55	-3.585	7.24e-08	ACADVL,AR,ATP5PB,BAX,BCL2,CPT1B,CS,CYC1,DDIT4,Esrra,FADS1,FBP2,GAPDH,GCK,GFPT1,HIPK2,HK2,IDH3A,IDH3G,IRS2,LRP1,NAMPT,NDUFB9,NDUFS1,NDUFV2,PGAM2,PGK1,PPTC7,SLC2A4,SUCLG1,TIMP2,TPI1,UQCRC1,UQCRC2,UQCRFS1	ESRRA,PPARA,PPARGC1A,TP53,mono-(2-ethylhexyl)phthalate
ERBB3	-0.057	kinase		0.476	0.474	7.5e-08	Actn3,BAX,BGN,CCN2,CCND1,CD47,CMA1,CTSK,FBN1,FGF2,FSTL1,HEXB,HMOX1,IGFBP5,MATN2,PHGDH,PTGS1,SERPINA3,SGK1,SLPI,SNAI1,TGM2,TNC,TNNT3,TNXB,Tpsab1,TSPAN3
PTH		other		-0.562	-0.584	8.16e-08	ADAMTS1,AQP2,BCL2,CCN2,CCND1,CEBPB,COL1A2,COL2A1,EGR2,GALNT3,IBSP,IGFBP3,IGFBP5,IL33,KL,LEF1,LIMA1,MGP,MMP2,PALM,PLXDC2,POSTN,PPP1R1B,RUNX1,RUNX2,SDC4,SFRP4,SLC2A4,SPP1,TGFB1,THBS4,TNFRSF11B,VDR,WIF1
RUNX3	0.104	transcription regulator		0.499	0.523	9.11e-08	ASPH,BAX,CCN2,CCND1,CDH11,CHST3,COL12A1,COL4A4,CRIM1,EXT1,FBN1,FGF2,FGF9,FSTL1,LIFR,MMP2,REEP1,RUNX1,SLIT2,SPP1,SSX2IP,STC2,SVEP1,TGFB1,TIMP2,TLCD4,TPSAB1/TPSB2,UGCG
TWIST1	0.162	transcription regulator		0.374	0.36	9.13e-08	ADAMTS1,AR,BAX,BCL2,CCK,CD44,CDH2,CHAD,CHI3L1,COL2A1,DKK3,EGFL6,EMILIN1,FIBIN,HOXD10,IGFBP4,IGFBP5,KCNN4,MET,MMP2,MRC2,MXRA8,NCAM1,PAM,PAMR1,PRKD1,RUNX2,SLC29A1,SNAI1,SPP1,TGFB1,TGFBR2,TP53
CLPP	0.123	peptidase	Activated	4.472	4.502	9.94e-08	ACADVL,ALAS1,ALDOA,ATP5F1A,CS,CYC1,DLAT,DLD,DLST,ETFDH,GAPDH,IDH3A,IDH3B,IDH3G,PDHA1,SLC25A4,SOD2,SUCLA2,SUCLG1,UQCRC1
SMTNL1	0.545	other	Activated	2.887	2.898	1.17e-07	Calm1 (includes others),GAPDH,HK2,HSP90AB1,MYH4,MYL1,MYOM1,PYGM,TNNC2,TNNI2,TNNT3,Tpm1
EGF	0.003	growth factor		1.481	1.449	1.68e-07	ADA,ALOX12,ANPEP,AR,ARHGEF2,ARTN,BCL2,CCN2,CCND1,CD44,CDH11,CDK5,CEBPB,CISH,CLCN3,COL1A2,CTSD,CXCL14,DIO2,DPP4,DUSP6,EEF1A1,EGR2,FGF2,FGFR1,FSTL1,GADD45A,GFPT1,HMOX1,HSD17B1,ID1,IGFBP3,IGFBP4,IGFBP5,IRS1,KLK3,LCN2,LDHA,LIMK2,MAD1L1,MAPK11,MB,MET,MMP2,NCAM1,PDGFRB,PDPN,PIK3R1,PLAT,PLPP3,PTGS1,ROM1,RUNX1,RUNX2,SERPINA1,SERPINA3,SLC1A2,SLC2A4,SNAI1,SPP1,TFAP2A,TGFB1,TGFBR2,TGIF1,TGM1,TGM2,TIMP1,TNC,…
tretinoin		chemical - endogenous mammalian		1.62	1.593	2.13e-07	ABLIM1,Actn3,ADA,ALAS1,ANPEP,ANXA1,ANXA8/ANXA8L1,APLN,APP,ARG1,ASCL1,ATP6V0A4,B3GALT1,BCL2,BMP6,BMPR1B,BNIP3,Calm1 (includes others),CALML3,CALR,CCK,CCN2,CCND1,CCNG1,CD44,CD47,CDH2,CDK5,CEBPB,CITED2,COL1A2,COL2A1,COL4A3,COL4A5,COL9A2,COX11,CPT1B,CRABP1,CRABP2,CTNNA3,CTNND1,CTSD,CTSK,CYP26A1,CYP26B1,DAB2,DIO2,DKK3,DPP4,DPYSL5,EEF1A1,EEF1D,EIF3C,EIF4EBP2,ENPP2,EPHA1,EYA2,Fcna,FGF2,FGFR1,FRAT2,FUT4,…	AHR,CREBBP,ESR1,FOXM1,NFkB (complex),PI3K (complex),PPARGC1A,RB1,SMAD7,SP1,TAF4,TP53,Tgf beta,YBX1,estrogen receptor,tretinoin
GNA15	-0.04	enzyme				2.26e-07	ARG1,CTH,CYCS,DAB2,ENPP1,FBLN5,FGF7,FXYD5,GADD45A,HMOX1,MAP2,MICOS10-NBL1/NBL1,Mt1,MYH1,NOX4,NPR3,PLAT,PRKAA2,PRSS35,RBP1,SERPINA3,SLC29A1,SOD2,SORBS2,TIMP1,TRIB3,UGDH
guanidinopropionic acid		chemical - endogenous non-mammalian	Inhibited	-3.865	-3.89	2.32e-07	ALAS1,ATP5PO,ATP8A1,ATPAF1,COX4I2,Cox8b,CYC1,CYCS,Esrra,MYH1,NDUFA12,NDUFA5,NDUFB2,NDUFB8,NDUFS4,PRKAA2
tamoxifen		chemical drug		-0.311	-0.314	2.52e-07	ASS1,BAX,BCL2,CAT,CCND1,CDH11,CDH2,COL1A2,CTSD,CUZD1,CYCS,CYP2F1,DEPP1,F13A1,F2R,FADS1,GAPDH,GCK,H19,HSP90AB1,HSP90B1,IDH3A,IGFBP3,IGFBP4,IRS1,KLK3,KRT80,LIF,LTBP2,MET,MMP2,NFATC4,NNMT,OXT,PHGDH,PTGER2,PTPRS,SCUBE2,SERPINA3,SLC1A2,SLC5A3,SNAI1,SOD2,SPP1,TGFBR2,TP53,UCP2,UGCG,VDR
KDM5A	-0.011	transcription regulator	Activated	4.626	4.66	2.65e-07	ACTC1,Actn3,ATP5F1A,CCND1,CHCHD3,COL1A2,COQ7,COX14,DLAT,DLST,FXYD1,HMOX1,IDH3B,MRPS23,MYH4,MYL1,NDUFA5,NDUFA9,NDUFB8,NDUFS4,OPA1,PGAM2,REEP1,SOD2,TNNC2,TNNI2,Tpm1,TRIM72,UQCRC1,UQCRFS1
methylprednisolone		chemical drug		-0.145	-0.156	2.86e-07	ABCB4,ABCC9,AK4,ALAS1,ANPEP,ANXA1,ARG1,ASS1,Calm1 (includes others),CCN2,CCND1,CCNG1,Cd24a,CD44,CDH2,CITED2,CST3,CTSV,CYC1,CYCS,DAB2,DDIT4,DSC2,DUSP6,EDNRB,ENPP2,FBLN5,FBP2,FCGR2A,FGF7,FGL2,FSTL1,GADD45A,GCK,GCLC,GRHPR,HMOX1,HSP90B1,ID1,ID3,KCNAB2,Ly6a (includes others),LYVE1,MAFB,MAPK14,MAX,MGP,MMP11,Mt1,NFIA,NPM1,NUDT3,PGAM1,PLAAT3,PLAT,PSAT1,RAB38,SCEL,SDC4,SERPINA1,SERPINA3,SERPINB7,SGK1,SLC1…
Sos		group				3.21e-07	APLN,CADM1,CAT,CCNG1,CD44,CERS4,CHI3L1,COL16A1,CRABP2,CTNND1,DDX3X,ELOVL3,ESM1,FLRT2,GAS2,GM2A,HMOX1,IGFBP5,IRS2,KCNN4,LTBP3,MET,MLH1,Mt2,NAA80,NPTX1,PDPN,PHLDA1,PMEPA1,RBP1,RGMA,RUNX1,SEMA4D,SLPI,SLURP1,TGFB1,TNMD,Tpm1,UGCG
SB-431542		chemical reagent	Inhibited	-2.043	-2.033	3.65e-07	ASPN,BGN,BMP6,CCN2,CCND1,CD44,FAP,GAL,IBSP,ID1,ID3,ITGA11,Kcnn2,MAFB,MMP2,MYLPF,POSTN,PTX3,RUNX2,S1PR3,SLC1A2,SPP1,SPSB1,TFRC,TGFB1,TGIF1	NFkB (complex),P38 MAPK,RUNX2,SB-431542,SP1,TP53,estrogen receptor
lipopolysaccharide		chemical drug	Activated	2.716	2.676	4.33e-07	ABCB4,ACE,ACTC1,ACVR1,ADA,AGTR2,AK4,ALB,ALOX12,ANXA1,APP,AQP4,AQP5,AR,ARG1,ASS1,BAX,BCL2,BGN,Calm1 (includes others),CALR,CASR,CCN2,CCND1,CD163,Cd24a,CD276,CD28,CD44,CDH11,CDH2,CEBPB,CHI3L1,CHST3,CISH,CITED2,COL12A1,COL1A2,COL9A1,COX7A1,CPT1B,CREB3L2,CREB3L3,CRTAP,CRYBA4,CST3,CTH,CTSK,CTSV,CXCL14,CYCS,DDIT4,DDX3X,DIO2,DKK3,EDEM3,EEF2,EGR2,ELL2,ENPP2,Esrra,F2R,FABP3,FBN1,FGF2,FGL2,Foxp1,FSTL1,FZD1…	AHR,CREBBP,ESR1,IL1A,NFkB (complex),PPARGC1A,RB1,RUNX2,SMAD7,SP1,TAF4,TGFB1,TP53,Tgf beta,estrogen receptor,lipopolysaccharide
PTEN	-0.087	phosphatase		-1.847	-1.847	4.79e-07	ANXA1,AR,ARG1,ASPH,ATP5F1A,BACE2,BAX,BCL2,BPGM,CAMK2B,CCND1,CD44,CDH2,CEBPB,CITED2,CNNM4,CS,CST6,CTDSPL,CTSV,CTSZ,CYSLTR1,DEGS1,DHRS11,DLAT,DLD,EGR2,Esrra,FGF1,FGF7,FGF9,FGFR1,GAPDH,GATA3,GCAT,GJA5,GPR176,GPR27,GPRC5C,GRN,HEXB,IDH3A,IDH3B,IDH3G,IGFBP3,IGFBP5,INMT,IRS2,LAMP2,LZTR1,MAN1C1,MAPK14,MET,MMP14,MMP2,NCAM1,NDUFS3,PDGFRB,PDHA1,PF4,PFKL,PGK1,PGM1,PHGDH,PIK3R1,PRKAA2,PRXL2B,PTGS1,PTP4A2,PTPR…	Akt,CREBBP,ESR1,FOXM1,MYOD1,NFkB (complex),NR4A3,PPARGC1A,PTEN,RB1,RUNX2,SP1,TAF4,TP53,YBX1,estrogen receptor
diethylstilbestrol		chemical drug	Activated	2.03	2.012	4.89e-07	ADGRD1,ADM2,AGTR2,AMHR2,AQP4,AR,CCN2,CCND1,CITED2,CLSTN2,COMP,CPXM1,CRABP2,CTSK,CXCL14,CYP2F1,DCLK1,DUSP6,Esrra,FRZB,GADD45A,GAL,GREM1,HSP90AB1,HSP90B1,IGFBP3,IRS1,KLK3,LTBP2,LUM,MAFB,MFAP2,MFAP4,MGP,MMP2,MOXD1,OSBP2,OXT,PAMR1,PDGFRB,PTK7,RIN2,RPN2,RUNX1,S100A8,SLPI,TGFB1,Tgtp1/Tgtp2,TP63,VDR,VIT	MAPK8,NFkB (complex),PIK3R1,TP53,diethylstilbestrol
TP73		transcription regulator		-0.768	-0.782	5.26e-07	ADA,ADAM23,AQP2,AQP5,BAX,BCL2,CADM1,CCNG1,CITED1,CNTFR,CTH,CTSD,DDIT4,FGF2,FXR1,GADD45A,GLS2,GPR176,GRN,HTATIP2,IGFBP3,IGFBP4,IGFBP5,KCNK1,KLHL21,LDHA,LTBP1,LY6D,MAPK14,MCM6,MDK,MICOS10-NBL1/NBL1,MLH1,MMP14,MMP2,NCAM1,P2RY2,PDGFRB,PDPN,PIEZO2,PROCR,PTP4A3,PTPN3,RAB7B,RUNX1,SCRG1,SERPINA1,SERPINA3,SERPINB6,SERPINE2,SERPINF1,SNAI1,Spink2,SPP1,TGFB1,TIMP1,TNFAIP2,TP53,VAMP4,VDR,WARS2
MLXIPL	-0.121	transcription regulator	Activated	4.491	4.459	6.17e-07	GCK,RPL12,RPL17,RPL19,RPL27A,Rpl29 (includes others),RPL35,RPL4,RPL41,RPL9,RPLP2,RPS10,RPS12,RPS15,RPS19,RPS26,RPS27A,Rps3a1,RPS4Y1,RPS5,RPS6,RPS8,RPS9,RPSA
TEAD4	0.25	transcription regulator		-0.29	-0.306	6.17e-07	BBOX1,CCK,CCN2,CCND1,CKM,Cox8b,FGFR1,FIBIN,FILIP1L,FJX1,GATA3,IGFBP5,LOXL1,MB,MYH1,MYH4,NOTCH2,PDGFRL,POSTN,SDC2,SLC2A4,SNAI1,TLE1,TP63
PRKAG3	-1.885	other				6.2e-07	ACVR1,ALAS1,AMD1,ANXA8/ANXA8L1,ASPH,ATP6V1A,Cbr2,CLCN3,DLAT,ELL2,FBXO6,FBXO9,FGFR1,FXYD6,GADD45G,HIVEP2,ID1,IGFBP5,IRX3,JPH1,MAGIX,MAP2K6,NAMPT,PAM,RNF128,RPL12,Rps3a1,SLC40A1,SMS,STK11IP,TFRC,TMEM37,TPPP3,TSPAN8
Alpha catenin		group		-1.483	-1.45	9.24e-07	ADAM33,ADAMTS1,BGN,C1QTNF3,CDH11,COL1A2,CTSV,EGFL6,EPHA3,FSTL1,IGFBP4,KLK3,LEF1,LUM,MMP11,MMP2,PTX3,RHOJ,S100A8,SGK1,SNAI1,TGM2,TIMP1,TNC,TNFAIP2,TSPAN8,VCAM1
PGR		ligand-dependent nuclear receptor		1.108	1.08	9.26e-07	ADAMTS1,AK4,AMD1,AR,CCND1,CD44,CEBPB,CPT1B,CREB3L2,CTDSPL,CTSD,EFNA3,ELL2,ENC1,EPHA1,GAL,GATA3,H19,HSD17B1,ID1,IGFBP5,IRS1,IRS2,KCNG1,KCNK1,KLF11,LDLRAD4,MFAP5,MVP,NEDD9,NOTCH2,P2RY2,PAPSS2,PFKP,POSTN,PPIF,RUNX1,S100A8,SERPINA1,SGK1,SLC9A1,SNAPC1,TNC,TSC22D3,UGCG,VDR
SMYD1	-0.289	transcription regulator				9.83e-07	ATP5F1A,CYC1,CYCS,HK2,IDH3A,IDH3B,IDH3G,NAMPT,NDUFA5,NDUFA9,NDUFAB1,PYGM,TPI1,UQCRC1,UQCRC2,UQCRFS1
Immunoglobulin		complex		-0.052	-0.054	1.16e-06	ALDOA,ANPEP,APLN,APP,ATP5F1A,ATP5MC3,ATP5PF,BCL2,BPGM,CALR,CD164,CD28,CD44,CDH2,CISH,CMA1,COX11,COX4I2,CRISPLD2,CTH,CTSA,CTSZ,CYSLTR1,DDIT4,DLAT,DLD,DLST,DUSP6,EDNRB,EGR2,ENO3,ESM1,EXT1,FAP,FBP2,FCGR2A,GATA3,GCK,HK2,HMOX1,IDH3A,IGFBP4,IL33,IRAK1,KCTD12,LCN2,LTBP3,Ly6a (includes others),MAF,MMP2,MOXD1,NAMPT,NDUFS1,PDHA1,PDPR,PFKL,PGAM2,PGK1,PGM1,PHKB,PHKG1,POSTN,PRDX5,PTGER2,PYGM,RAB31,RNF128,RPS6…
ESRRG	-0.672	ligand-dependent nuclear receptor		-0.804	-0.812	1.19e-06	ATP5MC3,CS,CYCS,DLAT,DLD,DLST,Esrra,FGF1,GAPDH,HK2,IBSP,IDH3A,KCNH2,KLK3,LDHA,MB,PDHA1,SUCLG1,TPI1
IRS1	-0.428	enzyme		-1.993	-2.001	1.2e-06	ACTC1,ATP5F1A,BMP6,CCND1,CEBPB,COX7A1,CRABP2,Esrra,GAS2,GATA3,GCK,GLRB,HMOX1,IGFBP4,IRS1,IRS2,MMP14,MYL1,MYLPF,PIK3R1,PLPP3,SLC2A4,SNAI1,SPP1,TNNT3,TNXB,TRIB3,UCP2	AHR,Akt,ESR1,ESRRA,IRS1,NFkB (complex),P38 MAPK,PI3K (complex),PPARA,PPARGC1A,RUNX2,SP1,TP53,estrogen receptor
PPP3CA	-0.07	phosphatase		0.203	0.19	1.26e-06	ALOX12,APP,BCL2,CDH2,CTSV,FXYD1,GRN,LAMP2,LITAF,LPAR1,MYH1,PDPN,PLPP3,PRDX5,PTGFR,RUNX2,SDC4,SLC2A4,SNAI1,SPP1
3,5-diiodothyronine		chemical - endogenous mammalian	Inhibited	-2.63	-2.643	1.28e-06	AK1,CKM,ENO3,GAPDH,IDH3A,PGM1,SLC2A4
SMAD3	0	transcription regulator		0.742	0.723	1.47e-06	ALB,ASPN,BCL2,BGN,BMP6,CCN2,CCND1,CDH11,CDH2,CKM,COL1A2,COL2A1,CPT1B,CRISPLD2,FNDC5,GATA3,HMOX1,HSP90B1,IBSP,ID1,ID3,KLK3,LPAR1,LUM,Ly6a (includes others),MAX,PMEPA1,PTP4A3,PTX3,RPS6,RPS8,RUNX2,S1PR3,SLC25A4,SNAI1,SPON1,SPP1,TGFB1,THBS4,TIMP1,TNC,Tpsab1,TPSAB1/TPSB2
nitric oxide		chemical - endogenous mammalian		0.911	0.899	1.55e-06	ACE,APP,AR,BAX,BCL2,BNIP3,CCN2,CCND1,CCNG1,CD44,DUSP6,FGF7,GADD45A,GCLC,HMOX1,HSP90AB1,HSPG2,MMP2,Mt1,Mt2,NCAM1,PDIA4,PRDX5,PTGS1,RXRG,SGK1,SPP1,TFRC,TIMP2,TP53
MRTFB	-0.204	transcription regulator	Activated	2.058	2.045	1.57e-06	ADAMTS1,BBOX1,CCN2,CMA1,CNN2,COL25A1,CRIM1,DAB2,DDAH1,EYA2,F2R,FIBIN,FILIP1L,FJX1,GADD45A,GAS2,ID1,IGFBP5,LCN2,LOXL1,MAP2,NREP,PDGFRL,POSTN,RUNX1,S100A8,SDC2,SGK1,SLC20A1,SLPI,SYNPO2,TLE1,WTIP
HIF1A	-0.293	transcription regulator		-0.717	-0.748	1.67e-06	ADAMTS1,ALDOA,APLN,AQP4,ATP5PF,BAX,BCL2,BGN,BNIP3,CA9,CCN2,CCND1,CD164,CD44,CDH2,CITED2,COX4I2,CTSD,DDIT4,EDNRB,FAM162A,GAPDH,GCK,HK2,HMOX1,ID1,IGFBP3,IGFBP5,IRS2,LDHA,LIFR,MB,MET,MMP2,NOX4,NPM1,PDHA1,PFKL,PGK1,RET,SDC4,SLC16A3,SLC29A1,SLC2A4,SLC39A7,SLC40A1,SNAI1,SOD2,SPOP,STC2,TAC1,TFRC,TGFB1,TIMP1,TNFAIP2,TNFRSF11B,TP53,TPI1,TRIM66,VCAM1
STK11	-0.109	kinase	Inhibited	-2.27	-2.282	1.7e-06	ACE,ACVR1,ADSL,ALB,ALDOA,ASS1,ATP5MC3,Cabp1,CCND1,Cox5b,CS,CTSD,CYC1,ECM2,FBXO9,Foxp2,GADD45A,GAPDH,ID1,IGFBP5,IL33,LDHA,LUM,MMP2,NDUFA8,NDUFA9,NDUFB9,NDUFC2,NEDD9,NPTX2,PDGFRL,PGK1,PGM1,PHGDH,POLD4,POLR3D,PSAT1,PTPN3,RAB10,RASGRP1,RPS6,SNAI1,SPP1,STK17B,TPI1,TTYH1,UQCRC1
Esrra	-0.428	transcription regulator		-1.576	-1.584	1.78e-06	ACAT1,ALDOA,ATP5MC3,ATP5PB,ATP5PF,ATP5PO,BPGM,Cox5b,CYC1,CYCS,DLAT,ENO3,IBSP,IDH3A,LEPR,NDUFA5,NDUFS3,PFKL,PGAM2,PGM1,PHKG1,PPP1R1B,PYGM,SPP1
COLQ	-0.078	other		1.769	1.767	2.02e-06	ASPN,BGN,COL2A1,DOK7,EXT1,FBLN5,FGF7,GPC4,HSPG2,LRP4,LTBP1,LTBP3,MFAP2,MMP16,MMP2,SDC4,SNTA1,TGFB1,TIMP1
CG		complex		0.756	0.724	2.19e-06	ACPP,ADAMTS1,ADH7,APLN,AR,BAX,BCL2,CDH2,CEBPB,CTSV,CYP26A1,DUSP6,ENPP2,EPHA3,EPHA7,ESM1,FGF9,FGL2,FJX1,FZD1,GAL,GBP6,GM2A,HK2,IGFBP3,IGFBP4,IL33,IRS2,LEPR,LIF,MAF,MMP2,NPR3,NUCB2,OXT,PHLDA1,PLAT,PLPP3,PPP1R14A,PTGER2,PTGFR,PTGS1,PTX3,RUNX1,RUNX2,SDC4,SFRP4,SLC20A1,SPP1,TAC1,TENM4,TIMP1,TP53,TRO
decitabine		chemical drug	Activated	2.077	2.057	2.28e-06	ADAM23,ADAMTS1,AR,BAX,BCL2L2,BNIP3,CA9,CAB39L,CADM1,CCN2,CCND1,CD44,CDH11,CDH2,CHI3L1,CNMD,COL1A2,CRABP2,CYP26A1,DDX3X,DNAJC15,DSG2,EEF1A1,EEF1B2,EFNA3,EGFL6,EHMT2,ELOVL4,EPHA3,EPHB3,FGF2,FGFR1,FILIP1L,FLRT3,GADD45G,GCK,GLB1,GLRB,GRIN2A,H19,HK2,ID1,IGFBP3,IRAK1,LEF1,LEPR,LTBP1,LUM,MAF,MAFB,MAP2,MET,MLH1,MMP14,MMP2,MOB2,NCAM1,NPTX1,NPTX2,OLFM1,PABPC1,PITPNA,PLCE1,PLXNA3,PSAT1,RCC2,RET,ROBO1,RPL4,R…	Akt,CDH1,CREBBP,ESR1,FOXM1,NFkB (complex),PPARGC1A,RB1,RUNX2,SP1,TAF4,TP53,YBX1,decitabine,estrogen receptor
deferoxamine		chemical drug		-0.96	-0.978	2.32e-06	ALDOA,ANGPT4,APLN,APP,BCL2,BNIP3,CA9,CCND1,CD47,CITED2,F13A1,FGF18,GADD45A,GEM,HK2,HMOX1,IGFBP3,IGFBP4,IGFBP5,LCN2,LDHA,MAPK14,MFN1,MMP2,NFATC4,OPA1,PGK1,PLAT,SERPINE2,SPP1,TFRC,TGFB1,TP53,VCAM1,VDR
NR4A1	-0.08	ligand-dependent nuclear receptor		0.728	0.738	2.36e-06	ALDOA,ATP5F1A,ATP5MC3,ATP5PF,BCL2,BPGM,CCND1,COL16A1,COL1A2,COX11,COX4I2,CRABP2,CTNND1,DLAT,DLD,DLST,ENO3,FBP2,GCK,GREM1,HK2,HMOX1,IDH3A,Ly6a (includes others),Mt1,NDUFS1,NUCB2,PDHA1,PDIA3,PDPR,PFKL,PGAM2,PGK1,PGM1,PHKA1,PHKB,PHKG1,PPP1R3C,PRKAG3,PYGM,SLC2A4,SOAT1,SUCLA2,SUCLG1,UCP2,UQCRFS1,VCAM1
HBA1/HBA2	-0.357	transporter	Inhibited	-3.207	-3.226	3.04e-06	ATP5PO,CYC1,Mt1,NDUFA5,NDUFA9,NDUFB8,NDUFB9,NDUFS3,NDUFS4,NDUFV2,RET,UCP2,UQCRC1,UQCRC2
COL6A1	0.094	other	Inhibited	-2.75	-2.754	3.15e-06	AK1,ALDOA,CKM,ENO3,PVALB,TNC,TNNI2,TPI1
HRAS	-0.094	enzyme		0.791	0.779	3.37e-06	ADRA2C,ANTXR1,ANXA8/ANXA8L1,APP,ASCL1,ATP5PF,BAX,BCL2,BNIP3,Cbr2,CCN2,CCND1,CCNG1,CD44,CEBPB,CISH,CNN2,COL1A2,COL2A1,CRABP2,CRIM1,CTSV,CTSZ,DIXDC1,DPP4,DUSP6,EIF3C,ENPP1,ERP29,F2R,FABP3,FAT1,FGF2,FLRT2,FSTL1,FZD1,GADD45G,GRN,GUSB,HMOX1,HTRA1,IGFBP4,IGFBP5,IL17RD,IQGAP2,IRX3,KCNC1,LIPG,LOXL1,MET,MMP14,MMP2,NPM1,OAF,OSBP2,PDGFRB,PMEPA1,POSTN,PRR5,PTGS1,PTPRS,PWWP3B,RASGRP1,RPL27A,RPS10,RPS6,SASH1,S…
nitroarginine		chemical reagent		0.754	0.744	3.45e-06	ALB,ALOX12,CD44,CKM,GCLC,HMOX1,NCAM1,PLAT,SLC2A4,SPP1,TGFB1
APOE	0.289	transporter		-0.917	-0.898	3.67e-06	ACAT1,ALOX12,ANXA11,APP,BAX,BGN,CALR,CAT,CCN2,CCND1,CD44,CTSD,CTSK,CTSV,EMILIN1,F2R,GATA3,HMOX1,HSP90AB1,HSP90B1,HSPG2,JAK1,LCN2,LIPG,LRP1,LTBP1,LTBP2,MAP2,MAPK14,MGP,MMP2,MTCH1,NELL2,NOX4,PHLDA1,PLPP3,PMEPA1,PPFIBP2,PTP4A3,PTX3,S100A8,SDC4,SERPINA3,SOD2,SPP1,TGFB1,TIMP1,UCP2,VCAM1
forskolin		chemical toxicant		0.796	0.768	3.72e-06	ACE,ACPP,ADAMTS1,ADCY9,ADSL,ALDOA,APP,AQP2,AQP5,ATP6AP2,ATP6V1A,BCL2,CALR,CCK,CCN2,CCND1,CD163,CD44,CDH2,CDK14,CEBPB,CITED4,COL1A2,CRISPLD2,CTNND1,CTSV,CYFIP2,DAB2,DDIT4,DIO2,DUSP6,ELL2,ESM1,Esrra,FBLN5,GADD45A,GADD45G,GAL,GEM,GPRC5C,GRN,H19,HK2,HMOX1,HSD17B1,IBSP,ID1,ID3,IGFBP3,IGFBP5,IRS2,KLK3,LITAF,MET,MFN1,Mt1,Mt2,NAMPT,NPTX2,OPA1,PDE4A,PEG10,PGK1,PLAT,PPP1R3C,PRKD1,PTGS1,RAB31,RET,RPS10,RUNX…
NR3C2	-0.264	ligand-dependent nuclear receptor		0.239	0.23	3.89e-06	ABCC9,ADAMTS1,AQP4,ARG1,BAX,BCL2,CAT,CCN2,CYFIP2,DDIT4,FGF2,Hrc,IDH3B,LCN2,MAP2,MLF1,NFIA,NOX4,PLAT,PROCR,PTX3,SERPINA3,SGK1,TGFB1,TNNT3,TP53,TSC22D3
FOXO1	-0.156	transcription regulator		1.23	1.208	4.07e-06	ALAS1,ALB,APLN,AR,ATP5MC3,ATP5PF,BAX,BCL2,BCL2L2,BNIP3,CAT,CCN2,CCND1,CERS4,CITED2,COL2A1,COMP,CPT1B,CS,CTSK,CTSV,CYCS,DDIT4,DIO2,EDNRB,EFHD1,EGR2,ERG,FGF18,FOXP4,GADD45A,GCK,GPD2,GRHPR,GRN,HMOX1,HSP90AB1,IKZF5,IRS1,IRS2,KLK3,LAMP2,MB,MFN1,NAMPT,NDUFA12,NDUFA8,NDUFA9,NDUFAF1,NRP2,PIK3IP1,PRKAA2,PTGS1,RHOT2,RIPOR2,RUNX2,S1PR3,SGK1,SLC25A19,SLC2A4,SOD2,TGFB1,TP53,TRIB3,VCAM1
EWSR1-FLI1		fusion gene/product		-1.567	-1.548	4.24e-06	BBOX1,CCN2,CCND1,COL25A1,FIBIN,FILIP1L,FJX1,GAS2,ID1,IGFBP5,LOXL1,MAP2,NREP,PDGFRL,POSTN,SDC2,SYNPO2,TGFBR2,TLE1
NSUN6	0.291	enzyme		-0.277	-0.302	4.42e-06	CCN2,COL4A3,CRIM1,DAB2,DDAH1,FGF2,FSTL1,HEXB,PHGDH,SCHIP1,SGK1,TGM2,TSPAN3
PD98059		chemical - kinase inhibitor		-0.549	-0.514	4.92e-06	ACE,ACOT7,ALDOA,AMD1,ANPEP,ANXA1,AR,ARRB1,ATP2A1,BAX,BCL2,BGN,BNIP3,CCK,CCN2,CCND1,CD44,CDH2,CEBPB,CMA1,COL1A2,CTSK,CYCS,DCBLD2,DIO2,DUSP6,EDNRB,EEF1A1,EGR2,F2R,FGF2,GADD45A,GFPT1,GRN,HMOX1,ID3,IGFBP3,LAMP2,LDHA,LIFR,LIPG,MB,MCF2L,MET,MMP11,MMP14,MMP2,MYH1,MYH4,PABPC1,PHLDA1,PIK3R1,PLAT,POSTN,RPS6,RUNX1,RUNX2,S100A8,SERPINA1,SERPINB7,SLC3A2,SNAI1,SOAT1,SPP1,TGFB1,TIMP1,TIMP2,TP53,Trim30a/Trim30d,…
FGF2	-0.404	growth factor		0.085	0.061	5.15e-06	ACE,AGTR2,ALB,ANPEP,AR,ASCL1,BAX,BCL2,BGN,CAPZA2,CCK,CCND1,CDH11,CNMD,COL1A2,CTSK,DUSP6,EDNRB,ENPP1,ENPP2,FBN1,FGF2,FGFR1,GADD45A,GREM1,GRIK4,GRIK5,GRIN2A,HK2,IBSP,ID3,IGFBP3,IGFBP4,IGFBP5,IRS1,KCNC1,KL,LEF1,LYVE1,MET,MGP,MMP2,PDGFRB,PGK1,PLAT,RET,RUNX1,RUNX2,S100A8,SDC2,SLC20A1,SNAI1,SPP1,TAC1,TGFB1,TIMP1,TP53,VCAM1
TEAD2	-0.098	transcription regulator		1.155	1.133	5.38e-06	BBOX1,CCN2,CCND1,FIBIN,FILIP1L,FJX1,IGFBP5,LOXL1,MCM6,PDGFRL,POSTN,SDC2,TLE1,TP53,TP63
COL4A3	-1.677	other				6.79e-06	CCN2,COL1A2,COL4A4,COL4A5,MAPK14,MMP14,MMP2,TGFB1,TIMP1,TIMP2
RUNX2	0.832	transcription regulator	Activated	2.022	2.007	6.81e-06	BAX,BCL2,CCND1,CDH2,COL1A2,FGF18,FLRT2,GALNT3,HTRA1,IBSP,ITGBL1,LEF1,LUM,MMP14,MMP2,RUNX1,RUNX2,SNAI1,SOX6,SPP1,TIMP1,TNFRSF11B,TPSAB1/TPSB2,UGCG	Akt,NFkB (complex),PPARGC1A,RUNX2,SP1,TP53,estrogen receptor
nitrofurantoin		chemical drug		1.187	1.183	7.33e-06	ACADVL,ADAMTS1,ALB,AMD1,ASS1,BAX,CAT,CCND1,CCNG1,COL2A1,CST3,CTSV,EEF1A1,FGF7,GADD45A,HMOX1,ID1,IGFBP3,MET,MMP14,Mt1,PLAT,RPS8,RPS9,SERPINA1,SPP1,TIMP1,TP53,TUBA1A,VCAM1
INHA	-0.525	growth factor		0.217	0.217	7.64e-06	ADAMTS1,ADAMTSL2,BAX,BCAN,BCL2,CCN2,COCH,COL1A2,COL4A4,COL4A5,COMP,CYP26B1,FGFR1,IGFBP4,KIF24,LTBP1,MATN2,MMP2,PIK3IP1,PIK3R1,PTX3,SFRP4,SGK1
MYOD1	-0.568	transcription regulator	Inhibited	-2.778	-2.795	9.28e-06	ACTC1,ADCY7,ALDOA,ASS1,ATP2A1,BCL2,CKM,CXCL14,ENO3,ENPP2,FNDC5,FSTL1,GADD45A,GADD45G,HJURP,Hrc,IGFBP5,LIF,MAFB,MMP2,MSC,MYH4,MYL1,MYLPF,NPTX1,PMEPA1,POSTN,RUNX1,SCHIP1,SCN4A,SDC2,SGCA,SLC12A2,SLC2A4,TGFB1,TNNC2,TNNI2,TNNT3,ZBTB18	MEF2C,MYOD1,NFkB (complex),NR4A3,P38 MAPK,RB1,RUNX2,SP1,TP53,estrogen receptor
PPARG	0.204	ligand-dependent nuclear receptor		-0.491	-0.505	9.77e-06	ALOX12,APP,ARG1,ATP5PO,BAX,BCL2,CAT,CCN2,CCND1,CEBPB,COL1A2,CPT1B,CRABP2,CS,CXCL14,CYCS,CYP26A1,DLAT,ELOVL3,FABP3,FBP2,FGF1,FZD1,GABARAPL2,GAPDH,GCK,Gm12854/S100a11,HIVEP2,HK2,HMOX1,IGFBP3,IGFBP5,IL33,IRS1,IRS2,KLF11,LNPEP,LY6D,MANBA,MAP2,MBNL1,MMP14,NDUFA5,NOX4,PF4,PHKB,PLIN5,RBP4,RGL1,RPSA,RUNX2,S100A8,SERPINA1,SGK1,SLC27A3,SLC2A4,SLC9A1,SPP1,TGFBR2,TP53,TRIB3,TSC22D3,UCP2,VCAM1,VDR
halofuginone		chemical drug		-1.97	-1.958	1.03e-05	BGN,CCN2,Cd24a,CD44,COL1A2,DKK3,EDNRB,F2R,FBLN5,FBN1,FSTL1,FXYD6,H19,HSD17B1,IGFBP3,LTBP1,MMP2,PIK3R2,PLPP3,PTPRS,SCPEP1,SPP1,TGFB1,TGFBR2,TGM2,TIMP1,TIMP2	AHR,NFkB (complex),P38 MAPK,PPARGC1A,RUNX2,SP1,TP53,estrogen receptor,halofuginone
SB203580		chemical - kinase inhibitor	Inhibited	-2.396	-2.356	1.07e-05	ADAMTS8,ANXA1,AQP4,ARG1,BAX,BCL2,BPGM,CCK,CCN2,CCND1,CD109,Cd24a,CD28,CD47,CDH2,CEBPB,COL1A2,CTSK,CYP26B1,EDNRB,ERP29,FABP3,GADD45A,HK2,HMOX1,IGFBP3,LIFR,MAP2K6,MAPK14,MMP2,MYLPF,NAMPT,NKD2,PATJ,PDGFRB,PLAT,POSTN,RUNX1,RUNX2,SGK1,SLC20A1,SLPI,SNAI1,SOD2,SPP1,STC2,STK17B,TGFB1,TGM1,TGM2,TIMP1,TIMP2,TNFRSF11B,TP53,TP63,UCP2,VCAM1,VDR,WLS	AHR,CREBBP,ERK,ESR1,IKBKB,NFkB (complex),P38 MAPK,PPARGC1A,RB1,RUNX2,SB203580,SP1,TAF4,TP53,estrogen receptor
Ins1		other		1.086	1.068	1.11e-05	AGTR2,ALAS1,ALB,APLN,BPGM,CA14,CCK,CCND1,CEBPB,CKM,Cox8b,EGR2,ERP29,FABP3,FADS1,FBP2,FGF2,GAPDH,GATA3,GCK,HK2,IGFBP3,IGFBP4,IGFBP5,IRS1,IRS2,LDHA,LIFR,LRP1,Marcks,MMP2,Mt1,NDUFB9,NDUFS4,OXT,PIK3R1,PIK3R2,PLAT,RUNX2,SLC2A4,SLC37A4,SOD2,TIMP1,TIMP2,UQCRC1,UQCRC2
PPP1CA	-0.086	phosphatase		1.276	1.264	1.13e-05	AR,CCN2,CDH2,RUNX2,SPP1,WWTR1
CREB1	-0.044	transcription regulator		0.353	0.336	1.17e-05	AK4,ALAS1,ARG1,ARHGAP33,ATF5,BCAP29,BCL2,BNIP3,Cabp1,CACNA2D1,CCK,CCND1,CDH11,CDH2,CDK14,CEBPB,COCH,CRIM1,CYFIP2,DIO2,EDIL3,EGR2,FGL2,GAA,GADD45A,GADD45G,GAL,GEM,HMOX1,ID1,IRS2,ITGBL1,KCNC4,LCN2,LITAF,LMO1,LYPD6,MCM6,MDGA1,NARF,NECTIN3,NPTX2,NREP,NRP2,OXNAD1,OXT,PAM,PEG10,PLAT,PLXDC2,Ptprd,RBP4,RELT,RIPOR2,ROBO1,RUNX1T1,S1PR3,SFRP4,SGK1,SLC19A1,SLC2A4,SMS,SOD2,SPHKAP,SPOCK3,TAC1,TFAP2A,TFRC,TGIF1…
MEF2C	-0.176	transcription regulator		-1.798	-1.82	1.2e-05	ACTC1,ATP2A1,CALR,CCBE1,CKM,CLSTN2,COL1A2,COL2A1,CPT1B,ECM2,EGR2,FAP,FRZB,GJA5,IBSP,MMP27,MYH1,MYLPF,MYOM1,MYOZ1,PHKA1,POSTN,PTGS1,RUNX2,SLC2A4,TNNI2
TCF		group				1.23e-05	BCL2,CCND1,CD44,CNN2,CRYBG1,DIO2,EPHB3,F13A1,FGF18,FGF9,HTRA1,ID3,IRS1,KLK3,LEF1,MMP2,SERPINA1,SERPINA3,TSPAN8,UGCG
5-fluorouracil		chemical drug		1.378	1.388	1.24e-05	ACVR1B,ALDOA,ASB11,ATP5PB,ATP5PO,BAX,BCL2,BNIP3,CCND1,CCNG1,COL1A2,CTSD,CYCS,CYFIP2,EEF2,EIF3C,GADD45A,GAPDH,HMOX1,HSP90AB1,IER5,LDHA,LIF,MAD1L1,MVP,NDUFV2,PGK1,PROCR,RPL19,RPL27A,RPL35,RPS12,RPS27A,RPS4Y1,RPS8,SERPINB6,SMS,SNAI1,TGFB1,TP53,TPI1,TRIB3,UQCRC2,VDR
Hif1		complex	Inhibited	-2.375	-2.395	1.29e-05	ALDOA,APLN,BCL2,BNIP3,CA9,DDIT4,HMOX1,KCNB1,LDHA,NGB,PFKL,PGK1,S100A8,SLC16A3,TFRC
succinic acid		chemical - endogenous mammalian		0.834	0.831	1.3e-05	CA4,CD44,CLEC3B,Cox8b,DIO2,DPP4,ELOVL3,ID1,IGFBP4,MYH1,MYH4
ADAM12	0.333	peptidase	Inhibited	-2.456	-2.447	1.31e-05	AEBP1,C1QTNF3,CCN2,CEBPB,COL4A5,FBLN7,FBN1,GREM1,IGFBP3,IGFBP5,IL33,KERA,LUM,MFAP5,MGP,OGN,PARM1,SERPINE2,SVEP1
IGF1R	0.141	transmembrane receptor		-1.068	-1.089	1.46e-05	ACP1,ALDOA,APP,AQP4,ATP5F1A,ATP5MC3,ATP5PF,ATP5PO,BAX,BCL2,Cabp1,CEBPB,Cox5b,Cox8b,CTNND1,CTSD,CYCS,GCK,H19,HTRA1,IGFBP3,IGFBP4,IGFBP5,IRS1,IRS2,MAPK14,NDUFA9,NDUFB9,NDUFV2,PLAT,RAB1A,RPL9,RPS26,SDC4,SNAI1,TGFB1,TP53,UQCRC1,UQCRC2
genistein		chemical drug		1.766	1.752	1.5e-05	ABCB9,ACE,ACPP,ALAS1,AR,ARG1,ATP5PO,ATP6V0A4,ATP6V1A,BAX,BCL2,CAT,CCN2,CCND1,CD164,CD44,CITED2,CTSA,CTSD,CTSK,CTSV,EXT1,Fcna,FXYD5,GCLC,GFPT1,GLB1,GM2A,GUSB,HEXA,HEXB,HMOX1,ID1,KLK3,MAL2,MANBA,MMP2,Mt1,NAGLU,PIK3R1,PLAT,RASGRP1,RPN2,RUNX2,SCPEP1,SGSH,SOD2,SPP1,STK17B,TGFB1,TNFRSF11B,TP53,VCAM1,VDR	Akt,LDL,NFkB (complex),P38 MAPK,PIK3R1,PPARGC1A,RUNX2,SP1,TFEB,TP53,estrogen receptor,genistein
EIF2S1	-0.136	translation regulator		-0.555	-0.564	1.52e-05	ACPP,ADM2,CA6,CA9,CAT,CCND1,CEBPB,GCLC,HHIPL1,HMOX1,NNMT,PHLDA1,TGM1,TRIB3
TEAD3	0.089	transcription regulator		0.629	0.607	1.52e-05	BBOX1,CCN2,FIBIN,FILIP1L,FJX1,IGFBP5,LOXL1,MYH1,MYH4,PDGFRL,POSTN,SDC2,TLE1,TP63
BRCA1	0.423	transcription regulator		-0.203	-0.212	1.7e-05	AK1,ANXA8/ANXA8L1,AQP5,AR,BAX,BCL2,CAMK2B,CASR,CCND1,CCNG1,Cd24a,CTSD,DDIT4,DUSP3,ENPP2,GADD45A,HMOX1,JAK1,KLK3,Ly6a (includes others),MATN4,MLH1,NEDD9,PHLDA1,ROBO1,SERPINE2,SNAI1,TNFAIP2,TP53,TP63
TEAD1	-0.108	transcription regulator		0.363	0.344	1.77e-05	BBOX1,CCN2,CCND1,CS,FIBIN,FILIP1L,FJX1,IGFBP5,LOXL1,MB,MYH1,MYH4,PDGFRL,POSTN,SDC2,TLE1,TP63
phosphate		chemical - endogenous mammalian		0.622	0.612	2e-05	ACAT1,CYC1,DHRS7,DIO2,DUSP6,EMILIN1,ENPP1,F2R,GALNT3,HK2,JAK1,LDHA,NDUFA12,NPM1,OGN,POSTN,SLC20A1,SPP1,STC2,TGFB1,TIMP1
SMARCA4	0.041	transcription regulator		-0.755	-0.795	2.03e-05	ACE,ALB,ANO1,ATP2A1,BCL2,CA14,CCN2,CCND1,CD44,CD47,CDH11,CEBPB,CHODL,CKM,CLDND1,CRYBG1,CSNK1G2,CYB5R2,CYP26A1,DUSP6,ECM2,ENO3,EPHA1,EPHB2,FCGR2A,FGF9,FUT1,GADD45A,GADD45G,GAPDH,GCAT,GCLC,GSTO1,H1-10,HEXB,HKDC1,Hrc,ID3,IGFBP4,IGFBP5,KLK3,LEF1,LUM,MGP,MMP2,Mt1,MYL1,MYLPF,NRP2,NTNG1,PLAT,PLPP3,PPP1R14C,PTP4A2,PTX3,RAB38,RBP1,RUNX2,SCHIP1,SDC2,SERPINB7,SERPINE2,SLC2A4,SLC40A1,SPP1,TIMP2,TMEM204,TNNC2…
MRTFA	-0.119	transcription regulator	Activated	2.596	2.59	2.11e-05	ACTC1,CCN2,CMA1,CNN2,COL25A1,COX7A1,Cox8b,CYFIP2,DDAH1,ELOVL3,EYA2,F2R,FABP3,FIBIN,GADD45A,GAS2,ID1,LCN2,MAP2,MMP16,NREP,RUNX1,S100A8,SGK1,SLC1A2,SLC20A1,SLPI,SPOCK3,SYNPO2,TNC,WTIP	MRTFA,MRTFB,SRF
EGLN		group	Activated	2.485	2.518	2.12e-05	ADM2,AK4,ANKRD9,APLN,ASCL1,BNIP3,CA9,DDX41,EFNA3,GAPDH,GATA3,GRHPR,H3C1,HK2,LCN2,LDHA,PAM,PDGFRL,PFKL,PFKP,PGAM1,PGK1,PGM1,RRAGD,SLC16A3,STC2,TPI1,WWTR1
peoniflorin		chemical drug		1.807	1.804	2.2e-05	ATP5F1A,DDAH1,HIBADH,HMOX1,PDIA3,PPIF,PPP1R1B,RUNX1,SAR1B
COL9A1	1.135	other		1.352	1.349	2.22e-05	COL12A1,COL2A1,COMP,HSPG2,MATN3,MATN4,THBS4
PPARGC1B	-0.031	transcription regulator	Inhibited	-2.268	-2.287	2.25e-05	ACADVL,ATP5PO,CCND1,Cox5b,COX7A1,Cox8b,CPT1B,CS,CYCS,DIO2,GCK,HK2,NDUFV2,PHOSPHO1,RUNX2,SLC2A4	ESRRA,NFkB (complex),PPARA,PPARGC1A,PPARGC1B,TP53,palmitic acid
aldosterone		chemical - endogenous mammalian		0.671	0.648	2.26e-05	ACE,ADAMTS1,AGTR2,APLN,AQP2,AQP4,ATP6V0A4,CCN2,COL1A2,IRS1,IRS2,KL,LCN2,MMP2,PROCR,PTGS1,RIPOR2,SGK1,SLC12A2,SLC9A1,SPP1,TGFB1,TIMP1,TSC22D3,VCAM1
NME1	0.063	kinase		-0.77	-0.761	2.37e-05	BAX,BCL2,CCN2,CCND1,CTSD,FZD1,LPAR1,MET,MMP14,MMP2,PABPC1,TIMP1,TP53
bleomycin		chemical drug	Activated	3.232	3.199	2.38e-05	ARG1,BAX,BCL2,CAMK2B,CCN2,CDH11,COL1A2,CTSD,CTSK,F2R,FAP,FGFR1,FRZB,FZD1,ID1,IRAK1,JAK1,LTBP1,LTBP2,MMP14,MMP2,PLAT,PTGER2,SDC4,SPP1,STK17B,TGFB1,TGFBR2,THBS4,TIMP1,TIMP2,TP53,TP63	AHR,Collagen type I (complex),IL1A,NFkB (complex),PPARGC1A,RUNX2,SMAD7,SP1,TGFB1,TP53,Tgf beta,bleomycin,estrogen receptor
SMO	-0.033	g-protein coupled receptor				2.44e-05	BCL2,BGN,CCND1,DIXDC1,ENPP1,KLK3,LEF1,LUM,MTMR7,NCAM1,NRP2,OGN,PRSS35,RUNX1,S100A8,SMS,SYNM,VCAM1,WIF1
FOXO3	0.021	transcription regulator		0.701	0.692	2.46e-05	ACVR1,ANXA1,APLN,AQP4,AR,BAX,BCL2,BNIP3,BPGM,CAT,CCN2,CCND1,CERS4,COMP,CTSV,DDIT4,DEPP1,EDNRB,EGR2,ERG,GADD45A,GCLC,HTATIP2,IRS2,JAK1,LCN2,MAX,MBNL1,MET,Mt1,Mt2,NAMPT,NRP2,PIK3IP1,PRDX5,PRKAA2,PTGS1,RUNX2,S1PR3,SGK1,SLC40A1,SLIT2,SNAI1,SOD2,TGFB1,TP53,TP63,UCP2,VCAM1
PRNP	0.123	other		1.726	1.722	2.64e-05	APP,BAX,BCL2,CCND1,CD44,CTSD,DAB2,FGF9,HSP90B1,IRS1,LAMP2,LRP1,MMP11,MMP2,PDIA3,PLPP3,TLE1,TP53	AHR,MAPK8,NFkB (complex),P38 MAPK,PPARGC1A,PRNP,RUNX2,SP1,TP53,estrogen receptor
COMMD1	-0.078	transporter		1.897	1.919	2.68e-05	ALDOA,BNIP3,DDIT4,GRHPR,HK2,LDHA,PFKP,PGK1,STC2,TFRC
DPP4	0.598	peptidase		0.798	0.798	2.68e-05	EGR2,FAP,FGF2,LRP1,MMP14,MMP2,SLC2A4,TGFB1,TIMP1,TIMP2
MYOC	-2.215	other		1.664	1.656	2.98e-05	ADAMTS1,ANXA1,CD44,CDH11,DAB2,DDIT4,DPP7,EGR2,FBN1,GPRASP1,IGFBP5,JDP2,LHX8,MFAP2,RHBDF1,RUNX2,SPP1,STC2,TGIF1
AHR	0.229	ligand-dependent nuclear receptor		-1.592	-1.595	3.1e-05	ALB,APP,ASPN,BAX,CCND1,CDH2,COL12A1,COL13A1,COL14A1,COL16A1,COL1A2,CTSD,DUSP6,EGR2,EMILIN1,FBLN5,FGF9,GADD45A,HK2,ITGBL1,LDHA,LTBP1,LTBP2,LTBP3,MATN2,MMP2,Mt1,Mt2,NEDD9,NNMT,NPTX1,OLFML1,OPA1,PDGFRB,PLAT,RBP1,SLC16A10,SNAI1,SNTA1,SOD2,SPP1,TGFB1,TGFBR2,TIMP2,TNFRSF19,TP53,TUBA8	AHR,Akt,CREBBP,ESR1,FOXM1,NFkB (complex),PI3K (complex),PPARGC1A,RB1,RUNX2,SMAD7,SP1,TAF4,TGFB1,TP53,YBX1,estrogen receptor
IL6		cytokine		0.082	0.053	3.15e-05	ACVR1,ACVRL1,ADAMTS1,ALAS1,ALB,ANPEP,ANXA1,APP,AQP4,ARG1,ATP2A1,BAX,BCL2,BGN,BMP6,CCK,CCN2,CCND1,CD163,CD44,CEBPB,CIB2,CISH,COL2A1,COMP,CST3,CTSK,DUSP6,EGR2,ENPP2,FGF2,GADD45A,GADD45G,GAL,GALE,GREM1,HJV,HMOX1,ID1,IGFBP3,IGFBP4,IGFBP5,IRS1,JAK1,KLK3,LCN2,LIF,LIFR,MAF,MAP2,MET,MFAP4,MMP2,Mt1,Mt2,NAMPT,NUCB2,OSBPL1A,PLAT,PRPH,PTGFR,PTP4A3,RET,RUNX2,SERPINA1,SERPINA3,SGK1,SLC12A2,SLC14A2,SLC2A4,SLC40…
SIRT1	-0.15	transcription regulator		0.024	0.04	3.18e-05	ACD,ANO1,APLN,ARG1,ARNT2,BAX,BCL2,BNIP3,CAT,CCND1,CDH2,CEBPB,CNTN6,CPT1B,CYCS,Esrra,FGF7,FGFR1,FLT3LG,GADD45A,GBP6,GCK,GFPT1,HIVEP3,HJURP,HK2,HMOX1,ID1,Iigp1,KCNA1,LTBP2,MLH1,MMP2,NDUFA5,NECTIN4,NELL2,P3H3,PHKB,PRMT3,PYGM,RBPJL,RUNX2,SFRP4,SLC27A6,SLC29A1,SOD2,Tgtp1/Tgtp2,TIMP2,TP53,Trim30a/Trim30d,UCP2,UQCRC2,UQCRFS1,Wasl
FSH		complex		-0.685	-0.697	3.43e-05	ACPP,ADAMTS1,ADCY7,ADCY9,APLN,AR,BCL2L2,BMPR1B,CCN2,CCND1,CDH2,CDK14,CITED1,CTNND1,CTSV,CYFIP2,DAB2,DUSP3,ELL2,ENC1,FGF2,FGFR1,FILIP1L,GCLC,GEM,GRIN2A,HK2,HSD17B1,ID1,IGFBP3,IGFBP4,LZTR1,MAPK14,MICOS10-NBL1/NBL1,MMP2,PGK1,PLAT,PRKD1,PSIP1,PTGER2,PTGS1,RAB1A,RAB31,SGK1,TFRC,TGFBR2,TIMP1,TIMP2,TNFRSF11B,TOB1,TP53,TUBA1A
IGF1	0.248	growth factor		-0.161	-0.183	3.48e-05	ADA,AGTR2,ANPEP,APP,AQP4,ATP2A1,BAX,BCL2,BGN,CCN2,CCND1,CCNG1,CD44,CEBPB,CISH,CITED2,COL2A1,CTSD,CYFIP2,DCLK1,DDIT4,DUSP6,EGR2,FGFR1,FJX1,GADD45A,GADD45G,GAPDH,GCK,GPD2,HMOX1,ID1,IGFBP3,IGFBP4,IGFBP5,IRS1,IRS2,LCN2,LDHA,LEPR,Ly6a (includes others),MMP14,MMP2,NCAM1,NOX4,OXT,PDGFRB,PHLDA1,POLD4,PPP1R1B,RUNX2,SGK1,SLC20A1,SLC2A4,SLPI,SPP1,SYN1,TGFB1,TNFRSF11B,TP53,UGCG,VCAM1
NFIX	0.149	transcription regulator		0.218	0.213	3.55e-05	ALAS1,CCND1,CHI3L1,CKM,CLEC3B,ENO3,NFATC4,POSTN,SERPINA3
SOX6	-0.58	transcription regulator		0.256	0.258	3.55e-05	BMP6,CCND1,COL2A1,HSPG2,MYL1,NPM1,RUNX2,TNNI2,TP53
IL4	-0.098	cytokine		0.241	0.21	3.78e-05	ABLIM1,ALAS1,ALOX12,ANO1,ANXA1,APRT,ARG1,ASS1,ATP2A1,ATP5MD,BAX,BCL2,BNIP3,BPGM,Bst2,CAT,Ccdc50,CCN2,CCND1,CD163,Cd24a,CD276,CD44,CHST3,CISH,CITED2,CLCN3,COL1A2,CPOX,CTSK,CYSLTR1,DDAH1,DPP4,EGR2,EXT1,F13A1,F2R,FADS1,FAM162A,FCGR2A,FLRT2,FLT3LG,GADD45G,GATA3,GBP6,GCAT,HIPK2,HK2,ID3,IGFBP4,Iigp1,IL33,JAK1,KCNAB2,KCTD12,KLHDC2,KLK3,KSR1,LAMP2,LEF1,LIF,LIFR,LIPG,LRP1,LRPPRC,LRRC8C,Ly6a (includes othe…
ETV5	0.228	transcription regulator		1.822	1.816	4.09e-05	AQP5,BAX,CCND1,CDH2,CHI3L1,CHSY1,CLIC5,COL4A3,EGFL6,FXYD5,GALNT3,KRT80,LCN2,MAF,MET,MMP14,MMP2,RET,SOAT1,SPP1,WWTR1	CDH1,Collagen type I (complex),ETV5,NFkB (complex),RUNX2
MAP3K5	-0.153	kinase		0.745	0.727	4.3e-05	ACE,BAX,CCN2,CCND1,HMOX1,TGFB1,TGM1,TP53
IFNG		cytokine		-0.905	-0.933	4.42e-05	ACE,ADAMTS8,ADCY7,ALOX12,APP,ARG1,ARNT2,ASCL1,ASS1,AUTS2,BAX,BCAN,BCL2,BCL2L2,BMP6,Bst2,CAPN3,CAT,CCN2,CCND1,CD163,Cd24a,CD276,CD44,CDH2,CEBPB,CHST3,CISH,CLIC5,COL1A2,CRABP1,CTSD,CTSK,CTSV,CTSZ,DEGS1,DEPP1,DPP4,EDNRB,EEF1A1,EFCAB6,EGR2,ESM1,F2R,FCGR2A,FGF1,FGF2,FGL2,FLRT2,FZD1,GATA3,GBP6,GCK,GJA5,GNG7,GUSB,Gvin1 (includes others),H4C9,HK2,HMOX1,HSP90AB1,HSPG2,HTRA1,ID1,IDH3B,IGFBP4,Iigp1,IRAK1,IR…
isobutylmethylxanthine		chemical toxicant		0.811	0.795	4.51e-05	ACE,AEBP1,APLN,CCK,CCN2,CCND1,CD44,CEBPB,COL1A2,Cox5b,Cox8b,CRABP2,CYCS,EGR2,ELOVL3,ENC1,GAPDH,IBSP,LDHA,MMP2,Mt1,Mt2,NDUFS1,PDGFRB,PLAAT3,PLAT,SGK1,SNAI1,SOD2,TGFB1,TIMP1,TIMP2,TNC,UQCRC1,UQCRC2
TGFB3	-0.077	growth factor	Activated	2.051	2.029	4.85e-05	ASPN,BCL2,CCN2,CDH2,COL1A2,COL2A1,EEF1D,FGF2,GATA3,HTRA1,LEF1,LTBP2,MAPK11,MGP,MMP2,S1PR3,SERPINE2,SNAI1,TGFB1,TNC,TNFRSF11B	AHR,MAPK8,NFkB (complex),PPARGC1A,SP1,TGFB3,TP53,estrogen receptor
TGFB2	-0.024	growth factor	Activated	2.454	2.441	4.94e-05	ASPN,CCN2,CDH11,COL1A2,EGR2,FGF2,HMOX1,HSPG2,LIPG,MMP2,PDGFRB,RGS3,RUNX1,RUNX1T1,S100A8,SPP1,TGFB1,TGFBR2,TIMP1,TIMP2,TNFRSF11B,VDR	AHR,CREBBP,ESR1,NFkB (complex),P38 MAPK,PPARGC1A,RB1,RUNX2,SMAD7,SP1,TAF4,TGFB1,TGFB2,TP53,Tgf beta,estrogen receptor
S100A4	-0.05	other		0.847	0.837	4.98e-05	BAX,BNIP3,MMP14,MMP2,NOTCH2,PF4,S100A8,SNAI1,TIMP1,TIMP2,TP53,VCAM1
TFE3	0.007	transcription regulator		-1.557	-1.576	4.98e-05	ATP5PO,Cox5b,COX7A1,Cox8b,CTSK,CYCS,ELOVL3,GCK,HK2,IRS2,NDUFV2,PHOSPHO1
SMAD7	-0.175	transcription regulator	Inhibited	-2.894	-2.885	5.3e-05	ACVR1,ACVR1B,BGN,BMPR1B,CCN2,CDH2,CITED2,CKM,COL1A2,COL2A1,GADD45A,HMOX1,ID1,ID3,ITGBL1,LTBP2,LTBP3,MATN2,MET,MMP2,MYLPF,PLAT,PMEPA1,TGFB1,TGFBR2,TIMP1	AHR,MAPK8,MYOD1,NFkB (complex),NR4A3,P38 MAPK,PPARGC1A,RB1,RUNX2,SMAD7,SP1,TGFBR1,TP53,estrogen receptor
APC	-0.117	enzyme		0.847	0.857	5.76e-05	AMHR2,CCK,CCND1,CD44,CDH2,CS,DPP4,EPHB3,HK2,ID1,ID3,IDH3G,IGFBP5,PRKCZ,PTGS1,SGK1,SNAI1,SPP1,SUCLG1,TIMP1,TNFRSF11B,TNFRSF19,TP53
IKBKB	0.088	kinase		1.662	1.636	5.96e-05	AEBP1,BAX,BCL2,CCN2,CCND1,CD44,CEBPB,CTSK,CTSZ,DUSP6,ENPP2,GADD45A,GM2A,GRN,HK2,HMOX1,LCN2,LIFR,MGP,MMP2,Mt1,Mt2,MYO1D,NAGLU,OGN,PLD3,POSTN,PTX3,RBP1,SERPINE2,SGK1,SNAI1,SOD2,TGFB1,TGFBR2,TIMP2,TNC,TNFAIP2,TNFRSF11B,TP53,TP63,VCAM1	AHR,Akt,CHUK,IKBKB,MAPK8,NFkB (complex),P38 MAPK,PPARGC1A,RUNX2,SP1,TP53,estrogen receptor
trans-hydroxytamoxifen		chemical drug	Activated	2.584	2.591	6.12e-05	ACVR1,ADCY9,ARNT2,CBX6,CHI3L1,CITED2,COL1A2,COL4A5,DDIT4,ENC1,EPB41L3,FAP,FGF9,GCLC,GNE,IGFBP4,LDHA,LHFPL2,LITAF,MATN2,MB,MMP2,NELL2,PPP1R3C,PVALB,RAB31,RUNX1,SERPINF1,SLIT2,TGFBR2
ERBB2	0.232	kinase		-0.365	-0.389	6.14e-05	AIMP2,ALAS1,AR,ATP6AP2,ATP6V1A,BCL2,BNIP3,CADM1,CAPZA2,CCN2,CCND1,CD47,CDH11,CDH2,CEBPB,CHCHD10,CLEC3B,CRYBG1,DHRS7,DSG2,DUSP6,ELL2,EPHB2,F2R,FGF7,FGF9,FSTL1,GALNT3,GATA3,GBP6,GPD2,H19,HTRA1,ID1,IGFBP3,IGFBP4,IGFBP5,IRX3,JAK1,KCNN4,KLHDC3,KLK3,LAMP2,LCN2,LDHA,LITAF,LTBP2,LTBP3,LUM,MAF,Marcks,MCM6,MFAP2,MMP11,MMP14,MMP16,NDRG4,NDUFAB1,NEDD9,NNMT,NOX4,NPTX2,NUCB2,PDHA1,PDIA4,PGK1,PGM1,PLAT,PMEPA1,P…
KLF11	0.567	transcription regulator		-0.221	-0.227	6.34e-05	ADAMTS1,ADAMTS8,BCL2,CAT,CCN2,CEBPB,COL1A2,CPT1B,DIO2,ELOVL3,FABP3,GREM1,IDH3A,LTBP1,MMP14,MMP2,PLAT,SERPINA1,SNAI1,SOD2,TGFB1,TGFBR2,TGIF1,TIMP1,TIMP2
homocysteine		chemical - endogenous mammalian	Activated	2.24	2.227	6.46e-05	ADM2,BAX,BCL2,CCND1,EEF1A1,EEF1D,FGF1,FGF2,GADD45A,HMOX1,ID1,MMP2,PHLDA1,TIMP1,TP53,TRIB3,VCAM1	AHR,Akt,ERK,ESR1,NFkB (complex),P38 MAPK,PARP1,PPARGC1A,RUNX2,SP1,TP53,estrogen receptor,homocysteine
TP63	0.846	transcription regulator		0.08	0.06	6.74e-05	ADA,ADAMTS1,ADH7,ALOX12,ARG1,BAX,CA4,CCN2,CCND1,CCNG1,CDH2,CITED2,COL4A3,CTSD,CYP2F1,DDAH1,DDIT4,DKK3,DUSP6,F2R,FBN1,FUT1,GADD45A,GAL,GAPDH,GLS2,GREM1,HK2,HTRA1,ID1,ID3,IGFBP3,KCNG1,KCNK1,KLK3,LIMK2,MLH1,MMP14,P2RY2,POSTN,PPP1R13L,PRKCZ,RBMS3,RUNX1,RUNX2,S100A8,SERPINF1,SLIT2,SNAI1,SPON1,SYT7,TGFB1,TGFBR2,TNC,TP53,TP63,VAMP4,VDR,WWTR1
Akt		group		1.983	1.971	6.77e-05	AIMP2,AR,ATP5F1A,BAX,BCL2,CCN2,CCND1,CD44,CEBPB,COL2A1,CTSD,EGR2,GCK,HK2,HMOX1,KL,LCN2,LEF1,MAP2,MMP14,MMP2,NDUFB8,NOTCH2,NOX4,NRP2,PPP1R1B,PTGER2,PTGS1,PTX3,RUNX2,SGK1,SLC1A2,SLC2A4,SNAI1,SOD2,SPP1,TNC,TP53,UQCRC2,VCAM1	AHR,Akt,CHUK,CREBBP,ERK,ESR1,NFkB (complex),P38 MAPK,PPARGC1A,RB1,RUNX2,SP1,TAF4,TP53,estrogen receptor
CCR2	0.489	g-protein coupled receptor		1.465	1.445	6.78e-05	AEBP1,APP,ARG1,ASPN,B3GAT2,BGN,CD163,COL12A1,COL14A1,COL1A2,F13A1,FBN1,HSPG2,LUM,MMP2,OGN,SLPI,TGFB1,TGM2,TIMP1,TIMP2,TNC
LY294002		chemical - kinase inhibitor		-0.224	-0.186	7.13e-05	ACAT1,ADAMTS1,AGTR2,ANPEP,AR,ART3,BAX,BCL2,CA9,CCN2,CCND1,CD44,CEBPB,CLCN3,COL1A2,CST3,DUSP6,EDIL3,EGR2,EMILIN1,Esrra,F2R,FGF2,FGF7,FLRT2,GCK,GCLC,GDF5,GEM,GPD2,GRN,HMOX1,HSP90AB1,IGFBP3,IGFBP5,IRS1,IRS2,ITGBL1,LCN2,LIF,MAF,MAP2,MMP14,MMP2,NPTX1,PGK1,PHLDA1,PIK3R1,POSTN,PTGER2,RAP1A,RUNX2,RXRG,SGK1,SLC2A4,SNAI1,SPP1,TAC1,TGFB1,TP53,TP63,VAMP1,VCAM1
DDX5	-0.014	enzyme		-1.467	-1.474	7.15e-05	BAX,CCND1,COL2A1,HTRA1,LCN2,TGFB1,TIMP1,TP53
FBN1	0.548	other		-1.038	-1.023	7.15e-05	CCN2,COL1A2,FBN1,LTBP1,LTBP3,MMP2,RUNX2,TGFBR2
ERK1/2		group		0.684	0.661	7.31e-05	APLN,ARRB1,BAX,BCL2,CALR,CAT,CCK,CCN2,CCND1,CD44,CEBPB,CMA1,COL2A1,CTSV,FGF2,FZD1,H19,HK2,ID1,ID3,IGFBP3,IL17RD,IRS2,KCNH2,LEPR,MMP2,NAMPT,NOX4,POSTN,PRKCZ,PTGER2,RUNX2,SGK1,SNAI1,SPP1,SSTR3,TAC1,TAPBP,TIMP1,TIMP2,VCAM1
CIP2A	0.088	other		-0.401	-0.392	7.34e-05	BCL2,DSC2,ENO3,FAP,GADD45A,HK2,LRP4,LUM,MFAP5,NPTX1,PDGFRB,RAB31,SERPINE2,SLC16A3,SLC25A4
PKM	-0.332	kinase		-0.661	-0.675	7.34e-05	ALDOA,CCND1,CDH2,ENO3,FBP2,GAPDH,HK2,LDHA,MMP2,NDUFB8,PDHA1,PGAM2,PGLS,SDC2,UQCRC2
levodopa		chemical - endogenous mammalian		-1.677	-1.683	7.38e-05	ABHD14B,ADRA2C,APLP1,ARMH4,BAX,BCL2,BICC1,CCND1,CIB2,CITED4,COCH,Cox5b,CTSZ,DDOST,DIXDC1,DPP7,DUSP6,EDNRB,EGR2,EIF4EBP2,Foxp1,FRAT2,FXYD5,GABRB3,GAPDH,GLB1,GNE,GNG7,GOLIM4,GPD2,GRID2,HEXA,HEXB,HTATIP2,HVCN1,IGFBP5,INSC,KCNC4,KCNK1,LAMP2,LTBP1,MAPK11,MMP14,NAGLU,NDUFA5,NDUFA8,NDUFS4,NPTX2,PALM,PARM1,PFKP,PIEZO2,PIK3R1,PPP1R1B,PPTC7,Ptprd,PTPRT,PVALB,Rab15,RASGRP1,RELL1,ROBO2,SCN4B,SERPINB6,SLC1A2,…
ACVR1	0.293	kinase		-1.078	-1.091	7.72e-05	AMHR2,AUTS2,EDIL3,FSTL1,IBSP,ID1,IL33,LEF1,OGN,SRPX2,VCAM1
TWIST2	0.048	transcription regulator	Activated	2.618	2.615	7.72e-05	CCND1,CD44,CDH2,CKM,DUSP6,FBLN5,H19,MAF,POSTN,SNAI1,TGFB1	CDH1,NFkB (complex),TWIST2
VCAN	-0.308	other		-0.313	-0.315	7.94e-05	AEBP1,ANXA8/ANXA8L1,ASS1,Calm1 (includes others),CBX6,CEBPB,COMP,CRISPLD2,ENPP2,FBLN5,GLB1,IGFBP4,LCN2,METRNL,OGN,OLFML2B,PAM,PRDX5,RBP1,SOD2,TGFB1,TIMP1,TMEM204,TP53,Tpm1,VCAM1
alendronic acid		chemical drug		1.134	1.128	8.19e-05	BCL2,ENPP1,EPHB3,FGF2,IBSP,ID1,TNFRSF11B
hydroxyflutamide		chemical drug		-0.668	-0.662	8.19e-05	AR,BCL2,KLK3,TGFBR2,UGDH,VCAM1,WIF1
SUB1	-0.08	transcription regulator		-1.238	-1.244	8.41e-05	BAX,CAMK2B,CCND1,CNTFR,FJX1,GADD45A,KCNG1,NDUFAB1,NDUFB8,NDUFB9
PIK3CA	0.002	kinase		-0.763	-0.766	8.58e-05	CA9,CCND1,Cd24a,CD44,CDH2,CEBPB,GCK,HSP90AB1,IRS1,IRS2,PDGFRB,PROCR,SNAI1,TGFB1,TGM1,TP63
PDX1		transcription regulator		0.374	0.367	8.98e-05	ALB,ATF5,ATP5PF,CAT,CCND1,CD44,COL25A1,DUSP6,EDEM3,FGF1,FGF2,FGFR1,FUT1,GCK,GRN,GUSB,ID1,ID3,IGFBP3,IRS2,MAP2,Mt1,NDUFB9,NPTX2,PAPSS2,PDIA4,PHGDH,PNPO,SPP1,TRIB3,TSPAN8
CCN2	0.771	growth factor	Activated	2.063	2.047	8.99e-05	ADAMTS1,BCL2,BCL2L2,CCN2,CCND1,CD44,COL2A1,EMILIN1,LEF1,LTBP3,MMP14,MMP2,PTGFR,SDC4,SFRP4,TGFB1,TIMP1,TP53,Tpm1	Akt,CCN2,ERK,FOXM1,NFkB (complex),P38 MAPK,PPARGC1A,RB1,RUNX2,SMAD7,SP1,TGFB1,TP53,YBX1,estrogen receptor
MET	-0.248	kinase		0.94	0.923	9.01e-05	BCL2,CAMK2B,CCND1,CD44,CDH2,CITED2,CTSV,DAB2,FGL2,GATA3,GCLC,HMOX1,MAD1L1,MMP2,NOX4,NREP,PTPRT,RUNX1,SNAI1,SOD2,SPP1,TGFB1,TGIF1
TGFA	0.198	growth factor		-0.356	-0.373	9.55e-05	ALB,CCN2,CCND1,CEBPB,DDX3X,FGF7,HSD17B1,IGFBP4,LCN2,PLA2G5,PLAT,PTGS1,SERPINA1,SLC1A2,SLPI,TGFB1,TP53
Insulin		group		0.068	0.054	9.58e-05	ACAT1,ACTC1,AEBP1,ALB,ALDOA,APLN,APP,ARRB1,BCL2,CCK,CCN2,CCND1,CEBPB,COL1A2,Cox5b,Cox8b,CRABP2,CREB3L3,CTH,CYCS,DDIT4,EGR2,ELOVL3,ENPP2,FADS1,GCK,GCLC,HMOX1,HSP90B1,IGFBP3,IGFBP4,IRS1,IRS2,KLK3,LDHA,LEPR,MCM6,MMP2,NDUFB9,NDUFS1,NUCB2,PDGFRB,PGK1,PIK3R1,PLAAT3,PRKAA2,PRKCZ,RBP4,RPS6,SGK1,SLC29A1,SLC2A4,SLC37A4,SNAI1,TGFB1,TNC,UCP2,UQCRC1,UQCRC2
SOD1	0.114	enzyme		0.447	0.458	0.000102	APP,ASS1,BAX,BCL2,CCND1,CDH2,CDK5,CYP2F1,FAP,FGFR1,GCLC,GNG4,GNG7,HDDC3,HIVEP3,HMOX1,KCNAB2,KCNC4,KCNS1,LOC728392,LRRTM4,MET,Mt1,Mt2,MYOM1,NDUFAF1,PITPNA,PRPH,RUNX2,SLC1A2,SLC40A1,SOD2,SPP1,TFRC,TGFB1,TGFBR2,TP53,VCAM1
MECP2	0.004	transcription regulator		-0.088	-0.091	0.000103	ANXA1,CAMK2A,CAMK2B,CDH2,DPP4,EHMT2,FXYD1,GABRB3,GRIN2A,GSTO1,HOXD9,IGFBP3,IRAK1,KCNA1,MET,Mt1,NRP2,PDGFRB,PLAAT3,PLXNA3,SDC2,SGK1,SRPX2,SYN1,UNC5C,UQCRC1
POU4F1	-0.076	transcription regulator		-0.809	-0.809	0.000109	ACTC1,BAX,BCL2,CACNB3,CRABP1,GAL,GATA3,IRX3,MSC,MSI2,MYL1,NXPH4,PIEZO2,PRPH,PVALB,RET,RGMA,RUNX1,SYT9,TAC1,TFAP2B
PSEN1	0.054	peptidase		0.737	0.739	0.000112	ALB,ALDOA,APP,ATP5F1A,ATP5PF,ATP6V1A,BASP1,BAX,CALML3,CCND1,CDH2,CS,CTSD,CTSZ,CUEDC1,CYCS,CYFIP2,DHRS7,DYNLL2,ELOVL4,ENPP2,F2R,GAPDH,GRIN2A,H4C9,HSD17B1,KCNAB2,LHX8,LRP1,MAP2,NCAM1,NDUFA5,NDUFA8,NDUFS4,PDGFRB,PGAM1,PGK1,PIK3R1,PRDX5,PVALB,SLC1A2,SUCLG1,SYN1,TGFB1,TGFBR2,TNXB,TP53,TPI1,Tpm1,TUBA1A,TUBA8,UCHL1
MAPT	0.172	other				0.000114	ACAT1,ALB,ALDOA,APP,ATP5F1A,ATP5PB,ATP5PF,ATP6V1A,BASP1,CALML3,CAMK2A,CCND1,CDK5,CS,CTSD,CYCS,CYFIP2,DLD,DYNLL2,EEF2,GAPDH,GEM,H4C9,LRP1,MAP2,MAPK11,NDUFA5,NDUFA8,NDUFS3,NDUFS4,NDUFV2,PGAM1,PGK1,PPP1R1B,PRDX5,PVALB,RAB10,RPL19,SLC16A3,SLC1A2,SRGAP3,SUCLG1,SYN1,TPI1,Tpm1,TUBA1A,TUBA8,UCHL1,UQCRC2,WASF1
VHL	0.073	transcription regulator		-0.226	-0.216	0.000115	BCL2,BNIP3,CA9,CCN2,CCND1,CDH2,DAB2,FILIP1L,GNG4,HMOX1,HSD17B1,MAF,MMP14,NEDD9,NOX4,NREP,RPS6,RUNX1,SLC16A3,SLC40A1,SOD2,TFRC,TP53,VCAM1
SATB2	0.6	transcription regulator		-0.213	-0.214	0.000117	AUTS2,BAX,ENPP1,LIMA1,MFAP2,MMP16,NNMT,NOX4,PIEZO2,PWWP3B,SDC2,SPP1
tosedostat		chemical drug	Activated	3.148	3.128	0.000118	ASS1,ATF5,CEBPB,CTH,DDIT4,GADD45A,PSAT1,SARS1,STC2,TRIB3
vitamin E		chemical drug	Inhibited	-2.898	-2.883	0.000119	ALOX12,BAX,BCL2,CAT,CD44,COL2A1,MMP14,MMP2,PLAT,PVALB,SPP1,TGFB1,UCP2,VCAM1	AHR,Collagen type I (complex),LDL,NFkB (complex),P38 MAPK,PPARGC1A,RUNX2,SMAD7,SP1,TP53,Tgf beta,estrogen receptor,vitamin E
PDLIM2	-0.371	other		0.603	0.604	0.000122	BCL2,CCND1,CITED2,CRISPLD2,DNAJC15,ENPP2,FSTL1,FXYD6,IGFBP3,KCTD12,NPR3,NUDT11,PHLDA1,PPP1R14A,RNF128,RTN2,SLC40A1,STC2
PIK3R1	-0.34	kinase		-1.739	-1.755	0.000122	AR,ATF5,BCL2,CCND1,CD44,COL1A2,HMOX1,HSP90B1,LDHA,MMP2,PDGFRB,PDHA1,PIK3R1,PIK3R2,SOD2,TGFB1,TRIB3,VCAM1	AHR,Akt,FOXM1,IKBKB,NFkB (complex),PIK3R1,PPARGC1A,PTEN,RB1,RUNX2,SP1,TP53,YBX1,estrogen receptor
doxorubicin		chemical drug	Activated	2.486	2.47	0.000123	ABCB4,ABCB9,ACTC1,ADAMTS1,ALB,ANXA1,APP,AR,ASB11,BAX,BCL2,BCL2L2,CAT,CCN2,CCND1,CD44,CD47,CDK14,CKM,CTSD,EEF1A1,EEF1B2,GADD45A,GCLC,GLB1,HIPK2,HMOX1,ID1,LCN2,LIMA1,MET,MMP2,MVP,MYLPF,NCAM1,NOX4,PMEPA1,PRKAA2,RUNX1,SDC2,SLC25A4,SNAI1,SOD2,SPP1,TFAP2A,TGFB1,TIMP1,TP53,TP63,Tpm1,TSPAN8,UGCG,UQCRFS1	AHR,CREBBP,ESR1,FOXM1,NFkB (complex),P38 MAPK,PI3K (complex),PPARGC1A,RB1,RUNX2,SP1,TAF4,TP53,YBX1,doxorubicin,estrogen receptor
NS-398		chemical reagent		-1.153	-1.138	0.000126	ARG1,ATP6AP2,BAX,BCL2,CCND1,CEBPB,COL1A2,EGR2,F2R,FAT1,FGF2,MMP14,MMP2,PTGS1,RUNX2,S100A8,SPP1,TFRC,TP53
OGT	0.16	enzyme		0.074	0.077	0.000126	AEBP1,APP,ARTN,BAX,CCND1,DLST,GNG4,MMP2,NDUFA5,NDUFA8,NDUFA9,NDUFB6,NDUFC2,NDUFS1,SUCLG1,TNC,TP53,UCHL1,WIF1
CEBPA	0.251	transcription regulator		0.227	0.212	0.000128	ADCY7,ADH7,ALB,ANPEP,ANXA1,APLN,AQP5,ARG1,ASCL1,ASPRV1,ASS1,BCL2,CCND1,CEBPB,CHI3L1,COL1A2,CRABP2,CTSK,CYCS,EGR2,EPHA7,FZD1,GADD45A,GAL,GAPDH,H1-10,HMOX1,ID1,IGFBP3,IGFBP4,IRS1,IRS2,LCN2,LEPR,LITAF,Ly6a (includes others),MSI2,PPP1R14A,PPP1R3C,PTGFR,PTGS1,PTPN3,PTX3,RAB31,RUNX2,S100A8,SERPINF1,SLC2A4,SOD2,SPP1,TAC1,TFAP2A,TNFRSF19,TSC22D3,VDR
IL6R	0.047	transmembrane receptor		-1.391	-1.407	0.000128	CCK,COL1A2,COL2A1,GAL,GREM1,IGFBP5,LCN2,MMP2,NAMPT,SERPINA3,TAC1,TGFB1,TGFBR2,TIMP1,TNFRSF11B,VCAM1
aspirin		chemical drug		-0.102	-0.079	0.000129	ACVRL1,APLN,APP,AR,BCL2,BMP6,CADM1,CCND1,CTSD,DPP4,EDNRB,FBLN5,FBN1,FGF18,GRIN2A,IGFBP3,IL17RD,LAMP2,LIFR,MMP11,MMP2,NOX4,PDGFRB,POSTN,PTGS1,TGFB1,TP53,VCAM1
Hdac		group		0.183	0.183	0.000133	ADAMTS1,AGTR2,BCL2,CCND1,CRABP2,DKK3,EDNRB,GATA3,HOXD11,HTRA1,IGFBP3,IRX3,KCNH2,LRP4,MEOX1,MMP14,NDRG4,PIK3R5,ROBO2,SMARCD3,SPP1,TFAP2B,TGFBR2,THBS4,TP63,WIF1
INSR	0.073	kinase	Inhibited	-3.637	-3.664	0.000136	ACADVL,ALB,ARHGEF2,ATP5F1A,ATP5MC3,ATP5PF,ATP5PO,Calm1 (includes others),CCN2,CCND1,Cox5b,Cox8b,CPT1B,CS,CTSV,CYC1,CYCS,EGR2,Esrra,ETFDH,FEM1A,GADD45A,GAPDH,GCK,GRN,H19,IDH3A,Iigp1,IRS1,LEPR,MMP11,MMP2,NAMPT,NDUFA9,NDUFB9,NDUFV2,OGN,PDHA1,PHLDA1,PRKD1,RTN2,SLC20A1,SLC29A1,SLC2A4,SUCLA2,TGFB1,TGIF1,UCP2,UQCRC1,UQCRC2,VCAM1	Akt,INSR,IRS1,NFkB (complex),PPARGC1A,RUNX2,SP1,TP53
HOXA10	0.138	transcription regulator		1.583	1.594	0.000137	AIMP2,CTSV,CYP2F1,DPP4,EGR2,ENPP2,ERG,FZD1,HOXD9,ID1,IGFBP3,IGFBP5,INMT,IRX3,LCN2,LEPR,MAX,MICOS10-NBL1/NBL1,NCAM1,NUDT3,PDPN,PHGDH,PIK3R1,PPP1R13L,RBP1,SFRP4,SLC27A6,STK17B,TNXB,TP53
TGFBR2	0.323	kinase		0.381	0.377	0.00014	ALOX12,AR,BGN,BMP6,CCN2,CCND1,CD44,CDH2,COL1A2,DSG2,FGF2,FGF7,FGF9,GAL,Kcnn2,MAN2B2,MMP14,MMP2,NIPA2,PDPN,RBMS3,RUNX2,SLC1A2,SNAI1,SPP1,SVEP1,TGFB1,TGFBR2,TGIF1,TIMP1,TNFRSF11B
arsenic trioxide		chemical drug		0.839	0.838	0.00014	ATP1B2,ATP5MC3,ATP5PB,ATP6V1A,BAX,BCL2,BNIP3,CALR,CCND1,CD44,CST3,CTH,CYB5R1,CYC1,CYP26A1,ERP29,FADS1,GCLC,HMOX1,HSP90AB1,HSP90B1,MAF,NDUFA12,NDUFA8,NDUFB2,NDUFB6,NDUFB8,NDUFC2,NPM1,PDIA3,PDIA4,PIK3R2,PPIF,RAB31,RAP1A,S100A8,SLC20A1,TFRC,TGIF1,TP53,TP63,UQCRFS1,VDR
NR4A3	-0.451	ligand-dependent nuclear receptor		-1.897	-1.904	0.00014	ATP5F1A,BAX,CCND1,COL16A1,ENO3,FBP2,MB,MYH1,MYH4,NDUFA5,NDUFB8,PDPR,TBX6,UCP2,UQCRC2	Akt,NFkB (complex),NR4A3,PPARGC1A,RUNX2,SP1,TP53
MAP4K4	-0.017	kinase	Activated	3.841	3.87	0.000143	ACADVL,Calm1 (includes others),CEBPB,CHSY1,COX11,CYC1,DLAT,DLD,DLST,GRHPR,MAFB,NDUFA5,NDUFAB1,NDUFS1,NDUFS4,PAPSS2,PGAM1,PGM1,SLC2A4,SUCLG1,UQCRC1,UQCRFS1
RB1	-0.041	transcription regulator	Inhibited	-4.645	-4.657	0.000145	ACTC1,Actn3,APPL2,ASPN,ATP5F1A,BAX,BCL2,BNIP3,CCN2,CCND1,CD44,CHCHD3,CITED2,CKM,COQ7,COX14,CYSLTR1,DIO2,DLAT,DLST,Esrra,FGF2,FXYD1,GPR176,GPR27,GPRC5C,GSTO1,ID1,IDH3B,INMT,KCNK1,MAF,MCM6,MET,MMP2,MRPS23,MYH4,MYL1,NDUFA5,NDUFA9,NDUFB8,NDUFS4,OPA1,PGAM2,PMEPA1,PTGS1,PTX3,REEP1,SOD2,SRPRA,TGFB1,TNNC2,TNNI2,TP53,TP63,Tpm1,TRIM72,TUBA1A,UQCRC1,UQCRFS1	Akt,ERK,FOXM1,NFkB (complex),P38 MAPK,PPARGC1A,PTEN,RB1,RUNX2,SP1,TP53,YBX1,estrogen receptor
MTPN	-0.103	transcription regulator		-0.67	-0.698	0.000145	ANXA1,BAX,BCL2,BCL2L2,BNIP3,Calm1 (includes others),CASQ1,CCND1,COL1A2,Mt1,MYH1,MYL1,PLAT,S100A8,SPP1,TGFB1,TUBA1A,VCAM1
thioacetamide		chemical toxicant		1.261	1.238	0.000148	ADAMTS1,ANXA1,BGN,CCN2,Cd24a,CD44,COL1A2,CPT1B,DKK3,EDNRB,F2R,FBLN5,FBN1,FCGR2A,FSTL1,FXYD6,HSD17B1,IGFBP3,LCN2,LTBP1,LYVE1,MCM6,MET,MMP14,MMP2,PIK3R2,PLPP3,PTPRS,SCPEP1,SPP1,TGFB1,TGIF1,TGM2,TIMP1,TIMP2,TMC5,Tpm1,TSPAN8
NFAT5	0.025	transcription regulator		1.668	1.646	0.000149	AQP2,AR,COL1A2,DDIT4,HECW2,IRAK1,LCN2,LIF,NOX4,PFKP,PLAT,PRSS35,PTGS1,SGK1,SLC14A2,SLC5A3,SPP1,TNFAIP2,TNFRSF11B	AHR,FOXM1,NFAT5,NFkB (complex),PPARGC1A,RB1,SP1,TP53,YBX1,estrogen receptor
heparin		chemical - endogenous mammalian		-1.905	-1.914	0.000149	ACADVL,ALAS1,ATP5F1A,CCND1,CS,EPHB2,IGFBP3,MMP14,MMP2,NDUFA9,PF4,PLAT,PROCR,RUNX2	Akt,Collagen type I (complex),ERK,NFkB (complex),PPARGC1A,RUNX2,SMAD7,SP1,TP53,Tgf beta,estrogen receptor,heparin
miR-16-5p (and other miRNAs w/seed AGCAGCA)		mature microrna		1.46	1.497	0.000157	BCL2,BCL2L2,CACNA2D1,CADM1,CCND1,CDC14A,DTD1,FGF2,FGF7,FGFR1,GFPT1,GRN,HMOX1,HSP90B1,KCNN4,NFIA,NOTCH2,NPR3,PHKB,PPIF,PSAT1,RAB21,SERPINE2,SHOC2,SLC12A2,SLC16A3,SLC38A1,SRPRA,TPI1,TPPP3,UCP2,UGDH
cisplatin		chemical drug		0.174	0.155	0.000163	ACADVL,ADAMTS1,AHNAK2,ALB,ANK1,ANPEP,ANXA1,AQP2,BAX,BCL2,CAT,CCN2,CCND1,CCNG1,CD44,CDK5,CMBL,CPT1B,CTNND1,CXCL14,CYP26A1,DDIT4,DPYSL5,DUSP6,EPS8L2,FCGR2A,FXYD5,GADD45A,GLS2,GRIN2A,HIPK2,HJURP,HK2,HMOX1,IER5,IGFBP3,KERA,KLK3,LCN2,MAD1L1,MET,MGP,MLF1,MMP2,Mt1,NCAM1,NOX4,NREP,PCGF2,PDE4A,PFKL,PGM1,PHGDH,PLAT,PROCR,RBP4,RGL1,RPS5,RPS9,RUNX1,SCN4B,SLC25A4,SLC31A1,SMOX,SPP1,STK17B,TARS3,TFAP2A,TGFB1,TG…
NOS2	-0.328	enzyme		1.183	1.178	0.000168	ACTC1,APP,AQP2,AR,BAX,BCL2,BNIP3,CD44,CHI3L1,COX7A1,CYCS,DDX3X,H19,HMOX1,IRAK1,IRS1,IRS2,LCN2,LPAR1,MB,PTGS1,S100A8,SERPINA3,SLC2A4,SLC40A1,TGFB1,Tgtp1/Tgtp2,TIMP1,TNNT3
CHUK	-0.027	kinase		1.544	1.513	0.000174	AEBP1,CCND1,CEBPB,CTSZ,DUSP6,ENPP2,GM2A,GRIN2A,GRN,HK2,HMOX1,KCNH2,LCN2,LIFR,MFAP5,MGP,MMP2,Mt1,Mt2,MYH1,NAGLU,OGN,PLD3,PTX3,RBP1,SERPINE2,SGK1,SPP1,TNFAIP2,TNFRSF11B,TP53,TP63,VCAM1	AHR,Akt,CHUK,IKBKB,NFkB (complex),PPARGC1A,RB1,RUNX2,SP1,TP53,estrogen receptor
ADIPOR1	-0.143	transmembrane receptor		-1.414	-1.426	0.000175	ARG1,BCL2,CAT,CYCS,Esrra,SLC2A4,SOD2,TP53
IREB2	-0.067	translation regulator		-1.45	-1.446	0.000175	APP,CYCS,HK2,LDHA,NDUFS1,TFRC,TP53,UQCRFS1
cadmium chloride		chemical toxicant		1.822	1.811	0.000185	ALB,AR,CCND1,CDH2,EEF1D,GADD45A,GCLC,HMOX1,KLK3,LPAR1,Mt1,Mt2,SNAI1,TP53	Akt,CREBBP,ERK,ESR1,MAPK8,NFkB (complex),P38 MAPK,PPARGC1A,RB1,RUNX2,SP1,TAF4,TP53,cadmium chloride,estrogen receptor
ADM	0.127	other		-0.861	-0.854	0.000187	ACE,BAX,BCL2,FGF2,MAX,PGK1,SPP1,TAC1,TGFB1,TNFRSF11B,VCAM1
DCN	-0.04	other		0.872	0.875	0.000194	BAX,BGN,CCN2,CKM,COL1A2,FBN1,FGF2,IRS1,MET,MMP2,TGFB1,TP53,VCAM1
iron		chemical - endogenous mammalian		-0.218	-0.218	0.000194	APP,BMP6,CCND1,GADD45A,GADD45G,HMOX1,ID1,LCN2,Mt1,NDUFS1,SLC40A1,SOD2,TFRC
oleic acid		chemical - endogenous mammalian		0.037	0.029	0.000197	ANKRD23,APP,ARG1,BAX,CPT1B,DEGS1,GADD45A,GAPDH,GCLC,HK2,HMOX1,IGFBP3,LCN2,Mt1,Mt2,PIK3IP1,PLIN5,SLC2A4,SOAT1,UCP2,VCAM1
P38 MAPK		group		1.611	1.58	0.000201	ANK1,AQP4,AQP5,ASS1,BAX,BCL2,BGN,BNIP3,CCK,CCN2,CCND1,CD44,CEBPB,CTSK,DIO2,EDNRB,EGR2,FGF2,GCLC,HMOX1,HTRA1,ID3,IGFBP5,KCNB1,LBX1,MMP2,MYLPF,NFATC4,POSTN,RAB7B,RBP1,RUNX1,RUNX2,SDC2,SGK1,SNAI1,SPP1,TGFB1,Tgtp1/Tgtp2,TIMP1,TIMP2,TNNC2,TNNT3,TP53,VCAM1,VDR	AHR,Akt,ERK,IKBKB,NFkB (complex),P38 MAPK,PPARGC1A,RB1,RUNX2,SMAD7,SP1,TP53,Tgf beta,estrogen receptor
SNAI1	-0.552	transcription regulator		-0.476	-0.473	0.000207	CCN2,CCND1,CDH2,COL1A2,COL2A1,ESPN,IBSP,ID1,LEF1,LIF,LIMA1,MMP14,PFKP,PTX3,RAB25,RUNX2,SLC29A1,SNAI1,TGFB1,TGFBR2,TMOD4,TP63,VDR,WASF1,WASF3
ZBTB7B	-0.197	transcription regulator		-1.911	-1.925	0.000209	ACADVL,ATP5F1A,COL1A2,COL2A1,Cox5b,COX7A1,CPT1B,DIO2,ELOVL3,GATA3,MAF,NDUFAB1,NDUFB8,NDUFV2,UQCRC2
simvastatin		chemical drug		1.253	1.259	0.000213	ABCB4,ACVR1,ADAMTS1,ANXA1,APP,AR,ARHGEF2,BAX,BCL2,CCN2,CCND1,CDK5,DDAH1,ENC1,F2R,FADS1,HMOX1,IGFBP3,LCN2,Ly6a (includes others),MMP2,PLAT,S1PR3,SDC4,SLC2A4,SOAT1,SPP1,TIMP1,TNFRSF11B,Tpm1,VCAM1
ALDH1A2	-0.157	enzyme		-1.342	-1.336	0.000222	BGN,CCN2,CD44,COL1A2,FGF2,IGFBP4,Ly6a (includes others),MAFB,SPP1,TIMP1
S100A9	-1.758	other		-0.123	-0.134	0.000224	ADAMTS1,APLN,BACE2,CCND1,CNTN6,CXCL14,DDIT4,ENPP2,FCGR2A,FXYD1,H19,IL33,LTBP1,MCF2L,MMP14,MMP2,MYH1,PHLDA1,PIK3IP1,POSTN,ROBO2,RXRG,S100A8,SGK1,Spink2,TUBA8,VCAM1
glutathione		chemical - endogenous mammalian		-0.87	-0.869	0.000228	ALB,ASS1,BAX,BCL2,CA9,CCND1,DLAT,GCLC,HMOX1,MET,PDGFRB,SOD2,TNC,VCAM1
GLIS2	0.096	transcription regulator		-0.956	-0.941	0.000233	CCN2,CCND1,LTBP2,MGP,MMP14,SNAI1,TGFB1
TERT	0.476	enzyme		0.287	0.283	0.000236	AR,BAX,BNIP3,CCN2,CCND1,DUSP6,F2R,FGF2,FUT4,GLB1,HTRA1,IGFBP4,IQGAP2,KLK3,LIPG,MMP14,MMP2,PTGS1,SASH1,SOD2,SPON1,SPP1,TP53
HINT1	0.081	enzyme		0.937	0.945	0.00024	BAX,BCL2,FADS1,TP53,TPSAB1/TPSB2
NACC1	-0.132	transcription regulator	Activated	2.236	2.232	0.00024	BAX,BCL2,MATN3,MATN4,TP53
naringin		chemical - endogenous non-mammalian		1.067	1.073	0.00024	BAX,BCL2,CAT,HMOX1,TNFRSF11B
fluticasone propionate		chemical drug		0.614	0.609	0.000243	BGN,CD163,CHI3L1,DDIT4,FBLN5,GAL,HTRA1,IRS2,NAMPT,OLFML2B,PAPSS2,PCOLCE2,PHLDA1,PTGER2,PTGS1,S100A8,SDC4,SERPINA1,SERPINF1,SLC29A1,SLPI,SPP1,TGFB1,TGM2,TIMP1,TSC22D3
trichostatin A		chemical drug		1.826	1.813	0.000249	ADAMTS1,APP,AR,ARG1,BAX,BCL2,BCL2L2,CA6,CA9,CCND1,CD28,CD44,CDH2,CISH,CLEC3B,COCH,COL1A2,COL2A1,CRABP2,CYP26A1,DDT,DDX3X,DSG2,EFNA3,EHMT2,ENPP2,EPHA3,EPHB3,F2R,FGF2,FGFR1,FLRT3,FRZB,GADD45A,GADD45G,GATA3,GCLC,HMOX1,ID1,ID3,IGFBP3,IRAK1,KLK3,LEF1,LEPR,LIMA1,LTBP1,MAD1L1,MAF,MAP2,MBNL1,MCM6,MET,MLH1,MOB2,NARF,NCAM1,NOTCH2,OLFM1,PGAM2,PITPNA,PLCE1,PLXNA3,PSAT1,PTGS1,RCC2,RET,ROBO1,RUNX2,SDC2,SFRP4,S…	AHR,Akt,CREBBP,ESR1,NFkB (complex),P38 MAPK,PPARGC1A,RB1,RUNX2,SP1,TAF4,TP53,decitabine,estrogen receptor,trichostatin A
calcitriol		chemical drug		-0.269	-0.265	0.000249	ABLIM1,ADCY9,ALB,APP,AR,BAX,BCL2,CA11,CASR,CCND1,CEBPB,CISH,CKM,COQ9,CPOX,CTSK,CYB5R1,DDAH1,EPHB2,FBN1,GADD45A,GADD45G,GAPDH,GATA3,GEM,HK2,ID1,IGFBP3,IGFBP5,KCTD12,KL,LCN2,LPAR1,LRPPRC,LTBP1,Ly6a (includes others),MAF,MTCH1,NCAM1,NDUFB2,NDUFV2,NEDD9,NOX4,NTHL1,OPA1,PDHA1,PDPR,PMEPA1,PPIF,PRDX5,PTCD3,PTGER2,PTGFR,RAB38,RUNX1T1,S100A8,SERPINA1,SERPINB6,SERPINB7,SLC2A4,SOAT1,SPP1,TGFB1,TNFRSF11B,TP5…
hydrocortisone		chemical - endogenous mammalian		-0.393	-0.399	0.000251	APP,AQP4,CCN2,CCND1,CD163,CDH11,CDH2,CEBPB,ERP29,FGF2,FGF7,FGF9,GPR153,IGFBP3,IGFBP4,IGFBP5,KLK3,Mt1,PTGS1,S100A8,STC2,TNFAIP2,TNFRSF11B,TP53
S100A8	-2.005	other		-0.453	-0.46	0.000256	ADAMTS1,APLN,BCL2,CCND1,CNTN6,CXCL14,DDIT4,ENPP2,FCGR2A,FXYD1,H19,HMOX1,IL33,LTBP1,MCF2L,MMP14,MMP2,MYH1,PHLDA1,PIK3IP1,POSTN,ROBO2,RXRG,S100A8,SGK1,Spink2,TUBA8,VCAM1
ALDH2	0.109	enzyme	Inhibited	-2.813	-2.794	0.000261	ATF5,CTH,GCLC,GNMT,PHGDH,PSAT1,SLC3A2,SLC7A3
CHI3L1	2.3	enzyme				0.000261	CDH11,COL16A1,IGFBP5,NAMPT,NNMT,PEG10,TGFBR2,TNC
LIPE	0.163	enzyme		0.707	0.701	0.000268	Actn3,ADH7,AQP4,CEBPB,CIB2,CITED2,COL1A2,FBP2,GAPDH,INMT,MYH4,PAM,PDHA1,PHKG1,POSTN,PVALB,RBP4,RUNX2,RXRG,SDC4,SLC2A4,SUCLA2,VAMP7
INS		other		0.659	0.655	0.000273	ACADVL,ANO1,ASPH,ATP5F1A,CAT,CCN2,CCND1,CEBPB,CITED2,CRABP2,EGR2,GCK,IGFBP3,IGFBP4,IGFBP5,IRS1,IRS2,NOX4,OXT,PTGS1,SLC2A4,SNAI1,TGFB1,TP53,TRIB3,UGCG
DIM-C-pPhOH-3-Cl		chemical reagent	Inhibited	-2	-2.013	0.000283	PGAM2,PHKG1,PYGM,SLC2A4
edelfosine		chemical drug		1.188	1.191	0.000283	AR,BAX,ERG,KLK3
CASZ1	-0.001	enzyme	Inhibited	-3.148	-3.142	0.000298	ABCC9,CASQ1,CKM,COL2A1,ENPP1,FGF18,MYOZ1,PPP1R1B,TNNI2,TP63
ESR1	-0.111	ligand-dependent nuclear receptor		-1.968	-1.977	0.00031	ABCB9,ABLIM1,ACE,ACTC1,ACVR1B,ADA,AK1,AR,ARHGEF2,ARRB1,ASS1,ATF5,ATP6V1A,BAX,BCL2,BCL2L2,CALML4,CAMK2B,CCND1,CCNG1,CDK5,CEBPB,CLCN3,COG6,COL13A1,COL16A1,Cox5b,Cox8b,CRABP2,CRIM1,CTSD,CYFIP2,CYP26B1,CYP2F1,DAB2,DCBLD2,DDIT4,DSG2,EHMT2,ENPP2,FAP,FGFR1,FLT3LG,FRAT2,FXYD6,GAL,GATA3,GEM,GLB1,GM2A,GREM1,H19,HACD1,HIPK2,HOXD11,HSP90B1,HTRA1,ID1,IGFBP3,IGFBP4,IGFBP5,Iigp1,INMT,IRS1,IRS2,JAK1,KCNQ4,KL,KLK…	AHR,Akt,CREBBP,ESR1,FOXM1,NFkB (complex),PPARGC1A,RB1,RUNX2,SP1,TAF4,TP53,YBX1,estrogen receptor
palmitic acid		chemical - endogenous mammalian	Activated	3.532	3.519	0.000311	ALDOA,BAX,BCL2,CCN2,CD28,CKM,CPT1B,CS,DEGS1,EEF1A1,GAPDH,GCK,GCLC,HK2,HMOX1,IRS1,IRS2,LCN2,MAFB,MET,Mt1,Mt2,NDUFA5,PROCR,SHOX2,SLC25A4,SLC2A4,TGFB1,TP53,TRIB3,UCHL1,UCP2,VCAM1	AHR,Akt,ERK,IKBKB,NFkB (complex),PPARGC1A,RB1,RUNX2,SP1,TP53,estrogen receptor,palmitic acid,reactive oxygen species
3-nitropropionic acid		chemical toxicant		0.979	0.974	0.000317	APP,ATP5PF,BAX,BCL2,GAPDH,GCLC,LDHA,NPM1,PPP1R1B,TAC1,TP53,TPI1
PAX3		transcription regulator		-1.018	-1.027	0.00032	ANXA1,APP,ASS1,COL1A2,CST3,CTSA,EGR2,EYA2,FGF9,FILIP1L,GLB1,HSPG2,ID3,IRS1,LBX1,LNPEP,MEOX1,MET,MGP,NEDD9,NNMT,OLFM1,PHGDH,PTPN14,PTPN3,RAB31,RET,TNC,TP53,TSPAN3
FGF19		growth factor		-0.371	-0.37	0.000329	AQP4,CCND1,ELOVL3,ENO3,FABP3,GADD45A,GAS2,GCK,HSD17B1,ID1,KL,LCN2,LEPR,SERPINA1,SERPINA3,SGK1,SLPI
RARA	0.15	ligand-dependent nuclear receptor		-0.195	-0.196	0.000331	ABLIM1,AR,ARNT2,ATF5,ATP6V0A4,CCND1,CD44,CEBPB,CRABP2,CTNNA3,CTNND1,CYP26A1,CYP26B1,EGR2,ELL2,FGFR1,FUT4,GATA3,GCK,GJB4,HOXD10,KLK3,LIFR,MAFB,MGP,MMP11,NEDD9,OXT,PGLS,RAP1A,RBP1,RET,RGS3,RUNX1,SLC17A9,SPP1,STRA6,TAPBP,Tdh,TFAP2A,TGFB1,TLE4,TNFRSF11B,TP63,XK
EPAS1	-0.103	transcription regulator		0.528	0.501	0.000335	APLN,ARG1,BCL2,BNIP3,CA9,Calm1 (includes others),CAT,CCN2,CCND1,CEBPB,CITED2,CKM,FGF2,GLB1,IGFBP3,IGFBP5,IRS2,LDHA,MB,MMP14,MYH4,NAMPT,NDUFB6,RET,SLC29A1,SLC2A4,SLC40A1,SOD2,STC2,TGFB1,TGFBR2,TNFRSF11B,TP53,VCAM1
SP1	0.042	transcription regulator	Activated	2.445	2.412	0.000335	ACVRL1,ADA,ADAMTS1,AEBP1,ALOX12,ANK1,AR,ASS1,BACE2,BAX,BCL2,CAT,CCN2,CCND1,CD28,CDH2,CEBPB,CHI3L1,CITED2,COL1A2,COL2A1,CRABP2,CTH,CTSD,CYC1,CYP26A1,F2R,FGF2,FGFR1,GLTP,HK2,HMOX1,HSD17B1,IGFBP3,IGFBP4,LTBP3,Marcks,MET,MMP11,MMP14,MMP2,Mt1,NOX4,PDGFRB,PGK1,PROCR,PSIP1,PTGS1,RUNX2,SERPINE2,SGK1,SLC19A1,SLC25A4,SLC31A1,SOAT1,SOD2,SPP1,TGFB1,TGFBR2,TGM1,TIMP1,TIMP2,TNC,TP53,UGCG,UGDH,VDR	CREBBP,ESR1,FOXM1,MEF2C,MYOD1,NFkB (complex),NR4A3,RB1,SP1,TAF4,TP53,YBX1,estrogen receptor
PTHLH	0.477	other		0.297	0.289	0.000342	ADAMTS1,AR,BCL2,CCND1,COL2A1,CTSK,IBSP,LEF1,RUNX1,RUNX2,TGM1,TNC,TNFRSF11B,VDR
GNAQ	0.075	enzyme		0.438	0.424	0.000343	ADAMTS1,AK4,ARG1,BNIP3,CCN2,CCND1,CD44,CITED2,CTSV,GADD45A,GALE,HIGD1A,HK2,MAPK11,MMP16,NFIA,NPR3,PHLDA1,PLAT,SGK1,VCAM1
FLCN	0.017	other	Activated	2.4	2.413	0.000347	ATP5PO,Cox5b,COX7A1,Cox8b,CYCS,ELOVL3,Esrra,NDUFV2,PHOSPHO1	ESRRA,FLCN,PPARA,PPARGC1A,TFE3,TP53
MTOR	-0.282	kinase		-1.116	-1.126	0.000357	AR,ATP5PB,BCL2,BNIP3,CAB39L,CCND1,CEBPB,CITED2,CPT1B,CS,CTNND1,CYCS,DDIT4,GATA3,HK2,HSP90AB1,HSP90B1,IRAK1,IRS1,IRS2,KLK3,LDHA,MAP2,MB,NCAM1,NOX4,PDE4A,PDHA1,PFKP,PGP,PRDX5,PRKCZ,RPL12,RPS6,RUNX2,SERPINA1,SGCA,SLC12A2,SLC16A3,SLC2A4,SOAT1,TNFRSF11B,TP53,UQCRC2,VCAM1
FOXO4	-0.206	transcription regulator		0.816	0.816	0.00036	APLN,BNIP3,CAT,CCN2,CCND1,CERS4,COMP,EDNRB,ERG,GADD45A,NAMPT,NRP2,PRKAA2,PTGS1,RUNX2,S1PR3,SGK1,SOD2,TGFB1,VCAM1
uranyl nitrate		chemical toxicant		1.723	1.722	0.00036	ATP5MD,CA4,Calm1 (includes others),Cd24a,CST3,CYCS,EEF2,INMT,LAMP2,MGP,Mt2,NDUFB9,PDHA1,RACK1,RPL19,RPL9,RPS26,RPS8,SPP1,TNFAIP1
PRKAA1	0.077	kinase		-0.377	-0.362	0.000362	ACOT7,ALB,ARG1,BAX,BCL2,CAT,DDAH1,EPHA3,Foxp2,HIGD1A,IGFBP4,LDHA,LITAF,Ly6a (includes others),MAP2,MATN2,MMP16,PMEPA1,PRKAA2,SOD2,TGM2,TP53,TTYH1,VCAM1
leuprolide		biologic drug		0.277	0.273	0.000366	APP,BAX,BCL2,MMP14,MMP2,TGFB1,TIMP1
ITGB1	0.014	transmembrane receptor		0.026	0.022	0.000369	BCAN,BCL2,BMPR1B,CDH2,COL1A2,COL4A4,FGF1,GDF5,HSPG2,LOXL1,LTBP3,MATN2,MMP2,MMP24,ROBO1,SNAI1,SPON1,TGFB1,TGM2,TIMP2,TNXB,TP53
NKX3-1		transcription regulator				0.000374	AR,CTSV,CTSZ,ERG,IGFBP3,KLK3,PF4,PIK3R1,PTP4A2,RUNX1,SDC4,SOAT1,Vnn3
ACOX1	-0.011	enzyme		-1.54	-1.534	0.000374	ACADVL,ADAMTS1,AIG1,CAT,CPOX,CTSV,CYP26A1,DPP4,ELOVL3,GADD45A,GNMT,LCN2,LY6D,MYH1,PHLDA1,RPL12,SERPINA1,SGK1,SLC20A1,SLC37A4,TP53,TRIB3,UCP2,UGCG,Vnn3	ACOX1,PPARA
deoxycorticosterone acetate		chemical drug	Activated	2.762	2.752	0.000379	ATP6AP2,SLC14A2,SLC2A4,SLC9A1,SPP1,TGFB1,TNC,VCAM1
p70 S6k		group		0	-0.005	0.000379	BAX,CCND1,CDH2,EEF1A1,EEF2,NOX4,RUNX2,SNAI1
CD38	-0.165	enzyme	Inhibited	-2.788	-2.819	0.000384	ALDOA,ASS1,BNIP3,CD44,CISH,CITED2,CLCN3,ELL2,FAM162A,FGL2,GADD45G,GCAT,HIGD1A,KCNAB2,KLHDC2,LRRC8C,NCAM1,PFKL,PFKP,PGM1,PSAT1,SCEL,SLC16A3,TGFB1,TPI1,VCAM1
raloxifene		chemical drug		1.313	1.313	0.000384	ACVRL1,ADCY9,BCL2,CBX6,CCND1,DDIT4,ENPP2,EPHA1,F2R,HMOX1,IGFBP4,LITAF,LUM,MAPK14,MATN2,MB,MFAP5,MMP2,PPP1R3C,PVALB,SLIT2,SPP1,TFRC,TGFBR2,TIMP1,TNFRSF11B
PCGEM1		other		-1.87	-1.886	0.000394	ALDOA,CS,GAPDH,HK2,LDHA,PDHA1,PGAM2,PGK1,PGLS,SUCLG1
tazemetostat		chemical drug		0.872	0.884	0.0004	ADAMTS1,AR,BCL2L2,CCND1,CDH2,CRABP2,CYP26A1,DDX3X,DSG2,EFNA3,EHMT2,EPHA3,EPHB3,FGF2,FGFR1,FLRT3,ID1,IRAK1,LEF1,LTBP1,MAP2,MET,MOB2,NCAM1,OLFM1,PITPNA,PLXNA3,PSAT1,RCC2,RET,ROBO1,SDC2,SGK1,SLC38A1,SMYD2,SOX12,SPP1,STC2,TNC,TP53,UCHL1
NOTCH1	-0.167	transcription regulator		0.589	0.585	0.000413	ASCL1,BCL2,CCN2,CCND1,CD44,CEBPB,CKM,COL1A2,DLD,ESM1,FCGR2A,FGF2,GAA,GATA3,GRN,HMOX1,HSP90AB1,ID1,IGFBP3,IGFBP4,LEF1,Ly6a (includes others),LYVE1,MMP2,NDUFS1,NDUFV2,PDGFRB,PDIA3,RUNX2,SNAI1,SPP1,TGFB1,TGFBR2,TP53,TP63,WASF1
plicamycin		chemical drug		0.406	0.417	0.000414	CA9,CCN2,COL1A2,GLTP,HMOX1,ID1,IER5,IGFBP4,MAPK11,Marcks,MET,OLFM1,PPP1R1B,RASL11B,SERPINE2,SLC40A1,TGFBR2,TIMP1,TP53,VDR
ciprofloxacin		chemical drug		1.886	1.885	0.000432	APP,ATP5F1A,ATP6V1A,CD47,CTSA,CTSD,CTSV,EDIL3,GRN,GUSB,MAN2B2,MMP2,PKN2,Plpp1,RPL12,Rpl34 (includes others),SEMA4D,SPP1,SRPRA
IL10RA	0.345	transmembrane receptor	Activated	2.186	2.184	0.000435	ANO1,ASPN,ASS1,BAX,BCL2,BNIP3,Cd24a,CERS4,CLEC4M,COL14A1,CTH,CYFIP2,CYP2F1,DDIT4,EDNRB,F13A1,FBN1,FSTL1,GBP6,GNE,Iigp1,KLK3,LCN2,LRIG3,LUM,Ly6a (includes others),NAMPT,OGN,PAM,PF4,Pla2g2a,PLAAT3,POSTN,PROCR,SERPINB6,SLC16A3,SORBS2,SPON1,TAC1,TGFB1,TGM2,Tgtp1/Tgtp2,THBS4,WWP1
PAX7	-0.2	transcription regulator		-0.264	-0.287	0.000439	ASS1,C1QTNF3,Cd24a,CDH11,CDH2,CNTFR,ID3,Marcks,MEI4,MYO1D,OLFM1,PARM1,Plpp1,RNF128,TOB1
cadmium		chemical toxicant		1.661	1.649	0.000439	ALB,BAX,CCND1,CYP26A1,CYP26B1,DLD,HMOX1,MGP,Mt1,Mt2,RBP1,SERPINF1,SGK1,TIMP1,TP53	Akt,CREBBP,ESR1,FOXM1,NFkB (complex),P38 MAPK,PPARGC1A,RB1,RUNX2,SP1,TAF4,TP53,YBX1,cadmium,estrogen receptor
Pln	-0.359	other				0.000459	AK1,ALDOA,FABP3,HSP90B1,KCNJ12,PGAM2,PGK1,RAB10,RAB1A,RAB21,RACK1,RAP1A,TPI1
ladostigil		chemical drug		-1.954	-1.954	0.000471	APP,BAX,BCL2,BCL2L2,PIK3R1,TFRC
manganese		chemical - endogenous mammalian		-1.455	-1.461	0.000471	GAPDH,GOLIM4,HSP90B1,SLC1A2,SLC40A1,SOD2
Cdk		group		0.816	0.8	0.000472	DDIT4,Esrra,GADD45A,GADD45G,IDH3A,NEDD9,PHLDA1,PLEKHF1,UCP2
indican		chemical - endogenous mammalian		1.01	1.009	0.000472	ALB,BNIP3,CA9,CITED2,GATA3,HMOX1,KL,NOX4,TP53
rasagiline		chemical drug		-0.578	-0.588	0.000472	APP,BAX,BCL2,BCL2L2,CAT,Marcks,PIK3R1,RACK1,TFRC
BMP7	1.007	growth factor		0.313	0.298	0.000478	ACVR1,ATP5F1A,CD44,CDH2,CEBPB,COL1A2,COX7A1,CYCS,DSC2,Esrra,GREM1,IBSP,ID1,IGFBP3,IGFBP4,IGFBP5,IRS1,MMP2,NCAM1,PDGFRB,PIK3R1,RUNX2,SLC2A4,SPP1,TGFB1,TIMP1
cyclosporin A		biologic drug		-0.242	-0.227	0.000483	ABLIM1,ACPP,AGTR2,ALAS1,ANXA1,APP,AQP2,BAX,BCL2,BGN,CASR,CCN2,CCND1,CD163,CD44,CDH11,CLCN1,DDIT4,EDIL3,EDNRB,EGR2,ELL2,FCGR2A,FLT3LG,FXYD5,HMOX1,ID3,IQGAP2,KL,LCN2,LYVE1,MAF,MMP14,MMP2,MYH4,NDUFB6,PAM,POSTN,RUNX1,RUNX2,SLC14A2,SLC8A3,SMTN,SOX12,SPP1,SYT7,TGFB1,TGIF1,TIMP1,TP53,Tpm1,TSPAN8,VCAM1
testosterone		chemical - endogenous mammalian		-1.518	-1.536	0.000486	ABCC9,Actn3,ALDOA,AMD1,AMHR2,ANPEP,ANXA1,APLN,AR,ATP5PB,BAX,BCL2,BGN,CAT,CCND1,CDH2,CLCN3,CTSV,CYP26B1,DDIT4,FGF7,FGFR1,GADD45A,GUSB,HSD17B1,HSP90AB1,ID1,ID3,IGFBP3,IGFBP5,IL33,IRS1,IRS2,KLK3,Mt1,PDIA4,PIK3R1,PRKCZ,SLC9A1,SOD2,SSTR3,SYT11,TGFBR2,TNFRSF11B,VCAM1,VIPR1	NFkB (complex),PIK3R1,PPARA,SP1,TP53,estrogen receptor,palmitic acid,testosterone
ACE	-0.352	peptidase				0.0005	ACE,CCN2,LDHA,MDK,TAC1
CNBP	-0.11	transcription regulator				0.0005	AK1,DUSP3,PABPC1,RPS6,TNNT3
HTR2B	-0.16	g-protein coupled receptor				0.0005	BAX,CDH2,GRN,SLC25A4,TGFB1
OLR1	1.082	transmembrane receptor		0.606	0.597	0.000514	ACE,CCN2,NOX4,RBP1,RXRG,SPP1,STRA6,TGFB1,TGFBR2,VCAM1
BMP4	0.164	growth factor		1.423	1.405	0.000524	ASCL1,BCL2,CCND1,CCNG1,CEBPB,COCH,COL2A1,DEPP1,DIO2,GATA3,GREM1,HTRA1,IBSP,ID1,ID3,LEF1,MFAP5,MMP14,NCAM1,POSTN,PRR5,RET,RUNX2,SLC40A1,SNAI1,TFAP2A,TGM2,TNFRSF11B,TP53,TP63
androgen		chemical drug		1.752	1.753	0.000525	AR,BCL2,BMP6,CALR,CCND1,CD44,COL12A1,CTSV,CTSZ,FGF2,FGF7,GNMT,IGFBP5,KLK3,Mt1,PF4,PIK3R1,PTP4A2,RET,RUNX1,RUNX2,SDC4,SOAT1,Vnn3,WIF1
NEDD9	0.389	other		-0.258	-0.257	0.000531	2610028H24Rik,APP,BMPR1B,BNIP3,CA9,CD44,DDIT4,DUSP26,LRP1,MAL2,MMP14,MMP2,PFKP,PGK1,TPPP3,TUBA1A
dexamethasone phosphate		chemical drug		0.788	0.783	0.000536	DDIT4,GADD45G,ID3,LYVE1,Mt1,PLEKHF1,SGK1,TNFRSF11B
PDGFC	0.015	growth factor		0.743	0.727	0.000553	CCND1,COL1A2,FGF2,PDGFRB,TGFB1,TIMP1,TIMP2
losartan potassium		chemical drug	Inhibited	-2.497	-2.481	0.000571	ACE,AGTR2,ALB,AQP2,BAX,CCN2,CST3,KL,MAP2,MMP2,NOX4,POSTN,RBP4,SPP1,TGFB1,TGFBR2,TIMP1,UCP2,VCAM1	Akt,ESR1,NFkB (complex),P38 MAPK,PI3K (complex),PPARGC1A,RUNX2,SMAD7,SP1,TGFB1,TP53,Tgf beta,estrogen receptor,losartan potassium
epigallocatechin-gallate		chemical drug		0.843	0.852	0.000576	APP,AQP4,AR,BAX,BCL2,BCL2L2,CACNB3,CAT,CCN2,CCND1,CEBPB,CTSK,GADD45A,GCLC,HMOX1,KLK3,MMP2,PDGFRB,PDIA4,RBP4,SEMA4D,SLC2A4,SNAI1,TAC1,TFRC,TGFB1,TIMP1,TIMP2,TP53,VCAM1
ADAM10	-0.148	peptidase		1.095	1.089	0.000596	APP,ATP6V0A4,CACNA2D1,CAMK2A,CCND1,CDH2,DCLK1,GADD45G,GRIN2A,HIPK1,IRAK1,MCHR1,MET,OMP,PDIA3,PPP1R13L,PVALB,TGFB1
RHO		g-protein coupled receptor		-1.069	-1.074	0.000599	APP,Cbr2,CD44,CEBPB,COL1A2,CRABP1,EPB41,HK2,KCNA1,KCNB1,Mt1,NCAM1,PRPH,SGK1
gentamicin		chemical drug		1.838	1.828	0.000599	AQP2,BAX,CA4,CALR,CCNG1,CEBPB,CTSD,CTSV,DPP4,EEF1A1,ENPP2,ETFDH,GADD45A,HIVEP2,HMOX1,HSP90B1,IGFBP3,L3HYPDH,LCN2,LITAF,MAF,MCM6,NPM1,PDIA4,PHGDH,PSAT1,RBP4,SLC6A19,SPP1,TFRC,TGFB1,TIMP1,TP53,VAT1,VCAM1	NFkB (complex),P38 MAPK,RUNX2,SP1,TP53,estrogen receptor,gentamicin
IL17A		cytokine		0.255	0.23	0.000604	BCL2,CCN2,CCND1,CD163,CDH2,CEBPB,COL2A1,CTSK,EDIL3,EGR2,FGF2,GADD45A,GUSB,HEXB,IL33,LCN2,LIF,MAPK14,METRNL,MMP2,PTGFR,S100A8,SGK1,SPSB1,TGFBR2,Tgtp1/Tgtp2,TIMP1,TIMP2,TNC,TNFRSF11B,TP63,VCAM1
GSK2816126		chemical drug		1.155	1.142	0.000613	CDH2,CNMD,COL9A1,FRZB,HIVEP3,HOXD8,IBSP,RBP4,RUNX2,SNAI1,SPP1,WIF1
salirasib		chemical drug	Activated	2.309	2.327	0.000613	AK4,BNIP3,CA9,CITED2,LDHA,PDGFRB,PGAM1,PGK1,PGM1,PLAT,TGM2,TPI1
FGF8		growth factor		0.923	0.914	0.000614	CCND1,CITED4,CYCS,ELL2,FGFR1,LHX8,MDK,PCOLCE2,RTKN2,RUNX2,SLC27A3,SLPI,SPP1,TNFRSF11B,TNXB,TRIP6,VDR
PSMB11		peptidase		-0.512	-0.488	0.000617	Abi3bp,Actn3,BMPR1B,CCND1,CD28,CHAD,COL1A2,CTSV,GADD45A,HMOX1,LIFR,MAPK11,NCAM1,OLFML2B,PIK3R5,PRKCZ,RELT,ROBO2,THBS3,VIT
RRP1B	0.159	transcription regulator				0.000617	ADCY7,ASCL1,CCND1,CCNG1,CEBPB,GADD45A,HSP90AB1,MCM6,PRKD1,RPL19,RPS10,RPS19,RPS26,RPS5,RPS8,RPS9,SERPINE2,SPP1,TGFB1,VDR
zinc		chemical drug		1.647	1.65	0.000619	BAX,BEX3,CAT,CCK,CCND1,HMOX1,MGP,Mt1,NDUFB8,NPM1,PDE4A,SLC39A7,TFRC,TGM2,TP53	AHR,ERK,ESR1,NFkB (complex),P38 MAPK,PARP1,PPARGC1A,RUNX2,SP1,TP53,estrogen receptor,reactive oxygen species,zinc
PI3K (complex)		complex	Activated	2.34	2.314	0.000625	APLN,BCL2,CCN2,CCND1,CD44,CDH2,CEBPB,CTSD,DDIT4,FBLN5,GATA3,GCLC,H19,HK2,HMOX1,IL33,LCN2,LEF1,LTBP2,MAP2,MMP14,MMP2,NOX4,PLA2G5,POSTN,PPP1R1B,PRKCZ,RPS6,SGK1,SLC9A1,SNAI1,SOAT1,SPP1,TGM2,TP53,TP63,UGCG,VCAM1	Akt,CREBBP,ERK,ESR1,IKBKB,NFkB (complex),P38 MAPK,PI3K (complex),PPARGC1A,RB1,RUNX2,SP1,TAF4,TP53,estrogen receptor
bexarotene		chemical drug		-0.264	-0.278	0.000643	APP,BCL2,BMP6,CCK,CCND1,Cox5b,CRABP1,CST3,CTH,CYCS,CYP26A1,DDIT4,DEPP1,ID1,LRP4,MAF,MPC2,NDUFB2,NDUFB8,NRP2,PIK3R1,PLAT,RET,RHBDL1,TGFB1,TGM2,TSC22D3,UAP1,VCAM1
dimethylnitrosamine		chemical toxicant		-0.243	-0.256	0.000652	Calm1 (includes others),COL1A2,HMOX1,IGFBP5,Mt1,Mt2,PRKCZ,SOD2,TGFB1,TGM2,TIMP1
AKT1	0.178	kinase		-0.597	-0.612	0.000675	ACTC1,AR,ASS1,ATP5MC3,BAX,BCL2,CCND1,CD44,CISH,CST3,CTSV,FGF2,FSTL1,FXYD5,GCK,GCLC,HMOX1,IGFBP5,IRS1,IRS2,LCN2,MMP14,MMP2,MYL1,NOX4,PDGFRB,PHLDA1,PIK3R1,PPP1R1B,PTGS1,SERPINF1,SHOX2,SLC3A2,SNAI1,SPP1,TIMP1,TP53,TP63
Sn50 peptide		chemical toxicant		-0.48	-0.463	0.000678	BAX,BCL2,BCL2L2,CCN2,HMOX1,KCNC4,LIPG,MMP2,RACK1,SLC1A2,SNAI1,TP53,VCAM1
CGA		other		-1.066	-1.065	0.000686	ADAMTS1,AR,BAX,CCND1,CTSV,EGR2,HSP90B1,ID1,MMP14,MMP2,PARM1,PDIA3,PDIA4,SFRP4,SGK1,SPOP,TIMP2,ZCCHC12
BCLAF1	0.015	transcription regulator				0.00069	CCND1,GRN,TP53
CCNL2	0.2	other				0.00069	BAX,BCL2,TP53
LAPTM4B	-0.2	other				0.00069	BAX,BCL2,TGFB1
MCU	-0.106	ion channel				0.00069	ATP5F1A,NDUFA9,UQCRC2
TRDN	-0.545	other				0.00069	ASPH,CASQ1,JPH1
methylamphotericin B		chemical drug				0.00069	LCN2,SPP1,TIMP1
natamycin		chemical drug				0.00069	LCN2,SPP1,TIMP1
actinomycin D		biologic drug		-0.725	-0.706	0.000699	ALB,APP,AQP5,AR,ASS1,BAX,BCL2,CCK,CCN2,CCND1,CD28,CDH2,COL1A2,COL2A1,FGFR1,GADD45A,GAPDH,HMOX1,IGFBP4,IGFBP5,IRS1,IRS2,MMP2,Mt1,NPM1,PTX3,SLC20A1,SLC40A1,SPP1,TGFB1,TNFAIP2,TP53,VDR
ERG	0.694	transcription regulator		1.222	1.197	0.000707	ALOX12,AR,ARHGAP20,ARHGAP31,ARHGEF2,CD164,CDH2,DYNC1I1,EPB41L3,ERG,EXT1,F2R,KLK3,LEF1,MET,MYO1D,PLAT,PLPP3,RCAN2,RGS3,RHOJ,RPL27A,SLIT2,SNAI1,SPP1,TGFBR2,Tpm1,TSC22D3,WASF3
melatonin		chemical - endogenous mammalian		-0.139	-0.139	0.000712	AR,BAX,BCL2,CYCS,DIO2,HMOX1,IBSP,IRS1,IRS2,Mt1,NCAM1,PLAT,RUNX2,SLC2A4,SOD2,SPP1,TP53
SP2509		chemical reagent		0.872	0.883	0.000732	ADAMTS1,AR,BCL2L2,CCND1,CDH2,CRABP2,CYP26A1,DDX3X,DSG2,EFNA3,EHMT2,EPHA3,EPHB3,FGF2,FGFR1,FLRT3,ID1,IRAK1,LEF1,LTBP1,MAP2,MET,MOB2,NCAM1,OLFM1,PITPNA,PLXNA3,PSAT1,RCC2,RET,ROBO1,SDC2,SGK1,SLC38A1,SMYD2,SOX12,SPP1,STC2,TNC,TP53,UCHL1
Betacatenin/TCF		complex		1.408	1.392	0.000762	CCND1,CD44,FGF9,LEF1,RUNX2,TNFRSF11B
MK2206		chemical drug		1.632	1.632	0.000762	BAX,BCL2,CCND1,EDIL3,SNAI1,TP63	Akt,MK2206,NFkB (complex),PPARGC1A,RUNX2,SP1,TP53
N-ethyl-N-nitrosourea		chemical toxicant				0.000762	BAX,Mt1,Mt2,SERPINA1,SPP1,TGM2
STAT3	-0.006	transcription regulator		0.261	0.237	0.000771	ARG1,BCL2,CA9,CAT,CCDC88A,CCN2,CCND1,CD44,CDH2,CEBPB,CHI3L1,CLIC5,COL1A2,CYP26A1,DPP4,EGR2,ENPP2,FGF2,FGL2,FLRT3,FUT4,GADD45A,GADD45G,GATA3,GBP6,HK2,HMOX1,ID1,IGFBP5,KLK3,LDHA,LEPR,LIF,MAF,MAFB,MAP2,MMP2,Mt1,NAMPT,NPM1,NRP2,OMP,PDIA4,PEG10,PFKL,PGK1,PHLDA1,PROCR,PSIP1,RAB31,RET,RUNX1,SERPINA1,SERPINA3,SERPINE2,SGK1,SNAI1,SOD2,SOX6,STC2,TGFB1,Tgtp1/Tgtp2,TIMP1,TOB1,TP53,TRIM5
JUN	0.344	transcription regulator		0.424	0.403	0.000782	ADH7,ALAS1,ALOX12,ANXA1,APP,AR,ARG1,ARTN,BAX,CCN2,CCND1,CD164,CD44,COL1A2,CYCS,DIO2,DUSP6,EEF2,FBLN5,FGF2,FRZB,GADD45A,GCLC,HK2,HMOX1,IBSP,IGFBP3,IGFBP4,IRS2,LAMP2,LIF,LMO1,LPAR1,LTBP1,MAF,MCF2L,MET,MMP2,MYLPF,NAMPT,NCAM1,POLI,PTX3,RAB31,RUNX2,SGK1,SLC19A1,SOD2,SPP1,TGFB1,TIMP1,TNC,TP53,Tpsab1,VCAM1,VDR
puromycin aminonucleoside		chemical reagent		1.156	1.141	0.000788	ADAMTS1,ALB,ANXA1,BAX,CAT,CD44,CLIC5,CTSV,FCGR2A,FXYD5,LCN2,NOX4,SOD2,SPP1,TGIF1,TIMP1,Tpm1,TSPAN8
CXCR1		g-protein coupled receptor				0.00079	APP,BAX,BCL2,CCND1
DIM-C-pPhOH-3,5-Br2		chemical reagent		-1.982	-1.996	0.00079	PGAM2,PHKG1,PYGM,SLC2A4
UDP-D-glucose		chemical - endogenous mammalian	Inhibited	-2	-1.987	0.00079	CALR,HSP90B1,PDIA3,PDIA4
triamcinolone acetonide		chemical drug		-1.273	-1.272	0.00079	ADCY7,ANGPTL7,BAX,BCL2,BMP6,CD44,COL13A1,CRYBG1,CSNK1G2,CTH,DCBLD2,ERG,FUT4,HIPK2,IGFBP3,IGFBP4,KCNB1,KCNJ12,MYOC,PF4,RASL11B,RUNX1,SERPINA3,SOAT1,SOD2,SPP1,STC2,TSC22D3
dipyridamole		chemical drug	Inhibited	-2.433	-2.424	0.00081	HMOX1,MMP2,SPP1,TGFB1,TIMP1,TIMP2,TP53
RAC2	0.134	enzyme				0.000813	ALDOA,ANXA1,BCL2,Cd24a,CDH2,EGR2,LDHA,Mcpt4,RUNX2,SLPI,Tpsab1
POU5F1		transcription regulator		-0.561	-0.575	0.000814	ACVR1,ALB,ASCL1,ASPRV1,BAX,BCL2,BCL2L2,BNIP3,CCND1,CDH2,CHST15,CITED1,CRABP2,CST6,CYP26A1,FRZB,FUT4,GADD45A,GADD45G,GCK,GRN,H19,ID3,IER5,IRS1,IRX3,LBX1,LOXL1,MAX,MMP2,NCAM1,NFATC4,PMEPA1,SERPINA1,SNAI1,SPP1,Tdh,TGFB1,TGM1,TNFRSF11B,TNFRSF19,TP53,WLS
TSC1	-0.068	other		-1.706	-1.708	0.000817	ATP6V1A,BAX,BCL2,CCN2,EGR2,HMOX1,IRS1,IRS2,NPM1,PDGFRB,RNF128,RPS6,TP53	Akt,ESR1,NFkB (complex),PI3K (complex),PPARGC1A,RUNX2,SP1,TP53,TSC1,estrogen receptor
HGF	0.233	growth factor		-0.358	-0.388	0.000821	ABCB4,ADAMTS1,AIMP2,ANGPT4,BCL2,CA9,CCN2,CCND1,CCNG1,CD28,CD44,CDC14A,CITED2,CNTFR,COL1A2,COL2A1,CTSK,DDX3X,DUSP6,ESM1,FAIM2,FAM3C,FGF7,GEM,HK2,HMOX1,ID1,IGFBP3,IGFBP4,LCN2,LDHA,LYVE1,MAPK14,MET,MMP14,MMP2,NAMPT,PGAM1,PGK1,PHLDA1,PLPP3,PTGS1,RUNX2,SGK1,SLC1A2,SLC20A1,SNAI1,SOD2,SPP1,TGFB1,TGFBR2,TIMP1,TNFAIP2,TP53,TP63,VCAM1,VDR
ABCB4	-0.527	transporter		-1.841	-1.825	0.000832	ABCB4,CCN2,COL1A2,H19,MMP2,PDGFRB,SPP1,TGFB1,TIMP1	ABCB4,NFkB (complex),RB1,SP1,TP53,doxorubicin
PRKCZ	-0.466	kinase		-1.137	-1.148	0.000832	BAX,BCL2,CCND1,COL1A2,HMOX1,MMP2,PHGDH,PSAT1,VCAM1
advanced glycation end-products		chemical - endogenous mammalian		1.4	1.394	0.000847	BAX,BCL2,CCN2,F2R,FGF2,ROBO1,SERPINF1,SLIT2,SPP1,VCAM1
KDM8	-0.56	enzyme		-1.811	-1.826	0.00085	ALDOA,CS,CTSK,ENO3,FBP2,GAPDH,HK2,ID1,IGFBP3,KLK3,LDHA,PDHA1,PGAM2,PGLS
diethylnitrosamine		chemical toxicant		-0.171	-0.172	0.000851	ALB,CCND1,COL1A2,CYP26A1,DCLK1,ELOVL3,HMOX1,LCN2,LY6D,Mt1,Mt2,MYH1,PHLDA1,SLC37A4,TGFB1,TIMP1,TIMP2,TP53,Vnn3
EGR1	0.156	transcription regulator		0.823	0.801	0.000869	ACE,APP,AR,BAX,CCND1,CD44,COL1A2,COL2A1,EGR2,FGF2,GADD45A,GALNT3,HMOX1,MMP14,PEG10,PF4,SGK1,SLC12A2,SNAI1,SOD2,SPP1,SYN1,TGFB1,TGFBR2,TIMP1,TP53,UFSP1,VCAM1
MAPK14	-0.321	kinase		1.1	1.082	0.000869	BAX,BCL2,CALR,CAT,CCND1,CKM,DAB2,DUSP6,GADD45A,GREM1,HMOX1,LEF1,MAP2K6,MAPK11,MAPK14,PLA2G5,SGK1,SOD2,SPP1,TGFB1,TGM2,TIMP1,TIMP2,TP53,Tpm1,VCAM1,VDR,WIF1
IL15	-0.253	cytokine		-1.318	-1.34	0.000905	ALDOA,ANXA1,BCL2,BPGM,CCN2,CCND1,CD28,CD44,CEBPB,CISH,DDT,DPP4,DPYSL5,EGR2,ENO3,FLT3LG,GABARAPL2,GAPDH,GATA3,GPD2,HK2,HMOX1,LDHA,LEF1,LIF,MAF,MYH1,NAGA,NCAM1,OGN,PDIA3,PDIA4,PFKL,PFKP,PGAM2,PGK1,PGM1,PIK3R1,PIK3R2,PTP4A2,RPS6,SLC16A3,TFRC,TGFBR2,TIMP1,TNNI2,TPI1,TRIM5,VCAM1,VDR
DANCR		other		-1.555	-1.549	0.000927	CDH2,RAB1A,RUNX2,SNAI1,TIMP2
NDP	0.171	growth factor		0.14	0.132	0.000927	FGF2,LIF,Mt1,PSIP1,SERPINF1
shikonin		chemical drug				0.000927	AR,BAX,CAT,TIMP1,TP53
zeaxanthin		chemical drug		0.447	0.456	0.000927	DLAT,HTATIP2,MMP2,PRKAA2,TIMP1
TSC2	-0.183	other		-1.028	-1.014	0.000939	ANXA1,ATP6AP2,ATP6V1A,BAX,CCND1,CST6,DPP7,DYNC1I1,HK2,HMOX1,IGFBP5,IRS1,IRS2,LOC728392,MGP,Mt1,PDGFRB,PVALB,SCPEP1,SOD2,UCP2
Hbb-b1		transporter	Inhibited	-3.01	-3.031	0.000949	ATP5PO,CD44,CYC1,Mt1,NDUFA5,NDUFA9,NDUFB8,NDUFB9,NDUFS3,NDUFS4,NDUFV2,RET,TFRC,UCP2,UQCRC1,UQCRC2,VCAM1
Lh		complex		1.744	1.734	0.000978	ACPP,ADAMTS1,ADCY7,ADCY9,AR,CDK14,CDK5,CTNND1,CYFIP2,DAB2,DUSP3,GEM,HK2,HSD17B1,MAPK14,MMP2,PGK1,PLAT,PRKD1,PSIP1,PTGS1,PTX3,RAB1A,RAB31,RUNX1,RUNX2,SFRP4,SGK1,SLIT2,SOD2,TNFRSF11B,TP53,TUBA1A	Akt,Lh,NFkB (complex),PPARGC1A,RUNX2,SP1,TP53
LEP	-0.303	growth factor		-0.471	-0.487	0.000994	ACADVL,ACAT1,ACE,APP,AR,ASS1,ATP5F1A,ATP5PB,BAX,BCL2,CCK,CCND1,CEBPB,COL2A1,CPT1B,CTSV,CYP2F1,DUSP6,EGR2,ETFDH,FABP3,FBP2,FGFR1,GADD45A,GAL,GAPDH,GCK,GCLC,IBSP,IGFBP3,IRS1,IRS2,KCNB1,LEPR,LIF,LIFR,MCHR1,MMP14,MMP2,NAMPT,PLAT,PRKAA2,RUNX2,SLC2A4,SOD2,SPP1,SYN1,TGFB1,Tgtp1/Tgtp2,TIMP1,TNFRSF11B,TP53,UCP2,UTS2R,VCAM1
tetradecanoylphorbol acetate		chemical drug		1.919	1.887	0.000997	ACE,ADAMTS1,AHCTF1,ALAS1,ALB,ALOX12,ANXA1,APP,APRT,AQP4,ARG1,ASCL1,BAX,BCL2,BMP6,CA11,CAT,CCN2,CCND1,CD163,CD276,CD28,CD44,CKM,CTSD,CTSV,DAB2,DDIT4,DGLUCY,DIO2,DUSP6,DYNC1I1,EEF1D,EGR2,EIF4EBP2,FBN1,FGF2,FGF7,FZD1,GAL,GATA3,GCLC,GEM,GPHA2,GRIN2A,H1-10,H19,HIVEP3,HJURP,HSD17B1,HSP90AB1,IBSP,ID1,ID3,IGFBP3,IGFBP5,IRAK1,KCNN4,KLK3,LCN2,LEPR,LIF,LIPG,LYVE1,MAD1L1,MAF,MMP11,MMP14,MMP2,MYH1,MYL1,MYLPF,…	CREBBP,ESR1,NFkB (complex),P38 MAPK,PI3K (complex),RB1,RUNX2,SMAD7,SP1,TAF4,TGFB1,TP53,Tgf beta,estrogen receptor,tetradecanoylphorbol acetate
captopril		chemical drug		-0.981	-0.986	0.00101	ACE,ANXA1,BGN,CD44,FCGR2A,HMOX1,LCN2,LTBP2,POSTN,SPP1,TGFB1,THBS4,TIMP1,Tpm1,TSPAN8
candesartan		chemical drug		0.362	0.378	0.00101	ACE,AGTR2,AQP2,COL1A2,GFPT1,MMP14,MMP2,NPR3,PDGFRB,SPP1,TGFB1
CR1L	-0.002	other	Inhibited	-2.137	-2.121	0.00101	BGN,CCN2,COL1A2,FBN1,LUM,MGP,TGFB1,TNC
TRIB3	0.79	kinase	Inhibited	-2.13	-2.122	0.00101	CTH,DDIT4,ID1,JAK1,PSAT1,RUNX2,STC2,TRIB3	ATF4,TRIB3
VEGFA	-0.293	growth factor		-0.159	-0.189	0.00101	ACE,ADAMTS1,AK4,ALAS1,ANPEP,ATP5MC3,ATP5PO,BAX,BCL2,CCN2,CCND1,CITED2,CST3,CTSV,ESM1,FGF2,FGFR1,HMOX1,HSD17B1,ID1,ID3,IGFBP4,IGFBP5,MMP2,MVP,PDGFRB,PLAT,PLPP3,PTGS1,RUNX1,RUNX2,SMTN,SOD2,SYNM,TGFB1,TIMP1,TNC,TP53,VCAM1
dimethyl sulfoxide		chemical drug		-0.446	-0.463	0.00105	ANXA1,BNIP3,C1QTNF3,CALR,CEBPB,EIF4EBP2,FRZB,HMOX1,HSP90AB1,IBSP,IRS2,LCN2,LIFR,PTGS1,RUNX2,SLC8A3,TFRC,TNFRSF11B,Tpm1,VCAM1,WIF1
HBEGF	0.412	growth factor		-1.53	-1.543	0.00107	ALDOA,AR,BCL2,CCND1,FGF2,HK2,IGFBP3,LDHA,MAPK14,SLC16A3	Akt,HBEGF,NFkB (complex),PPARGC1A,RUNX2,SP1,TP53
monocrotaline		chemical toxicant		1.937	1.933	0.00107	CCND1,GADD45A,HMOX1,HSP90AB1,ID1,ID3,MMP2,NCAM1,SLC9A1,SPP1	NFkB (complex),P38 MAPK,RUNX2,SP1,TP53,estrogen receptor,monocrotaline
tempol		chemical drug	Inhibited	-2.345	-2.335	0.00108	CAT,CYCS,SGK1,SOD2,SPP1,TGFB1,TP53,UCP2,VCAM1	AHR,Akt,ESR1,NFkB (complex),P38 MAPK,PI3K (complex),PPARA,PPARGC1A,RUNX2,SP1,TP53,estrogen receptor,palmitic acid,tempol
zoledronic acid		chemical drug		-0.67	-0.664	0.00108	BCL2,CTSK,LPAR1,MMP2,NCAM1,NOX4,RUNX2,TNFRSF11B,TP53
BMP6	0.356	growth factor		0.153	0.143	0.00109	ADAMTS1,AQP5,CCN2,CD44,HMOX1,IBSP,ID1,ID3,MATN2,PCOLCE2,PMEPA1,PRKD1,SCEL,SLC20A1,SNAI1,Tgtp1/Tgtp2,TIMP1
EOMES		transcription regulator		-1.63	-1.63	0.0011	ACTC1,ANXA1,CCK,CRABP1,CYP26A1,DNAJC15,FREM1,FRZB,H19,IGFBP3,MAP2K6,MEOX1,NRP2,NXPH4,PDPN,ROBO2,TBX6,ZCCHC12,ZNF521
luteolin		chemical drug		0.647	0.659	0.00111	AR,BAX,BCL2,CCND1,CDK5,GCLC,HMOX1,IRS1,MMP2,PPP1R13L,SOD2,TP53
CD44	0.358	other	Activated	2.166	2.147	0.00112	ANXA11,BCL2,BGN,CALR,CCND1,CCNG1,CD44,CRABP2,CTSK,EMILIN1,GADD45A,HSP90AB1,ITGBL1,LTBP1,LTBP2,Ly6a (includes others),LY6D,MET,MMP14,MMP2,MTCH1,NOX4,PLPP3,PMEPA1,PTP4A3,SDC4,SERPINA1,SPP1,VCAM1	Akt,CD44,ERK,ESR1,NFkB (complex),P38 MAPK,PI3K (complex),PPARGC1A,RUNX2,SMAD7,SP1,TGFB1,TP53,estrogen receptor
EHF	1.334	transcription regulator		-0.231	-0.237	0.00114	ANPEP,CCBE1,COL2A1,CRABP2,GLB1,HMOX1,KLK3,MET,NOTCH2,PLAT,S100A8,SCEL,SERPINA3,TGFB1,TIMP1,TNC
amphetamine		chemical drug		1.245	1.235	0.00114	BAX,BCL2,CAMK2A,CD47,CDH2,CYP2F1,FAP,HIVEP3,MYOM1,RGS3,RGS9,SGK1,TAC1,TGFBR2,TP53,UCHL1
ITGA9	0.02	other		1.746	1.73	0.00115	CDH11,CDH2,CXCL14,MMP14,SNAI1,TGFB1,TNC	CDH1,ITGA9,NFkB (complex)
bucladesine		chemical toxicant		1.203	1.18	0.00115	ADAMTS1,ANXA1,AR,ASS1,BCL2,Cbarp,CCND1,Cd24a,CD44,CDH2,CEBPB,CITED4,DIO2,DUSP6,EGR2,ENPP1,ESM1,FCGR2A,FGFR1,GCK,GEM,GLS2,H19,HMOX1,IBSP,ID1,IGFBP3,IGFBP5,IRS2,KCNAB2,LIF,MMP14,MMP2,Mt1,NCAM1,PTGS1,RET,SLC1A2,SLC2A4,ST8SIA5,TGFB1,TIMP1,TIMP2,VDR
nelfinavir		chemical drug	Activated	3.352	3.333	0.00117	ACPP,ADM2,ARHGEF2,CA6,CTH,HHIPL1,HMOX1,JDP2,NNMT,PSAT1,STC2,TGM1,TNFRSF11B,TRIB3,TSC22D3
EPHA2	-0.146	kinase		0.896	0.895	0.00118	BAX,BCL2,FGF2,GRN,SLIT2,VCAM1
isoliquiritigenin		chemical - endogenous non-mammalian		-0.555	-0.543	0.00118	BAX,BCL2,CCN2,MMP2,SERPINF1,TGFBR2
probucol		chemical drug		-0.555	-0.55	0.00118	BCL2,CCN2,HMOX1,TGFB1,TP53,VCAM1
nicotine		chemical drug		-0.039	-0.053	0.00119	AGTR2,ALDOA,BCL2,CACNA2D1,CCN2,CCND1,CD44,CTSK,FGF2,GATA3,GRIN2A,HMOX1,ID1,JAK1,KCNB1,LITAF,MMP2,PLAT,POSTN,PTGER2,RPSA,SERPINF1,SLC20A1,SPP1,TGM1,TP53
F2		peptidase		0.011	-0.023	0.00119	BAX,CALR,CCN2,CCND1,CD44,CITED4,DKK3,EDNRB,ELL2,EPB41,ERP29,ESM1,F2R,FGF2,GREM1,HMOX1,HOXD10,IGFBP4,IGFBP5,LAMP2,MEOX1,MMP2,PDIA4,PLAT,PPIF,PROCR,RGS3,RHOJ,SDC4,SLIT2,SMTN,SOD2,TIMP2,VCAM1
ITGA5	0.013	transmembrane receptor		0.872	0.858	0.00124	BCL2,CCND1,CD44,CDH2,CEBPB,COL2A1,ENPP2,GDF5,MMP14,MMP2,TGFBR2
methotrexate		chemical drug		0.589	0.583	0.0013	ACADVL,AK4,ALB,ALDOA,ALOX12,AMD1,ASS1,CCND1,CCNG1,CD28,CTSV,CYCS,DLAT,ENO3,FADS1,FGF7,GAPDH,HMOX1,ID1,IGFBP3,IGFBP5,LRP1,MAP2K6,MAPK14,MET,Mt1,SPP1,TGFB1,TNFRSF11B,TOB1,TP53,VCAM1
F7		peptidase		1.216	1.204	0.00134	AR,CCN2,CCND1,EEF1A1,EEF2,GADD45A,LIF,MMP14,PTGER2,VCAM1
IKBKG	0.03	kinase		1.176	1.154	0.00134	AEBP1,BAX,CEBPB,CTSZ,DUSP6,ENPP2,GM2A,GRN,HK2,KCNH2,LCN2,LIFR,MGP,Mt1,Mt2,NAGLU,OGN,PLD3,PTX3,SERPINE2,SGK1,TNFAIP2
NKX2-2-AS1		other	Inhibited	-2.828	-2.847	0.00134	AK4,Akr1b10,CHCHD10,COX7A1,Cox8b,FAM162A,MRPS23,RMDN1
SENP1	0.009	peptidase		0.164	0.155	0.00134	ARG1,Cox5b,CTSD,CYCS,IDH3A,MMP2,S100A8,UCP2
apomorphine		chemical drug	Inhibited	-2.116	-2.119	0.00134	BAX,BCL2,BCL2L2,CACNB3,FGF2,OXT,PDIA4,TAC1
mir-22		microrna		0.431	0.45	0.00134	ARRB1,BMP6,BMPR1B,FRAT2,HK2,LEF1,MAPK14,TGFBR2
propofol		chemical drug		0.956	0.966	0.00139	ANXA1,AQP4,BAX,BCL2,HMOX1,MMP2,PF4,SOD2,TP53
streptozocin		chemical drug		1.99	1.984	0.00147	ALB,APLN,AQP2,AR,ATP1B2,BAX,BCL2,CASR,CAT,CCN2,COL12A1,CPT1B,FABP3,FBN1,GCK,GREM1,HMOX1,HSPG2,IRS1,IRS2,MMP2,NOX4,OXT,RUNX2,SLC14A2,SLC1A2,SLC25A19,SLC2A4,SOD2,SPP1,TGFB1	AHR,Akt,CREBBP,ESR1,MAPK8,NFkB (complex),PPARGC1A,RB1,RUNX2,SMAD7,SP1,TAF4,TGFB1,TP53,estrogen receptor,streptozocin
SFRP1	0.063	transmembrane receptor		0.608	0.615	0.00151	APP,BAX,CCND1,GATA3,MMP2,NAMPT,RUNX2,SDC2,SLC2A4,TP53,TTYH1
KLF4	-0.245	transcription regulator		0.317	0.295	0.00155	ACTC1,ACVR1,ADAMTS1,ALB,ARG1,ASCL1,ASPRV1,BAX,CCND1,CD44,CHST15,CITED1,CRABP2,CST6,CYP26A1,FRZB,IBSP,ID3,IER5,IRS1,IRX3,MSI2,PFKP,PLAT,SERPINA1,SLPI,SOD2,TGFB1,TGM1,TNC,TNFRSF19,TP53,UGDH,VCAM1,WLS
BEX2		other		-0.555	-0.551	0.00158	BCL2,CDH2,MAP2,MMP2,SPP1
COX4I1	-0.264	enzyme		-0.44	-0.425	0.00158	MMP16,POSTN,SLC24A3,SLC2A4,TSPAN8
Fe2+		chemical - endogenous mammalian		1.342	1.346	0.00158	APP,BMP6,GCLC,HMOX1,TFRC
gallic acid		chemical - endogenous non-mammalian		-1.387	-1.375	0.00158	BAX,MMP2,PLAT,TP53,VCAM1
EZH2	0.111	transcription regulator		-1.068	-1.063	0.00159	BCL2,BMPR1B,CA6,CCND1,CDH2,CLEC3B,COL1A2,CRISPLD2,CYB5R2,DDT,EPHA1,FBN1,FRZB,FZD1,GATA3,GRIK5,HOXC13,HOXD10,HOXD11,HOXD8,HOXD9,IBSP,IGFBP3,KCNA1,KCNK1,KLK3,LCN2,MAL2,MLH1,MMP2,MYH4,NKD2,NOTCH2,PIK3IP1,RUNX1,RUNX2,S100A8,SERPINA1,SFRP4,SNAI1,TGFB1,TIMP2,TP53,VDR,WASF1,WIF1
HMGB2	0.238	transcription regulator		-1.954	-1.957	0.0016	BAX,CCND1,CEBPB,COL2A1,MMP14,PHLDA1,RUNX2
alpha-tocopherol		chemical drug		-0.894	-0.884	0.0016	ALB,BAX,BCL2,CCN2,CKM,HMOX1,TP53
ochratoxin A		chemical toxicant		0.294	0.294	0.0016	BAX,BCL2,CDH2,DDAH1,DSC2,GCLC,TIMP1
PLN		transporter				0.00163	AK1,ALDOA,FABP3,HSP90B1,KCNJ12,PGAM2,PGK1,RAB10,RAB1A,RAB21,RACK1,RAP1A,TPI1
PTGS1	-0.39	enzyme		-0.059	-0.064	0.00166	ARG1,ATP8A1,CEBPB,FGF2,GEM,MMP2,MYOZ1,PTGER2,PTGS1,TNNI2
n-3 fatty acids		chemical drug		-1.718	-1.717	0.00166	BAX,CAT,FADS1,GNMT,HMOX1,IRS1,IRS2,PIK3R1,PTGS1,SLC2A4	NFkB (complex),PPARA,SP1,TP53,n-3 fatty acids,reactive oxygen species
1,1-bis(3'-indolyl)-1-(4-hydroxyphenyl)methane		chemical reagent		0.106	0.112	0.00171	BCL2,CDH2,SLC2A4,SNAI1
DIM-C-pPhOH-3-Cl-5-OCH3		chemical reagent		-1.981	-1.994	0.00171	PGAM2,PHKG1,PYGM,SLC2A4
MED15	0.059	transcription regulator		0	-0.013	0.00171	BAX,CCND1,KCNK1,LIMA1
MFGE8	-0.048	other		-0.152	-0.154	0.00171	CCND1,CDH2,EDIL3,FGF2
MLH1	1.107	enzyme				0.00171	BNIP3,CCND1,MLH1,TP53
UCA1		other				0.00171	BAX,BCL2,PPP1R13L,TP53
miR-197-3p (and other miRNAs w/seed UCACCAC)		mature microrna		0.167	0.18	0.00171	ACVR1,CTNND1,TGFBR2,TSPAN3
protocatechuic acid		chemical - endogenous non-mammalian		0	-0.009	0.00171	APP,HMOX1,SLC40A1,SOD2
NFE2L2	0.007	transcription regulator		-0.433	-0.463	0.00173	ABCB4,ACE,ADH7,ALAS1,ALDOA,BCL2,BNIP3,CA11,Calm1 (includes others),CAT,CCN2,COQ7,CS,CTSD,CTSK,EIF3C,EPB41,ERP29,FXYD1,GADD45G,GAS2,GCLC,GSTO1,HIPK2,HMOX1,HSP90AB1,HSP90B1,HTATIP2,INMT,KLK3,Mt1,NSMF,NUCB2,PDIA3,PDIA4,PHGDH,PHKA1,PSAT1,Ptprd,RACK1,SERPINA3,SLC38A1,SOD2,TGFB1,TMED2,TP53,TPI1,Tpm1,UGDH,USO1,VCAM1
Histone h3		group				0.00174	ANK1,AQP5,BAX,BCL2,CA4,CA9,CCND1,CDK14,COL1A2,ENO3,EPHB3,FGFR1,FOXP4,GAPDH,GAS2,GATA3,GRIK5,HIVEP3,ID1,IGFBP3,IGFBP4,KL,KLK3,MAD1L1,MET,Mt1,NDUFA12,NDUFA5,NDUFB6,NDUFC2,NDUFS1,NDUFS3,NDUFS4,OPA1,POLD4,RAB38,RPL12,RPS6,RPS9,RUNX1T1,RUNX2,S100A8,SGK1,SNAI1,SOD2,SPP1,SYPL2,TBX6,TGFB1,TGFBR2,UQCRC1,UQCRC2,WASF1,WLS,ZBTB18
SCX	0.319	transcription regulator		-0.115	-0.106	0.00174	COMP,ID1,POSTN,SNAI1,SPP1,TNC
KNG1		other		0.651	0.638	0.00176	APP,CALR,CCN2,CCND1,COL1A2,FGF2,PTGS1,TGFB1
TIMP1	1.053	cytokine		0.707	0.702	0.00176	CD44,IGFBP3,IL33,MET,MMP2,PLAT,TIMP2,TP53
SPP1	1.361	cytokine		0.671	0.653	0.00178	ARG1,BAX,BCL2,CD163,CD44,CDH2,HMOX1,HTATIP2,LIF,MMP14,MMP2,NDUFA9,NDUFB9,NDUFS4,PIK3R1,RUNX2,SERPINF1,SNAI1,SPP1,TGFB1,TGFBR2,TIMP1,TP53,UQCRC2,VAT1
GATA4		transcription regulator		-1.018	-1.025	0.00179	ACTC1,ASCL1,ASPRV1,BCL2,CCBE1,CCK,CCN2,CLSTN2,COL1A2,CRABP2,DAB2,DIO2,ECM2,FAP,FGF2,GATA3,GJA5,LTBP2,MMP27,MYL1,MYLPF,PHKA1,POSTN,PTGS1,SPP1,THBS4,TIMP1,VCAM1
FGF1	-0.56	growth factor		0.452	0.458	0.00182	ALB,CAVIN4,CCN2,CCND1,CDH11,CPXM1,DUSP6,FGFR1,FZD1,GADD45G,GCLC,HMOX1,IRS1,NDNF,PMEPA1,POSTN,SPP1,TGFB1,TGM2,VCAM1
TRPS1	0.088	transcription regulator		-1.177	-1.168	0.00183	ENPP1,GALNT3,IBSP,MMP2,NOTCH2,PHOSPHO1,Ptprd,RUNX1,RUNX2,SNAI1,VDR
miR-30c-5p (and other miRNAs w/seed GUAAACA)		mature microrna		0.939	0.97	0.00184	ACVR1,ANPEP,CCN2,COL1A2,COL4A5,CPNE8,CRTAP,GPD2,IRS2,LRRC8C,MBNL1,MET,NPR3,PGM1,RUNX2,SLC38A1,TGFBR2,TMED2,TNFAIP2,TP53,Tpm1,UAP1
AMPK		complex		-0.777	-0.78	0.00185	ACE,AR,BAX,CAT,CS,Esrra,HMOX1,IDH3A,KCNB1,LITAF,NOX4,RUNX2,SLC2A4,SNAI1,TP53,UCP2,VCAM1
TFAP2A	2.119	transcription regulator		0.971	0.976	0.00185	ANXA1,BAX,BCL2,DCBLD2,DCLK1,F2R,GEM,ITGBL1,KLHDC3,Ly6a (includes others),MMP14,MMP2,PLAAT3,RPS5,SLC19A1,SOD2,TIMP1
GLI1	0.299	transcription regulator		-0.395	-0.424	0.00188	ACADVL,BCL2,CCND1,Cd24a,CD44,CDH11,CMBL,COL2A1,DEGS1,DIO2,FGF1,IBSP,IRS1,KLK3,MAN1C1,MAPK11,MLH1,MMP11,MMP2,NREP,PAPSS2,PCOLCE2,RUNX2,SNAI1,SOX6,SPP1,TNC,TP53,WIF1
Vegf		group		-0.064	-0.099	0.0019	ACE,ADAMTS1,ANGPT4,ANGPTL7,ANPEP,APLN,AQP4,BAX,BCL2,CD44,CDC14A,CHI3L1,CNTFR,COL4A3,CRABP1,DCBLD2,DDX3X,DUSP6,ENPP2,ESM1,FAIM2,FGF2,GEM,HK2,HMOX1,ID1,IGFBP3,IGFBP4,LCN2,LEF1,LPAR1,LYVE1,MAPK14,MET,MGP,MMP14,MMP2,Mt2,NAMPT,NGB,PHLDA1,PKDCC,PLPP3,PPP1R1B,RGS9,SGK1,SLC20A1,TCF23,TGFB1,TGFBR2,TIMP1,TMC7,TNC,TNFRSF11B,UGCG,VCAM1
mir-181		microrna		0.175	0.19	0.00191	ADCY9,APP,AR,BCL2,CD163,DUSP6,MMP14,RUNX2,SIX2,SLC47A1,TGM2,VCAM1
ursodeoxycholic acid		chemical - endogenous mammalian		1.145	1.139	0.00192	BAX,CCN2,COL1A2,GCLC,IRS1,MAF,PDGFRB,PRKCZ,SPP1,TGFB1,TIMP1,TP53,VDR
PTGS2	-0.148	enzyme		-0.318	-0.33	0.00199	ANXA1,BAX,BCL2,CCND1,CD163,CD44,CDK5,CTSD,CTSK,CXCL14,GRIN2A,IGFBP3,LTBP1,MMP14,MMP2,NKD2,PRKCZ,PTGER2,PTGS1,RPS19,RUNX2,SNAI1,TGM2,TP53
baicalin		chemical - endogenous non-mammalian		0.287	0.276	0.00204	ACE,ASCL1,BCL2,CCNG1,HMOX1,IGFBP5,MDK,MVP,RBP1,TNFRSF11B
L-triiodothyronine		chemical - endogenous mammalian		-0.516	-0.534	0.00205	ACTC1,ADCY9,ALB,APP,AR,BAX,Cbr2,CCN2,CCND1,CD44,CPT1B,CS,CST3,CTH,CXCL14,DIO2,EGR2,EIF4EBP2,ELOVL3,ENPP2,FGFR1,FNDC5,GCK,GLS2,GPD2,ID1,ID3,IDH3A,IGFBP3,IGFBP4,KCNK1,LCN2,LRP1,MAMDC2,MMP14,NTNG1,PGK1,PHOSPHO1,PRKCZ,PSAT1,RASGRP1,RBP1,RCAN2,RET,RGS9,RUNX2,SLC2A4,SLC9A1,TGM2,TP53,UCP2
FAS	-0.28	transmembrane receptor	Inhibited	-2.122	-2.12	0.00205	BAX,BCL2,BGN,CAMK2B,CCN2,CD44,COL1A2,CRYBG1,CSNK1G2,CTNND1,EGR2,FAIM2,FBN1,FGL2,GADD45G,GNG7,IQGAP2,LUM,MET,MGP,P2RY2,PKN2,PPFIBP2,PTGER2,PTP4A2,PTX3,PVALB,RGS3,RRAGD,RUNX2,SLPI,SOD2,SPP1,STK17B,STK38L,TFRC,TGFB1,TNC,TNFRSF11B,TSPAN3,UGCG,VCAM1	AHR,Akt,ERK,FAS,NFkB (complex),P38 MAPK,PPARGC1A,RUNX2,SP1,TP53,estrogen receptor
mir-29		microrna	Activated	2.398	2.416	0.00209	AR,BCL2,BCL2L2,CCND1,CD276,COL1A2,COL4A5,CTNND1,ITGA11,MMP2,PDGFRB,PIK3R1,RUNX2,TP53,Tpm1	Akt,NFkB (complex),PIK3R1,PPARGC1A,RUNX2,SP1,TP53,mir-29
prednisolone		chemical drug		1.688	1.706	0.00214	APP,ARG1,BAX,BCL2,BCL2L2,BNIP3,CAT,CD163,CDK5,GAA,GABARAPL2,GM2A,IRS2,KCTD12,LDLRAD4,LIMK2,MAPK14,MB,NOTCH2,PFKP,PGK1,PLAT,PRKAA2,SDC2,SGK1,SLC41A3,SOD2,SPP1,TGFB1,TGM2,TNFRSF11B,TP53,TSC22D3	AHR,MAPK8,NFkB (complex),P38 MAPK,PPARGC1A,RUNX2,SP1,TP53,estrogen receptor,prednisolone
carbenoxolone		chemical toxicant		-0.154	-0.148	0.00216	BAX,CCN2,DEPP1,FGF7,NOX4,SPP1,TIMP1
CXCR4	0.09	g-protein coupled receptor		-0.128	-0.139	0.0022	BCL2,CCND1,CD44,CDH11,CDH2,DPP4,ID1,MMP2,PGK1,RUNX2,TP53
PDGFB	-0.016	growth factor		0.799	0.788	0.0022	COL1A2,FGF1,FGF7,MMP2,NOTCH2,PDGFRB,PHLDA1,SERPINF1,SPP1,TIMP1,TNC
GNA14	-0.415	enzyme				0.00225	ADAMTS1,ANPEP,ARG1,BNIP3,ENPP1,GADD45A,GALE,HK2,LIF,NPR3,PHLDA1,PLAT,SGK1
SPDEF	-0.919	transcription regulator	Inhibited	-2.335	-2.321	0.00225	CCN2,CDH11,CDH2,COL13A1,COL16A1,COL4A5,DKK3,FGFR1,KLK3,LEF1,SDC2,TGFB1,TNC
COL18A1	0.218	other		1.284	1.304	0.00225	ANTXR1,BCL2,CCND1,DDIT4,EDNRB,EPHB2,F2R,FGF2,FGFR1,HK2,ID1,ID3,LDHA,MAX,MMP2,TUBA1A
PTK2	0.062	kinase		-1.094	-1.103	0.00226	CCND1,COL1A2,IRS1,MMP2,PCOLCE2,PDGFRB,SNAI1,SPP1,TIMP1,TNC,TP53,VCAM1
NRXN1	0.178	transporter				0.00228	CD47,CTNNA3,EPHA7,FBLN5,FLRT2,MGP,TGFB1,TNC
PTH1R	-0.238	g-protein coupled receptor		-1.154	-1.159	0.00228	AR,CCND1,GALNT3,KL,MGP,SPP1,TNFRSF11B,ZNF521
betulinic acid		chemical drug		0.192	0.201	0.00228	AR,BAX,BCL2,CCND1,MMP2,NOX4,TIMP1,TIMP2
green tea polyphenol		chemical drug		0.788	0.793	0.00228	ANXA1,BAX,HMOX1,IGFBP3,MMP2,PIK3R1,TGFB1,TP53
ramipril		chemical drug		-0.788	-0.773	0.00228	CCN2,COL1A2,COL4A5,MAPK14,MMP2,TGFB1,TIMP1,TIMP2
IL1A		cytokine		1.732	1.708	0.00229	ADAMTS1,APP,BAX,BCL2,CD44,CTSK,DPP4,FGF2,FGF7,FGFR1,HMOX1,HSPG2,IGFBP5,IRAK1,LCN2,LDHA,LIF,MMP14,MMP2,PTX3,S100A8,SERPINA1,SERPINA3,SOD2,SPP1,TAC1,TGFB1,TIMP1,TNFRSF11B,VCAM1	AHR,Akt,ERK,IKBKB,IL1A,NFkB (complex),P38 MAPK,PPARGC1A,RB1,RUNX2,SP1,TP53,estrogen receptor
HOXA9	0.013	transcription regulator		0.14	0.128	0.00234	BCL2,CBX6,CISH,CTH,ENPP1,ERG,FXR1,FZD1,HIGD1A,HOXD10,HOXD11,IRX3,ITGBL1,MAFB,MBNL1,MSI2,NFIA,PIK3R2,RAB31,RPL27A,S100A8,SDC4,SLC27A6,SPP1,TSC22D3
camptothecin		chemical drug		-0.27	-0.278	0.00235	AK4,ALDOA,AR,BAX,BCL2,CAMK2B,CCND1,CCNG1,CD47,CRYBG1,CSNK1G2,CTNND1,DUSP6,EEF1A1,EEF1B2,EGR2,ENC1,ENO3,FGL2,GADD45A,GADD45G,GAPDH,GNG7,GRINA,HJURP,HOXC13,ID1,ID3,IER5,IGFBP3,IQGAP2,KLHL21,LDLRAD4,LITAF,MAD1L1,MAD2L1BP,Mt1,P2RY2,PKN2,PPFIBP2,PPIF,PTGER2,PTP4A2,PTX3,PVALB,RGS3,RRAGD,SDC4,SLC2A4,SLPI,SOD2,SPP1,STC2,STK17B,STK38L,TFRC,TGFB1,TNFAIP1,TOB1,TP53,TPBG,TRO,TSPAN3,UGCG,VCAM1
1,2-dithiol-3-thione		chemical reagent		-0.037	-0.063	0.0024	ALAS1,ALDOA,BNIP3,CA11,COQ7,CTSD,EIF3C,EPB41,ERP29,FXYD1,GAS2,GCLC,HMOX1,HSP90AB1,HSP90B1,HTATIP2,INMT,NUCB2,PDIA3,PDIA4,PSAT1,RACK1,SERPINA3,SOD2,TFRC,TMED2,TPI1,Tpm1,USO1
RETNLB		other		1.195	1.172	0.0024	CAMK2B,CCN2,COL1A2,FAP,FGFR1,FRZB,FZD1,IRS1,IRS2,JAK1,MMP2,STK17B,TGFB1,THBS4,TIMP1
sphingosine-1-phosphate		chemical - endogenous mammalian		0.681	0.668	0.0024	CCN2,CCND1,CD44,ENPP2,FGF2,KCNH2,MMP14,NRP2,PRPH,RUNX2,S1PR3,TGFB1,TIMP1,TNFRSF11B,VCAM1
Ige		complex		1.147	1.115	0.00246	ALAS1,ANXA1,ARG1,ARRB1,BCL2,CISH,COQ7,CTSK,CYCS,DUSP3,DUSP6,EGR2,EMILIN1,F2R,FXYD6,HIVEP3,HMOX1,IL33,LIF,Marcks,MCF2L,NXPE4,PIK3IP1,Plpp1,PPIF,PTPRS,PTX3,RAB7B,RASGRP1,RUNX1,SERPINB6,SLC6A19,SPP1,SRGAP3,TFRC,TGFB1,TNC,TNFRSF11B,Tpm1,TPPP3,UGCG,VCAM1,VDR
ADRB1	0.239	g-protein coupled receptor				0.00249	ACTC1,APP,IRAK1,Marcks,SLC9A1,Tpm1
acteoside		chemical - endogenous non-mammalian		0.866	0.869	0.00249	BAX,BCL2,HIPK2,MAP2,MMP2,TP53
magnesium		chemical - endogenous mammalian				0.00249	BMP6,MGP,PTP4A2,RUNX2,TNFRSF11B,VDR
U0126		chemical - kinase inhibitor		-1.488	-1.458	0.0025	ARHGEF2,ATP6AP2,BAX,BCL2,BMP6,CA9,CACNB3,CCN2,CCND1,CD44,CEBPB,COL2A1,DAB2,DDAH1,DUSP6,EDNRB,EEF1A1,EEF2,ENPP2,FGF2,FLT3LG,GALNT3,GCLC,GRN,HMOX1,HSP90AB1,JDP2,KCNN4,KCTD2,KLK3,LAMP2,LIF,LIFR,MET,MMP2,NREP,NXPH4,PABPC1,PHLDA1,POSTN,RPS6,RUNX1,RUNX2,RXRG,SGK1,SNAI1,SOD2,SPP1,STC2,TAC1,TGFBR2,TGM2,TIMP2,TNFRSF11B,TP53,TSC22D3,VCAM1,WWTR1
lithium chloride		chemical drug		-1.243	-1.259	0.0025	APP,AR,ASS1,BAX,BCL2,CCND1,CD44,CKM,GATA3,HMOX1,KLK3,LEF1,Marcks,MMP2,NKD2,POSTN,PTX3,SNAI1,TP53
moxonidine		chemical drug		-0.625	-0.63	0.0025	ANPEP,IRS1,KL,P2RY2,TGFB1
PP2/AG1879 tyrosine kinase inhibitor		chemical - kinase inhibitor		1.725	1.739	0.00252	ACE,BCL2,CCN2,CDH2,EPHA3,FGF2,GFPT1,HMOX1,HOXD10,ID1,KLK3,SOD2,SPP1,TP53	AHR,Akt,CREBBP,ESR1,MAPK8,NFkB (complex),PI3K (complex),PP2/AG1879 tyrosine kinase inhibitor,PPARGC1A,RB1,RUNX2,SP1,TAF4,TP53,estrogen receptor
5-nitro-2-(3-phenylpropylamino)benzoic acid		chemical reagent				0.00258	BAX,CCND1,CLCN3
CANX	0.141	other				0.00258	BAX,BCL2,NOX4
CELF2	-0.018	other				0.00258	BAX,BCL2,TP53
LUCAT1		other				0.00258	BAX,BCL2,TP53
MME	0.07	peptidase				0.00258	APP,MAP2,TAC1
MPO		enzyme				0.00258	APP,EDNRB,VCAM1
globotriaosylceramide		chemical - endogenous mammalian				0.00258	CD44,FGF2,LAMP2
mir-197		microrna				0.00258	ACVR1,CTNND1,TSPAN3
KMT2D	0.006	transcription regulator		-0.057	-0.084	0.0026	ARTN,CA4,CTSD,DSC2,DSC3,EBF4,ENO3,FABP3,GK5,GPRC5C,GRHL1,GUSB,LOXL1,MEOX1,METRNL,NPR3,RAB38,RELL1,S100A8,STBD1,SYPL2,TGM1,TUSC1,WTIP,Zfp948,ZNF641,ZNF750
SNAI2	-0.159	transcription regulator		0.046	0.042	0.00263	AR,CCN2,CCND1,CDH2,COL2A1,EGR2,IBSP,MMP14,RUNX2,TP63,VDR
enalapril		biologic drug		-0.365	-0.369	0.00263	ACE,ADAMTS1,AGTR2,LCN2,SPP1,TGFB1,TGFBR2,TGIF1,TIMP1,UCP2,VCAM1
USF2	-0.064	transcription regulator		0.575	0.561	0.00266	APLN,CHI3L1,CPT1B,GATA3,GCK,HMOX1,IGFBP3,KLK3,OXT,SPP1,TGFB1,UCP2
fatty acid		chemical - endogenous mammalian		-0.397	-0.416	0.00267	BAX,BCL2,CCK,CPT1B,CREB3L3,FADS1,GCK,HMOX1,IRS1,LEPR,NDUFB6,PLIN5,RBP4,S100A8,SLC2A4,UCP2,VCAM1
ADIPOQ	0.072	other		-0.556	-0.56	0.00269	ARG1,BCL2,CCN2,CCND1,CD163,FABP3,GCK,GRN,HMOX1,IRS1,LEPR,MMP2,NOX4,PRDX5,PRKAA2,SLC2A4,SOAT1,SOD2,TGFB1,TIMP1,TP53,UCP2,VCAM1
SRF	-0.127	transcription regulator		-1.614	-1.622	0.00281	ACTC1,AMD1,ARHGAP20,ASB5,BCL2,BICC1,BPGM,CCN2,CKM,CMA1,CNN2,EGR2,EYA2,FGF1,FILIP1L,GADD45A,GADD45G,HIPK1,HMOX1,HSPG2,LCN2,LEPR,LRP1,LRP4,MCF2L,MYH1,MYH4,MYL1,MYLPF,MYOM1,NPM1,PGM1,PMFBP1,S100A8,SHOC2,SLPI,SMTN,SPTBN2,TNC,Tpm1	MRTFA,MRTFB,SRF
IL13		cytokine		0.728	0.706	0.00284	ACADVL,ADA,ARG1,ASPN,BAX,CCN2,CD163,CD44,CEBPB,CHI3L1,CISH,COL1A2,CTSK,CTSV,CYSLTR1,ENPP2,F13A1,FADS1,FAM162A,FCGR2A,GATA3,HMOX1,HTRA1,JAK1,LTBP1,MAF,MMP14,MMP2,PFKP,PHLDA1,POSTN,RIN2,S100A8,SERPINA1,SERPINF1,SLPI,SPP1,SYNGR2,TFRC,TGFB1,TGM2,TIMP1,TIMP2,TNFRSF11B,TNXB,TPSAB1/TPSB2,VCAM1
PLA2R1	-0.063	transmembrane receptor		-1.309	-1.327	0.00288	CTSA,CTSD,NDUFA5,NDUFS3,SOD2,TGM2,UQCRFS1
cobalt chloride		chemical reagent		-0.439	-0.455	0.0029	ADAMTS1,ALDOA,ANPEP,BCL2,BNIP3,CA9,DDIT4,HMOX1,HSP90AB1,PGK1,SERPINF1,SLC40A1,TFRC,TP53
phorbol esters		chemical - other		1.349	1.332	0.0029	ANXA1,APP,CD44,CDH2,HK2,LIF,PLAT,SLC12A2,SLC1A2,SOD2,TGFB1,TGM1,TIMP1,VDR
Calcineurin A		group		-0.378	-0.391	0.00291	CCN2,CCND1,COL1A2,FGF18,MB,SLC2A4,TGFB1,TIMP1
Nuclear factor 1		group				0.00291	ALAS1,ALDOA,AR,CHI3L1,ID1,SERPINA3,SLC2A4,TP53
IL1		group		1.633	1.61	0.00294	ADAMTS1,ALB,APP,AQP2,AR,BAX,BCL2,CHI3L1,COL2A1,FGF7,GCK,H19,HMOX1,IL17RD,IL33,LIF,LRP1,MAP2K6,MMP2,NRP2,PDGFRB,PTGS1,RBP4,RUNX2,SDC4,SOD2,TAC1,TGFB1,TGM2,TIMP1,TNC,TNFRSF11B,TP53,UGCG,VCAM1	AHR,Akt,ERK,IL1,NFkB (complex),PPARGC1A,RUNX2,SMAD7,SP1,TGFB1,TP53,estrogen receptor,reactive oxygen species
10E,12Z-octadecadienoic acid		chemical - endogenous mammalian	Activated	2.095	2.093	0.00296	APLN,ASCL1,BCL2,CAMK2B,CITED1,CLCN1,CLIC5,CPT1B,EGR2,FADS1,GDF5,IGFBP3,LRP1,NAMPT,NPTX1,PODN,SCN4A,SLC2A4,SOX6,TRIB3,TUBA8,UCP2,Vnn3	10E,12Z-octadecadienoic acid,NFkB (complex),PPARA,TP53,palmitic acid
2-bromoethylamine		chemical reagent		0	-0.018	0.00301	ADAMTS1,ANXA1,CD44,FCGR2A,FXYD5,LCN2,SPP1,TGIF1,TIMP1,TSPAN8
metformin		chemical drug	Inhibited	-2.35	-2.346	0.00302	ALDOA,ARG1,BAX,BCL2,CCN2,CEBPB,DDIT4,ENO3,HMOX1,IRS1,PGAM2,PHKG1,PYGM,RUNX2,SERPINF1,SLC2A4,SLIT2,SOD2,TGFB1,TP53,TP63,UCP2	AHR,Akt,ERK,ESRRA,NFkB (complex),PPARA,PPARGC1A,RUNX2,SP1,TP53,estrogen receptor,metformin,rosiglitazone
triptolide		chemical drug		-0.181	-0.158	0.0031	ACVRL1,APLN,AR,BAX,BCL2,BMP6,CADM1,DPP4,EDNRB,FBLN5,FBN1,FGF18,IGFBP3,IL17RD,LEF1,LIFR,MMP11,PDGFRB,POSTN,TP53
AGER	-0.597	transmembrane receptor		0.278	0.267	0.00312	APP,ARG1,BCL2,CCND1,CKM,CTSK,MMP2,S100A8,TGFB1,TNC,TP53,VCAM1
FOXC2	0.083	transcription regulator		-0.234	-0.249	0.00312	BAX,CDH2,IRS1,IRS2,LEF1,MET,MMP2,PDGFRB,RUNX2,SLC2A4,SNAI1,TP53
HAND2	0.076	transcription regulator		-0.99	-1	0.00312	ACTC1,CCBE1,CLSTN2,COL1A2,ECM2,FAP,GJA5,GREM1,HOXD11,MMP27,PHKA1,PTGS1
RASSF1	-0.111	other		0.578	0.576	0.00312	BCL2,CCND1,CDH2,COL13A1,CRABP2,DAB2,EPB41L3,FGF2,IGFBP3,LIF,LITAF,MDK,MMP2,SPP1,TGM2
vancomycin		biologic drug		-0.037	-0.051	0.00312	ADAMTS1,ANXA1,CAT,CD44,FCGR2A,FXYD5,HMOX1,LCN2,NOX4,SOD2,SPP1,TGIF1,TIMP1,Tpm1,TSPAN8
EFNA2	0.724	kinase		0	-0.003	0.00312	CCN2,CRABP2,DCBLD2,DUSP6,KLK3,PLAT,RUNX1,SLC20A1,TGM1,TRIM5,WWP1
Pro-inflammatory Cytokine		group		0.339	0.328	0.00312	ASS1,CD47,ENPP1,FGF2,GCLC,HMOX1,LCN2,LIPG,SDC4,TIMP1,VCAM1
STAT6	0.013	transcription regulator		1.335	1.331	0.00313	ABLIM1,ANO1,ANXA1,ARG1,ASS1,BAX,BCL2,Bst2,Ccdc50,Cd24a,CISH,COL1A2,CPOX,DDAH1,EGR2,EXT1,FADS1,FCGR2A,FLRT2,GADD45G,GATA3,GBP6,Gm12854/S100a11,HIPK2,Iigp1,IL33,IRS2,KCTD12,KSR1,LIF,LIFR,Ly6a (includes others),LY6D,MAF,MMP14,MMP2,NEDD9,SERPINA1,SERPINB6,SERPINF1,SYNGR2,TGFB1,Tgtp1/Tgtp2,TIMP1,TLE1,TMTC1,Trim30a/Trim30d,VCAM1
CHRNA3		transmembrane receptor		0.042	0.029	0.00319	BCL2,GATA3,JAK1,TP53
TEAD		group				0.00319	CCN2,CCND1,CD44,POSTN
alpha-tocopherol succinate		chemical drug		0.728	0.741	0.00319	BCL2,FGF1,FGF2,VCAM1
mir-634		microrna		0.97	0.984	0.00319	AR,LAMP2,OPA1,RAB1A
FOLR1	0.748	transporter				0.00327	ACVR1,ADA,AQP4,BASP1,CAT,COQ7,DTD1,DUSP6,FBXO3,LPAR1,MDK,OSBPL1A,SLC3A2,SYNGR2,TAC1,TPI1
Nfat (family)		group		-0.767	-0.79	0.00327	BCL2,CCND1,CTSK,DKK3,EGR2,ELL2,ESM1,FGF18,MB,NOX4,RGS3,RHOJ,RNF128,SDC4,SOD2,VCAM1
FN1	1.278	enzyme		-0.183	-0.203	0.00333	ACE,APP,BCL2,CCN2,CCND1,CDH2,CEBPB,CTSD,DDX3X,FGF2,IRS1,KCNH2,MAX,MGP,MMP14,MMP2,RRAGD,RUNX2,SDC4,SLC9A1,SNAI1,SPP1,TGFB1,TGFBR2,TGM2,TIMP2,TNFAIP2
N-acetylsphingosine		chemical reagent		0.146	0.139	0.00338	BAX,BCL2,BNIP3,CAT,CEBPB,COL1A2,SOD2,TP53,UGCG
SUMO2	-0.073	enzyme		-0.853	-0.849	0.00338	Bst2,CTH,IRS1,MMP14,MOXD1,PIK3R1,PIK3R2,TNC,TSC22D3
herbimycin		chemical - kinase inhibitor		-1.219	-1.206	0.00338	ARG1,BCL2,CCN2,CCND1,F2R,IRS1,MMP2,SOD2,TNFRSF11B
corticosterone		chemical - endogenous mammalian	Activated	2.983	2.979	0.00344	ANXA1,APP,BCL2,CCK,CCN2,CCND1,CPT1B,DDIT4,DIO2,FGF2,FGF7,GCK,H19,NOX4,SGK1,SLC1A2,TIMP1,TSC22D3,UCP2	AHR,Akt,L-glutamic acid,MAPK8,NFkB (complex),P38 MAPK,PPARGC1A,RB1,RUNX2,SP1,TP53,corticosterone,estrogen receptor
SULF2	0.705	enzyme		0.617	0.609	0.00346	BCL2,CCND1,COL2A1,MMP2,POSTN,TGFB1
TGFB1I1	0.121	transcription regulator		0.143	0.138	0.00346	AR,ID1,KLK3,LTBP1,LTBP2,NOX4
acetaldehyde		chemical - endogenous mammalian		0.946	0.935	0.00346	CEBPB,COL1A2,MMP2,SMOX,TGFB1,TIMP1
MAP2K1	-0.061	kinase		0.339	0.317	0.00347	BCL2,CAPN3,CCN2,CCND1,CD44,CKM,COL1A2,CRIM1,DAB2,DPP4,DUSP6,EGR2,F2R,FGF2,GUSB,IRS1,LEF1,MMP14,MMP2,RAB38,RRAGD,RUNX2,SERPINA1,SERPINE2,TGM2,TNC
NKX2-1		transcription regulator		-0.005	-0.016	0.00347	AGTR2,AQP5,CA4,CHAD,CNMD,COL9A1,DIO2,DPP4,EDIL3,ENC1,ENPP2,EPHB3,INMT,LCN2,LEF1,MATN4,MMP2,NECTIN3,PDPN,RBPJL,RET,SNAI1,TGFB1,TMEM37,TNC,TP63
methylmercury		chemical toxicant		-0.832	-0.835	0.00351	ANPEP,ATF5,BAX,BNIP3,CCNG1,CD47,CITED2,FBXO3,HMOX1,IGFBP3,Mt1,NDUFS1,YWHAQ
PRL		cytokine		1.002	0.978	0.00357	APP,BCL2,CCND1,CISH,COL1A2,CST3,CTSA,CTSD,CTSV,ID1,ID3,IGFBP3,IGFBP5,LYVE1,Marcks,MGP,MICOS10-NBL1/NBL1,MMP14,OXT,PARM1,PDIA4,PDPN,PLAT,PTGFR,RPSA,SERPINA3,SHFL,SPP1,TGFB1,TIMP1,TIMP2,TP53,TP63,VDR
IL5		cytokine		-1.097	-1.134	0.00359	ALDOA,ASS1,BCL2,BNIP3,CA4,CISH,CITED2,CYSLTR1,DUSP6,EGR2,ELL2,FAM162A,FGL2,GADD45A,GADD45G,GCAT,HIGD1A,HSP90B1,KCNAB2,KLHDC2,LIMK2,LRRC8C,LUM,METRNL,PFKP,PGM1,PPIF,PSAT1,RAB21,RIPOR2,SCEL,SGK1,SLC16A3,TGFB1,TPI1
FOSL2	-0.248	transcription regulator		-0.339	-0.349	0.00362	CEBPB,COL1A2,DIO2,Gm12854/S100a11,MMP2,RUNX2,S100a7a,SPP1,TIMP1,TP53
SMAD1	0.043	transcription regulator		0.326	0.31	0.00362	CCN2,COCH,COL1A2,COL2A1,GRN,IBSP,ID1,RUNX2,SPP1,VCAM1
Calcineurin protein(s)		complex		-0.47	-0.484	0.00364	AQP5,BCL2,CKM,CPT1B,CTSV,EGR2,FGF18,MB,NFATC4,PVALB,RNF128,SPP1
FMR1	-0.109	translation regulator		1.608	1.622	0.00364	ALDOA,APP,BASP1,CAMK2A,CLSTN2,EEF2,FXR1,GAPDH,IGFBP4,LYNX1,MRPS23,PFKP,PLAT,RPSA,SASH1,SLC1A2,SLC29A1,SLC38A1,SPON1,SYN1,UQCRFS1,ZCCHC12
CLEC11A	-0.158	growth factor		1.205	1.196	0.00369	ALDOA,ANXA1,BCL2,CDH2,EGR2,LDHA,Mcpt4,RUNX2,SLPI,TAC1,Tpsab1
hexachlorobenzene		chemical toxicant		0.302	0.282	0.00369	ANXA1,CD44,FCGR2A,FXYD5,LCN2,MMP2,SPP1,TGIF1,TIMP1,Tpm1,TSPAN8
vitamin D		chemical drug		0.579	0.578	0.00369	ADAMTS1,BAX,BCL2,BCL2L2,CASR,KL,MGP,S100A8,SGK1,SPP1,VDR
bisphenol A		chemical - endogenous mammalian		1.155	1.138	0.00375	ALAS1,AQP5,AR,ARNT2,ATP5PO,BAX,BCL2,CCN2,CITED2,CTSD,GABRB3,GK5,HSP90AB1,HSP90B1,LAMP2,LCN2,OXT,POSTN,PTPRS,RPN2,SLC2A4,STK17B,SYN1,TP53
vitamin K3		chemical drug		0	-0.012	0.00376	BAX,BCL2,BMP6,ESM1,HK2,HMOX1,NAMPT
PARK7	-0.436	enzyme		-1.467	-1.47	0.00378	AR,BAX,NOX4,RET,SOD2
SRSF3	-0.084	other		-0.492	-0.498	0.00378	BCL2,CCND1,CD44,HIPK2,TP53
TARBP2	-0.211	other		0.811	0.805	0.00378	MAF,MYL1,RET,SOX6,TNNI2
5-N-ethylcarboxamido adenosine		chemical reagent		0.148	0.149	0.00378	ALB,ARG1,CCN2,COL1A2,EGR2,FGF2,FZD1,GADD45A,GCLC,HK2,HMOX1,MMP11,PROCR,RGS3,SYPL2,TGFB1,VDR
ARNT	-0.12	transcription regulator	Inhibited	-2.132	-2.15	0.00382	ALDOA,ATP5PO,BCL2,BNIP3,CA9,CITED2,CTSD,DEGS1,GAPDH,HK2,IRS2,LDHA,NDUFS3,NDUFS4,PGK1,TFRC,TP53,TPI1	ARNT,CREBBP,ESR1,FOXM1,NFkB (complex),RB1,SP1,TAF4,TP53,YBX1
MIF	-0.08	cytokine		-1.146	-1.163	0.00382	ARG1,ATF5,BAX,BCL2,CCND1,CD44,CEBPB,COL4A4,F2R,MET,MFN1,MMP2,OPA1,SOX6,TGFB1,TIMP1,TP53,VCAM1
SOX2		transcription regulator		-0.991	-1.003	0.00384	ACVR1,ALB,AQP4,ASCL1,ASPRV1,BCAN,CASR,CCN2,CCND1,CD44,CDH2,CHST15,CHST3,CITED1,CITED2,CRABP2,CREB3L2,CST6,CXCL14,CYP26A1,DKK3,Foxp1,FRZB,FUT4,GATA3,GCK,GLTP,H19,Hrc,ID3,IER5,IRS1,IRX3,LBX1,LEF1,LIMA1,LPAR1,LRP4,MAX,PIK3R1,PLAAT3,PSAT1,RAP1A,SERPINA1,SLC12A2,SNAI1,SOX6,STRA6,TBX6,TGFB1,TGM1,TNFRSF19,TP63,WLS
SMAD4	0.018	transcription regulator		1.215	1.201	0.0039	ARHGEF2,BGN,CCN2,CCND1,CDH2,CITED2,CNMD,COCH,COL1A2,COL2A1,CTSD,FAP,GADD45A,HMOX1,ID1,LEF1,LPAR1,MET,NAMPT,PDGFRB,PTX3,RUNX1,RUNX2,SGK1,SLC25A4,SNAI1,TBX6,TGFB1,TIMP1,TNC
allopurinol		chemical drug		-0.498	-0.512	0.00401	ADAMTS1,ANXA1,ATP6AP2,CAT,CD44,FCGR2A,FXYD5,HMOX1,IRAK1,LCN2,SPP1,TGIF1,TIMP1,Tpm1,TSPAN8
Y 27632		chemical drug		-0.851	-0.84	0.00404	ADA,CCN2,CD44,CEBPB,COL12A1,COL2A1,MMP2,MYLPF,SOX6,TGFB1,TP53,Tpm1,VCAM1
NAMPT	-0.32	cytokine		-1.387	-1.397	0.00412	ID1,LEF1,NAMPT,NELL2,PDGFRB,PEG10,TFAP2A,TGFB1,TP53
ASPSCR1-TFE3		fusion gene/product	Activated	2	1.973	0.00415	CTSA,CTSD,GLB1,GRN,HMOX1,HTATIP2,KLHL21,MET,RHBDF1,RRAGD,SCPEP1,SLC38A7,SLC9A1,SOD2,UAP1L1,VAT1
PITX2	0.054	transcription regulator		-0.581	-0.599	0.00417	CCND1,CDH2,COL1A2,COL8A2,GADD45A,GRHPR,LDHA,LEF1,ME3,MSC,NDUFB8,NDUFC2,NDUFS3,OXNAD1,RDH14,SHOX2,SNAI1,SOD2,TBX6,TFAP2B
cytokine		group		-0.12	-0.142	0.00417	AGTR2,APP,AQP4,BAX,BCL2,CCND1,CISH,FGF2,HMOX1,LIF,LIPG,Ly6a (includes others),MMP2,PLAT,PRPH,RPSA,SGK1,SOD2,TIMP1,VCAM1
tetrachlorodibenzodioxin		chemical toxicant		1.399	1.397	0.00417	ADH7,AR,ARNT2,BAX,BCL2,CCK,CCND1,CEBPB,CMA1,COL13A1,COL4A5,COL9A2,Cox8b,CTSD,CTSV,DSC2,EIF4EBP2,FGF9,GRHPR,HMOX1,HOXD10,IRS1,MICOS10-NBL1/NBL1,MMP14,NEDD9,NPTX1,PF4,PTGFR,RAB10,Rpl29 (includes others),S100A8,SHOX2,SLC16A10,SLC2A4,SLC40A1,STC2,TGFBR2,TGM1,TNC,TNFRSF19,TP53,TUBA8,UGDH
SOX9	-0.019	transcription regulator		0.157	0.145	0.00423	AR,CCN2,CDH2,CNMD,COL2A1,COMP,CREB3L2,CYP26B1,H19,HIVEP3,KLK3,RUNX2
MAPK7	0.029	kinase		-0.629	-0.643	0.00432	ADAMTS1,BCL2L2,CCND1,CDH2,HMOX1,ID1,PLAT,PTGER2,TP53,TP63
PLAG1	0.146	transcription regulator		-1.117	-1.13	0.00432	ATF5,BCL2,MAP2,MAPK11,PTP4A3,ROM1,SMARCD3,TGM2,TNNT3,TPSAB1/TPSB2
PRKCB	-0.206	kinase		-0.721	-0.731	0.00433	APP,BAX,CCND1,CYCS,FGF2,IRS2,MMP2,MYLPF,SOD2,TGFB1,TGFBR2
hydrogen peroxide		chemical - endogenous mammalian		0.98	0.953	0.00438	ACE,AEBP1,APP,AR,ATP6V1A,BAX,BCL2,CAT,CCN2,CCND1,COL1A2,CST3,CTSD,CYCS,DDIT4,EEF1A1,EEF1B2,ENC1,ENPP2,FGF2,GADD45A,GLS2,HIPK2,HMOX1,ID3,IER5,IRS1,LCN2,MAPK14,MB,MDK,MMP2,PDIA3,PDIA4,PTP4A2,PTX3,RUNX2,SGK1,SLC20A1,SLC39A7,SNAI1,SOD2,SPP1,TFRC,TGM2,TP53,TRIB3,UCP2,VCAM1,VDR
DNMT3A	-0.17	enzyme		0.458	0.464	0.00444	ACE,ACTC1,ADCY7,AGTR2,APLN,CAMK2A,CKM,CYSLTR1,FGF2,GRINA,IRS1,KCNA1,Mt1,MYH1,PPP1R14C,PPP1R3C,PTGS1,RCAN2,SDC4,SLIT2,SLN,SPP1,TGFB1,TGM2
maslinic acid		chemical - endogenous non-mammalian		0.447	0.46	0.00453	BAX,BCL2,CCND1,CD44,CD47,CEBPB,IRAK1,JAK1,LIMK2,MAP2K6,MAPK14,PIK3R1,SLC1A2,TGFB1,TP53
Pkc(s)		group		1.475	1.459	0.00455	ACAT1,APLN,APP,AQP2,AQP4,BCL2,CCN2,EGR2,FGF2,GADD45A,HMOX1,HSP90B1,IRS1,MAD1L1,MMP2,NOX4,PDIA4,PHLDA1,S100A8,SLC1A2,SPP1,STC2,TAC1,TGFB1,TGM1,VCAM1,VDR
YBX1	-0.057	transcription regulator		1.881	1.868	0.00463	COL1A2,FGFR1,HSD17B1,ID1,IGFBP3,MMP2,MVP,PFKL,SNAI1,SPON1,STC2,TGFB1,TP53	NFkB (complex),RUNX2,SMAD7,SP1,TGFB1,TP53,YBX1
carbon tetrachloride		chemical toxicant	Activated	2.013	1.994	0.00467	AK4,ALB,ASS1,BAX,Calm1 (includes others),CAT,CCN2,COL1A2,DCLK1,GADD45A,GCLC,H19,HMOX1,IGFBP5,MAPK14,MMP2,Mt1,Mt2,PDGFRB,RBP1,S1PR3,SOD2,SPP1,TGFB1,TGFBR2,TIMP1,TIMP2,VCAM1	AHR,FOXM1,NFkB (complex),P38 MAPK,PPARGC1A,RB1,RUNX2,SMAD7,SP1,TGFB1,TP53,Tgf beta,YBX1,carbon tetrachloride,estrogen receptor
CaMKII		complex				0.00468	ARG1,CD44,COL2A1,PRKCZ,SLC2A4,TP53
KLF10	-0.168	transcription regulator		0.929	0.93	0.00468	BAX,BCL2,CCND1,GATA3,PTGS1,TGFB1
Sb202190		chemical - kinase inhibitor		-1.052	-1.035	0.00471	BCL2,CCN2,CCND1,CDH2,CEBPB,CKM,HMOX1,MMP2,PHLDA1,S100A8,SGK1,SNAI1,TGM1,TIMP2,TP53,TP63,VCAM1,VDR
LONP1	-0.082	peptidase		-0.243	-0.231	0.00489	ACAT1,ATP5F1A,ATP5PF,CHCHD3,DLD,IDH3A,IMMT,PDIA3,PGAM1,SARS1,SOD2,UQCRFS1
E. coli serotype 0127B8 lipopolysaccharide		chemical - endogenous non-mammalian		0.451	0.44	0.00491	ANXA1,BCAN,CCN2,DIO2,EDNRB,EGR2,F2R,FGF1,FGF2,FZD1,GJA5,GNG7,HMOX1,LCN2,LIF,LIFR,PPP1R1B,PRDX5,PTX3,RACK1,S1PR3,SLC1A2,SOD2,SYNM,TGFBR2,TNFRSF11B,VIPR1
methapyrilene		chemical drug		0.535	0.536	0.00505	ALB,ALDOA,ASS1,CAT,CCND1,CCNG1,CST3,CTSV,EEF1A1,ENPP2,GADD45A,GCLC,HMOX1,MAPK14,Mt1,RPS8,RPS9,RXRG,SLC3A2,TP53
EFNA1	0.017	other		-0.913	-0.909	0.00507	CCN2,CRABP2,DCBLD2,DUSP6,EPHA3,FGF2,PLAT,SLC20A1,TGM1,TRIM5,WWP1
TSH		complex		0.511	0.498	0.00507	ARRB1,CCND1,ERP29,FZD1,GAPDH,IGFBP3,IGFBP5,Mt1,NOX4,SLC2A4,SOD2
BCL2	-0.389	transporter		-0.482	-0.491	0.00511	BAX,BCL2,BNIP3,CCND1,CCNG1,CKM,CLCN3,COL2A1,DLAT,GADD45A,GCLC,MMP2,TIMP1,TIMP2,TP53
Pdgf (complex)		complex		1.708	1.694	0.00511	BAX,BCL2,CCND1,CD44,FGF2,HMOX1,IRS2,MCM6,MMP2,NCAM1,NOX4,TGFB1,TIMP1,TP53,VCAM1	AHR,Akt,ERK,NFkB (complex),P38 MAPK,PPARGC1A,Pdgf (complex),RUNX2,SP1,TP53,estrogen receptor,reactive oxygen species
2,3,4,7,8-pentachlorodibenzofuran		chemical toxicant		1.32	1.318	0.00512	CAT,CCK,CD44,Cox8b,CYCS,EPB41L3,FGF9,GADD45A,GRHPR,PTGFR
capsaicin		chemical drug		0.913	0.913	0.00512	AQP5,BCL2,CAMK2A,CAT,CCND1,HMOX1,MMP14,MMP2,TAC1,TNFRSF11B
tributyltin		chemical reagent		-1.265	-1.265	0.00515	ANGPTL7,ASS1,CCN2,COL1A2,Cox5b,CYCS,CYP26B1,ELOVL3,IL33,KRT80,LDHA,NDUFS1,PARM1,PDGFRB,RCAN2,S1PR3,TNC,UQCRC1,UQCRC2
TMPRSS2-ERG		fusion gene/product		-1.414	-1.417	0.00522	CEBPB,CTH,DDIT4,DPYSL5,FAP,ID1,ID3,KLF11,LONRF2,LTBP2,MAPK11,OSBPL6,P2RY2,PHLDA1,PLAT,PSAT1,STC2,TRIB3
TBX5	-0.028	transcription regulator		-1.049	-1.063	0.00529	ACTC1,CCBE1,CLSTN2,COL1A2,ECM2,FAP,GJA5,MMP27,MYLPF,NFATC4,PHKA1,POSTN,PTGS1
apigenin		chemical - endogenous non-mammalian		0.8	0.814	0.00529	APLN,AR,BAX,BCL2,CCND1,DPP4,GCLC,HMOX1,KLK3,SLN,SOD2,TP53,VCAM1
CAMK2N2	0.182	other		1.982	1.987	0.00534	BAX,BCL2,CCND1,TP53
Ccl6	-0.191	cytokine		1	0.99	0.00534	CTSK,CTSV,MMP2,SERPINA1
MEMO1	-0.025	other		-0.192	-0.205	0.00534	CCND1,CTSD,SNAI1,STC2
Mir218		microrna		1.091	1.09	0.00534	IBSP,LEF1,SPP1,TOB1
ONECUT2		transcription regulator		0.45	0.46	0.00534	AR,BASP1,GRN,KLK3
TAPI-1		chemical - protease inhibitor		-0.762	-0.749	0.00534	APP,LEPR,MMP2,VCAM1
TGFBR		group		1	0.99	0.00534	CD44,CDH11,NOX4,SNAI1
ZFAS1		other		0.132	0.131	0.00534	CDH2,MMP14,MMP16,NKD2
calcium chloride		chemical drug		1.154	1.141	0.00534	ENPP1,ID3,MMP2,TNFRSF11B
kukoamine A		chemical - endogenous non-mammalian		0.057	0.062	0.00534	BAX,BCL2,CDH2,CEBPB
mir-503		microrna		0.246	0.259	0.00534	BCL2,BMP6,FGF2,FGFR1
trientine		chemical drug		-0.781	-0.775	0.00534	IGFBP3,IGFBP4,IGFBP5,TGFB1
N-acetyl-L-cysteine		chemical drug		-1.227	-1.206	0.0054	AQP2,AR,BAX,BCL2,BNIP3,CCN2,CCND1,CTSK,DUSP6,ESM1,FGF2,GCK,GCLC,GLB1,HMOX1,IRAK1,MAPK14,MMP2,RUNX2,SLC2A4,SNAI1,SOD2,SPP1,TGFB1,TGFBR2,TNC,TP53,VCAM1
butyric acid		chemical - endogenous mammalian		0.94	0.936	0.00541	ALB,ANXA1,AR,ATP5MC3,BAX,BCL2,CCK,CCND1,CCNG1,CD44,CDH11,CDK5,CLCN3,CYCS,FSTL1,GAA,GADD45A,GATA3,GCLC,GRN,HSD17B1,HSPG2,IBSP,IGFBP3,IRS1,KLK3,MAD1L1,MPP3,MVP,NAMPT,NFATC4,NPM1,PDIA3,PFKL,PLAT,PTGS1,SGK1,SLC1A2,SPP1,TGFB1,TGFBR2,TGM1,TGM2,THBS4,TIMP1,TNFAIP2,TP53
CNOT3	0.078	other		-0.447	-0.437	0.00545	CPT1B,LEPR,MAD1L1,SOAT1,UCP2
EDNRA	0.017	transmembrane receptor		1.342	1.327	0.00545	MMP2,PTGS1,TGFB1,TIMP1,TIMP2
GAS2L3	-0.284	other		-0.447	-0.432	0.00545	CCNG1,F2R,LIF,PTPN14,TP53
NPFF	-0.133	other				0.00545	ACE,CEBPB,ID3,PIK3R1,SLC2A4
Sod		group		-1	-0.993	0.00545	DSC2,HMOX1,MMP2,TP53,VCAM1
fluoride		chemical - endogenous mammalian	Activated	2.213	2.198	0.00545	BAX,CA6,GADD45A,RUNX2,VCAM1
mir-218		microrna		-0.039	-0.027	0.00545	CDH2,LEF1,MDGA1,MMP24,SASH1
zinc protoporphyrin IX		chemical - endogenous mammalian		1.516	1.527	0.00545	CCND1,GCLC,HMOX1,MET,SOD2	CREBBP,ESR1,RB1,SP1,TAF4,TP53,zinc protoporphyrin IX
cocaine		chemical drug		-0.306	-0.324	0.00546	BCL2,CACNA2D1,CAMK2A,CASR,CDK5,EGR2,FGF2,GABRB3,GADD45A,HJV,IRS2,KCNC1,MAP2K6,NPTX2,OXT,PITPNA,PPP1R1B,PVALB,SLC16A10,SLC1A2,TAC1,Tpm1,Zfp948
imatinib		chemical drug		0.662	0.67	0.00557	APP,ATP1B2,ATP5MC3,ATP5PB,ATP6V1A,BAX,BCL2,CALR,CCND1,CEBPB,CITED2,CYC1,DAB2,ERP29,GADD45A,HMOX1,HSP90AB1,HSP90B1,ID1,JAK1,NDUFA12,NDUFA8,NDUFB2,NDUFB6,NDUFB8,NDUFC2,NPM1,PDIA3,PDIA4,PIK3R2,PPIF,RAB31,RAP1A,SLC20A1,TFRC,TGFB1,UQCRFS1
TGFBR1	-0.038	kinase		1.56	1.546	0.00557	BGN,CCN2,CCND1,COL1A2,EGR2,FBLN5,FGF9,HMOX1,LTBP1,PTX3,RGS3,RUNX1,SNAI1,TPSAB1/TPSB2	AHR,Akt,ESR1,NFkB (complex),P38 MAPK,PI3K (complex),PPARGC1A,RUNX2,SMAD7,SP1,TGFB1,TGFBR1,TP53,estrogen receptor
SREBF1	0.292	transcription regulator		1.432	1.411	0.0056	AK4,ALDOA,ALOX12,AR,BAX,BCL2,CEBPB,CYCS,DEPP1,FABP3,FADS1,GCK,GLB1,HK2,HMOX1,HSD17B1,IMMT,IRS2,KLK3,MDK,MYL1,RBP1,SERPINA1,SERPINA3,SLC20A1,SUCLG1,TGFB1,TNNI2,TP53,UCP2,UQCRFS1
DACH1	-0.135	transcription regulator		0.174	0.182	0.00562	FGF2,FGFR1,ID1,IGFBP3,KLK3,PLAT,STC2,TGFB1
Collagen type I (complex)		complex	Activated	2.59	2.577	0.00563	APP,BAX,CCND1,CDH2,F13A1,MMP14,MMP2,RUNX2,TGFB1,TIMP2,TNC,TP53	AHR,Akt,Collagen type I (complex),ERK,NFkB (complex),P38 MAPK,PPARGC1A,RUNX2,SP1,TP53,estrogen receptor
HNF1B		transcription regulator		-1.291	-1.293	0.00577	ACADVL,ACVR1,ALB,BGN,CD44,CITED2,EXT1,FZD1,ID1,ID3,IGFBP3,LUM,MAFB,MET,MMP2,SERPINA1,SLC29A1,SNAI1
estrogen receptor		group	Inhibited	-2.38	-2.378	0.00589	ANXA1,BAX,BCL2,CCN2,CCND1,CD44,CDH11,CNNM4,COL12A1,COL13A1,COL4A5,COL9A2,DSC2,FGF1,FGFR1,GAL,GATA3,IRS1,MMP14,MMP24,NEDD9,SNAI1,TGFB1,TGFBR2,TIMP1,TIMP2,TNC,TP53,TSC22D3	CREBBP,ERK,ESR1,ETV5,FOXM1,Hsp27,NFkB (complex),PI3K (complex),RB1,RUNX2,SP1,TAF4,TP53,YBX1,estrogen receptor
cytochalasin D		chemical toxicant		-0.186	-0.173	0.00598	AQP5,CCN2,COL2A1,ITGA11,MMP14,MMP16,MMP2,SOX6,TIMP2
ATPase		group				0.00602	CTSK,MMP14,VCAM1
BCAR3	-0.309	other				0.00602	CCND1,IRS1,RAP1A
CBR3-AS1		other				0.00602	CCND1,CDH2,TGFB1
CEL		enzyme				0.00602	BAX,CCND1,TP53
E4F1	0.124	transcription regulator				0.00602	DLAT,DLD,SLC25A19
GJA8		transporter				0.00602	CALR,IRS2,TRIB3
HJV	-0.616	other				0.00602	BMP6,ID1,SLC40A1
RBM14	-0.026	transcription regulator				0.00602	CCND1,HTRA1,SOX6
RYR1	-0.233	ion channel				0.00602	GAPDH,MB,MYH4
TIMP4	-0.086	other				0.00602	BCL2,MMP14,TIMP2
VCAM1	0.826	transmembrane receptor				0.00602	CCND1,CD44,VCAM1
ampelopsin		chemical drug				0.00602	BCL2,HMOX1,TP53
kremezin		chemical drug				0.00602	CITED2,HMOX1,KL
phenylamil		chemical reagent				0.00602	ID1,RUNX2,TRIB3
thioctic acid		chemical drug		-1	-0.991	0.00604	BAX,BCL2,CAT,HMOX1,MMP2,SOD2,TIMP2,TP53,UCP2,VCAM1
C1QA	-0.07	other		-0.388	-0.394	0.00611	CD163,CD44,F2R,LCN2,MAP2,SERPINA3,TIMP1
LLGL2	-0.092	other		1.134	1.116	0.00611	CCN2,CRIM1,FSTL1,HEXB,SGK1,SLIT2,TSPAN3
chrysotile asbestos		chemical toxicant	Activated	2.596	2.579	0.00611	CTSK,CTSZ,GCLC,HSP90B1,PDIA4,TIMP1,TP53	ERK,NFkB (complex),RUNX2,SP1,TP53,chrysotile asbestos,estrogen receptor
crocidolite asbestos		chemical toxicant		1.287	1.273	0.00611	CCND1,CD44,GADD45A,GCLC,LIF,MET,SPP1
mir-221		microrna		0.466	0.474	0.00611	CCN2,KLK3,MMP2,PIK3R1,TFAP2A,TGFBR2,TP53
1-methyl-4-phenylpyridinium		chemical toxicant		1.727	1.718	0.0062	BAX,CCND1,DDIT4,TFRC,TP53,TRIB3	1-methyl-4-phenylpyridinium,AHR,ESR1,NFkB (complex),PARP1,PPARGC1A,SP1,TP53,estrogen receptor
HOXA11	-0.028	transcription regulator		0.128	0.12	0.0062	ANXA1,CD47,CTSV,RUNX2,SIX2,SPP1
HSPA9	-0.042	other		0.128	0.117	0.0062	CRABP2,HOXD10,NEDD9,RET,SOD2,TP53
HTATIP2	0.997	transcription regulator				0.0062	CCND1,CDH2,MMP2,SNAI1,SPP1,TP53
IGFBP5	-0.488	other		1.056	1.051	0.0062	BAX,BCL2,CCND1,IRS1,RUNX2,TP53
SEMA7A	-0.135	transmembrane receptor		0.816	0.8	0.0062	BAX,CCN2,COL1A2,FGF2,TGFB1,TIMP1
CD 437		chemical drug		-0.131	-0.105	0.00633	ALDOA,ATP5F1A,ATP5MC3,ATP5PF,ATP5PO,BAX,CEBPB,EEF2,FLT3LG,GADD45A,ITGA11,NDUFB9,NPM1,PABPC1,PDIA3,PGAM1,RPL19,RPLP2,RPS10,RPS15,SLC38A7,TP53,TUBA1A,UGCG,UQCRC2
KLF2	0.203	transcription regulator		-0.332	-0.328	0.00633	ACE,APLN,AQP5,ASS1,CCN2,CD44,CDH2,FUT4,GADD45A,ID1,ID3,KCNN4,LEPR,MMP14,MVP,NOTCH2,PDPN,PLPP3,RGS3,RUNX2,TFRC,TGFB1,TIMP1,UGDH,VCAM1
isoproterenol		chemical drug	Activated	2.225	2.207	0.00643	ACE,APLN,APP,AQP4,AQP5,BCL2,CDK5,DIO2,FGF2,HMOX1,LIF,MMP2,NAMPT,NFATC4,PLAT,SOD2,TGFB1,TIMP1,TIMP2,TNXB,UCP2	ERK,ESR1,L-glutamic acid,NFkB (complex),P38 MAPK,PARP1,RB1,RUNX2,SMAD7,SP1,TGFB1,TP53,estrogen receptor,isoproterenol
ATF4	-0.087	transcription regulator	Activated	2.294	2.267	0.00644	ATF5,CA9,CALR,CEBPB,CPOX,CTH,DDIT4,GADD45A,HSP90B1,IBSP,IGFBP5,NOX4,PHGDH,PSAT1,PTX3,SARS1,SERPINF1,SLC3A2,SLC7A3,SOD2,STC2,TNFRSF11B,TRIB3
RARB	0.291	ligand-dependent nuclear receptor		-0.208	-0.217	0.00644	ASCL1,ATP6V0A4,CYP26A1,CYP26B1,GADD45A,GBP6,GJB4,ID1,ID3,IGFBP3,Iigp1,KLK3,MMP11,OXT,RET,SERPINA1,SLC17A9,SPP1,STRA6,TAC1,Tdh,TGFB1,TGM1
paraquat		chemical toxicant	Activated	2.301	2.285	0.00645	ADAM22,BAX,BNIP3,CAT,CCDC88A,CCN2,GCLC,HMOX1,LAMP2,LIFR,LRP4,Mt1,Mt2,PLCE1,TGFB1,TIMP1,TUSC1	AHR,NFkB (complex),PPARGC1A,SP1,TP53,estrogen receptor,paraquat
spironolactone		chemical drug		-0.283	-0.276	0.00646	ACE,AGTR2,ATP6AP2,BCL2,CCN2,COL1A2,EDNRB,FGF2,KL,SLC9A1,TGFB1,TIMP2
NRAS	-0.057	enzyme		1.705	1.717	0.00648	AK1,ANXA8/ANXA8L1,BAX,BCL2,CCND1,CCNG1,CKM,COL1A2,CRABP2,CRYBG1,DUSP6,GALE,HTRA1,Iigp1,IRX3,KCTD12,LCN2,MGP,NCAM1,NPR3,OSBPL1A,PTP4A3,PTX3,SERPINE2,SLC2A4,Tgtp1/Tgtp2	AHR,Akt,NFkB (complex),NRAS,PPARGC1A,RUNX2,SP1,TP53,estrogen receptor
CREBBP	0.131	transcription regulator	Inhibited	-2.655	-2.673	0.00656	ALAS1,AMHR2,AR,BCL2,CAMK2B,CCND1,CD44,CKM,COL1A2,COL2A1,CRIM1,CRISPLD2,EGR2,EYA2,FGF2,GM2A,GRIN2A,GRIN3B,GRN,HVCN1,KLK3,MAF,MBTPS1,MCF2L,MMP11,MYH1,PDGFRB,PLEKHF1,PPFIBP2,RGL1,RUNX2,SCN4B,SDC4,SERPINA3,SERPINE2,SLC1A2,SLC6A19,SPSB1,TAPBP,TLE6,TMEM38A,TNC,TNFAIP1,TUBA8,VCAM1	AHR,CREBBP,ESR1,MEF2C,NFkB (complex),PPARGC1A,RB1,SP1,TAF4,TP53,estrogen receptor
NRF1	0.041	transcription regulator		-0.45	-0.463	0.00683	ALAS1,CD47,CDH2,Cox5b,CYCS,ESM1,GCLC,HMOX1,Mt1,SNAI1,TP53
lomustine		chemical drug		-0.302	-0.32	0.00683	ANXA1,CD44,FCGR2A,FXYD5,ID1,LCN2,SPP1,TGIF1,TIMP1,Tpm1,TSPAN8
lovastatin		chemical drug		0.81	0.8	0.00685	ADAMTS1,ALB,AR,BCL2,CAT,CCN2,CCND1,ENC1,FGF9,FGFR1,GATA3,HMOX1,LIF,NOX4,PLAT,SDC4,TGFB1,TNFRSF11B,TP53
MSX2	1.596	transcription regulator		0.762	0.758	0.00685	AQP4,CCND1,CDH2,EGR2,IBSP,LEF1,SPP1,TP63
NORAD		other	Activated	2.121	2.102	0.00685	BASP1,CCN2,ID3,IGFBP3,IGFBP4,PPP1R13L,SGK1,SMTN
DETA-NONOate		chemical reagent		0.483	0.479	0.00707	BGN,CA9,CAT,CCND1,HMOX1,S100A8,TIMP1,TNFRSF11B,TP53,VCAM1
IGFBP2	0.311	other		0.799	0.783	0.00707	CADM1,CCND1,COL14A1,DDAH1,IGFBP3,IGFBP4,MMP2,NEDD9,POSTN,RBMS3
ROCK2	-0.006	kinase		2	1.987	0.00712	APP,CD44,DSC2,MAF,S100A8,SCEL,SPP1,TOB1,VCAM1
GDF2		growth factor		1.979	1.956	0.00718	CDH11,COL9A1,CRABP1,ENPP2,HTRA1,ID1,ID3,LYVE1,POSTN,RASL11B,SERPINE2,SERPINF1,SLC3A2,SPP1,VCAM1
LEF1	2.457	transcription regulator		-0.323	-0.338	0.00726	AR,ARHGAP20,BCL2,CAPN3,CCND1,CD44,CHCHD10,FGF18,GATA3,GEM,LEF1,MMP2,NCAM1,PHLDA1,PTGER2,RRAGD,RUNX2,SGK1,SPP1,TP53
ST1926		chemical drug		-1.594	-1.565	0.00726	ATP5F1A,ATP5PF,CEBPB,EEF2,ITGA11,NDUFB9,NPM1,PABPC1,PDIA3,RPL19,RPL41,RPS10,RPS15,RPS26,RPS27A,SLC38A7,SSTR3,TP53,UGCG,UQCRC2
CSF1	-0.167	cytokine		-0.43	-0.454	0.00728	APP,ARG1,BAX,BCL2,CCND1,CD163,CTSD,CTSK,EGR2,F2R,FCGR2A,GAB3,HK2,HSP90B1,Iigp1,JDP2,LDHA,MAFB,MMP16,NKIRAS1,PFKL,PIK3R2,RUNX1,SERPINE2,SLC16A3,SLC29A1,SPP1,TGFB1,TP53,TPI1,VCAM1
pioglitazone		chemical drug		0.78	0.778	0.00731	APP,BAX,BCL2,CAT,CCN2,CCND1,CITED2,CKM,FBP2,HMOX1,IRS1,IRS2,KLK3,LEPR,PFKL,PTGS1,RBP4,SLC2A4,SOAT1,SOD2,TGFB1,UCP2
ethanol		chemical - endogenous mammalian		0.951	0.937	0.00731	ANPEP,AQP4,BAX,BCL2,CAT,CCN2,CCND1,CEBPB,COL1A2,CREB3L3,DUSP6,EDNRB,ELOVL3,FGF2,GADD45A,GCK,GRIN2A,HMOX1,HSP90AB1,HSP90B1,HTATIP2,ID1,MAP2,MMP2,PLAT,PPP1R1B,PPP1R3C,RBP1,SERPINA1,SGK1,SLC1A2,SLC40A1,SNAI1,SOD2,SYNPO2,TGFB1,TIMP1,TIMP2,TP53,TRIB3,TSC22D3,VCAM1
TFAP2C	2.619	transcription regulator		-0.47	-0.465	0.00738	ADA,CCN2,CD44,F2R,IGFBP5,MAGI3,MMP14,MMP2,RET,SLC19A1,SOD2,TIMP1
TRAF3IP2	-0.233	other		1.391	1.369	0.00738	ACE,CCN2,FGF2,GATA3,IL33,LCN2,MMP2,POSTN,S100A8,TGFB1,TP63,VCAM1
DDR1	-0.079	kinase	Activated	2.194	2.187	0.00759	CDH2,MMP14,MMP2,TP53,VCAM1	Collagen type I (complex),DDR1,ERK,NFkB (complex),RUNX2,SP1,TP53,estrogen receptor
NREP	-0.621	other		-1.467	-1.472	0.00759	FGF2,MMP2,PDGFRB,TGFB1,TGFBR2
OMA1	-0.173	peptidase	Inhibited	-2.236	-2.241	0.00759	ACADVL,CPT1B,NDUFA9,OPA1,UQCRC2
SERTAD2	0.047	transcription regulator		0.555	0.57	0.00759	CAT,Cox8b,CPT1B,CYC1,DIO2
STK3	0.021	kinase		-0.277	-0.274	0.00759	CCN2,CCND1,PDPN,SPP1,WWTR1
taxifolin		chemical - endogenous non-mammalian		-1.067	-1.058	0.00759	APP,CAT,HMOX1,IBSP,SOD2
IGF2BP1		translation regulator		0.816	0.813	0.00763	CD44,COL14A1,COL1A2,CYFIP2,GADD45A,LUM,TNC
NFIA	0.296	transcription regulator		1.941	1.935	0.00763	CDH2,ELOVL3,MYH1,MYL1,NFIA,RUNX2,SLIT2
SN-38		chemical drug		-0.128	-0.137	0.00763	BAX,BCL2L2,BMP6,ESM1,HK2,NAMPT,TP53
PARP1	-0.199	enzyme	Inhibited	-2.088	-2.101	0.00771	BAX,BCL2,CCND1,GBP6,H19,HMOX1,Iigp1,KLK3,LIF,MMP2,NELL2,PEG10,PVALB,SNAI1,Tgtp1/Tgtp2,TIMP2,TP53,VCAM1	AHR,Akt,ERK,MAPK8,NFkB (complex),P38 MAPK,PARP1,PPARGC1A,RUNX2,SP1,TP53,estrogen receptor
(-)-isoproterenol		chemical drug				0.00782	CD44,MMP2
AN-207		chemical toxicant				0.00782	BAX,BCL2
Alp		group				0.00782	BCL2,LCN2
DPH1	0.029	other				0.00782	CCND1,EEF2
FKHR		group				0.00782	CCND1,VCAM1
Id		group				0.00782	ACTC1,CKM
L-tyrosine		chemical - endogenous mammalian				0.00782	BAX,BCL2
LARP1	0.043	translation regulator				0.00782	PABPC1,RPS6
LGALS2	-0.227	other				0.00782	BAX,BCL2
MARK4	0.157	kinase				0.00782	CCN2,SNAI1
MAT2B	-0.083	enzyme				0.00782	CCND1,HMOX1
MBNL3	0.877	other				0.00782	ABLIM1,CD44
MICU1	-0.054	other				0.00782	BCL2,CYCS
PATZ1	0.052	transcription regulator				0.00782	KLK3,TPSAB1/TPSB2
PCDH9	-0.46	other				0.00782	BAX,BCL2
PES1	0.019	other				0.00782	CCND1,HMOX1
PLIN3	-0.065	other				0.00782	BAX,BCL2
RAC3	0.472	enzyme				0.00782	CCND1,SNAI1
S29		chemical - kinase inhibitor				0.00782	BAX,BCL2
S7		chemical - kinase inhibitor				0.00782	BAX,BCL2
SB 559457		chemical reagent				0.00782	DDIT4,GAPDH
SCGN		other				0.00782	TAC1,TP53
SI163		chemical - kinase inhibitor				0.00782	BAX,BCL2
SSR180575		chemical drug				0.00782	BAX,BCL2
TOM1	-0.037	transporter				0.00782	APP,GRN
VNN1	-0.288	enzyme				0.00782	BCL2,TP53
VPS26A	-0.041	transporter				0.00782	APP,GUSB
XK469		chemical drug				0.00782	BAX,BCL2
ZBED1		enzyme				0.00782	RPL12,RPS6
ZMAT3	0.079	other				0.00782	BAX,TP53
bongkrekic acid		chemical toxicant				0.00782	CYCS,VCAM1
bucillamine		chemical drug				0.00782	BAX,BCL2
cerebrolysin		chemical drug				0.00782	BAX,BCL2
daphnoretin		chemical - endogenous non-mammalian				0.00782	BAX,BCL2
dicumarol		chemical drug				0.00782	Mt1,TP53
fosinopril		chemical drug				0.00782	ACE,KL
gentamicin C1		chemical drug				0.00782	CD44,SPP1
imisopasem manganese		chemical drug				0.00782	BAX,BCL2
isoalantolactone		chemical - endogenous non-mammalian				0.00782	BAX,BCL2
istradefylline		chemical drug				0.00782	PPP1R1B,TAC1
loganin		chemical - endogenous non-mammalian				0.00782	CCN2,NOX4
miR-758-5p (and other miRNAs w/seed GGUUGAC)		mature microrna				0.00782	AR,TP53
nitrosomethylurethane		chemical reagent				0.00782	CCND1,TP53
safflor yellow B		chemical - endogenous non-mammalian				0.00782	BAX,BCL2
swainsonine		chemical - endogenous non-mammalian				0.00782	BAX,BCL2
talipexole		chemical drug				0.00782	BCL2,TP53
xenon		chemical drug				0.00782	BCL2,TP53
3-deazaneplanocin		chemical drug		0.804	0.79	0.00787	ANXA8/ANXA8L1,CEBPB,HSD17B1,IGFBP3,KCNC4,MVP,NOTCH2,SLPI,SOX12,TGFB1,TSC22D3
RHOA	-0.072	enzyme		0.521	0.513	0.00794	BAX,BCL2,CCN2,CCND1,CEBPB,CTSD,IBSP,ITGBL1,MMP14,MYLPF,RUNX2,SDC2,TGFB1,VCAM1
CDK19	-0.156	kinase		-1.32	-1.305	0.00801	ACVR1B,BAX,CCNG1,CTSD,CYFIP2,DDIT4,GADD45A,HMOX1,IER5,LIF,PROCR,RPS12,TGFB1,TRIB3,VDR
FGFR1	0.302	kinase		-0.377	-0.392	0.00801	BAX,CCND1,EEF1A1,EIF3C,EIF4EBP2,FGF1,FGF2,FGF7,FGFR1,GRINA,HK2,LIF,MMP14,PTGS1,RPS6
Mapk		group		-0.513	-0.531	0.00801	ADA,APLN,APP,BCL2,CAT,CCND1,CEBPB,HMOX1,IRS1,PRKCZ,RUNX2,S100A8,SNAI1,SPP1,VCAM1
BMPER	0.128	other		-0.106	-0.097	0.00804	ACVR1,ACVRL1,ID1,MGP,RUNX2,VCAM1
BMPR1B	-0.41	kinase		-0.728	-0.74	0.00804	COL2A1,ID1,ID3,POSTN,RUNX2,SOX6
BMPR2	-0.109	kinase		-0.1	-0.109	0.00804	ID1,RUNX2,SNAI1,SPP1,TNFRSF11B,VCAM1
BTG2	-0.048	transcription regulator		0.085	0.086	0.00804	CAT,CCND1,HMOX1,NCAM1,NOX4,SOD2
MEF2		group				0.00804	CKM,CPT1B,MB,MYH1,MYH4,SLC2A4
PARPBP	-0.247	other		1.633	1.631	0.00804	AMD1,IDH3G,INMT,SPON1,TIMP1,TNC
GATA6	-0.567	transcription regulator	Activated	2.214	2.214	0.00806	ACTC1,AMHR2,AQP5,ARG1,ASCL1,ASPRV1,CALML4,CD163,CITED1,CRABP2,DAB2,DCBLD2,DLD,DLST,DPP4,Fcna,FGF2,LTBP1,LYVE1,NFIA,PGK1,PPP1R14A,RBPJL,SLPI,SUCLA2,TGFB1
4-hydroxytamoxifen		chemical drug		0.785	0.769	0.00817	ACTC1,BAX,BCL2,CCN2,CCND1,CEBPB,COL16A1,CTSD,DDIT4,EPHA1,FGFR1,GM2A,HOXD11,IGFBP3,MAPK14,MICOS10-NBL1/NBL1,NEDD9,POLD4,RBP4,SGK1,SLC25A4,TP53,VDR
JAG1	0.163	growth factor		1.405	1.389	0.00825	CCND1,DUSP6,PDGFRB,RNF128,RUNX2,SNAI1,SPP1,TGFB1,TNC,TP53
ursolic acid		chemical drug		0.863	0.873	0.00825	BAX,BCL2,CCND1,EIF3C,FGF2,MMP2,SARS1,SOD2,TP53,VCAM1
CDON	-0.087	other		0	0.005	0.00828	ACE,CCN2,COL4A3,MAPK14
L-serine		chemical - endogenous mammalian		-1.973	-1.968	0.00828	CCND1,PHGDH,PSAT1,TP53
LINC01139		other		-1	-1.013	0.00828	ALDOA,IGFBP3,LDHA,SLC16A3
UGDH	-0.3	enzyme				0.00828	BCAN,LIPG,TBX6,TNC
XPO1	-0.06	transporter				0.00828	CCND1,IGFBP3,MET,TP53
largazole		chemical - endogenous non-mammalian		1	1.011	0.00828	DPP4,FGF2,GAPDH,HK2
lithium		chemical drug		-1.518	-1.521	0.0084	APP,AQP2,BAX,BCL2,NCAM1,NPTX1,OXT,RET,SLC1A2,SYN1,TAC1,TP53	AHR,Akt,L-glutamic acid,NFkB (complex),PPARGC1A,RB1,RUNX2,SP1,TP53,estrogen receptor,lithium
GPX1	-0.094	enzyme	Inhibited	-2.177	-2.163	0.00843	BCL2,CAT,CCN2,COX4I2,GRN,NDUFB8,SOD2,UQCRC2,VCAM1	GPX1,NFkB (complex),SP1,TP53,reactive oxygen species
EDN1	0.235	cytokine		-0.064	-0.087	0.00854	ANXA1,APLN,BCL2,CCN2,CCND1,CDH2,COL1A2,COMP,CST3,CTNND1,EDNRB,FGF2,GRN,LEPR,MMP2,NPM1,PTGER2,PTGS1,RPSA,SLC1A2,TGM2,TIMP1,TNC,TP53,VCAM1
CNTF	-0.733	cytokine		0.518	0.514	0.00873	CISH,CNTFR,ENPP2,FGF2,FGFR1,IRS1,LIF,LIFR,PPP1R1B,SERPINA3,TAC1,TGFB1,TIMP1
SP3	-0.058	transcription regulator		-0.899	-0.91	0.0088	AEBP1,ALOX12,CCND1,CDH2,CHI3L1,CITED2,CNMD,COL1A2,COL2A1,CYP26A1,F2R,GLTP,HSD17B1,IGFBP3,MET,MMP2,PGK1,PROCR,PTGS1,SGK1,SLC19A1,SOD2,TGFBR2,TGM1,TIMP1,TIMP2,TNC,TP53
SRC	-0.067	kinase		0.019	0.007	0.00883	ACAT1,CCND1,CKM,COL1A2,CTNND1,CTSV,F2R,IBSP,ID1,KLK3,LAMP2,MMP2,PGK1,POSTN,SPP1,VCAM1
6-hydroxydopamine		chemical toxicant		1.914	1.902	0.00888	BAX,BCL2,BCL2L2,CALR,DDIT4,GADD45G,HSP90AB1,NCAM1,PDIA3,SOD2,TAC1,TIMP2,TP53,TRIB3	6-hydroxydopamine,AHR,ESR1,NFkB (complex),PARP1,PPARGC1A,SP1,TP53,estrogen receptor,testosterone
ATN1	0.007	transcription regulator				0.00897	ATP1B2,BASP1,CA4,Cd24a,CDH11,FGF1,IGFBP5,KCNA1,KCNAB2,LTBP2,Marcks,MAX,NPTX1,NREP,PVALB,SPP1,SPTBN2,ST8SIA5,VAMP1
EBF1	0.104	transcription regulator		-0.497	-0.513	0.00897	CEBPB,CRABP1,FBP2,GATA3,HK2,IRS1,LEF1,LNPEP,Ly6a (includes others),PFKP,PHKA1,PHKG1,PIK3R1,PIK3R2,POSTN,PPP1R3C,PRKAA2,PRKAG3,SLC2A4
trichloroethylene		chemical toxicant		-1.508	-1.509	0.00903	ANPEP,ATF5,BNIP3,CCNG1,CD47,CITED2,FBXO3,GSTO1,IGFBP3,NDUFS1,YWHAQ
wortmannin		chemical - kinase inhibitor		0.138	0.155	0.00917	ANPEP,AR,ARRB1,BAX,BCL2,CCN2,CCND1,CD44,COL1A2,F2R,GCK,GCLC,HMOX1,IRS1,IRS2,MAF,MMP14,MMP2,POSTN,RAP1A,TFRC,TP53,TP63,TPI1,VCAM1
docosahexaenoic acid		chemical drug	Inhibited	-2.139	-2.129	0.00929	APP,ARG1,BAX,BCL2,CCN2,CD44,CEBPB,CYCS,FADS1,HMOX1,LOXL1,MMP2,NOX4,PIK3R1,PLAT,PTGS1,TGFB1,TGFBR2,TIMP1,TIMP2,UCP2,VCAM1	AHR,Akt,IL1A,NFkB (complex),P38 MAPK,PPARGC1A,RUNX2,SP1,TP53,docosahexaenoic acid,estrogen receptor,reactive oxygen species
PAK1	-0.389	kinase		-0.216	-0.216	0.00941	BCL2,CCND1,CTNND1,CTSD,MAPK14,MMP14,TP53
ROR1	0.201	kinase		0.509	0.497	0.00941	CCN2,FSTL1,HEXB,MAP2,SGK1,SNAI1,TSPAN3
pentoxifylline		chemical drug		0.579	0.592	0.00941	ACE,CCN2,CCND1,POSTN,TGFB1,TIMP1,VCAM1
sulindac sulfide		chemical drug		0.508	0.51	0.00953	ADRA2C,APP,CCN2,CCND1,CEBPB,GADD45A,GADD45G,LDHA,MYOZ1,PGAM1,PIK3R1,STC2
IL2		cytokine		-0.452	-0.476	0.00972	ABCB4,ACVR1B,ADCY9,ANXA1,ARHGEF2,ARNT2,ATF5,BAX,BCL2,CCND1,CCNG1,CD28,CD44,CD47,CISH,CYCS,CYSLTR1,DLST,DPP4,DSG2,DUSP6,ENPP2,FGF2,FGF7,FGFR1,FGL2,FLT3LG,GADD45G,GAPDH,GATA3,GRN,HK2,HSP90B1,IGFBP4,JAK1,LIF,LIFR,LTBP3,Ly6a (includes others),MAF,MAP2K6,MMP2,NDUFA12,PDE4A,PDIA3,PHLDA1,PTGER2,PTPN3,RNF128,S100A8,SLC3A2,SPP1,STC2,STK17B,TFRC,TGFB1,TIMP1,TNFRSF11B,TP53,TPI1,TRIB3,WLS
3,4,5,3',4'-pentachlorobiphenyl		chemical toxicant	Activated	2.032	2.022	0.00981	CAT,CCK,CD44,Cox8b,CTSD,CYCS,EPB41L3,FGF9,GADD45A,GRHPR,IGFBP3,PTGFR,TNC
USF1	0.081	transcription regulator		1.392	1.381	0.00981	APLN,BAX,CAT,CHI3L1,CPT1B,GATA3,IGFBP3,Mt1,SLC19A1,SPP1,TGFB1,TP53,UCP2
ERBB4	0.234	kinase		-1.958	-1.959	0.00992	CADM1,CCND1,FGF7,GADD45A,HMOX1,IGFBP4,IGFBP5,PGK1,SERPINA3,SERPINE2,SLPI,TNC,TP53,WWP1	AHR,ERBB4,FOXM1,NFkB (complex),PPARGC1A,RB1,SP1,TP53,YBX1,estrogen receptor
Cdc42	-0.082	enzyme	Activated	2.121	2.117	0.00992	ATP6V1A,CTSA,CTSD,CTSV,CTSZ,FGF2,LAMP2,LIF
ILK	-0.188	kinase		-0.312	-0.324	0.00992	AQP2,BCL2,CCND1,CD44,LEF1,MMP2,SNAI1,TGFB1
EP300	-0.059	transcription regulator		0.326	0.305	0.0102	AMHR2,AQP5,AR,BAX,CAMK2B,CCND1,CKM,COL1A2,COL2A1,CRABP2,CRIM1,CRISPLD2,EGR2,EPHB2,Esrra,EYA2,GATA3,GM2A,HMOX1,HSP90AB1,HVCN1,ID1,ID3,KLK3,LDHA,MAF,MBTPS1,MCF2L,MMP11,PDGFRB,PLEKHF1,PPFIBP2,RBP1,RGL1,RUNX2,SCN4B,SDC4,SLC6A19,SOD2,SPSB1,TGFBR2,TLE6,TMEM38A,TNC,TNFAIP1,TP53,TUBA8
CASR	-1.19	g-protein coupled receptor		-0.857	-0.875	0.0102	BAX,BCL2,CASR,CCND1,CD44,CISH,GADD45A,GADD45G,GATA3,ID1,IGFBP3,IGFBP5,NDUFV2,NEDD9,S100A8,SERPINA1,SERPINB6,SSX2IP,UCP2,VDR
BAG1	0.053	other		-1.114	-1.12	0.0102	BCL2,CCND1,GADD45A,GRN,KLK3,UAP1
FGF9	0.347	growth factor		1.664	1.648	0.0102	BAX,CCND1,FGF7,GCLC,HMOX1,RUNX2	Akt,FGF9,NFkB (complex),PPARGC1A,RUNX2,SP1,TP53
GRN	0.326	growth factor				0.0102	APP,BCL2,CCND1,CTSD,CTSZ,GRN
diazoxide		chemical drug		-0.625	-0.619	0.0102	ABCC9,BAX,BCL2,CYCS,SLC39A7,UCP2
14,15-epoxyeicosatrienoic acid		chemical - endogenous mammalian		0.156	0.153	0.0102	CD44,CTSK,FGF2,PLAT,TNFRSF11B
SIM2	0.006	transcription regulator		0.071	0.074	0.0102	BNIP3,CDH2,GADD45A,MMP2,TIMP2
Smad2/3-Smad4		complex		-1.342	-1.355	0.0102	BCL2,COL1A2,IGFBP3,IGFBP5,SNAI1
acetyl-L-carnitine		chemical - endogenous mammalian		-0.447	-0.46	0.0102	BAX,COX4I2,GADD45A,NDUFB8,UQCRC2
antimycin A		chemical - endogenous non-mammalian				0.0102	BCL2,CPT1B,SOD2,TIMP1,TIMP2
batimastat		chemical - protease inhibitor		0.447	0.446	0.0102	CEBPB,FGF2,MMP14,MMP2,SDC4
ethidium		chemical drug				0.0102	BCL2,CCN2,CCND1,TIMP1,TIMP2
nickel		chemical toxicant		-1	-1.008	0.0102	FGF2,GAPDH,Mt1,PLAT,UGCG
vitamin K2		chemical drug		1.231	1.218	0.0102	AR,MATN2,MGP,SPP1,TNFRSF11B
gefitinib		chemical drug		1.246	1.25	0.0103	ADAMTS1,BCL2,CCND1,CDH2,CEBPB,CTSA,CYP2F1,FGF18,FRAT2,HMOX1,HSP90B1,ID1,IGFBP5,LIFR,MAP2K6,MMP11,NOX4,NRP2,OIT3,PF4,SLC20A1,SLPI,TIMP2
mir-15		microrna		0.951	0.96	0.0103	APP,AR,BCL2,BCL2L2,CCND1,FGF1,FGF2,TFAP4,TIMP1,TP53,UCP2
silibinin		chemical drug		0.229	0.244	0.0103	BAX,CCN2,CCND1,CD44,CDH2,IGFBP3,KLK3,MMP2,SNAI1,TIMP2,TP53
sodium arsenite		chemical drug		1.826	1.819	0.0103	BAX,BCL2,CCND1,CISH,GADD45A,GCLC,HK2,HMOX1,LITAF,SLC2A4,TP53	AHR,ERK,ESR1,IKBKB,MAPK8,NFkB (complex),PARP1,PPARGC1A,RB1,RUNX2,SP1,TP53,estrogen receptor,sodium arsenite
sodium chloride		chemical - endogenous mammalian		1.371	1.353	0.0103	ACE,AGTR2,AQP2,CCN2,DDIT4,HMOX1,NOX4,OXT,SLC5A3,SPP1,TGFB1
triamterene		chemical drug		-0.282	-0.302	0.0103	ADAMTS1,ANXA1,CD44,FCGR2A,FXYD5,LCN2,SPP1,TGIF1,TIMP1,Tpm1,TSPAN8
IL3		cytokine		0.414	0.395	0.0106	ADA,ARG1,ATF5,BCL2,Calm1 (includes others),CALR,CAT,CCND1,CCNG1,CISH,CITED2,EEF1A1,EGR2,F2R,FCGR2A,FGFR1,GADD45A,GADD45G,HK2,HSP90B1,IL33,LCN2,LIF,Mt1,NEDD9,PDPN,PFKL,PHGDH,Rpl29 (includes others),RPL4,RPS12,RPS19,RPS4Y1,RPS6,SERPINA3,SLC3A2,TPSAB1/TPSB2,UCP2,VCAM1
NGF	0.287	growth factor		1.241	1.223	0.0107	APP,ASCL1,BAX,BCL2,CCND1,DPYSL5,DUSP6,EEF1A1,EGR2,GADD45A,GAL,GRIN2A,HMOX1,ID1,KLK3,LIFR,LRP1,MAP2,MAPK14,MMP2,RACK1,RET,SLC40A1,TAC1,TFAP2A,TGFB1
calcimycin		chemical reagent		-0.491	-0.507	0.0108	ACE,AMD1,APP,AR,CALR,CASR,CYCS,DDIT4,FGF2,HSD17B1,HSP90B1,ID3,LCN2,MYH1,SYN1,TP53
MAP2K6	-0.871	kinase		-0.106	-0.114	0.0108	BAX,BCL2,BGN,CCND1,CKM,IRS1,IRS2,MMP2,MYH1,SLC2A4,SNAI1,VDR
MEF2D	-0.068	transcription regulator		1.066	1.055	0.0108	BCL2L2,CCN2,CCND1,CKM,COL1A2,EGR2,GCLC,HMOX1,MCM6,SLC2A4,SOD2,TGFB1
potassium chloride		chemical drug		-0.342	-0.353	0.0109	CALR,EGR2,FGF9,GRIN2A,HSP90B1,ID1,ID3,IGFBP5,NPTX1,PDIA3,PDIA4,PIK3R1,SLC7A3,SLC8A3,SPP1
BIRC5	0.148	other		0.635	0.631	0.011	BAX,BCL2,BGN,CCN2,FBN1,FLT3LG,LUM,MMP2,TP53,TP63
ADCY5	-0.39	enzyme				0.0113	ADCY7,ADCY9,BCL2
ATP2B2	-0.029	transporter				0.0113	BAX,BCL2,CALR
ATP6AP2	0.223	transporter				0.0113	ATP6AP2,NOX4,TGFB1
CYP4A11		enzyme				0.0113	ACE,S100A8,SGK1
F Actin		complex				0.0113	CCN2,CTSV,MMP2
FBLN5	0.796	other				0.0113	MMP2,SERPINA1,TGFB1
HOXD8	0.377	transcription regulator				0.0113	HOXD10,HOXD8,HOXD9
HOXD9	0.387	transcription regulator				0.0113	HOXD10,HOXD11,HOXD9
LDHB	0.174	enzyme				0.0113	ATP5F1A,CYCS,MB
N-Ac-leucyl-leucyl-methioninal		chemical - protease inhibitor				0.0113	BAX,HSP90B1,TP53
N1,N11-diethylnorspermine		chemical drug				0.0113	CCND1,SMOX,TP53
OXTR	-0.583	g-protein coupled receptor				0.0113	IBSP,PRKCZ,RUNX2
RASSF3	-0.134	other				0.0113	BAX,BCL2,TP53
Retinoic acid-RAR-RXR		complex				0.0113	CRABP2,IGFBP3,RBP1
SCGB3A2		other				0.0113	CTSD,MMP14,MMP2
SERPINA3	-1.64	other				0.0113	APP,CCN2,NOX4
SLC5A8		transporter				0.0113	BAX,BCL2,TP53
SOX15		transcription regulator				0.0113	CCN2,CKM,Hrc
TRPC3	0.239	ion channel				0.0113	CCND1,JPH1,VCAM1
butylidenephthalide		chemical reagent				0.0113	CDH2,MMP2,SNAI1
icariin		chemical drug				0.0113	ADCY9,COL1A2,RUNX2
FOXA2		transcription regulator		-0.511	-0.521	0.0114	ABCB4,ACTC1,ALAS1,ALB,CCND1,CHI3L1,CYP26A1,DDIT4,GAL,GCK,GFRA4,GPRC5C,H19,HK2,IGFBP5,IL33,MLF1,Mt1,NPTX2,PDGFRB,PPP1R14A,PPP1R14C,SERPINA1,SLC2A4,SNAI1,SPSB1,TGFB1,THBS3,UCP2
Growth hormone		group		-0.141	-0.154	0.0114	ALB,APLP1,BCL2,CAT,CCND1,CEBPB,CISH,CITED2,CTH,CUZD1,DDT,GCLC,IBSP,ID1,IGFBP3,IGFBP5,LEPR,NAMPT,NEDD9,NOX4,PLAAT3,SGK1,SPP1,TGFBR2,TUBA1A,UGDH
DRD2		g-protein coupled receptor		0.948	0.944	0.0115	BAX,EDNRB,IGFBP3,PVALB,TAC1,TGFB1,TGFBR2
EZR	0.158	other		-0.649	-0.65	0.0115	BAX,BCL2,CDH2,DDIT4,MMP14,MMP2,TRIB3
ITGAV	-0.058	transmembrane receptor		0.092	0.08	0.0115	BAX,BCL2,COL1A2,MMP2,RUNX2,TGFB1,TIMP1
SMAD5	0.052	transcription regulator		-0.13	-0.138	0.0115	CCN2,COCH,ID1,ID3,RUNX1,RUNX2,VCAM1
ZBED6		transcription regulator		-0.488	-0.476	0.0115	COL13A1,CRIM1,DDIT4,GCK,PMEPA1,SGK1,WWTR1
eplerenone		chemical drug		-1.937	-1.924	0.0115	ACE,CCN2,MMP2,NOX4,SPP1,TGFB1,VCAM1
mercuric chloride		chemical toxicant		1.281	1.278	0.0115	CDH2,GADD45A,GCLC,HMOX1,Mt1,Mt2,SPP1
LTBR	0.015	transmembrane receptor		0.453	0.441	0.0116	COCH,DSC3,DSG2,ENPP2,PDGFRB,PDPN,SERPINA1,Trim30a/Trim30d,VCAM1
Rock		group		0.97	0.962	0.0116	APP,CCN2,CCND1,IBSP,MYLPF,RUNX2,SPP1,TGFB1,VCAM1
seocalcitol		chemical drug	Activated	2.086	2.071	0.0117	BCL2,ERG,GADD45A,IGFBP5,LRP1,PDGFRB,RAB1A,SGK1,TFAP4,TSPAN6,VDR
Hsp27		group	Inhibited	-2	-1.998	0.0118	BAX,BCL2,CCND1,CD163,KLK3,NOX4,PPP1R1B,TGFB1	AHR,Akt,Hsp27,IKBKB,MAPK8,NFkB (complex),P38 MAPK,PPARGC1A,RB1,RUNX2,SP1,TP53,estrogen receptor
ibuprofen		chemical drug		0.872	0.88	0.0118	APP,AQP2,CCND1,COL12A1,EDNRB,MMP2,PTGS1,SERPINA3
temozolomide		chemical drug		1.483	1.483	0.0118	BAX,BCL2,ID1,MMP14,MMP2,SOD2,TP53,TP63
propylthiouracil		chemical drug				0.0118	AQP4,ART3,CS,DIO2,ELOVL3,FADS1,GAS2,Ly6a (includes others),NNMT,NSMF,PCOLCE2,PHLDA1,ROBO1,SLC16A10,SLC1A2,TUBA8
Z-LLL-CHO		chemical - protease inhibitor		0.086	0.066	0.0119	APP,AR,BAX,BCL2,CAMK2A,CASR,CAT,CCN2,CCND1,CCNG1,CEBPB,CISH,FGF2,HMOX1,HSP90B1,IRS1,IRS2,KCNH2,KLK3,MAD1L1,MLH1,MMP11,MMP14,MMP2,NOX4,PRKAA2,PTGFR,RAB10,RPLP2,RUNX2,SGCA,SLC2A4,SNAI1,SOD2,TIMP1,TP53,VCAM1,VDR
AGN194204		chemical drug		-0.126	-0.148	0.0121	ANGPTL7,ANXA11,ASS1,Cd24a,CRABP2,CRYBG1,CST3,CYP26B1,ELOVL3,ENO3,EPB41,Foxp1,GADD45A,GAPDH,GATA3,HK2,IL33,IRS2,KRT80,LIFR,PARM1,PHLDA1,RCAN2,S1PR3,SLC3A2,SPP1,STRA6,Tgtp1/Tgtp2,TIMP1
ACO1	-0.018	enzyme				0.0121	APP,GAPDH,IGFBP3,TFRC
AK1	-0.645	kinase				0.0121	AK1,ENO3,GAPDH,LDHA
CLCA2	-0.478	ion channel		0	-0.004	0.0121	CDH2,GRN,SNAI1,TP53
GADD45B	-0.072	other				0.0121	BCL2,BGN,TGFB1,TP53
GALNT6	0.262	enzyme		0	0.001	0.0121	ANPEP,CDH2,DPP4,EPHB2
MFN2	-0.317	enzyme				0.0121	BAX,BCL2,BNIP3,SLC2A4
PPP3CB	-0.239	phosphatase		1.213	1.217	0.0121	GADD45A,NOX4,RUNX1,TP53
androstenediol		chemical - endogenous mammalian		-1.195	-1.208	0.0121	AR,BAX,BCL2,KLK3
pargyline		chemical drug				0.0121	AR,GATA3,MAP2,PVALB
trestolone		chemical drug				0.0121	AR,BCL2,CCNG1,LIFR
PKD1	0.159	ion channel	Inhibited	-2.054	-2.048	0.0121	ABCB4,ADAM22,ADCY7,APOO,AQP2,ASPH,ATP1B2,CCN2,COL12A1,EDIL3,EMILIN1,FGFR1,Foxp2,GPRASP1,GREM1,JPH2,KLK3,LTBP1,NEDD9,NNMT,PVALB,RGS3,RUNX2,SOX6,TNFRSF11B
curcumin		chemical drug		-0.62	-0.606	0.0124	APP,AQP4,AR,ATP1B2,ATP6AP2,BAX,BCL2,CCN2,CCND1,CD44,CEBPB,COL1A2,FGF2,HMOX1,HSP90B1,IGFBP4,IGFBP5,IRS1,KCNB1,MLH1,MMP14,MMP2,NAMPT,NCAM1,NOTCH2,PDGFRB,RUNX2,SLC2A4,SLC37A4,TFRC,TGFBR2,TOB1,TP53,TSC22D3,UCP2,VCAM1
CSF3		cytokine		0.844	0.835	0.0126	ARG1,BAX,BCL2,CD44,CEBPB,CISH,CST3,CTSD,DUSP6,EGR2,ENPP2,GADD45A,GADD45G,HMOX1,LCN2,Ly6a (includes others),MET,MMP2,TFRC,TGFB1,TP53,VCAM1
MAPK8	-0.275	kinase		1.519	1.509	0.0126	BCL2,CAT,CCN2,CCND1,CDH2,CEBPB,DIO2,DUSP6,GADD45A,GCK,HMOX1,LIF,MMP2,MVP,NOX4,PTX3,RBP1,SOD2,TAC1,TP53,TSC22D3,VDR	AHR,Akt,ERK,MAPK8,NFkB (complex),P38 MAPK,PPARGC1A,RUNX2,SP1,TP53,estrogen receptor,reactive oxygen species
SP600125		chemical - kinase inhibitor	Inhibited	-3.315	-3.304	0.0126	ATP6AP2,BAX,BBOX1,BCL2,BCL2L2,CA4,CCN2,CCND1,Cd24a,CD44,CEBPB,CPT1B,CREB3L2,DDIT4,DSG2,FGF1,FLRT3,GADD45A,H2BC7,HMOX1,IRS1,MAFB,NEDD9,OSBPL6,PDGFRB,POLI,POSTN,PTX3,SOD2,SPP1,TGFB1,TP53,TRIB3,VCAM1,VDR	AHR,Akt,IKBKB,MAPK8,NFkB (complex),P38 MAPK,PPARGC1A,RB1,RUNX2,SP1,SP600125,TP53,estrogen receptor
CLOCK	-0.233	transcription regulator		-1.069	-1.067	0.0126	AHNAK2,AK4,APP,ARNT2,CADM2,CCN2,CCND1,CHST3,CRISPLD1,CYP26A1,F2R,FGF1,GADD45A,GCK,Gm12854/S100a11,ID1,IGFBP5,KCNS1,KIAA0100,LYPD6,MBTPS1,MGP,MOXD1,PDGFRB,PPIF,PTPN14,SCN4B,SLC1A2,SLC20A1,TNFAIP1,Trim30a/Trim30d
CD247	0.44	transmembrane receptor		-0.508	-0.526	0.0127	ALAS1,CLCN1,COL4A5,DNASE1L2,EDIL3,FCGR2A,NDUFB6,PLA2G5,SPOP,SYT7
phenylbutazone		chemical drug		-0.089	-0.105	0.0127	ADAMTS1,ANXA1,CCND1,CD44,FCGR2A,FXYD5,LCN2,SPP1,TIMP1,TSPAN8
PD 123319		chemical drug		-0.424	-0.424	0.0128	AGTR2,BAX,RET,SPP1,TGFB1,TIMP1
POLG	0.043	enzyme				0.0128	EEF1B2,RACK1,RPL27A,RPS19,RPS27A,RPS5
ferulic acid		chemical - endogenous non-mammalian		-0.625	-0.618	0.0128	APP,BCL2,CAT,HMOX1,PVALB,TIMP1
indomethacin		chemical drug		0.363	0.354	0.0129	ADAMTS1,ANXA1,APP,BAX,CCND1,CD44,CEBPB,CTSD,FCGR2A,FGF18,FGF2,FGF7,FXYD5,HMOX1,LCN2,LIMA1,MMP14,MMP2,OXT,PTGS1,S100A8,SPP1,TGIF1,TIMP1,TSPAN8,UAP1,UCP2,VDR
NFkB (complex)		complex		-1.509	-1.544	0.013	ADRA2C,APP,AQP5,ATP6AP2,BAX,BCL2,BCL2L2,CCK,CCN2,CCND1,Cd24a,CD44,CEBPB,CITED4,COL1A2,COL2A1,EDNRB,ELL2,ENPP1,FGF1,FGF2,GADD45A,GATA3,GCLC,HMOX1,LAMP2,LCN2,LIF,LITAF,MEOX1,MMP2,NAMPT,NCAM1,P2RY2,PPIF,PTX3,RUNX1,SDC4,SERPINA3,SLC16A3,SLC1A2,SLC2A4,SLC37A4,SLIT2,SLPI,SOAT1,SOD2,SPP1,TAC1,TFRC,TGFB1,TGM2,TIMP1,TIMP2,TNFAIP2,TNFRSF11B,TP53,TRIB3,VCAM1	CREBBP,ESR1,IKBKB,MAPK8,NFkB (complex),PI3K (complex),RB1,RUNX2,SMAD7,SP1,TAF4,TGFB1,TP53,estrogen receptor
kainic acid		chemical toxicant		1.342	1.322	0.013	APP,BAX,BCL2,CACNA2D1,CCND1,CEBPB,EGR2,FGF2,FGF9,GRIK4,GRIK5,LCN2,LMO1,NCAM1,NPTX2,RET,SPP1,SYT10,TIMP1,TP53
NRG2	0.455	growth factor				0.0133	BCL2,BNIP3,CCN2,EEF1A1,GDF5,HK2,HMOX1,LIFR,PHKG1,ROM1,SGSH
bromobenzene		chemical toxicant		1.124	1.123	0.0133	CTSV,GADD45A,GAPDH,GCLC,HMOX1,Mt1,Mt2,RPL35,TIMP1,TUBA1A,YWHAQ
methamphetamine		chemical drug	Activated	2.809	2.802	0.0133	BAX,BCL2,COX4I2,HMOX1,MMP2,NDUFB8,SLC1A2,TAC1,TIMP2,UQCRC2,VCAM1	ERK,ESR1,L-glutamic acid,NFkB (complex),PARP1,RB1,RUNX2,SP1,TP53,estrogen receptor,methamphetamine,reactive oxygen species
tyrphostin AG 1478		chemical - kinase inhibitor		-0.823	-0.807	0.0133	ACE,CCND1,FAP,FBN1,GFPT1,MMP2,PTGER2,RUNX1,RUNX2,S1PR3,VCAM1
resveratrol		chemical drug		0.471	0.476	0.0134	APP,AR,BAX,BCL2,CCND1,CD163,COX4I2,CS,CTSK,EPHA1,GCK,GLB1,HMOX1,IGFBP3,KLK3,LITAF,MAPK14,MMP2,NDUFB8,PRKAA2,SOD2,SPP1,TFRC,TGFB1,TGM1,TNFRSF11B,TNMD,TP53,UQCRC2,VCAM1,VDR
IKZF3		transcription regulator	Inhibited	-2.353	-2.337	0.0134	ANTXR1,BCL2,BCL2L2,CITED2,DEPP1,LHFPL2,MAN1C1,MAP2,SPSB1
LRP6	0.084	transmembrane receptor		-0.801	-0.802	0.0134	APP,CCND1,GATA3,HK2,LEPR,MMP14,MMP2,TGFB1,TTYH1
carbonyl cyanide m-chlorophenyl hydrazone		chemical toxicant		-0.647	-0.664	0.0134	BMP6,CTSV,DDIT4,ESM1,HK2,LCN2,NAMPT,PHLDA1,TGFB1
HNRNPU	-0.01	transporter				0.0135	ASCL1,BAX,GAPDH,SPP1,VCAM1
ITGA6	-0.125	transmembrane receptor		0.664	0.653	0.0135	BAX,BCL2,ENPP2,RPSA,TP53
Rp-cAMPS		chemical - kinase inhibitor		0.2	0.201	0.0135	BCL2,HMOX1,MMP14,RBP1,SPP1
YWHAZ	-0.011	enzyme		-1.969	-1.967	0.0135	AQP2,CTSK,HSP90B1,TP53,TSC22D3
beta-glycerophosphoric acid		chemical - endogenous mammalian		1.96	1.95	0.0135	MGP,RUNX2,SLC20A1,SPP1,TNFRSF11B	RUNX2,beta-glycerophosphoric acid
miR-503-5p (miRNAs w/seed AGCAGCG)		mature microrna		0.562	0.576	0.0135	BMP6,CCND1,CDC14A,FGF2,FGFR1
RAS		group		0.531	0.518	0.0137	ANPEP,ARHGEF2,BCL2,BNIP3,CCK,CCN2,CCND1,HMOX1,LIF,MET,MMP2,NPM1,SERPINE2,SNAI1,SOD2,TGM2,TP53
CAB39L	-0.389	kinase	Inhibited	-2.646	-2.663	0.0139	ATP5MC3,NDUFA12,NDUFB2,NDUFB8,NDUFB9,NDUFS4,NDUFV2
HOXC8	0.127	transcription regulator		-1.941	-1.942	0.0139	APP,ASS1,CDH11,Ly6a (includes others),SERPINF1,SLC16A3,SPP1
IFRD1	0.081	other		-1.937	-1.929	0.0139	CCN2,CRABP2,CTH,CTSZ,FEM1A,SPP1,SYN1
Rar		group		0.391	0.381	0.0139	ARG1,BCL2,GAS2,MGP,MMP11,SERPINF1,TGM2
RBM5	0.084	other		-1.488	-1.478	0.0139	ANXA1,ATP5MC3,BCL2,MLH1,NDUFV2,RAB1A,TSPAN6,UCP2
Wnt		group		-0.388	-0.398	0.0139	CD44,CDH2,GATA3,LEF1,RUNX2,SDC2,SNAI1,TFAP2A
pimagedine		chemical drug		-0.594	-0.588	0.0139	ALB,BAX,BCL2,CCN2,GCK,HMOX1,OPA1,TGFB1
H89		chemical - kinase inhibitor		-0.043	-0.022	0.014	ACE,ANXA1,APP,AQP5,BAX,BCL2,CCND1,CEBPB,COL2A1,EGR2,FGF2,HMOX1,IBSP,IGFBP5,MMP2,RUNX1,S100A8,SOD2,UCP2,VCAM1
L-glutamic acid		chemical - endogenous mammalian		1.564	1.551	0.0142	APP,BAX,BCL2,CCND1,CDH2,FADS1,FGF2,GRIN2A,HEXA,Kcnn2,MAP2,MMP2,RUNX2,SLC1A2,TIMP1,TP53	AHR,Akt,ERK,L-glutamic acid,NFkB (complex),P38 MAPK,PPARGC1A,RUNX2,SP1,TP53,estrogen receptor
bisindolylmaleimide I		chemical - kinase inhibitor		0.259	0.281	0.0142	ACE,BCL2,CCN2,CD44,FGF2,HMOX1,HSP90AB1,IBSP,ID3,KCNC1,KLK3,MET,MMP2,Mt1,SNAI1,SOD2
Ngf		group		1.993	1.98	0.0145	AGTR2,APP,BCL2,CCND1,FGF2,FGFR1,MAP2,NCAM1,TAC1,TP53	AHR,CREBBP,ERK,ESR1,MAPK8,NFkB (complex),Ngf,PI3K (complex),PPARGC1A,RB1,RUNX2,SP1,TAF4,TP53,estrogen receptor
Ca2+		chemical - endogenous mammalian		0.319	0.299	0.0145	APP,AQP5,AR,BCL2,CALR,CASR,CCK,CCND1,CEBPB,COL2A1,ENPP1,FGF2,ID1,ID3,IL33,IRS2,KCNG1,MGP,RUNX2,S100A8,SGK1,SPP1,TAC1,TGFB1,TGM1,TIMP2,UGCG,VCAM1,VDR
cyclic AMP		chemical - endogenous mammalian		0.715	0.691	0.0145	ANTXR1,APP,AQP2,ARG1,ASS1,BCL2,CCN2,CCND1,CDH2,CDK5,CEBPB,CYCS,EGR2,FGF2,GABRB3,GATA3,GCK,IGFBP3,IGFBP4,IGFBP5,IL33,KCNA1,PPP1R1B,PTGER2,RBP4,SLC37A4,SOD2,TIMP1,TP53
AR	-0.295	ligand-dependent nuclear receptor		0.914	0.891	0.0146	ACPP,AMD1,AMHR2,AR,ARG1,BASP1,BPGM,CA4,CAMK2A,CCND1,CDH11,CDH2,CDK14,CEBPB,CLCN1,CYC1,DDIT4,DDT,DEGS1,DSC2,DSG2,EDNRB,ESPN,FGF7,GUSB,IGFBP3,IGFBP5,KCNA1,KCNH2,KLK3,LRATD1,LRRK1,Ly6a (includes others),Marcks,MYOM1,PCBD1,PLAT,PMEPA1,PTGS1,S1PR3,SCEL,SCN4A,SERPINA3,SGK1,SMTN,SNAI1,SPP1,TGFB1,TGFBR2,TIMP2,TNFAIP2,TP63,TSPAN8,UNC5C
RGS2	-0.114	enzyme		1.291	1.305	0.0147	CTSA,ERP29,GAPDH,GRINA,HEXB,HSP90B1,IGFBP3,PDIA4,PLAT,RAB31,SLC16A3,SPP1,UGCG,VAMP7,Vnn3
DSCAML1		other		1.604	1.592	0.015	ARHGAP33,BMP6,DCLK1,GADD45G,GRIN3B,ID3,KCNA1,MAP2,PCDHB2,RACK1,ROBO2,SOX6,SRGAP3,TAC1
DKK1		growth factor		-1.244	-1.231	0.015	APP,BMP6,CCND1,CD44,EPHB2,FGF2,GATA3,LEF1,RUNX2,TP53,TTYH1
NR0B2		ligand-dependent nuclear receptor		0.336	0.35	0.015	ABCB4,ARG1,CCN2,CD163,COL1A2,GCK,PDIA3,PDIA4,SPP1,TGFB1,TIMP1
fenamic acid		chemical reagent		-0.183	-0.201	0.015	ADAMTS1,ANXA1,CD44,FCGR2A,FXYD5,LCN2,SPP1,TGIF1,TIMP1,Tpm1,TSPAN8
1-methyl-4-phenyl-1,2,3,6-tetrahydropyridine		chemical toxicant		1.593	1.583	0.0153	APP,BAX,BCL2,CDK5,FGF2,HMOX1,LIF,MAP2,PVALB,SLC40A1,SOD2,TP53	1-methyl-4-phenyl-1,2,3,6-tetrahydropyridine,AHR,Akt,MAPK8,NFkB (complex),P38 MAPK,PPARGC1A,RUNX2,SP1,TP53,estrogen receptor
MYOCD	-0.203	transcription regulator		-1.755	-1.765	0.0153	ACTC1,CCBE1,CLSTN2,COL1A2,COL2A1,ECM2,FAP,GJA5,MMP27,MYLPF,PHKA1,TP53
norepinephrine		chemical - endogenous mammalian		1.351	1.335	0.0154	APP,Cbarp,CCN2,Cd24a,CEBPB,CITED4,COL1A2,DIO2,ELOVL3,FGF2,GEM,GRID2,HMOX1,ID1,IRS2,MMP2,RBP4,SGK1,SLC2A4,TFRC,TGFB1
LPL	-0.124	enzyme		-1.331	-1.335	0.0155	BCL2,FABP3,IRS1,IRS2,PRKAA2,SLC2A4,TGFB1,UCP2,VCAM1
LRP1	0.319	transmembrane receptor		-0.899	-0.894	0.0155	APP,CDH2,CTSD,LRP1,MMP2,MRC2,PDGFRB,SERPINF1,SLC2A4
ZMPSTE24	-0.146	peptidase		-1.596	-1.586	0.0155	CISH,CTSV,CXCL14,DDIT4,Esrra,GADD45A,GADD45G,IGFBP3,IGFBP5
PRKAA2	-0.799	kinase		0.467	0.479	0.0156	ACOT7,ALAS1,ALB,BAX,DDAH1,Foxp2,GATA3,HIGD1A,IGFBP4,LDHA,Ly6a (includes others),NOX4,SNAI1,TGM2,TP53,TTYH1
arsenite		chemical toxicant		0.579	0.57	0.0156	ASPN,CCND1,CDH2,CDK14,FZD1,GADD45A,GCLC,HMOX1,Mt2,PPP1R3C,PRKD1,SFRP4,ST8SIA5,TGFB1,TP53,UGDH
ELAVL1	-0.005	other		-0.434	-0.449	0.0157	9930111J21Rik1/Gm12185,ANXA11,ASCL1,Bst2,CDH2,FCGR2A,GATA3,GBP6,GLS2,Gvin1 (includes others),HMOX1,Iigp1,NDUFB8,PCGF2,RACK1,RPN2,RPS6,Tgtp1/Tgtp2,TIMM17A,TP53,TP63,TSC22D3,VCAM1
BMP2	0.125	growth factor		1.203	1.186	0.0158	ASCL1,BCL2,CCND1,COL1A2,COL2A1,CTSK,FGF2,FGFR1,FZD1,GREM1,IBSP,ID1,ID3,IGFBP5,POSTN,RET,RUNX2,SOX6,SPP1,TAC1,TGM2,TIMP1,TNFRSF11B,TOB1,VDR
PHF1	0.15	transcription regulator				0.0159	BAX,CCNG1,HOXD10,HOXD8,HOXD9,TP53
SPRY1	0.698	other		-1.633	-1.621	0.0159	FGF1,FGF7,FGF9,MMP11,MMP14,MMP2
THBS4	1.195	other		0.708	0.699	0.0159	CALR,COL2A1,MMP16,MMP24,TNC,VCAM1
UTP		chemical - endogenous mammalian	Activated	2.371	2.364	0.0159	CDH2,KCNC4,MB,MYLPF,SPP1,VCAM1
RAC1	0.109	enzyme		0.844	0.829	0.0161	CCN2,CCND1,CDH2,CKM,COL1A2,COL2A1,FGF2,HMOX1,IL33,MMP14,MMP2,SOD2,SOX6,TGFB1,VCAM1
EFNA3	1.83	kinase		0	0.003	0.0163	CCN2,CRABP2,DCBLD2,DUSP6,EFNA3,PLAT,SLC20A1,TGM1
FLI1	-0.104	transcription regulator		1.285	1.272	0.0165	CCN2,CCND1,COL1A2,ERG,LDHA,NPM1,PF4,RACK1,TGFBR2,TNC
rotenone		chemical toxicant		-0.563	-0.562	0.0165	BAX,CCND1,GADD45G,HMOX1,SOD2,TIMP1,TIMP2,TP53,UCP2,VCAM1
ADORA2B	-0.059	g-protein coupled receptor		1.912	1.904	0.0166	ARG1,BCL2,COL1A2,RUNX2,SPP1,TGFB1,TIMP1	ADORA2B,AHR,NFkB (complex),P38 MAPK,PPARGC1A,RUNX2,SP1,TP53,estrogen receptor
GDF9		growth factor		-0.266	-0.272	0.0166	CCN2,GREM1,HSPG2,ID1,ID3,PTGER2,PTX3
IHH		enzyme		1	0.989	0.0166	CCND1,MET,PTGFR,RUNX2,SPP1,TAC1,TNFRSF11B
bardoxolone		chemical drug		1.992	1.988	0.0166	CCND1,CEBPB,GCLC,HMOX1,IRS1,UGDH,UQCRFS1	MAPK8,NFkB (complex),TP53,bardoxolone
parthenolide		chemical drug		0.335	0.344	0.0166	BCL2,HMOX1,LEF1,LIF,SOD2,TP53,VCAM1
ERK		group		1.541	1.521	0.0167	BAX,BCL2,BGN,CCK,CCN2,CCND1,CTSK,DIO2,EGR2,FGF2,GCLC,GPRC5C,HMOX1,IRS1,LCN2,LIF,MAFB,MMP14,MMP2,POSTN,RAB7B,RUNX2,TGM2,TIMP1,TP53,TUBA1A,UGCG	AHR,Akt,CREBBP,ERK,ESR1,NFkB (complex),PI3K (complex),PPARGC1A,RB1,RUNX2,SP1,TAF4,TP53,estrogen receptor
mibolerone		chemical drug		-1.065	-1.074	0.0168	AMD1,AQP5,AR,BMP6,CALR,CCND1,COL1A2,ERP29,GADD45G,HEXB,HSP90B1,IDH3G,IGFBP3,KLK3,PGK1,TUBA1A,UCP2,USO1
miR-29b-3p (and other miRNAs w/seed AGCACCA)		mature microrna		1.33	1.354	0.0169	CCND1,CD276,COL1A2,COL4A5,CRTAP,FAM3C,FBN1,FRAT2,MLF1,PIK3R1,TGFBR2,TP53,Tpm1
ABCC8	0.094	transporter		1.165	1.174	0.0169	ACADVL,CAT,CPT1B,SOD2
CRTC1	0.122	transcription regulator				0.0169	CYCS,IDH3A,NEDD9,TIMP1
Cd2+		chemical toxicant				0.0169	CCND1,DDAH1,HMOX1,Mt1
DDX17	0.008	enzyme				0.0169	CCND1,CTSD,HTRA1,LCN2
HOXB9	-0.588	transcription regulator				0.0169	FGF2,HOXD10,HOXD11,NCAM1
SMURF2	0.026	enzyme				0.0169	CCN2,NEDD9,RUNX2,TGIF1
SOX5	-0.342	transcription regulator		1.067	1.06	0.0169	BMP6,COL2A1,HSPG2,RUNX2
cetrorelix		biologic drug				0.0169	BAX,BCL2,RPSA,TP53
mir-322		microrna		0.927	0.934	0.0169	BCL2,CDH2,FGF2,FGFR1
pirfenidone		chemical drug				0.0169	CAT,CCN2,POSTN,SNAI1
prostaglandin A2		chemical - endogenous non-mammalian		0.885	0.887	0.0169	CCND1,HMOX1,TP53,VCAM1
miR-122-5p (miRNAs w/seed GGAGUGU)		mature microrna		0.384	0.406	0.0169	ALDOA,ANXA11,BCL2L2,CCNG1,CS,EEF1A1,Foxp1,HJV,MAPK11,NCAM1,PALM
minocycline		chemical drug	Inhibited	-2.008	-1.991	0.0169	ACE,BAX,BCL2,CD163,CDK5,GATA3,MMP2,RGMA,SLC3A2,TP53,VCAM1	AHR,Akt,ESR1,IL1,NFkB (complex),P38 MAPK,PARP1,PPARGC1A,RUNX2,SP1,TP53,estrogen receptor,minocycline
(+)-MK-801		chemical drug		-1.824	-1.828	0.017	ALDOA,APP,ATP1B2,CACNB3,CCND1,FGF2,GJA5,PTGER2,RUNX2,TAC1,TIMP1,TP53	(+)-MK-801,Akt,ERK,L-glutamic acid,NFkB (complex),P38 MAPK,PPARGC1A,RB1,RUNX2,SP1,TP53,estrogen receptor
WDR5	-0.105	transcription regulator		0.882	0.874	0.0173	CDH2,KLK3,RUNX2,SPP1,TP53
miR-296-5p (miRNAs w/seed GGGCCCC)		mature microrna		-0.246	-0.231	0.0173	BAX,BCL2,CCND1,TNC,TP53
EPO		cytokine		-0.941	-0.952	0.0174	ANK1,BAX,BCL2,CISH,CTSK,CTSZ,DALRD3,EEF1A1,FGF2,GATA3,ID1,MLH1,MMP2,N4BP2L1,NPM1,OSBPL1A,PIK3IP1,PRKCZ,RCC2,RNF128,Rps3a1,RPS4Y1,RPS6,SPP1,STRADB,TFRC,TNFRSF11B,TP53,TPI1,TSC22D3,UCP2,UGCG
ESRRA		ligand-dependent nuclear receptor	Inhibited	-3.179	-3.204	0.0176	ACADVL,ALAS1,CDH2,Cox8b,CPT1B,CYCS,Esrra,ETFDH,FABP3,FRAT2,GAPDH,HK2,IDH3A,IGFBP4,LDHA,PPP1R1B,RPL19,RUNX2,SPP1,TPI1	ESRRA,PPARA,PPARGC1A,PPARGC1B,TP53
9,10-dimethyl-1,2-benzanthracene		chemical toxicant		1.791	1.777	0.0178	ARG1,BAX,CCND1,FGF7,GADD45A,GCLC,RUNX1,S100A8,TP53	9,10-dimethyl-1,2-benzanthracene,AHR,NFkB (complex),PPARGC1A,SP1,TP53,estrogen receptor
BACH2	0.036	transcription regulator		-0.963	-0.954	0.0178	BCL2,GATA3,HMOX1,ID3,LEF1,MAF,MAFB,S100A8,TP53
IGF2	0.279	growth factor		-1.054	-1.061	0.018	ARHGEF2,CCN2,CCND1,CKM,CTSV,EGR2,FEM1A,GADD45A,GRN,H19,IGFBP3,IGFBP4,IGFBP5,MMP11,OGN,PHLDA1,PIK3R1,SLC20A1,SLC2A4,SPP1,TGIF1,TP53
SOX4	0.212	transcription regulator		0.666	0.646	0.018	BAX,BCL2,BEX3,CDH2,GCAT,Gm12854/S100a11,H1-10,HIPK2,IGFBP4,Ly6a (includes others),LY6D,MMP11,Mt1,NCAM1,NREP,SERPINE2,SLC7A3,TENM4,TNFRSF19,TSPAN6,TUBA1A,UCHL1,VOPP1
mir-223		microrna		-0.57	-0.575	0.0182	ASPRV1,CA4,EGR2,FGL2,GFPT1,LEF1,Ly6a (includes others),MMP27,Mt2,MYO1D,NFIA,POSTN,RAB38,SLC29A1,SLC2A4,SLC40A1,SOAT1,TOB1
1,3-bis(4-hydroxyphenyl)-4-methyl-5-[4-(2-piperidinylethoxy)phenol]-1H-pyrazole		chemical reagent				0.0184	BAX,CCND1,SLC2A4
BMS-754807		chemical drug				0.0184	BCL2,MET,TGFBR2
CCL18		cytokine				0.0184	MMP2,SNAI1,TGFB1
FBXL5	-0.219	enzyme				0.0184	HMOX1,Mt2,TFRC
GRK5	-0.08	kinase				0.0184	APP,BCL2,TP53
GUSB	0.326	enzyme				0.0184	CTSV,EGR2,PITPNA
MIA		other				0.0184	CDH2,MMP14,PLAT
MKX	0.24	transcription regulator				0.0184	COL1A2,SOX6,TNMD
NKX3-2	0.089	transcription regulator				0.0184	COL2A1,POSTN,RUNX2
PDGF (family)		group				0.0184	CALR,EEF1B2,PDIA3
PDLIM7	-0.191	other				0.0184	IBSP,RUNX2,SPP1
PNPLA8	-0.148	enzyme				0.0184	HMOX1,HSP90B1,Mt1
PRKCH	-0.132	kinase				0.0184	CCND1,PRKD1,TGM1
PT-2385		chemical drug				0.0184	GLB1,NDUFS1,UQCRFS1
RASSF8	0.236	other				0.0184	DDAH1,NEDD9,POSTN
SCUBE3	-0.14	other				0.0184	MMP2,SNAI1,TGFB1
SMAD1/5		group				0.0184	CEBPB,ID1,ID3
SNED1	-0.309	other				0.0184	GAPDH,IGFBP3,SLC2A4
Smad2/3/4		group				0.0184	CCN2,NOX4,TIMP1
Sphk		group				0.0184	IL33,MBTPS1,VCAM1
Srgn	-0.07	other				0.0184	CMA1,Mcpt4,TPSAB1/TPSB2
TMPO	-0.049	other				0.0184	ASPN,COL12A1,TIMP2
TSPO	0.274	transmembrane receptor				0.0184	BCL2,SOD2,VCAM1
ZNF100		transcription regulator				0.0184	DDAH1,NEDD9,POSTN
ZNF254		transcription regulator				0.0184	DDAH1,NEDD9,POSTN
ZNF429		transcription regulator				0.0184	DDAH1,NEDD9,POSTN
ZNF43	-0.491	transcription regulator				0.0184	DDAH1,NEDD9,POSTN
ZNF431		transcription regulator				0.0184	DDAH1,NEDD9,POSTN
ZNF528		other				0.0184	DDAH1,NEDD9,POSTN
ZNF665	-0.072	other				0.0184	DDAH1,NEDD9,POSTN
ZNF708		other				0.0184	DDAH1,NEDD9,POSTN
ZNF85		transcription regulator				0.0184	DDAH1,NEDD9,POSTN
cariporide		chemical drug				0.0184	HK2,SLC9A1,SPP1
di-spiropyrrolizidino oxindole andrographolide derivative CY2		chemical reagent				0.0184	BAX,BCL2,TP53
diquat		chemical toxicant				0.0184	HMOX1,Mt1,Mt2
ethyl 2-{[(6,7-dimethyl-3-oxo-1,2,3,4-tetrahydro-2-quinoxalinyl)acetyl]amino}-4,5-dimethyl-3-thiophenecarboxylate		chemical reagent				0.0184	BAX,PLAT,TP53
iodine		chemical - endogenous mammalian				0.0184	BAX,BCL2,TP53
lidocaine		chemical drug				0.0184	APP,BCL2,GATA3
quinidine		chemical drug				0.0184	AGTR2,CCND1,TP53
sanguinarine		chemical - endogenous non-mammalian				0.0184	HMOX1,TIMP1,TIMP2
tryptase		group				0.0184	BAX,F2R,PLAT
zymosan		chemical - endogenous non-mammalian		1.097	1.09	0.0186	ARNT2,CAT,CPT1B,CST3,DEPP1,Esrra,HMOX1,LIF,MMP2,PTGS1
LCN2	-0.612	transporter		0.783	0.775	0.0187	ARG1,ATF5,BAX,CDH2,HMOX1,MMP2,RBP4,RUNX2,SOD2,SPP1,STRA6,TGFB1,TNFRSF11B
CDH1	1.427	other	Inhibited	-2.42	-2.418	0.019	CCND1,CD44,CDH2,CTNND1,IGFBP3,LCN2,MMP14,NCAM1,PIK3R1,TGFB1,TPBG	AHR,Akt,CDH1,ESR1,NFkB (complex),PI3K (complex),PPARGC1A,PTEN,RB1,RUNX2,SP1,TP53,estrogen receptor
E2F1	0.026	transcription regulator		0.107	0.087	0.0191	AR,BAX,BCL2,BNIP3,Calm1 (includes others),CALR,CCND1,CD44,CITED2,COL2A1,CRABP2,EGR2,Esrra,EYA2,FGF2,FGFR1,GM2A,H19,HSP90B1,ID3,IDH3A,INMT,IRS1,IRS2,MAF,MAPK14,MCM6,MLH1,MMP16,MYH4,OXT,PIK3R1,PLPPR4,PRKAA2,PSAT1,RAB1A,SLC3A2,SOD2,SRPRA,STK17B,TAPBP,TGFB1,TGM1,TP53,UCP2,UGDH,VCAM1,ZNF672
Jnk		group		1.447	1.427	0.0192	APLN,APP,BAX,CCN2,CCND1,CD44,CDH2,GADD45A,HMOX1,MMP14,MMP2,MRC2,NOX4,PLAT,POSTN,RBP1,SOD2,STRA6,TGFB1,TGFBR2,TGM2,TIMP1,TP53,VCAM1
15-deoxy-delta-12,14 -PGJ 2		chemical - endogenous mammalian		0.649	0.658	0.0192	BAX,BCL2,CCN2,CCND1,CCNG1,COL1A2,CPT1B,CTSD,GADD45A,GCLC,HMOX1,KLK3,MAPK14,NOX4,RUNX2,SLC2A4,SLC9A1,SOAT1,SPP1,TGIF1,TP53,VCAM1
ADAMTS12	-0.31	peptidase		0.128	0.144	0.0194	CHI3L1,IL33,LCN2,MGP,S100A8,TNFAIP2
Ap2		group		-1.091	-1.086	0.0194	ALB,BCL2,F2R,HSD17B1,MMP2,TGFB1
PRKAR1A	-0.142	kinase		0.749	0.746	0.0194	BAX,BCL2,CCND1,RAB25,RAP1A,VDR
THBS1	0.327	other		1	1.001	0.0194	CCN2,COL1A2,LRP1,MMP2,TGFB1,TIMP1
indole-3-carbinol		chemical drug		0.663	0.666	0.0194	ANXA1,BAX,BCL2,CCND1,GATA3,SPP1
IGFBP3	0.398	other		0.564	0.566	0.0196	BAX,BCL2,COL2A1,LYVE1,SDC2,TNC,VCAM1
fluvastatin		chemical drug		0.375	0.378	0.0196	APP,BCL2,CCND1,DCLK1,HMOX1,LRP1,PLAT
HNRNPA2B1	-0.221	other				0.0197	CADM1,CTSV,DCLK1,H19,HIPK2,ITPRID2,KCTD12,LEPR,LPAR1,NPR3,PEG10,S1PR3,SERPINA1,SLC1A2,SLC2A4,SNAI1,SVEP1,TLE1
IL10		cytokine		-0.789	-0.792	0.0201	ARG1,ARNT2,BAX,BCL2,BMP6,CD163,Cd24a,CD28,CD44,CTSA,CTSD,CTSV,CTSZ,DEPP1,FCGR2A,FLRT2,HEXB,HMOX1,HTATIP2,IGFBP4,Iigp1,IL33,IRAK1,LAMP2,LIF,MAF,MMP2,NEDD9,PAM,PHGDH,PTX3,S100A8,TFRC,TGFB1,TIMP1,TSC22D3,VCAM1
PAX5		transcription regulator		1.673	1.676	0.0204	BCL2,CCND1,HK2,MET,MMP2,PFKL,PGAM1,SLC16A10,TP53	Akt,NFkB (complex),PAX5,PPARGC1A,RUNX2,SP1,TP53
TIMP3	0.075	other		-1.51	-1.5	0.0204	APP,CEBPB,EGR2,JAK1,LTBP1,MET,MMP2,TGFB1,TGFBR2
POU2F2	0.098	transcription regulator		-0.971	-0.993	0.021	ADA,CCDC28B,COCH,DEPP1,DIXDC1,ELL2,FJX1,KCNN4,SPP1,TIMP2,TNFAIP2,ZDHHC23
ATM	0.174	kinase		-0.207	-0.217	0.021	BAX,CCN2,CCND1,GADD45A,GADD45G,HMOX1,HSP90AB1,IL33,TGM2,TP53
BNIP3L	-0.028	other		1.117	1.119	0.021	ANK1,CD47,CST3,GADD45A,GAPDH,HK2,PDGFRB,TFRC,TGFB1,TIMP2
entinostat		chemical drug		0.144	0.142	0.021	BAX,BCL2,CCND1,IGFBP3,LYVE1,MMP2,RUNX2,TGFBR2,TNFRSF19,TP53
FGF7	0.469	growth factor		1.265	1.253	0.0212	ADSL,APRT,AQP5,CCND1,CD44,FGF1,FGFR1,MMP2,RUNX2,S100A8,TP53
R5020		chemical reagent		0.518	0.505	0.0212	CCN2,CCND1,CEBPB,CTSD,GAL,IRS2,NAGA,PPP1R1B,SGK1,TIMP2,VIPR1
MAPK9	-0.051	kinase		0.358	0.346	0.0218	BAX,BCL2,CACNB3,CCN2,CEBPB,DIO2,FGL2,GADD45A,GAPDH,Iigp1,LIF,PDIA3,PLAT,PTX3,RPSA,SERPINA1,SOD2,TP53,VDR,Vnn3
DSP	2.594	other		0.492	0.499	0.0218	COL1A2,DSC2,DSC3,MMP14,TGFB1
L-arginine		chemical - endogenous mammalian		0.333	0.331	0.0218	ASS1,BCL2,BGN,TFRC,TGFB1
desipramine		chemical drug		-0.618	-0.618	0.0218	BCL2,FGF2,HMOX1,KCNH2,PDE4A
pifithrin alpha		chemical reagent		-0.391	-0.382	0.0218	AR,BAX,CCNG1,HMOX1,TP53
KL	-1.845	enzyme		-1.505	-1.499	0.0219	BAX,BCL2,CCND1,KL,SOD2,TGFB1,TNFRSF11B,VDR	Akt,KL,MAPK8,NFkB (complex),P38 MAPK,PPARGC1A,RUNX2,SP1,TP53,estrogen receptor
PRKACA	0.069	kinase		-0.218	-0.23	0.0219	ALAS1,ANTXR1,CCK,CCND1,CEBPB,DIO2,SFRP4,VCAM1
Ro31-8220		chemical - kinase inhibitor		-0.895	-0.88	0.0219	AQP2,BCL2,COL1A2,HMOX1,KLK3,MMP2,Mt1,VCAM1
TFEB	-0.056	transcription regulator	Activated	2.8	2.781	0.0219	ATP6V1A,CTSA,CTSD,CTSK,HEXA,NAGLU,SCPEP1,SGSH
mir-30		microrna	Inhibited	-2.396	-2.382	0.0219	AR,BAX,CCN2,GADD45A,RAB38,RUNX2,SNAI1,TP53	AHR,FOXM1,NFkB (complex),P38 MAPK,PPARGC1A,RB1,RUNX2,SP1,TP53,YBX1,estrogen receptor,mir-30
10-decarbamoylmitomycin C		chemical toxicant				0.0221	GADD45A,TP53
10-hydroxycamptothecin		chemical - endogenous mammalian				0.0221	BAX,BCL2
ABC-294640		chemical drug				0.0221	APP,MAP2
ACS84		chemical reagent				0.0221	GCLC,HMOX1
AGAP2	-0.166	enzyme				0.0221	CCND1,TP53
AMELX		growth factor				0.0221	COL2A1,RUNX2
AP2A2	-0.066	transporter				0.0221	BAX,BCL2
ASPN	0.672	other				0.0221	COL2A1,TGFB1
BHLHE22	-0.341	transcription regulator				0.0221	CDH11,ZBTB18
BIRC6	-0.071	enzyme				0.0221	BAX,TP53
BMP1	0.082	peptidase				0.0221	IGFBP3,OGN
CKLF	0.143	cytokine				0.0221	BAX,BCL2
CLCN3	-0.308	ion channel				0.0221	TGFB1,VCAM1
CNDP2	0.065	peptidase				0.0221	CD44,MMP11
Cbp/p300-Maf-Nfe2l2		complex				0.0221	GCLC,HMOX1
Collagen type VI		complex				0.0221	BAX,CCND1
DLG3	0.034	kinase				0.0221	EPHB2,GRIN2A
DNM2	0.023	enzyme				0.0221	MMP14,MMP2
DOCK3	0.595	other				0.0221	GRN,WASF1
E64		chemical - endogenous non-mammalian				0.0221	APP,MMP2
ETHE1	-0.295	enzyme				0.0221	BAX,TP53
GEM231		chemical drug				0.0221	BAX,BCL2
GNPTAB	-0.001	enzyme				0.0221	GUSB,MANBA
GRM3		g-protein coupled receptor				0.0221	GRIN2A,SLC1A2
HS6ST2	0.41	enzyme				0.0221	FGF2,TPSAB1/TPSB2
HSPA4	-0.038	other				0.0221	APP,TGFB1
ITGBL1	0.36	other				0.0221	CD44,CDH11
Integrin alpha 4 beta 1		complex				0.0221	BCL2,MMP14
JMY	-0.085	transcription regulator				0.0221	BAX,HTRA1
L-JNK inhibitor I		chemical reagent				0.0221	BMP6,HMOX1
MSH2	0.022	enzyme				0.0221	CCND1,TP53
MT3		other				0.0221	BAX,BCL2
NCF2	-0.005	enzyme				0.0221	SOD2,VCAM1
NDST2	0.191	enzyme				0.0221	CMA1,Mcpt4
NDUFAF3	-0.251	other				0.0221	CCND1,CTSD
P4HB	0.095	enzyme				0.0221	PDIA3,PDIA4
PMEPA1	0.906	other				0.0221	AR,KLK3
PPP2R5B	0.208	phosphatase				0.0221	FAP,SERPINE2
PTPN23	0.142	phosphatase				0.0221	CDH2,SNAI1
Pick1		other				0.0221	AIMP2,SYT11
RDH16		enzyme				0.0221	CCND1,CYP26A1
RPS14	0.191	translation regulator				0.0221	S100A8,TP53
RPS7	0.108	other				0.0221	PIK3R1,TP53
SCTR	-0.189	g-protein coupled receptor				0.0221	AQP2,AQP4
SEC23B	-0.088	transporter				0.0221	BAX,HSP90B1
SIGMAR1	0.097	transmembrane receptor				0.0221	BCL2,KCNH2
SKF-83959		chemical reagent				0.0221	FGF2,MAP2
Slfn1		enzyme				0.0221	CCND1,PDGFRB
TLCD3A	-0.142	other				0.0221	CCND1,TP53
TMPRSS6		peptidase				0.0221	BMP6,ID1
TTC5	0.128	other				0.0221	BAX,TP53
VDAC1	-0.376	ion channel				0.0221	APP,NGB
WWP1	-0.385	enzyme				0.0221	PRKAA2,TP63
YAP/TAZ		group				0.0221	CCN2,PSAT1
ZC3H10	0	other				0.0221	ATP5F1A,NDUFB8
anastrozole		chemical drug				0.0221	TNFRSF11B,VCAM1
cadmium sulfate		chemical toxicant				0.0221	HMOX1,Mt1
dideoxyadenosine		chemical toxicant				0.0221	COL1A2,RUNX2
diosmin		chemical drug				0.0221	BAX,TP53
durapatite		chemical - endogenous mammalian				0.0221	IBSP,SPP1
elcatonin		biologic drug				0.0221	MMP2,TNFRSF11B
enecadin		chemical drug				0.0221	BCL2,FGF2
epalrestat		chemical drug				0.0221	PDGFRB,TGFB1
ergosterol-5,8-peroxide		chemical - endogenous mammalian				0.0221	CCN2,VCAM1
ibandronic acid		chemical drug				0.0221	RUNX2,TNFRSF11B
lanthanum chloride		chemical reagent				0.0221	BAX,MGP
lead nitrate		chemical toxicant				0.0221	BAX,BCL2
leucine-2-alanine enkephalin		chemical drug				0.0221	APP,KCNB1
liarozole		chemical drug				0.0221	TGM1,VDR
mineralocorticoid		chemical drug				0.0221	APLN,SGK1
mizoribine		chemical drug				0.0221	CCND1,SGK1
potassium cyanide		chemical reagent				0.0221	TIMP1,TIMP2
riociguat		chemical drug				0.0221	SPP1,TIMP1
ruthenium red		chemical reagent				0.0221	AQP5,COL2A1
tretinoin tocoferil		chemical reagent				0.0221	CAT,GCLC
RARG	0.104	ligand-dependent nuclear receptor		-0.359	-0.361	0.0227	ATP6V0A4,CCN2,CRABP2,CYP26A1,CYP26B1,EGR2,GJB4,KLK3,MAFB,MMP11,SLC17A9,STRA6,Tdh
TRAP1	-0.22	enzyme		0.132	0.137	0.0227	ANXA1,ATP5F1A,BCL2,CD44,CHCHD3,CNNM4,GAPDH,GRN,HIBADH,NCAM1,RAB38,SARS1,TMA16
BDKRB2	0.403	g-protein coupled receptor		-1.086	-1.083	0.0228	CCN2,CD44,TGFB1,TP53
CCAT2		other		-1.127	-1.132	0.0228	BAX,BCL2,CCND1,TGFB1
CGB3 (includes others)		other				0.0228	DUSP6,MMP2,RUNX1,SGK1
D-galactose		chemical - endogenous mammalian				0.0228	BAX,BCL2,CRYBA4,SOD2
HIF3A	-0.318	transcription regulator		1.067	1.073	0.0228	APLN,Foxp2,PDGFRB,PGK1
IGFBP1		other		1	0.995	0.0228	BCL2,CEBPB,IGFBP3,TGFB1
PECAM1	-0.089	other		-1.131	-1.125	0.0228	BCL2,CCND1,CD44,MMP2
RALA	0	enzyme		-0.218	-0.227	0.0228	CDH2,MMP2,SNAI1,TP53
TWNK	-0.02	enzyme	Inhibited	-2	-1.997	0.0228	ATF5,NDUFB8,TRIB3,UQCRC2
costunolide		chemical - endogenous non-mammalian		1.987	1.984	0.0228	BAX,BCL2,MMP2,TP53	Akt,NFkB (complex),PPARGC1A,RUNX2,SP1,TP53,costunolide
cystamine		chemical drug	Inhibited	-2	-1.995	0.0228	BCL2,LTBP1,SPP1,TNFRSF11B
desoxycorticosterone		chemical - endogenous mammalian		1.959	1.948	0.0228	CCN2,NOX4,SPP1,TGFB1
estrone		chemical - endogenous mammalian				0.0228	AR,IRS1,IRS2,PIK3R1
harmine		chemical - endogenous non-mammalian		0	0.003	0.0228	BAX,BCL2,MMP2,RUNX2
nystatin		chemical drug				0.0228	CDH2,LCN2,SPP1,TIMP1
onapristone		chemical drug		-1.103	-1.092	0.0228	ADAMTS1,CTSD,RUNX1,TGFB1
pyruvic acid		chemical - endogenous mammalian		0.988	0.982	0.0228	ALDOA,BAX,BCL2,TP53
zeranol		chemical - endogenous mammalian		-1.067	-1.063	0.0228	BAX,BCL2,CITED2,HMOX1
CLDN7	0.025	other		0.307	0.307	0.023	ABLIM1,CCN2,GRINA,LIMA1,MMP2,NNMT,PANX2,PHGDH,PLAAT3,PRKCZ,SCEL,SERPINB7,TIMP2,XXYLT1,ZCCHC14
GW501516		chemical drug		-1.757	-1.771	0.023	BCL2,CAT,CCND1,Cox8b,CPT1B,FABP3,FGFR1,IGFBP3,IGFBP5,LIPG,PLAT,S100A8,SLPI,TP53,UCP2	GW501516,MAPK8,NFkB (complex),PPARA,TP53
KDM3A	-0.128	transcription regulator		0.137	0.121	0.0231	CCN2,CCND1,HMOX1,IL33,PPP1R3C,TNC,TNXB
MEOX2	0.067	transcription regulator		0.87	0.884	0.0231	FGF2,ID1,ID3,LRP1,MMP14,PTX3,VCAM1
acetovanillone		chemical drug		-1.947	-1.935	0.0231	APP,HMOX1,MAPK14,MMP2,PVALB,SOD2,UCP2	AHR,MAPK8,NFkB (complex),PPARGC1A,SP1,TP53,acetovanillone,estrogen receptor
sodium bisulfide		chemical reagent		-0.409	-0.409	0.0231	ACE,BAX,BCL2,CAT,HSP90AB1,NOX4,SOD2
thapsigargin		chemical toxicant		1.923	1.907	0.0231	AR,ASB11,BAX,CA9,CALR,CCND1,CEBPB,COL2A1,CREB3L2,DDIT4,DIO2,EGR2,GADD45A,HMOX1,HSP90B1,LIFR,MET,MLF1,OXT,SGK1,STARD5,TGM2,TP53,VCAM1	AHR,Akt,ERK,MAPK8,NFkB (complex),P38 MAPK,PPARGC1A,RUNX2,SP1,TP53,estrogen receptor,thapsigargin
MACROH2A1	-0.083	other	Inhibited	-2.121	-2.116	0.0233	ASCL1,CITED2,FGD3,FGF1,GADD45A,GCK,ID1,IRS1,MAP2K6,NDUFB6,SLC2A4,SNAI1
4-(2-aminoethyl)benzenesulfonylfluoride		chemical - protease inhibitor		0.302	0.314	0.0233	COL1A2,ENPP2,HMOX1,MATN3,SOD2,TNC
ADA	-0.514	enzyme		-1.446	-1.433	0.0233	ADA,COL1A2,PLAT,SPP1,TGFB1,TIMP1
NF1	-0.069	other		-0.946	-0.934	0.0233	CCND1,FGF2,MAF,MDK,NPM1,RPS19
PTCH1	0.205	transmembrane receptor		0.64	0.65	0.0233	CCND1,COL2A1,GADD45A,MYH1,TNNI2,TNNT3
ROCK1	-0.041	kinase		0.82	0.805	0.0233	APP,CCN2,CCND1,CD44,FBN1,VCAM1
estradiol benzoate		chemical drug		0.839	0.832	0.0237	AR,CCK,CPT1B,LEPR,OXT,PDIA3,PLAT,RBP4,SLC2A4,TGFB1,UCP2
HIC1	0.009	transcription regulator		-0.508	-0.505	0.0237	AHNAK2,CCND1,CXCL14,FADS1,LCN2,LIF,PLPPR4,RIN2,SNAPC1,SPP1
benzene		chemical toxicant		-1.897	-1.899	0.0237	ANPEP,ATF5,BNIP3,CCNG1,CD47,CITED2,FBXO3,IGFBP3,NDUFS1,YWHAQ
gentamicin C		chemical drug		0	-0.017	0.0237	ADAMTS1,ANXA1,CD44,FCGR2A,FXYD5,LCN2,SPP1,TGIF1,TIMP1,Tpm1
PSEN2	0.024	peptidase		1.129	1.132	0.024	APP,BAX,BCL2,CTSZ,DHRS7,ENPP2,F2R,GAPDH,HSD17B1,KCNAB2,LHX8,PDGFRB,TNXB,TP53
cephaloridine		chemical drug		-0.772	-0.787	0.024	ALAS1,CCN2,CSMD1,CXCL14,DDIT4,DSG2,FBP2,HMOX1,MCM6,MMP16,RAB31,STRA6,TFRC,TRIB3
olanzapine		chemical drug	Inhibited	-2.496	-2.503	0.024	BCL2,CHST3,COL1A2,CYSLTR1,DCBLD2,GPHA2,GRIN3B,HMOX1,MCHR1,PYGM,S100A8,SLC24A3,SLC38A1,TSPAN8
glucocorticoid		chemical drug		1.691	1.691	0.0241	ANXA1,APLN,BAX,BCL2,BMP6,CCN2,CD163,CD44,CEBPB,GRN,HMOX1,IBSP,IGFBP3,KLK3,Mt1,OGN,PFKL,PLAT,SERPINA3,SGK1,SLPI,SPP1,TGFB1,TNFRSF11B,TP53,TSC22D3,VCAM1,VDR,VIPR1	AHR,FAS,IL1A,NFkB (complex),PPARGC1A,RUNX2,SMAD7,SP1,TGFB1,TP53,Tgf beta,estrogen receptor,glucocorticoid
SPARC	-0.216	other		-0.996	-0.991	0.025	COL1A2,CPT1B,LEF1,LYVE1,MAP2,MCM6,MMP2,NIPSNAP2,NOTCH2,P2RY2,PCGF2,SNAI1,TGFB1,TMC5,TRIM5
ADRA1B	0.27	g-protein coupled receptor				0.0252	CCND1,CEBPB,CTSV,DDAH1,EGR2,FGF7,LIF,MYLPF
EGR3	0.797	transcription regulator		-1.463	-1.464	0.0252	ID3,INSC,IRAK1,LTBP3,MXRA8,RCCD1,RET,SLIT2
SPHK1	-0.08	kinase		0.8	0.795	0.0252	APP,CCN2,CCND1,COL1A2,IL33,MAP2K6,TIMP1,TP53
valsartan		chemical drug		-1.711	-1.698	0.0252	APP,AQP4,FGF2,MMP2,POSTN,SPP1,TGFB1,TIMP1	AHR,Collagen type I (complex),NFkB (complex),PPARGC1A,RUNX2,SP1,TP53,estrogen receptor,valsartan
IKBKE	0.343	kinase	Inhibited	-3.462	-3.481	0.0257	BCL2,CCND1,DLST,ENO3,IDH3A,LDHA,PDHA1,PFKL,PGK1,PGM1,SLC16A3,TPI1
DSCAM		other		1.069	1.056	0.0262	ATF5,EFNA3,GADD45G,GRIN3B,ID3,IRS1,MAP2,NREP,RET,RGMA,ROBO2,SFRP4,SRGAP3,TAC1
CUL3	-0.274	enzyme		-1.667	-1.662	0.0262	ACE,Actn3,COL2A1,COL9A1,KERA,MATN3,MFAP4,MYBPC2,SPON1
carboplatin		chemical drug		1.129	1.117	0.0262	CD44,CD47,FCGR2A,FXYD5,LCN2,SPP1,TGIF1,TIMP1,TP53
telmisartan		chemical drug		-1.245	-1.243	0.0262	APLN,BAX,BCL2,CCN2,CD163,CLEC4M,PLA2G5,SLC2A4,TGFB1
mir-34		microrna		0.394	0.41	0.0263	AR,BAX,BCL2,CCND1,CD47,KCNH2,LEF1,MET,NOTCH2,RUNX2,TP53
mir-8		microrna		1.799	1.821	0.0264	ADAMTS1,BAX,BCL2,CCND1,CD47,CDH2,CITED2,CRTAP,DUSP26,ESM1,FAT1,HMOX1,KCNK1,LEPR,LRP1,MET,PTPN14,RNF128,SERPINE2,SNAI1,TIMP2,TOB1,Wasl
ITGB3	-0.177	transmembrane receptor		-0.839	-0.845	0.0265	BCL2,COL1A2,HSP90B1,MMP14,MMP2,RUNX1,RUNX2,TGFB1,TGFBR2,TIMP1
miR-17-5p (and other miRNAs w/seed AAAGUGC)		mature microrna		-0.586	-0.566	0.0265	APP,BCL2,CCND1,CRIM1,EGR2,JAK1,RUNX1,RUNX2,TGFBR2,TP63
FOXM1	-0.059	transcription regulator		-1.589	-1.611	0.0266	ACE,ANXA1,AR,CAT,CCND1,CDH2,FUT4,FZD1,GLB1,LDHA,LEF1,MET,MMP2,PGK1,SNAI1,SOD2,TGFBR2,TP53	Akt,FOXM1,NFkB (complex),PPARGC1A,RB1,RUNX2,SP1,TP53,YBX1
LHCGR		g-protein coupled receptor		-1.3	-1.311	0.0269	ADAMTS1,AR,CTSV,DUSP6,HSD17B1,IGFBP4,PTGS1
SUMO3	-0.013	other		-0.64	-0.638	0.0269	APP,Bst2,CTH,IRS1,MMP14,MOXD1,TNC
XDH	-0.029	enzyme		-0.22	-0.22	0.0269	CCN2,CEBPB,ID3,MMP14,MMP2,SPP1,TIMP2
prostaglandin E2		chemical - endogenous mammalian		0.442	0.428	0.0269	ADAMTS1,APP,ARG1,BAX,BCL2,CCN2,CCND1,CD44,CEBPB,EGR2,F2R,FGF2,HMOX1,IBSP,IGFBP4,IGFBP5,MAFB,MBTPS1,MMP14,MMP2,MYOZ1,NEDD9,PDE4A,PTGER2,PTGS1,RUNX2,S100A8,SPP1,TGFB1,TNFRSF11B,TP53,TSC22D3,UCP2
ADM2	1.94	other		-1.2	-1.211	0.0271	ARG1,Cox8b,IGFBP3,NDUFB8,UQCRC2
LIN28A		other		-1.941	-1.954	0.0271	AR,ASCL1,CCND1,COL1A2,COL4A5
LINC00963		other	Activated	2.186	2.178	0.0271	BAX,BCL2,CAB39L,TGFB1,TRIB3
PHB	-0.273	transcription regulator		1.013	1.02	0.0271	BAX,BCL2,CCND1,H19,KLK3
Pkg		group		-0.391	-0.396	0.0271	BCL2,CAT,HK2,LEF1,SOD2
RASSF5	0.357	other		-1.387	-1.393	0.0271	EEF2,FAT1,MDK,RAP1A,RPS15
oxymatrine		chemical drug				0.0271	ACE,BAX,BCL2,HMOX1,TGFB1
DDIT3	0.076	transcription regulator		1.177	1.172	0.0271	ATF5,BCL2,CA6,FAP,HMOX1,LCN2,LTBP3,MLF1,PDPN,PLAT,SARS1,TENM4,TGM2,TRIB3,TSC22D3
mir-210		microrna		0.126	0.147	0.0273	ABCB9,ACVR1B,ARG1,CCN2,CDH2,DDOST,EFNA3,EPHA3,FAM3C,MDGA1,NCAM1,NPTX1,VAMP7
CEBPB	0.906	transcription regulator		1.042	1.016	0.0273	ADH7,ALB,ANTXR1,APLN,APP,ARG1,BCL2,CCND1,CEBPB,COL1A2,DAB2,DEGS1,EDIL3,EPHA7,FZD1,GADD45A,H4C9,ID1,IDH3B,IGFBP3,IGFBP4,INMT,IRS1,IRS2,LCN2,LEPR,MGP,MMP11,NDRG4,PPP1R14A,PTGFR,PTGS1,RUNX2,SERPINA1,SGK1,SLC12A2,SPP1,TAC1,TGFB1,TNFRSF19,TP53,TRIB3,VDR
(-)-epicatechin gallate		chemical - endogenous non-mammalian				0.0275	RUNX2,SPP1,WWTR1
2-chloroadenosine		chemical reagent				0.0275	MMP2,TGFB1,TIMP1
AIFM1	-0.344	enzyme				0.0275	BNIP3,NDUFA9,NDUFB6
ANG	0.235	enzyme				0.0275	BAX,BCL2,TP53
ANPEP	0.311	peptidase				0.0275	ANPEP,DPP4,TGFB1
BANP	0.088	other				0.0275	BAX,CCND1,TP53
CDH5	-0.048	other				0.0275	BCL2,CDH2,TP53
CDK7	-0.066	kinase				0.0275	MET,STC2,TGFB1
CRTC3	0.011	other				0.0275	CYCS,Esrra,IDH3A
Cu2+		chemical - endogenous mammalian				0.0275	APP,CCND1,HMOX1
DES	0.006	other				0.0275	ACE,SPP1,TGFB1
DKK2	-0.166	other				0.0275	BCL2,CCND1,SPP1
FBXO2	-1.088	enzyme				0.0275	APP,FBXO2,GRIN2A
HEYL	-0.045	transcription regulator				0.0275	KLK3,MMP2,SMTN
HOXA2	0.008	transcription regulator				0.0275	MEOX1,RUNX2,SIX2
IGF2R	0.057	transmembrane receptor				0.0275	DDAH1,NEDD9,POSTN
LTBP4	0.217	growth factor				0.0275	GREM1,ID1,TGFB1
MAOA	0.056	enzyme				0.0275	BCL2,CCND1,OXT
NDST1	-0.206	enzyme				0.0275	FGF2,FGF9,TGFB1
NEU3	-0.212	enzyme				0.0275	AR,BCL2,RAB25
PIK3CB	0.15	kinase				0.0275	APLN,AR,RPS6
RALBP1	0.134	enzyme				0.0275	COL1A2,GAPDH,MMP2
RPS6KB2	0.128	kinase				0.0275	BCL2,IRS1,TP53
ZNF91	0.019	transcription regulator				0.0275	DDAH1,NEDD9,POSTN
allyl isothiocyanate		chemical toxicant				0.0275	BAX,HMOX1,MMP2
aristolochic acid I		chemical toxicant				0.0275	BCL2,CYCS,HMOX1
aroclor 1221		chemical toxicant				0.0275	AR,LEPR,OXT
aurothioglucose		chemical drug				0.0275	GCLC,HMOX1,LEPR
chlorpyrifos		chemical toxicant				0.0275	CCK,GAL,HMOX1
cinnamon powder		chemical reagent				0.0275	APP,IRS1,IRS2
geneticin		chemical toxicant				0.0275	BAX,PLAT,TP53
methoxychlor		chemical toxicant				0.0275	BAX,HSP90AB1,HSP90B1
mir-217		microrna				0.0275	HMOX1,IRS1,RUNX2
pyrophosphate		chemical - endogenous mammalian				0.0275	COL2A1,ENPP1,SPP1
tyrphostin AG 127		chemical - kinase inhibitor				0.0275	BAX,BCL2,IRAK1
ALOX15		enzyme		0.786	0.78	0.0278	BAX,BCL2,HMOX1,ID3,MMP2,VCAM1
Focal adhesion kinase		group		0.277	0.274	0.0278	BCL2,CDH2,KLK3,MMP2,TP53,VCAM1
MAPK11	0.659	kinase		1.408	1.397	0.0278	BCL2,CALR,HMOX1,TIMP1,TIMP2,VDR
miR-133a-3p (and other miRNAs w/seed UUGGUCC)		mature microrna		-0.386	-0.37	0.0278	BCL2L2,CCN2,KCNH2,NFATC4,RUNX2,SLC2A4
estrogen		chemical drug		-0.344	-0.366	0.0283	ALB,AR,ART3,ATP5PF,BCL2,CCK,CCN2,CCND1,COL14A1,CRABP1,CTSD,FGF7,GAL,HIVEP3,IGFBP4,IGFBP5,IRS1,LCN2,LIF,NAMPT,OXT,PLAT,PTX3,RET,SERPINA3,SERPINE2,SPP1,SSTR3,TNFRSF11B,TP53,VDR
Ap1		complex		1.339	1.32	0.0285	ACE,ADH7,ATP6AP2,CCN2,CCND1,CD44,DUSP6,HMOX1,HSP90B1,IGFBP3,KCNN4,KLK3,MET,MMP2,TGFB1,TIMP1,VCAM1,VDR
HSPA5	0.148	enzyme		-1.873	-1.877	0.0288	ACADVL,APP,BAX,BCL2,BCL2L2,CD47,HSP90B1,WASF3
MEF2A	-0.149	transcription regulator		-0.562	-0.571	0.0288	ACTC1,AQP4,ARHGAP20,CKM,CPT1B,ENO3,SLC2A4,TGFB1
ZAP70		kinase		-0.156	-0.176	0.0295	ALAS1,ANXA1,CLCN1,COL4A5,DNASE1L2,EDIL3,NDUFB6,SPOP,TSC22D3
mir-204		microrna		-1.408	-1.41	0.0295	ACVR1,BCL2,BMPR1B,CAMK2B,LTBP1,MICOS10-NBL1/NBL1,PIK3R1,RUNX2,TGFBR2
27-hydroxycholesterol		chemical - endogenous mammalian		0.064	0.061	0.0297	ACE,ANPEP,APP,SLC2A4
ATR	0.062	kinase		1.067	1.067	0.0297	BAX,CDK14,MET,POLI
GC-GCR dimer		complex		1.067	1.054	0.0297	ANXA1,CD163,SLPI,TSC22D3
H1-2	0.078	other		1.165	1.166	0.0297	CCND1,CISH,GADD45A,GAPDH
KIF1B	-0.332	transporter		-0.152	-0.156	0.0297	ASCL1,CCND1,GATA3,SYNM
arecoline		chemical drug		1.172	1.167	0.0297	F2R,HMOX1,SLC2A4,VCAM1
bombesin		chemical - endogenous mammalian		0.655	0.645	0.0297	IGFBP3,KLK3,MET,PMEPA1
mir-196		microrna		-1.067	-1.054	0.0297	ANXA1,BCL2,ERG,HOXD8
sertraline		chemical drug		-0.152	-0.164	0.0297	BCL2,DDIT4,PDE4A,TP53
xanthine		chemical - endogenous mammalian		0.766	0.757	0.0297	ID3,MMP14,MMP2,TIMP2
TNFSF12	0.166	cytokine		1.031	1.021	0.0299	ATP5PO,BCL2L2,CCND1,CYCS,MYH4,PF4,PGAM2,PTX3,S100A8,SIX2,SLC2A4,TIMP1,VCAM1
morphine		chemical drug		0.148	0.14	0.03	AQP4,ARRB1,BAX,BCL2,CCK,CCND1,CDK5,EHMT2,GATA3,GRIN2A,KCNAB2,KCNB1,PLAT,PPP1R14C,SLC1A2,TP53
ADCYAP1		other		-0.26	-0.268	0.031	ACAT1,AGTR2,BCL2,BMP6,CCBE1,CEBPB,CNTNAP4,EDIL3,EGR2,ENPP2,GATA3,GNG8,ID3,KCNN4,LMO1,LUM,MYL10,NPR3,P2RY2,POSTN,RPSA,SERPINA3,SERPINE2,SERPINF1,SLC1A2,TTYH1,UCP2
PAK2	0.009	kinase		1.134	1.136	0.0311	ASS1,GADD45A,ID1,ID3,IGFBP3,IGFBP5,NOX4
PAX5-ELN		fusion gene/product		1.134	1.121	0.0311	IRS1,Ly6a (includes others),LY6D,NKD2,PTGS1,RBMS3,TLE6
ethionine		chemical toxicant		0.378	0.365	0.0311	ANXA1,CD44,LCN2,SPP1,TIMP1,Tpm1,TSPAN8
everolimus		chemical drug		-0.129	-0.13	0.0311	CCN2,CCND1,CEBPB,MMP2,RPS6,SNAI1,SOAT1
PRKCA	-0.134	kinase		0.109	0.099	0.0318	APP,CCN2,CCND1,CYCS,ID1,ID3,IGFBP3,LAMP2,MYLPF,PEG10,RUNX1,RUNX2,S100A8,TP53,VCAM1
NR3C1	0.12	ligand-dependent nuclear receptor		0.628	0.625	0.0324	ACAT1,ANGPTL7,ANXA1,APP,AQP5,ARRB1,BAX,BCL2,BCL2L2,CAT,CCND1,CD47,CEBPB,CRABP2,CSRNP2,DDIT4,DEGS1,DNAJC15,DPP7,DYNLL2,ENC1,F2R,GADD45A,GATA3,GEM,GNMT,GRIN2A,HSP90AB1,IL33,IP6K3,KLK3,LIF,MAGI3,MAX,MLF1,MPC2,Mt1,MYOC,NAMPT,PDPN,PIK3R1,PLEKHF1,PPP1R13L,PPP1R14C,PRPH,PTP4A2,RBMS3,RELT,RUNX2,SERPINA1,SGK1,SLC38A1,SPP1,STK17B,TAC1,TGFB1,Tgtp1/Tgtp2,TIMP1,TNFAIP1,TNFAIP2,TNFRSF11B,TP53,TRIB3,Trim30a/Tri…
N-nitro-L-arginine methyl ester		chemical drug		0.887	0.887	0.0326	ACE,APLN,BAX,BCL2,BGN,CCN2,CDK14,COL1A2,HMOX1,TGFB1,TIMP1,TP53,VCAM1
TAF4	0.212	transcription regulator		-1.832	-1.821	0.0326	AR,CCN2,CCND1,CDH11,GAS2,GREM1,LRRC15,LUM,MMP2,RUNX1,SPP1,TGFB1,TGM1
ZFHX3	0.162	transcription regulator				0.0326	ALB,CCND1,CDC14A,EIF3K,GNG8,ID3,PYGM,RASL11B,RPLP2,RPS12,SERPINA1,TAC1,TUBA1A
dopamine		chemical - endogenous mammalian		-0.345	-0.356	0.0326	ADRA2C,BAX,BCL2,BCL2L2,CCK,CDC14A,CLCN3,CTSK,HMOX1,KCNA1,KCNJ12,KCNK1,MAP2,MCHR1,NPR3,PPP1R1B,TAC1
tacrolimus		chemical drug		-0.154	-0.147	0.0327	ABLIM1,APP,BASP1,BAX,BCL2,CCND1,CISH,COL2A1,DPYSL5,ELL2,ENC1,ID3,IGFBP4,IL33,KCNA1,MAF,NFATC4,NPTX1,PTGER2,RUNX2,SLC8A3,SLIT2,SOD2,SPP1,TLE1,TNC,WLS
TSC22D3	0.272	transcription regulator		1.534	1.538	0.0327	ANXA1,BCL2,CCND1,EDIL3,EGR2,RUNX2,SGK1,TP53	Akt,ERK,NFkB (complex),P38 MAPK,PPARGC1A,RUNX2,SP1,TP53,TSC22D3,estrogen receptor
andrographolide		chemical drug		1.4	1.401	0.0328	AR,BAX,GATA3,HMOX1,TIMP1,VCAM1
histone deacetylase inhibitor		chemical drug		0.816	0.809	0.0328	BAX,BCL2,FGF2,IGFBP3,TGFB1,TP53
2-deoxyglucose		chemical drug		1.624	1.625	0.0329	APP,BCL2,CCND1,DDIT4,HSP90B1,PDIA3,SOD2,SPP1,TP53,TP63	2-deoxyglucose,Akt,FOXM1,MYOD1,NFkB (complex),NR4A3,P38 MAPK,PPARGC1A,RB1,RUNX2,SP1,TP53,YBX1,corticosterone,estrogen receptor
F3	0.384	transmembrane receptor		1.723	1.703	0.0329	ARG1,CCN2,DUSP6,LEF1,MDK,MMP2,PLPP3,TGFBR2,TGM2,VCAM1	Akt,F3,NFkB (complex),PPARGC1A,RUNX2,SP1,TP53
BGN	0.493	other		0.64	0.633	0.033	BAX,CCND1,FBN1,MMP14,RUNX2
EBF2	-0.129	transcription regulator		1.477	1.462	0.033	Cox8b,DIO2,MEOX1,SFRP4,THBS4
FAM3B		cytokine				0.033	GAS2,IGFBP3,IGFBP4,LCN2,LDHA
GRHL2		transcription regulator		1.412	1.404	0.033	BCL2,MMP14,NRP2,TGM1,TP63
mir-124		microrna		0.6	0.611	0.033	BAX,BCL2,PPP1R13L,RUNX2,SLC1A2
N-methyl-D-aspartate		chemical drug		0.868	0.856	0.0332	APP,BAX,CD47,FGF2,GRIN2A,LIF,PSIP1,SLC1A2,SLC7A3
POLR2A	-0.004	enzyme				0.0332	ANO1,ASCL1,CCND1,CYP26A1,EGR2,GAPDH,KLK3,SGK1,STC2
S-nitroso-N-acetyl-DL-penicillamine		chemical reagent		1.924	1.922	0.0332	AQP5,BCL2,BNIP3,HMOX1,MB,SPP1,TGFB1,TIMP1,TP53	AHR,CREBBP,ESR1,FOXM1,Hif1,NFkB (complex),P38 MAPK,PPARGC1A,RB1,RUNX2,S-nitroso-N-acetyl-DL-penicillamine,SP1,TAF4,TP53,YBX1,estrogen receptor
SERPINF1	0.349	other		-0.926	-0.925	0.0332	BAX,BCL2,CCN2,CCND1,LOXL1,SERPINF1,SOD2,TGFB1,TNFRSF11B
reactive oxygen species		chemical toxicant		1.906	1.888	0.0336	BAX,BCL2,CAT,CCN2,FGF2,GADD45A,GCK,HMOX1,PRDX5,SOD2,TGFB1,TP53,UCP2,VCAM1	AHR,Akt,CREBBP,ESR1,MAPK8,NFkB (complex),P38 MAPK,PPARGC1A,RB1,RUNX2,SP1,TAF4,TP53,estrogen receptor,reactive oxygen species
LDL		complex		1.827	1.808	0.0336	BCL2,CAMK2B,CCN2,CCND1,CTSK,EDNRB,GCLC,GJA5,HMOX1,HSP90B1,IBSP,IGFBP3,IGFBP4,LRP1,MLH1,MMP14,MMP16,MMP2,MSC,NAMPT,OSBPL6,PLAT,S100A8,SOD2,TGFB1,TGFBR2,TP53,VCAM1	AHR,ERK,LDL,NFkB (complex),P38 MAPK,PAX5,PPARGC1A,RUNX2,SP1,TP53,estrogen receptor,lipopolysaccharide,reactive oxygen species
CALCA		other		0.687	0.679	0.0341	ALB,AQP2,AQP4,CD44,CTSK,LIMA1,MAX,PALM,PLXDC2,PPP1R1B,RUNX2,SLC2A4
IgG		complex		-1.401	-1.389	0.0348	APP,CALR,CEBPB,CKM,CRABP2,DEGS1,EFNA3,EGR2,FCGR2A,LCN2,Ly6a (includes others),MAF,MAFB,PDPN,PPIF,SERPINB7,SERPINF1,SLC40A1,TAPBP,TGFB1,TNC,TOB1,UGCG,VCAM1
CD3		complex		-1.055	-1.09	0.035	ACPP,ALAS1,ANXA1,BCL2,CAMK2A,CCND1,CD28,CD44,CISH,CLCN1,COX7A1,CS,CYC1,CYCS,DDT,DNASE1L2,DPP4,DPYSL5,EDIL3,EGR2,GABARAPL2,GAPDH,GATA3,H19,HIVEP3,HSP90B1,ID3,IGFBP5,JAK1,KCNN4,LEF1,LNPEP,LRP1,LTBP1,Ly6a (includes others),MAF,MMP2,NAGA,NAMPT,NDUFB6,NPM1,OGN,P2RY2,PDE4A,PDIA4,PGAM1,PTP4A2,RNF128,SLC5A3,SLPI,SMS,SPOP,SYT7,TFRC,TGFB1,TGM2,TRIM5,VIPR1
n-nitrosomethylbenzylamine		chemical toxicant				0.035	BAX,CCND1,CD44,CIB2,DNASE1L2,DSC3,GREM1,HMOX1,LAMP2,LEPR,PHGDH,PTGER2,PTGS1,RAB1A,SCEL,TMED2,USO1
WT1		transcription regulator		-0.819	-0.824	0.0352	AMHR2,ANPEP,ANXA11,APRT,BCL2,CCN2,CCND1,CKM,CTSV,DDX3X,FGF1,FGFR1,HSP90B1,HSPG2,LRP1,MBTPS1,MMP14,MMP2,PDIA4,PHLDA1,RPL19,SLC20A1,TFAP2A,TGFB1,TMA16,VDR
ciglitazone		chemical drug		0.867	0.869	0.0354	BAX,BCL2,CAT,CCND1,KLK3,LCN2,MMP2,NOX4,SLC9A1,TGM1,VCAM1
EFNA4	0.551	kinase		-0.239	-0.235	0.0358	CCN2,CRABP2,DCBLD2,DUSP6,PLAT,SLC20A1,TGM1
PRKN	-0.028	enzyme		-0.944	-0.937	0.0358	CCND1,Cox5b,LEF1,NDUFS3,NDUFV2,PDHA1,TP53
SIRT3	-0.209	enzyme		1.412	1.413	0.0358	BAX,CAT,CYCS,DIO2,SOD2,TFRC,TP53
TCR		complex		1.883	1.861	0.0362	ABLIM1,ALDOA,ALOX12,ATP5PB,BCL2,CCND1,CD28,CD44,CISH,CS,EGR2,ELL2,GADD45G,GATA3,HSP90B1,ID3,MAF,PDIA4,PGAM1,PGK1,PIK3R1,RASGRP1,RNF128,RPL17,RPL4,RPL9,RPS15,RPSA,RUNX1,SERPINA3,SOX12,SPP1,TGFB1,TOB1,TPI1,TSC22D3,UQCRC1,VDR	AHR,NFkB (complex),P38 MAPK,PIK3R1,PPARGC1A,RUNX2,SP1,TCR,TP53,estrogen receptor
IKZF1	-0.192	transcription regulator		-1.001	-0.983	0.0362	ACP1,ANTXR1,CITED2,CTNND1,DEPP1,FGFR1,GATA3,GRN,HK2,LHFPL2,LRP1,MAN1C1,MAP2,MMP14,NCAM1,PFKL,PGAM1,RUNX1,SASH1,SGSH,SLC19A1,SLC27A3,SLPI,SPPL2A,SPSB1,TENM3,VIPR1
pyrrolidine dithiocarbamate		chemical reagent		-0.927	-0.91	0.0364	ANXA1,ASS1,BCL2,CCN2,GCLC,HMOX1,MMP14,MMP2,PGK1,RACK1,SLC1A2,SLC2A4,SOD2,VCAM1
CXCL8		cytokine		1.21	1.199	0.0365	ANXA1,AR,BAX,BCL2,CD44,COL12A1,HSPG2,KLK3,MMP2,VCAM1
cyclophosphamide		chemical drug		-0.113	-0.123	0.0365	BCL2,CAT,CD44,FCGR2A,Ly6a (includes others),SPP1,TGIF1,TIMP1,TSPAN8,UGCG
CCN5	-0.361	growth factor		-0.522	-0.518	0.037	CCN2,CD44,GATA3,PROCR,SDC4,SLC2A4,TGFB1,TGFBR2
celecoxib		chemical drug		1.942	1.948	0.0371	APP,AR,BAX,BCL2,CCND1,CTSK,GADD45A,HMOX1,MET,MMP2,SLC25A4,TGFBR2,TP53,TP63,VCAM1	AHR,Akt,CREBBP,ESR1,NFkB (complex),PARP1,PPARGC1A,RB1,RUNX2,SP1,TAF4,TP53,celecoxib,doxorubicin,estrogen receptor
gemcitabine		chemical drug		1.211	1.203	0.0371	BCL2,CCND1,CD47,GLB1,HMOX1,MDK,PTGS1,SLC29A1,TP53
GMNN	-0.304	transcription regulator		-0.302	-0.281	0.0372	ACVR1,CHST15,CITED1,CYP26A1,FGF2,FRZB,IER5,IRS1,IRX3,TNFRSF19,TP53,WLS
PAX3-FOXO1		fusion gene/product		1.393	1.394	0.0373	ADRA2C,CADM1,CCND1,CCNG1,CKM,EEF2,EPB41L3,EYA2,GAREM1,GREM1,HMOX1,IGFBP5,IRS1,MEOX1,MET,RPL35,RPS6,SPP1,TIMP2
CAV1	-0.095	transmembrane receptor		0.664	0.657	0.0375	ACVRL1,ARG1,CCND1,CD276,CTSD,FGF2,GRIN2A,HK2,HMOX1,ID1,NPM1,RPL17,RPS9,SLC12A2,SLC20A1,SNAI1,TP53,VCAM1
CX3CL1	0.263	cytokine		1.542	1.537	0.0375	ADAMTS1,BMP6,CRABP2,FGF2,Foxp2,HMOX1,LPAR1,MICOS10-NBL1/NBL1,MMP2,NDNF,POSTN,PYGM,SDK2,SERPINF1,SPP1,TGFB1,TIMP1	CX3CL1,ERK,NFkB (complex),P38 MAPK,RUNX2,SP1,TP53,estrogen receptor
2-acetylaminofluorene		chemical toxicant		-0.832	-0.842	0.0377	BCL2,CCND1,NOTCH2,TP53
CD81	0.1	other		1.936	1.929	0.0377	ID1,MMP14,MMP2,VCAM1	Akt,CD81,Collagen type I (complex),NFkB (complex),PPARGC1A,RUNX2,SP1,TP53
CREB3L1	0.339	transcription regulator		0.152	0.143	0.0377	COL1A2,HSP90B1,PAPSS2,SPP1
FNDC5	-0.497	other		0.068	0.056	0.0377	Cox8b,FNDC5,RUNX2,SPP1
HULC		other		-0.689	-0.693	0.0377	BAX,BCL2,CDH2,SNAI1
IFITM1		transmembrane receptor		-1	-1.01	0.0377	EDIL3,LEPR,SERPINE2,TP53
ITGB4	0.029	transmembrane receptor		0.313	0.307	0.0377	BAX,CCND1,ENPP2,TP53
LOX	-0.545	enzyme				0.0377	BCL2,PDGFRB,SNAI1,TP63
NMDA Receptor		complex		0	-0.011	0.0377	CAMK2A,GRIN2A,NCAM1,TAC1
STIM1	-0.245	ion channel		-1	-1.002	0.0377	AQP5,GCLC,GSTO1,HMOX1
acyclic retinoid		chemical drug		0.167	0.176	0.0377	CCND1,COL1A2,PDGFRB,TIMP2
hemoglobin		complex		0.983	0.974	0.0377	CD163,HMOX1,SLC40A1,TFRC
lycopene		chemical drug		0	0.007	0.0377	BAX,BCL2,CCND1,TP53
superoxide		chemical - endogenous mammalian				0.0377	HMOX1,ID3,SOD2,TIMP1
KITLG	-0.043	growth factor		1.6	1.583	0.038	BCL2,CCN2,Cd24a,CISH,CMA1,DALRD3,EDNRB,EEF1A1,F2R,FGFR1,HMOX1,IGFBP3,MAPK11,MMP2,MYOM1,N4BP2L1,NPM1,OSBPL1A,PF4,PGLS,PIK3IP1,RCC2,RNF128,Rps3a1,RPS6,TPSAB1/TPSB2,TSC22D3,UCP2,UGCG	ERK,ESR1,KITLG,MAPK8,NFkB (complex),PI3K (complex),RUNX2,SP1,TP53,estrogen receptor
ASXL2	-0.115	other	Inhibited	-2.449	-2.466	0.0384	Cox8b,FAM162A,GPD2,HK2,PGK1,SLC2A4
CDC42		enzyme		-0.555	-0.562	0.0384	CCN2,CCND1,CKM,COL2A1,TGM2,TP53
CHADL	0.241	other		-0.816	-0.814	0.0384	CADM1,COL2A1,IGFBP3,MET,PTX3,VCAM1
TET3	0.013	enzyme		-0.64	-0.65	0.0384	ADCY9,APLN,PHOSPHO1,SFRP4,TBX6,TGM2
caffeic acid phenethyl ester		chemical drug		-0.056	-0.04	0.0385	BAX,BCL2,BCL2L2,CCND1,CCNG1,CD44,HMOX1,MMP14,MMP2,PTGFR,TGFB1,TP53,VCAM1
16,16-dimethylprostaglandin E2		chemical - endogenous mammalian				0.0386	CD44,MMP2,PTGER2
Agtr1b		g-protein coupled receptor				0.0386	CCN2,SLC2A4,VCAM1
BAG3	-0.016	other				0.0386	BCL2,GRN,HK2
BCKDK	-0.147	kinase				0.0386	AQP4,CAT,SOD2
BCO2		enzyme				0.0386	DLAT,HTATIP2,PRKAA2
CTNNBIP1	-0.124	other				0.0386	CCND1,KLK3,NEDD9
DDR2	0.15	kinase				0.0386	MMP14,MMP2,SNAI1
EFNB1	0.061	other				0.0386	BCL2,EPHB2,EPHB3
FRMD6	0.086	other				0.0386	CCN2,FGF1,IGFBP3
H3C14		other				0.0386	PIK3R5,RUNX1,THBS4
HSD11B2	0.628	enzyme				0.0386	CCN2,IBSP,TSC22D3
L-N6-(1-iminoethyl)-lysine		chemical reagent				0.0386	HMOX1,IRS1,TGFB1
LTB4R2	0.458	g-protein coupled receptor				0.0386	AR,MMP2,NOX4
LUM	1.079	other				0.0386	KERA,MMP14,TGFB1
PA2G4	0.172	transcription regulator				0.0386	AR,KLK3,PDPN
Pde		group				0.0386	ATP5F1A,HMOX1,PTGS1
SORT1	-0.08	g-protein coupled receptor				0.0386	GRN,SLC2A4,VAMP7
U46619		chemical reagent				0.0386	MMP14,NOX4,TIMP2
UCHL3	-0.152	peptidase				0.0386	BAX,SLC2A4,TP53
candesartan cilexetil		chemical drug				0.0386	NOX4,NPR3,TGFB1
clioquinol		chemical drug				0.0386	APP,CCND1,TP53
cyproterone acetate		chemical drug				0.0386	AR,CCND1,KLK3
darglitazone		chemical drug				0.0386	IRS2,SLC2A4,UCP2
flufenamic acid		chemical drug				0.0386	AR,KLK3,VCAM1
maxacalcitol		chemical drug				0.0386	ALB,TGFB1,VDR
miR-126a-3p (and other miRNAs w/seed CGUACCG)		mature microrna				0.0386	IRS1,PIK3R2,VCAM1
propargylamine		chemical reagent				0.0386	BAX,BCL2,BCL2L2
sphingosylphosphocholine		chemical - endogenous mammalian				0.0386	DUSP6,TGM1,TGM2
ANGPT2	-0.184	growth factor		1.389	1.369	0.0388	ADA,ARHGEF2,BCL2,CALR,CAT,CD163,CEBPB,COL1A2,EEF1B2,FGF7,HMOX1,LEPR,MMP2,NOX4,PDGFRB,PDIA3,PHLDA1,POSTN,RPS6,SNAI1,SOD2,TGFBR2,TP53,VCAM1
RAF1	-0.236	kinase		-0.414	-0.44	0.0388	ACOT7,AMD1,ANXA1,BCL2,CCND1,CD44,DCBLD2,DIO2,DUSP6,GRN,ID3,IGFBP3,LDHA,LIF,LIFR,MCF2L,MET,PHLDA1,PLAT,RET,SERPINB7,TGM2,TIMP1,Tpm1
CDC73	-0.111	other				0.0397	APP,CCND1,H19,IGFBP4,RUNX1
PROX1	-0.162	transcription regulator		1.566	1.566	0.0397	HOXD8,LYVE1,MYL1,TNNI2,TNNT3
letrozole		chemical drug	Activated	2.219	2.222	0.0397	BAX,BCL2,CCND1,LIF,TP53	ESR1,NFkB (complex),PARP1,SP1,TP53,estrogen receptor,letrozole
miR-18a-5p (and other miRNAs w/seed AAGGUGC)		mature microrna		-0.391	-0.376	0.0397	CCN2,CCND1,CTDSPL,SOX6,TP63
staurosporine		chemical - kinase inhibitor		1.52	1.523	0.0399	APP,BCL2,CCND1,CD28,CKM,COL1A2,FCGR2A,H19,HMOX1,IGFBP5,NEDD9,PLAT,SERPINA3,TP53,VDR	AHR,ESR1,FOXM1,MAPK8,NFkB (complex),P38 MAPK,PARP1,PPARGC1A,RB1,RUNX2,SP1,TP53,YBX1,estrogen receptor,staurosporine
TNFRSF1A	0.052	transmembrane receptor		0.484	0.479	0.04	ABCG4,AQP5,CCN2,CD44,CDH2,CEBPB,CLCN3,DIO2,GATA3,LCN2,MMP14,MMP2,SOD2,SOX6,TFRC,TGFB1,TLCD4,VCAM1
RXRA	-0.058	ligand-dependent nuclear receptor		-0.532	-0.537	0.0401	ABCB4,APP,CAT,CCND1,CD109,CPT1B,CRABP2,CYP26A1,FABP3,FLRT3,FSTL1,GCK,GCLC,HMOX1,HOXD10,LCN2,MGP,MMP11,MMP2,NDUFC2,NEDD9,RBP1,RET,RXRG,S100A8,SEMA4D,SLC2A4,SPP1,STRA6,TFAP2A,TGFB1,VDR
ADORA2A	0.13	g-protein coupled receptor		0.606	0.602	0.0401	APP,ATP8A1,Cd24a,CD28,EEF2,EGR2,GABRB3,GAPDH,GNG7,HMOX1,KCNB1,PGAM1,PPP1R1B,SYT11,TGFB1,TSC22D3
BSCL2	0.142	other				0.0403	CCND1,CYFIP2,GCK,GREM1,IGFBP5,IL33,PTGS1,SLC2A4,SLPI,TIMP1
DMP1	0.885	other		1.073	1.081	0.0409	ADAMTSL2,Cbr2,F13A1,FGF1,LIPG,RUNX2,SPP1
FASLG		cytokine		-1.109	-1.112	0.0409	BAX,BCL2,CD44,EGR2,RUNX2,TGFB1,TNFRSF11B
HR	-0.104	transcription regulator		1.342	1.343	0.0409	AMD1,ANO1,COL25A1,CYP2F1,KLK3,LEF1,VDR
HRH3		g-protein coupled receptor				0.0409	CITED1,NPR3,PCOLCE2,RBP4,S100A8,SERPINA3,SLPI
TFAP4	0.774	transcription regulator		0.281	0.281	0.0409	CD44,CDH2,ID1,LEF1,LIF,MLF1,SNAI1
methyl methanesulfonate		chemical toxicant		0.798	0.783	0.0409	CCNG1,CTSD,GADD45A,GADD45G,LIF,SNAI1,TP53
ETS1	-0.222	transcription regulator		0.802	0.779	0.0409	ANPEP,BAX,CCN2,CCND1,CCNG1,CD44,CITED2,COL1A2,COL2A1,EEF1D,FCGR2A,HMOX1,JAK1,MET,MMP2,PEG10,PF4,RUNX1,RUNX2,SERPINB6,SNAI1,SPP1,TGFBR2,TP53
NFATC2	0.172	transcription regulator		0.71	0.694	0.0409	ACPP,AQP5,CDH2,CISH,CITED2,COL2A1,DAB2,EGR2,ENPP2,FGL2,GATA3,GDF5,Iigp1,LDHA,MAF,NAA80,NOX4,PLAT,PTPRS,RAB10,SLC3A2,SNAI1,TGFB1,TLE4
1-O-hexadecyl-2-N-methylcarbamol-sn-glycerol-3-phosphocholine		chemical - endogenous mammalian				0.0416	MMP14,MMP2
ANKH	0.274	transporter				0.0416	COL2A1,SPP1
ARF1	-0.082	enzyme				0.0416	CCND1,MCM6
ARLNC1		other				0.0416	AR,KLK3
ARX		transcription regulator				0.0416	CCK,LHX8
C1GALT1	-0.124	enzyme				0.0416	BAX,BCL2
CASP6	0.089	peptidase				0.0416	ARG1,MMP2
CDC25B	0.088	phosphatase				0.0416	CCND1,TP53
CGP 74514A		chemical - kinase inhibitor				0.0416	CCND1,TP53
COL1A2	-0.453	other				0.0416	COL1A2,TGFB1
D-2-amino-5-phosphonovaleric acid		chemical reagent				0.0416	APP,CAMK2B
DDIT4	0.707	other				0.0416	GRN,TP53
DEETGE-CAL-Tat		chemical reagent				0.0416	HMOX1,SOD2
DIM-C-pPhCO2Me		chemical reagent				0.0416	CDH2,SNAI1
ELMO1	0.068	other				0.0416	NOX4,TGFB1
FGF16	0.461	growth factor				0.0416	MMP2,SNAI1
FZD7	0.153	g-protein coupled receptor				0.0416	CCND1,CD44
GAS7	-0.121	transcription regulator				0.0416	RUNX2,SPP1
GNRH2		other				0.0416	RPLP2,RPSA
HK2	-0.508	kinase				0.0416	NDUFB8,UQCRC2
ILX-23-7553		chemical drug				0.0416	BCL2,CCND1
KMT5B	-0.07	enzyme				0.0416	SGK1,TSC22D3
LETMD1	0.096	other				0.0416	BAX,TP53
NET1	-0.064	other				0.0416	CDH2,MMP14
NUAK1	0.133	kinase				0.0416	MMP14,NDUFS4
NUBPL	-0.121	other				0.0416	NDUFS1,NDUFS3
PF-8380		chemical reagent				0.0416	ENPP2,SLC2A4
PLAC8		other				0.0416	CCND1,TP53
PLAGL2	0.086	transcription regulator				0.0416	BNIP3,LDHA
PPP2R2A	-0.218	phosphatase				0.0416	FAP,SERPINE2
RAPGEF4	0.279	other				0.0416	CTSK,SPP1
RCHY1	-0.083	enzyme				0.0416	KLK3,TP53
RFXANK	0.012	transcription regulator				0.0416	COL1A2,EPHA3
S-18886		chemical drug				0.0416	ALOX12,TGFB1
SDHA	-0.383	enzyme				0.0416	HMOX1,SLC2A4
SKL-2001		chemical reagent				0.0416	ACADVL,CPT1B
SLC39A4	1.018	transporter				0.0416	CCND1,Mt1
SNHG1		other				0.0416	BAX,TP53
SP6		transcription regulator				0.0416	LEF1,TGFBR2
SUCNR1	0.42	g-protein coupled receptor				0.0416	MYH1,MYH4
TEX11		other				0.0416	BAX,CCND1
TIAM1	0.038	other				0.0416	LEF1,TIMP1
TRIM29	2.966	transcription regulator				0.0416	CD44,SNAI1
TRU-TCA1-1		other				0.0416	ARG1,PVALB
VAMP8	-0.076	transporter				0.0416	AQP2,VAMP7
WZ-4002		chemical - kinase inhibitor				0.0416	NDUFB8,UQCRC2
aurothiomalate		chemical drug				0.0416	GCLC,HMOX1
azelaic acid		chemical - endogenous mammalian				0.0416	BAX,BCL2
betaxolol		chemical drug				0.0416	TGFB1,VCAM1
betulin		chemical - endogenous non-mammalian				0.0416	TIMP1,TIMP2
bilobalide		chemical - endogenous non-mammalian				0.0416	BAX,TP53
carboxyamido-triazole		chemical drug				0.0416	CCND1,MMP2
dibutyryl cGMP		chemical reagent				0.0416	AQP5,VCAM1
edratide		biologic drug				0.0416	CD44,EGR2
finerenone		chemical drug				0.0416	LCN2,TNXB
firtecan pegol		chemical drug				0.0416	BNIP3,CA9
givinostat		chemical drug				0.0416	BCL2,TP53
griseofulvin		chemical drug				0.0416	ALAS1,HMOX1
insulin detemir		biologic drug				0.0416	ATP5F1A,Esrra
mercury		chemical toxicant				0.0416	Mt1,PLAT
mini-GAGR		chemical reagent				0.0416	CAT,HMOX1
mir-191		microrna				0.0416	Foxp1,IRS1
oxytetracycline		chemical drug				0.0416	BMP6,ID1
parbendazole		chemical reagent				0.0416	IBSP,SPP1
pemetrexed		chemical drug				0.0416	SLC29A1,TP53
pergolide		chemical drug				0.0416	BAX,TP53
phenylacetic acid		chemical - endogenous mammalian				0.0416	MMP2,TIMP2
prednisone		chemical drug				0.0416	CDH11,KLK3
salvianolic acid A		chemical drug				0.0416	HMOX1,NOX4
sitagliptin		chemical drug				0.0416	CCN2,TGFB1
tirapazamine		chemical drug				0.0416	SPP1,TP53
tozasertib		chemical drug				0.0416	BAX,TP53
tyrosine kinase		group				0.0416	CD44,HMOX1
IDH1	-0.183	enzyme				0.0416	CD47,FBP2,GLS2,PGK1,RAB25,RUNX2,SLC2A4,TP53
HDAC1	-0.137	transcription regulator		-0.392	-0.387	0.0418	AR,BAX,CCND1,CD44,COL1A2,COL2A1,COL9A1,CTSK,EHMT2,ID1,KLK3,LCN2,MAD1L1,Mt1,Mt2,MYH4,RUNX2,SGK1,SLC1A2,SNAI1,SPP1,TBX6,TGFBR2,TGM2,TNFRSF19,TNNI2,TP53,TSC22D3,VDR
LIF	1.05	cytokine		1.761	1.755	0.0418	ANKRD40,CCND1,CEBPB,CISH,COCH,CYP26A1,ENPP2,GAL,HK2,IBSP,LIFR,OMP,PRPH,RET,SERPINA3,SFRP4,SOD2,SPP1,TAC1,TIMP1,TNC,TNFRSF11B,TP53	Akt,LIF,NFkB (complex),PPARGC1A,RUNX2,SP1,TP53
tanespimycin		chemical drug	Activated	2.279	2.291	0.0425	AR,BCL2,CCND1,CYCS,GRN,HSP90AB1,HSP90B1,LDHA,RPL27A,RPL35,RPS8,SLC1A2,SOD2,SYN1	Akt,NFkB (complex),PPARGC1A,RUNX2,SP1,TP53,tanespimycin
SYVN1	0.014	transporter		-1.265	-1.29	0.0429	ADCY9,APP,CCND1,CD44,CRTAP,DAB2,DIO2,KCNN4,LMBRD2,PLPP3,RAB10,RPN2,SLC20A1,SLC27A3,SLC3A2,TFRC,VAMP7
ETV4	0.364	transcription regulator		1.642	1.633	0.0446	BAX,MET,MMP14,SPP1,TGFBR2,WWTR1	CREBBP,ESR1,ETV4,RB1,SP1,TAF4,TP53
Rhox5		transcription regulator		-1.387	-1.384	0.0446	BPGM,Cd24a,CPXM1,IDH3A,TFRC,UNC5C
SETDB1	-0.023	enzyme				0.0446	CADM2,CSMD1,GRID2,GRIN2A,MTMR7,ROBO2
SU6656		chemical toxicant		-0.447	-0.432	0.0446	CCN2,CCND1,Mt1,Mt2,PHLDA1,TNFRSF11B
sildenafil		chemical drug		-1	-0.998	0.0446	APP,BCL2,CEBPB,FGF1,HMOX1,SLC9A1
PPARA	-0.638	ligand-dependent nuclear receptor		-1.646	-1.66	0.0451	ABCB4,ACADVL,ACAT1,APP,ARG1,ASS1,BAX,BCL2,CA9,CAT,CCND1,Cd24a,CEBPB,CPT1B,CS,CTH,CYCS,DIO2,ELOVL3,FABP3,FADS1,FITM1,GCK,GNMT,GPD2,GRIN2A,HMOX1,IGFBP3,IGFBP5,LIFR,LIPG,LY6D,NTHL1,OXT,PAQR9,PHLDA1,PLIN5,RBP4,S100A8,SLC2A4,STBD1,TP63,UCP2,UQCRC1,VCAM1	NFkB (complex),P38 MAPK,PPARA,PPARGC1A,RB1,RUNX2,SP1,TP53,docosahexaenoic acid,estrogen receptor,mono-(2-ethylhexyl)phthalate,palmitic acid
ZBTB16	-0.732	transcription regulator		-0.547	-0.549	0.0454	Cd24a,CD44,EGR2,EYA2,F13A1,F2R,GATA3,HOXD10,HOXD11,HOXD9,ID3,Ly6a (includes others),MAF,PF4,PIK3R1,RUNX2,SPP1,TSC22D3
DICER1	-0.145	enzyme		-0.696	-0.689	0.0454	ANPEP,CAMK2A,CCND1,CCNG1,CD44,DEPP1,EGR2,EPHA3,FCGR2A,H19,ID3,LIPG,LPAR3,MAF,MAP2,PRKD1,PROCR,RASGRP1,RET,RUNX1,SERPINA1,SERPINF1,SFRP4,SLC40A1,TP53,Tpm1
WNT1		cytokine		0.736	0.72	0.0458	CCND1,CCNG1,EEF1A1,EIF3C,EIF4EBP2,ENPP2,GADD45G,GRN,ISLR,LEF1,RPS6,RUNX2,SERPINE2,SPP1,STRA6,TLE1,TP53
acetaminophen		chemical drug		0.091	0.082	0.0458	ABCB4,AK4,ALB,BCL2,CAT,CCND1,CCNG1,CTSV,GADD45A,HMOX1,IGFBP3,IRS1,Mt1,SERPINF1,SSTR3,TUBA1A,VCAM1
Rxr		group		1.98	1.977	0.0458	ALAS1,BCL2,CPT1B,CRABP1,CYP26A1,EEF2,GADD45A,GAS2,MGP,MMP11,MMP2,SEMA4D,SERPINF1,SPP1
FOSL1	-0.323	transcription regulator		-0.277	-0.279	0.0458	CCND1,CD44,EGR2,GCLC,MET,MMP2,RUNX2,SERPINE2,SNAI1
FST	-0.104	other		-1.165	-1.171	0.0458	COX7A1,CYCS,FABP3,LHX8,LIF,MMP2,SERPINA1,SLC2A4,UCP2
birabresib		chemical drug		-1	-0.991	0.0458	ADAMTS1,EPHA7,EYA2,GPR27,MAMDC2,NPTX2,RBMS3,SERPINF1,VCAM1
8-bromo-cAMP		chemical reagent		1.468	1.451	0.046	ACE,APP,AQP2,ARG1,CCN2,CCND1,CEBPB,CTSD,DIO2,FGF2,HSD17B1,PDE4A,PLAT,PTGFR,SGK1,SLC1A2,SLC2A4,SPP1,TGFB1,TIMP1,TIMP2
RELA	0.099	transcription regulator		-0.773	-0.796	0.0464	APP,AR,ATP6AP2,BAX,BCL2,CASR,CCN2,CCND1,CD44,CEBPB,CHI3L1,CITED2,COL1A2,COL2A1,DIO2,FGF2,HMOX1,HSP90B1,ID1,LUM,NAMPT,P2RY2,Pla2g2a,PTX3,SDC4,SERPINE2,SLC1A2,SLC2A4,SNAI1,SOD2,TAC1,TAPBP,TGFB1,TGM2,TNFAIP2,TNFRSF11B,TP53,TP63,VCAM1,WASF3
Smad2/3		group		0	-0.011	0.0465	FAP,GATA3,ID1,RUNX1,RUNX2,TGM2,TNC
fasudil		chemical drug		-0.994	-0.987	0.0465	ARG1,BCL2,CCN2,MMP2,SLC1A2,TGFB1,VCAM1
roscovitine		chemical drug		0.248	0.258	0.0465	APP,AR,CCN2,CCND1,CD44,CDK5,TP53
MMP9	-1.66	peptidase		-0.154	-0.16	0.0465	CCND1,CD44,CTSK,GADD45A,MMP14,MMP2,SDC4,SERPINA1,SERPINE2,TGFB1,TIMP1
dinoprost		chemical - endogenous mammalian		-0.33	-0.336	0.0465	CCND1,FGF2,ID1,ID3,PDIA4,PTGFR,PTGS1,PTX3,RUNX2,SPP1,TGFB1
FHL2	0.275	transcription regulator		-0.236	-0.241	0.0467	ARG1,CCND1,CTSD,IBSP,MRC2,PDGFRB,SPP1,TGFB1
RETN	0.615	other		1.915	1.905	0.0467	CCN2,FABP3,HMOX1,MMP14,PLAT,SLC2A4,SPP1,VCAM1	Akt,IRS1,LDL,NFkB (complex),P38 MAPK,PPARGC1A,RETN,RUNX2,SP1,TP53,estrogen receptor
MDM4	0.189	transcription regulator		-0.305	-0.296	0.0469	BAX,HIPK2,SOD2,TP53
PPP1R15A	0.329	other				0.0469	CA9,CCND1,CEBPB,GADD45A
Ren2		peptidase				0.0469	ALB,CYCS,SPP1,TIMP1
SPZ1		transcription regulator		-0.133	-0.144	0.0469	CCND1,CD44,CDH2,SNAI1
Stat5 dimer		complex		-1.131	-1.138	0.0469	BAX,BCL2,CCND1,IGFBP3
epirubicin		chemical drug				0.0469	BAX,BCL2,CCND1,TP53
farnesol		chemical reagent		0.555	0.545	0.0469	HSP90B1,PDIA4,PHLDA1,TP53
farnesyl pyrophosphate		chemical - endogenous mammalian		0.927	0.924	0.0469	APP,LIPG,TGFB1,VCAM1
idarubicin		chemical drug				0.0469	BAX,BCL2,GADD45A,TP53
mir-154		microrna		-1.95	-1.94	0.0469	BAX,BCL2,CCND1,HMOX1	Akt,NFkB (complex),PPARGC1A,RUNX2,SP1,TP53,mir-154
tauroursodeoxycholic acid		chemical - endogenous mammalian				0.0469	BAX,BCL2,CCN2,OXT
HEXIM1	-0.064	transcription regulator		0.975	0.981	0.0472	ANXA1,CCND1,FGF2,FGF9,TP53
HOXB13		transcription regulator	Activated	2.236	2.23	0.0472	ACPP,AR,CCND1,EPHA7,KLK3
LMX1B	-0.434	transcription regulator		-0.651	-0.664	0.0472	COL2A1,COL4A3,COL4A4,PTX3,SLIT2
NTRK1		kinase				0.0472	BCL2,GADD45A,RET,SOD2,TP53
PRKDC	0.067	kinase		0	-0.007	0.0472	CCND1,EGR2,KLK3,TP53,VCAM1
REN		peptidase		0.447	0.442	0.0472	ACE,APLN,CCN2,FGF2,NOX4
SFN	2.184	other		0.651	0.64	0.0472	CDH2,DSC2,DSG2,PPP1R1B,SGK1
bufalin		chemical reagent		1	1.003	0.0472	BCL2,CCND1,GJA5,MMP2,YWHAQ
miR-22-3p (miRNAs w/seed AGCUGCC)		mature microrna		1.477	1.492	0.0472	ACVR1B,ARRB1,FRAT2,MAX,ZCCHC14
oxazolone		chemical reagent		-0.254	-0.266	0.0472	S100A8,SDC4,SLIT2,TAC1,TPSAB1/TPSB2
FOXA1		transcription regulator		-0.898	-0.9	0.0476	ACTC1,ANXA1,AQP2,ATP5PF,DDIT4,EFHD1,FSTL1,GFRA4,H19,KLK3,MGP,NPTX2,PAM,PDGFRB,PPP1R14C,SLC12A2,SLPI,SPSB1,THBS3
ciprofibrate		chemical drug		0.29	0.291	0.0483	ABCB4,ADAMTS1,AIG1,CAT,CPOX,CTSV,CYP26A1,DPP4,ELOVL3,GNMT,LCN2,LY6D,MYH1,PHLDA1,RPL12,SERPINA1,SLC37A4,Vnn3
paclitaxel		chemical drug		0.038	0.031	0.0487	ARHGEF2,BAX,BCL2,CACNB3,CCN2,CCND1,CCNG1,CD44,CD47,DDAH1,DUSP6,ENPP2,FLT3LG,GRINA,HSP90AB1,IGFBP3,KCNN4,KCTD2,KLK3,NREP,NXPH4,PHGDH,PHLDA1,SLC12A2,SOD2,TFAP2A,TGFBR2,TP53,UGCG,WWTR1
Bay 11-7082		chemical - kinase inhibitor		-0.319	-0.301	0.0488	CCND1,CD44,CHI3L1,CITED2,CREB3L3,GLRB,HMOX1,MMP2,SOD2,VCAM1
isotretinoin		biologic drug		0.775	0.761	0.0488	BCL2,CRABP2,GATA3,IGFBP3,LCN2,RBP1,SERPINA3,TFRC,TNFAIP2,VCAM1
linoleic acid		chemical - endogenous mammalian		0	-0.008	0.0488	APP,CCK,CD47,CPT1B,HSP90B1,PLIN5,S100A8,SLC2A4,UCP2,VCAM1
SUZ12	-0.206	enzyme				0.0488	ANXA8/ANXA8L1,CBX6,CNTFR,CYP26A1,EPHA1,H19,HOXD10,IGFBP3,IRX3,KCNA1,LITAF,MMP2,SNAI1,TGFB1,TNFAIP2,TNFRSF11B,VAMP7
cholecalciferol		chemical - endogenous mammalian		1.136	1.123	0.0493	BCL2,CEBPB,CTSK,F13A1,IGFBP3,PDGFRB,PVALB,RUNX2,SLC20A1,SPP1,TGFB1,TGFBR2,TNFRSF11B,VDR
GSK3B	-0.014	kinase		1.243	1.245	0.0494	APP,AQP2,AR,BAX,BCL2,CCND1,CDH11,CKM,IRS2,LCN2,SNAI1,SPP1,SYN1,TP53,TP63
benzo(a)pyrene		chemical toxicant	Activated	2.078	2.067	0.0556	ANXA1,ASPN,BAX,BCL2,CDK14,FGF9,FZD1,GCLC,HK2,HMOX1,LIMK2,MAF,MAP2K6,Mt2,PPIF,PPP1R3C,PRKD1,PTGER2,SERPINA1,SFRP4,ST8SIA5,TGFB1,TNFAIP2,TP53
NCOA3	-0.119	transcription regulator		-1.957	-1.975	0.0562	BCL2,CCN2,CCND1,FGF2,HK2,HMOX1,IGFBP3,IRS1,LDHA,OXT,PGK1,SLC16A3
CSNK2A1	-0.115	kinase	Inhibited	-2	-2.002	0.0571	CCND1,DUSP6,TP53,TP63
EIF2AK2	-0.015	kinase		1.757	1.739	0.0599	ARG1,BAX,BCL2,CCND1,CEBPB,IRS2,NEDD9,NNMT,SOD2,TP53,TUBA1A
MAX	-0.365	transcription regulator	Inhibited	-2.216	-2.211	0.0599	ACTC1,AR,BAX,CYCS,GADD45A,HK2,ID1,LAMP2,NPM1,PDGFRB,SCPEP1
PRKCD	-0.074	kinase	Activated	2.02	2.004	0.0599	BCL2,BNIP3,CCND1,CEBPB,COL1A2,DUSP6,FBN1,FZD1,GEM,HJURP,LIF,LIPG,MMP2,NOTCH2,TNFRSF11B,TP53,TPBG,UGCG,VCAM1
NRIP1	-0.327	transcription regulator	Activated	2.412	2.42	0.0614	CCND1,COX7A1,Cox8b,CPT1B,CRABP1,IDH3A,PTX3,SLC16A10,SLC25A19
CRTC2	0.108	other	Inhibited	-2	-2.013	0.0644	BCL2,CCND1,CYCS,Esrra,IDH3A
MSTN	0.226	growth factor	Activated	2.032	2.029	0.0659	CKM,CTSV,IGFBP3,IGFBP5,MYH4,TGFB1,TNC
NOX4	1.846	enzyme		1.817	1.811	0.0665	CD44,CS,CTH,MMP2,NOX4,TP53
lactacystin		chemical - protease inhibitor	Activated	2.048	2.037	0.0667	APP,AQP2,CCND1,CPOX,CTSD,GATA3,GCLC,HMOX1,HSP90B1,IGFBP5,IRS1,IRS2,ITPRID2,MMP11,MMP2,NEDD9,RPLP2,RUNX2,SLC3A2,TP53,VDR
CYB5R4	0.093	enzyme		-1.998	-1.986	0.0685	GCLC,HMOX1,Mt1,Mt2
TERF2IP	-0.01	other	Activated	2	1.99	0.0685	CA6,CCN2,H19,NNMT
coenzyme Q10		chemical drug		-1.98	-1.975	0.0685	BAX,BCL2,GRIN2A,HMOX1
cyclooxygenase		group	Activated	2	1.99	0.0685	ARG1,HMOX1,LIF,TAC1
F2R	1.54	g-protein coupled receptor		1.961	1.946	0.0703	CCN2,CCND1,CD44,CDH11,COL13A1,F2R,HMOX1,MMP2,PLAT,TGM2,TP53,VCAM1
MED13	-0.115	transcription regulator	Activated	2.611	2.619	0.0734	BPGM,CIB2,GPD2,LIF,PGAM2,PHKA1,SLC2A4
ZC3H12C	-0.006	other	Activated	2.2	2.215	0.0742	9930111J21Rik1/Gm12185,GBP6,Iigp1,Ly6a (includes others),Tgtp1/Tgtp2
BMPR1A	-0.083	kinase		-1.767	-1.777	0.075	BMPR1B,COL2A1,IBSP,ID1,ID3,SOX6
H2AX	-0.127	transcription regulator	Inhibited	-2	-2.013	0.075	ATP5F1A,MLH1,NDUFB8,SFRP4,SLC2A4,UQCRC2
GLI2	0.495	transcription regulator		-1.99	-2.001	0.0799	ATP2A1,BCL2,CCND1,GATA3,HK2,KLK3,MEOX1,MLH1,RUNX2,SNAI1,SPP1,UGCG,VDR
salinosporamide A		chemical drug		1.953	1.962	0.0809	BAX,BCL2,CCND1,SNAI1
REG3A		enzyme	Activated	2.2	2.213	0.0847	9930111J21Rik1/Gm12185,GBP6,Iigp1,Ly6a (includes others),Tgtp1/Tgtp2
Gcg		other	Activated	2.121	2.113	0.0849	ARG1,ASS1,CTH,GAS2,GLS2,GNMT,NNMT,TFRC
MIR17HG	-0.08	other	Inhibited	-2.688	-2.669	0.0889	APP,CCND1,FZD1,HSPG2,LRP1,LRP4,LTBP1,NOTCH2,PTK7,RGMA,TBX6,TGFBR2,TGIF1,TMEM64
PIK3CG	-0.196	kinase	Activated	2.904	2.909	0.0923	ARG1,BCL2,CD47,CTSK,ENPP1,GBP6,HMOX1,Iigp1,LMO1,TGFB1,Tgtp1/Tgtp2,Trim30a/Trim30d
ANGPT1	0.015	growth factor	Inhibited	-2.213	-2.216	0.0937	ADAMTS1,APLN,BAX,BCL2,CCND1,VCAM1
Abcb1b	0.189	transporter		-1.964	-1.951	0.0944	APP,CTSA,DDIT4,TP53
CCN3	1.24	growth factor		-1.941	-1.939	0.0944	CCN2,GREM1,MMP2,RUNX2
GF 120918		chemical reagent		1.982	1.969	0.0944	APP,CTSA,DDIT4,TP53
piceatannol		chemical - endogenous non-mammalian		1.964	1.971	0.0944	BCL2,CCND1,HMOX1,TIMP2
ANXA2	0.019	other		-1.948	-1.944	0.096	BAX,GADD45A,IGFBP3,MMP2,TP53
GAPDH	-0.583	enzyme	Inhibited	-2.169	-2.163	0.096	ENPP1,GAPDH,GEM,KLK3,SPP1
CAT	0.26	enzyme	Inhibited	-2.586	-2.577	0.0985	BAX,GCLC,HMOX1,TIMP1,TNC,TP53,VCAM1
sunitinib		chemical drug	Inhibited	-2.613	-2.607	0.0985	ADAMTS8,CCN2,CD44,MET,RUNX1,TIMP2,TNC
pirinixic acid		chemical toxicant	Inhibited	-2.219	-2.245	0.099	ABCB4,ACADVL,ACAT1,ALAS1,BAX,BNIP3,BPGM,CAT,CCK,CCND1,Cd24a,CDH2,CPT1B,CREB3L3,DLAT,DPP4,ELOVL3,ETFDH,FADS1,FBP2,GADD45A,GAPDH,GPD2,GRHPR,HMOX1,Hsdl2,KLF11,LCN2,LIFR,LY6D,MET,PFKL,PGM1,PHLDA1,PLIN5,PTPRS,RXRG,SLC2A4,TIMM17A,TP53,UCP2,VCAM1
ETV6-RUNX1		fusion gene/product	Inhibited	-2.253	-2.228	0.0994	ABLIM1,ABR,ACVR1B,ADCY7,ANO1,Bst2,CAPZA2,CD164,CD44,CDH2,CYFIP2,CYSLTR1,DDIT4,DGLUCY,EPHA7,FGFR1,GATA3,H4C9,IRX3,JAK1,MMP2,PDGFRB,RGL1,RPS6,SDK2,SORBS2,SPP1,STK17B,TGFB1,TSC22D3
NR4A2	0.303	ligand-dependent nuclear receptor		-1.756	-1.764	0.101	COL16A1,Cox5b,CPT1B,EIF4EBP2,HMOX1,PRKAA2,PTX3,RET,SLC2A4,TSC22D3
IFNA2		cytokine		1.912	1.891	0.102	ANXA1,ATF5,BAX,BCL2,CCDC92,CD28,CISH,DPP4,ENPP1,EPB41L3,FGF2,GAB3,GEM,MET,NPTX2,PLAT,RIPOR2,SHFL,TGM2,TP53,VCAM1
fluocinolone acetonide		chemical drug	Inhibited	-2.236	-2.233	0.104	ANGPTL7,KCNB1,MYOC,PF4,RASL11B,RUNX2
RTN4	-0.237	other	Inhibited	-2.449	-2.454	0.108	APP,CAPZA2,DPYSL5,FGF1,MAP2,Tpm1,YWHAQ
bafilomycin A1		chemical drug	Activated	2.186	2.181	0.108	GRN,KCNH2,TFRC,TIMP2,TRIB3
methylselenic acid		chemical reagent		1.943	1.947	0.112	ACPP,ADAMTS1,AR,ATF5,CADM1,CCND1,CD44,CDK5,CREB3L2,GADD45A,HOXD8,HSP90B1,ID1,ID3,JAK1,KLK3,MAPK14,MATN2,MCM6,NREP,PDIA4,RAB31,SGK1,UGDH,WASF1
INHBA	0.14	growth factor	Activated	2.635	2.621	0.119	ACVR1,ACVR1B,BAX,BCL2,CCN2,CPNE8,F13A1,ITGA11,MAD1L1,MAF,MAFB,MGP,MMP2,S100A8,SLC1A2,TIMP1,Tpsab1,TPSAB1/TPSB2
FUS-DDIT3		fusion gene/product	Inhibited	-2.236	-2.231	0.121	CCN2,LCN2,NAMPT,PTX3,TSC22D3
Gm15807/Hmgn5	-0.116	other	Inhibited	-2	-2.01	0.121	ATP2A1,ATP6AP2,TNNC2,TNNI2,TNNT3
mitoxantrone		chemical drug	Activated	2.186	2.181	0.121	BAX,COL1A2,KLK3,TP53,TP63
STAT5B	-0.227	transcription regulator		-1.976	-1.979	0.123	ACTC1,AR,BAX,BCL2,CCND1,CD276,CISH,COX7A1,Cox8b,CYP26B1,ELOVL3,GAB3,GADD45A,GCK,HEXA,KSR1,MAF,MB,MOXD1,MPC2,MYH1,MYL1,NNMT,NOX4,NRP2,PPP1R3C,SLC15A5,SLC47A1,SLN
DTX1	-0.263	transcription regulator		-1.982	-1.986	0.124	DUSP6,HIGD1A,SNAI1,SPP1
rifaximin		chemical drug	Inhibited	-2	-2.002	0.124	ANXA11,PGK1,RACK1,RPSA
tosylphenylalanyl chloromethyl ketone		chemical - protease inhibitor	Inhibited	-2	-1.989	0.124	BCL2,GCLC,MMP2,VCAM1
zerumbone		chemical - endogenous non-mammalian	Activated	2	2.006	0.124	BCL2,CCND1,HMOX1,TP53
Firre	0.283	other	Activated	2.333	2.317	0.135	EEF1D,EHMT2,FOXP4,PALM,PGLS,PRR5,RPS15,RPSA,VCAM1
GCG		other		-1.765	-1.775	0.135	BCL2,CCN2,CEBPB,IGFBP4,PDHA1,PPP1R3C,SLC2A4,TGFB1,VCAM1
PRKAA		group	Activated	2.41	2.413	0.138	AR,BAX,BCL2,KLK3,SNAI1,TP53
ATG7	0.242	enzyme	Inhibited	-2.469	-2.471	0.144	ACAT1,CCN2,CD44,CDH2,HK2,PFKL,TGFB1,TGFBR2,TP53
cardiotoxin		chemical - other		1.89	1.872	0.147	APRT,ATP6V1A,BGN,CCND1,COL1A2,CTSV,EDNRB,FGFR1,GM2A,H19,LTBP1,MMP2,NPM1,PGAM1,RPSA,SPP1,TIMP1,UCP2
ASXL1	0.151	transcription regulator	Activated	2.449	2.463	0.15	Cox8b,FAM162A,GPD2,HK2,PGK1,SLC2A4
SPIB		transcription regulator	Activated	2.343	2.325	0.153	BMP6,Bst2,CLEC4M,COL2A1,EGR2,GEM,KLK3,TENM4,TNFRSF11B
2,4,5,2',4',5'-hexachlorobiphenyl		chemical toxicant	Activated	2.309	2.302	0.155	ATP1B2,BCL2,CCK,FGFR1,GADD45A,GK5,MAD1L1,MAPK14,PIK3R2,POSTN,PTPRS,UGDH
mir-21		microrna		1.834	1.857	0.157	BCL2,CCND1,DDAH1,EGR2,FAM3C,FCGR2A,FGF1,FGL2,FLT3LG,GATA3,GBP6,Gvin1 (includes others),Iigp1,IRAK1,LEPR,MMP2,PGAM1,PLAT,RAB7B,SLC16A10,SLPI,SOD2,TGFB1,TGM1,Tgtp1/Tgtp2,TP53,VCAM1
TRPV4	-0.397	ion channel		1.98	1.969	0.157	AQP5,COL2A1,TIMP1,VCAM1
Bvht	-0.257	other	Inhibited	-2.333	-2.353	0.163	ACTC1,ACVRL1,Hrc,MYOM1,PF4,SERPINF1,SMARCD3,SNAI1,UNC45B
NFKB2	0.079	transcription regulator	Inhibited	-2.206	-2.218	0.168	AR,BCL2,CCND1,KLK3,MMP2,SOD2,TNFAIP2,VCAM1
FAAH	-0.237	enzyme	Inhibited	-2	-1.993	0.175	HMOX1,RPL17,Rps3a1,RPS6
KLF15	0.24	transcription regulator	Inhibited	-2.421	-2.43	0.176	ACADVL,ACAT1,CCN2,CPT1B,FABP3,SLC2A4
IL33	0.811	cytokine		1.788	1.768	0.191	ACAT1,ADAMTS1,APP,ARG1,ARRB1,CCND1,CISH,EGR2,GATA3,HMOX1,LEPR,Marcks,MDK,PAPSS2,PLAT,RASGRP1,S100A8,SOD2,TGFB1,TIMP1,TNFAIP2,TPBG,TPSAB1/TPSB2
IL22		cytokine	Inhibited	-3.077	-3.087	0.198	BCL2,CALML3,CCND1,HMOX1,HSP90AB1,IL33,LCN2,PRDX5,PTGS1,S100A8,SERPINA3,SOD2
folic acid		chemical - endogenous mammalian		-1.915	-1.914	0.21	APP,BCL2,FZD1,MMP2,NOX4,TP53,VCAM1
fisetin		chemical toxicant		1.981	1.988	0.212	BAX,BCL2,CCND1,TP53
TCL1A		transcription regulator	Inhibited	-2	-2.01	0.228	Cd209b,CTSD,GUSB,HMOX1,LCN2,Ly6a (includes others),MAFB,S100A8,SLC40A1,TNFAIP2
CD40	-0.024	transmembrane receptor	Activated	2.077	2.064	0.23	ANPEP,BAX,BCL2,CALR,CCND1,CD44,CYSLTR1,DUSP6,FLT3LG,HSP90B1,Ly6a (includes others),MET,MMP14,PTGER2,TAPBP,TNFRSF11B,TP53,VCAM1
CDKN1B	0.046	kinase	Inhibited	-2.418	-2.4	0.236	BCL2,CA6,CCND1,DNASE1L2,ELOVL3,EPB41,FLT3LG,LEF1,MMP16,RUNX1,SLC9A1,TENM4
ATF6	-0.055	transcription regulator	Activated	2.2	2.188	0.237	APP,CALR,CEBPB,HSP90B1,NUCB2,PDIA4,PLAT
STAT5A	0.087	transcription regulator		-1.956	-1.959	0.238	AR,BAX,BCL2,CCND1,CEBPB,CISH,GADD45A,GADD45G,ID1,KLK3,KRT80,KSR1,LCN2,LEF1,MAF,MAL2,MYH1,PPFIBP2,RIN2,RUNX2,SBSPON,SERPINA3,TGFBR2,TLE4,TP53,TSPAN8
OTX2		transcription regulator	Activated	2.414	2.402	0.25	CPXM2,ENPP2,NCAM1,SLC16A8,STRA6,THBS4,TNC
CBFB	-0.045	transcription regulator	Activated	2.4	2.402	0.251	COCH,HTRA1,KLK3,RUNX1,RUNX2,SLC25A19,SPP1,TGFBR2,TPSAB1/TPSB2
ZEB1	0.111	transcription regulator	Inhibited	-2.137	-2.136	0.264	CD163,COL1A2,GATA3,MAL2,NRP2,RAB25,TP63
choline		chemical - endogenous mammalian	Inhibited	-2	-1.994	0.272	HMOX1,RBP4,SPP1,TP53
VEGFB	0.061	growth factor	Inhibited	-2.229	-2.227	0.277	BAX,PRDX5,SLC27A3,SOD2,TP53
docetaxel		chemical drug	Activated	2.697	2.703	0.287	AR,BAX,BCL2,CDH2,CTNND1,FGF2,KLK3,TP53,UGCG
CDKN1A	0.274	kinase		-1.898	-1.888	0.291	ACP1,APP,ASPN,BAX,BCL2,CCN2,CCND1,CD44,CTSK,GADD45A,GLB1,GRN,GSTO1,HJURP,LIMA1,MAF,MCM6,NPM1,PHGDH,SOD2,TGM1,TP53,TP63
5-azacytidine		chemical drug	Activated	2.016	2	0.297	ATP5F1A,CALR,CD44,GADD45A,HK2,HSP90B1,IRS2,Ly6a (includes others),MLH1,Mt1,SLC3A2,SLC9A1,TGFBR2,TGM2
FEV		transcription regulator	Activated	2.333	2.314	0.299	CITED1,EPHA7,GPR176,HTRA1,LPAR1,MCHR1,NFIA,SLIT2,VCAM1
PTGER4	0.104	g-protein coupled receptor		1.91	1.916	0.306	APP,AQP2,CD44,CITED2,CREB3L3,GBP6,HIVEP3,LHFPL2,MAFB,MMP2,RNF24,RUNX2,SPP1,Tgtp1/Tgtp2
EED	0.087	transcription regulator	Inhibited	-2.236	-2.221	0.313	BBOX1,GATA3,MMP2,RUNX2,WIF1
UCHL1	1.239	peptidase		1.761	1.762	0.322	ADCY9,HACD1,HOXD9,KLHL23/PHOSPHO2-KLHL23,RPS6,SOD2,TP53
mir-122		microrna	Activated	2.316	2.335	0.324	ALDOA,BCL2L2,CCNG1,CS,PTPN14,RCC2,SEMA4D,SERPINB6,TGM2
lenalidomide		chemical drug	Activated	2.161	2.156	0.347	ANTXR1,AUTS2,CCND1,CEBPB,CITED2,COX11,DEPP1,DLD,HIPK2,LEF1,LHFPL2,LIMA1,LRP1,MAN1C1,MAP2,MB,PPIF,SPSB1,TMEM64
PLIN5	-0.718	other		1.982	1.983	0.354	ACADVL,CPT1B,GCLC,HMOX1
QKI	-0.211	other		1.982	1.981	0.354	ID1,LAMP2,TNC,VCAM1
TAF7L		transcription regulator	Inhibited	-2	-2.013	0.367	AK1,AR,GCK,GPD2,SGK1
TET2	0.061	enzyme	Activated	2.309	2.299	0.405	FGL2,MMP27,P2RY2,PDGFRB,PPP1R13L,S100A8,SLC20A1,Spink2,TBX6,TGM1,TIMP1,Tpsab1
TAC1	2.621	other	Activated	2.2	2.187	0.455	BAX,HMOX1,MAFB,PLAT,TAC1,TGFB1,TNFRSF11B
phenobarbital		chemical drug	Inhibited	-2.449	-2.46	0.456	ABCB4,BCL2,CCND1,KCNK1,PAPSS2,TP53
NR5A1		ligand-dependent nuclear receptor		-1.96	-1.97	0.474	AMHR2,CYP26B1,FUT4,GAL,LEPR
NOTCH2	0.345	transcription regulator		1.886	1.88	0.477	ASCL1,BCL2,SDC2,TP53
IFN Beta		group	Activated	2.157	2.142	0.529	BCL2,CEBPB,DPP4,EEF1A1,Mt2,SNAPC1,TAPBP,TGFB1,TP53
ADRB		group	Inhibited	-2.137	-2.129	1	ARG1,ATF5,BAX,BNIP3,CCND1,DDIT4,DIO2,GADD45A,HMOX1,LTBP1,NOTCH2,SLC40A1
CD24		other	Inhibited	-2.438	-2.452	1	EDEM3,FXR1,LRPPRC,MBNL1,TP53,USO1,VDR
Interferon alpha		group		1.851	1.831	1	AUTS2,BCL2,Bst2,CCND1,CISH,CMTR1,COX7A1,CTH,DDIT4,DUSP6,EFCAB6,ENPP2,FBXO6,GATA3,GBP6,IGFBP4,Iigp1,JAK1,LIF,NPM1,PLAT,SHFL,TAPBP,TGFB1,TGM1,Tgtp1/Tgtp2,TRIM5,VCAM1
MAP3K14	-0.067	kinase		1.982	1.974	1	CD44,GADD45A,SIX2,VCAM1
miR-146a-5p (and other miRNAs w/seed GAGAACU)		mature microrna		-1.951	-1.938	1	CAT,COL13A1,IRAK1,MMP16
valproic acid		chemical drug	Activated	2.089	2.087	1	ALOX12,AR,BCL2,CALR,CAT,CCND1,CD44,CITED4,COCH,ELOVL3,HMOX1,LIMA1,LMO1,MAD1L1,Marcks,MBTPS1,MCM6,NARF,NCAM1,OSBPL5,PDGFRB,PLAT,PRKCZ,PRKD1,PTX3,SGK1,SLC1A2,SPP1,TENM3,TGFB1,TGM2,TSC22D3
