# Supplementary material for: Tendon and motor phenotypes in the Crtap-/- mouse model of recessive osteogenesis imperfecta
Source: eLife. 2021 May 26;10:e63488. doi: 10.7554/eLife.63488 (PMC8186905; doi:10.7554/eLife.63488)
Supplement: Figure 6—source data 3. — The Wald test was used to generate p-values and log2 fold changes. Genes with an adjusted p-value<0.05 and absolute log2 fold change >1 were called significantly differentially expressed genes. This is a full list of all differentially expressed genes ordered by adjusted p-value. [file elife-63488-fig6-data3.xlsx]

## Sheet: Table S3_eLife
Figure 6-source data 3. List of differentially expressed genes between 1-month wildtype and Crtap knockout patellar tendons.
The Wald test was used to generate p-values and log2 fold changes. Genes with an adjusted p-value < 0.05 and absolute log2 fold change > 1
were called significantly differentially expressed genes. Genes in this table are ordered by adjusted p-value.
ID	Gene	baseMean	log2FoldChange	lfcSE	stat	pvalue	padj
ENSMUSG00000063696	Gm8730	1313.57	6.00542	0.460204	13.0495	6.39808e-39	9.79482e-35
ENSMUSG00000032431	Crtap	2568.58	-9.18765	0.739488	-12.4243	1.92801e-35	1.4758e-31
ENSMUSG00000051920	Rspo2	612.126	4.64692	0.390053	11.9136	1.00564e-32	5.13179e-29
ENSMUSG00000031297	Slc7a3	367.335	5.17957	0.479066	10.8118	3.02694e-27	1.15848e-23
ENSMUSG00000013418	B4galnt2	280.857	6.26557	0.60394	10.3745	3.23953e-25	9.91879e-22
ENSMUSG00000026725	Tnn	934.453	8.04321	0.904445	8.89298	5.94912e-19	1.51792e-15
ENSMUSG00000027737	Slc7a11	642.651	2.80293	0.332375	8.43303	3.36827e-17	7.3664e-14
ENSMUSG00000036390	Gadd45a	800.65	2.87265	0.342686	8.38273	5.17132e-17	9.89597e-14
ENSMUSG00000097906	Gm9625	198.121	4.57064	0.561886	8.13447	4.13748e-16	7.03786e-13
ENSMUSG00000032715	Trib3	431.329	3.10011	0.382703	8.10056	5.47054e-16	8.37485e-13
ENSMUSG00000047963	Stbd1	280.526	3.37942	0.422178	8.00473	1.19729e-15	1.66631e-12
ENSMUSG00000097554	Gm26825	195.255	-6.43983	0.805816	-7.99169	1.33103e-15	1.69807e-12
ENSMUSG00000026193	Fn1	81132.8	2.8882	0.364595	7.92167	2.34346e-15	2.7597e-12
ENSMUSG00000021260	Hhipl1	120.382	4.16577	0.537147	7.75536	8.80964e-15	9.1576e-12
ENSMUSG00000100801	Gm15459	94.6376	-5.24442	0.676436	-7.75303	8.97276e-15	9.1576e-12
ENSMUSG00000052276	Ostn	171.464	4.88717	0.657972	7.42762	1.10567e-13	1.05792e-10
ENSMUSG00000059058	Tma7-ps	88.2241	-5.29281	0.73011	-7.24933	4.18834e-13	3.77172e-10
ENSMUSG00000026456	Cyb5r1	1246.31	2.18372	0.308085	7.08805	1.36014e-12	1.1568e-09
ENSMUSG00000026994	Galnt3	119.937	3.97478	0.563672	7.05158	1.76896e-12	1.42532e-09
ENSMUSG00000094344	Gm11942	138.507	-5.4426	0.778077	-6.99495	2.65361e-12	2.0312e-09
ENSMUSG00000079022	Col22a1	936.117	3.08485	0.44779	6.88906	5.61628e-12	4.09427e-09
ENSMUSG00000066258	Trim12a	123.663	-8.13096	1.19892	-6.78188	1.18622e-11	8.25448e-09
ENSMUSG00000037362	Nov	5391.16	3.55682	0.53246	6.67997	2.3899e-11	1.59074e-08
ENSMUSG00000030827	Fgf21	105.625	4.22527	0.642444	6.57687	4.80451e-11	3.06467e-08
ENSMUSG00000026147	Col9a1	278.05	4.92436	0.762914	6.45467	1.08453e-10	6.64125e-08
ENSMUSG00000031253	Srpx2	1653.41	2.35745	0.368595	6.39576	1.59749e-10	9.40612e-08
ENSMUSG00000027570	Col9a3	468.227	4.2206	0.665433	6.34264	2.25857e-10	1.28061e-07
ENSMUSG00000027004	Frzb	1932.31	4.94971	0.782239	6.32761	2.48981e-10	1.3613e-07
ENSMUSG00000036446	Lum	5194	2.4201	0.38781	6.24043	4.36364e-10	2.30355e-07
ENSMUSG00000038508	Gdf15	84.2922	3.65407	0.58935	6.20017	5.64025e-10	2.87822e-07
ENSMUSG00000034488	Edil3	308.886	2.6611	0.435824	6.10591	1.02219e-09	5.04795e-07
ENSMUSG00000074934	Grem1	944.741	6.10126	1.00919	6.04568	1.48781e-09	7.11779e-07
ENSMUSG00000054136	Adm2	55.4429	5.03015	0.839211	5.9939	2.04865e-09	9.50389e-07
ENSMUSG00000098202	B830012L14Rik	110.971	-2.76904	0.463471	-5.97458	2.3068e-09	1.03867e-06
ENSMUSG00000055775	Myh8	69.7967	5.2616	0.884441	5.94907	2.6967e-09	1.17954e-06
ENSMUSG00000022780	Meltf	89.9927	4.9073	0.838717	5.85096	4.88732e-09	2.02216e-06
ENSMUSG00000087149	Itih5l-ps	185.853	4.68353	0.8001	5.85368	4.80804e-09	2.02216e-06
ENSMUSG00000067377	Tspan6	686.668	2.0955	0.360126	5.81879	5.92754e-09	2.32679e-06
ENSMUSG00000094497	Gm8210	99.8744	-8.81803	1.51518	-5.81979	5.89222e-09	2.32679e-06
ENSMUSG00000053846	Lipg	107.92	3.40845	0.589926	5.77776	7.57016e-09	2.89729e-06
ENSMUSG00000028860	Sytl1	66.5408	-3.45472	0.601032	-5.74797	9.03189e-09	3.37242e-06
ENSMUSG00000026100	Mstn	168.813	3.35508	0.594105	5.64728	1.63009e-08	5.94168e-06
ENSMUSG00000045871	Slitrk6	210.429	2.17863	0.39145	5.56554	2.6134e-08	9.3043e-06
ENSMUSG00000015652	Steap1	58.7303	4.5609	0.830939	5.48885	4.04558e-08	1.40758e-05
ENSMUSG00000072476	Gm9008	50.6371	-9.26981	1.70284	-5.44373	5.21756e-08	1.77501e-05
ENSMUSG00000037411	Serpine1	2047.9	2.37039	0.436139	5.43496	5.48101e-08	1.8241e-05
ENSMUSG00000097767	Miat	696.628	-2.4458	0.452427	-5.40595	6.44675e-08	2.09986e-05
ENSMUSG00000008461	Fut1	40.6243	4.67939	0.870955	5.37272	7.75599e-08	2.45072e-05
ENSMUSG00000027204	Fbn1	15280.6	1.71201	0.31877	5.37068	7.84409e-08	2.45072e-05
ENSMUSG00000040164	Kcns1	43.5194	4.1029	0.765879	5.35711	8.45635e-08	2.58917e-05
ENSMUSG00000030711	Sult1a1	737.254	-2.35565	0.440506	-5.34759	8.91323e-08	2.67554e-05
ENSMUSG00000053141	Ptprt	743.415	2.28478	0.428967	5.32623	1.00273e-07	2.95207e-05
ENSMUSG00000047759	Hs3st3a1	154.401	2.97385	0.559049	5.31949	1.04059e-07	3.00573e-05
ENSMUSG00000028214	Gem	489.025	1.71137	0.322167	5.31206	1.08393e-07	3.07295e-05
ENSMUSG00000032374	Plod2	4056.31	2.87934	0.543062	5.30204	1.14514e-07	3.18744e-05
ENSMUSG00000071001	Hrct1	195.031	-2.18214	0.41264	-5.28825	1.2349e-07	3.37591e-05
ENSMUSG00000026249	Serpine2	3855.4	1.74729	0.332151	5.26052	1.43649e-07	3.85811e-05
ENSMUSG00000028972	Car6	43.0945	6.49635	1.24576	5.21479	1.84028e-07	4.8574e-05
ENSMUSG00000058152	Chsy3	607.523	2.44326	0.469671	5.20206	1.97087e-07	5.1139e-05
ENSMUSG00000067235	H2-Q10	130.928	-3.50885	0.675819	-5.192	2.0805e-07	5.30841e-05
ENSMUSG00000021614	Vcan	3353.25	2.08909	0.404456	5.16518	2.40208e-07	6.02843e-05
ENSMUSG00000012705	Retn	560.525	-3.43203	0.668146	-5.13664	2.79689e-07	6.90607e-05
ENSMUSG00000033316	Galnt9	64.5443	2.81365	0.549496	5.12042	3.04852e-07	7.40789e-05
ENSMUSG00000057123	Gja5	120.509	-2.1541	0.421999	-5.1045	3.31666e-07	7.93356e-05
ENSMUSG00000104292	Gm38042	138.638	-2.09119	0.410464	-5.09469	3.49314e-07	8.22716e-05
ENSMUSG00000038156	Spon1	755.116	-1.77355	0.348448	-5.08985	3.58351e-07	8.31212e-05
ENSMUSG00000028542	Slc6a9	530.078	1.60281	0.316623	5.0622	4.14439e-07	9.46963e-05
ENSMUSG00000064340	mt-Tl1	338.361	-1.74057	0.345589	-5.03654	4.74024e-07	0.000106718
ENSMUSG00000051048	P4ha3	576.974	3.17363	0.636365	4.98712	6.12869e-07	0.000135977
ENSMUSG00000031734	Irx3	111.562	2.28816	0.459376	4.98101	6.3252e-07	0.000138332
ENSMUSG00000081434	Gm14165	60.5425	3.44918	0.696269	4.95381	7.27749e-07	0.000156917
ENSMUSG00000035686	Thrsp	1354.43	-3.6004	0.729716	-4.93398	8.05716e-07	0.000168969
ENSMUSG00000039956	Mrap	357.835	-3.84813	0.779762	-4.93501	8.01479e-07	0.000168969
ENSMUSG00000086596	Susd5	598.072	3.17963	0.646076	4.92144	8.59085e-07	0.000177726
ENSMUSG00000048376	F2r	827.744	2.25223	0.458361	4.91366	8.93915e-07	0.000182466
ENSMUSG00000030074	Gxylt2	437.121	1.64474	0.336068	4.89406	9.87785e-07	0.000195131
ENSMUSG00000037868	Egr2	105.003	2.38146	0.486518	4.89491	9.83516e-07	0.000195131
ENSMUSG00000041653	Pnpla3	1018.77	-4.68703	0.957948	-4.89278	9.94198e-07	0.000195131
ENSMUSG00000023828	Slc22a3	251.08	-3.9718	0.812737	-4.88694	1.02415e-06	0.000198464
ENSMUSG00000029752	Asns	1194.36	1.79604	0.36853	4.87354	1.09618e-06	0.000209768
ENSMUSG00000107624	Gm44005	103.676	-2.44737	0.502453	-4.87085	1.11118e-06	0.000210013
ENSMUSG00000085151	1110018N20Rik	67.4844	-2.52685	0.521414	-4.84615	1.25881e-06	0.000235013
ENSMUSG00000048616	Nog	137.498	2.8869	0.596458	4.84007	1.29794e-06	0.000239399
ENSMUSG00000047907	Tshz2	578.247	-1.63366	0.337791	-4.83631	1.32269e-06	0.000241059
ENSMUSG00000038742	Angptl6	107.787	2.44937	0.513609	4.76894	1.85196e-06	0.000333164
ENSMUSG00000049336	Tenm2	121.763	2.98304	0.625793	4.76682	1.87158e-06	0.000333164
ENSMUSG00000023067	Cdkn1a	987.767	1.71282	0.362885	4.72002	2.35822e-06	0.000414965
ENSMUSG00000055561	Spink5	22.8151	7.78386	1.66352	4.67916	2.88047e-06	0.000500292
ENSMUSG00000059201	Lep	1488.01	-4.78153	1.02231	-4.67718	2.90849e-06	0.000500292
ENSMUSG00000026837	Col5a1	25754.5	1.74185	0.373939	4.65812	3.19112e-06	0.000542809
ENSMUSG00000060441	Trim5	28.9901	-8.49554	1.82609	-4.65231	3.28231e-06	0.000552185
ENSMUSG00000031722	Hp	12837.7	-4.76698	1.02671	-4.64298	3.43422e-06	0.000571461
ENSMUSG00000064345	mt-Nd2	52004.5	-1.46934	0.317131	-4.63324	3.59991e-06	0.000592591
ENSMUSG00000026841	Fibcd1	35.402	3.61431	0.781697	4.62368	3.76996e-06	0.000613982
ENSMUSG00000022952	Runx1	539.461	1.81464	0.394063	4.60496	4.12541e-06	0.000657874
ENSMUSG00000067818	Myl9	1782.77	-1.35024	0.293169	-4.60568	4.11115e-06	0.000657874
ENSMUSG00000029377	Ereg	55.3922	3.7217	0.809146	4.59954	4.23424e-06	0.000668268
ENSMUSG00000017002	Slpi	168.437	2.97808	0.647983	4.59592	4.30845e-06	0.000673041
ENSMUSG00000018648	Dusp14	382.025	2.5665	0.560677	4.5775	4.70556e-06	0.000727651
ENSMUSG00000043088	Il17re	48.3842	-3.38052	0.7414	-4.55964	5.12418e-06	0.000784461
ENSMUSG00000020415	Pttg1	121.668	-2.57017	0.564511	-4.55292	5.29057e-06	0.000801914
ENSMUSG00000024598	Fbn2	976.887	2.93732	0.645883	4.54776	5.4221e-06	0.000813794
ENSMUSG00000054013	Tmem179	163.884	-3.85555	0.850876	-4.53127	5.86293e-06	0.000871413
ENSMUSG00000039196	Orm1	228.709	-3.52272	0.778911	-4.52263	6.10771e-06	0.000899066
ENSMUSG00000043289	Mei4	29.3284	6.69728	1.48728	4.50303	6.69906e-06	0.000976722
ENSMUSG00000007617	Homer1	273.289	1.69302	0.376615	4.49536	6.94526e-06	0.00100307
ENSMUSG00000068617	Efcab1	28.1054	3.91215	0.871877	4.48705	7.22169e-06	0.00102367
ENSMUSG00000107603	Gm43921	316.029	-2.11704	0.471618	-4.48889	7.15945e-06	0.00102367
ENSMUSG00000073409	H2-Q6	108.581	-2.6762	0.597999	-4.47525	7.63209e-06	0.00107192
ENSMUSG00000033022	Cdo1	1366.64	-3.9642	0.889865	-4.45483	8.39583e-06	0.00116847
ENSMUSG00000026042	Col5a2	28288	1.63242	0.367063	4.44726	8.69724e-06	0.0011888
ENSMUSG00000038418	Egr1	1299.67	1.55066	0.348561	4.44875	8.63715e-06	0.0011888
ENSMUSG00000092837	Rpph1	97.4656	-4.31708	0.976711	-4.42001	9.86949e-06	0.0013371
ENSMUSG00000007888	Crlf1	417.976	2.53631	0.574149	4.41751	9.98428e-06	0.00134078
ENSMUSG00000042451	Mybph	340.447	3.42985	0.7792	4.40176	1.07377e-05	0.00142942
ENSMUSG00000021720	Rnf180	148.13	2.46567	0.560944	4.39556	1.10486e-05	0.00143341
ENSMUSG00000031026	Trim66	76.8857	2.9481	0.670485	4.39696	1.09776e-05	0.00143341
ENSMUSG00000097441	Gm26633	60.2283	4.28747	0.974666	4.39891	1.08796e-05	0.00143341
ENSMUSG00000025479	Cyp2e1	595.917	-4.24474	0.966498	-4.39188	1.12377e-05	0.00144569
ENSMUSG00000040010	Slc7a5	2544.64	2.42538	0.553129	4.38483	1.16077e-05	0.00148085
ENSMUSG00000032246	Calml4	112.535	-3.18406	0.727075	-4.37927	1.19076e-05	0.00150656
ENSMUSG00000064341	mt-Nd1	94309.9	-1.41605	0.323604	-4.37586	1.20954e-05	0.00151777
ENSMUSG00000028195	Cyr61	3991.5	1.96496	0.450263	4.36402	1.27694e-05	0.00158682
ENSMUSG00000031740	Mmp2	9074.4	1.67975	0.385035	4.36259	1.2853e-05	0.00158682
ENSMUSG00000028838	Extl1	119.054	3.56974	0.820381	4.35133	1.35317e-05	0.00165156
ENSMUSG00000064363	mt-Nd4	55254.1	-1.39093	0.319729	-4.35033	1.35931e-05	0.00165156
ENSMUSG00000049001	Ndnf	207.826	1.59188	0.367326	4.33371	1.4662e-05	0.00176741
ENSMUSG00000044317	Gpr4	292.765	-1.68662	0.390592	-4.31811	1.57374e-05	0.00188222
ENSMUSG00000064368	mt-Nd6	22646.9	-1.41937	0.329213	-4.31141	1.62217e-05	0.0019251
ENSMUSG00000065037	Rn7sk	480.11	-2.30599	0.53617	-4.30085	1.70143e-05	0.00198834
ENSMUSG00000110613	Lncbate1	44.7297	-5.05493	1.17503	-4.30197	1.69285e-05	0.00198834
ENSMUSG00000037071	Scd1	25780	-2.39545	0.558933	-4.28575	1.82121e-05	0.00209631
ENSMUSG00000098973	Mir6236	33999.3	-4.05939	0.947033	-4.28643	1.81571e-05	0.00209631
ENSMUSG00000095041	AC149090.1	1578.82	-1.71211	0.399714	-4.28333	1.84116e-05	0.00210345
ENSMUSG00000021728	Emb	729.398	1.80172	0.421365	4.27592	1.90353e-05	0.00215786
ENSMUSG00000064369	mt-Te	710.205	-1.50179	0.35135	-4.27435	1.91697e-05	0.00215786
ENSMUSG00000030278	Cidec	3653.66	-3.95179	0.926727	-4.26424	2.00582e-05	0.0022414
ENSMUSG00000030088	Aldh1l1	463.18	-3.58702	0.84195	-4.26037	2.04091e-05	0.00226408
ENSMUSG00000083833	Gm13841	23.3571	-5.115	1.20191	-4.25571	2.08382e-05	0.00229505
ENSMUSG00000040441	Slc26a10	112.709	-2.4059	0.566596	-4.24623	2.17395e-05	0.00236035
ENSMUSG00000061780	Cfd	27405.4	-3.78621	0.891603	-4.24652	2.17119e-05	0.00236035
ENSMUSG00000088609	Gm24187	1984.86	-4.0514	0.955821	-4.23866	2.2486e-05	0.00242421
ENSMUSG00000049892	Rasd1	452.798	-3.4179	0.808092	-4.22959	2.34123e-05	0.00249979
ENSMUSG00000064370	mt-Cytb	144981	-1.36932	0.323822	-4.22861	2.35136e-05	0.00249979
ENSMUSG00000097391	Mirg	819.284	-1.31324	0.310814	-4.22517	2.38762e-05	0.0025052
ENSMUSG00000106706	C530043K16Rik	38.6169	-2.86738	0.678665	-4.22502	2.38918e-05	0.0025052
ENSMUSG00000101939	Gm28438	455.822	-1.48133	0.350922	-4.22126	2.42942e-05	0.00253007
ENSMUSG00000078921	Tgtp2	45.9117	-2.63609	0.624796	-4.21913	2.45251e-05	0.00253686
ENSMUSG00000026220	Slc16a14	64.4842	4.07625	0.966993	4.21538	2.49355e-05	0.002562
ENSMUSG00000109257	Gm45200	29.3441	-3.45161	0.819354	-4.2126	2.52443e-05	0.00257643
ENSMUSG00000018830	Myh11	1501.58	-1.64997	0.39235	-4.20536	2.6067e-05	0.00264278
ENSMUSG00000042195	Slc35f2	23.0505	4.18301	0.996181	4.19905	2.68037e-05	0.00269959
ENSMUSG00000022892	App	16191.9	1.18084	0.282925	4.1737	2.99693e-05	0.00299485
ENSMUSG00000026628	Atf3	229.273	2.03331	0.487311	4.17251	3.01265e-05	0.00299485
ENSMUSG00000021268	Meg3	30593	-1.48414	0.356678	-4.16101	3.16847e-05	0.00312942
ENSMUSG00000022878	Adipoq	5496.32	-3.90814	0.942708	-4.14566	3.38842e-05	0.00332521
ENSMUSG00000024210	Ip6k3	70.2101	2.23919	0.542557	4.12712	3.67341e-05	0.00358193
ENSMUSG00000028019	Pdgfc	505.107	1.46597	0.355923	4.11878	3.80878e-05	0.00361039
ENSMUSG00000030657	Xylt1	698.891	1.76118	0.427818	4.11666	3.8441e-05	0.00361039
ENSMUSG00000044405	Adig	235.202	-3.416	0.828977	-4.12074	3.77655e-05	0.00361039
ENSMUSG00000046318	Ccbe1	146.648	1.91366	0.464748	4.11763	3.82783e-05	0.00361039
ENSMUSG00000048065	Cyb5r2	275.926	1.68999	0.410239	4.11953	3.79648e-05	0.00361039
ENSMUSG00000086324	Gm15564	2522.27	-4.17917	1.01401	-4.12142	3.76548e-05	0.00361039
ENSMUSG00000037095	Lrg1	1784.82	-3.35642	0.815971	-4.11341	3.89862e-05	0.00363926
ENSMUSG00000000031	H19	3471.67	1.39958	0.342018	4.09211	4.27465e-05	0.0039661
ENSMUSG00000050549	Fam241a	157.839	-2.02327	0.49562	-4.08231	4.45904e-05	0.00408619
ENSMUSG00000063727	Tnfrsf11b	313.855	3.09275	0.757699	4.08177	4.46947e-05	0.00408619
ENSMUSG00000075296	Aldh3b2	100.434	-3.72883	0.913705	-4.081	4.48416e-05	0.00408619
ENSMUSG00000040564	Apoc1	122.544	-3.61643	0.886861	-4.07778	4.54669e-05	0.00411865
ENSMUSG00000110344	Gm45716	107.204	-3.52481	0.867258	-4.06432	4.81728e-05	0.0043381
ENSMUSG00000001029	Icam2	182.942	-1.783	0.438918	-4.06227	4.85988e-05	0.00435056
ENSMUSG00000040945	Rcc2	1926.49	1.30056	0.320263	4.06092	4.88795e-05	0.00435056
ENSMUSG00000086432	B430119L08Rik	20.6065	-8.00521	1.9728	-4.0578	4.95373e-05	0.00438362
ENSMUSG00000022261	Sdc2	2447.62	1.18952	0.294299	4.04187	5.30277e-05	0.00466553
ENSMUSG00000051314	Ffar2	335.559	-4.16239	1.03181	-4.03406	5.48215e-05	0.00479578
ENSMUSG00000008874	Clec3a	9023.72	2.91179	0.723286	4.02578	5.67872e-05	0.00493591
ENSMUSG00000025153	Fasn	7431.08	-1.9257	0.47848	-4.02462	5.70681e-05	0.00493591
ENSMUSG00000028328	Tmod1	198.342	2.29986	0.571965	4.02097	5.79581e-05	0.00498472
ENSMUSG00000097971	Gm26917	14665	-2.99346	0.744798	-4.01916	5.84062e-05	0.0049952
ENSMUSG00000052684	Jun	2253.15	1.44682	0.360279	4.01583	5.9238e-05	0.00503819
ENSMUSG00000024972	Lgals12	850.306	-3.83325	0.955146	-4.01326	5.98863e-05	0.00506519
ENSMUSG00000020000	Moxd1	415.68	1.99631	0.498978	4.0008	6.31294e-05	0.00531016
ENSMUSG00000026459	Myog	22.0939	4.26263	1.0675	3.99309	6.52166e-05	0.00545574
ENSMUSG00000025161	Slc16a3	834.603	1.64446	0.41225	3.98898	6.63566e-05	0.00552094
ENSMUSG00000020105	Lrig3	809.429	1.64619	0.413237	3.98364	6.78665e-05	0.005544
ENSMUSG00000021613	Hapln1	944.396	2.68905	0.675095	3.98321	6.79894e-05	0.005544
ENSMUSG00000079017	Ifi27l2a	1653.15	-3.30665	0.829983	-3.98399	6.77665e-05	0.005544
ENSMUSG00000089665	Fcor	115.236	-4.00113	1.00458	-3.98289	6.80823e-05	0.005544
ENSMUSG00000009281	Rarres2	1883.57	-1.8227	0.459257	-3.9688	7.2237e-05	0.00570569
ENSMUSG00000027895	Kcnc4	195.404	3.02839	0.763094	3.96857	7.23042e-05	0.00570569
ENSMUSG00000030546	Plin1	5499.04	-3.85688	0.970665	-3.97343	7.08436e-05	0.00570569
ENSMUSG00000040181	Fmo1	842.148	-2.37409	0.59772	-3.97192	7.12967e-05	0.00570569
ENSMUSG00000043122	A530016L24Rik	411.036	-3.86451	0.973587	-3.96935	7.20701e-05	0.00570569
ENSMUSG00000044770	Scml4	63.1349	2.78221	0.700631	3.971	7.15712e-05	0.00570569
ENSMUSG00000020140	Lgr5	40.9099	3.24045	0.819322	3.95503	7.65236e-05	0.00597144
ENSMUSG00000022468	Endou	59.7545	-3.18666	0.8056	-3.95563	7.63319e-05	0.00597144
ENSMUSG00000025792	Slc25a10	1199.53	-2.78322	0.704442	-3.95096	7.78383e-05	0.00597144
ENSMUSG00000028444	Cntfr	364.289	-2.60517	0.659864	-3.94804	7.87923e-05	0.00597144
ENSMUSG00000039126	Prune2	591.724	1.33594	0.338315	3.94881	7.85416e-05	0.00597144
ENSMUSG00000042254	Cilp	5501.74	2.46764	0.624339	3.95241	7.73673e-05	0.00597144
ENSMUSG00000047591	Mafa	52.7752	3.6879	0.933497	3.95063	7.79453e-05	0.00597144
ENSMUSG00000097263	Gm26804	59.8248	-2.07851	0.526222	-3.94986	7.81955e-05	0.00597144
ENSMUSG00000035202	Lars2	120580	-3.76554	0.954225	-3.94618	7.94091e-05	0.00598854
ENSMUSG00000028967	Errfi1	755.637	1.22276	0.310309	3.94046	8.13271e-05	0.00610312
ENSMUSG00000050234	Gja4	347.218	-1.70559	0.43329	-3.93636	8.27268e-05	0.00617788
ENSMUSG00000026986	Hnmt	86.5655	-1.83532	0.46645	-3.93466	8.33155e-05	0.00619163
ENSMUSG00000022860	Chodl	97.0138	2.50281	0.636506	3.9321	8.4207e-05	0.00619925
ENSMUSG00000040618	Pck2	2634.3	1.45042	0.368873	3.93204	8.42279e-05	0.00619925
ENSMUSG00000040016	Ptger3	454.593	-3.4509	0.878322	-3.92897	8.53103e-05	0.00624888
ENSMUSG00000031659	Adcy7	3368.9	1.73075	0.441585	3.9194	8.87697e-05	0.00644064
ENSMUSG00000085925	Rtl1	267.736	-1.70622	0.435215	-3.9204	8.84035e-05	0.00644064
ENSMUSG00000046070	Igfals	165.858	-3.80558	0.971822	-3.91592	9.00585e-05	0.00650333
ENSMUSG00000035184	Fam124a	850.795	-1.18928	0.303823	-3.91438	9.06356e-05	0.00651428
ENSMUSG00000029304	Spp1	1923.95	1.90943	0.488186	3.91127	9.18118e-05	0.00656798
ENSMUSG00000028339	Col15a1	23743.5	1.50527	0.38518	3.90796	9.30775e-05	0.00662755
ENSMUSG00000046186	Cd109	3124.97	2.24892	0.575837	3.90548	9.40397e-05	0.00666507
ENSMUSG00000045838	A430105I19Rik	244.586	-1.39711	0.359166	-3.88987	0.000100297	0.00697928
ENSMUSG00000076258	Gm23935	170966	-3.74039	0.961351	-3.89076	9.99305e-05	0.00697928
ENSMUSG00000076281	Gm24270	15905.6	-3.64753	0.936974	-3.89288	9.90598e-05	0.00697928
ENSMUSG00000093812	Gm5627	39.0103	-5.43958	1.39787	-3.89134	9.96939e-05	0.00697928
ENSMUSG00000097617	Gm10687	78.3584	-3.392	0.874452	-3.879	0.000104885	0.00726556
ENSMUSG00000063455	D630045J12Rik	369.894	1.76936	0.456351	3.8772	0.000105668	0.00728678
ENSMUSG00000063903	Klk1	216.437	-3.81056	0.986778	-3.86162	0.000112639	0.0077327
ENSMUSG00000081189	Hspd1-ps4	30.3454	-4.23934	1.09985	-3.85448	0.000115974	0.00792607
ENSMUSG00000024534	Sncaip	390.172	-1.57245	0.408488	-3.84945	0.000118381	0.00801901
ENSMUSG00000090386	Mir99ahg	1074.23	-1.20539	0.313053	-3.85045	0.000117902	0.00801901
ENSMUSG00000040616	Tmem51	58.5078	-2.07714	0.539822	-3.84783	0.000119167	0.0080367
ENSMUSG00000101609	Kcnq1ot1	1039.62	-1.20439	0.313098	-3.84668	0.00011973	0.00803921
ENSMUSG00000070643	Sox13	303.868	-1.63971	0.426444	-3.84509	0.000120511	0.00805632
ENSMUSG00000037035	Inhbb	473.208	-2.16882	0.564661	-3.84092	0.000122575	0.00812751
ENSMUSG00000057596	Trim30d	33.3894	-6.22658	1.62117	-3.84079	0.000122637	0.00812751
ENSMUSG00000024747	Aldh1a7	161.326	-2.92812	0.763439	-3.83544	0.000125341	0.00823537
ENSMUSG00000038172	Ttc39b	632.999	1.21361	0.316404	3.83563	0.00012524	0.00823537
ENSMUSG00000034127	Tspan8	59.4749	3.03857	0.792835	3.83254	0.000126828	0.00829747
ENSMUSG00000041737	Tmem45b	730.974	-3.48539	0.910762	-3.8269	0.000129768	0.00845368
ENSMUSG00000002980	Bcam	1316.98	-1.87997	0.491516	-3.82484	0.000130855	0.00848841
ENSMUSG00000019997	Ctgf	10951.4	2.33704	0.611311	3.82299	0.000131842	0.0085163
ENSMUSG00000032036	Kirrel3	68.958	2.11289	0.553415	3.81791	0.000134586	0.00865706
ENSMUSG00000047419	Cmya5	1403.68	2.47962	0.650614	3.8112	0.000138292	0.00885819
ENSMUSG00000020264	Slc36a2	591.17	-3.37351	0.887444	-3.80138	0.000143894	0.00908337
ENSMUSG00000024479	Mal2	104.676	2.3355	0.614276	3.80204	0.000143508	0.00908337
ENSMUSG00000026442	Nfasc	1175.94	2.36421	0.622472	3.7981	0.000145808	0.00908337
ENSMUSG00000030562	Nox4	338.129	1.95786	0.51502	3.80152	0.000143814	0.00908337
ENSMUSG00000044086	Lmod3	104.557	2.84189	0.748376	3.79741	0.000146216	0.00908337
ENSMUSG00000068699	Flnc	1173.91	1.61109	0.424075	3.79906	0.000145243	0.00908337
ENSMUSG00000083563	Gm13340	68.0676	-1.87854	0.494617	-3.79797	0.000145888	0.00908337
ENSMUSG00000097789	Gm2115	235.149	1.77142	0.466551	3.79684	0.000146554	0.00908337
ENSMUSG00000025911	Adhfe1	328.808	-3.3957	0.895993	-3.78987	0.000150724	0.00926682
ENSMUSG00000079363	Gbp4	253.985	-1.8898	0.498551	-3.79059	0.000150289	0.00926682
ENSMUSG00000001349	Cnn1	56.2363	-2.99477	0.791288	-3.78467	0.00015391	0.00937203
ENSMUSG00000003528	Slc25a1	1331.24	-1.5953	0.42169	-3.7831	0.000154884	0.00937203
ENSMUSG00000060550	H2-Q7	140.779	-1.97368	0.52142	-3.7852	0.000153588	0.00937203
ENSMUSG00000078234	Klhdc7a	630.869	-3.5629	0.941706	-3.78346	0.000154665	0.00937203
ENSMUSG00000033576	Apol6	613.51	-3.07508	0.81346	-3.78025	0.000156672	0.00944291
ENSMUSG00000001663	Gstt1	233.579	-1.82735	0.484089	-3.77482	0.000160121	0.00961292
ENSMUSG00000037855	Zfp365	314.823	2.29517	0.609869	3.76339	0.000167625	0.0100241
ENSMUSG00000022546	Gpt	435.874	-3.16534	0.841531	-3.76141	0.000168958	0.0100645
ENSMUSG00000016496	Cd274	68.2431	-2.84968	0.757842	-3.76025	0.000169743	0.0100721
ENSMUSG00000032355	Mlip	81.1271	2.68354	0.714772	3.7544	0.000173759	0.0102706
ENSMUSG00000021699	Pde4d	610.595	1.42849	0.380599	3.75327	0.00017454	0.010277
ENSMUSG00000022883	Robo1	575.065	1.75936	0.468931	3.75186	0.00017553	0.0102957
ENSMUSG00000044211	Gm7887	30.2408	-2.73803	0.730115	-3.75014	0.000176737	0.0103269
ENSMUSG00000075014	Gm10800	56.9089	-4.10961	1.09631	-3.74858	0.000177836	0.0103517
ENSMUSG00000029156	Sgcb	1224.51	1.13509	0.302983	3.74639	0.0001794	0.0104032
ENSMUSG00000000440	Pparg	575.168	-3.22544	0.864699	-3.73013	0.000191379	0.0107764
ENSMUSG00000017400	Stac2	53.007	2.18898	0.586324	3.73339	0.000188917	0.0107764
ENSMUSG00000028776	Tinagl1	2010.6	-2.1068	0.564823	-3.73002	0.000191468	0.0107764
ENSMUSG00000039747	Orai2	117.295	1.81631	0.486277	3.73513	0.000187621	0.0107764
ENSMUSG00000062515	Fabp4	21013.4	-2.94639	0.789122	-3.73375	0.00018865	0.0107764
ENSMUSG00000066361	Serpina3c	456.316	-3.46231	0.927875	-3.73144	0.000190388	0.0107764
ENSMUSG00000092341	Malat1	56253.4	-1.36918	0.366975	-3.731	0.000190725	0.0107764
ENSMUSG00000107091	Gm43343	40.4327	-2.35724	0.631127	-3.73498	0.000187733	0.0107764
ENSMUSG00000033174	Mgll	6161.9	-1.53868	0.413047	-3.72519	0.000195166	0.0109443
ENSMUSG00000031610	Scrg1	567.255	2.55931	0.68721	3.72421	0.000195929	0.010947
ENSMUSG00000059422	Gm8116	22.5711	-3.19308	0.859044	-3.71701	0.000201595	0.0112226
ENSMUSG00000101940	Akp-ps1	30.5348	-4.20369	1.1313	-3.71581	0.000202551	0.011235
ENSMUSG00000003123	Lipe	4359.73	-3.3824	0.911802	-3.70958	0.000207605	0.0113104
ENSMUSG00000023036	Pcdhgc4	85.3989	-1.77446	0.477999	-3.71227	0.000205406	0.0113104
ENSMUSG00000027221	Chst1	575.084	-2.85595	0.769746	-3.71025	0.000207052	0.0113104
ENSMUSG00000027762	Sucnr1	32.757	-4.15583	1.12018	-3.70996	0.000207292	0.0113104
ENSMUSG00000099119	Mir6546	19.6257	-3.33588	0.898608	-3.71227	0.000205409	0.0113104
ENSMUSG00000068122	Agtr2	84.1201	1.85595	0.500716	3.7066	0.000210058	0.0114035
ENSMUSG00000025509	Pnpla2	5458.73	-2.97263	0.803268	-3.70067	0.000215033	0.0115913
ENSMUSG00000070498	Tmem132b	20.9997	3.65821	0.988414	3.70109	0.000214673	0.0115913
ENSMUSG00000018169	Mfng	516.628	-2.92284	0.790556	-3.69719	0.000217997	0.0116689
ENSMUSG00000064325	Hhip	101.886	2.43996	0.6598	3.69803	0.000217278	0.0116689
ENSMUSG00000042680	Garem1	292.18	1.75107	0.474159	3.69301	0.000221618	0.0118214
ENSMUSG00000031489	Adrb3	232.903	-3.34526	0.906882	-3.68875	0.000225355	0.011979
ENSMUSG00000020599	Rgs9	471.234	-3.73267	1.01258	-3.68628	0.000227557	0.0120542
ENSMUSG00000030222	Rerg	251.813	2.19627	0.596465	3.68215	0.000231279	0.0122092
ENSMUSG00000098178	Gm42418	797272	-3.25005	0.882992	-3.68072	0.000232574	0.0122353
ENSMUSG00000024486	Hbegf	1198.14	1.92239	0.522418	3.6798	0.000233419	0.0122377
ENSMUSG00000036395	Glb1l2	1120.63	-4.09527	1.11392	-3.67644	0.000236512	0.0123576
ENSMUSG00000022840	Adcy5	775.53	-3.04407	0.829542	-3.66958	0.000242954	0.0126148
ENSMUSG00000037406	Htra4	521.878	2.382	0.649146	3.66944	0.000243084	0.0126148
ENSMUSG00000031519	Asb5	60.7561	2.94969	0.804224	3.66774	0.0002447	0.0126558
ENSMUSG00000106753	Gm43230	22.0756	-3.15241	0.861108	-3.66088	0.000251351	0.012956
ENSMUSG00000087382	Ctcflos	146.12	-3.40319	0.930574	-3.65708	0.000255102	0.0131052
ENSMUSG00000111361	Gm47445	92.8448	-1.94664	0.532483	-3.65579	0.000256395	0.0131276
ENSMUSG00000034785	Dio1	44.2849	-4.24147	1.16251	-3.64854	0.000263738	0.0134585
ENSMUSG00000025491	Ifitm1	68.2163	-2.0073	0.550627	-3.64549	0.000266883	0.0135738
ENSMUSG00000027605	Acss2	304.93	-1.41117	0.387242	-3.64417	0.000268255	0.0135984
ENSMUSG00000025427	Rnf165	160.61	-1.7013	0.46777	-3.63704	0.000275791	0.0139343
ENSMUSG00000032826	Ank2	1215	1.31631	0.363054	3.62567	0.000288212	0.014514
ENSMUSG00000022483	Col2a1	24168.8	2.83059	0.781758	3.6208	0.000293697	0.0147416
ENSMUSG00000073295	Nudt11	62.3756	1.90025	0.525446	3.61646	0.000298663	0.0149419
ENSMUSG00000046275	Tusc5	1176.33	-3.30815	0.915081	-3.61514	0.00030018	0.0149689
ENSMUSG00000026922	Agpat2	1167.33	-2.27879	0.630679	-3.61324	0.0003024	0.014982
ENSMUSG00000051748	Wfdc21	166.359	-3.31623	0.91779	-3.61328	0.000302349	0.014982
ENSMUSG00000002831	Plin4	5575.39	-3.51283	0.973323	-3.60911	0.000307252	0.0151181
ENSMUSG00000021904	Sema3g	586.666	-1.7447	0.483467	-3.60873	0.000307704	0.0151181
ENSMUSG00000032081	Apoc3	20.7427	-6.56262	1.81871	-3.60838	0.00030811	0.0151181
ENSMUSG00000032554	Trf	1457.34	-3.13628	0.869736	-3.60601	0.000310935	0.0151596
ENSMUSG00000105033	Gm43423	61.0482	-1.9968	0.553728	-3.6061	0.000310832	0.0151596
ENSMUSG00000067786	Nnat	4337.85	-3.9078	1.08406	-3.60479	0.00031241	0.0151831
ENSMUSG00000078350	Smim1	260.279	-1.54321	0.42871	-3.59967	0.000318624	0.0154361
ENSMUSG00000024892	Pcx	2415.19	-2.57289	0.715513	-3.59586	0.000323318	0.0156141
ENSMUSG00000064366	mt-Tl2	163.196	-1.55595	0.433103	-3.59257	0.000327437	0.0157231
ENSMUSG00000073902	Gm1966	13.116	-7.3588	2.04843	-3.59241	0.000327629	0.0157231
ENSMUSG00000061762	Tac1	42.2457	3.36206	0.936745	3.58909	0.000331835	0.0158752
ENSMUSG00000052726	Kcnt2	198.892	1.77733	0.496713	3.57818	0.000345991	0.0165008
ENSMUSG00000030201	Lrp6	4340.16	1.09118	0.305129	3.57613	0.000348714	0.0165791
ENSMUSG00000074227	Spint2	338.724	-1.40064	0.391959	-3.57342	0.000352349	0.0167
ENSMUSG00000003526	Prodh	152.897	-2.20645	0.6184	-3.56799	0.000359728	0.0169971
ENSMUSG00000036334	Igsf10	4222.39	1.96952	0.552904	3.56214	0.000367837	0.0173268
ENSMUSG00000025902	Sox17	397.107	-2.11906	0.595653	-3.55754	0.000374338	0.017579
ENSMUSG00000029361	Nos1	84.3714	1.8519	0.520888	3.55527	0.000377589	0.0176774
ENSMUSG00000014773	Dll1	136.992	-1.61986	0.455916	-3.55298	0.000380892	0.0177385
ENSMUSG00000046561	Arsj	99.2332	1.99185	0.560648	3.55276	0.000381212	0.0177385
ENSMUSG00000028626	Col9a2	361.984	3.20265	0.903756	3.54372	0.00039453	0.0183026
ENSMUSG00000031295	Phka2	497.792	-1.16112	0.328172	-3.53814	0.000402952	0.0186368
ENSMUSG00000058743	Kcnj14	78.6283	-3.55758	1.00573	-3.5373	0.000404246	0.0186403
ENSMUSG00000028020	Glrb	172.172	2.18023	0.617887	3.52852	0.000417885	0.0191542
ENSMUSG00000041592	Sdk2	1803.41	2.01474	0.571056	3.52809	0.000418575	0.0191542
ENSMUSG00000054477	Kcnn2	94.8752	2.11793	0.600367	3.52773	0.000419142	0.0191542
ENSMUSG00000009876	Cox4i2	402.699	1.3412	0.380431	3.52547	0.000422739	0.0192447
ENSMUSG00000075042	4930431P03Rik	26.2978	3.10391	0.880566	3.5249	0.000423637	0.0192447
ENSMUSG00000010175	Prox1	130.402	1.53347	0.435515	3.52104	0.000429856	0.0194369
ENSMUSG00000022305	Lrp12	280.715	1.45213	0.41265	3.51902	0.00043314	0.0194369
ENSMUSG00000027068	Dhrs9	364.362	2.00815	0.570887	3.51759	0.000435485	0.0194369
ENSMUSG00000027533	Fabp5	589.041	-2.12136	0.602716	-3.51967	0.000432079	0.0194369
ENSMUSG00000028364	Tnc	12763.1	2.35531	0.669029	3.52049	0.000430742	0.0194369
ENSMUSG00000064349	mt-Tc	177.78	-1.3336	0.379072	-3.51806	0.000434713	0.0194369
ENSMUSG00000026385	Dbi	2145.2	-2.29504	0.654062	-3.50891	0.000449949	0.0200176
ENSMUSG00000054204	Alkal2	26.8531	-4.54587	1.29578	-3.50822	0.000451113	0.0200176
ENSMUSG00000033400	Agl	953.542	1.50547	0.429454	3.50555	0.000455661	0.020161
ENSMUSG00000030747	Dgat2	3915.58	-2.95147	0.842906	-3.50154	0.000462573	0.0204079
ENSMUSG00000000359	Rem1	128.493	-1.79306	0.512216	-3.50058	0.00046424	0.0204226
ENSMUSG00000032340	Neo1	2317.03	1.39359	0.398612	3.4961	0.00047211	0.020629
ENSMUSG00000037851	Iars	1215.49	1.23514	0.353479	3.49423	0.000475424	0.020629
ENSMUSG00000039987	Phtf2	464.087	1.36528	0.39056	3.49571	0.000472802	0.020629
ENSMUSG00000045664	Cdc42ep2	216.952	-1.39216	0.398431	-3.4941	0.000475671	0.020629
ENSMUSG00000049241	Hcar1	405.655	-3.29581	0.943089	-3.4947	0.000474601	0.020629
ENSMUSG00000000567	Sox9	728.34	2.03444	0.582499	3.49261	0.000478333	0.0206859
ENSMUSG00000052316	Lrrc15	131.211	2.95908	0.848421	3.48775	0.000487105	0.0210059
ENSMUSG00000045502	Hcar2	79.3296	-3.67878	1.05563	-3.48491	0.000492307	0.0211706
ENSMUSG00000028427	Aqp7	500.894	-3.00604	0.862969	-3.48337	0.000495145	0.0212166
ENSMUSG00000048138	Dmrt2	57.5727	-4.03935	1.15979	-3.48283	0.000496148	0.0212166
ENSMUSG00000092397	C130080G10Rik	17.4358	7.39576	2.12552	3.4795	0.000502354	0.0214221
ENSMUSG00000027016	Zfp385b	113.352	2.22987	0.64171	3.47489	0.000511066	0.0214943
ENSMUSG00000027559	Car3	25242.4	-3.07435	0.884687	-3.47507	0.000510723	0.0214943
ENSMUSG00000038463	Olfml2b	3158.87	1.39568	0.401323	3.4777	0.000505742	0.0214943
ENSMUSG00000088185	Scarna2	106.828	-1.73404	0.498985	-3.47514	0.000510595	0.0214943
ENSMUSG00000102460	Gm38197	57.9599	-2.14766	0.617841	-3.47607	0.000508814	0.0214943
ENSMUSG00000028036	Ptgfr	628.807	1.13943	0.328049	3.47335	0.000514	0.0215584
ENSMUSG00000060981	Hist1h4h	52.7091	-2.16265	0.622954	-3.4716	0.000517368	0.0216404
ENSMUSG00000027792	Bche	201.2	-2.86171	0.825626	-3.46611	0.000528045	0.0220268
ENSMUSG00000044986	Tst	540.002	-2.85487	0.823941	-3.4649	0.00053043	0.0220662
ENSMUSG00000030495	Slc7a10	730.467	-3.50392	1.01227	-3.46145	0.000537273	0.0222645
ENSMUSG00000054733	Msra	234.269	-1.27858	0.369422	-3.46103	0.000538106	0.0222645
ENSMUSG00000017314	Mpp2	188.18	-1.32203	0.382287	-3.4582	0.000543788	0.0223314
ENSMUSG00000021708	Rasgrf2	273.499	-2.09459	0.605714	-3.45805	0.000544099	0.0223314
ENSMUSG00000028348	Cavin4	91.0163	3.0495	0.881702	3.45865	0.000542884	0.0223314
ENSMUSG00000027796	Smad9	52.036	1.98437	0.574126	3.45633	0.000547586	0.0223587
ENSMUSG00000060675	Pla2g16	1549.42	-2.42619	0.701965	-3.45628	0.000547684	0.0223587
ENSMUSG00000023064	Sncg	712.785	-2.62799	0.763749	-3.44091	0.000579763	0.0236053
ENSMUSG00000012187	Mogat1	21.6972	-4.99807	1.45424	-3.43691	0.000588401	0.0238935
ENSMUSG00000003948	Mmd	1791.02	-3.21047	0.934475	-3.43558	0.000591283	0.023947
ENSMUSG00000010095	Slc3a2	2821.39	0.996917	0.290588	3.43069	0.000602052	0.0240648
ENSMUSG00000020142	Slc1a4	1646.21	1.991	0.580236	3.43136	0.00060057	0.0240648
ENSMUSG00000027489	Necab3	85	-1.64405	0.478987	-3.43236	0.000598362	0.0240648
ENSMUSG00000034667	Xpot	1934.18	1.13876	0.331837	3.43169	0.000599841	0.0240648
ENSMUSG00000045534	Kcna5	109.079	-2.72517	0.793826	-3.43296	0.000597036	0.0240648
ENSMUSG00000037139	Myom3	69.7094	-2.26146	0.660342	-3.42468	0.000615523	0.0245392
ENSMUSG00000068267	Cenpb	11080.9	-0.999308	0.29238	-3.41785	0.000631188	0.0250983
ENSMUSG00000038663	Fsd2	305.871	1.78648	0.522986	3.41592	0.00063567	0.0251766
ENSMUSG00000056973	Ces1d	685.975	-2.79334	0.81782	-3.41559	0.000636445	0.0251766
ENSMUSG00000064225	Paqr9	115.842	-2.43412	0.712865	-3.41456	0.00063885	0.0252066
ENSMUSG00000050108	Bpifc	21.2358	4.00233	1.17255	3.41335	0.000641683	0.0252533
ENSMUSG00000020256	Aldh1l2	2118.97	1.52982	0.449123	3.40623	0.000658665	0.025789
ENSMUSG00000031673	Cdh11	1679.97	1.68159	0.493615	3.40668	0.000657588	0.025789
ENSMUSG00000002504	Slc9a3r2	1392.4	-1.12019	0.329367	-3.40104	0.000671299	0.0262166
ENSMUSG00000073600	Prob1	86.5558	1.8083	0.532687	3.39468	0.000687092	0.0266972
ENSMUSG00000110439	Gm21320	17.8742	-5.32932	1.56986	-3.39477	0.000686866	0.0266972
ENSMUSG00000048126	Col6a3	41444.1	1.4805	0.436871	3.38887	0.000701809	0.0272
ENSMUSG00000017309	Cd300lg	1142.53	-2.14324	0.633453	-3.38343	0.000715869	0.0275725
ENSMUSG00000038370	Pcp4l1	260.856	-1.40838	0.416304	-3.38306	0.000716823	0.0275725
ENSMUSG00000047182	Irs3	193.194	-2.47433	0.731203	-3.38392	0.000714583	0.0275725
ENSMUSG00000002588	Pon1	141.945	-3.94628	1.16739	-3.38043	0.000723726	0.0276297
ENSMUSG00000014496	Ankrd28	788.845	1.16685	0.345169	3.38052	0.000723486	0.0276297
ENSMUSG00000071984	Fndc1	21281.6	1.67209	0.4945	3.38137	0.000721261	0.0276297
ENSMUSG00000022525	Hrasls	105.789	2.5044	0.741354	3.37815	0.000729764	0.027791
ENSMUSG00000022579	Gpihbp1	477.53	-2.33787	0.692905	-3.37401	0.000740808	0.0280719
ENSMUSG00000048997	Atxn7l2	265.788	-1.37816	0.408413	-3.37442	0.000739718	0.0280719
ENSMUSG00000074818	Pdzd7	242.707	1.41066	0.418423	3.37136	0.000747981	0.0282737
ENSMUSG00000047496	Rnf152	531.56	-1.81902	0.539763	-3.37003	0.000751592	0.0283402
ENSMUSG00000051225	Fam83a	75.2293	-3.59797	1.06844	-3.3675	0.000758526	0.0285314
ENSMUSG00000029499	Pxmp2	91.892	-2.69131	0.799457	-3.36643	0.000761488	0.0285726
ENSMUSG00000054641	Mmrn1	274.965	1.20945	0.360234	3.35739	0.000786827	0.0294512
ENSMUSG00000023972	Ptk7	523.148	1.24081	0.369799	3.35537	0.000792598	0.0295948
ENSMUSG00000026834	Acvr1c	491.839	-3.52952	1.05391	-3.34897	0.000811132	0.0300352
ENSMUSG00000031750	Il34	408.973	-1.42352	0.425059	-3.349	0.000811049	0.0300352
ENSMUSG00000032387	Rbpms2	95.5818	-2.39715	0.715542	-3.35012	0.000807773	0.0300352
ENSMUSG00000045065	9930022D16Rik	24.9199	-6.78382	2.02587	-3.34859	0.000812241	0.0300352
ENSMUSG00000084803	5830444B04Rik	181.197	-2.13331	0.637246	-3.34769	0.000814867	0.0300598
ENSMUSG00000046223	Plaur	262.888	1.33107	0.397947	3.34485	0.000823282	0.0302972
ENSMUSG00000030607	Acan	8076.66	2.55546	0.765786	3.33704	0.000846756	0.0310863
ENSMUSG00000059498	Fcgr3	815.332	-1.71722	0.515736	-3.32964	0.000869576	0.0318477
ENSMUSG00000035929	H2-Q4	659.569	-1.82966	0.549999	-3.32666	0.000878928	0.0319608
ENSMUSG00000049173	Myoz3	43.2022	3.61543	1.08668	3.32704	0.00087773	0.0319608
ENSMUSG00000090145	Ugt1a6b	21.7951	-5.02082	1.50874	-3.32781	0.000875304	0.0319608
ENSMUSG00000028834	Trim63	124.182	3.69598	1.11246	3.32234	0.00089265	0.0323829
ENSMUSG00000045377	Tmem88	225.449	-2.01384	0.606628	-3.31973	0.000901046	0.0326102
ENSMUSG00000028475	Spaar	87.3072	-2.17885	0.656559	-3.31858	0.000904763	0.0326675
ENSMUSG00000063415	Cyp26b1	945.498	2.10489	0.634793	3.31587	0.000913582	0.0329083
ENSMUSG00000019326	Aoc3	2963.09	-2.92522	0.882975	-3.31291	0.000923318	0.0330725
ENSMUSG00000039031	Arhgap18	452.398	-1.3513	0.40794	-3.31251	0.000924621	0.0330725
ENSMUSG00000056124	B4galt6	751.622	1.2935	0.390407	3.31321	0.000922323	0.0330725
ENSMUSG00000001946	Esam	1015	-1.94064	0.586613	-3.30821	0.000938946	0.0335066
ENSMUSG00000002997	Prkar2b	1294.97	-3.11606	0.94251	-3.30613	0.000945932	0.0336774
ENSMUSG00000039865	Slc44a3	60.4089	-2.87896	0.872044	-3.30139	0.00096206	0.034093
ENSMUSG00000097124	A530020G20Rik	138.396	-2.84052	0.860273	-3.30188	0.000960377	0.034093
ENSMUSG00000078922	Tgtp1	29.1618	-3.10046	0.939767	-3.29918	0.000969684	0.0342838
ENSMUSG00000042082	Arsb	718.134	1.00719	0.30548	3.29706	0.000977017	0.0344265
ENSMUSG00000091318	Gm5415	22.9482	-3.36739	1.02144	-3.29672	0.000978218	0.0344265
ENSMUSG00000024059	Clip4	511.129	1.94529	0.59058	3.29387	0.00098818	0.0346795
ENSMUSG00000089855	NA	78.6792	-3.33389	1.0123	-3.29337	0.000989936	0.0346795
ENSMUSG00000068196	Col8a1	6649.29	1.85378	0.563369	3.29052	0.00100003	0.0348657
ENSMUSG00000071847	Apcdd1	721.799	-1.86457	0.566749	-3.28994	0.00100208	0.0348657
ENSMUSG00000097482	Gm17634	15.2129	-4.42135	1.34347	-3.291	0.000998324	0.0348657
ENSMUSG00000020787	P2rx1	47.4668	-2.60337	0.791602	-3.28874	0.00100636	0.0349351
ENSMUSG00000021792	Fam213a	535.696	-2.27852	0.693039	-3.28773	0.00101	0.0349549
ENSMUSG00000029482	Aacs	1171.88	-1.47199	0.44778	-3.28731	0.0010115	0.0349549
ENSMUSG00000087006	Gm13889	307.066	-1.52502	0.464182	-3.2854	0.00101838	0.0351134
ENSMUSG00000050105	Grrp1	284.684	-2.02384	0.617691	-3.27646	0.00105118	0.0361629
ENSMUSG00000111774	AC166078.1	21.9834	-2.84671	0.869245	-3.27493	0.00105689	0.036278
ENSMUSG00000034645	Zyg11a	34.7075	-4.44013	1.35624	-3.27385	0.00106094	0.0363353
ENSMUSG00000025089	Gfra1	231.463	1.76043	0.538914	3.26662	0.00108838	0.037192
ENSMUSG00000069372	Ctxn3	28.451	3.01204	0.923573	3.26129	0.00110908	0.037815
ENSMUSG00000042293	Gm5617	112.134	-1.67299	0.513846	-3.25582	0.00113065	0.0384648
ENSMUSG00000024371	C2	287.728	-2.69902	0.829226	-3.25487	0.00113445	0.0385083
ENSMUSG00000046470	Sox18	648.737	-1.73753	0.534152	-3.25288	0.00114241	0.0386927
ENSMUSG00000074771	Ankef1	285.909	-3.52769	1.08531	-3.2504	0.00115243	0.0389461
ENSMUSG00000028713	Cyp4b1	406.713	-2.64664	0.814702	-3.2486	0.00115976	0.0391072
ENSMUSG00000028539	Artn	69.5934	1.6172	0.498112	3.24667	0.00116764	0.0392866
ENSMUSG00000027122	Arl14ep	603.847	1.05145	0.324073	3.2445	0.00117658	0.0395007
ENSMUSG00000028047	Thbs3	2990.08	1.56277	0.48194	3.24267	0.00118414	0.0396675
ENSMUSG00000021250	Fos	319.483	1.29635	0.399908	3.24161	0.00118858	0.0397293
ENSMUSG00000016194	Hsd11b1	108.787	-1.88812	0.582762	-3.23994	0.00119554	0.0398747
ENSMUSG00000017007	Rbpjl	188.21	2.30876	0.712822	3.2389	0.00119994	0.0399344
ENSMUSG00000026355	Mcm6	242.573	1.18823	0.367023	3.23747	0.00120593	0.0400328
ENSMUSG00000027313	Chac1	626.433	1.84239	0.569173	3.23696	0.00120812	0.0400328
ENSMUSG00000049265	Kcnk3	347.048	-2.27288	0.702576	-3.23506	0.00121616	0.0402121
ENSMUSG00000021831	Ero1l	413.921	1.16539	0.360373	3.23385	0.00122133	0.0402959
ENSMUSG00000017817	Jph2	1689.38	1.88608	0.584003	3.22958	0.00123973	0.0406402
ENSMUSG00000034957	Cebpa	3987.43	-2.68735	0.831883	-3.23045	0.00123598	0.0406402
ENSMUSG00000041750	Cd1d2	30.1603	-2.65197	0.821106	-3.22976	0.00123896	0.0406402
ENSMUSG00000030972	Acsm5	17.4298	-4.68576	1.45157	-3.22805	0.00124636	0.0407704
ENSMUSG00000098915	Rpl15-ps2	19.4856	-4.42289	1.37189	-3.22393	0.00126444	0.0412735
ENSMUSG00000039661	Dusp26	208.266	-1.72087	0.534028	-3.22243	0.00127106	0.0414015
ENSMUSG00000002020	Ltbp2	1383.52	1.4923	0.463437	3.22008	0.00128156	0.041587
ENSMUSG00000029195	Klb	77.9194	-3.72862	1.15798	-3.21994	0.00128219	0.041587
ENSMUSG00000023088	Abcc1	1979.16	1.29844	0.403953	3.21434	0.00130747	0.0421794
ENSMUSG00000026748	Plxdc2	4398.2	1.49797	0.466155	3.21346	0.00131148	0.0421794
ENSMUSG00000038781	Stap2	122.024	-1.36213	0.423769	-3.21432	0.00130753	0.0421794
ENSMUSG00000044562	Rasip1	566.342	-1.67657	0.521649	-3.21398	0.00130909	0.0421794
ENSMUSG00000008206	Cers4	590.295	-1.14467	0.356522	-3.21067	0.00132428	0.0422351
ENSMUSG00000021098	4930447C04Rik	73.6384	1.69079	0.526561	3.21101	0.0013227	0.0422351
ENSMUSG00000022040	Ephx2	350.696	-2.82925	0.881366	-3.21007	0.001327	0.0422351
ENSMUSG00000029314	Gpat3	333.255	-2.627	0.817763	-3.21243	0.00131619	0.0422351
ENSMUSG00000045659	Plekha7	238.183	-1.15892	0.360943	-3.21079	0.00132368	0.0422351
ENSMUSG00000041696	Rasl12	295.987	-1.85672	0.578629	-3.20883	0.00133277	0.0423048
ENSMUSG00000097187	Gm19426	30.061	-2.31543	0.721675	-3.20841	0.00133472	0.0423048
ENSMUSG00000012428	Steap4	2980.36	-2.69122	0.839829	-3.20448	0.00135306	0.0427094
ENSMUSG00000041378	Cldn5	833.646	-1.18698	0.370403	-3.20456	0.0013527	0.0427094
ENSMUSG00000026958	Dpp7	366.406	1.07861	0.337342	3.19739	0.00138679	0.0436229
ENSMUSG00000104621	Gm43185	46.8039	-1.92899	0.603337	-3.1972	0.0013877	0.0436229
ENSMUSG00000030317	Timp4	437.129	-2.56934	0.804659	-3.19308	0.00140763	0.0441585
ENSMUSG00000026305	Lrrfip1	1358.7	0.939673	0.294701	3.18857	0.0014298	0.0447622
ENSMUSG00000101249	Gm29216	48.4663	-1.80675	0.567222	-3.18527	0.00144619	0.0451832
ENSMUSG00000074923	Pak6	45.203	-3.74321	1.17565	-3.18396	0.00145276	0.0452868
ENSMUSG00000101599	Gm20342	171.637	-1.19832	0.376425	-3.18343	0.00145543	0.0452868
ENSMUSG00000043924	Ncmap	45.3949	-1.93318	0.607395	-3.18274	0.00145889	0.0453025
ENSMUSG00000036585	Fgf1	254.203	-1.11662	0.351057	-3.18073	0.00146903	0.045433
ENSMUSG00000052852	Reep1	261.116	1.69976	0.534348	3.18099	0.00146773	0.045433
ENSMUSG00000030513	Pcsk6	3523.66	1.91831	0.603451	3.1789	0.00147835	0.0455372
ENSMUSG00000079037	Prnp	7172.65	0.914071	0.287499	3.17939	0.00147586	0.0455372
ENSMUSG00000045201	Lrrc3b	36.1906	-2.27904	0.717502	-3.17635	0.00149141	0.0457554
ENSMUSG00000058145	Adamts17	315.355	1.29657	0.40818	3.17645	0.00149087	0.0457554
ENSMUSG00000050014	Apol10b	34.8061	-2.72367	0.857981	-3.17451	0.00150092	0.0459551
ENSMUSG00000031808	Slc27a1	2079.17	-2.32385	0.732399	-3.17293	0.00150907	0.0461126
ENSMUSG00000033170	Card10	490.408	-1.71804	0.541933	-3.17021	0.00152326	0.0464535
ENSMUSG00000111264	E030022I16Rik	39.9798	-1.9947	0.62952	-3.16861	0.00153169	0.0466175
ENSMUSG00000029032	Arhgef16	53.1427	-2.2978	0.725439	-3.16746	0.00153775	0.0466289
ENSMUSG00000057262	Gm10020	33.6331	-3.7082	1.17074	-3.16739	0.00153815	0.0466289
ENSMUSG00000025321	Itgb8	156.445	1.318	0.416344	3.16564	0.00154742	0.0468171
ENSMUSG00000035745	Grin3b	53.2661	-2.02583	0.640684	-3.16198	0.001567	0.0473161
ENSMUSG00000042770	Hebp1	463.81	-1.86194	0.589456	-3.15874	0.00158453	0.0477511
ENSMUSG00000024589	Nedd4l	406.179	-1.02635	0.325192	-3.15613	0.0015988	0.0479152
ENSMUSG00000064351	mt-Co1	227853	-1.13054	0.358217	-3.15602	0.00159936	0.0479152
ENSMUSG00000103195	Gm37644	58.8124	-1.77265	0.561558	-3.15666	0.00159588	0.0479152
ENSMUSG00000034845	Plvap	4417.73	-1.76163	0.558895	-3.15199	0.00162159	0.0483759
ENSMUSG00000048200	Cracr2b	427.245	-1.19959	0.380638	-3.15152	0.00162422	0.0483759
ENSMUSG00000090066	1110002E22Rik	376.096	2.99289	0.949656	3.15155	0.00162405	0.0483759
ENSMUSG00000023908	Pkmyt1	87.2176	-1.40943	0.447651	-3.1485	0.00164111	0.0485952
ENSMUSG00000030048	Gkn3	35.6301	-2.87723	0.913726	-3.1489	0.00163889	0.0485952
ENSMUSG00000055546	Timd4	24.3387	-3.04477	0.967025	-3.1486	0.00164055	0.0485952
ENSMUSG00000023004	Tuba1b	2352.8	-0.983446	0.313021	-3.14179	0.00167918	0.0492462
ENSMUSG00000035948	Acss3	143.622	-2.63778	0.839169	-3.14332	0.00167043	0.0492462
ENSMUSG00000038253	Hoxa5	120.29	-1.47743	0.470044	-3.14317	0.0016713	0.0492462
ENSMUSG00000052516	Robo2	101.426	1.76286	0.561061	3.14201	0.00167793	0.0492462
ENSMUSG00000064347	mt-Ta	91.1978	-1.53437	0.488369	-3.14183	0.00167896	0.0492462
ENSMUSG00000021109	Hif1a	2684.45	1.15087	0.366513	3.14005	0.00168921	0.0494457
ENSMUSG00000031725	Ces1f	78.8886	-2.17055	0.691775	-3.13765	0.00170308	0.0497565
ENSMUSG00000005373	Mlxipl	341.913	-2.01459	0.642742	-3.13437	0.00172221	0.0502197
ENSMUSG00000036437	Npy1r	144.451	-1.80505	0.5763	-3.13214	0.0017354	0.0505081
ENSMUSG00000053128	Rnf26	142.868	1.2724	0.40659	3.12943	0.00175146	0.0508155
ENSMUSG00000054200	Ffar4	25.1286	-2.9801	0.952341	-3.12924	0.0017526	0.0508155
ENSMUSG00000065564	Mirlet7b	49.4285	-1.97747	0.632582	-3.12603	0.00177181	0.0512752
ENSMUSG00000072893	4933439C10Rik	154.813	-1.19728	0.384047	-3.11755	0.00182364	0.0526757
ENSMUSG00000020377	Ltc4s	146.775	-2.08769	0.670312	-3.11451	0.00184251	0.0529717
ENSMUSG00000041445	Mmrn2	1025.94	-1.84704	0.593071	-3.11437	0.0018434	0.0529717
ENSMUSG00000069763	Tmem100	274.868	1.11479	0.357966	3.11423	0.00184427	0.0529717
ENSMUSG00000011148	Adssl1	542.814	2.44782	0.787163	3.10967	0.00187295	0.0535945
ENSMUSG00000045136	Tubb2b	143.814	1.67649	0.539101	3.10978	0.00187229	0.0535945
ENSMUSG00000024866	Acy3	80.2069	-2.12766	0.68454	-3.10816	0.00188254	0.0537684
ENSMUSG00000020363	Gfpt2	482.106	1.3375	0.431214	3.10172	0.00192403	0.0548508
ENSMUSG00000088246	Gm25911	28.2686	-3.88778	1.25438	-3.09936	0.00193936	0.0551852
ENSMUSG00000001348	Acp5	1620.55	-2.42735	0.784098	-3.09572	0.00196333	0.0557637
ENSMUSG00000027301	Oxt	41.4301	-3.20977	1.03737	-3.09413	0.0019739	0.0558565
ENSMUSG00000109807	Gm45244	32.8993	-2.79188	0.902205	-3.09451	0.00197139	0.0558565
ENSMUSG00000026921	Egfl7	1255.67	-1.58297	0.511832	-3.09276	0.00198302	0.0560113
ENSMUSG00000102153	Gm37474	43.0703	-2.10772	0.682224	-3.08948	0.00200507	0.0564337
ENSMUSG00000104626	Gm42675	44.1535	-1.89646	0.613852	-3.08944	0.00200535	0.0564337
ENSMUSG00000057182	Scn3a	60.9081	1.64772	0.533449	3.08881	0.00200962	0.05645
ENSMUSG00000055725	Paqr3	74.1952	1.67787	0.543467	3.08734	0.00201953	0.0566246
ENSMUSG00000022490	Ppp1r1a	154.105	-2.46249	0.798371	-3.08439	0.0020397	0.0567742
ENSMUSG00000022555	Dgat1	735.316	-2.04136	0.661771	-3.08469	0.00203762	0.0567742
ENSMUSG00000028121	Bcar3	291.521	-1.76271	0.571353	-3.08515	0.00203451	0.0567742
ENSMUSG00000050896	Rtn4rl2	20.9084	-3.90708	1.26671	-3.08443	0.00203944	0.0567742
ENSMUSG00000041417	Pik3r1	3600.37	-0.978512	0.317449	-3.08243	0.00205321	0.0570465
ENSMUSG00000035885	Cox8a	1927.66	-1.00991	0.327917	-3.07978	0.00207152	0.057451
ENSMUSG00000044017	Adgrd1	503.57	1.1141	0.36206	3.07711	0.00209018	0.0578637
ENSMUSG00000033849	B3galt2	503.586	-2.96911	0.965231	-3.07607	0.0020975	0.0579615
ENSMUSG00000021185	Dglucy	126.383	-2.0645	0.671295	-3.07539	0.00210225	0.057988
ENSMUSG00000075010	AW112010	68.0673	-2.31448	0.75279	-3.07454	0.0021083	0.0580502
ENSMUSG00000074264	Amy1	430.831	-2.87516	0.93572	-3.07267	0.00212153	0.0583096
ENSMUSG00000026826	Nr4a2	755.118	1.87555	0.611019	3.06954	0.00214386	0.0588179
ENSMUSG00000027931	Npr1	1285.74	-1.38423	0.451114	-3.06846	0.00215164	0.0588205
ENSMUSG00000032135	Mcam	1498.17	-2.22923	0.726492	-3.06849	0.00215142	0.0588205
ENSMUSG00000044217	Aqp5	326.606	1.72237	0.561849	3.06553	0.00217285	0.0592943
ENSMUSG00000043639	Rbm20	68.9745	1.96072	0.639723	3.06494	0.0021771	0.0593047
ENSMUSG00000027660	Skil	990.394	1.10786	0.36199	3.06046	0.00220999	0.0600498
ENSMUSG00000028613	Lrp8	86.5399	1.84942	0.604424	3.05981	0.00221477	0.0600498
ENSMUSG00000083863	Gm13341	46.1559	-1.81432	0.59299	-3.05961	0.00221622	0.0600498
ENSMUSG00000000686	Abhd15	122.608	-3.10641	1.01597	-3.0576	0.00223119	0.0603485
ENSMUSG00000070047	Fat1	3571.11	1.30477	0.426912	3.0563	0.00224087	0.0605034
ENSMUSG00000047819	Tigd4	71.3461	3.24588	1.06243	3.05516	0.00224939	0.0606267
ENSMUSG00000018339	Gpx3	2437.91	-1.49344	0.489024	-3.05393	0.00225867	0.0607697
ENSMUSG00000102070	Gm28661	83.6647	-1.51692	0.497156	-3.05119	0.0022794	0.0612198
ENSMUSG00000020715	Ern1	697.758	1.05674	0.346631	3.04859	0.00229916	0.0614492
ENSMUSG00000022367	Has2	100.08	1.46123	0.47937	3.04823	0.00230193	0.0614492
ENSMUSG00000034457	Eda2r	76.7733	1.48283	0.486455	3.04825	0.0023018	0.0614492
ENSMUSG00000039037	St6galnac5	145.917	-3.3962	1.11445	-3.04744	0.00230801	0.0614492
ENSMUSG00000044122	Proca1	109.028	-2.33459	0.766022	-3.04769	0.00230609	0.0614492
ENSMUSG00000088088	Rmrp	73.6582	-2.59573	0.852682	-3.0442	0.00233299	0.0620064
ENSMUSG00000021751	Acox2	21.5411	2.8926	0.950563	3.04303	0.00234206	0.0621397
ENSMUSG00000000693	Loxl3	3837.02	1.68344	0.553536	3.04125	0.00235602	0.0624019
ENSMUSG00000008540	Mgst1	1667.54	-1.79564	0.590639	-3.04016	0.00236451	0.0624153
ENSMUSG00000041202	Pla2g2d	16.8442	-3.57535	1.17605	-3.04014	0.00236468	0.0624153
ENSMUSG00000042734	Ttc9	131.364	1.57643	0.51893	3.03785	0.00238275	0.062784
ENSMUSG00000029810	Tmem176b	1864.52	-0.942249	0.310233	-3.03723	0.0023876	0.0628036
ENSMUSG00000063531	Sema3e	929.775	2.06903	0.681449	3.03623	0.00239557	0.0629053
ENSMUSG00000023034	Nr4a1	860.467	1.54184	0.507922	3.03558	0.00240075	0.0629333
ENSMUSG00000105703	Gm43305	128.993	1.35626	0.447199	3.03278	0.00242311	0.0634108
ENSMUSG00000045414	1190002N15Rik	1238.54	1.0971	0.362123	3.02964	0.00244844	0.0639645
ENSMUSG00000028996	Rbp7	324.234	-1.98986	0.657051	-3.02848	0.0024579	0.0641023
ENSMUSG00000024140	Epas1	3280.33	-1.60449	0.530101	-3.02676	0.00247191	0.064358
ENSMUSG00000054072	Iigp1	306.886	-1.85111	0.612362	-3.0229	0.00250367	0.0650742
ENSMUSG00000035840	Lysmd3	333.561	1.01307	0.335449	3.02004	0.00252739	0.0655793
ENSMUSG00000048096	Lmod1	151.418	-1.4176	0.469531	-3.01919	0.00253452	0.0656531
ENSMUSG00000055782	Abcd2	1401.8	-2.67025	0.884709	-3.01822	0.00254262	0.0657516
ENSMUSG00000062619	2310039H08Rik	217.757	-1.16543	0.386304	-3.01688	0.00255387	0.0659312
ENSMUSG00000040147	Maob	281.337	-1.99504	0.661572	-3.0156	0.0025647	0.0660785
ENSMUSG00000056880	Gadl1	80.9495	3.04895	1.01125	3.01504	0.00256943	0.0660785
ENSMUSG00000073209	Klf14	17.7473	-2.83818	0.941455	-3.01468	0.00257252	0.0660785
ENSMUSG00000019437	Tlcd1	450.444	-0.990057	0.328599	-3.01296	0.00258709	0.0663413
ENSMUSG00000002058	Unc119	205.881	-1.09394	0.363287	-3.01122	0.00260201	0.0666123
ENSMUSG00000022676	Snai2	335.744	1.19543	0.397123	3.01024	0.00261042	0.0667161
ENSMUSG00000079055	Slc8a3	199.211	2.13788	0.711104	3.00642	0.00264348	0.0674483
ENSMUSG00000002944	Cd36	7329.51	-2.53098	0.843581	-3.00028	0.00269732	0.0687076
ENSMUSG00000005952	Trpv1	35.4478	-3.39496	1.13384	-2.99421	0.00275159	0.0689478
ENSMUSG00000006342	Susd2	298.809	-1.00801	0.336596	-2.99472	0.00274697	0.0689478
ENSMUSG00000020743	Mif4gd	516.834	-1.20961	0.403893	-2.99487	0.0027456	0.0689478
ENSMUSG00000028795	Ccdc28b	311.666	-1.08414	0.361932	-2.99541	0.00274074	0.0689478
ENSMUSG00000037936	Scarb1	2128.37	-2.05256	0.685358	-2.99487	0.00274558	0.0689478
ENSMUSG00000039286	Fndc3b	4134.67	1.02563	0.342262	2.99662	0.00272994	0.0689478
ENSMUSG00000042828	Trim72	255.163	2.50534	0.836479	2.99511	0.00274349	0.0689478
ENSMUSG00000068079	Tcf15	154.336	-2.12774	0.709793	-2.99769	0.00272032	0.0689478
ENSMUSG00000075389	2810410L24Rik	97.9564	-1.39094	0.464548	-2.99419	0.00275179	0.0689478
ENSMUSG00000085211	B430219N15Rik	14.1123	-3.93795	1.31485	-2.99497	0.0027447	0.0689478
ENSMUSG00000038077	Kcna6	346.646	1.27136	0.424683	2.99366	0.00275651	0.0689534
ENSMUSG00000022043	Trim35	2308.88	0.915599	0.306023	2.99193	0.0027722	0.0692326
ENSMUSG00000035606	Ky	370.541	3.25702	1.08991	2.98834	0.00280498	0.0697101
ENSMUSG00000055489	Ano5	131.213	3.40963	1.14094	2.98843	0.00280417	0.0697101
ENSMUSG00000071540	3425401B19Rik	210.797	2.92303	0.977866	2.9892	0.00279711	0.0697101
ENSMUSG00000024493	Lars	1152.87	0.908912	0.30426	2.98728	0.00281469	0.0698381
ENSMUSG00000057337	Chst3	328.464	1.63105	0.546139	2.98651	0.00282179	0.0699009
ENSMUSG00000056708	Ier5	449.151	-0.975703	0.326874	-2.98495	0.0028362	0.0701445
ENSMUSG00000097284	4930480K23Rik	27.0688	-2.20604	0.739344	-2.98378	0.00284712	0.0703008
ENSMUSG00000027513	Pck1	3807.87	-2.81236	0.943263	-2.98152	0.00286818	0.070707
ENSMUSG00000049866	Arl4c	235.786	1.05236	0.353147	2.97995	0.00288296	0.070957
ENSMUSG00000071347	C1qtnf9	493.304	-2.07145	0.695459	-2.97853	0.00289634	0.0711717
ENSMUSG00000038201	Kcna7	93.7084	3.04193	1.02177	2.97714	0.00290955	0.0713818
ENSMUSG00000041479	Syt15	249.42	-1.55169	0.52157	-2.97504	0.00292948	0.0717558
ENSMUSG00000104388	Gm37033	94.5245	-1.40849	0.473745	-2.97309	0.00294814	0.0720975
ENSMUSG00000042182	Bend6	99.2166	1.62825	0.547895	2.97184	0.00296024	0.0722779
ENSMUSG00000024338	Psmb8	274.36	-1.70331	0.573775	-2.96861	0.00299153	0.0726942
ENSMUSG00000037166	Ppp1r14a	183.513	-1.23447	0.415771	-2.9691	0.00298677	0.0726942
ENSMUSG00000047686	Rtl3	124.682	1.54223	0.519474	2.96883	0.00298934	0.0726942
ENSMUSG00000065080	Gm26497	13.121	-3.43431	1.15724	-2.96767	0.00300069	0.0728011
ENSMUSG00000026043	Col3a1	190744	1.16362	0.392193	2.96697	0.00300754	0.0728519
ENSMUSG00000021388	Aspn	2403.84	1.46661	0.494463	2.96606	0.00301642	0.0728647
ENSMUSG00000056515	Rab31	1320.52	0.971862	0.327728	2.96546	0.00302235	0.0728647
ENSMUSG00000102657	Gm37899	102.059	-1.74874	0.589681	-2.96557	0.00302126	0.0728647
ENSMUSG00000020176	Grb10	3048.51	1.25917	0.424964	2.963	0.00304654	0.0733326
ENSMUSG00000029778	Adcyap1r1	81.6321	-1.54404	0.521315	-2.96181	0.00305837	0.0735017
ENSMUSG00000027894	Slc6a17	136.501	1.21805	0.411365	2.961	0.00306645	0.0735804
ENSMUSG00000032579	Hemk1	178.976	-1.24151	0.419545	-2.95917	0.00308465	0.0739012
ENSMUSG00000038648	Creb3l2	1789.8	1.06941	0.361505	2.95822	0.00309417	0.0740136
ENSMUSG00000023832	Acat2	260.627	-1.73017	0.585623	-2.95441	0.0031327	0.0748183
ENSMUSG00000025492	Ifitm3	2330.92	-0.892605	0.302176	-2.95393	0.00313759	0.0748183
ENSMUSG00000035504	Reep6	109.624	-2.76468	0.936679	-2.95157	0.00316159	0.0752734
ENSMUSG00000023000	Dhh	62.6788	-1.62488	0.55094	-2.94929	0.00318502	0.0752996
ENSMUSG00000024726	Carnmt1	263.009	1.19101	0.40361	2.95089	0.00316857	0.0752996
ENSMUSG00000026407	Cacna1s	481.261	3.22793	1.09449	2.94926	0.00318531	0.0752996
ENSMUSG00000026836	Acvr1	731.181	1.04838	0.355446	2.94949	0.00318302	0.0752996
ENSMUSG00000029219	Slc10a4	12.4298	4.44259	1.50644	2.94907	0.00318728	0.0752996
ENSMUSG00000020085	Aifm2	866.525	-2.31971	0.787062	-2.9473	0.00320559	0.0756153
ENSMUSG00000015222	Map2	486.367	1.34282	0.455808	2.94602	0.0032189	0.0757215
ENSMUSG00000020048	Hsp90b1	9912.24	0.930157	0.315828	2.94513	0.00322814	0.0757215
ENSMUSG00000037872	Ackr1	345.924	-1.25394	0.425787	-2.94499	0.00322962	0.0757215
ENSMUSG00000078771	Evi2a	237.769	1.05498	0.358231	2.94497	0.00322987	0.0757215
ENSMUSG00000028031	Dkk2	2989.1	-1.23962	0.421026	-2.94429	0.00323701	0.0757729
ENSMUSG00000022217	Emc9	207.509	-1.28972	0.438788	-2.93929	0.00328969	0.0765378
ENSMUSG00000024395	Lims2	586.041	-1.7021	0.578858	-2.94045	0.00327741	0.0765378
ENSMUSG00000049134	Nrap	644.326	2.60328	0.885588	2.9396	0.00328634	0.0765378
ENSMUSG00000087408	Cers1	52.9274	1.61802	0.550366	2.9399	0.00328319	0.0765378
ENSMUSG00000023393	Slc17a9	390.269	-1.30803	0.445202	-2.93806	0.00330274	0.0767248
ENSMUSG00000015467	Egfl8	117.185	-1.28497	0.437562	-2.93665	0.0033178	0.0768272
ENSMUSG00000015656	Hspa8	8272.46	0.908333	0.309255	2.93717	0.00331223	0.0768272
ENSMUSG00000037727	Avp	30.9388	-2.32212	0.79085	-2.93624	0.0033222	0.0768272
ENSMUSG00000033065	Pfkm	2422.62	1.89615	0.646139	2.93459	0.00333992	0.0771204
ENSMUSG00000018796	Acsl1	3752.01	-2.54915	0.868836	-2.93399	0.00334638	0.0771531
ENSMUSG00000028194	Ddah1	335.021	1.78283	0.608316	2.93075	0.00338141	0.0775282
ENSMUSG00000038007	Acer2	232.214	-2.56103	0.874027	-2.93015	0.00338797	0.0775282
ENSMUSG00000044393	Dsg2	32.7962	2.40237	0.819845	2.93027	0.00338666	0.0775282
ENSMUSG00000061603	Akap6	154.457	1.36569	0.465866	2.93151	0.00337316	0.0775282
ENSMUSG00000111854	Gm48740	35.7933	-1.89735	0.647406	-2.93069	0.00338206	0.0775282
ENSMUSG00000016995	Matn4	3162.3	1.94891	0.665479	2.92857	0.0034052	0.0777922
ENSMUSG00000075590	Nrbp2	796.103	-1.12341	0.383657	-2.92817	0.00340966	0.0777922
ENSMUSG00000039496	Cdnf	74.9201	1.69006	0.577382	2.92711	0.00342124	0.0778258
ENSMUSG00000064348	mt-Tn	371.404	-1.14234	0.390264	-2.92711	0.0034213	0.0778258
ENSMUSG00000040170	Fmo2	232.544	-2.33149	0.798013	-2.92162	0.00348218	0.0790929
ENSMUSG00000031960	Aars	2455.73	1.0131	0.346876	2.92063	0.00349328	0.0792275
ENSMUSG00000038763	Alpk3	150.015	2.19551	0.752135	2.91904	0.00351109	0.0795138
ENSMUSG00000021898	Asb14	61.0336	2.30984	0.793185	2.91211	0.00358999	0.0809886
ENSMUSG00000031530	Dusp4	259.747	-3.10999	1.06769	-2.91281	0.00358192	0.0809886
ENSMUSG00000083443	Gm15519	12.7521	-4.21989	1.4494	-2.91147	0.00359738	0.0809886
ENSMUSG00000107719	Gm43937	25.0651	-2.13069	0.73179	-2.91161	0.0035957	0.0809886
ENSMUSG00000052353	Cemip	182.93	2.19196	0.753249	2.91001	0.00361415	0.0812468
ENSMUSG00000031980	Agt	179.333	-2.5336	0.870945	-2.90903	0.00362555	0.0813835
ENSMUSG00000031748	Gnao1	478.668	1.09296	0.375798	2.90836	0.00363327	0.0814324
ENSMUSG00000033063	Cntnap3	39.5502	3.33729	1.14784	2.90747	0.00364368	0.0814324
ENSMUSG00000076441	Ass1	213.913	1.41941	0.488162	2.90766	0.00364146	0.0814324
ENSMUSG00000026179	Pnkd	556.632	-0.902323	0.310458	-2.90642	0.00365585	0.0815851
ENSMUSG00000002083	Bbc3	267.551	-0.99884	0.343796	-2.90532	0.00366872	0.0817532
ENSMUSG00000023800	Tiam2	402.949	1.24727	0.429524	2.90385	0.00368603	0.0819286
ENSMUSG00000027602	Map1lc3a	1723.44	-0.950378	0.327294	-2.90374	0.0036873	0.0819286
ENSMUSG00000018761	Mpdu1	602.799	-0.962144	0.331538	-2.90206	0.00370718	0.0821321
ENSMUSG00000043993	2900052L18Rik	52.7947	-1.68956	0.582136	-2.90235	0.00370377	0.0821321
ENSMUSG00000027474	Ccm2l	208.721	-1.58443	0.546113	-2.90129	0.00371626	0.0822141
ENSMUSG00000038239	Hrc	566.285	2.49286	0.859578	2.9001	0.00373049	0.0824099
ENSMUSG00000021456	Fbp2	44.3895	2.11901	0.732312	2.8936	0.00380858	0.0836353
ENSMUSG00000026600	Soat1	449.361	1.02876	0.355504	2.89379	0.00380622	0.0836353
ENSMUSG00000026778	Prkcq	73.3616	1.47574	0.509995	2.89363	0.00380816	0.0836353
ENSMUSG00000038188	Scarf1	269.45	-1.51649	0.524155	-2.89321	0.00381328	0.0836353
ENSMUSG00000050663	Trhde	161.117	-1.37445	0.475004	-2.89356	0.00380902	0.0836353
ENSMUSG00000028076	Cd1d1	382.258	-2.17246	0.751107	-2.89234	0.00382384	0.0837471
ENSMUSG00000050936	Gm42743	33.7829	-3.66501	1.26737	-2.89181	0.00383026	0.0837677
ENSMUSG00000028059	Arhgef2	2635.32	0.866341	0.299752	2.89019	0.00385005	0.0840805
ENSMUSG00000022469	Rapgef3	405.766	-1.73331	0.600312	-2.88735	0.00388501	0.0847231
ENSMUSG00000004609	Cd33	237.376	1.2118	0.419902	2.88591	0.00390282	0.0849905
ENSMUSG00000044080	S100a1	913.318	-0.970929	0.336497	-2.8854	0.00390913	0.0850069
ENSMUSG00000017057	Il13ra1	623.813	1.06175	0.36829	2.88292	0.00394006	0.085558
ENSMUSG00000021798	Ldb3	1117.83	2.1596	0.749818	2.88016	0.0039747	0.08603
ENSMUSG00000029417	Cxcl9	35.0077	-3.06239	1.06307	-2.88069	0.003968	0.08603
ENSMUSG00000032420	Nt5e	2001.64	1.55144	0.538724	2.87985	0.00397866	0.08603
ENSMUSG00000020010	Vnn3	63.0862	-3.26851	1.1359	-2.87746	0.00400889	0.0864395
ENSMUSG00000038170	Pde4dip	4247.64	1.47286	0.511784	2.8779	0.00400326	0.0864395
ENSMUSG00000005667	Mthfd2	1581	1.33356	0.463719	2.87579	0.0040302	0.0867769
ENSMUSG00000016494	Cd34	3676.54	-0.870486	0.302878	-2.87405	0.00405242	0.0871327
ENSMUSG00000057715	A830018L16Rik	51.0614	2.21985	0.772826	2.87238	0.00407391	0.087472
ENSMUSG00000042895	Abra	92.4469	2.37232	0.826342	2.87087	0.00409344	0.0877683
ENSMUSG00000039063	Echdc3	150.696	-1.31948	0.459745	-2.87002	0.0041045	0.0878823
ENSMUSG00000092021	Gbp11	13.5299	-2.94161	1.02514	-2.86948	0.00411152	0.0879096
ENSMUSG00000044916	1700029I15Rik	30.7097	-2.13964	0.745924	-2.86843	0.00412508	0.0879539
ENSMUSG00000079197	Psme2	787.777	-0.916591	0.319513	-2.86871	0.00412151	0.0879539
ENSMUSG00000021033	Gstz1	1406.53	-1.78313	0.621774	-2.86782	0.00413314	0.0880032
ENSMUSG00000074151	Nlrc5	104.099	-1.83174	0.638918	-2.86694	0.00414464	0.0881254
ENSMUSG00000030738	Eif3c	2802.29	0.852722	0.297606	2.86527	0.00416648	0.0884393
ENSMUSG00000096727	Psmb9	151.505	-2.03223	0.709348	-2.86493	0.00417096	0.0884393
ENSMUSG00000019718	L3hypdh	287.824	-1.34179	0.468692	-2.86284	0.0041986	0.0888846
ENSMUSG00000039349	C130074G19Rik	1788.74	-1.91861	0.670266	-2.86247	0.00420357	0.0888846
ENSMUSG00000047881	Rell1	627.689	0.888199	0.310376	2.86168	0.00421396	0.0889815
ENSMUSG00000029158	Yipf7	35.148	2.99754	1.0481	2.85997	0.00423675	0.0893393
ENSMUSG00000027656	Wisp2	879.329	-2.02666	0.709001	-2.85847	0.00425687	0.0896397
ENSMUSG00000029658	Wdr95	24.3957	-2.53806	0.888052	-2.858	0.00426317	0.0896397
ENSMUSG00000045625	Pigz	62.9372	-1.9188	0.671472	-2.8576	0.00426856	0.0896397
ENSMUSG00000025190	Got1	449.068	1.35921	0.475928	2.85592	0.00429117	0.0899911
ENSMUSG00000034829	Nxnl1	22.7457	-3.2367	1.13392	-2.85444	0.00431133	0.0902902
ENSMUSG00000021226	Acot2	317.823	1.25845	0.441118	2.85286	0.00433273	0.0906145
ENSMUSG00000049588	Ccdc69	63.5063	-2.47746	0.869166	-2.85039	0.00436656	0.0911973
ENSMUSG00000074796	Slc4a11	91.6924	-2.68229	0.94129	-2.84959	0.00437763	0.0913039
ENSMUSG00000000530	Acvrl1	1187.78	-0.84572	0.29712	-2.84639	0.00442177	0.0920836
ENSMUSG00000086584	Gm12002	39.9883	-1.98128	0.696265	-2.84558	0.00443305	0.0920836
ENSMUSG00000101925	Gm28156	24.6561	-3.21813	1.13077	-2.84597	0.0044276	0.0920836
ENSMUSG00000048142	Nat8l	199.819	-1.80078	0.633044	-2.84464	0.00444611	0.0922297
ENSMUSG00000039745	Htatip2	368.07	0.989782	0.347999	2.84421	0.00445221	0.0922312
ENSMUSG00000005514	Por	2432.37	-1.3316	0.468663	-2.84127	0.00449343	0.0927087
ENSMUSG00000022206	Npr3	975.374	-3.15842	1.11149	-2.8416	0.00448881	0.0927087
ENSMUSG00000026637	Traf5	131.155	-1.39182	0.489839	-2.84139	0.00449175	0.0927087
ENSMUSG00000024049	Myom1	911.702	1.97468	0.695547	2.83904	0.00452498	0.0927348
ENSMUSG00000028108	Ecm1	4251.05	1.08179	0.380881	2.84024	0.00450799	0.0927348
ENSMUSG00000040520	Manea	479.54	0.908409	0.319949	2.83923	0.00452224	0.0927348
ENSMUSG00000040552	C3ar1	218.462	1.19247	0.419934	2.83966	0.0045161	0.0927348
ENSMUSG00000061232	H2-K1	7563.79	-1.60049	0.563615	-2.83968	0.00451585	0.0927348
ENSMUSG00000007030	Vwa7	25.1351	2.19291	0.772935	2.83712	0.00455218	0.0931676
ENSMUSG00000031785	Adgrg1	692.513	-2.13444	0.75258	-2.83616	0.00456596	0.0933249
ENSMUSG00000021665	Hexb	1053.62	1.01784	0.358941	2.83567	0.00457302	0.0933445
ENSMUSG00000097364	Gm26719	34.483	-1.9363	0.682991	-2.83503	0.00458217	0.0934067
ENSMUSG00000045868	Gvin1	12.4158	-4.79329	1.69149	-2.83377	0.00460026	0.0935637
ENSMUSG00000067653	Ankrd23	591.832	2.45593	0.866835	2.83322	0.0046082	0.0935637
ENSMUSG00000097536	2610037D02Rik	39.8876	-1.68157	0.593504	-2.83329	0.00460718	0.0935637
ENSMUSG00000090799	Klhl33	182.448	1.39901	0.493933	2.83239	0.00462009	0.0936807
ENSMUSG00000004952	Rasa4	560.321	-1.42335	0.503441	-2.82725	0.00469495	0.0950728
ENSMUSG00000038244	Mical2	565.319	1.14528	0.40535	2.82542	0.00472188	0.0952656
ENSMUSG00000046480	Scn4b	342.229	1.42632	0.504771	2.82568	0.00471805	0.0952656
ENSMUSG00000046572	Zfp518b	275.863	1.03019	0.364625	2.82533	0.00472314	0.0952656
ENSMUSG00000061815	Rufy4	28.3943	-2.54348	0.900404	-2.82482	0.00473067	0.0952919
ENSMUSG00000103932	Gm36963	90.2956	-1.27306	0.451199	-2.8215	0.00478003	0.0961597
ENSMUSG00000081487	Gm13689	32.0687	-2.06142	0.731805	-2.8169	0.00484896	0.0974183
ENSMUSG00000021032	Ngb	36.6718	-2.61648	0.929425	-2.81516	0.00487528	0.097421
ENSMUSG00000021702	Thbs4	99670.5	1.86686	0.663332	2.81437	0.00488728	0.097421
ENSMUSG00000023367	Tmem176a	995.297	-0.992863	0.352664	-2.81532	0.00487286	0.097421
ENSMUSG00000026142	Rhbdd1	523.428	0.986841	0.350545	2.81517	0.0048752	0.097421
ENSMUSG00000028197	Col24a1	121.308	2.00388	0.711521	2.81634	0.00485749	0.097421
ENSMUSG00000030319	Cand2	145.891	1.60287	0.569701	2.81354	0.0049	0.097421
ENSMUSG00000050908	Tvp23a	40.856	1.69546	0.602489	2.81409	0.0048915	0.097421
ENSMUSG00000052981	Ube2ql1	21.5352	2.45125	0.871177	2.81372	0.00489722	0.097421
ENSMUSG00000038457	Tmem255b	464.285	-1.36895	0.486957	-2.81124	0.00493512	0.0979918
ENSMUSG00000068739	Sars	2393.65	0.906679	0.322577	2.81074	0.0049428	0.0980172
ENSMUSG00000103881	Gm10748	48.1345	-1.88911	0.672315	-2.80987	0.00495623	0.0981564
ENSMUSG00000060032	H2afj	996.148	-0.933059	0.332213	-2.80861	0.00497554	0.0984116
ENSMUSG00000046873	Mbtps2	340.559	0.933209	0.332497	2.80667	0.00500567	0.0986253
ENSMUSG00000058254	Tspan7	1045.26	-0.893573	0.318363	-2.80677	0.00500403	0.0986253
ENSMUSG00000059851	Kmt5c	490.497	-0.894202	0.318569	-2.80693	0.00500154	0.0986253
ENSMUSG00000093738	AI606473	13.5465	4.21052	1.50067	2.80576	0.00501976	0.0987757
ENSMUSG00000028978	Nos3	302.89	-1.52156	0.542541	-2.80451	0.00503927	0.098962
ENSMUSG00000073422	H2-Ke6	62.7256	-1.54151	0.549691	-2.80433	0.00504215	0.098962
ENSMUSG00000104030	5330406M23Rik	61.52	-1.55809	0.555809	-2.80328	0.0050586	0.0991575
ENSMUSG00000014905	Dnajb9	810.314	0.955871	0.341215	2.80138	0.00508847	0.0994884
ENSMUSG00000036913	Trim67	63.348	-2.33138	0.832193	-2.80148	0.00508683	0.0994884
ENSMUSG00000040287	Stac3	242.665	1.97105	0.703751	2.80077	0.00509802	0.099548
ENSMUSG00000023279	Bmp15	36.2411	2.21306	0.790846	2.79835	0.00513652	0.0999243
ENSMUSG00000024727	Trpm6	35.808	2.40372	0.858963	2.7984	0.00513561	0.0999243
ENSMUSG00000070423	Olfr558	123.962	-1.6039	0.573166	-2.79832	0.00513687	0.0999243
ENSMUSG00000027327	1700037H04Rik	476.925	-1.54878	0.55375	-2.79689	0.00515967	0.100029
ENSMUSG00000039462	Col10a1	84.9369	3.48251	1.24534	2.79643	0.00516702	0.100029
ENSMUSG00000042686	Jph1	359.962	2.30822	0.825614	2.79576	0.00517777	0.100029
ENSMUSG00000056900	Usp13	372.935	1.76575	0.631477	2.79623	0.00517032	0.100029
ENSMUSG00000067279	Ppp1r3c	645.739	1.19617	0.427865	2.79568	0.00517903	0.100029
ENSMUSG00000079243	Xirp1	95.4319	1.80633	0.646149	2.79553	0.00518144	0.100029
ENSMUSG00000023019	Gpd1	4526.51	-2.10638	0.754184	-2.79292	0.00522346	0.100053
ENSMUSG00000027239	Mdk	268.195	1.0403	0.372553	2.79236	0.00523251	0.100053
ENSMUSG00000037440	Vnn1	133.05	-3.19813	1.14538	-2.79221	0.00523497	0.100053
ENSMUSG00000051486	Pcdhb11	39.3731	2.06163	0.737872	2.79403	0.00520564	0.100053
ENSMUSG00000061718	Ppp1r1b	96.2995	1.94607	0.696938	2.79231	0.0052333	0.100053
ENSMUSG00000067736	Gm10222	76.5004	-1.32073	0.472973	-2.79239	0.00523205	0.100053
ENSMUSG00000097730	Gm26588	18.722	-2.34562	0.839535	-2.79395	0.00520681	0.100053
ENSMUSG00000107865	Gm44417	70.4642	-1.40599	0.503077	-2.79477	0.00519359	0.100053
ENSMUSG00000015970	Chdh	296.398	-2.55734	0.916429	-2.79055	0.00526184	0.100441
ENSMUSG00000001657	Hoxc8	444.571	-1.19494	0.42877	-2.7869	0.00532154	0.101328
ENSMUSG00000039960	Rhou	351.276	-1.0724	0.384773	-2.7871	0.00531826	0.101328
ENSMUSG00000032263	Bckdhb	424.109	-1.71035	0.613979	-2.78568	0.00534161	0.101458
ENSMUSG00000054690	Emcn	399.734	-1.54584	0.554844	-2.78608	0.00533502	0.101458
ENSMUSG00000007035	Msh5	44.9998	-1.68503	0.605077	-2.78482	0.00535571	0.101461
ENSMUSG00000022982	Sod1	2308.47	-0.904266	0.324754	-2.78446	0.00536169	0.101461
ENSMUSG00000051243	Islr2	142.609	1.2006	0.431064	2.78519	0.00534967	0.101461
ENSMUSG00000030630	Fah	478.509	-1.708	0.613517	-2.78395	0.00537014	0.101462
ENSMUSG00000056144	Trim34a	61.7669	-2.17622	0.781785	-2.78366	0.00537496	0.101462
ENSMUSG00000028664	Ephb2	283.097	1.46471	0.526522	2.78186	0.00540491	0.101901
ENSMUSG00000091089	NA	117.412	1.44957	0.521531	2.77945	0.00544507	0.102478
ENSMUSG00000107362	Gm40309	38.3298	-1.74384	0.627455	-2.77922	0.0054489	0.102478
ENSMUSG00000022652	Morc1	17.1938	2.78698	1.003	2.77864	0.00545872	0.102482
ENSMUSG00000031586	Rbpms	376.269	-1.5731	0.566186	-2.77841	0.0054625	0.102482
ENSMUSG00000009378	Slc16a12	58.766	-2.8816	1.03746	-2.77757	0.0054767	0.102623
ENSMUSG00000001739	Cldn15	112.654	-2.62748	0.946341	-2.77647	0.00549534	0.102826
ENSMUSG00000041577	Prelp	14537.5	1.33466	0.480762	2.77613	0.00550096	0.102826
ENSMUSG00000024190	Dusp1	1877.85	1.49124	0.537259	2.77565	0.00550918	0.102854
ENSMUSG00000028654	Mycl	58.7675	-3.09141	1.11433	-2.77423	0.00553331	0.103178
ENSMUSG00000078853	Igtp	149.667	-1.33605	0.481776	-2.77318	0.00555113	0.103303
ENSMUSG00000105504	Gbp5	110.155	-1.8132	0.653867	-2.77304	0.00555348	0.103303
ENSMUSG00000031760	Mt3	542.233	-2.5244	0.910485	-2.77259	0.00556121	0.103321
ENSMUSG00000032076	Cadm1	294.135	-1.43921	0.519255	-2.77168	0.00557674	0.103484
ENSMUSG00000064364	mt-Th	43.3875	-1.62169	0.585796	-2.76836	0.00563386	0.104417
ENSMUSG00000035187	Nkx6-1	19.2278	2.47371	0.893871	2.76742	0.00565024	0.104594
ENSMUSG00000035258	Abi3bp	23896.7	1.52026	0.549774	2.76525	0.00568797	0.105166
ENSMUSG00000027470	Mylk2	570.17	2.53863	0.918831	2.76289	0.00572927	0.105801
ENSMUSG00000050052	Tdrp	178.402	-2.36825	0.858586	-2.75831	0.00581002	0.107066
ENSMUSG00000079465	Col4a3	100.357	-2.0586	0.746352	-2.75822	0.00581172	0.107066
ENSMUSG00000015568	Lpl	18054.3	-2.03387	0.737794	-2.75669	0.00583905	0.107311
ENSMUSG00000029641	Rasl11a	57.095	-2.15369	0.78118	-2.75697	0.00583399	0.107311
ENSMUSG00000000392	Fap	1413.73	1.00399	0.364352	2.75556	0.00585921	0.107552
ENSMUSG00000027087	Itgav	1723.11	1.05008	0.381216	2.75457	0.00587696	0.107749
ENSMUSG00000000183	Fgf6	17.2188	4.49998	1.63469	2.7528	0.00590874	0.108102
ENSMUSG00000039886	Tmem120a	1003.49	-1.64528	0.597692	-2.75272	0.00591032	0.108102
ENSMUSG00000043587	Pxylp1	317.876	2.05037	0.745167	2.75156	0.00593125	0.108355
ENSMUSG00000068747	Sort1	1478.27	-1.94864	0.708896	-2.74884	0.00598059	0.109126
ENSMUSG00000110079	Gm45292	15.6447	-2.58896	0.942324	-2.74742	0.00600661	0.10947
ENSMUSG00000025934	Gsta3	20.6008	-2.65739	0.967496	-2.74667	0.00602036	0.109591
ENSMUSG00000026833	Olfm1	681.664	0.930885	0.33897	2.74621	0.00602875	0.109613
ENSMUSG00000024143	Rhoq	2750.02	0.835039	0.304488	2.74243	0.00609858	0.110751
ENSMUSG00000039099	Wdr93	26.0334	-3.1556	1.15098	-2.74165	0.00611315	0.110884
ENSMUSG00000033446	Lpar6	295.335	-1.60758	0.586569	-2.74066	0.00613165	0.110888
ENSMUSG00000033487	Fndc3a	857.672	0.84205	0.307352	2.7397	0.00614959	0.110888
ENSMUSG00000039891	Txlnb	256.75	2.49294	0.90979	2.74013	0.00614149	0.110888
ENSMUSG00000097583	6430590A07Rik	30.2309	-1.83796	0.670823	-2.73986	0.00614662	0.110888
ENSMUSG00000097820	E530011L22Rik	183.475	-1.59666	0.58275	-2.73988	0.00614622	0.110888
ENSMUSG00000015745	Plekho1	414.814	-0.972495	0.355099	-2.73866	0.00616899	0.110977
ENSMUSG00000040466	Blvrb	458.27	-0.944977	0.345014	-2.73895	0.00616354	0.110977
ENSMUSG00000026308	Klhl30	113.924	1.27443	0.465811	2.73594	0.00622021	0.111767
ENSMUSG00000058975	Kcnc1	189.04	1.81218	0.662805	2.73411	0.00625489	0.112258
ENSMUSG00000029467	Atp2a2	4047.51	0.863356	0.31585	2.73344	0.00626767	0.112356
ENSMUSG00000053746	Ptrh1	85.2906	1.42031	0.519708	2.7329	0.00627786	0.112407
ENSMUSG00000027797	Dclk1	678.24	1.23151	0.450962	2.73084	0.00631732	0.112981
ENSMUSG00000033491	Prss35	114.18	1.73662	0.636312	2.72919	0.00634898	0.113415
ENSMUSG00000023013	Aqp2	87.0629	-1.81223	0.66477	-2.72611	0.00640862	0.114347
ENSMUSG00000052085	Dock8	1331.22	1.2594	0.46234	2.72398	0.00645012	0.114953
ENSMUSG00000087480	Gm15910	51.5998	-1.47091	0.540228	-2.72275	0.00647406	0.115246
ENSMUSG00000005087	Cd44	1892.35	1.23371	0.453392	2.72107	0.00650701	0.115564
ENSMUSG00000044172	Ptx4	743.395	1.54242	0.566777	2.72138	0.00650101	0.115564
ENSMUSG00000055027	Smyd1	421.093	2.69207	0.989719	2.72003	0.00652759	0.115795
ENSMUSG00000022216	Psme1	679.912	-1.07335	0.394879	-2.71817	0.00656444	0.11598
ENSMUSG00000032311	Nrg4	124.032	-2.50336	0.920993	-2.71811	0.00656555	0.11598
ENSMUSG00000032786	Alas1	1114.76	-1.56087	0.574083	-2.71889	0.00655021	0.11598
ENSMUSG00000047407	Tgif1	301.203	0.950998	0.349892	2.71797	0.00656831	0.11598
ENSMUSG00000020644	Id2	1039.56	1.16997	0.430711	2.71637	0.00660018	0.116274
ENSMUSG00000030650	Tmc5	13.2454	-4.89316	1.80117	-2.71665	0.00659461	0.116274
ENSMUSG00000026864	Hspa5	8517.48	1.05168	0.387281	2.71554	0.00661687	0.116434
ENSMUSG00000021703	Serinc5	1382.37	1.15506	0.425526	2.71443	0.00663893	0.116688
ENSMUSG00000033268	Duox1	106.802	1.24979	0.460627	2.71323	0.00666308	0.116978
ENSMUSG00000026890	Lhx6	158.865	-1.79659	0.662779	-2.71069	0.0067143	0.117742
ENSMUSG00000015501	Hivep2	2642.96	1.0463	0.38645	2.70746	0.00678	0.118487
ENSMUSG00000020774	Aspa	72.1823	-2.2769	0.840954	-2.70752	0.00677887	0.118487
ENSMUSG00000078695	Cisd3	235.91	-1.2693	0.468755	-2.70781	0.0067728	0.118487
ENSMUSG00000064215	Ifi27	2698.67	-1.00974	0.37301	-2.707	0.00678949	0.118518
ENSMUSG00000064367	mt-Nd5	70312.5	-0.965285	0.356639	-2.70661	0.0067973	0.118519
ENSMUSG00000005057	Sh2b2	204.918	-2.34422	0.867083	-2.70357	0.00685997	0.119476
ENSMUSG00000025348	Itga7	1444.41	-1.58206	0.585341	-2.7028	0.00687576	0.119615
ENSMUSG00000006800	Sulf2	4146.02	1.2043	0.445891	2.70088	0.0069157	0.119765
ENSMUSG00000025271	Pfkfb1	141.246	-2.3121	0.856051	-2.70089	0.00691547	0.119765
ENSMUSG00000025701	Alox5	162.436	1.17757	0.435959	2.7011	0.00691115	0.119765
ENSMUSG00000049521	Cdc42ep1	821.546	-0.964906	0.357242	-2.70099	0.00691344	0.119765
ENSMUSG00000055737	Ghr	4111.03	-1.94168	0.719235	-2.69964	0.00694144	0.120075
ENSMUSG00000028525	Pde4b	485.08	0.893628	0.33116	2.69848	0.00696576	0.120297
ENSMUSG00000048218	Amigo2	177.09	-1.81493	0.672626	-2.69827	0.00696999	0.120297
ENSMUSG00000005611	Mrvi1	180.299	-1.62946	0.604875	-2.69388	0.00706248	0.121756
ENSMUSG00000028341	Nr4a3	174.948	1.45792	0.541553	2.69211	0.00710007	0.122267
ENSMUSG00000041697	Cox6a1	2999.76	-0.798927	0.296887	-2.69101	0.00712361	0.122534
ENSMUSG00000038132	Rbm24	106.707	2.01299	0.748266	2.6902	0.00714082	0.122692
ENSMUSG00000021061	Sptb	359.497	1.67331	0.624433	2.67973	0.00736816	0.126295
ENSMUSG00000036832	Lpar3	44.7203	1.90609	0.711485	2.67903	0.00738351	0.126295
ENSMUSG00000038679	Trps1	2276.25	1.31271	0.48992	2.67943	0.00737468	0.126295
ENSMUSG00000106320	Gm42992	32.3967	-1.73116	0.646174	-2.67909	0.00738224	0.126295
ENSMUSG00000104235	Gm37589	54.0858	-1.42916	0.5344	-2.67433	0.00748785	0.127937
ENSMUSG00000022836	Mylk	3922	-0.943856	0.353316	-2.67142	0.00755301	0.128334
ENSMUSG00000028518	Prkaa2	406.11	1.2896	0.482709	2.6716	0.00754915	0.128334
ENSMUSG00000029245	Epha5	372.203	1.15004	0.430316	2.67254	0.00752787	0.128334
ENSMUSG00000032532	Cck	37.5739	-2.08173	0.779055	-2.67211	0.00753749	0.128334
ENSMUSG00000081564	Gm13717	26.9808	-1.87764	0.702852	-2.67147	0.00755207	0.128334
ENSMUSG00000031377	Bmx	47.7556	-1.82422	0.683064	-2.67065	0.00757052	0.128489
ENSMUSG00000010608	Rbm25	2731.78	-0.86161	0.322833	-2.66891	0.00760982	0.129013
ENSMUSG00000024098	Twsg1	2890.07	1.14934	0.430936	2.66708	0.00765142	0.129575
ENSMUSG00000020583	Matn3	210.105	1.48228	0.556336	2.66436	0.00771346	0.130476
ENSMUSG00000024713	Pcsk5	921.419	1.29537	0.486248	2.664	0.00772169	0.130476
ENSMUSG00000020805	Slc13a5	16.8418	2.62729	0.986711	2.66267	0.0077523	0.130849
ENSMUSG00000025216	Lbx1	68.5117	2.13225	0.800955	2.66214	0.00776459	0.130912
ENSMUSG00000024327	Slc39a7	902.441	0.954344	0.358619	2.66117	0.00778702	0.131002
ENSMUSG00000090709	Gm17173	13.7906	3.64413	1.36924	2.66143	0.00778089	0.131002
ENSMUSG00000004610	Etfb	412.646	-1.11881	0.420694	-2.65944	0.00782707	0.131243
ENSMUSG00000090019	Gimap1	152.355	-1.68825	0.63468	-2.66	0.00781416	0.131243
ENSMUSG00000111840	Gm48832	59.6385	-3.43171	1.29022	-2.65978	0.00781913	0.131243
ENSMUSG00000041773	Enc1	1208.83	1.30262	0.489916	2.65886	0.00784058	0.131325
ENSMUSG00000102869	2900097C17Rik	749.343	1.02739	0.38653	2.65799	0.00786085	0.131521
ENSMUSG00000023809	Rps6ka2	333.738	0.92096	0.34663	2.6569	0.00788634	0.131803
ENSMUSG00000030525	Chrna7	47.2664	1.83392	0.690406	2.65629	0.00790065	0.131854
ENSMUSG00000038721	Hoxb7	57.683	-1.94108	0.730956	-2.65554	0.00791813	0.131854
ENSMUSG00000075706	Gpx4	2646.81	-0.883882	0.332804	-2.65587	0.00791052	0.131854
ENSMUSG00000090086	AI480526	178.926	-1.03437	0.389549	-2.6553	0.00792383	0.131854
ENSMUSG00000026525	Opn3	152.171	-2.18887	0.824611	-2.65443	0.00794428	0.132051
ENSMUSG00000016918	Sulf1	4265.83	1.40516	0.529513	2.65369	0.00796177	0.132116
ENSMUSG00000057963	Itpk1	218.354	-1.30435	0.491551	-2.65353	0.00796545	0.132116
ENSMUSG00000087413	Gm11266	59.8087	-1.38178	0.520833	-2.65302	0.00797752	0.132173
ENSMUSG00000007097	Atp1a2	5446.74	-1.23424	0.465544	-2.65117	0.00802127	0.132557
ENSMUSG00000025608	Podxl	1379.69	-1.27508	0.480989	-2.65095	0.00802666	0.132557
ENSMUSG00000028927	Padi2	180.593	1.65258	0.623379	2.651	0.00802532	0.132557
ENSMUSG00000032735	Ablim3	574.077	-2.0062	0.75719	-2.64953	0.00806042	0.132971
ENSMUSG00000031906	Smpd3	298.873	1.50456	0.567981	2.64897	0.00807375	0.133047
ENSMUSG00000086859	Snhg20	172.164	-0.988583	0.373456	-2.64712	0.00811805	0.133634
ENSMUSG00000064372	mt-Tp	969.761	-1.11558	0.421828	-2.64464	0.0081779	0.134474
ENSMUSG00000032487	Ptgs2	64.6988	1.76452	0.667841	2.64213	0.00823859	0.135327
ENSMUSG00000038119	Cdon	3701.72	1.18453	0.4486	2.64051	0.00827811	0.13583
ENSMUSG00000030826	Bcat2	1060.61	-1.68257	0.637362	-2.63989	0.00829322	0.135932
ENSMUSG00000027784	Ppm1l	1012.49	1.27997	0.485242	2.6378	0.00834452	0.136627
ENSMUSG00000022842	Ece2	187.19	1.17204	0.444756	2.63524	0.00840787	0.137224
ENSMUSG00000032648	Pygm	4403.4	2.39115	0.907303	2.63545	0.0084025	0.137224
ENSMUSG00000033717	Adra2a	226.918	-1.75407	0.66558	-2.6354	0.0084038	0.137224
ENSMUSG00000049295	Zfp219	637.309	-0.858989	0.326118	-2.63398	0.00843902	0.137579
ENSMUSG00000060181	Slc35e3	388.362	0.904858	0.343577	2.63364	0.00844758	0.137579
ENSMUSG00000022220	Adcy4	421.444	-1.48695	0.565139	-2.63112	0.00851042	0.13792
ENSMUSG00000037722	Gnpnat1	416.035	0.953304	0.36227	2.63148	0.00850145	0.13792
ENSMUSG00000042429	Adora1	442.034	-1.50475	0.571783	-2.63168	0.0084964	0.13792
ENSMUSG00000056569	Mpz	1010.09	-1.23453	0.469211	-2.63107	0.00851158	0.13792
ENSMUSG00000079168	Cd209g	71.8715	-2.8788	1.09419	-2.63099	0.00851361	0.13792
ENSMUSG00000056938	Acbd4	988.297	-1.0188	0.387288	-2.6306	0.00852335	0.137932
ENSMUSG00000020681	Ace	2873.74	-0.912918	0.34734	-2.62832	0.00858089	0.138717
ENSMUSG00000070495	Ctcfl	28.2382	-3.27871	1.2481	-2.62696	0.00861514	0.138977
ENSMUSG00000108494	Gm45203	30.3073	-2.29012	0.871668	-2.62729	0.00860687	0.138977
ENSMUSG00000022462	Slc38a2	3146.38	1.01024	0.38467	2.62625	0.00863318	0.139121
ENSMUSG00000024924	Vldlr	849.714	1.62279	0.61817	2.62515	0.00866107	0.139424
ENSMUSG00000029153	Ociad2	154.233	1.81852	0.692973	2.62423	0.00868458	0.139656
ENSMUSG00000009471	Myod1	17.0572	3.7973	1.44768	2.62303	0.00871504	0.139999
ENSMUSG00000029621	Arpc1a	1333.42	-0.823351	0.314011	-2.62205	0.00874024	0.140256
ENSMUSG00000042532	Golga7b	33.6319	1.79188	0.683924	2.62	0.00879295	0.140954
ENSMUSG00000014791	Elmo3	135.27	-1.06135	0.405776	-2.6156	0.00890697	0.142484
ENSMUSG00000060913	Trim55	49.4759	3.52958	1.3493	2.61586	0.00890035	0.142484
ENSMUSG00000031375	Bgn	58255.9	1.63279	0.624696	2.61373	0.008956	0.142794
ENSMUSG00000032401	Lctl	73.9505	-2.6138	1.00014	-2.61344	0.00896367	0.142794
ENSMUSG00000040037	Negr1	106.385	-1.1961	0.45749	-2.61449	0.00893602	0.142794
ENSMUSG00000102059	Gm20257	92.6333	-1.25624	0.480636	-2.61371	0.0089566	0.142794
ENSMUSG00000021646	Mccc2	390.967	-1.92899	0.738436	-2.61227	0.00899437	0.143134
ENSMUSG00000086058	Unc45bos	14.9495	-2.72531	1.04349	-2.61172	0.00900883	0.143215
ENSMUSG00000023571	C1qtnf12	267.6	-1.59963	0.612615	-2.61114	0.00902401	0.143308
ENSMUSG00000036745	Ttll7	223.785	0.952968	0.365218	2.60931	0.00907238	0.143778
ENSMUSG00000070407	Hs3st3b1	133.493	2.1369	0.818907	2.60946	0.00906853	0.143778
ENSMUSG00000002550	Uck1	721.076	-1.13636	0.435695	-2.60816	0.00910296	0.143964
ENSMUSG00000054293	P2ry10b	241.591	1.14668	0.439622	2.60834	0.00909824	0.143964
ENSMUSG00000027332	Ivd	995.459	-1.45329	0.557375	-2.60738	0.0091238	0.144145
ENSMUSG00000090559	Gm17137	18.4127	-2.28844	0.877995	-2.60644	0.00914886	0.144392
ENSMUSG00000031351	Zfp185	1052.3	1.13199	0.434753	2.60376	0.00922069	0.144631
ENSMUSG00000051515	Fam181b	53.2633	-1.74478	0.670029	-2.60403	0.00921337	0.144631
ENSMUSG00000051669	AU021092	63.5893	-1.62957	0.625676	-2.60449	0.00920101	0.144631
ENSMUSG00000052125	F730043M19Rik	35.9132	-1.9374	0.743999	-2.60404	0.00921333	0.144631
ENSMUSG00000059027	9630013D21Rik	66.4834	-1.66227	0.638061	-2.6052	0.00918218	0.144631
ENSMUSG00000103364	Gm38157	41.3613	-1.6614	0.637805	-2.60488	0.00919076	0.144631
ENSMUSG00000021903	Galnt15	843.42	-1.59864	0.614096	-2.60324	0.0092348	0.144704
ENSMUSG00000011382	Dhdh	369.74	-2.04986	0.78766	-2.60247	0.00925548	0.14486
ENSMUSG00000054555	Adam12	1455.58	1.52817	0.587269	2.60217	0.00926371	0.14486
ENSMUSG00000040435	Ppp1r15a	400.744	0.928447	0.357519	2.59692	0.00940647	0.146942
ENSMUSG00000027222	Pex16	372.564	-1.39391	0.537098	-2.59526	0.00945182	0.14735
ENSMUSG00000041313	Slc7a1	1352.88	1.23306	0.47508	2.59548	0.0094459	0.14735
ENSMUSG00000018378	Cuedc1	3945.15	-1.33964	0.517038	-2.59099	0.00956994	0.148014
ENSMUSG00000022847	Thpo	74.8093	-1.32166	0.510067	-2.59115	0.00956549	0.148014
ENSMUSG00000027510	Rbm38	152.424	1.20626	0.465373	2.59202	0.00954155	0.148014
ENSMUSG00000032523	Hhatl	155.655	2.81583	1.0862	2.59238	0.00953154	0.148014
ENSMUSG00000034684	Sema3f	845.525	-0.813467	0.313964	-2.59095	0.00957108	0.148014
ENSMUSG00000035142	Nubpl	58.4512	-1.48512	0.573199	-2.59093	0.00957175	0.148014
ENSMUSG00000049313	Sorl1	916.895	0.828202	0.319619	2.59121	0.00956378	0.148014
ENSMUSG00000102331	Gm19938	40.5081	-1.9123	0.737533	-2.59284	0.00951883	0.148014
ENSMUSG00000022369	Mtbp	120.082	1.10489	0.426507	2.59055	0.0095824	0.148029
ENSMUSG00000022623	Shank3	1316.23	-1.33429	0.515205	-2.58983	0.00960238	0.148188
ENSMUSG00000044092	C130050O18Rik	234.3	1.23029	0.475514	2.58727	0.00967385	0.149141
ENSMUSG00000002804	Nudt14	80.7476	-1.2091	0.467665	-2.5854	0.00972658	0.149546
ENSMUSG00000019590	Cyb561	1052.24	-1.37559	0.532082	-2.5853	0.00972941	0.149546
ENSMUSG00000033006	Sox10	102.527	-1.14044	0.441088	-2.58552	0.00972336	0.149546
ENSMUSG00000020190	Mknk2	2913.3	-1.49061	0.576849	-2.58406	0.00976442	0.149933
ENSMUSG00000027364	Usp50	20.1309	-2.42854	0.940072	-2.58336	0.00978437	0.150062
ENSMUSG00000051550	Zfp579	291.22	-0.997015	0.38598	-2.58307	0.00979241	0.150062
ENSMUSG00000074622	Mafb	1112.31	0.779223	0.301772	2.58216	0.00981843	0.15031
ENSMUSG00000026938	Fcna	94.9096	-1.48321	0.574662	-2.58101	0.00985116	0.150605
ENSMUSG00000031613	Hpgd	698.084	-1.27915	0.495641	-2.58079	0.00985736	0.150605
ENSMUSG00000000627	Sema4f	89.3321	1.63547	0.633819	2.58033	0.00987046	0.150638
ENSMUSG00000030557	Mef2a	2341.1	0.74617	0.28921	2.58003	0.00987919	0.150638
ENSMUSG00000040283	Btnl9	433.257	-1.98639	0.770236	-2.57893	0.00991059	0.150733
ENSMUSG00000064342	mt-Ti	26.8798	-1.87602	0.727483	-2.57878	0.00991494	0.150733
ENSMUSG00000111468	5033425B01Rik	14.367	-3.95493	1.53341	-2.57917	0.00990373	0.150733
ENSMUSG00000015468	Notch4	431.194	-1.65467	0.641759	-2.57834	0.0099277	0.150777
ENSMUSG00000000317	Bcl6b	231.199	-1.45672	0.565131	-2.57767	0.00994686	0.150918
ENSMUSG00000010609	Psen2	503.697	-1.04953	0.407405	-2.57614	0.00999115	0.15129
ENSMUSG00000022562	Oplah	862.774	-0.841397	0.326581	-2.57638	0.0099841	0.15129
ENSMUSG00000037887	Dusp8	723.774	1.03617	0.402736	2.57283	0.0100872	0.152593
ENSMUSG00000021200	Asb2	177.494	1.4928	0.580425	2.57191	0.0101138	0.152815
ENSMUSG00000024132	Eci1	709.686	-1.09164	0.424517	-2.57149	0.0101261	0.152815
ENSMUSG00000050578	Mmp13	61.5883	2.53588	0.986225	2.5713	0.0101318	0.152815
ENSMUSG00000071379	Hpcal1	397.479	-0.840806	0.327096	-2.57052	0.0101546	0.153009
ENSMUSG00000104735	C130075A20Rik	40.1124	-1.60584	0.62513	-2.56881	0.0102048	0.153478
ENSMUSG00000108486	Gm44836	31.9864	-1.69342	0.659231	-2.56878	0.0102058	0.153478
ENSMUSG00000103867	9630010A21Rik	23.8184	-1.95053	0.759534	-2.56806	0.010227	0.153646
ENSMUSG00000034911	Ushbp1	689.372	-1.73311	0.675192	-2.56684	0.0102629	0.154034
ENSMUSG00000001891	Ugp2	1270.72	0.77541	0.302357	2.56455	0.010331	0.154904
ENSMUSG00000024544	Ldlrad4	759.163	1.07927	0.420994	2.56362	0.0103587	0.155168
ENSMUSG00000066516	Klk1b21	19.0082	-3.98639	1.55588	-2.56215	0.0104027	0.155675
ENSMUSG00000002808	Epdr1	614.241	1.57503	0.614911	2.5614	0.0104252	0.155833
ENSMUSG00000049115	Agtr1a	223.727	-1.11912	0.436967	-2.56111	0.0104337	0.155833
ENSMUSG00000001943	Vsig2	60.8224	-2.10791	0.823283	-2.56037	0.0104561	0.156016
ENSMUSG00000027463	Slc52a3	70.8864	-2.07923	0.812725	-2.55834	0.0105172	0.156775
ENSMUSG00000011263	Exoc3l2	305.824	-1.498	0.585919	-2.55667	0.0105681	0.15738
ENSMUSG00000030247	Kcnj8	252.189	-1.76585	0.690804	-2.55622	0.0105816	0.157428
ENSMUSG00000060002	Chpt1	1804	-1.579	0.617815	-2.55578	0.010595	0.157475
ENSMUSG00000033213	AA467197	25.6122	2.02517	0.792983	2.55387	0.0106534	0.15773
ENSMUSG00000037922	Bank1	28.4876	-1.77853	0.696206	-2.55461	0.0106307	0.15773
ENSMUSG00000069874	Irgm2	242.613	-1.1161	0.436926	-2.55444	0.0106359	0.15773
ENSMUSG00000107780	9530013L04Rik	30.9637	-2.32319	0.909567	-2.55417	0.0106442	0.15773
ENSMUSG00000024027	Glp1r	27.6313	2.37811	0.932068	2.55144	0.010728	0.158098
ENSMUSG00000028524	Sgip1	163.9	-1.32851	0.520702	-2.55139	0.0107295	0.158098
ENSMUSG00000037625	Cldn11	54.8651	1.37362	0.538367	2.55146	0.0107272	0.158098
ENSMUSG00000039145	Camk1d	871.065	1.35734	0.532004	2.55138	0.0107299	0.158098
ENSMUSG00000053279	Aldh1a1	789.403	0.924224	0.362083	2.55252	0.0106947	0.158098
ENSMUSG00000047528	Als2cr12	36.0961	-2.63372	1.03304	-2.54948	0.0107883	0.158806
ENSMUSG00000090958	Lrrc32	345.848	-1.221	0.479095	-2.54855	0.0108172	0.158926
ENSMUSG00000111158	Gm48741	25.9387	-1.9425	0.762125	-2.5488	0.0108095	0.158926
ENSMUSG00000049687	Fam109b	209.879	1.04583	0.410501	2.54769	0.010844	0.159166
ENSMUSG00000041707	1810011H11Rik	43.3132	-2.38192	0.935077	-2.5473	0.010856	0.159191
ENSMUSG00000111531	Gm32688	25.6809	-1.86481	0.73218	-2.54693	0.0108675	0.159206
ENSMUSG00000036854	Hspb6	568.562	1.22425	0.480828	2.54613	0.0108924	0.159418
ENSMUSG00000031596	Slc7a2	1063.33	0.985186	0.387467	2.54263	0.0110021	0.160457
ENSMUSG00000037348	Paqr7	149.529	-1.00324	0.394504	-2.54305	0.010989	0.160457
ENSMUSG00000050271	Prag1	245.637	-1.01137	0.397668	-2.54326	0.0109824	0.160457
ENSMUSG00000056553	Ptprn2	27.2145	1.80291	0.709101	2.54253	0.0110053	0.160457
ENSMUSG00000034755	Pcdh11x	21.6558	2.17142	0.854341	2.54164	0.0110335	0.160716
ENSMUSG00000045294	Insig1	1090.54	-1.3252	0.5215	-2.54114	0.0110492	0.160791
ENSMUSG00000078486	Perm1	72.4676	2.08207	0.820623	2.53718	0.0111749	0.162466
ENSMUSG00000057614	Gnai1	997.915	-1.60063	0.631021	-2.53657	0.0111943	0.162593
ENSMUSG00000026879	Gsn	46450.7	-1.05217	0.415004	-2.53533	0.0112341	0.163017
ENSMUSG00000034810	Scn7a	505.214	-1.92637	0.760959	-2.5315	0.0113576	0.164653
ENSMUSG00000106671	Gm42900	38.1453	-1.89742	0.750445	-2.5284	0.0114585	0.165958
ENSMUSG00000102297	5730585A16Rik	21.4706	-2.02168	0.799915	-2.52736	0.0114923	0.166291
ENSMUSG00000020169	Best3	19.0301	2.33382	0.924063	2.52561	0.0115498	0.166964
ENSMUSG00000027994	Mcub	169.098	0.952626	0.377459	2.52379	0.0116097	0.167673
ENSMUSG00000020598	Nrcam	141.579	1.22904	0.487226	2.52252	0.0116518	0.167688
ENSMUSG00000023169	Slc38a1	1005.59	1.4747	0.584479	2.5231	0.0116324	0.167688
ENSMUSG00000043671	Dpy19l3	235.373	1.11312	0.441288	2.52243	0.0116546	0.167688
ENSMUSG00000061882	Ccdc62	57.7265	-1.30461	0.517186	-2.52251	0.0116521	0.167688
ENSMUSG00000021213	Akr1c13	21.0985	-2.44594	0.970121	-2.52127	0.0116933	0.168087
ENSMUSG00000040152	Thbs1	19317.4	1.56503	0.620871	2.5207	0.0117121	0.1682
ENSMUSG00000020900	Myh10	1098.15	0.803276	0.318731	2.52023	0.0117277	0.168266
ENSMUSG00000043518	Rai2	157.649	-1.43731	0.570402	-2.51981	0.0117418	0.16831
ENSMUSG00000025510	Cd151	2076.56	-1.07576	0.426986	-2.51941	0.0117551	0.168343
ENSMUSG00000104951	Gm43413	33.8777	-1.86571	0.740814	-2.51845	0.0117871	0.168644
ENSMUSG00000020577	Tspan13	575.175	-1.42813	0.567408	-2.51693	0.0118382	0.169217
ENSMUSG00000026721	Rabgap1l	1426.66	1.18156	0.469742	2.51534	0.0118916	0.169641
ENSMUSG00000034171	Faah	89.1473	1.31953	0.524775	2.51447	0.011921	0.169641
ENSMUSG00000053898	Ech1	1276.99	-1.38268	0.549903	-2.51441	0.0119233	0.169641
ENSMUSG00000076609	Igkc	44.8559	-2.55806	1.01728	-2.5146	0.0119168	0.169641
ENSMUSG00000107234	Gm43371	15.6333	-2.94285	1.17037	-2.51446	0.0119215	0.169641
ENSMUSG00000037341	Slc9a7	22.9684	1.94933	0.775835	2.51256	0.0119858	0.170373
ENSMUSG00000040133	Gpr176	92.6051	2.24185	0.892605	2.51158	0.0120192	0.170591
ENSMUSG00000048416	Mlf1	179.619	1.96943	0.784177	2.51145	0.0120235	0.170591
ENSMUSG00000002108	Nr1h3	360.103	-1.86605	0.743276	-2.51057	0.0120536	0.170859
ENSMUSG00000022656	Nectin3	479.844	0.908644	0.362043	2.50977	0.0120811	0.171091
ENSMUSG00000064246	Chil1	185.431	1.21255	0.483274	2.50902	0.0121066	0.171293
ENSMUSG00000015085	Entpd2	517.564	-1.04533	0.416912	-2.50731	0.0121653	0.171965
ENSMUSG00000044037	Als2cl	595.062	-0.817513	0.326122	-2.50677	0.012184	0.172071
ENSMUSG00000091264	Smim13	492.586	0.807296	0.322113	2.50625	0.012202	0.172166
ENSMUSG00000070348	Ccnd1	957.275	-1.14702	0.457908	-2.5049	0.0122485	0.172663
ENSMUSG00000097051	Gm26836	37.1429	-1.61418	0.644846	-2.50321	0.0123072	0.173331
ENSMUSG00000020532	Acaca	1461.56	-1.38242	0.55262	-2.50158	0.0123639	0.173484
ENSMUSG00000032578	Cish	168.275	-1.96065	0.783859	-2.50128	0.0123747	0.173484
ENSMUSG00000063060	Sox7	155.668	-1.82578	0.729847	-2.5016	0.0123635	0.173484
ENSMUSG00000082286	Pisd-ps1	87.3497	-1.12821	0.451002	-2.50157	0.0123644	0.173484
ENSMUSG00000097039	Pvt1	65.1866	1.28918	0.51533	2.50165	0.0123616	0.173484
ENSMUSG00000021495	Fam193b	1029.79	-0.813498	0.325413	-2.4999	0.012423	0.173657
ENSMUSG00000031849	Comp	80266.2	1.82575	0.730228	2.50025	0.0124106	0.173657
ENSMUSG00000038375	Trp53inp2	4590.37	-1.19678	0.478785	-2.49963	0.0124325	0.173657
ENSMUSG00000101856	1700096K18Rik	68.5449	-1.27683	0.510713	-2.50009	0.0124163	0.173657
ENSMUSG00000010086	Rnf112	492.858	-1.44873	0.579934	-2.49809	0.0124864	0.174252
ENSMUSG00000091898	Tnnc1	46.8328	-2.36904	0.948761	-2.49698	0.0125255	0.174638
ENSMUSG00000021294	Kif26a	394.94	-1.36406	0.546501	-2.49599	0.0125604	0.174966
ENSMUSG00000028033	Kcnq5	63.2943	1.67259	0.670763	2.49356	0.0126468	0.17559
ENSMUSG00000031871	Cdh5	2488.37	-1.70082	0.681894	-2.49426	0.0126219	0.17559
ENSMUSG00000051980	Casr	193.375	2.01822	0.809409	2.49344	0.0126511	0.17559
ENSMUSG00000063268	Parp10	201.98	-1.44398	0.579003	-2.49391	0.0126345	0.17559
ENSMUSG00000020218	Wif1	5444.41	1.96293	0.787569	2.49239	0.0126888	0.175954
ENSMUSG00000020077	Srgn	344.78	-1.20679	0.484423	-2.49119	0.0127317	0.176389
ENSMUSG00000037138	Aff3	1169.74	1.32621	0.532512	2.49047	0.0127573	0.176458
ENSMUSG00000042099	Kank3	669.154	-1.58051	0.63464	-2.49041	0.0127597	0.176458
ENSMUSG00000052921	Arhgef15	540.613	-1.54051	0.619013	-2.48865	0.0128229	0.177011
ENSMUSG00000096984	Gm26523	41.1247	-1.67751	0.673981	-2.48896	0.0128116	0.177011
ENSMUSG00000002625	Akap8l	650.804	-0.813223	0.326904	-2.48765	0.0128591	0.177338
ENSMUSG00000024587	Nars	2459.18	0.845844	0.340058	2.48735	0.0128697	0.177338
ENSMUSG00000031442	Mcf2l	493.096	-1.56605	0.63005	-2.48559	0.0129336	0.177891
ENSMUSG00000035104	Eva1a	35.0648	-1.57591	0.633978	-2.48574	0.0129281	0.177891
ENSMUSG00000104713	Gbp6	48.6633	-1.77965	0.716073	-2.48529	0.0129447	0.177891
ENSMUSG00000039942	Ptger4	192.867	0.989098	0.39848	2.48218	0.0130582	0.179145
ENSMUSG00000058831	Opn1sw	13.7832	-2.5446	1.02516	-2.48215	0.0130593	0.179145
ENSMUSG00000107529	Gm44291	23.4492	-2.17574	0.876882	-2.48123	0.0130931	0.179448
ENSMUSG00000036019	Tmtc2	233.386	0.87704	0.353696	2.47965	0.0131513	0.180083
ENSMUSG00000047434	Xxylt1	389.08	0.92897	0.374744	2.47894	0.0131773	0.180278
ENSMUSG00000020131	Pcsk4	70.5221	-1.28126	0.517115	-2.47772	0.0132226	0.180736
ENSMUSG00000027642	Rpn2	4990.91	0.836847	0.337853	2.47696	0.0132508	0.180798
ENSMUSG00000031886	Ces2e	14.4628	-2.31451	0.934331	-2.47719	0.0132422	0.180798
ENSMUSG00000005803	Sqor	483.828	-1.24017	0.50082	-2.47627	0.0132761	0.180823
ENSMUSG00000061740	Cyp2d22	240.355	-0.911845	0.368205	-2.47646	0.0132693	0.180823
ENSMUSG00000010064	Slc38a3	57.5496	1.88898	0.76314	2.47527	0.0133136	0.181159
ENSMUSG00000048772	Tmem53	103.489	-1.08962	0.440254	-2.47498	0.0133245	0.181159
ENSMUSG00000006651	Aplp1	285.691	1.34941	0.54608	2.47108	0.0134704	0.18298
ENSMUSG00000031626	Sorbs2	449.424	-0.93227	0.377387	-2.47033	0.0134989	0.183204
ENSMUSG00000026786	Apbb1ip	261.811	0.905741	0.367041	2.46768	0.013599	0.184074
ENSMUSG00000032058	Ppp2r1b	789.625	-1.79428	0.727095	-2.46774	0.0135968	0.184074
ENSMUSG00000033910	Gucy1a1	390.859	-1.48847	0.603034	-2.4683	0.0135756	0.184074
ENSMUSG00000029992	Gfpt1	1680.81	0.735565	0.298217	2.46654	0.0136426	0.184442
ENSMUSG00000058396	Gpr182	87.6546	-1.62156	0.657479	-2.46634	0.0136503	0.184442
ENSMUSG00000056220	Pla2g4a	284.122	1.28343	0.520785	2.46441	0.0137238	0.185271
ENSMUSG00000040653	Ppp1r14c	96.5283	2.09788	0.851489	2.46378	0.013748	0.185434
ENSMUSG00000020964	Sel1l	2269.12	0.720957	0.29271	2.46304	0.0137764	0.185654
ENSMUSG00000071714	Csf2rb2	480.582	-1.68018	0.682837	-2.46058	0.0138712	0.186767
ENSMUSG00000054434	Tmem120b	393.434	-1.32576	0.538944	-2.45992	0.0138968	0.186947
ENSMUSG00000037206	Islr	1479.26	0.794692	0.323192	2.45889	0.0139368	0.187321
ENSMUSG00000007655	Cav1	9187.23	-1.29369	0.526251	-2.45832	0.013959	0.187455
ENSMUSG00000041161	Otud3	151.614	0.984602	0.400574	2.45798	0.0139722	0.187468
ENSMUSG00000038065	Mturn	968.583	-1.16024	0.472397	-2.45608	0.0140462	0.188295
ENSMUSG00000027329	Spef1	495.805	-0.884658	0.360319	-2.45521	0.0140804	0.188424
ENSMUSG00000055413	H2-Q5	24.3969	-1.85918	0.757192	-2.45536	0.0140743	0.188424
ENSMUSG00000005583	Mef2c	1495.02	0.896	0.365137	2.45387	0.0141327	0.188844
ENSMUSG00000025006	Sorbs1	876.948	-2.25576	0.919302	-2.45378	0.0141365	0.188844
ENSMUSG00000044199	S1pr4	55.5828	-1.75151	0.714081	-2.45282	0.0141742	0.189022
ENSMUSG00000074006	Omp	69.5028	-1.86592	0.760726	-2.45281	0.0141745	0.189022
ENSMUSG00000036862	Dchs1	918.784	0.850146	0.346661	2.45239	0.0141912	0.18908
ENSMUSG00000030545	Pex11a	154.515	-2.13615	0.871908	-2.44998	0.0142865	0.190063
ENSMUSG00000035407	Kank4	98.5265	-1.05734	0.431642	-2.44958	0.0143022	0.190063
ENSMUSG00000102635	Gm36638	14.6252	-2.47719	1.01115	-2.44988	0.0142902	0.190063
ENSMUSG00000020473	Aebp1	7806.78	1.15509	0.471719	2.44869	0.0143376	0.190368
ENSMUSG00000024339	Tap2	758.762	-1.0259	0.419165	-2.44748	0.0143858	0.190842
ENSMUSG00000099411	2310015D24Rik	34.84	2.31617	0.947002	2.4458	0.0144532	0.191571
ENSMUSG00000051985	Igfn1	343.785	11.6972	4.78488	2.44463	0.0145001	0.192026
ENSMUSG00000074457	S100a16	1371.8	-0.792557	0.324392	-2.44321	0.0145574	0.192618
ENSMUSG00000000093	Tbx2	300.336	-0.969587	0.397213	-2.44097	0.0146477	0.193479
ENSMUSG00000033196	Myh2	208.851	-1.57779	0.646322	-2.44118	0.0146395	0.193479
ENSMUSG00000022853	Ehhadh	142.834	-1.83458	0.751689	-2.44061	0.0146625	0.193507
ENSMUSG00000032116	Stt3a	3687.45	0.971523	0.398135	2.44019	0.0146797	0.193567
ENSMUSG00000026387	Sctr	82.1107	-2.4218	0.992845	-2.43926	0.0147176	0.193733
ENSMUSG00000103088	Pcdhgb6	152.002	1.09222	0.447739	2.4394	0.0147116	0.193733
ENSMUSG00000024986	Hhex	106.811	-1.28853	0.528481	-2.43818	0.0147614	0.194142
ENSMUSG00000036327	Qsox2	386.212	1.01601	0.417508	2.43352	0.0149528	0.196191
ENSMUSG00000045954	Cavin2	1959.01	-1.82909	0.751535	-2.43381	0.0149409	0.196191
ENSMUSG00000109984	Gm38948	13.4367	-2.35243	0.966705	-2.43345	0.0149555	0.196191
ENSMUSG00000028246	Faxc	105.366	1.06948	0.43969	2.43235	0.0150014	0.196604
ENSMUSG00000033214	Slitrk5	49.3941	-2.31527	0.952202	-2.43149	0.015037	0.196604
ENSMUSG00000039683	Sdk1	134.073	1.40579	0.578025	2.43206	0.0150134	0.196604
ENSMUSG00000046056	Sbsn	196.7	1.56449	0.643439	2.43145	0.0150384	0.196604
ENSMUSG00000047409	Ctdspl	1118.7	-0.843099	0.346815	-2.43097	0.0150583	0.196696
ENSMUSG00000032724	Abtb2	261.952	1.1539	0.474842	2.43007	0.015096	0.196852
ENSMUSG00000086891	Gm15963	16.7389	-2.38993	0.983478	-2.43008	0.0150953	0.196852
ENSMUSG00000002799	Jag2	441.441	-1.21205	0.498911	-2.4294	0.0151239	0.197048
ENSMUSG00000022479	Vdr	18.6663	2.41149	0.993012	2.42847	0.0151629	0.197388
ENSMUSG00000022661	Cd200	1220.42	-0.760349	0.313496	-2.42539	0.0152921	0.198732
ENSMUSG00000060600	Eno3	4785.66	1.94802	0.803126	2.42555	0.0152852	0.198732
ENSMUSG00000021373	Cap2	444.994	1.28096	0.528329	2.42455	0.0153273	0.199021
ENSMUSG00000109498	Gm45222	18.4355	-2.28444	0.942457	-2.42392	0.0153541	0.199201
ENSMUSG00000024600	Slc27a6	178.265	1.63072	0.672862	2.42355	0.0153695	0.199231
ENSMUSG00000032369	Plscr1	96.8946	-1.11274	0.459196	-2.42324	0.0153826	0.199232
ENSMUSG00000106121	Gm42679	17.3206	-2.57623	1.06342	-2.4226	0.01541	0.199419
ENSMUSG00000018899	Irf1	487.419	-1.06778	0.441015	-2.42118	0.0154702	0.199484
ENSMUSG00000020846	Rflnb	3785.6	-0.97744	0.4037	-2.4212	0.0154693	0.199484
ENSMUSG00000029228	Lnx1	241.125	0.962016	0.397288	2.42146	0.0154584	0.199484
ENSMUSG00000038402	Foxf2	14.9603	2.28639	0.944559	2.42059	0.0154954	0.199484
ENSMUSG00000074001	Klhl40	123.436	2.89275	1.19518	2.42033	0.0155063	0.199484
ENSMUSG00000097042	Gm17491	77.8544	-1.20329	0.497053	-2.42084	0.0154848	0.199484
ENSMUSG00000110159	Gm45501	31.4351	-1.93688	0.800187	-2.42054	0.0154976	0.199484
ENSMUSG00000040428	Plekha4	222.542	-0.940056	0.388461	-2.41995	0.0155228	0.199528
ENSMUSG00000025137	Pcyt2	470.881	-0.813956	0.336536	-2.41863	0.0155791	0.199582
ENSMUSG00000027901	Dennd2d	28.4213	-2.0792	0.859653	-2.41865	0.0155781	0.199582
ENSMUSG00000037490	Slc2a12	87.1102	1.20387	0.497598	2.41937	0.0155474	0.199582
ENSMUSG00000063193	Cd300lb	56.4434	1.43637	0.593741	2.41918	0.0155554	0.199582
ENSMUSG00000031897	Psmb10	331.338	-1.18391	0.489646	-2.4179	0.0156105	0.19965
ENSMUSG00000085078	C030013C21Rik	71.068	-1.42793	0.590511	-2.41812	0.0156009	0.19965
ENSMUSG00000001119	Col6a1	59811.1	1.19143	0.493502	2.41423	0.0157686	0.201481
ENSMUSG00000031202	Rab39b	41.0146	1.83892	0.761785	2.41396	0.01578	0.201481
ENSMUSG00000023484	Prph	40.0105	1.66402	0.689626	2.41293	0.0158248	0.201885
ENSMUSG00000074039	4930520O04Rik	17.382	-2.0717	0.859067	-2.41157	0.0158839	0.20247
ENSMUSG00000021215	Net1	1656.91	-2.0487	0.850156	-2.4098	0.0159615	0.202615
ENSMUSG00000021732	Fgf10	96.4968	-2.79154	1.15822	-2.41019	0.0159441	0.202615
ENSMUSG00000021957	Tkt	1705.34	-0.919988	0.381682	-2.41035	0.0159372	0.202615
ENSMUSG00000024085	Man2a1	2047.33	0.99089	0.411148	2.41006	0.0159501	0.202615
ENSMUSG00000074793	Hspa12b	681.219	-1.43845	0.596687	-2.41073	0.0159207	0.202615
ENSMUSG00000029231	Pdgfra	2419.32	0.871707	0.361926	2.40852	0.0160172	0.202826
ENSMUSG00000047910	Pcdhb16	98.6448	1.06072	0.440407	2.40851	0.0160178	0.202826
ENSMUSG00000104125	Gm37488	16.1458	-2.36264	0.980717	-2.40909	0.0159924	0.202826
ENSMUSG00000038932	Tcfl5	75.0756	1.19021	0.49429	2.40792	0.0160437	0.202987
ENSMUSG00000027875	Hmgcs2	73.3873	-1.93697	0.804829	-2.40668	0.0160981	0.203506
ENSMUSG00000041930	Fam222a	28.3605	-2.64518	1.09947	-2.40586	0.0161344	0.203797
ENSMUSG00000020173	Cobl	212.163	1.51136	0.628456	2.40488	0.0161776	0.204174
ENSMUSG00000037577	Ephx3	82.5607	-1.73529	0.722008	-2.40343	0.0162423	0.204821
ENSMUSG00000020154	Ptprb	2606.45	-1.59253	0.662733	-2.40298	0.0162622	0.204888
ENSMUSG00000033191	Tie1	1457.91	-1.42007	0.591031	-2.4027	0.0162743	0.204888
ENSMUSG00000030737	Slco2b1	604.193	-1.49143	0.621044	-2.40149	0.0163285	0.205401
ENSMUSG00000022241	Tars	1412.7	0.851147	0.354522	2.40083	0.016358	0.205411
ENSMUSG00000027966	Col11a1	28818	1.54613	0.644228	2.39997	0.0163964	0.205411
ENSMUSG00000056498	Tmem154	289.729	1.39522	0.581254	2.40035	0.0163792	0.205411
ENSMUSG00000061397	Krt79	43.8345	-2.22521	0.927133	-2.4001	0.0163907	0.205411
ENSMUSG00000067879	3110035E14Rik	15.8886	2.26132	0.941992	2.40058	0.0163693	0.205411
ENSMUSG00000029544	Cabp1	224.625	0.958413	0.399706	2.39779	0.0164941	0.206467
ENSMUSG00000021338	Carmil1	544.824	0.919112	0.383551	2.39632	0.0165605	0.206896
ENSMUSG00000023909	Paqr4	351.727	-0.937037	0.391062	-2.39614	0.016569	0.206896
ENSMUSG00000057729	Prtn3	27.0369	-2.96359	1.23679	-2.39619	0.0165665	0.206896
ENSMUSG00000066000	Zfp979	95.8407	-1.2803	0.534464	-2.39548	0.0165985	0.207095
ENSMUSG00000002365	Snx9	1373.92	0.751319	0.313924	2.39332	0.0166968	0.208153
ENSMUSG00000030137	Tuba8	161.177	2.17526	0.909479	2.39176	0.0167676	0.208695
ENSMUSG00000032946	Rasgrp2	247.421	-1.63476	0.683423	-2.39202	0.0167557	0.208695
ENSMUSG00000026615	Eprs	3770.68	0.829196	0.346823	2.39084	0.0168101	0.209054
ENSMUSG00000037225	Fgf2	975.99	0.823239	0.344386	2.39045	0.0168275	0.209101
ENSMUSG00000015766	Eps8	863.307	0.854759	0.357707	2.38955	0.0168689	0.209446
ENSMUSG00000032548	Slco2a1	541.128	-1.08723	0.455051	-2.38924	0.0168832	0.209453
ENSMUSG00000032596	Uba7	209.651	-1.48086	0.619931	-2.38875	0.0169056	0.209477
ENSMUSG00000034563	Ccpg1	275.939	0.901065	0.377235	2.3886	0.0169125	0.209477
ENSMUSG00000005360	Slc1a3	1146.19	-1.61321	0.675928	-2.38666	0.0170022	0.210418
ENSMUSG00000000278	Scpep1	2256.51	0.97763	0.409704	2.38618	0.0170243	0.21052
ENSMUSG00000045776	Lrtm1	55.4905	1.95582	0.819899	2.38545	0.0170584	0.210773
ENSMUSG00000030168	Adipor2	2639.29	-1.67153	0.700878	-2.38491	0.0170833	0.210909
ENSMUSG00000091383	Hist1h2al	73.517	-3.16526	1.32768	-2.38406	0.0171228	0.211227
ENSMUSG00000071657	Bscl2	1383.24	-1.11766	0.468886	-2.38366	0.0171416	0.211289
ENSMUSG00000026473	Glul	6050.78	-1.31081	0.550057	-2.38305	0.01717	0.211427
ENSMUSG00000054435	Gimap4	238.062	-1.43207	0.601074	-2.38253	0.0171942	0.211427
ENSMUSG00000071713	Csf2rb	574.119	-1.76245	0.739689	-2.38269	0.0171868	0.211427
ENSMUSG00000053559	Smagp	127.494	-1.18807	0.498821	-2.38176	0.0172301	0.211697
ENSMUSG00000020826	Nos2	52.6057	-1.82366	0.7664	-2.37951	0.0173356	0.212824
ENSMUSG00000026827	Gpd2	579.038	0.757289	0.318308	2.37911	0.0173546	0.212886
ENSMUSG00000019883	Echdc1	178.098	-1.99378	0.838256	-2.37848	0.0173842	0.213078
ENSMUSG00000037820	Tgm2	2775.82	-0.707426	0.297607	-2.37705	0.0174519	0.213376
ENSMUSG00000038843	Gcnt1	166.36	1.06466	0.447889	2.37706	0.0174514	0.213376
ENSMUSG00000042106	Fam212a	86.8393	-1.30874	0.550698	-2.37651	0.0174775	0.213376
ENSMUSG00000044258	Ctla2a	253.637	-1.58659	0.667618	-2.37649	0.0174782	0.213376
ENSMUSG00000102742	Pcdhga11	95.1532	1.30901	0.550706	2.37697	0.0174555	0.213376
ENSMUSG00000020067	Mypn	258.77	2.73563	1.15174	2.3752	0.0175393	0.213952
ENSMUSG00000020863	Luc7l3	1802.55	-0.75641	0.318598	-2.37418	0.0175878	0.214373
ENSMUSG00000010651	Acaa1b	32.4276	-2.44302	1.02951	-2.373	0.017644	0.214716
ENSMUSG00000028270	Gbp2	268.021	-1.47287	0.620663	-2.37306	0.0176414	0.214716
ENSMUSG00000097640	Gm20033	47.9915	-1.34511	0.567007	-2.37229	0.0176781	0.214959
ENSMUSG00000041193	Pla2g5	1656.2	-1.71427	0.72303	-2.37095	0.0177423	0.215569
ENSMUSG00000006344	Ggt5	328.519	-1.19057	0.502306	-2.37022	0.0177777	0.215828
ENSMUSG00000018171	Vmp1	834.882	0.748536	0.316154	2.36763	0.0179026	0.216075
ENSMUSG00000032988	Slc16a8	76.5243	1.16901	0.493758	2.36758	0.0179048	0.216075
ENSMUSG00000036155	Mgat5	482.731	0.878668	0.371	2.36838	0.0178662	0.216075
ENSMUSG00000045667	Smtnl2	224.853	1.25721	0.530852	2.36829	0.0178705	0.216075
ENSMUSG00000057286	St6galnac2	127.61	-1.18345	0.499705	-2.3683	0.0178699	0.216075
ENSMUSG00000067081	Asb18	22.726	2.90081	1.22484	2.36832	0.0178693	0.216075
ENSMUSG00000071317	Bves	49.6681	2.87262	1.21338	2.36745	0.017911	0.216075
ENSMUSG00000071359	Tbpl1	416.454	0.770734	0.325383	2.36869	0.017851	0.216075
ENSMUSG00000036136	Fam110c	18.4255	-4.32877	1.82868	-2.36716	0.0179254	0.216079
ENSMUSG00000001507	Itga3	224.057	-1.15945	0.490106	-2.36572	0.0179953	0.216483
ENSMUSG00000030889	Vwa3a	33.9585	-2.52037	1.06543	-2.36559	0.0180013	0.216483
ENSMUSG00000044551	9930012K11Rik	33.668	-1.48594	0.62814	-2.36563	0.0179997	0.216483
ENSMUSG00000110167	Gm45532	18.0059	-2.03041	0.858542	-2.36495	0.0180323	0.216685
ENSMUSG00000027952	Pmvk	148.392	-1.03804	0.439227	-2.36333	0.0181114	0.217465
ENSMUSG00000050965	Prkca	939.208	1.10712	0.468816	2.36153	0.0181996	0.218352
ENSMUSG00000106186	Gm43627	35.0907	-1.47079	0.623113	-2.36039	0.0182558	0.218855
ENSMUSG00000007613	Tgfbr1	1273.16	0.854158	0.362114	2.35881	0.0183338	0.219618
ENSMUSG00000024830	Rps6kb2	320.893	-0.785859	0.333308	-2.35775	0.0183859	0.22007
ENSMUSG00000019970	Sgk1	1377.61	0.743848	0.315619	2.35679	0.0184337	0.220126
ENSMUSG00000075028	Prdm11	193.66	-0.911578	0.386763	-2.35694	0.0184263	0.220126
ENSMUSG00000107148	Gm42888	21.1648	-1.82204	0.773019	-2.35704	0.0184213	0.220126
ENSMUSG00000026413	Pkp1	41.0418	1.85171	0.78595	2.35601	0.0184723	0.220415
ENSMUSG00000028278	Rragd	371.911	1.89737	0.80549	2.35555	0.0184952	0.220516
ENSMUSG00000047789	Slc38a9	450.715	-1.11676	0.474298	-2.35455	0.018545	0.220938
ENSMUSG00000020717	Pecam1	3080.65	-1.43916	0.611755	-2.35251	0.0186473	0.221832
ENSMUSG00000051652	Lrrc3	74.4546	-1.64811	0.700585	-2.35247	0.018649	0.221832
ENSMUSG00000032452	Clstn2	81.4175	-2.02638	0.86173	-2.35153	0.0186966	0.222226
ENSMUSG00000023045	Soat2	78.3161	1.69968	0.723009	2.35084	0.0187308	0.222287
ENSMUSG00000033102	Cdc14b	252.839	0.843536	0.358817	2.35088	0.0187292	0.222287
ENSMUSG00000035561	Aldh1b1	14.1456	2.47321	1.05237	2.35013	0.0187667	0.22254
ENSMUSG00000024501	Dpysl3	5180.04	1.20319	0.512049	2.34976	0.0187856	0.222592
ENSMUSG00000026586	Prrx1	8543.28	0.962299	0.410055	2.34676	0.0189376	0.22422
ENSMUSG00000021171	Esyt2	2825.33	0.812017	0.346306	2.34479	0.0190376	0.22523
ENSMUSG00000000058	Cav2	1913.7	-1.29254	0.551543	-2.34349	0.0191044	0.225412
ENSMUSG00000030592	Ryr1	3118.35	2.64704	1.1294	2.34376	0.0190903	0.225412
ENSMUSG00000032437	Stt3b	2347.8	0.71619	0.305611	2.34347	0.0191053	0.225412
ENSMUSG00000039376	Synpo2l	243.124	2.23251	0.952728	2.34328	0.0191151	0.225412
ENSMUSG00000040249	Lrp1	28679.4	0.757853	0.323447	2.34305	0.0191266	0.225412
ENSMUSG00000054252	Fgfr3	181.932	1.05272	0.449626	2.34132	0.0192157	0.226287
ENSMUSG00000065987	Cd209b	78.0073	-2.89595	1.23766	-2.33986	0.0192909	0.226998
ENSMUSG00000032115	Hyou1	1244.98	0.89507	0.382624	2.3393	0.0193201	0.227167
ENSMUSG00000023883	Phf10	1226.1	0.736997	0.315196	2.33821	0.0193761	0.227533
ENSMUSG00000043943	Naalad2	138.911	-1.15195	0.49268	-2.33812	0.0193809	0.227533
ENSMUSG00000021303	Gng4	35.8756	1.93767	0.829474	2.33602	0.0194901	0.228143
ENSMUSG00000028792	Ak2	1172.54	-1.30938	0.56053	-2.33598	0.0194925	0.228143
ENSMUSG00000045362	Tnfrsf26	13.9832	-2.26272	0.968513	-2.33629	0.0194764	0.228143
ENSMUSG00000053007	Creb5	489.017	1.07247	0.459024	2.33642	0.0194696	0.228143
ENSMUSG00000030108	Slc6a13	27.7233	-1.94778	0.833934	-2.33565	0.0195093	0.228165
ENSMUSG00000002985	Apoe	15198.3	-1.76752	0.7571	-2.3346	0.0195645	0.228636
ENSMUSG00000102448	Gm37101	14.124	-2.41366	1.03406	-2.33415	0.019588	0.228736
ENSMUSG00000032252	Glce	927.859	0.972554	0.416815	2.3333	0.0196325	0.228906
ENSMUSG00000072812	Ahnak2	1458.58	1.08924	0.466791	2.33346	0.0196242	0.228906
ENSMUSG00000067276	Capn6	973.765	1.6049	0.688236	2.3319	0.0197057	0.229585
ENSMUSG00000026421	Csrp1	2511.81	-0.801922	0.344107	-2.33045	0.0197826	0.230131
ENSMUSG00000032020	Ubash3b	150.353	0.964638	0.413887	2.33068	0.0197702	0.230131
ENSMUSG00000075596	B130006D01Rik	20.1546	-1.83139	0.786076	-2.32979	0.0198175	0.230362
ENSMUSG00000022371	Col14a1	3907.33	1.30956	0.562531	2.32798	0.0199131	0.231297
ENSMUSG00000020928	Higd1b	38.2328	-2.00826	0.86277	-2.32769	0.0199288	0.231304
ENSMUSG00000027868	Tbx15	2380.05	1.08877	0.468025	2.3263	0.0200024	0.231983
ENSMUSG00000031373	Car5b	745.918	-1.41337	0.607917	-2.32494	0.0200751	0.232427
ENSMUSG00000050592	Fam78a	83.0023	1.23282	0.530254	2.32496	0.0200742	0.232427
ENSMUSG00000090118	Gm16163	20.654	-4.15852	1.78882	-2.32473	0.0200863	0.232427
ENSMUSG00000046329	Slc25a23	420.1	-1.14527	0.492883	-2.32362	0.0201461	0.232943
ENSMUSG00000022519	Srl	1457.04	2.06062	0.887	2.32313	0.0201722	0.233068
ENSMUSG00000019873	Reep3	2427	0.700658	0.301882	2.32096	0.0202888	0.233784
ENSMUSG00000032845	Alpk2	16.2737	3.01413	1.29849	2.32126	0.0202729	0.233784
ENSMUSG00000040268	Plekha1	1522.74	0.678367	0.292206	2.32153	0.020258	0.233784
ENSMUSG00000079505	Gm11131	19.1449	-2.16662	0.933548	-2.32085	0.0202952	0.233784
ENSMUSG00000032228	Tcf12	1825.28	0.70447	0.303758	2.31918	0.0203852	0.234292
ENSMUSG00000033991	Ttc37	416.849	0.867188	0.373888	2.31938	0.0203744	0.234292
ENSMUSG00000100862	Gm10925	92.2747	-1.07413	0.463047	-2.3197	0.0203572	0.234292
ENSMUSG00000020123	Avpr1a	46.7521	-2.34631	1.01288	-2.31648	0.0205322	0.235099
ENSMUSG00000034593	Myo5a	1587.32	0.730548	0.315323	2.31682	0.0205134	0.235099
ENSMUSG00000040354	Mars	1165.73	0.760185	0.328138	2.31666	0.0205221	0.235099
ENSMUSG00000050147	F2rl3	22.4858	-2.05141	0.885285	-2.31723	0.020491	0.235099
ENSMUSG00000078920	Ifi47	82.3425	-1.75936	0.759461	-2.31659	0.020526	0.235099
ENSMUSG00000074207	Adh1	210.07	-1.76567	0.762421	-2.31587	0.0205652	0.2353
ENSMUSG00000087291	Gm11946	47.7834	-1.5028	0.649181	-2.31492	0.0206171	0.235719
ENSMUSG00000033453	Adamts15	416.5	-0.948867	0.410395	-2.31208	0.0207732	0.237327
ENSMUSG00000024962	Vegfb	335.762	-1.4511	0.628829	-2.30763	0.0210199	0.23947
ENSMUSG00000056476	Med12l	107.939	1.11245	0.482001	2.30799	0.0209996	0.23947
ENSMUSG00000058571	Gpc6	759.893	1.04265	0.451804	2.30776	0.0210128	0.23947
ENSMUSG00000092274	Neat1	24264.2	-0.704016	0.305091	-2.30756	0.0210235	0.23947
ENSMUSG00000036377	C530008M17Rik	61.2992	1.34761	0.584292	2.3064	0.0210884	0.240031
ENSMUSG00000032051	Fdx1	372.132	-0.833103	0.361323	-2.3057	0.0211274	0.240297
ENSMUSG00000019230	Lhx9	431.338	1.24702	0.540919	2.30538	0.0211455	0.240324
ENSMUSG00000025776	Crispld1	2016.21	1.49639	0.6492	2.30498	0.0211676	0.240397
ENSMUSG00000045211	Nudt18	585.103	-0.832064	0.361078	-2.30439	0.0212008	0.240417
ENSMUSG00000107436	Gm44416	105.577	-1.12878	0.489784	-2.30465	0.0211864	0.240417
ENSMUSG00000028405	Aco1	1201.63	-1.30134	0.565066	-2.30299	0.0212794	0.24113
ENSMUSG00000022941	Ripply3	33.8204	-2.12679	0.923734	-2.30238	0.0213136	0.241339
ENSMUSG00000021510	Zfp729a	115.8	1.04809	0.455512	2.30091	0.021397	0.241568
ENSMUSG00000042476	Abcb4	121.351	1.7967	0.780685	2.30144	0.0213665	0.241568
ENSMUSG00000063296	Tmem117	283.469	1.43552	0.623686	2.30167	0.0213535	0.241568
ENSMUSG00000073530	Pappa2	131.133	1.40342	0.609916	2.30101	0.021391	0.241568
ENSMUSG00000047822	Angptl8	26.3068	-2.61768	1.13819	-2.29987	0.0214555	0.24205
ENSMUSG00000041329	Atp1b2	782.694	0.817404	0.355479	2.29945	0.0214796	0.242144
ENSMUSG00000053024	Cntn2	81.0156	1.4178	0.616778	2.29871	0.0215212	0.242375
ENSMUSG00000054408	Spcs3	1547.18	0.803216	0.349448	2.29853	0.0215317	0.242375
ENSMUSG00000062077	Trim54	216.164	2.66983	1.16177	2.29808	0.0215573	0.242484
ENSMUSG00000029605	Oas1b	34.8673	-1.57714	0.686439	-2.29757	0.0215862	0.242631
ENSMUSG00000027248	Pdia3	9451.44	0.863852	0.376175	2.29641	0.0216524	0.243018
ENSMUSG00000048251	Rit1	15.5239	2.09827	0.913681	2.2965	0.0216472	0.243018
ENSMUSG00000036040	Adamtsl2	829.499	1.05585	0.459895	2.29585	0.0216845	0.2432
ENSMUSG00000004317	Clcn5	396.545	0.960542	0.418657	2.29434	0.0217709	0.243811
ENSMUSG00000095597	Gm6472	302.941	2.10602	0.917908	2.29437	0.0217691	0.243811
ENSMUSG00000036611	Eepd1	414.583	-1.99734	0.87094	-2.29332	0.0218299	0.244293
ENSMUSG00000086784	Isoc2a	604.84	-0.948222	0.413846	-2.29124	0.0219494	0.245451
ENSMUSG00000038028	Tigar	213.621	0.929437	0.40573	2.29077	0.0219764	0.245575
ENSMUSG00000029370	Rassf6	13.182	-2.29423	1.00188	-2.28993	0.0220255	0.245944
ENSMUSG00000024053	Emilin2	650.162	0.83517	0.364976	2.28828	0.022121	0.246132
ENSMUSG00000029455	Aldh2	4712.72	-1.07872	0.471369	-2.28847	0.0221099	0.246132
ENSMUSG00000031290	Lrch2	150.895	1.05486	0.460985	2.28828	0.0221211	0.246132
ENSMUSG00000041957	Pkp2	38.7414	-3.33511	1.45767	-2.28798	0.0221389	0.246132
ENSMUSG00000044042	Fmn1	562.332	1.03045	0.450167	2.28904	0.0220768	0.246132
ENSMUSG00000066154	Mup3	22.3757	-4.00448	1.75007	-2.28819	0.0221267	0.246132
ENSMUSG00000027360	Hdc	23.7971	-1.91056	0.835339	-2.28716	0.0221864	0.246302
ENSMUSG00000039304	Tnfsf10	266.419	-1.5926	0.69627	-2.28734	0.0221763	0.246302
ENSMUSG00000073147	5031425E22Rik	448.84	-0.822739	0.35978	-2.28678	0.0222084	0.246368
ENSMUSG00000081769	Gm12216	59.9166	-1.30669	0.571741	-2.28546	0.0222856	0.247046
ENSMUSG00000000957	Mmp14	4289.9	1.13684	0.49772	2.28409	0.0223661	0.247595
ENSMUSG00000030401	Rtn2	535.297	1.51853	0.664836	2.28407	0.0223675	0.247595
ENSMUSG00000031608	Galnt7	471.729	0.830987	0.363952	2.28323	0.0224168	0.247962
ENSMUSG00000050796	B3galt6	155.748	0.897211	0.393324	2.2811	0.0225425	0.249172
ENSMUSG00000053963	Stum	59.6789	-1.24766	0.547285	-2.27973	0.0226238	0.24989
ENSMUSG00000025283	Sat1	1433.35	0.682296	0.299337	2.27936	0.0226459	0.249909
ENSMUSG00000067261	Foxd3	32.6128	-1.6957	0.744006	-2.27915	0.0226581	0.249909
ENSMUSG00000039167	Adgrl4	715.079	-1.58677	0.696478	-2.27827	0.0227102	0.250303
ENSMUSG00000038811	Gngt2	116.968	-1.339	0.587887	-2.27765	0.0227477	0.250355
ENSMUSG00000105041	Gm42676	35.8441	-1.73049	0.75976	-2.27768	0.0227457	0.250355
ENSMUSG00000103668	Gm38186	12.4731	2.43432	1.06914	2.27689	0.0227926	0.25067
ENSMUSG00000030098	Grip2	55.0571	-1.28308	0.563946	-2.27519	0.0228947	0.25157
ENSMUSG00000110874	D030045P18Rik	32.0818	-2.09818	0.922288	-2.27498	0.0229073	0.25157
ENSMUSG00000024413	Npc1	833.163	0.687695	0.302373	2.27433	0.0229464	0.251638
ENSMUSG00000026860	Sh3glb2	1268.27	-0.808514	0.355495	-2.27434	0.0229458	0.251638
ENSMUSG00000035493	Tgfbi	10243.2	1.19552	0.525892	2.27333	0.0230066	0.251775
ENSMUSG00000035842	Ddx11	61.8602	-1.14228	0.502478	-2.2733	0.0230083	0.251775
ENSMUSG00000106430	Gm42460	13.7681	3.42955	1.50831	2.27377	0.0229799	0.251775
ENSMUSG00000026580	Selp	236.898	-1.42375	0.626841	-2.27131	0.0231285	0.252098
ENSMUSG00000028681	Ptch2	70.381	-2.09111	0.920601	-2.27147	0.0231188	0.252098
ENSMUSG00000030157	Clec2d	552.181	-1.2208	0.537586	-2.2709	0.023153	0.252098
ENSMUSG00000031805	Jak3	480.433	-1.61672	0.711508	-2.27225	0.0230715	0.252098
ENSMUSG00000038775	Vill	89.9297	-1.03432	0.455388	-2.27129	0.0231295	0.252098
ENSMUSG00000059772	Slx1b	179.811	-0.87796	0.3866	-2.27098	0.0231484	0.252098
ENSMUSG00000075410	Prcd	24.4295	-1.75258	0.771456	-2.27178	0.0230996	0.252098
ENSMUSG00000020806	Rhbdf2	200.738	-0.89261	0.393262	-2.26976	0.0232221	0.25267
ENSMUSG00000021065	Fut8	681.989	0.713642	0.314466	2.26938	0.0232453	0.252743
ENSMUSG00000038146	Notch3	2095.32	-1.47719	0.651021	-2.26904	0.0232659	0.252788
ENSMUSG00000043154	Ppp2r3a	820.518	0.706692	0.311507	2.26862	0.0232912	0.252883
ENSMUSG00000033082	Clec1a	100.002	-1.77192	0.781257	-2.26804	0.0233269	0.253091
ENSMUSG00000031367	Ap1s2	530.247	0.719264	0.31729	2.2669	0.0233966	0.253488
ENSMUSG00000066319	Rtp3	27.8761	-2.2675	1.00016	-2.26714	0.0233819	0.253488
ENSMUSG00000022617	Chkb	642.655	-0.709412	0.313094	-2.26581	0.0234631	0.253669
ENSMUSG00000026435	Slc45a3	71.2456	1.1664	0.514732	2.26603	0.0234494	0.253669
ENSMUSG00000071711	Mpst	521.297	-0.761524	0.336025	-2.26627	0.0234347	0.253669
ENSMUSG00000029862	Clcn1	98.4264	2.3925	1.05643	2.2647	0.0235309	0.254224
ENSMUSG00000032118	Fez1	259.203	1.34005	0.59227	2.26256	0.0236628	0.255468
ENSMUSG00000022235	Cmbl	150.165	-1.23684	0.546892	-2.26158	0.0237236	0.255476
ENSMUSG00000026564	Dusp27	75.5495	2.64988	1.17136	2.26222	0.0236836	0.255476
ENSMUSG00000040562	Gstm2	392.431	-1.54016	0.681045	-2.26147	0.0237303	0.255476
ENSMUSG00000067158	Col4a4	364.086	-1.70836	0.755297	-2.26183	0.0237077	0.255476
ENSMUSG00000032332	Col12a1	27941.1	1.45703	0.644675	2.26011	0.0238147	0.256205
ENSMUSG00000044783	Hjurp	1044.2	-0.970562	0.429546	-2.2595	0.023852	0.256426
ENSMUSG00000028456	Unc13b	143.105	-1.05903	0.469005	-2.25804	0.0239429	0.257222
ENSMUSG00000029636	Wasf3	94.7636	1.11269	0.493175	2.25617	0.0240601	0.258085
ENSMUSG00000035873	Pawr	58.9265	-1.85859	0.824001	-2.25557	0.0240976	0.258085
ENSMUSG00000041594	Tmtc4	310.463	1.01863	0.45164	2.25541	0.0241074	0.258085
ENSMUSG00000044338	Aplnr	1107.25	-1.66686	0.739038	-2.25545	0.024105	0.258085
ENSMUSG00000050192	Eif5a2	172.315	0.898738	0.398479	2.25542	0.024107	0.258085
ENSMUSG00000061353	Cxcl12	4242.84	-1.28244	0.568818	-2.25457	0.0241605	0.258472
ENSMUSG00000023868	Pde10a	410.544	1.01376	0.449762	2.25398	0.0241972	0.258504
ENSMUSG00000024985	Tcf7l2	458.212	-0.792846	0.351715	-2.25423	0.0241819	0.258504
ENSMUSG00000030116	Mfap5	1148.63	0.787112	0.349534	2.25189	0.0243293	0.259372
ENSMUSG00000058070	Eml1	1594	0.807369	0.358488	2.25215	0.0243128	0.259372
ENSMUSG00000069806	Cacng7	247.023	0.931188	0.413461	2.25218	0.0243111	0.259372
ENSMUSG00000015829	Tnr	47.0751	1.84158	0.817957	2.25144	0.0243578	0.259495
ENSMUSG00000085395	Gm13056	22.9011	-1.86204	0.827261	-2.25085	0.0243951	0.259711
ENSMUSG00000000489	Pdgfb	561.243	-1.35165	0.600898	-2.24938	0.0244882	0.260388
ENSMUSG00000026483	Fam129a	3472.54	1.02621	0.456234	2.24931	0.0244927	0.260388
ENSMUSG00000000690	Hoxb6	42.5553	-1.73832	0.773206	-2.2482	0.0245634	0.260862
ENSMUSG00000027075	Slc43a1	377.337	-0.774005	0.344297	-2.24808	0.0245713	0.260862
ENSMUSG00000021451	Sema4d	125.943	1.15983	0.516085	2.24736	0.0246173	0.260988
ENSMUSG00000027709	Mccc1	630.293	-1.55707	0.69278	-2.24757	0.0246039	0.260988
ENSMUSG00000028910	Mecr	299.939	-0.92003	0.409583	-2.24626	0.0246873	0.26143
ENSMUSG00000091831	Gm4707	20.0659	-1.9981	0.889561	-2.24617	0.0246931	0.26143
ENSMUSG00000011305	Plin5	40.3903	-2.24695	1.00054	-2.24573	0.0247216	0.26155
ENSMUSG00000045438	Cox19	316.145	-0.809475	0.360643	-2.24453	0.0247981	0.262178
ENSMUSG00000062593	Lilrb4a	216.843	0.943708	0.420533	2.24408	0.0248275	0.262308
ENSMUSG00000009633	G0s2	1093.62	-1.71252	0.763602	-2.24268	0.0249173	0.262351
ENSMUSG00000021102	Glrx5	836.485	-0.747434	0.333262	-2.24278	0.0249108	0.262351
ENSMUSG00000023206	Il15ra	315.267	-0.948789	0.422923	-2.24341	0.0248706	0.262351
ENSMUSG00000036169	Sostdc1	34.2703	-1.47373	0.657006	-2.2431	0.0248905	0.262351
ENSMUSG00000086363	A330102I10Rik	72.9865	-1.46232	0.651799	-2.24352	0.0248633	0.262351
ENSMUSG00000024659	Anxa1	3806.04	0.705843	0.315028	2.24057	0.0250538	0.262501
ENSMUSG00000026399	Cd55	820.955	0.996701	0.444801	2.24078	0.0250404	0.262501
ENSMUSG00000032640	Chsy1	718.192	1.0392	0.463757	2.24082	0.0250374	0.262501
ENSMUSG00000037470	Uggt1	1631.64	0.702905	0.313646	2.24108	0.0250208	0.262501
ENSMUSG00000055436	Srsf11	2868.44	-0.681726	0.304132	-2.24155	0.0249906	0.262501
ENSMUSG00000070880	Gad1	71.2158	1.12023	0.499835	2.24121	0.0250126	0.262501
ENSMUSG00000101414	Gm29101	15.9381	-2.63127	1.17374	-2.24179	0.024975	0.262501
ENSMUSG00000108633	Gm44694	47.1402	-1.24566	0.556012	-2.24034	0.0250687	0.262501
ENSMUSG00000032285	Dnaja4	209.188	0.847307	0.378297	2.23979	0.0251045	0.262517
ENSMUSG00000057722	Lepr	1239.79	-1.30854	0.584166	-2.24002	0.0250898	0.262517
ENSMUSG00000074746	Pdzd8	843.883	0.718711	0.320929	2.23947	0.0251253	0.262555
ENSMUSG00000104339	C130089K02Rik	16.3332	-1.97558	0.882332	-2.23905	0.0251527	0.262662
ENSMUSG00000024799	Tm7sf2	112.658	-0.946455	0.422872	-2.23816	0.0252108	0.26309
ENSMUSG00000031433	Rbm41	90.6655	1.02761	0.459558	2.23609	0.0253458	0.264318
ENSMUSG00000045287	Rtn4rl1	309.884	-1.52625	0.68276	-2.23541	0.0253905	0.264604
ENSMUSG00000052974	Cyp2f2	511.466	-1.55344	0.695114	-2.2348	0.0254302	0.264838
ENSMUSG00000000915	Hip1r	337.379	-0.8038	0.359883	-2.2335	0.0255158	0.265548
ENSMUSG00000064357	mt-Atp6	53.4666	-1.25371	0.561433	-2.23306	0.0255453	0.265675
ENSMUSG00000086067	Gm16183	17.8786	-2.11349	0.946639	-2.23263	0.0255734	0.265786
ENSMUSG00000024661	Fth1	12459.4	-0.781805	0.350499	-2.23055	0.025711	0.266854
ENSMUSG00000097587	4930578M01Rik	13.0866	-2.28859	1.02597	-2.23067	0.0257033	0.266854
ENSMUSG00000103285	Gm37274	27.6328	-1.52896	0.685559	-2.23024	0.0257317	0.266888
ENSMUSG00000038736	Nudcd1	256.373	0.989293	0.443676	2.22977	0.0257629	0.267031
ENSMUSG00000000794	Kcnn3	23.3627	1.7948	0.805607	2.22789	0.025888	0.267242
ENSMUSG00000026950	Neb	3850.76	2.50265	1.12302	2.2285	0.0258469	0.267242
ENSMUSG00000034194	R3hcc1	594.431	-0.756638	0.339523	-2.22853	0.0258452	0.267242
ENSMUSG00000037321	Tap1	316.683	-1.19771	0.537535	-2.22815	0.0258706	0.267242
ENSMUSG00000103916	Gm38071	35.4656	-1.36286	0.61163	-2.22823	0.0258649	0.267242
ENSMUSG00000108143	Gm44414	42.6757	-2.01261	0.902895	-2.22907	0.0258094	0.267242
ENSMUSG00000025932	Eya1	46.2988	1.54261	0.692728	2.22687	0.0259561	0.267441
ENSMUSG00000030774	Pak1	251.505	1.08728	0.488322	2.22655	0.0259772	0.267441
ENSMUSG00000042797	Aqp11	33.939	-1.67279	0.751249	-2.22667	0.0259691	0.267441
ENSMUSG00000046167	Gldn	60.7682	1.16145	0.521582	2.22679	0.0259613	0.267441
ENSMUSG00000094410	Gm38394	139.999	1.03265	0.463849	2.22627	0.0259963	0.267458
ENSMUSG00000016327	Atp1b4	21.4172	2.79252	1.25519	2.22478	0.0260962	0.26795
ENSMUSG00000030505	Prmt3	268.275	0.777471	0.349461	2.22477	0.0260966	0.26795
ENSMUSG00000042312	S100a13	738.25	-0.751757	0.337849	-2.22513	0.0260727	0.26795
ENSMUSG00000073418	C4b	7684.5	-2.12466	0.955128	-2.22448	0.0261164	0.267973
ENSMUSG00000020044	Timp3	6095.69	0.898617	0.404053	2.22401	0.0261478	0.268057
ENSMUSG00000020654	Adcy3	472.742	0.754303	0.33923	2.22357	0.0261771	0.268057
ENSMUSG00000025823	Pdia4	2211.45	0.810325	0.364409	2.22367	0.0261707	0.268057
ENSMUSG00000036106	Prr5	561.949	-0.802907	0.361197	-2.22291	0.0262221	0.268339
ENSMUSG00000021318	Gli3	261.331	0.851324	0.383105	2.22217	0.0262718	0.268667
ENSMUSG00000001768	Rin2	5899.75	0.933693	0.420402	2.22095	0.0263541	0.26897
ENSMUSG00000041660	Bbox1	25.4272	1.87275	0.843146	2.22114	0.0263414	0.26897
ENSMUSG00000052504	Epha3	658.84	1.60353	0.721882	2.22132	0.0263295	0.26897
ENSMUSG00000026576	Atp1b1	329.221	0.950347	0.427972	2.22058	0.0263793	0.269048
ENSMUSG00000029777	Gars	2438.63	0.874085	0.393805	2.21959	0.0264466	0.269555
ENSMUSG00000034471	Caskin2	1258.78	-0.791302	0.35666	-2.21864	0.026511	0.269961
ENSMUSG00000070427	Il18bp	67.3263	-1.17786	0.53093	-2.21849	0.0265218	0.269961
ENSMUSG00000046916	Myct1	218.797	-1.37916	0.622117	-2.21688	0.0266315	0.270898
ENSMUSG00000024953	Prdx5	1817.18	-0.662078	0.29873	-2.21631	0.0266705	0.271115
ENSMUSG00000027346	Gpcpd1	875.874	0.679221	0.30661	2.21526	0.0267422	0.271485
ENSMUSG00000071632	2510002D24Rik	333.044	-0.988384	0.446171	-2.21526	0.0267424	0.271485
ENSMUSG00000082078	Gm12098	19.3467	-1.9287	0.870771	-2.21494	0.0267644	0.271528
ENSMUSG00000020744	Slc25a19	410.074	-1.14371	0.516491	-2.21439	0.0268018	0.271598
ENSMUSG00000027520	Zdbf2	27.8109	2.00451	0.90525	2.21432	0.0268068	0.271598
ENSMUSG00000007594	Hapln4	37.8261	1.37899	0.623269	2.21251	0.0269312	0.272397
ENSMUSG00000024168	Tmem204	556.53	-0.872605	0.394426	-2.21234	0.0269431	0.272397
ENSMUSG00000032086	Bace1	1078.11	0.693645	0.313596	2.21191	0.0269729	0.272397
ENSMUSG00000033068	Entpd6	203.747	-1.35883	0.61433	-2.21189	0.0269746	0.272397
ENSMUSG00000038173	Enpp6	41.2659	-1.47425	0.666239	-2.21279	0.0269122	0.272397
ENSMUSG00000021908	Gm6768	21.5173	-3.16003	1.42975	-2.21019	0.0270917	0.27286
ENSMUSG00000026626	Ppp2r5a	2566.07	-1.44189	0.652349	-2.21031	0.027084	0.27286
ENSMUSG00000052837	Junb	890.16	0.700543	0.316928	2.21042	0.0270763	0.27286
ENSMUSG00000102562	Gm37694	208.549	-1.03668	0.468922	-2.21078	0.0270514	0.27286
ENSMUSG00000022270	Fam134b	1252.25	1.35578	0.613613	2.2095	0.02714	0.273076
ENSMUSG00000029557	Mrm2	102.976	-0.937664	0.424403	-2.20937	0.0271489	0.273076
ENSMUSG00000052544	St6galnac3	44.7574	-1.62503	0.735677	-2.20889	0.0271826	0.273236
ENSMUSG00000039298	Cdk5rap2	382.387	0.735258	0.333204	2.20663	0.0273401	0.274639
ENSMUSG00000035566	Pcdh17	172	-1.57981	0.7162	-2.20582	0.0273965	0.275025
ENSMUSG00000040918	Slc19a2	89.3072	1.17224	0.531551	2.20532	0.0274317	0.275198
ENSMUSG00000050335	Lgals3	1242.53	0.755203	0.342531	2.20478	0.0274699	0.275287
ENSMUSG00000053004	Hrh1	41.8537	-1.5432	0.699965	-2.20468	0.0274765	0.275287
ENSMUSG00000020163	Uqcr11	982.477	-0.677563	0.307533	-2.20322	0.027579	0.27584
ENSMUSG00000042029	Ncapg2	177.813	0.837416	0.380104	2.20313	0.0275858	0.27584
ENSMUSG00000046718	Bst2	488.972	-0.84748	0.384656	-2.20321	0.0275796	0.27584
ENSMUSG00000036256	Igfbp7	20183.3	-0.69227	0.314412	-2.20179	0.02768	0.276601
ENSMUSG00000030400	Ercc2	269.55	-0.757559	0.344236	-2.2007	0.0277573	0.277082
ENSMUSG00000089809	Rasgef1b	43.3541	1.38141	0.627742	2.2006	0.0277643	0.277082
ENSMUSG00000002565	Scin	66.3404	2.16342	0.983974	2.19866	0.0279023	0.27774
ENSMUSG00000006219	Fblim1	136.122	-1.50146	0.683053	-2.19815	0.0279382	0.27774
ENSMUSG00000015053	Gata2	189.386	-1.29062	0.586954	-2.19884	0.0278891	0.27774
ENSMUSG00000021238	Aldh6a1	1461.19	-1.74449	0.793514	-2.19844	0.0279176	0.27774
ENSMUSG00000051375	Pcdh1	735.765	-1.44511	0.657425	-2.19814	0.0279391	0.27774
ENSMUSG00000097756	A730056A06Rik	27.3227	1.52786	0.694746	2.19916	0.0278664	0.27774
ENSMUSG00000021281	Tnfaip2	270.809	0.767065	0.349047	2.1976	0.0279777	0.277796
ENSMUSG00000074024	4632427E13Rik	90.1639	-1.03869	0.472659	-2.19755	0.027981	0.277796
ENSMUSG00000022464	Slc38a4	130.178	1.27772	0.581996	2.19541	0.0281339	0.278649
ENSMUSG00000025735	Rhbdl1	38.627	-1.82787	0.83258	-2.19543	0.0281331	0.278649
ENSMUSG00000042333	Tnfrsf14	59.3043	-1.29991	0.591924	-2.19608	0.0280865	0.278649
ENSMUSG00000047415	Gpr68	42.3131	-1.64317	0.748482	-2.19533	0.0281397	0.278649
ENSMUSG00000038583	Pln	61.052	-1.79493	0.818099	-2.19403	0.0282334	0.279395
ENSMUSG00000005951	Shpk	138.852	-1.09395	0.498761	-2.19333	0.0282835	0.27946
ENSMUSG00000085028	Slc2a4rg-ps	100.569	-0.968291	0.441502	-2.19318	0.0282947	0.27946
ENSMUSG00000093930	Hmgcs1	1325.54	-1.63785	0.746752	-2.1933	0.0282857	0.27946
ENSMUSG00000031791	Tmem38a	961.918	1.86905	0.85232	2.19289	0.028315	0.279481
ENSMUSG00000038782	1700028J19Rik	26.0192	-2.17173	0.990467	-2.19263	0.0283337	0.279485
ENSMUSG00000020697	Lig3	386.667	0.720801	0.32899	2.19096	0.028455	0.280202
ENSMUSG00000036904	Fzd8	1216.26	1.13806	0.519456	2.19087	0.0284613	0.280202
ENSMUSG00000043873	Chil5	34.6724	-1.67971	0.766594	-2.19113	0.0284422	0.280202
ENSMUSG00000024451	Arap3	612.793	-1.26679	0.578664	-2.18917	0.0285845	0.281234
ENSMUSG00000026222	Sp100	341.35	-1.44142	0.658566	-2.18872	0.0286174	0.281377
ENSMUSG00000036655	Colec11	63.6051	-1.86942	0.854381	-2.18804	0.0286667	0.28168
ENSMUSG00000029648	Flt1	1262.5	-1.44351	0.660402	-2.1858	0.0288301	0.282748
ENSMUSG00000031605	Klhl2	521.986	-1.56324	0.715046	-2.18621	0.0288002	0.282748
ENSMUSG00000054793	Cadm4	467.845	-0.894579	0.40927	-2.18579	0.0288307	0.282748
ENSMUSG00000002227	Mov10	176.321	-1.1336	0.518933	-2.18447	0.0289274	0.283333
ENSMUSG00000063713	Klk1b24	69.3609	-2.28157	1.04435	-2.18468	0.0289122	0.283333
ENSMUSG00000018554	Ybx2	47.9546	-1.83258	0.839874	-2.18198	0.0291113	0.284253
ENSMUSG00000022074	Tnfrsf10b	180.508	-0.852643	0.390734	-2.18216	0.0290979	0.284253
ENSMUSG00000029570	Lfng	414.792	-1.35002	0.618653	-2.18219	0.0290959	0.284253
ENSMUSG00000055799	Tcf7l1	596.344	-0.905004	0.414673	-2.18245	0.0290761	0.284253
ENSMUSG00000061100	Retnla	369.004	-2.41453	1.10673	-2.18169	0.0291328	0.284253
ENSMUSG00000086105	Gm11636	14.7671	-2.31214	1.05977	-2.18175	0.0291281	0.284253
ENSMUSG00000001227	Sema6b	408.509	-1.4432	0.661612	-2.18133	0.0291589	0.284327
ENSMUSG00000000320	Alox12	634.815	1.12053	0.513911	2.1804	0.0292278	0.284818
ENSMUSG00000027800	Tm4sf1	1749.93	-0.652631	0.299446	-2.17946	0.0292976	0.285135
ENSMUSG00000083022	Rps15a-ps6	77.89	1.56765	0.719211	2.17968	0.0292812	0.285135
ENSMUSG00000029163	Emilin1	3236.98	1.18959	0.545941	2.17896	0.0293345	0.285312
ENSMUSG00000017446	C1qtnf1	1236.71	0.748534	0.343631	2.17831	0.0293832	0.285605
ENSMUSG00000032878	Ccdc85a	168.769	-1.60991	0.73965	-2.17659	0.0295115	0.286488
ENSMUSG00000053214	Gm9899	16.5981	-2.03454	0.934736	-2.17659	0.0295109	0.286488
ENSMUSG00000021950	Anxa8	1926.62	0.920963	0.423761	2.17331	0.0297572	0.288077
ENSMUSG00000024664	Fads3	1021.74	-1.10716	0.509415	-2.17339	0.0297509	0.288077
ENSMUSG00000025007	Aldh18a1	2281.04	1.07011	0.49231	2.17365	0.0297313	0.288077
ENSMUSG00000033715	Akr1c14	69.6313	-1.79512	0.826204	-2.17274	0.0298001	0.288077
ENSMUSG00000047988	4933428G20Rik	41.5995	-1.30271	0.599386	-2.17341	0.0297495	0.288077
ENSMUSG00000092981	Mir5125	60.7411	-1.12195	0.516393	-2.17267	0.0298054	0.288077
ENSMUSG00000103772	Gm36933	17.7909	-1.88345	0.86689	-2.17265	0.0298069	0.288077
ENSMUSG00000027984	Hadh	1217.11	-1.28114	0.589967	-2.17155	0.0298898	0.288608
ENSMUSG00000028132	Tmem56	506.68	1.22044	0.562049	2.17142	0.0298995	0.288608
ENSMUSG00000047617	Paxx	475.318	-1.13091	0.520913	-2.17102	0.0299299	0.288719
ENSMUSG00000021360	Gcnt2	327.739	-1.2913	0.595346	-2.16899	0.0300831	0.288963
ENSMUSG00000026688	Mgst3	356.214	-1.05827	0.487919	-2.16894	0.0300874	0.288963
ENSMUSG00000032372	Plscr2	46.9557	-1.40227	0.646403	-2.16935	0.0300561	0.288963
ENSMUSG00000033308	Dpyd	72.7221	-2.08659	0.961628	-2.16985	0.0300181	0.288963
ENSMUSG00000037110	Ralgapa2	383.041	-1.41697	0.653297	-2.16896	0.0300861	0.288963
ENSMUSG00000058488	Kl	26.6875	-2.38672	1.10002	-2.1697	0.0300298	0.288963
ENSMUSG00000092526	Gm17907	12.8876	-2.41309	1.11205	-2.16995	0.0300104	0.288963
ENSMUSG00000036218	Pdzrn4	122.061	1.18579	0.546854	2.16838	0.0301296	0.289187
ENSMUSG00000029864	Gstk1	159.871	-1.8324	0.845493	-2.16726	0.0302153	0.289647
ENSMUSG00000072949	Acot1	24.2332	1.65926	0.765527	2.16748	0.0301985	0.289647
ENSMUSG00000068036	Afdn	1626.22	-0.953808	0.44025	-2.16652	0.0302718	0.290007
ENSMUSG00000092014	Gm4468	27.7271	-1.48773	0.686808	-2.16616	0.0302993	0.290089
ENSMUSG00000039195	1110008P14Rik	326.197	-0.817779	0.377718	-2.16505	0.0303838	0.290716
ENSMUSG00000018381	Abi3	82.406	-1.40958	0.651417	-2.16386	0.0304748	0.291404
ENSMUSG00000081648	Gm13423	14.2695	-1.99594	0.92289	-2.16271	0.0305638	0.292073
ENSMUSG00000048758	Rpl29	2450.82	1.23581	0.571736	2.1615	0.0306568	0.292779
ENSMUSG00000049420	Tmem200a	31.6901	1.68437	0.779583	2.1606	0.0307264	0.293089
ENSMUSG00000073758	Sh3d21	156.344	-0.919309	0.425491	-2.16058	0.0307276	0.293089
ENSMUSG00000020368	Canx	4504.04	0.655596	0.303499	2.16013	0.0307626	0.293225
ENSMUSG00000025666	Tmem47	844.185	0.794402	0.367795	2.1599	0.0307801	0.293225
ENSMUSG00000029022	Miip	165.585	-0.814562	0.377342	-2.15868	0.0308748	0.293778
ENSMUSG00000035914	Cd276	961.476	1.19542	0.553833	2.15846	0.0308923	0.293778
ENSMUSG00000097487	Ptges3l	120.325	1.10632	0.512563	2.15841	0.0308958	0.293778
ENSMUSG00000022346	Myc	267.846	0.949132	0.439874	2.15774	0.0309484	0.294003
ENSMUSG00000053617	Sh3pxd2a	6094.42	-1.10036	0.509987	-2.15761	0.0309578	0.294003
ENSMUSG00000029685	Asb15	43.5162	1.55705	0.721838	2.15706	0.0310007	0.294228
ENSMUSG00000031024	St5	511.997	-0.725032	0.336183	-2.15666	0.0310323	0.294345
ENSMUSG00000039911	Spsb1	464.859	0.75594	0.350612	2.15606	0.0310792	0.294607
ENSMUSG00000020486	2020-09-04	408.801	-1.24088	0.575976	-2.15439	0.0312098	0.295268
ENSMUSG00000042401	Crtac1	14.0858	-2.4535	1.13895	-2.15418	0.031226	0.295268
ENSMUSG00000045569	Mc2r	39.8617	-2.92968	1.35994	-2.15427	0.031219	0.295268
ENSMUSG00000049691	Nkx3-2	23.8604	1.78909	0.830478	2.15429	0.0312174	0.295268
ENSMUSG00000020901	Pik3r5	125.545	0.975971	0.453139	2.1538	0.0312557	0.295367
ENSMUSG00000062070	Pgk1	3067.18	0.809499	0.375938	2.15328	0.0312966	0.29557
ENSMUSG00000095224	F930015N05Rik	19.0438	2.02411	0.940166	2.15293	0.0313241	0.295648
ENSMUSG00000037996	Slc24a2	63.2123	1.15492	0.53655	2.1525	0.031358	0.295694
ENSMUSG00000063063	Ctnna2	18.2851	1.9526	0.907185	2.15238	0.0313676	0.295694
ENSMUSG00000034903	Cobll1	426.277	-0.816087	0.379267	-2.15175	0.0314174	0.295799
ENSMUSG00000058914	C1qtnf3	2244.34	1.91406	0.889486	2.15187	0.0314073	0.295799
ENSMUSG00000085071	Gm14066	161.178	1.4493	0.673836	2.15081	0.0314908	0.29607
ENSMUSG00000095115	Itpripl2	3698.9	0.677421	0.314985	2.15065	0.0315042	0.29607
ENSMUSG00000098132	Rassf10	40.1587	-1.71081	0.79538	-2.15093	0.0314815	0.29607
ENSMUSG00000020777	Acox1	1901.83	-1.48426	0.690231	-2.15039	0.0315247	0.29608
ENSMUSG00000056492	Adgrf5	2198.94	-1.53657	0.714926	-2.14927	0.0316126	0.296724
ENSMUSG00000097908	4933404O12Rik	71.6094	1.03824	0.483313	2.14817	0.0317	0.29718
ENSMUSG00000106751	Gm42467	16.4967	-1.86158	0.866561	-2.14824	0.0316947	0.29718
ENSMUSG00000019966	Kitl	717.292	-1.41596	0.659384	-2.1474	0.0317613	0.297445
ENSMUSG00000031636	Pdlim3	450.456	1.58018	0.735881	2.14733	0.0317671	0.297445
ENSMUSG00000036533	Cdc42ep3	480.864	0.853428	0.397553	2.1467	0.0318168	0.297567
ENSMUSG00000067787	Blcap	817.726	-1.29405	0.602814	-2.14668	0.031819	0.297567
ENSMUSG00000029352	Crybb3	33.5885	-1.40767	0.65596	-2.14596	0.0318759	0.297917
ENSMUSG00000070780	Rbm47	142.039	-2.10885	0.983232	-2.14481	0.031968	0.298595
ENSMUSG00000022139	Mbnl2	3349.71	0.718363	0.334983	2.14447	0.0319949	0.298664
ENSMUSG00000022948	Setd4	59.1273	-1.07831	0.50358	-2.14128	0.0322513	0.300326
ENSMUSG00000074577	Ripor3	167.25	-0.803472	0.375204	-2.14143	0.0322395	0.300326
ENSMUSG00000097048	1600020E01Rik	100.502	-0.932392	0.435413	-2.1414	0.0322421	0.300326
ENSMUSG00000097812	Gm26812	14.7263	-2.05548	0.959897	-2.14135	0.0322458	0.300326
ENSMUSG00000025732	Mcrip2	143.528	-1.34339	0.627808	-2.13981	0.03237	0.300799
ENSMUSG00000028551	Cdkn2c	670.307	-1.40726	0.657698	-2.13968	0.0323807	0.300799
ENSMUSG00000029669	Tspan12	541.373	-1.68535	0.787507	-2.14011	0.0323461	0.300799
ENSMUSG00000048355	Arxes1	99.9406	-1.45219	0.678682	-2.13972	0.0323773	0.300799
ENSMUSG00000039377	Hlx	329.514	-0.897114	0.419356	-2.13926	0.0324143	0.300928
ENSMUSG00000037306	Man1c1	1700.95	0.834719	0.390354	2.13836	0.0324873	0.301423
ENSMUSG00000030695	Aldoa	17192.7	1.0698	0.500719	2.13653	0.032636	0.302619
ENSMUSG00000021365	Nedd9	717.083	0.835609	0.39126	2.13569	0.0327049	0.302897
ENSMUSG00000056648	Hoxb8	51.7208	-1.46288	0.685043	-2.13546	0.0327237	0.302897
ENSMUSG00000072944	Nup62cl	16.1842	2.06056	0.964935	2.13544	0.0327253	0.302897
ENSMUSG00000032754	Slc8b1	731.872	-0.678351	0.317786	-2.13462	0.0327924	0.303335
ENSMUSG00000030411	Nova2	133.399	-1.31452	0.615915	-2.13425	0.0328224	0.303429
ENSMUSG00000022231	Sema5a	452.576	-1.46743	0.687691	-2.13385	0.0328549	0.303546
ENSMUSG00000028412	Slc44a1	1833.6	0.616102	0.288913	2.13248	0.0329671	0.304399
ENSMUSG00000005089	Slc1a2	163.778	1.00415	0.471222	2.13094	0.033094	0.30476
ENSMUSG00000025350	Rdh5	140.729	-0.847664	0.397996	-2.12983	0.0331854	0.30476
ENSMUSG00000030701	Plekhb1	204.544	-0.775427	0.363869	-2.13106	0.033084	0.30476
ENSMUSG00000032125	Robo4	521.665	-1.48449	0.696813	-2.13039	0.033139	0.30476
ENSMUSG00000038702	Dsel	990.733	0.901681	0.423278	2.13023	0.0331524	0.30476
ENSMUSG00000039410	Prdm16	164.618	-1.33673	0.627232	-2.13116	0.0330758	0.30476
ENSMUSG00000041688	Amot	228.98	0.960945	0.451178	2.12986	0.0331834	0.30476
ENSMUSG00000048450	Msx1	177.216	-0.921961	0.432818	-2.13013	0.0331605	0.30476
ENSMUSG00000104346	Pcdhga3	55.5936	1.15511	0.541878	2.13168	0.0330334	0.30476
ENSMUSG00000020156	Mum1	828.702	-0.739468	0.347401	-2.12857	0.0332899	0.305147
ENSMUSG00000020178	Adora2a	69.0198	-1.75243	0.823229	-2.12873	0.0332766	0.305147
ENSMUSG00000038618	Rassf7	101.815	-1.31334	0.617009	-2.12856	0.0332907	0.305147
ENSMUSG00000046229	Scand1	773.109	-0.724595	0.340448	-2.12836	0.0333072	0.305147
ENSMUSG00000085622	3110056K07Rik	60.107	-1.09538	0.514878	-2.12746	0.0333819	0.305648
ENSMUSG00000042097	Zfp239	23.6243	1.60988	0.757289	2.12585	0.033516	0.306692
ENSMUSG00000040254	Sema3d	2251.19	1.4693	0.69134	2.1253	0.0335619	0.306825
ENSMUSG00000040883	Tmem205	360.99	-0.868719	0.408772	-2.12519	0.0335706	0.306825
ENSMUSG00000020638	Cmpk2	114.294	-1.46759	0.690773	-2.12455	0.0336238	0.307128
ENSMUSG00000085636	Gm11769	32.9624	-1.46843	0.691328	-2.12407	0.0336644	0.307315
ENSMUSG00000032609	Klhdc8b	248.798	-0.932486	0.439127	-2.1235	0.0337119	0.307566
ENSMUSG00000025403	Shmt2	1501.61	0.886265	0.417499	2.1228	0.033771	0.307921
ENSMUSG00000022377	Asap1	1643.78	0.662681	0.312419	2.12113	0.0339111	0.308832
ENSMUSG00000040856	Dlk1	557.263	-1.27163	0.59948	-2.12122	0.0339029	0.308832
ENSMUSG00000022199	Slc22a17	720.934	-0.893266	0.421483	-2.11934	0.0340619	0.309651
ENSMUSG00000024697	Gna14	32.593	-1.70843	0.80604	-2.11954	0.0340452	0.309651
ENSMUSG00000030834	Abcc6	13.4285	-2.67671	1.26272	-2.11979	0.0340239	0.309651
ENSMUSG00000070371	Prss36	143.335	-0.912874	0.430795	-2.11904	0.0340868	0.309694
ENSMUSG00000087128	Gm12655	62.2419	1.0939	0.516706	2.11706	0.0342545	0.310849
ENSMUSG00000105201	Gm43362	36.0386	-1.47667	0.697439	-2.11727	0.034237	0.310849
ENSMUSG00000100131	Gm28439	57.4208	-1.13056	0.534292	-2.116	0.0343448	0.311484
ENSMUSG00000025465	Echs1	942.947	-1.25773	0.594692	-2.11493	0.0344356	0.312122
ENSMUSG00000000305	Cdh4	72.8309	1.72398	0.815313	2.1145	0.0344726	0.312273
ENSMUSG00000030539	Sema4b	188.716	-1.43727	0.680059	-2.11345	0.0345621	0.312898
ENSMUSG00000024940	Ltbp3	8282.33	0.77066	0.365156	2.1105	0.0348157	0.315008
ENSMUSG00000103984	Gm37447	13.9421	-2.0615	0.977255	-2.10948	0.0349031	0.315612
ENSMUSG00000032186	Tmod2	491.491	0.764878	0.362801	2.10825	0.035009	0.316383
ENSMUSG00000003420	Fcgrt	3601.07	-0.629006	0.298628	-2.10632	0.0351763	0.316587
ENSMUSG00000006221	Hspb7	622.457	1.18914	0.564541	2.10638	0.0351714	0.316587
ENSMUSG00000020538	Srebf1	2576.79	-1.19523	0.567139	-2.10748	0.0350764	0.316587
ENSMUSG00000024359	Hspa9	3300.4	0.832859	0.395261	2.10711	0.035108	0.316587
ENSMUSG00000044197	Gpr146	429.531	-1.20309	0.570802	-2.10772	0.0350551	0.316587
ENSMUSG00000073805	Fam196a	67.8281	-1.14038	0.541326	-2.10664	0.0351485	0.316587
ENSMUSG00000105748	Gm43088	24.6546	-1.80315	0.856026	-2.10642	0.0351678	0.316587
ENSMUSG00000036676	Tmtc3	462.601	0.667958	0.317271	2.10533	0.0352629	0.317177
ENSMUSG00000043313	Pcdhb19	82.2651	0.977962	0.46457	2.10509	0.0352833	0.317177
ENSMUSG00000097750	Gm4673	306.541	-0.7339	0.348724	-2.10453	0.0353325	0.317432
ENSMUSG00000099137	Gm10603	36.8635	-1.36579	0.649157	-2.10395	0.035383	0.3177
ENSMUSG00000022194	Pabpn1	1036.21	-0.635114	0.301928	-2.10353	0.0354195	0.317841
ENSMUSG00000000876	Pxmp4	565.781	-0.932633	0.443541	-2.1027	0.0354924	0.318153
ENSMUSG00000035049	Rrp12	181.701	0.837501	0.398351	2.10242	0.0355166	0.318153
ENSMUSG00000053411	Cbx7	186.003	-0.970763	0.461707	-2.10255	0.0355051	0.318153
ENSMUSG00000038205	Prkab2	426.911	1.03836	0.49395	2.10215	0.0355402	0.318179
ENSMUSG00000031209	Heph	361.637	-1.71181	0.814526	-2.10161	0.0355877	0.318232
ENSMUSG00000049091	Sephs2	284.781	-1.22247	0.581652	-2.10172	0.0355775	0.318232
ENSMUSG00000026073	Il1r2	17.6665	-2.14566	1.02136	-2.10079	0.0356591	0.318312
ENSMUSG00000042529	Kcnj12	49.4604	1.15243	0.548495	2.10107	0.0356346	0.318312
ENSMUSG00000106772	Gm43794	15.6046	-1.8726	0.891338	-2.10088	0.0356514	0.318312
ENSMUSG00000032392	Parp16	193.683	-0.804933	0.383242	-2.10033	0.0357002	0.318493
ENSMUSG00000046794	Ppp1r3b	79.2355	-1.36666	0.650877	-2.09973	0.0357527	0.318776
ENSMUSG00000104394	Gm37254	35.7029	-1.39524	0.66467	-2.09914	0.0358044	0.319051
ENSMUSG00000031555	Adam9	1636.64	0.739622	0.35247	2.0984	0.0358698	0.319448
ENSMUSG00000020758	Itgb4	544.609	-1.05918	0.505093	-2.09699	0.035994	0.320368
ENSMUSG00000024593	Megf10	50.4573	1.35065	0.644492	2.09569	0.0361101	0.320842
ENSMUSG00000085282	Gm15663	45.0879	1.38674	0.661705	2.09571	0.0361078	0.320842
ENSMUSG00000111488	Gm31378	22.9409	-1.94373	0.927306	-2.09611	0.0360727	0.320842
ENSMUSG00000030536	Iqgap1	5525.66	0.749594	0.35777	2.09518	0.0361548	0.321052
ENSMUSG00000029994	Anxa4	2385.13	0.841609	0.401792	2.09464	0.036203	0.321294
ENSMUSG00000014704	Hoxa2	25.9352	-1.49305	0.713189	-2.09348	0.0363061	0.321607
ENSMUSG00000026430	Rassf5	162.301	0.928604	0.443584	2.09341	0.0363125	0.321607
ENSMUSG00000028300	3110043O21Rik	467.955	-1.58007	0.754628	-2.09384	0.0362741	0.321607
ENSMUSG00000057706	Mex3b	150.12	0.941309	0.449677	2.0933	0.0363224	0.321607
ENSMUSG00000022574	Naprt	188.122	-0.771294	0.368767	-2.09155	0.0364788	0.322782
ENSMUSG00000031637	Lrp2bp	27.7239	1.69643	0.811167	2.09134	0.0364972	0.322782
ENSMUSG00000024134	Six2	79.2186	1.33868	0.640181	2.09109	0.0365196	0.322794
ENSMUSG00000063458	Lrmda	31.1159	-1.45958	0.698177	-2.09056	0.0365672	0.323028
ENSMUSG00000038267	Slc22a23	212.77	-1.29243	0.618484	-2.08968	0.0366467	0.323543
ENSMUSG00000020023	Tmcc3	891.322	-1.60092	0.76643	-2.0888	0.0367261	0.323673
ENSMUSG00000024420	Zfp521	1695.11	1.00667	0.482062	2.08826	0.036774	0.323673
ENSMUSG00000030465	Psd3	975.521	0.780499	0.373582	2.08923	0.0366869	0.323673
ENSMUSG00000037999	Arap2	126.853	-1.54876	0.741535	-2.08859	0.0367448	0.323673
ENSMUSG00000060519	Tor3a	580.546	0.651294	0.311942	2.08787	0.0368093	0.323673
ENSMUSG00000066607	6030419C18Rik	489.318	0.947541	0.4538	2.08802	0.0367965	0.323673
ENSMUSG00000097472	Gm26586	38.9119	-1.27832	0.612137	-2.0883	0.0367711	0.323673
ENSMUSG00000026971	Itgb6	27.0596	2.67943	1.28356	2.0875	0.036843	0.323783
ENSMUSG00000035835	Plppr3	125.47	-1.27846	0.612768	-2.08637	0.0369451	0.324494
ENSMUSG00000074736	Syndig1	43.5505	1.94454	0.932724	2.08479	0.0370881	0.325563
ENSMUSG00000072720	Myo18b	436.667	2.32744	1.11671	2.0842	0.0371417	0.325847
ENSMUSG00000035944	Ttc38	165.458	-0.819789	0.393394	-2.08389	0.0371705	0.325912
ENSMUSG00000003184	Irf3	683.483	-0.642698	0.30846	-2.08357	0.037199	0.325976
ENSMUSG00000020150	Gamt	266.747	-0.79147	0.380016	-2.08273	0.0372759	0.326224
ENSMUSG00000024112	Cacna1h	39.5688	-1.21567	0.583739	-2.08256	0.0372912	0.326224
ENSMUSG00000103822	6030460B20Rik	13.3228	-1.99191	0.956385	-2.08275	0.0372737	0.326224
ENSMUSG00000001027	Scn4a	226.166	2.43848	1.17135	2.08177	0.0373636	0.32667
ENSMUSG00000021097	Clmn	484.945	-0.769219	0.369697	-2.08067	0.0374639	0.326802
ENSMUSG00000028393	Alad	429.657	-0.91923	0.441795	-2.08067	0.0374641	0.326802
ENSMUSG00000070737	Tmem35b	72.2085	-0.980995	0.471462	-2.08075	0.0374566	0.326802
ENSMUSG00000104973	A530041M06Rik	20.2022	-1.80461	0.867057	-2.08131	0.0374056	0.326802
ENSMUSG00000023960	Enpp5	418.294	-1.27589	0.613533	-2.07958	0.0375643	0.327303
ENSMUSG00000045392	Olfr1033	24.9125	-2.42552	1.16633	-2.07962	0.0375607	0.327303
ENSMUSG00000038893	Fam117a	265.414	-0.886463	0.426422	-2.07884	0.0376322	0.327708
ENSMUSG00000044548	Dact1	277.357	0.768194	0.369596	2.07847	0.0376663	0.327819
ENSMUSG00000034220	Gpc1	3151.28	1.26226	0.607561	2.07759	0.0377473	0.327971
ENSMUSG00000034842	Art3	608.87	-1.54569	0.743909	-2.0778	0.037728	0.327971
ENSMUSG00000054263	Lifr	1006.41	-0.939833	0.452369	-2.07758	0.037748	0.327971
ENSMUSG00000027314	Dll4	210.143	-1.40467	0.67666	-2.07589	0.0379037	0.329137
ENSMUSG00000017831	Rab5a	1037.75	0.616299	0.29695	2.07543	0.037947	0.329326
ENSMUSG00000034617	Mtrr	178.963	0.828904	0.399465	2.07504	0.0379832	0.329454
ENSMUSG00000031885	Cbfb	1379.18	0.74986	0.361622	2.0736	0.0381162	0.329487
ENSMUSG00000034462	Pkd2	7836.95	0.959412	0.462594	2.07398	0.0380811	0.329487
ENSMUSG00000034687	Fras1	110.155	1.38529	0.66806	2.07361	0.0381158	0.329487
ENSMUSG00000070315	4930581F22Rik	80.6209	-0.966372	0.465811	-2.0746	0.0380237	0.329487
ENSMUSG00000104852	Gm43201	15.4798	-2.00082	0.964505	-2.07446	0.0380369	0.329487
ENSMUSG00000109314	Gm44699	16.7807	-1.89902	0.915588	-2.0741	0.0380703	0.329487
ENSMUSG00000018740	Slc25a35	140.215	-1.1706	0.56475	-2.07277	0.0381938	0.329869
ENSMUSG00000022094	Slc39a14	1299.8	0.895077	0.431878	2.07252	0.0382169	0.329869
ENSMUSG00000022687	Boc	3730.59	1.20807	0.582928	2.07242	0.0382262	0.329869
ENSMUSG00000025809	Itgb1	13222.1	0.686461	0.331345	2.07174	0.0382897	0.329869
ENSMUSG00000084978	Gm11655	19.9887	-1.80074	0.869118	-2.07192	0.0382727	0.329869
ENSMUSG00000103657	Gm37204	19.9887	-1.80074	0.869118	-2.07192	0.0382727	0.329869
ENSMUSG00000038387	Rras	1682.09	-0.6649	0.320995	-2.07138	0.0383237	0.329976
ENSMUSG00000051910	Sox6	529.015	0.749939	0.362266	2.07014	0.0384396	0.330788
ENSMUSG00000087201	Gm15261	13.8364	-2.19082	1.05889	-2.06899	0.038547	0.331526
ENSMUSG00000033088	Triobp	777.553	-0.69936	0.338133	-2.0683	0.038612	0.331539
ENSMUSG00000038235	F11r	490.048	-1.20894	0.584458	-2.06847	0.0385955	0.331539
ENSMUSG00000050295	Foxc1	452.327	1.00634	0.486557	2.06828	0.0386135	0.331539
ENSMUSG00000016534	Lamp2	4695.28	0.609341	0.295076	2.06503	0.0389199	0.332066
ENSMUSG00000017493	Igfbp4	15867.8	0.677064	0.327946	2.06456	0.0389648	0.332066
ENSMUSG00000019817	Plagl1	879.218	0.823112	0.398347	2.06632	0.0387982	0.332066
ENSMUSG00000025129	Ppp1r27	33.9802	1.95854	0.948735	2.06437	0.0389824	0.332066
ENSMUSG00000025494	Sigirr	81.9457	-1.35691	0.657062	-2.06512	0.038912	0.332066
ENSMUSG00000030406	Gipr	29.098	-2.419	1.17156	-2.06476	0.0389454	0.332066
ENSMUSG00000033161	Atp1a1	5201.46	0.737082	0.356946	2.06497	0.0389262	0.332066
ENSMUSG00000043207	Zmpste24	979.078	0.669672	0.324243	2.06534	0.0388908	0.332066
ENSMUSG00000048004	Tmem196	13.5617	2.10265	1.01816	2.06515	0.0389086	0.332066
ENSMUSG00000054426	A930005H10Rik	90.5067	-1.07488	0.520535	-2.06495	0.0389282	0.332066
ENSMUSG00000055370	Gm9968	14.2546	-2.09633	1.01514	-2.06507	0.0389166	0.332066
ENSMUSG00000059991	Nptx2	21.6453	2.38844	1.15721	2.06396	0.0390219	0.332066
ENSMUSG00000066058	Cldn19	65.9505	-1.18613	0.573744	-2.06736	0.0387004	0.332066
ENSMUSG00000072568	Fam84b	184.756	-1.38808	0.671908	-2.06588	0.0388395	0.332066
ENSMUSG00000072763	5430403G16Rik	16.7715	2.16701	1.04964	2.06452	0.0389682	0.332066
ENSMUSG00000096929	A330023F24Rik	101.502	-0.93683	0.453899	-2.06396	0.0390214	0.332066
ENSMUSG00000049791	Fzd4	2857.72	-1.41863	0.687813	-2.06252	0.0391586	0.333044
ENSMUSG00000038642	Ctss	596.065	0.79312	0.384652	2.06191	0.0392159	0.333161
ENSMUSG00000040351	Ankib1	652.722	0.652125	0.316266	2.06195	0.0392126	0.333161
ENSMUSG00000029306	Ibsp	2110.66	2.17645	1.05647	2.06011	0.0393882	0.334439
ENSMUSG00000032841	Prr5l	68.7848	-1.51389	0.734993	-2.05973	0.0394245	0.334562
ENSMUSG00000045064	Zc2hc1c	73.496	1.1409	0.554142	2.05886	0.0395077	0.335082
ENSMUSG00000079108	Srp54b	443.641	0.685831	0.333245	2.05804	0.0395863	0.335563
ENSMUSG00000024511	Rab27b	154.144	1.07353	0.521685	2.05781	0.0396086	0.335567
ENSMUSG00000031825	Crispld2	11608.8	1.35337	0.657759	2.05755	0.039633	0.335587
ENSMUSG00000007682	Dio2	240.565	0.926676	0.450547	2.05678	0.0397075	0.335883
ENSMUSG00000062908	Acadm	1381.88	-1.34013	0.651583	-2.05673	0.0397118	0.335883
ENSMUSG00000023959	Clic5	897.335	0.636202	0.309369	2.05645	0.0397395	0.335932
ENSMUSG00000050953	Gja1	5787.1	1.07251	0.521712	2.05576	0.0398059	0.336307
ENSMUSG00000050493	Fam167b	50.3073	-1.50456	0.732136	-2.05502	0.0398766	0.336719
ENSMUSG00000090260	2810442N19Rik	22.7851	-2.02045	0.983724	-2.05388	0.0399871	0.337466
ENSMUSG00000003531	Dgcr6	460.824	-0.667923	0.325343	-2.05298	0.0400747	0.338018
ENSMUSG00000028601	Echdc2	465.776	-0.7987	0.389342	-2.05141	0.0402268	0.338757
ENSMUSG00000031883	Car7	37.9557	-1.45554	0.709418	-2.05174	0.040195	0.338757
ENSMUSG00000051379	Flrt3	115.61	0.991562	0.483382	2.0513	0.0402377	0.338757
ENSMUSG00000104273	A530064N14Rik	24.8215	-1.57384	0.767292	-2.05117	0.0402507	0.338757
ENSMUSG00000019802	Sec63	1941.99	0.639585	0.31187	2.0508	0.0402862	0.338812
ENSMUSG00000046280	She	295.215	-1.10061	0.536713	-2.05064	0.0403016	0.338812
ENSMUSG00000026621	2020-03-01	30.894	-1.88801	0.921139	-2.04964	0.0403992	0.339446
ENSMUSG00000026765	Lypd6b	29.6788	2.33362	1.13894	2.04894	0.040468	0.339773
ENSMUSG00000051703	Tmem198	102.509	-1.12226	0.547766	-2.04879	0.0404825	0.339773
ENSMUSG00000029335	Bmp3	715.84	-1.22271	0.596875	-2.04851	0.0405097	0.339816
ENSMUSG00000027397	Slc20a1	538.437	0.778761	0.380246	2.04805	0.0405555	0.340013
ENSMUSG00000023007	Prpf40b	525.804	-0.638133	0.311669	-2.04747	0.0406122	0.340116
ENSMUSG00000097242	Gm16907	187.313	-0.884971	0.432209	-2.04755	0.040604	0.340116
ENSMUSG00000063895	Nupl1	283.073	0.739018	0.36119	2.04606	0.0407503	0.341086
ENSMUSG00000074280	Gm6166	55.6219	-1.78265	0.871784	-2.04483	0.040872	0.341731
ENSMUSG00000111434	Gm47121	16.6456	-1.80098	0.880746	-2.04483	0.0408712	0.341731
ENSMUSG00000039787	Cercam	4602.51	-0.931318	0.455515	-2.04454	0.0409002	0.34178
ENSMUSG00000030091	Nup210	67.1395	1.01773	0.498107	2.04319	0.0410338	0.342531
ENSMUSG00000085069	Gm13111	31.8042	-1.92945	0.94434	-2.04318	0.0410348	0.342531
ENSMUSG00000043683	Fem1a	847.006	0.696458	0.340944	2.04274	0.0410785	0.342709
ENSMUSG00000020277	Pfkl	976.216	-1.12086	0.548924	-2.04191	0.0411601	0.343016
ENSMUSG00000045875	Adra1a	16.9982	-2.07723	1.01719	-2.04213	0.0411388	0.343016
ENSMUSG00000027429	Sec23b	638.476	0.663009	0.324863	2.04088	0.0412623	0.343626
ENSMUSG00000045246	Kcng4	57.1454	1.72161	0.843629	2.04072	0.0412782	0.343626
ENSMUSG00000026356	Dars	726.46	0.623888	0.305818	2.04006	0.0413439	0.343986
ENSMUSG00000032577	Mapkapk3	176.772	0.762749	0.373955	2.03968	0.041382	0.344019
ENSMUSG00000040118	Cacna2d1	1812.9	1.14949	0.563592	2.03957	0.0413928	0.344019
ENSMUSG00000020821	Kif1c	9727.38	-0.596971	0.292729	-2.03933	0.0414171	0.344034
ENSMUSG00000053964	Lgals4	112.825	-1.23026	0.603896	-2.0372	0.0416297	0.345612
ENSMUSG00000037972	Snn	285.549	-1.31657	0.646474	-2.03654	0.0416962	0.345977
ENSMUSG00000034584	Exph5	22.1857	1.83594	0.902512	2.03425	0.0419261	0.347696
ENSMUSG00000027187	Cat	2116.09	-1.36009	0.668909	-2.0333	0.0420221	0.348303
ENSMUSG00000021108	Prkch	351.589	-1.44005	0.708384	-2.03287	0.042066	0.348318
ENSMUSG00000035441	Myo1d	3282.37	1.17504	0.578094	2.03261	0.0420921	0.348318
ENSMUSG00000107168	Gm42507	19.7092	-1.62828	0.801058	-2.03266	0.0420865	0.348318
ENSMUSG00000023919	Cenpq	51.3225	1.18675	0.583923	2.03237	0.0421159	0.348327
ENSMUSG00000006641	Slc5a6	192.531	-1.07472	0.52889	-2.03203	0.0421509	0.348428
ENSMUSG00000021913	Ogdhl	18.2817	1.69065	0.832153	2.03165	0.0421886	0.348504
ENSMUSG00000072770	Acrbp	77.8872	-1.02406	0.504093	-2.03149	0.0422057	0.348504
ENSMUSG00000031647	Mfap3l	100.897	1.01218	0.498365	2.031	0.0422549	0.348722
ENSMUSG00000028631	Kcnq4	369.192	-0.876354	0.431607	-2.03044	0.0423116	0.349002
ENSMUSG00000039765	Cc2d2a	710.186	0.919844	0.453302	2.02921	0.0424374	0.349852
ENSMUSG00000052133	Sema5b	49.2429	-1.65826	0.817335	-2.02886	0.0424727	0.349954
ENSMUSG00000073481	2020-03-02	904.921	-0.933104	0.460086	-2.02811	0.0425492	0.350396
ENSMUSG00000053093	Myh7	126.444	-1.49867	0.739043	-2.02785	0.0425754	0.350423
ENSMUSG00000001552	Jup	1221.92	-0.727722	0.359014	-2.027	0.0426625	0.350655
ENSMUSG00000023992	Trem2	142.832	0.876809	0.432523	2.02719	0.0426426	0.350655
ENSMUSG00000032402	Smad3	1621.54	0.913325	0.450601	2.0269	0.0426723	0.350655
ENSMUSG00000085558	4930412C18Rik	40.3934	-1.4766	0.728593	-2.02665	0.0426981	0.350679
ENSMUSG00000019278	Dpep1	303.22	-1.55315	0.766999	-2.02497	0.0428709	0.350993
ENSMUSG00000024998	Plce1	1217.02	0.645916	0.31905	2.0245	0.0429187	0.350993
ENSMUSG00000025150	Cbr2	721.786	-0.676417	0.334372	-2.02295	0.0430788	0.350993
ENSMUSG00000025582	Nptx1	112.479	1.21874	0.602478	2.02288	0.0430857	0.350993
ENSMUSG00000026932	Nacc2	1276.81	-0.657349	0.324985	-2.02271	0.0431032	0.350993
ENSMUSG00000028164	Manba	525.163	0.730594	0.360958	2.02404	0.0429659	0.350993
ENSMUSG00000028751	Pla2g2e	24.1153	1.51733	0.749577	2.02425	0.0429444	0.350993
ENSMUSG00000028980	H6pd	1092.67	-1.08181	0.53428	-2.02479	0.0428885	0.350993
ENSMUSG00000031672	Got2	1166.22	0.798633	0.394673	2.02353	0.0430183	0.350993
ENSMUSG00000042625	Safb2	1619.24	-0.638107	0.315057	-2.02537	0.0428292	0.350993
ENSMUSG00000054676	1600014C10Rik	654.762	-1.07833	0.53296	-2.02329	0.0430429	0.350993
ENSMUSG00000056313	Tcim	413.947	-1.36726	0.67554	-2.02396	0.0429746	0.350993
ENSMUSG00000075478	Slitrk1	38.242	1.40233	0.693058	2.0234	0.0430323	0.350993
ENSMUSG00000084917	Gm17477	16.3694	-1.94494	0.961401	-2.02302	0.0430707	0.350993
ENSMUSG00000091509	Gm17066	179.576	-0.858861	0.424245	-2.02445	0.0429243	0.350993
ENSMUSG00000097462	9530026P05Rik	22.6794	-1.48456	0.733026	-2.02525	0.0428419	0.350993
ENSMUSG00000011884	Gltp	1077.08	-0.605757	0.299783	-2.02065	0.0433161	0.352539
ENSMUSG00000023052	Npff	42.505	-1.14495	0.566757	-2.02017	0.0433656	0.352755
ENSMUSG00000001918	Slc1a5	6017.92	-1.08196	0.535733	-2.01959	0.0434254	0.353046
ENSMUSG00000044528	Tram1l1	38.4327	1.46455	0.725245	2.01938	0.0434476	0.353046
ENSMUSG00000035941	Ibtk	1073.23	0.726179	0.359654	2.0191	0.0434765	0.353094
ENSMUSG00000038331	Satb2	43.8077	1.21671	0.602824	2.01835	0.0435547	0.353541
ENSMUSG00000097707	Gm26742	17.9609	-2.28255	1.13116	-2.01788	0.0436034	0.353749
ENSMUSG00000037709	Fam13a	331.527	-1.66579	0.825664	-2.01752	0.0436412	0.353868
ENSMUSG00000031010	Usp9x	1671.34	0.639737	0.317183	2.01693	0.0437026	0.354179
ENSMUSG00000034868	Myl12b	1606.18	-0.619218	0.307072	-2.01652	0.0437454	0.354338
ENSMUSG00000096146	Kcnj11	86.522	2.33088	1.15626	2.01589	0.043812	0.354689
ENSMUSG00000052854	Nrk	369.297	1.06068	0.526274	2.01545	0.0438573	0.354869
ENSMUSG00000047746	Fbxo40	195.914	2.58613	1.28375	2.0145	0.0439567	0.355485
ENSMUSG00000023977	Ubr2	1669.51	0.593457	0.294748	2.01344	0.0440688	0.355848
ENSMUSG00000040888	Gfer	171.401	-0.833516	0.414027	-2.01319	0.0440945	0.355848
ENSMUSG00000054404	Slfn5	1988.39	-1.35694	0.674007	-2.01324	0.0440892	0.355848
ENSMUSG00000073802	Cdkn2b	35.6907	-2.68808	1.33511	-2.01337	0.0440758	0.355848
ENSMUSG00000001630	Stk38l	730	0.809859	0.402458	2.01228	0.0441903	0.356433
ENSMUSG00000025429	Pstpip2	82.5392	1.01873	0.50633	2.01199	0.0442214	0.356496
ENSMUSG00000030654	Arl6ip1	1005.46	-0.858619	0.427174	-2.01	0.0444317	0.357975
ENSMUSG00000038168	P3h2	1932.04	1.0269	0.510943	2.00981	0.0444516	0.357975
ENSMUSG00000030739	Myh14	75.5893	1.2181	0.606175	2.00949	0.0444849	0.358054
ENSMUSG00000028591	Pramef12	20.4326	1.58143	0.787811	2.00737	0.0447105	0.358738
ENSMUSG00000041361	Myzap	252.11	-0.738143	0.367613	-2.00794	0.0446501	0.358738
ENSMUSG00000046442	Ppm1e	36.2587	-1.24612	0.62052	-2.00819	0.0446233	0.358738
ENSMUSG00000071398	2410004P03Rik	13.0869	2.05485	1.02324	2.00819	0.0446232	0.358738
ENSMUSG00000073787	Gm10575	107.865	-0.946518	0.471476	-2.00757	0.0446894	0.358738
ENSMUSG00000073910	Mob3b	97.687	-0.859719	0.428222	-2.00765	0.0446807	0.358738
ENSMUSG00000033096	Apmap	760.783	-1.28928	0.642526	-2.00658	0.0447947	0.359185
ENSMUSG00000095098	Ccdc85b	775.403	-0.724702	0.361194	-2.0064	0.0448131	0.359185
ENSMUSG00000016028	Celsr1	58.3965	-1.03449	0.515742	-2.00583	0.0448745	0.359489
ENSMUSG00000109674	Gm45470	18.6898	-2.90799	1.44999	-2.00553	0.0449068	0.35956
ENSMUSG00000029162	Khk	173.102	-0.89404	0.445922	-2.00492	0.0449711	0.359698
ENSMUSG00000050002	Idnk	188.749	-0.85656	0.427192	-2.00509	0.0449529	0.359698
ENSMUSG00000041650	Pcca	493.226	-1.37227	0.685043	-2.00319	0.0451565	0.360993
ENSMUSG00000042726	Trafd1	1090.95	-0.615768	0.308062	-1.99884	0.0456251	0.364549
ENSMUSG00000022587	Ly6e	3057	-1.08389	0.542335	-1.99856	0.0456554	0.364601
ENSMUSG00000002341	Ncan	29.255	-2.69901	1.35125	-1.99742	0.04578	0.365215
ENSMUSG00000029298	Gbp9	277.811	-1.44554	0.723637	-1.9976	0.0457602	0.365215
ENSMUSG00000028763	Hspg2	24017.6	0.706414	0.353758	1.99689	0.0458376	0.365293
ENSMUSG00000033450	Tagap	30.2715	1.35933	0.680655	1.9971	0.0458147	0.365293
ENSMUSG00000033813	Tcea1	1021.76	0.595554	0.298362	1.99608	0.0459252	0.365801
ENSMUSG00000043673	Kcns3	54.2222	-2.44568	1.22544	-1.99576	0.0459604	0.36589
ENSMUSG00000001510	Dlx3	50.9528	1.34809	0.675824	1.99474	0.0460712	0.366276
ENSMUSG00000042041	2010003K11Rik	12.5269	-2.85732	1.43249	-1.99465	0.0460806	0.366276
ENSMUSG00000057666	Gapdh	11289.7	0.869487	0.435853	1.99491	0.0460528	0.366276
ENSMUSG00000018800	Abca5	322.415	0.877737	0.440339	1.99332	0.046226	0.366857
ENSMUSG00000020593	Lpin1	891.919	-1.54136	0.77343	-1.99289	0.0462732	0.366857
ENSMUSG00000024228	Nudt12	107.049	-1.16655	0.585155	-1.99357	0.0461996	0.366857
ENSMUSG00000046844	Vat1l	1140.32	1.44133	0.72317	1.99307	0.0462543	0.366857
ENSMUSG00000055675	Kbtbd11	392.93	-0.912581	0.457918	-1.99289	0.0462735	0.366857
ENSMUSG00000037408	Cnnm4	335.479	1.00336	0.503761	1.99175	0.0463989	0.367185
ENSMUSG00000042793	Lgr6	45.1066	3.01551	1.51409	1.99164	0.0464109	0.367185
ENSMUSG00000061576	Dpp6	46.3125	1.30226	0.653747	1.992	0.0463709	0.367185
ENSMUSG00000062184	Hs6st2	66.7368	1.07467	0.539472	1.99208	0.046362	0.367185
ENSMUSG00000030587	2200002D01Rik	62.4223	-1.00221	0.50351	-1.99045	0.0465409	0.368024
ENSMUSG00000028998	Tomm7	597.466	-0.625456	0.314625	-1.98794	0.0468179	0.369542
ENSMUSG00000031365	Zfp275	558.818	0.713767	0.358956	1.98846	0.0467613	0.369542
ENSMUSG00000058446	Znrf2	703.649	-1.29942	0.653685	-1.98784	0.0468294	0.369542
ENSMUSG00000102758	Naaladl2	167.135	1.35127	0.67974	1.98792	0.0468202	0.369542
ENSMUSG00000032855	Pkd1	7688.82	0.886043	0.445845	1.98733	0.0468854	0.369793
ENSMUSG00000026568	Mpc2	976.396	-0.71938	0.362061	-1.9869	0.0469332	0.36998
ENSMUSG00000036534	Slc38a7	429.502	0.635825	0.320105	1.9863	0.0470002	0.370126
ENSMUSG00000055301	Adh7	180.344	1.21186	0.610047	1.98651	0.046977	0.370126
ENSMUSG00000047216	Cdh19	68.3673	-1.07868	0.543291	-1.98546	0.047093	0.370666
ENSMUSG00000066175	2510046G10Rik	14.7332	-2.03272	1.02392	-1.98523	0.0471194	0.370684
ENSMUSG00000035765	Dym	590.611	0.748502	0.377161	1.98457	0.0471923	0.370706
ENSMUSG00000059479	B3gnt8	104.033	-0.835145	0.420786	-1.98473	0.047175	0.370706
ENSMUSG00000105689	Gm43120	69.3602	-1.1677	0.588395	-1.98455	0.0471949	0.370706
ENSMUSG00000025138	Sirt7	472.44	-0.625682	0.315329	-1.98422	0.047231	0.3708
ENSMUSG00000055639	Dach1	108.845	-1.71972	0.866803	-1.98398	0.0472577	0.370819
ENSMUSG00000038264	Sema7a	587.184	-1.24207	0.626453	-1.98271	0.0474001	0.371746
ENSMUSG00000025531	Chm	352.403	0.671267	0.338693	1.98193	0.0474871	0.372237
ENSMUSG00000065608	Mirlet7c-2	36.6337	-1.6223	0.818786	-1.98135	0.0475523	0.372558
ENSMUSG00000052371	Hoxd3os1	54.096	-1.13432	0.572639	-1.98087	0.0476055	0.372784
ENSMUSG00000026770	Il2ra	31.9095	-2.33514	1.1791	-1.98045	0.0476532	0.37293
ENSMUSG00000090291	Lrrc10b	18.8409	-1.68904	0.852934	-1.98027	0.0476729	0.37293
ENSMUSG00000025425	St8sia5	31.0392	1.72494	0.871397	1.97951	0.0477588	0.373411
ENSMUSG00000067242	Lgi1	40.0518	-1.21734	0.615121	-1.97902	0.0478137	0.373459
ENSMUSG00000108984	Gm44916	12.4787	-2.21221	1.11773	-1.97921	0.0477928	0.373459
ENSMUSG00000027435	Cd93	1553.12	-1.32039	0.667333	-1.9786	0.0478606	0.373635
ENSMUSG00000024471	Myot	376.966	2.09918	1.06153	1.9775	0.0479854	0.374418
ENSMUSG00000026014	Raph1	1445.55	0.763394	0.386172	1.97682	0.0480616	0.374821
ENSMUSG00000029545	Acads	490.973	-1.26906	0.64218	-1.97618	0.0481345	0.375008
ENSMUSG00000078606	Gm4070	25.8019	-1.96924	0.996384	-1.97639	0.0481111	0.375008
ENSMUSG00000026663	Atf6	830.356	0.603312	0.305471	1.97502	0.0482654	0.37551
ENSMUSG00000030281	Il17rc	958.359	-0.902834	0.45719	-1.97475	0.048297	0.37551
ENSMUSG00000031112	Stk26	468.677	1.51003	0.764644	1.97481	0.0482893	0.37551
ENSMUSG00000039476	Prrx2	425.84	1.10724	0.560545	1.97529	0.0482348	0.37551
ENSMUSG00000004561	Mettl17	191.22	-0.727583	0.368557	-1.97414	0.0483655	0.375851
ENSMUSG00000041891	Lman1	4156.88	0.912319	0.4622	1.97386	0.0483972	0.375907
ENSMUSG00000097378	B230208H11Rik	13.2799	-2.17942	1.10461	-1.97302	0.0484932	0.376461
ENSMUSG00000107966	Gm44001	24.6555	-1.61633	0.819682	-1.9719	0.0486209	0.377262
ENSMUSG00000032294	Pkm	12110.6	0.875218	0.443967	1.97136	0.0486827	0.37755
ENSMUSG00000019066	Rab3d	755.065	-1.04223	0.52884	-1.97079	0.0487477	0.377862
ENSMUSG00000049287	Iba57	77.2995	-0.969029	0.491846	-1.97019	0.0488168	0.378207
ENSMUSG00000026341	Actr3	3129.97	0.597567	0.303443	1.96929	0.0489199	0.378622
ENSMUSG00000109812	Gm45640	122.92	-1.14753	0.58268	-1.9694	0.0489077	0.378622
ENSMUSG00000040447	Spns2	472.059	-1.13938	0.578786	-1.96858	0.0490016	0.379058
ENSMUSG00000086448	9330162012Rik	24.7059	-1.59778	0.811729	-1.96837	0.0490257	0.379058
ENSMUSG00000026255	Efhd1	280.762	-0.821738	0.417588	-1.96782	0.0490887	0.379162
ENSMUSG00000030494	Rhpn2	58.9196	-1.35696	0.689549	-1.96789	0.0490808	0.379162
ENSMUSG00000003541	Ier3	495.09	1.01824	0.517819	1.96641	0.0492515	0.380227
ENSMUSG00000001333	Sync	268.045	1.03932	0.528711	1.96577	0.0493255	0.380561
ENSMUSG00000025650	Col7a1	59.5156	-1.07981	0.549572	-1.96482	0.0494354	0.380561
ENSMUSG00000026773	Pfkfb3	2173.81	-1.53742	0.782278	-1.96531	0.049378	0.380561
ENSMUSG00000031204	Asb12	22.1511	2.91831	1.48521	1.96492	0.0494234	0.380561
ENSMUSG00000055172	C1ra	1209.24	-0.616845	0.31387	-1.96529	0.049381	0.380561
ENSMUSG00000079278	Tmem233	148.478	2.66284	1.35531	1.96474	0.0494438	0.380561
ENSMUSG00000046380	Jrk	128.409	0.82745	0.421427	1.96345	0.0495939	0.381524
ENSMUSG00000034560	Washc4	763.254	0.594815	0.302999	1.9631	0.049635	0.381648
ENSMUSG00000034006	Pqlc1	390.301	-0.715386	0.364615	-1.96203	0.049759	0.38241
ENSMUSG00000025498	Irf7	185.785	-1.30936	0.667661	-1.96112	0.0498652	0.383034
ENSMUSG00000023031	Cela1	36.3808	-1.96203	1.00081	-1.96044	0.0499449	0.383454
ENSMUSG00000014602	Kif1a	172.452	0.822716	0.419782	1.95986	0.0500119	0.383775
ENSMUSG00000020241	Col6a2	64589.5	1.04076	0.531115	1.95959	0.0500442	0.383813
[truncated: 13,931 more rows]
