# Supplementary material for: Tendon and motor phenotypes in the Crtap-/- mouse model of recessive osteogenesis imperfecta
Source: eLife. 2021 May 26;10:e63488. doi: 10.7554/eLife.63488 (PMC8186905; doi:10.7554/eLife.63488)
Supplement: Figure 6—source data 4. — Based on a list of differentially expressed genes, upstream regulators were predicted using Ingenuity Pathway Analysis. The results are sorted by adjusted p-value. [file elife-63488-fig6-data4.xlsx]

## Sheet: Sheet1
Figure 6-source data 4. Predicted upstream regulators driving differential gene expression between 1-month wildtype and Crtap knockout patellar tendons.
Upstream regulators predicted using Ingenuity Pathway Analysis, and sorted by adjusted p-value.
Upstream Regulator	Expr Log Ratio	Molecule Type	Predicted Activation State	Activation z-score	Bias-corrected z-score	p-value of overlap	Target molecules in dataset	Mechanistic Network
TNF		cytokine	Activated	4.316	4.398	3.05e-33	ABCC1,Acan,ADCY5,ADIPOQ,ADRB3,Aldh1a7,AOC3,APP,AQP7,ARHGAP18,ATF3,CCN1,CCN2,CD274,CDH11,CDKN1A,CDO1,CEBPA,CERS4,CFD,CHSY3,CIDEC,CLDN5,CNN1,COL15A1,COL2A1,CYP26B1,CYP2E1,DBI,DIO1,DUSP14,EDIL3,EGR1,EGR2,EREG,FABP4,FABP5,FASN,FMO1,FOS,FRZB,GADD45A,GBP6,GDF15,GEM,Gstt1,H19,HAPLN1,HBEGF,HIF1A,HLA-A,HP,HSD11B1,ICAM2,ITGB8,JUN,Kcnn2,KLB,KLK3,LEP,LGALS12,LGR5,LIPE,LRG1,LRP6,LTBP2,MAFA,MMD,MMP2,MSTN,MYOG,…	ATF4,Ap1,CTNNB1,EGF,EGR1,ELK1,ERK1/2,FOXO3,HIF1A,IL6,NFkB (complex),PPARG,SMAD1,SMAD3,SMAD4,SP1,SREBF1,SREBF2,TGFB1,TNF,ZFP36,hydrogen peroxide
PPARG	-3.225	ligand-dependent nuclear receptor	Inhibited	-4.396	-4.347	1.99e-20	Adig,ADIPOQ,ADRB3,AGPAT2,APP,AQP7,CCN2,CD274,CDKN1A,CEBPA,CES1,CFD,CIDEC,CYP4B1,DGAT2,ERO1A,FABP4,FABP5,FASN,FGF1,FGF21,GDF15,GPT,HCAR1,HCAR2,HEBP1,HP,JUN,KLB,LEP,LIPE,LOC102724788/PRODH,MGLL,MYOG,NOX4,PC,PCK2,PLIN1,PLIN4,PPARG,RARRES2,RETN,SCD,SERPINE1,Slc25a1,SLC27A1,SNCG,SPP1,TRIB3,XYLT1	Ap1,CTNNB1,EGR1,FOXO3,HIF1A,MED1,NFkB (complex),PPARG,RUNX3,SMAD3,SMAD4,SP1,SREBF1,SREBF2,TGFB1,TNF,ZFP36,pioglitazone,rosiglitazone
troglitazone		chemical drug		-1.105	-1.08	5.12e-20	ADIPOQ,ADRB3,Aldh1a7,AQP7,ATF3,CDKN1A,CEBPA,CFD,CIDEC,COL15A1,DBI,DGAT2,EGR1,ERO1A,FABP4,FABP5,FASN,FGF21,FOS,GADD45A,GDF15,HP,JUN,KLK3,LEP,LIPE,LOC102724788/PRODH,MYH11,PC,PLIN1,PLIN4,PPARG,PXMP2,RASD1,RETN,SCD,SERPINE1,SLC27A1,SPP1,THRSP,TRIB3,TST,UGT1A6
BSCL2	-1.118	other				4.46e-19	ADIPOQ,ADRB3,AOC3,CEBPA,CFD,CIDEC,CYP2E1,FABP4,GREM1,LEP,LGALS12,MGLL,MRAP,PC,PNPLA2,PPARG,RETN,SLPI,SUCNR1,Sult1a1,THRSP
dexamethasone		chemical drug	Inhibited	-2.031	-1.996	1.43e-17	AACS,ABCC1,ACSS2,ADHFE1,ADIPOQ,ADRB3,ALDH1L1,AOC3,APP,AQP7,ASNS,ATF3,CCN1,CCN2,CD274,CDH11,CDKN1A,CEBPA,CES1,CFD,CIDEC,CILP,CLDN5,COL15A1,COL5A1,COL9A2,CYP2E1,DGAT2,DHRS9,DIO1,DLL1,EGR1,EGR2,EREG,ERRFI1,FABP4,FABP5,FASN,FGF1,FGF21,FMO1,FOS,FSD2,GADD45A,GDF15,GEM,GPT,HAPLN1,HBEGF,HHIP,HIF1A,HLA-A,HP,HSD11B1,ICAM2,Ifi27l2a/Ifi27l2b,IGFALS,IP6K3,JUN,KCNK3,LEP,LGALS12,LIPE,LOC102724788/PRODH,LTBP2,ME…	AGT,Ap1,CTNNB1,EDN1,EGR1,ELK1,FOXO3,HIF1A,IL1A,IL6,NFkB (complex),PPARG,SMAD3,SMAD4,SP1,SREBF1,TGFB1,TNF,ZFP36,dexamethasone
nelfinavir		chemical drug	Activated	3.491	3.568	2.77e-16	ADIPOQ,ADM2,ALDH1L2,ASNS,ATF3,CA6,CEBPA,CHAC1,FABP4,HHIPL1,LIPE,PCK2,PLIN1,PLIN4,PPARG,SLC1A4,SLC6A9,SLC7A11,TNFRSF11B,TRIB3
rosiglitazone		chemical drug	Inhibited	-4.823	-4.776	3.76e-15	ACSS2,ADIPOQ,ADRB3,AOC3,AQP7,CCN2,CDKN1A,CEBPA,CFD,CIDEC,DGAT2,EPHX2,FABP4,FABP5,FASN,FGF1,FGF21,FOS,HCAR1,HCAR2,HP,HSD11B1,KLB,KLK3,LEP,LIPE,LRG1,MCM6,MGLL,Mup1 (includes others),MYOG,NOX4,PC,PLIN1,PPARG,RARRES2,RETN,SCD,SERPINE1,SLC27A1,TNC,TRIM63	Ap1,CTNNB1,EGR1,ELK1,ERK1/2,HIF1A,MED1,NFkB (complex),PPARG,SMAD1,SMAD3,SP1,SREBF1,TNF,rosiglitazone
Ins1		other		1.006	1.058	4e-15	ADIPOQ,AGTR2,Apoc3,AQP7,CDKN1A,CEBPA,CFD,CNN1,CYP2E1,DGAT2,EGR1,EGR2,ERRFI1,FABP4,FASN,FOS,HP,JUN,LEP,LGALS12,LIPE,MELTF,MMP2,MYOG,NOS1,OSTN,PLIN1,PPARG,RETN,SCD,SERPINE1,SLC27A1,TF,THRSP
D-glucose		chemical - endogenous mammalian		1.153	1.195	4.75e-15	Acan,ACVR1C,ADCY5,ADIPOQ,APP,ASNS,ATF3,CCN2,CDKN1A,CEBPA,CNN1,COL2A1,CYP2E1,DBI,EGR1,ERO1A,FABP5,FASN,FGF21,FOS,FUT1,GDF15,GREM1,HAPLN1,HIF1A,HP,Ifi27l2a/Ifi27l2b,JUN,LEP,LIPE,LOC102724788/PRODH,MAFA,MMP2,MYH11,NOX4,Orm1 (includes others),PC,PCK2,PLAUR,PPARG,RETN,SCD,SERPINE1,SLC25A10,SLC3A2,SOX9,SPP1,THRSP,TRIM63
lipopolysaccharide		chemical drug	Activated	2.496	2.592	7.23e-15	ABCC1,ADIPOQ,AGTR2,Apol11b (includes others),APP,AQP7,ATF3,CCN1,CCN2,CD274,CDC42EP2,CDH11,CDKN1A,CEBPA,CFD,CLDN5,COL5A1,COL5A2,COL9A1,COL9A3,CRTAP,CYP2E1,EGR1,EGR2,EMB,EPHX2,EREG,ERO1A,F2R,FABP4,FABP5,FASN,FBN1,FFAR2,FGF21,FOS,GADD45A,GBP6,GEM,GJA5,GLRB,GPT,H19,HBEGF,HCAR2,HIF1A,HLA-A,HP,ICAM2,ITGB8,JUN,LEP,LIPG,LRRFIP1,MELTF,MMP2,NOS1,NOX4,OLFML2B,Orm1 (includes others),PC,PLAUR,PPARG,PTGFR,RETN…	ATF4,Ap1,CTNNB1,EGR1,ELK1,ERK1/2,FOXO3,HDAC6,HIF1A,IL1A,IL6,LIF,MYD88,NFkB (complex),PPARG,SMAD1,SMAD3,SMAD4,SP1,SREBF1,TGFB1,TNF,ZFP36,hydrogen peroxide,lipopolysaccharide,nitric oxide
Insulin		group		-0.677	-0.631	1.23e-14	ADIPOQ,ADRB3,APP,ATF3,CA3,CCN2,CDKN1A,CEBPA,CIDEC,COL5A1,DBI,DGAT2,EGR1,EGR2,ERO1A,ERRFI1,FABP4,FASN,FGF21,FOS,HIF1A,HSD11B1,IGFALS,JUN,KLK3,LEP,LGALS12,LIPE,MCM6,MMP2,Orm1 (includes others),PLAAT3,PLIN1,PNPLA2,PPARG,RETN,SCD,SERPINE1,THRSP,TNC,TRIM63
CTNNB1	0.009	transcription regulator	Activated	2.387	2.47	1.67e-14	ABCC1,Acan,ADIPOQ,AOC3,APCDD1,APP,ATF3,CA3,CCN1,CCN2,CDH11,CDKN1A,CEBPA,CFD,CIDEC,CLDN5,CNTFR,COL2A1,CYP2E1,DGAT2,DIO1,EDIL3,EGR1,EREG,F2R,FABP4,FASN,FOS,GDF15,GPAT3,GREM1,HAPLN1,HBEGF,HHIP,HOXA5,JUN,KLK3,LGR5,LIPE,LRP6,MMP2,Mup1 (includes others),MYOG,PLAUR,PLIN1,PPARG,RETN,Rpl29 (includes others),SCD,SDC2,SERPINA3,SERPINE1,SERPINE2,SOX17,SOX9,SPP1,TNC,TNFRSF11B,TSPAN8,VCAN	Ap1,CTNNB1,EGR1,ELK1,ERK,ERK1/2,FOXO3,HIF1A,NFkB (complex),PPARG,SMAD1,SMAD3,SMAD4,SP1,SREBF1,STAT6,TNF
IGF1	0.478	growth factor		1.564	1.626	3.32e-14	Acan,ACSS2,ADIPOQ,AGTR2,APP,CCN1,CCN2,CDKN1A,CNN1,COL2A1,EGR1,EGR2,ERRFI1,FABP4,FASN,FOS,GADD45A,HAPLN1,HIF1A,HSD11B1,JUN,LEP,MMP2,MSTN,MYH11,MYH8,MYOG,NOG,NOX4,PCK2,PLAUR,PPARG,PRNP,SCD,SERPINE1,SLPI,SNCG,SPP1,TF,THRSP,TNFRSF11B
10E,12Z-octadecadienoic acid		chemical - endogenous mammalian	Activated	3.78	3.787	6.26e-14	ACSM5,ACSS2,ADIPOQ,ATF3,CA3,CEBPA,Ces1f,CFD,DGAT2,EGR2,ENDOU,FABP4,FASN,GDF15,HSD11B1,LGALS12,LIPE,PLIN1,PNPLA2,PPARG,RETN,SCD,SNCAIP,TRIB3	10E,12Z-octadecadienoic acid,CTNNB1,PPARG,SREBF1
dihydrotestosterone		chemical - endogenous mammalian		-0.651	-0.597	8.6e-14	ADIPOQ,ADRB3,Apoc3,APP,CA3,CCN2,CDKN1A,CDO1,CEBPA,COL5A2,CYP4B1,DBI,EGR1,F2R,FABP4,FASN,FOS,HLA-A,HOXA5,JUN,KLK3,LEP,LIPE,MGLL,MMP2,Mup1 (includes others),NEDD4L,NNAT,NOS1,PC,PPARG,PRNP,RARRES2,RETN,RUNX1,SCD,SERPINE2,SLC1A4,Slc25a1,SLC3A2,SOX9,SPP1,STBD1,TF,VCAN
CEBPA	-2.687	transcription regulator		-1.595	-1.55	1.1e-13	ADCY7,ADIPOQ,ADRB3,AGPAT2,APCDD1,Apoc3,ASNS,CDKN1A,CEBPA,CFD,DGAT2,EGR2,FABP4,FASN,FOS,GADD45A,HP,HSD11B1,ICAM2,JUN,LEP,Mup1 (includes others),MYOG,Orm1 (includes others),PLIN1,PLOD2,PPARG,PTGFR,RARRES2,RETN,SCD,SERPINE1,SPINT2,SPP1,STEAP4,TAC1,TIMP4,VCAN
WNT3A		cytokine		1.727	1.792	2.01e-13	Acan,ADM2,APP,ARHGAP18,CAVIN4,CCN1,CCN2,CEBPA,CFD,COL2A1,EGR2,FABP4,HHIP,IRX3,JUN,LGALS12,LGR5,LRP6,MMD,NDNF,PLIN1,PPARG,RUNX1,SLC7A11,SLPI,SOX17,SOX9,TNC,TNFRSF11B,TNN,TRIB3
PDGF BB		complex	Activated	2.611	2.688	2.14e-13	ATF3,CCN1,CCN2,CDKN1A,CDO1,CNN1,EGR1,EGR2,EREG,FASN,FMO1,FOS,FRZB,GADD45A,GDF15,GEM,GJA5,GREM1,H19,HBEGF,JUN,MCM6,MMP2,MYH11,NOS1,NOX4,PPARG,SCD,SERPINA3,SERPINE1,TNC,TRIB3,VCAN	Ap1,CTNNB1,EGR1,ELK1,ERK,ERK1/2,FGF2,FOXO3,HIF1A,IL6,Jnk,MAP2K1/2,NFkB (complex),PDGF BB,PPARG,PRKCD,SMAD1,SMAD3,SMAD4,SP1,SREBF1,STAT6,TGFB1,Tgf beta,ZFP36
CEBPB	-0.003	transcription regulator		-1.02	-0.936	8.21e-13	ADIPOQ,ADRB3,APCDD1,APP,ASNS,CDKN1A,CDO1,CEBPA,CFD,COL5A2,CYP2E1,DGAT2,EDIL3,FABP4,FOS,GADD45A,H4C9,HLA-A,HP,HSD11B1,JUN,LEP,Orm1 (includes others),PLAUR,PPARG,PRKAR2B,PTGFR,SCD,SERPINE1,SPP1,TAC1,TF,TIMP4,TRIB3,UGT1A6,VCAN
PPARA	-2.039	ligand-dependent nuclear receptor		-1.968	-1.926	2.4e-12	ACSS2,ADIPOQ,ADRB3,Apoc3,APP,AQP7,ASNS,C2,CDKN1A,CEBPA,CIDEC,DBI,DIO1,FABP4,FABP5,FASN,FGF21,FOS,GPT,Gstt1,HIF1A,LIPG,MGLL,MMD,Mup1 (includes others),Orm1 (includes others),PAQR9,PC,PLIN1,PLIN4,PNPLA2,PON1,PPARG,RETN,SCD,SLC27A1,STBD1
FGF2	0.823	growth factor	Activated	2.711	2.778	3.62e-12	AGTR2,CCN1,CDH11,CDKN1A,CIDEC,DLL1,EGR1,EREG,ERRFI1,FABP4,FBN1,FOS,GADD45A,GREM1,HBEGF,HIF1A,JUN,LRP6,MMD,MMP2,MYOG,NOG,PDGFC,PLAUR,PPARG,PTTG1,RUNX1,SCD,SDC2,SERPINE1,SOX17,SOX9,SPP1,TAC1,TF	Ap1,CTNNB1,EGR1,ELK1,ERK,ERK1/2,FGF2,FOXO3,HIF1A,IL6,NFkB (complex),NGF,PPARG,SMAD1,SMAD3,SMAD4,SP1,SRC,SREBF1,STAT6,Tgf beta
LEP	-4.782	growth factor		1.891	1.937	6.34e-12	ADIPOQ,ADRB3,APP,AQP7,CA3,CCN1,CDKN1A,CFD,COL2A1,CYP2E1,EGR1,EGR2,EPHX2,FABP4,FASN,FGF21,FOS,GADD45A,JUN,KLB,LEP,LIPE,MMP2,MYOG,NOS1,PLIN1,PNPLA2,PPARG,RETN,SCD,SERPINE1,SLC27A1,SPP1,STEAP4,Tgtp1/Tgtp2,THRSP,TNFRSF11B
Pkc(s)		group		0.517	0.583	1.47e-11	APP,ATF3,CCN1,CCN2,CDKN1A,CNN1,CYP2E1,EGR1,EGR2,FABP4,FOS,GADD45A,HIF1A,JUN,MMP2,MYOG,NOS1,NOX4,PON1,PPARG,SERPINE1,SLC6A9,SPP1,TAC1
beta-estradiol		chemical - endogenous mammalian		1.558	1.62	2.37e-11	ADIPOQ,ADM2,ADRB3,AGTR2,APCDD1,APP,ATF3,CCN1,CCN2,CD274,CDH11,CDKN1A,CEBPA,Ces1f,CNN1,CNTFR,CYP26B1,CYP2E1,CYP4B1,DHRS9,DIO1,DLL1,EGR1,EGR2,EREG,ERRFI1,FABP4,FABP5,FASN,FBN1,FCGR2A,FGF1,FMO1,FOS,GADD45A,GDF15,GEM,GLRB,GREM1,Gstt1,H19,HBEGF,HIF1A,HLA-A,HOMER1,HSD11B1,IARS1,IP6K3,JUN,KLK3,LEP,LGR5,LUM,MAL2,MCM6,MGLL,MMD,MMP2,MYOG,NEDD4L,NOS1,PKMYT1,PLAUR,PPARG,PTGER3,PTGFR,PTTG1,RARRES2,RASD1,REEP1…
L-glutamic acid		chemical - endogenous mammalian		1.262	1.316	3.44e-11	APP,CDKN1A,CFD,CIDEC,CLDN5,EGR1,FASN,FOS,HIF1A,HOMER1,JUN,Kcnn2,LEP,MGLL,MMP2,NOS1,Slc25a1,SLC27A1
IL6		cytokine	Activated	2.093	2.169	3.49e-11	ABCC1,APP,ATF3,CCN2,CD274,CDKN1A,CEBPA,CES1,CFD,COL2A1,CYP2E1,DIO1,EGR1,EGR2,EREG,ERRFI1,FFAR2,FOS,GADD45A,GREM1,HIF1A,HLA-A,HP,JUN,KLK3,LEP,LRG1,LRP6,MMD,MMP2,Orm1 (includes others),PON1,PPARG,PRNP,PTGFR,PTTG1,SERPINA3,SERPINE1,SPP1,STAP2,STEAP4,TAC1,TF,THRSP,TNC,TNFRSF11B	AGT,Ap1,CTNNB1,EDN1,EGR1,ELK1,ERK1/2,FOXO3,HIF1A,IL1A,IL6,MAP2K1/2,MAP2K4,NFkB (complex),PPARG,SMAD1,SMAD3,SMAD4,SP1,SREBF1,TNF
Y 27632		chemical drug	Inhibited	-2.315	-2.356	3.67e-11	Acan,CCN1,CCN2,CDKN1A,CEBPA,CLDN5,COL2A1,FABP4,FOS,MMP2,MYH11,PPARG,SERPINE1,SOX17,SOX9	Ap1,CTNNB1,EDN1,EGR1,ELK1,ERK,ERK1/2,FOXO3,HIF1A,NFkB (complex),PPARG,RAC1,SMAD1,SMAD3,SMAD4,SP1,STAT6,TGFB1,Y 27632,ZFP36
RXRA	-0.317	ligand-dependent nuclear receptor		-1.2	-1.184	6.89e-11	Apoc3,APP,AQP7,ASNS,CD109,CDKN1A,CDO1,CEBPA,FABP4,FABP5,FASN,FGF21,FOS,GPT,HBEGF,HIF1A,MMP2,MYOG,Orm1 (includes others),PC,PCK2,PLIN1,PPARG,SCD,SLC27A1,SPP1,THRSP,VCAN
IL1B		cytokine		1.311	1.379	8.53e-11	Acan,APP,ATF3,CCN2,CD274,CDKN1A,CEBPA,COL2A1,CYP2E1,DBI,DIO1,EGR1,ERRFI1,FABP5,FOS,GADD45A,GBP6,GDF15,GEM,H19,HBEGF,HIF1A,HLA-A,HOMER1,HP,HSD11B1,IGFALS,ITGB8,JUN,LEP,MAFA,MMP2,MYH11,MYOG,NOS1,PLXDC2,PPARG,PTGFR,SERPINA3,SERPINE1,SLC7A11,SOX9,SPP1,SUCNR1,TAC1,Tgtp1/Tgtp2,THRSP,TIMP4,TNFRSF11B,VCAN,XYLT1
TGFB3	-0.294	growth factor	Activated	3.657	3.73	9.45e-11	CCN1,CCN2,CDKN1A,COL2A1,COL5A1,FOS,JUN,LTBP2,MMP2,PLAUR,PLOD2,SCD,SERPINE1,SERPINE2,SOX9,TNC,TNFRSF11B	Ap1,CDC42,CTNNB1,EGR1,ELK1,ERK1/2,FGF2,FOXO3,HIF1A,HRAS,NFkB (complex),SMAD1,SMAD3,SMAD4,SP1,TGFB3
forskolin		chemical toxicant		1.459	1.53	1.11e-10	Acan,ADIPOQ,APP,ATF3,CARD10,CCN2,CDKN1A,CIDEC,CNN1,COL15A1,DUSP14,EGR1,EREG,ERRFI1,FOS,GADD45A,GEM,GFRA1,H19,HAPLN1,HHIP,HIF1A,HOMER1,HOXA5,HP,HSD11B1,JUN,KLK3,LEP,LGALS12,MMD,NNAT,OSTN,PHKA2,PRKAR2B,RUNX1,SERPINE1,SLC7A11,SOX17,SPP1,TAC1,THRSP,TNFRSF11B,VCAN
ATF4	0.53	transcription regulator	Activated	3.383	3.473	1.12e-10	ASNS,ATF3,CDKN1A,CHAC1,ERO1A,FASN,FGF21,GADD45A,GDF15,IARS1,JUN,NOX4,PCK2,PPARG,SLC1A4,SLC3A2,SLC6A9,SLC7A11,SLC7A3,TNFRSF11B,TRIB3
U0126		chemical - kinase inhibitor		-1.997	-2.084	1.34e-10	Acan,ADIPOQ,ALDH1L1,ATF3,CCN2,CD274,CDKN1A,CEBPA,COL2A1,CYP2E1,EGR1,EREG,ERRFI1,FABP4,FOS,GALNT3,GDF15,HAPLN1,HBEGF,HIF1A,JUN,KLK3,LEP,MMP2,MYOG,NNAT,NOS1,PLAUR,PLIN1,PPARG,RUNX1,SERPINE1,SOX9,SPP1,TAC1,TF,TNFRSF11B
CCNC	0.479	other	Inhibited	-2.488	-2.425	1.67e-10	ADIPOQ,CEBPA,FABP4,FASN,FGF21,LIPE,PLIN1,PNPLA2,PPARG,SCD
ERBB2	-0.166	kinase		0.879	0.943	2e-10	ACSS2,Adig,ADRB3,Aldh1a7,ATF3,CCN2,CDC42EP2,CDH11,CDKN1A,CES1,CIDEC,COL5A1,COL5A2,CYP4B1,DLL1,EGR1,EPHX2,EREG,F2R,FASN,FOS,GALNT3,GBP6,H19,HBEGF,HIF1A,HP,IRX3,JUN,KLK3,LRRFIP1,LTBP2,LUM,MCM6,MFNG,NOX4,PCK2,PLAUR,PPARG,SERPINA3,SERPINE1,SLPI,SPINT2,Sult1a1,TNC,UGT1A6,VCAN
INS		other		0.834	0.846	2.8e-10	ADIPOQ,CCN1,CCN2,CDKN1A,CIDEC,EGR1,EGR2,ERRFI1,FASN,FOS,HIF1A,JUN,LEP,NOS1,NOX4,PPARG,RASL12,SCD,Slc25a1,TRIB3
FASN	-1.926	enzyme	Inhibited	-3.687	-3.637	2.87e-10	ADIPOQ,Aldh1a7,Apoc1,CFD,CIDEC,DGAT2,FABP4,FASN,FGF1,PNPLA2,PON1,PRKAR2B,RETN,SCD	FASN,PPARG,SREBF1,SREBF2
diethylstilbestrol		chemical drug	Activated	3.016	3.066	2.99e-10	ADIPOQ,ADM2,AGTR2,BCHE,CCN2,CDKN1A,EGR1,ENDOU,EREG,FMO1,FOS,FRZB,GADD45A,GREM1,HBEGF,HLA-A,KLK3,LEP,LTBP2,LUM,MMP2,MOXD1,PTK7,PTTG1,RUNX1,SLPI,TF,Tgtp1/Tgtp2	Ap1,CTNNB1,EGF,EGR1,ELK1,ERK,ERK1/2,FOXO3,HIF1A,NFkB (complex),SMAD1,SMAD3,SP1,SREBF1,STAT6,diethylstilbestrol
pioglitazone		chemical drug	Inhibited	-2.092	-2.084	3.19e-10	ADIPOQ,ADRB3,APP,AQP7,CCN2,CDKN1A,CFD,EGR1,FABP4,FGF21,FOS,KLK3,LEP,LIPE,PC,PLIN1,PPARG,RETN,SERPINE1,SLC27A1	Ap1,CTNNB1,EGR1,ELK1,ERK,ERK1/2,FOXO3,HIF1A,NFkB (complex),PPARG,SMAD1,SMAD3,SP1,SREBF1,SREBF2,STAT6,TNF,pioglitazone
HRH3	-0.751	g-protein coupled receptor		-1.432	-1.445	8.18e-10	ADRB3,Aldh1a7,CFD,LEP,Mup1 (includes others),NNAT,RETN,SERPINA3,SLPI,TMEM45B,VCAN
ASXL2	0.119	other	Inhibited	-2.53	-2.454	9.37e-10	Apoc1,CFD,FFAR2,HSD11B1,LIPE,PLIN1,PPARG,RARRES2,SCD,SERPINE1	ASXL2,CTNNB1,PPARG,SREBF1
MAP2K1	0.041	kinase		1.967	2.038	9.51e-10	ABCC1,ALDH1L1,ATF3,CCN1,CCN2,CD274,CDKN1A,CEBPA,EGR2,F2R,FASN,FOS,HIF1A,JUN,LEP,MMP2,NOS1,PLAUR,SERPINE2,SOX9,TNC
PD98059		chemical - kinase inhibitor	Inhibited	-2.825	-2.911	1.09e-09	ADIPOQ,ATF3,CCN2,CDKN1A,CEBPA,EGR1,EGR2,EREG,ERRFI1,F2R,FABP4,FASN,FOS,GADD45A,HBEGF,HIF1A,JUN,LEP,LIPG,MGLL,MMD,MMP2,MYH11,MYOG,NOS1,PC,PLAUR,PPARG,PRNP,RETN,RUNX1,SERPINE1,SLC3A2,SPP1,TF,Trim30a/Trim30d,VCAN	AGT,Ap1,CTNNB1,EDN1,EGF,EGR1,ELK1,ERK,ERK1/2,FGF2,FOXO3,HIF1A,IL6,NFkB (complex),NGF,PD98059,SMAD1,SMAD3,SMAD4,SP1,SREBF1,STAT6,nitric oxide
glyceraldehyde-BSA		chemical reagent	Inhibited	-2.429	-2.404	1.45e-09	ADIPOQ,CDKN1A,CEBPA,FASN,LEP,PPARG
methylglyoxal-BSA		chemical reagent	Inhibited	-2.429	-2.404	1.45e-09	ADIPOQ,CDKN1A,CEBPA,FASN,LEP,PPARG
carbon tetrachloride		chemical toxicant	Activated	2.85	2.91	1.49e-09	ABCC1,Apoc3,ATF3,CA3,CCN2,CDKN1A,CYP2E1,FGF21,FOS,GADD45A,GDF15,H19,JUN,MGLL,MMP2,PDGFC,PON1,PPARG,PRNP,SPP1,Sult1a1,TF	Ap1,CTNNB1,EGR1,ELK1,FOXO3,HIF1A,IL6,Jnk,NFkB (complex),PDGF BB,SMAD3,SMAD4,SP1,SREBF1,Tgf beta,carbon tetrachloride
TGFB2	0.646	growth factor	Activated	2.338	2.374	2.62e-09	CCN2,CDH11,CNN1,EGR1,EGR2,FOS,HBEGF,LIPG,MMP2,PLOD2,RUNX1,SCD,SERPINE1,SPP1,TNFRSF11B,VCAN	Ap1,CTNNB1,EGR1,ELK1,ERK1/2,FGF2,FOXO3,HIF1A,NFkB (complex),PPARG,SMAD1,SMAD3,SMAD4,SP1,TGFB1,TGFB2,Tgf beta,ZFP36
ASXL1	0.316	transcription regulator	Activated	2.53	2.468	2.77e-09	Apoc1,CFD,FFAR2,HOXA5,HSD11B1,LIPE,PLIN1,PPARG,RARRES2,SCD,SERPINE1	ASXL1,CTNNB1,PPARG,SREBF1
LY294002		chemical - kinase inhibitor		-1.648	-1.75	2.93e-09	ABCC1,ACSS2,AGTR2,ATF3,CCN1,CCN2,CD274,CDKN1A,CEBPA,CYP2E1,EDIL3,EGR1,EGR2,EREG,F2R,FASN,FGF21,FOS,GDF15,GEM,HAPLN1,HBEGF,HIF1A,JUN,LEP,MMP2,MYH11,MYOG,PPARG,SCD,SERPINE1,SPP1,TAC1,VCAN
SMARCA4	-0.169	transcription regulator		1.894	1.992	3.27e-09	ADIPOQ,ASNS,CCN2,CDH11,CDKN1A,CHODL,CYB5R2,CYP4B1,DHRS9,DLL1,EGR1,EREG,FABP4,FCGR2A,FFAR2,FOS,FUT1,GADD45A,HHIP,HNMT,ICAM2,JUN,KLK3,LUM,MELTF,MMP2,MYH11,MYOG,PLAUR,PPARG,RETN,SDC2,SERPINE1,SERPINE2,SOX17,SPP1,TSPAN8
BMP2	0.138	growth factor		1.774	1.833	3.39e-09	Acan,CDKN1A,COL2A1,EPHX2,FABP4,FGF21,FOS,GFRA1,Gkn3,GREM1,JUN,MELTF,MYOG,NOG,PPARG,SOX9,SPP1,TAC1,TNFRSF11B,TNN,VCAN
streptozocin		chemical drug		1.436	1.454	4.33e-09	ATF3,CCN2,CEBPA,CYP2E1,FABP4,FASN,FBN1,FOS,GREM1,HIF1A,IGFALS,LEP,MMP2,NOS1,NOX4,OSTN,PPARG,RETN,SCD,SERPINE1,Slc25a1,SPP1
Growth hormone		group		1.245	1.285	5.05e-09	ADIPOQ,CA3,CEBPA,CYP2E1,EGR1,FABP4,FASN,FGF21,FOS,GDF15,GPT,IGFALS,JUN,LIPE,MSTN,NOX4,PLAAT3,PON1,PPARG,SPP1,TF
CG		complex		1.948	2.031	5.34e-09	Aldh1a7,APCDD1,CDKN1A,CEBPA,DBI,EGR1,EMB,EREG,FABP4,FABP5,FOS,GBP6,HAPLN1,HIF1A,HLA-A,HSD11B1,JUN,MMP2,PLAUR,PPARG,PTGFR,RETN,RUNX1,SPP1,STEAP1,TAC1,TIMP4,VCAN
Akt		group		1.853	1.883	5.77e-09	ADIPOQ,CCN2,CD274,CDKN1A,COL2A1,EGR2,FABP4,FASN,FOS,HIF1A,JUN,KCNA5,LEP,MMP2,NOS1,NOX4,PPARG,RASD1,SCD,SERPINE1,SOX9,SPP1,TNC,VCAN
P38 MAPK		group		1.559	1.649	7.83e-09	ADIPOQ,ATF3,CCN2,CDKN1A,CEBPA,CLDN5,EGR1,EGR2,FABP4,FGF21,FOS,HIF1A,HOMER1,HP,ITGB8,JUN,LEP,MMP2,MYH11,MYOG,PLAUR,PPARG,RUNX1,SDC2,SERPINE1,SPP1,Tgtp1/Tgtp2
tunicamycin		chemical - endogenous non-mammalian	Activated	2.484	2.541	1.19e-08	Acan,ASNS,ATF3,CA6,CDKN1A,CHAC1,CLDN5,COL2A1,DGAT2,EGR1,ERO1A,FASN,FGF21,HAPLN1,HSD11B1,NEDD4L,PCK2,PPARG,PRNP,SCD,SLC7A11
Mt2	1.076	other		-0.077	-0.131	1.2e-08	ATF3,CEBPA,FOS,GPT,Gstt1,JUN,LEP,SERPINE1
bucladesine		chemical toxicant		0.248	0.312	1.28e-08	Acan,CDKN1A,DIO1,EGR1,EGR2,ERRFI1,FCGR2A,FGF21,FOS,GDF15,GEM,H19,HHIP,HSD11B1,IGFALS,JUN,LEP,LGALS12,LIPE,MMD,MMP2,MYOG,SERPINE1,SLC9A3R2,SOX17,TF,TINAGL1
SOX9	2.034	transcription regulator		1.514	1.556	1.3e-08	Acan,CCN2,CDKN1A,COL2A1,CYP26B1,FOS,H19,HAPLN1,KLK3,LRP6,PPARG,SOX9
CIDEC	-3.952	other		-0.008	-0.057	1.37e-08	COX4I2,DGAT2,FASN,LEP,LIPE,PLIN1,PNPLA2,PPARG,SCD,SERPINE1
cycloheximide		chemical reagent		0.49	0.473	1.38e-08	Acan,APP,CCN1,CCN2,CDKN1A,COL2A1,COL5A1,DIO1,EGR1,FOS,GADD45A,HBEGF,HIF1A,HSD11B1,JUN,KLK3,LEP,MMP2,MYOG,PLAUR,PPARG,PRKAR2B,RERG,SCD,SERPINE1,SPP1,Tgtp1/Tgtp2,TNFRSF11B
thapsigargin		chemical toxicant	Activated	2.494	2.553	1.4e-08	Acan,ADIPOQ,ASNS,ATF3,CDKN1A,CHAC1,COL2A1,EGR1,EGR2,ERRFI1,FGF21,FOS,GADD45A,HAPLN1,HIF1A,JUN,NEDD4L,PCK2,PRNP,THRSP	ATF4,Ap1,CTNNB1,EGR1,ELK1,FOXO3,HIF1A,IL6,MAPK3,NFkB (complex),SMAD3,SP1,SREBF1,thapsigargin
resveratrol		chemical drug		0.68	0.664	1.42e-08	ADIPOQ,APP,ATF3,CDKN1A,COX4I2,CYP2E1,EGR1,FABP4,FASN,FGF21,FOS,GDF15,HIF1A,JUN,KLK3,LEP,MMP2,PLIN1,PON1,PPARG,SERPINE1,SPP1,TNFRSF11B
isobutylmethylxanthine		chemical toxicant	Inhibited	-2.319	-2.271	1.57e-08	ADIPOQ,CCN2,CDKN1A,CEBPA,CIDEC,COL5A1,DGAT2,EGR1,EGR2,FABP4,FOS,JUN,LGALS12,MMP2,PLAAT3,PLIN1,PPARG,RETN,SCD,SERPINE1,TNC	Ap1,CTNNB1,EGR1,ELK1,ERK1/2,FOXO3,HIF1A,MAPK3,NFkB (complex),PPARG,SMAD1,SMAD3,SMAD4,SP1,SREBF1,TEAD4,TGFB1,TNF,ZFP36,isobutylmethylxanthine,nitric oxide
PPARGC1A	-0.147	transcription regulator		-0.902	-0.877	1.67e-08	ADIPOQ,Apoc3,C2,CCN2,CDKN1A,COL2A1,DIO1,FABP4,FASN,FGF21,GDF15,HAPLN1,HIF1A,LUM,MCM6,MMP2,PCK2,PNPLA2,SCD,SEMA3G,SERPINA3,SERPINE2,STAC2,TNFRSF11B,TRIB3,TRIM63,VCAN
IL17A		cytokine		0.196	0.265	1.88e-08	CCN1,CCN2,CD274,COL2A1,EDIL3,EGR2,EREG,FMO1,FOS,GADD45A,HBEGF,JUN,LEP,MMP2,PPARG,PTGFR,STEAP4,Tgtp1/Tgtp2,TIMP4,TNC,TNFRSF11B
SP3	0.329	transcription regulator		1.654	1.694	1.88e-08	ASNS,ATF3,CDKN1A,CEBPA,CES1,COL2A1,EGR1,EREG,F2R,FOS,GDF15,ITGB8,JUN,MMP2,MYH11,NOS1,PLAUR,PTTG1,SERPINE1,TNC,XYLT1
BMPR1B	0.046	kinase	Activated	2.219	2.266	1.89e-08	Acan,CDKN1A,CFD,COL2A1,HAPLN1,PPARG,SERPINE1,SOX9	BMPR1B,SMAD1,SP1
mercuric chloride		chemical toxicant				1.92e-08	CDKN1A,CYP2E1,GADD45A,HBEGF,HP,JUN,Mup1 (includes others),Orm1 (includes others),SPP1
SREBF1	-1.195	transcription regulator	Inhibited	-2.196	-2.128	2.13e-08	AACS,ACSS2,ADIPOQ,CDKN1A,CEBPA,CFD,DBI,FABP4,FABP5,FASN,KLK3,LEP,MYOG,PCK2,PPARG,RETN,SCD,SERPINA3,SERPINE1,TF,THRSP,TRIM63	CTNNB1,PPARG,SCAP,SREBF1,SREBF2
GPER1	-0.759	g-protein coupled receptor		1.945	2.006	2.14e-08	ATF3,CCN1,CCN2,CDKN1A,EGR1,ERRFI1,FASN,FOS,JUN,MYH11,RASD1
L-triiodothyronine		chemical - endogenous mammalian		-1.962	-1.91	2.24e-08	ADIPOQ,APP,CCN2,CDKN1A,CEBPA,DIO1,EGR1,EGR2,FABP4,FASN,FGF21,FOS,GDF15,HIF1A,HOMER1,HP,HSD11B1,LEP,LIPE,MAFA,Mup1 (includes others),PCK2,PPARG,PTTG1,RGS9,SCD,SERPINE1,SLC27A1,TF,THRSP
KRAS	-0.174	enzyme		1.367	1.374	2.26e-08	ATF3,CCN2,CD274,CDKN1A,EGR1,EGR2,EREG,ERO1A,FASN,FBN1,FCGR2A,FOS,GADD45A,HBEGF,HIF1A,HOXA5,JUN,LIPG,MMD,MMP2,PC,PPARG,PTTG1,SCD,SERPINA3,SERPINE2,SLC36A2,SLC3A2,SLC7A10,SLC7A11,SOX17,SOX9,Spaar,SPP1,TINAGL1,TNC,TNFRSF11B,Trim30a/Trim30d,VCAN
SPDEF	-0.429	transcription regulator	Inhibited	-2.395	-2.442	2.38e-08	CCN2,CDH11,CDKN1A,COL5A1,COL5A2,HIF1A,KLK3,PLAUR,SDC2,SERPINE1,SOX17,TNC	CTNNB1,NFkB (complex),PPARG,SMAD3,SMAD4,SPDEF
CREB1	0.134	transcription regulator		0.348	0.389	2.44e-08	ATF3,BPIFC,CCN1,CDH11,CDKN1A,CNN1,DUSP14,EDIL3,EGR1,EGR2,ERRFI1,FASN,FOS,GADD45A,GEM,GFRA1,HLA-A,HOMER1,HSD11B1,JUN,KCNC4,LEP,MCM6,NEO1,NNAT,NOS1,PLXDC2,PPARG,RERG,ROBO1,RSPO2,SCD,STAC2,TAC1,TF
tetradecanoylphorbol acetate		chemical drug	Activated	3.669	3.753	2.53e-08	Acan,ACSM5,ADRB3,APP,ATF3,CCN1,CCN2,CDKN1A,CEBPA,CES1,CIDEC,CYP2E1,DIO1,EGR1,EGR2,ERRFI1,FBN1,FFAR2,FOS,GDF15,GEM,H19,HAPLN1,HBEGF,HIF1A,HOXA5,HSD11B1,JUN,KLK3,LIPE,LIPG,LRRFIP1,MMP2,MYOG,P2RX1,PCK2,PLAUR,PON1,PPARG,PRKAR2B,PRNP,PTGFR,RETN,RUNX1,SERPINA3,SERPINE1,SLC7A11,SLPI,SNCG,SPP1,THRSP,TNFRSF11B,VCAN	AGT,ATF4,Ap1,CTNNB1,EGF,EGR1,ELK1,FOXO3,HIF1A,IL6,NFkB (complex),NRG1,PPARG,PRKCD,SMAD3,SMAD4,SP1,SREBF1,TNF,hydrogen peroxide,tetradecanoylphorbol acetate
TGFB1	0.286	growth factor	Activated	4.307	4.367	2.74e-08	Acan,ADIPOQ,AGTR2,APP,ASNS,C2,CALML4,CCN1,CCN2,CDH11,CDKN1A,CEBPA,CFD,CIDEC,CNN1,COL2A1,COL5A1,EGR1,EGR2,EREG,ESAM,F2R,FABP5,FASN,FBN1,FGF21,FOS,GADD45A,GDF15,GEM,GPT,GREM1,HBEGF,HCAR2,HEBP1,HIF1A,HNMT,IARS1,ICAM2,JUN,Kcnn2,KLK3,LEP,LOC102724788/PRODH,LTBP2,MELTF,MMP2,MSTN,MYH11,MYOG,NOG,NOX4,PDGFC,PLAUR,PLOD2,PPARG,RASGRF2,RETN,RNF152,RUNX1,SCD,SERPINA3,SERPINE1,SERPINE2,SLC16A3,SLC3A2,SOX9,SPP1…	Ap1,CTNNB1,EDN1,EGR1,ELK1,FGF2,FOXO3,HIF1A,LIF,NFkB (complex),PPARG,SMAD1,SMAD3,SMAD4,SP1,TGFB1,TGFB2,Tgf beta
AGPAT2	-2.279	enzyme		-0.956	-0.952	2.77e-08	ADIPOQ,FABP4,FASN,LEP,PLIN1,PPARG,SCD
lysophosphatidic acid		chemical - other	Activated	2.468	2.532	2.83e-08	CCN1,CCN2,EGR1,FABP4,FOS,HIF1A,JUN,LIPE,LIPG,LRP6,PLAUR,PPARG,SERPINE1,TF	Ap1,CTNNB1,EGR1,ELK1,ERK,ERK1/2,FOXO3,HIF1A,HRAS,IL6,Jnk,MAP2K1/2,MAP3K1,NFkB (complex),PPARG,SMAD1,SMAD3,SMAD4,SP1,SREBF1,STAT6,ZFP36,lysophosphatidic acid
HOXA10	0.275	transcription regulator	Activated	3.162	3.132	2.89e-08	ADIPOQ,BCHE,CA3,CDKN1A,CFD,CLDN5,COL15A1,CYP2E1,DHRS9,EGR2,Gstt1,HOXA5,IRX3,MFNG,PTGER3,REM1,SCD,SLC27A1,THRSP
JUN	1.447	transcription regulator		1.011	1.073	3.28e-08	APP,ARTN,ASNS,ATF3,CA3,CCN1,CCN2,CD274,CDKN1A,CFD,EPHX2,EREG,FABP4,FOS,FRZB,GADD45A,GPT,HOMER1,ITGB8,JUN,LGR5,MAFA,MMP2,PLAUR,SCD,SERPINE1,SNCG,SPP1,TF,TNC,XYLT1
TEAD4	-1.23	transcription regulator	Activated	2.742	2.792	3.8e-08	ADIPOQ,CCN1,CCN2,CDKN1A,CEBPA,CIDEC,COL5A2,DGAT2,FABP4,HIF1A,JUN,PLIN1,PPARG,SDC2
FOXO1	-0.39	transcription regulator		1.214	1.27	4.09e-08	Acan,ADIPOQ,Apoc3,CCN2,CDKN1A,CERS4,CLDN5,COL2A1,EGR1,EGR2,FABP4,FABP5,FASN,FGF21,FOS,GADD45A,HIF1A,JUN,KLK3,LEP,MAFA,MYOG,PCK2,PNPLA2,PPARG,SCD,SERPINE1,Slc25a1,SOX9,TRIB3,TRIM63
Mt1	0.614	other		-0.077	-0.124	4.37e-08	ATF3,CEBPA,FOS,GPT,Gstt1,JUN,LEP,SERPINE1
OSM		cytokine	Activated	2.817	2.864	5.25e-08	ABCC1,AQP7,ARTN,ASNS,ATF3,CA6,CDKN1A,CEBPA,COL2A1,EGR1,FASN,FOS,HBEGF,HIF1A,HLA-A,HP,HSD11B1,JUN,LRG1,LRRFIP1,MGLL,MMP2,MPP2,NEDD4L,PPARG,RUNX1,SERPINA3,SERPINE1,SLC16A3,SLPI,SPP1,TNC,TNFRSF11B	Ap1,CTNNB1,EGR1,ELK1,ERK1/2,FOXO3,HIF1A,IL6,LIF,NFkB (complex),OSM,PPARG,SMAD1,SMAD3,SMAD4,SP1,SREBF1,TGFB1,ZFP36
SB203580		chemical - kinase inhibitor	Inhibited	-3.478	-3.578	5.75e-08	Acan,ADIPOQ,ATF3,CCN2,CD109,CD274,CDKN1A,CLDN5,CYP26B1,EGR1,EREG,FOS,GADD45A,HAPLN1,HIF1A,JUN,MMP2,MSTN,MYH11,MYOG,PLAUR,PPARG,RETN,RUNX1,SERPINE1,SLPI,SPP1,TNFRSF11B,XYLT1	AGT,Ap1,CTNNB1,EGR1,ELK1,ERK1/2,FOXO3,HIF1A,IL6,NFkB (complex),PPARG,RAC1,SB203580,SMAD1,SMAD3,SMAD4,SP1,SRC,SREBF1,TNF,nitric oxide
EGF	0.85	growth factor	Activated	2.941	3.02	5.94e-08	ARTN,ATF3,CCN1,CCN2,CDH11,CDKN1A,EGR1,EGR2,EREG,ERRFI1,FASN,FOS,GADD45A,GDF15,HBEGF,HIF1A,IGFALS,JUN,KLK3,MMP2,MYOG,PLAUR,PPARG,PTTG1,RUNX1,SCD,SERPINA3,SERPINE1,SPP1,TF,TNC,VCAN	Ap1,CTNNB1,EDN1,EGF,EGR1,ELK1,ERK,FOXO3,HIF1A,IL6,LIF,NFkB (complex),PPARG,SMAD3,SMAD4,SP1,SREBF1,STAT6,TGFB1,ZFP36
IFNG		cytokine		1.519	1.586	6.04e-08	ABCC1,ADCY5,ADCY7,ADIPOQ,ALDH1L1,APP,ASNS,ATF3,C2,CCN2,CD274,CDKN1A,CEBPA,CHAC1,COL5A2,CYP2E1,DIO1,DLL1,EGR1,EGR2,F2R,FABP5,FASN,FCGR2A,FGF1,FOS,GBP6,GDF15,GJA5,GPT,Gvin1 (includes others),H4C9,HBEGF,HCAR2,HIF1A,HLA-A,Ifitm1,JUN,LEP,MAFA,MMP2,MYOG,NOS1,NOX4,PLAAT3,PLAUR,PPARG,PRNP,SERPINE1,SLC16A3,SLC7A11,SLPI,SPON1,SPP1,TAC1,Tgtp1/Tgtp2,TIMP4,TMOD1,TNFRSF11B
fenofibrate		chemical drug		-1.245	-1.21	6.57e-08	ADIPOQ,Apoc3,APP,ASNS,DBI,DGAT2,FABP4,FASN,FGF21,GADD45A,HIF1A,HP,JUN,MGLL,MSTN,PCK2,PNPLA2,RETN,SCD,SERPINE1,SLC27A1,TRIM63
progesterone		chemical - endogenous mammalian		1.768	1.797	6.8e-08	ADIPOQ,ATF3,CA3,CDH11,CDKN1A,CES1,CFD,CIDEC,CLDN5,COL15A1,CYP2E1,EGR1,ERRFI1,F2R,FOS,Gstt1,H19,HBEGF,HIF1A,HSD11B1,JUN,KLK3,LGR5,LIPE,MCM6,MMP2,PLIN4,PPARG,PRNP,PTGER3,REM1,RETN,SCD,SLC27A1,SPP1,STEAP1,THRSP
MRTFA	0.056	transcription regulator		1.719	1.734	7.26e-08	CCN1,CCN2,CDC42EP2,CNN1,EGR1,F2R,FOS,GADD45A,HLA-A,Ifitm1,MYH11,OSTN,P2RX1,RUNX1,SERPINE1,SLPI,TNC,TST
Ca2+		chemical - endogenous mammalian		1.321	1.384	7.91e-08	Acan,Ank2,APP,ATF3,CCN1,CDKN1A,COL2A1,EGR1,FABP4,FABP5,FASN,FOS,HBEGF,HOMER1,JUN,NOS1,PPARG,PTTG1,SERPINE1,SPP1,TAC1
homocysteine		chemical - endogenous mammalian		1.715	1.75	8.53e-08	ADM2,ATF3,CDKN1A,CLDN5,FGF1,GADD45A,HCAR2,LEP,MMP2,PON1,RETN,TRIB3
NR3C1	0.046	ligand-dependent nuclear receptor		-0.878	-0.868	9.16e-08	APP,CARD10,CCN1,CDKN1A,CEBPA,CIDEC,CLDN5,DBI,DGAT2,DPP7,EGR1,ERRFI1,F2R,FABP4,FGF21,FOS,GADD45A,GEM,HCAR2,HSD11B1,IGFALS,IP6K3,JUN,KLK3,LEP,LGALS12,PAK6,PC,PCK2,PNPLA2,PPARG,RASD1,SERPINE1,SPP1,TAC1,Tgtp1/Tgtp2,TNFRSF11B,TRIB3,Trim30a/Trim30d
FOXC2	0.614	transcription regulator		-0.224	-0.175	9.37e-08	ADIPOQ,ADRB3,CEBPA,CFD,DLL1,FABP4,LEP,LIPE,MMP2,PLIN1,PPARG
palmitic acid		chemical - endogenous mammalian		0.404	0.44	1.01e-07	ADIPOQ,ATF3,CCN2,CDKN1A,DGAT2,EPHX2,FABP4,FASN,FGF21,FOS,GDF15,LEP,Orm1 (includes others),PNPLA2,PPARG,RARRES2,SCD,SERPINE1,TRIB3,TRIM63
HRAS	-0.34	enzyme	Activated	2.26	2.291	1.01e-07	Acan,APP,ASNS,CCN1,CCN2,CDKN1A,CNN1,COL2A1,COL5A2,DLL1,EGR1,F2R,FASN,FOS,HIF1A,IRX3,JUN,LIPG,MMP2,MYH11,MYOG,NNAT,PDGFC,PLAAT1,PLAUR,PLOD2,PRNP,PRXL2A,SCD,SERPINA3,SERPINE1,SERPINE2,SPON1,SPP1,TINAGL1,TSPAN6,VCAN	Ap1,CTNNB1,EGR1,ELK1,ERK,ERK1/2,FOXO3,HIF1A,HRAS,Jnk,NFkB (complex),NRG1,PPARG,PRKCB,RAC1,SMAD1,SMAD3,SMAD4,SP1,SRC,STAT6
sodium arsenite		chemical drug	Activated	2.57	2.593	1.14e-07	ABCC1,CDKN1A,CEBPA,EGR1,FABP4,FOS,GADD45A,GPT,HIF1A,JUN,PPARG	Ap1,CTNNB1,EGR1,ELK1,ERK,ERK1/2,FOXO3,HIF1A,Jnk,NFkB (complex),SMAD1,SMAD3,SP1,STAT6,sodium arsenite
NCOA2	0.244	transcription regulator		-0.578	-0.527	1.31e-07	ADIPOQ,CDKN1A,CEBPA,CFD,EGR1,FABP4,FASN,FRZB,HCAR2,KLK3,LIPG,MYOG,PLIN1,PPARG
APOE	-1.768	transporter		-0.99	-1.047	1.38e-07	ADIPOQ,Apoc3,APP,ATF3,BCAM,C2,CCN1,CCN2,EGR1,F2R,FOS,HSD11B1,JUN,LEP,LIPG,LTBP2,MMP2,NOX4,PC,PCDHGC4,PPARG,SERPINA3,SERPINE1,SPP1
SIRT1	0.132	transcription regulator		-0.127	-0.171	1.41e-07	ADIPOQ,Apoc1,CDKN1A,ERO1A,FABP4,FASN,FGF21,GADD45A,GBP6,HIF1A,HLA-A,HOXA5,LEP,LTBP2,MMP2,MYOG,NEDD4L,PC,PCK2,RBPJL,SERPINE1,SLC36A2,SLC7A10,SLC7A11,Tgtp1/Tgtp2,Trim30a/Trim30d,TRIM63
atorvastatin		chemical drug		-0.411	-0.423	1.41e-07	ABCC1,ADIPOQ,CCBE1,CCN1,CCN2,EGR1,F2R,FOS,JUN,LEP,LIPG,MMP2,NOS1,NOX4,PPARG,PRNP,SERPINE1,SPP1
UCP1		transporter	Activated	3.183	3.201	1.5e-07	ASNS,CYB5R1,EMB,FASN,FGF21,FUT1,GADD45A,GDF15,LEP,MYOG,PCK2,SERPINE1,SLC3A2,SLC6A9,STAP2,STBD1,TRIB3
EGFR	0.414	kinase		1.468	1.515	1.58e-07	CCN2,CDKN1A,COL5A2,EGR1,EREG,F2R,FASN,FBN1,FOS,GADD45A,HBEGF,HIF1A,HP,JUN,KLK3,MMP2,PLAUR,RUNX1,SERPINA3,SERPINE1,SERPINE2,SLC7A11,SLPI,SOX9,TNC,TNFRSF11B,VCAN
CHRM1		g-protein coupled receptor		1.418	1.448	1.72e-07	CCN1,EGR1,EGR2,FOS,JUN,NOS1
YIPF6	0.199	other		1.165	1.134	1.76e-07	ADRB3,FGF21,LEP,LIPE,PNPLA2
EGR1	1.551	transcription regulator	Activated	2.7	2.766	1.85e-07	APP,ATF3,CDKN1A,COL2A1,EGR1,EGR2,EREG,GADD45A,GALNT3,GDF15,HBEGF,HIF1A,JUN,PDGFC,PNPLA2,PPARG,SERPINE1,SPP1	Ap1,CTNNB1,EGR1,ELK1,ERK,ERK1/2,FOXO3,HIF1A,NFkB (complex),PPARG,RUNX3,SMAD1,SMAD3,SMAD4,SP1,SREBF1,STAT6,TGFB1,TNF,ZFP36
RUNX2	1.059	transcription regulator		1.646	1.686	1.91e-07	CDKN1A,CEBPA,GALNT3,HAPLN1,HIF1A,LEP,LUM,MMP2,MYH11,RUNX1,SERPINE1,SOX9,SPP1,TNFRSF11B
oleic acid		chemical - endogenous mammalian		-1.233	-1.211	1.91e-07	APP,DGAT2,EGR1,FABP4,FASN,FOS,GADD45A,GDF15,PLIN1,PLIN4,RARRES2,SCD,SERPINE1,THRSP
ADAM12	1.528	peptidase		-1.689	-1.713	1.93e-07	ADIPOQ,CCN2,CFD,COL5A2,FBN1,GDF15,GREM1,LUM,MYOG,PPARG,SERPINE1,SERPINE2
TERT	-0.055	enzyme		1.71	1.721	1.96e-07	ASNS,ATF3,CCN2,CDKN1A,COL5A2,EREG,F2R,KLK3,LIPG,MMP2,PDGFC,PLOD2,PRXL2A,SPON1,SPP1
PEBP1	-0.261	other	Inhibited	-3	-2.986	2e-07	ADIPOQ,Aldh1a7,Apoc1,CFD,FASN,PON1,PRKAR2B,RETN,SCD
AHR	-0.192	ligand-dependent nuclear receptor		-0.615	-0.608	2.04e-07	APP,CDKN1A,CEBPA,COL5A1,COL5A2,COL9A3,DIO1,EGR2,FABP4,FGF21,FOS,GADD45A,HIF1A,HP,JUN,LTBP2,MMP2,PPARG,SCD,SERPINE1,SLC1A4,SPP1,STEAP4,UGT1A6
actinomycin D		biologic drug		-1.31	-1.365	2.09e-07	APP,CCN1,CCN2,CDKN1A,COL2A1,ERRFI1,FASN,FOS,GADD45A,HBEGF,HIF1A,HOMER1,JUN,MMP2,PLAUR,PPARG,SERPINE1,SLC27A1,SPP1,TF
SMAD3	0.913	transcription regulator	Activated	2.761	2.811	2.15e-07	CCN2,CDH11,CDKN1A,CES1,COL2A1,EGR1,EREG,FOS,HBEGF,HP,JUN,KLK3,LUM,MSTN,Orm1 (includes others),PC,SERPINE1,SPON1,SPP1,TF,TNC	Ap1,CTNNB1,EGR1,ELK1,ERK,ERK1/2,FOXO3,HIF1A,NFkB (complex),PPARG,RUNX3,SMAD1,SMAD3,SMAD4,SP1,STAT6,TGFB1,Tgf beta,ZFP36
ERK1/2		group	Activated	3.243	3.305	2.28e-07	ADIPOQ,CCN2,CDKN1A,CEBPA,COL2A1,EGR1,FABP4,FOS,H19,HBEGF,HLA-A,JUN,MMP2,MYOG,NOX4,PLAUR,SERPINE1,SOX9,SPP1,TAC1,TRIM63,VCAN	Ap1,CTNNB1,EGR1,ELK1,ERK,ERK1/2,FOXO3,HIF1A,Jnk,NFkB (complex),PPARG,SMAD1,SMAD3,SMAD4,SP1,SREBF1,STAT6,TGFB1,TNF,ZFP36,nitric oxide
MYC	0.949	transcription regulator		1.559	1.625	2.29e-07	ABCC1,APCDD1,APP,ASNS,CD274,CDKN1A,CEBPA,CIDEC,COL15A1,COL2A1,COL5A1,COL5A2,DBI,EGR1,EGR2,F2R,FABP4,FABP5,FASN,FBN1,FOS,FRZB,GADD45A,GPT,H19,HAPLN1,HIF1A,HLA-A,HOXA5,IRX3,JUN,LEP,LGR5,LOC102724788/PRODH,LUM,MCM6,PLAUR,Rpl29 (includes others),SCD,SERPINE1,SERPINE2,SLC16A3,SLC3A2,SOX17,SOX9,SPP1,TF,Tgtp1/Tgtp2,TNC,TRIM5,UGT1A6
AKT1	0.118	kinase		0.9	0.941	2.45e-07	Acan,CDKN1A,EGR1,FABP5,FASN,FOS,GDF15,Gstt1,HIF1A,LEP,MMP2,MSTN,MYH11,MYOG,NOX4,PPARG,SCD,SERPINE1,SLC3A2,SPP1,TRIM63,VCAN
cytokine		group		1.745	1.816	2.46e-07	AGTR2,APP,CCN1,EGR1,FOS,HIF1A,JUN,LEP,LIPG,MMP2,NOS1,PLAUR,PON1,RETN,SERPINE1
SELENOS	0.394	other	Activated	2.449	2.39	3.13e-07	ADIPOQ,CEBPA,CFD,FABP4,FASN,PPARG
TWNK	0.115	enzyme		-1.633	-1.647	3.13e-07	ASNS,ATF3,FGF21,GDF15,HIF1A,TRIB3
octanoic acid		chemical - endogenous mammalian	Activated	2.415	2.375	3.13e-07	CEBPA,DGAT2,FABP4,FASN,LEP,PPARG
tosedostat		chemical drug	Activated	2.178	2.24	3.36e-07	ASNS,ATF3,CDKN1A,CHAC1,GADD45A,RETN,SLC7A11,TRIB3
ADIPOQ	-3.908	other		-1.202	-1.188	3.41e-07	ACSM5,ADIPOQ,CCN2,CDKN1A,CEBPA,EGR1,FABP4,FASN,FOS,HBEGF,LEP,MMP2,NOX4,PPARG,SCD,SLC27A1
FGF19		growth factor	Activated	2.425	2.423	3.53e-07	EGR1,FABP5,FASN,FOS,GADD45A,LEP,NNAT,PON1,SCD,SERPINA3,SLPI,THRSP
cigarette smoke		chemical toxicant		1.775	1.829	3.58e-07	CCN1,CDKN1A,CYP2E1,EGR1,FABP5,FOS,Gstt1,H19,HIF1A,JUN,LEP,MMP2,NOX4,P2RX1,PPARG,SERPINA3,SERPINE1,SLC1A4,SLC6A9,UGT1A6
ghrelin		biologic drug		-0.594	-0.57	3.58e-07	EGR1,FASN,FOS,SCD
NCOR2	0.23	transcription regulator		0.277	0.261	3.69e-07	ADIPOQ,CDKN1A,CEBPA,DIO1,FOS,HBEGF,JUN,LEP,MMP2,PLIN1
Gsk3		group		-0.356	-0.316	3.93e-07	Acan,CEBPA,COL2A1,FABP4,FASN,FOS,GDF15,HIF1A,JUN,PPARG,SPP1
LIF	1.52	cytokine	Activated	2.245	2.262	4.04e-07	CDKN1A,EGR1,EREG,FFAR2,FOS,GPT,HBEGF,HIF1A,IL34,JUN,LEP,MYOG,PPARG,SERPINA3,SPP1,TAC1,TNC,TNFRSF11B	Ap1,CTNNB1,EGR1,ELK1,ERK,ERK1/2,FOXO3,HIF1A,LIF,MAPK3,NFkB (complex),SMAD1,SMAD3,SP1,STAT6
TO-901317		chemical reagent	Inhibited	-2.226	-2.205	4.15e-07	Apoc1,APP,DIO1,FABP4,FABP5,FASN,FMO1,HP,HSD11B1,LIPG,MCM6,MGLL,Mup1 (includes others),Orm1 (includes others),PPARG,PTGER3,PXMP2,SCD,SERPINA3,THRSP	PPARG,SREBF1,SREBF2,TO-901317
PARPBP	0.124	other		1.134	1.143	4.41e-07	CYP2E1,EMB,PLAAT1,PLOD2,SPON1,TNC,TST
Ngf		group	Activated	2.856	2.903	4.47e-07	AGTR2,APP,CDKN1A,EGR1,FOS,JUN,NOS1,PLAUR,SERPINE1,TAC1	Ap1,CTNNB1,EGR1,ELK1,ERK,ERK1/2,FOXO3,HIF1A,MAP3K1,MAPK3,NFkB (complex),Ngf,SMAD1,SMAD3,SMAD4,SP1,SRC,STAT6,ZFP36,nitric oxide
tamoxifen		chemical drug		0.108	0.115	4.51e-07	CCN1,CDH11,CDKN1A,CYP2E1,F2R,FABP4,FASN,FOS,GDF15,H19,HIF1A,JUN,KLK3,LTBP2,MMP2,NOS1,PPARG,RERG,SCD,SERPINA3,SOX9,SPP1
GW3965		chemical reagent		-0.501	-0.509	4.95e-07	Apoc1,APP,CIDEC,DGAT2,DHRS9,FABP5,FASN,HCAR2,LIPE,PLIN1,PRKAR2B,PTGER3,SCD,THRSP
corticosterone		chemical - endogenous mammalian		1.035	1.048	4.95e-07	APP,CCN2,CDKN1A,CLDN5,FASN,FOS,H19,HSD11B1,JUN,LEP,LIPE,NOS1,NOX4,PNPLA2
TP53	0.203	transcription regulator		1.712	1.727	5.6e-07	ABCC1,ACSM5,ACSS2,ADRB3,APP,ASNS,ATF3,C2,CARD10,CCN1,CCN2,CDKN1A,CEBPA,CNN1,COL2A1,COL5A2,COL9A1,CRACR2B,CYP26B1,DBI,DHRS9,EDIL3,EGR1,EGR2,F2R,FABP4,FABP5,FASN,FMO1,FOS,FUT1,GADD45A,GDF15,GPR4,H19,HBEGF,HIF1A,Irs3,JUN,KCNK3,KLK3,LGR5,LOC102724788/PRODH,MCM6,MMP2,NEO1,NOS1,NOX4,ORAI2,PLAAT1,PLAAT3,PLAUR,PLOD2,PPARG,PRNP,PTTG1,ROBO1,RUNX1,SCD,SERPINA3,SERPINE1,SERPINE2,SLPI,SPP1,TINAGL1,TMOD1,TNC,T…
mifepristone		chemical drug	Inhibited	-2.139	-2.165	6.1e-07	Acan,ADIPOQ,ATF3,CCN2,CDKN1A,COL15A1,COL2A1,COL5A2,EGR1,EGR2,FOS,HBEGF,HSD11B1,JUN,KLK3,NOX4,PC,REM1,ROBO1,SERPINE1,SOX17,SPP1,VCAN	AGT,Ap1,CTNNB1,EGR1,ELK1,ERK,ERK1/2,FOXO3,HIF1A,Jnk,NFkB (complex),OSM,PPARG,SMAD1,SMAD3,SMAD4,SP1,SRC,SREBF1,STAT6,TNF,mifepristone
MED13	0.152	transcription regulator		1.414	1.384	6.44e-07	AACS,Apoc1,CIDEC,FASN,PPARG,PRKAR2B,SCD,THRSP,TMEM45B
IL1		group		1.839	1.905	6.66e-07	APP,C2,CDKN1A,COL2A1,EGR1,FOS,GDF15,H19,HIF1A,HP,HSD11B1,JUN,LEP,MMP2,PPARG,SERPINE1,SOX9,TAC1,TNC,TNFRSF11B,VCAN
GH1		growth factor		1.834	1.846	6.95e-07	ABCC1,ADRB3,ATF3,CEBPA,DBI,EGR1,FASN,FOS,GADD45A,IGFALS,JUN,RETN,SPP1
Pdgf (complex)		complex	Activated	2.079	2.126	7.13e-07	CDKN1A,EGR1,ERRFI1,FOS,HIF1A,JUN,MCM6,MMP2,NOX4,PLAUR,PPARG,SERPINE1	ATF4,Ap1,CTNNB1,EDN1,EGR1,ELK1,ERK,ERK1/2,FOXO3,HIF1A,Jnk,MAPK3,NFkB (complex),PRKCD,Pdgf (complex),SMAD1,SMAD3,SMAD4,SP1,SRC,STAT6,hydrogen peroxide
SP1	0.142	transcription regulator	Activated	2.376	2.463	7.13e-07	ASNS,ATF3,CCN2,CDKN1A,CEBPA,CES1,COL2A1,EGR1,EREG,F2R,FASN,FOS,GDF15,HBEGF,HIF1A,JUN,MMP2,MYH11,NOS1,NOX4,PDGFC,PLAUR,PRKAR2B,PRNP,PTTG1,SERPINE1,SERPINE2,SNCG,SOX9,SPP1,TIMP4,TNC	Ap1,CTNNB1,EGR1,ELK1,NFkB (complex),SMAD1,SMAD3,SMAD4,SP1
NFkB (complex)		complex	Activated	2.054	2.15	7.45e-07	APP,ATF3,CARD10,CCN1,CCN2,CD274,CDKN1A,COL2A1,DIO1,EGR1,FABP5,FGF1,FOS,GADD45A,GDF15,HIF1A,HLA-A,ITGB8,JUN,MMP2,MSTN,NOS1,PPARG,RUNX1,SERPINA3,SERPINE1,SLC16A3,SLPI,SPP1,TAC1,TNFRSF11B,TRIB3	Ap1,CTNNB1,EGR1,ELK1,FOXO3,HIF1A,IL6,Jnk,NFkB (complex),PPARG,PRKCD,RUNX3,SMAD3,SMAD4,SP1,SREBF1,TGFB1,TNF,ZFP36,nitric oxide
tributyltin		chemical reagent		-1.87	-1.87	7.71e-07	CA3,CCN2,CEBPA,CIDEC,COL5A1,CYP26B1,DGAT2,FABP4,FGF21,LEP,PLIN4,PPARG,STAC2,TNC
clopidogrel		chemical drug	Activated	2.54	2.552	7.75e-07	ALDH1L2,ASNS,ATF3,CHAC1,COL5A1,HOXA5,PCK2,SLC1A4,SLC3A2,TRIB3
KLF15	-0.583	transcription regulator	Inhibited	-2.706	-2.67	7.97e-07	CCN2,DGAT2,FABP5,FASN,PPARG,PXMP2,SCD,SLC27A1,TRIM63
Rock		group		1.231	1.259	7.97e-07	APP,CCN2,CDKN1A,CNN1,FABP4,FOS,PPARG,SOX9,SPP1
SP600125		chemical - kinase inhibitor	Inhibited	-2.14	-2.173	8.06e-07	ATF3,CCN1,CCN2,CDKN1A,CHAC1,CIDEC,EGR1,EMB,FABP5,FASN,FGF1,FOS,GADD45A,JUN,MYOG,PCK2,PPARG,SCD,SERPINE1,SOX17,SPP1,TRIB3	Ap1,CDC42,CTNNB1,EGR1,ELK1,ERK1/2,FAS,FOXO3,HIF1A,MAP2K4,MAP3K1,MAPK3,NFkB (complex),PPARG,SMAD1,SMAD3,SMAD4,SP1,SP600125,TGFB1,Tgf beta,ZFP36
EPCAM		other	Inhibited	-2.425	-2.434	8.76e-07	ATF3,CDKN1A,EGR1,FABP5,FOS,JUN	Ap1,CTNNB1,EGR1,ELK1,EPCAM,ERK1/2,HIF1A,NFkB (complex),SMAD1,SMAD3,SP1
FOS	1.296	transcription regulator		-0.854	-0.821	8.86e-07	ABCC1,ATF3,CCN2,CERS4,CFD,CHODL,EGR1,EGR2,EMB,EPHX2,EREG,FABP4,FASN,FBN1,FOS,FRZB,JUN,KIRREL3,LTBP2,MMP2,PLAUR,PTTG1,RUNX1,SCD,SERPINE1,SERPINE2,SLPI,SNCG,SPP1,TAC1,TNFRSF11B,XYLT1
PI3K (complex)		complex		1.36	1.424	9.28e-07	AQP7,ATF3,CCN2,CD274,CDKN1A,FABP5,FOS,H19,HBEGF,HIF1A,JUN,LEP,LTBP2,MAFA,MMP2,NOX4,PRKAR2B,SERPINE1,SNCG,SOX9,SPP1
EPAS1	-1.604	transcription regulator		0.699	0.758	9.29e-07	ADIPOQ,CCN1,CCN2,CD274,CDKN1A,CEBPA,DGAT2,FABP4,FASN,FOS,HIF1A,HOXA5,Irs3,LEP,PLOD2,PPARG,SERPINE1,SOX9,TNFRSF11B
testosterone		chemical - endogenous mammalian		1.096	1.143	9.79e-07	ADIPOQ,CA3,CDKN1A,CYP26B1,CYP2E1,EGR1,FABP4,FOS,GADD45A,HIF1A,JUN,KLK3,LEP,MSTN,MYOG,NOS1,P2RX1,PPARG,SLC25A10,SLC6A9,TF,TNFRSF11B,TRIM63,VCAN
EIF2S1	0.307	translation regulator				9.8e-07	ADM2,ALDH1L2,CA6,CHAC1,HHIPL1,PLIN4,SLC6A9,SLC7A11,TRIB3
KDM3A	0.13	transcription regulator		1.941	2	9.97e-07	CCN1,CCN2,GDF15,LEP,MYH11,PLOD2,SERPINE1,TNC
(5-(4-N-methyl-N(2-pyridyl)amino)ethoxy)benzyl thiazolidine-2,4-dione		chemical reagent	Inhibited	-2.236	-2.194	1.01e-06	CIDEC,FABP4,PC,SCD,SLC27A1
GDF2		growth factor	Activated	2.201	2.276	1.06e-06	CDH11,COL9A1,COL9A3,EMB,FOS,GJA4,HIF1A,NOG,PROX1,SERPINE2,SLC3A2,SPP1
EDN1	-0.585	cytokine	Activated	3.37	3.443	1.08e-06	ADIPOQ,CCN1,CCN2,COL5A1,EGR1,EREG,ERRFI1,FOS,HBEGF,HIF1A,JUN,LEP,MMP2,PLAUR,SERPINE1,TNC,VCAN	Ap1,CTNNB1,EDN1,EGR1,ELK1,ERK,ERK1/2,FOXO3,HIF1A,HRAS,IL6,Jnk,NFkB (complex),PPARG,RAC1,SMAD1,SMAD3,SMAD4,SP1,SREBF1,STAT6,TGFB1,ZFP36
PTHLH	1.003	other		1.417	1.436	1.09e-06	Acan,CDKN1A,COL2A1,FOS,HAPLN1,RUNX1,SERPINE1,SOX9,TNC,TNFRSF11B
XDH	-1.253	enzyme		0.213	0.211	1.28e-06	CCN2,CEBPA,HIF1A,MMP2,PLAUR,PPARG,SERPINE1,SPP1
LIPE	-3.382	enzyme		-0.895	-0.874	1.3e-06	ACSS2,ADIPOQ,ATF3,CDO1,CEBPA,EGR1,FABP4,FASN,FOS,PC,PPARG,SCD,SOX18,THRSP
Pdgf Ab		complex		1.732	1.776	1.37e-06	EREG,FOS,HBEGF,HIF1A,MYOG,SCD
FGF21	4.225	growth factor		-0.25	-0.221	1.46e-06	ADIPOQ,DGAT2,EGR1,FASN,FOS,KLB,LEP,SERPINE1,Slc25a1
RETN	-3.432	other		-0.505	-0.468	1.46e-06	CCN2,FABP4,FABP5,FASN,FOS,RETN,SCD,SERPINE1,SPP1
nicotine		chemical drug	Activated	2.362	2.408	1.48e-06	AGTR2,CCN2,CDKN1A,CYP2E1,DBI,EGR1,FASN,FOS,GJA4,HIF1A,HOMER1,LEP,MMP2,PLAUR,SERPINE1,SPP1	Ap1,CTNNB1,EGR1,ELK1,ERK,ERK1/2,FOXO3,HIF1A,IL6,Jnk,MAP3K1,MAPK3,NFkB (complex),SMAD1,SMAD3,SP1,SRC,SREBF1,STAT6,ZFP36,nicotine,nitric oxide,norepinephrine
bleomycin		chemical drug	Activated	2.179	2.265	1.49e-06	CCN2,CDH11,CDKN1A,CEBPA,F2R,FABP4,FRZB,HBEGF,HIF1A,LTBP2,MMP2,Mup1 (includes others),PTTG1,SERPINE1,SPP1,TIMP4,TINAGL1	Ap1,CTNNB1,EGR1,ELK1,ERK1/2,FOXO3,HIF1A,NFkB (complex),PPARG,SMAD1,SMAD3,SMAD4,SP1,SREBF1,TGFB1,TNF,Tgf beta,ZFP36,bleomycin
ethanol		chemical - endogenous mammalian		0.627	0.664	1.53e-06	ADIPOQ,ATF3,CCN2,CDKN1A,CEBPA,CYP2E1,EGR1,FASN,FOS,GADD45A,GPT,HIF1A,HLA-A,JUN,MMP2,Pde4d,PLIN1,PNPLA2,PPARG,RARRES2,SCD,SERPINE1,SLC7A11,TRIB3
cyclic AMP		chemical - endogenous mammalian		1.808	1.875	1.53e-06	AOC3,APP,CCN2,CDKN1A,CEBPA,EGR1,EGR2,FOS,HBEGF,HIF1A,JUN,LEP,NOS1,PRKAR2B,PRNP,SERPINE1,SOX9,TF,THRSP
NEDD9	0.836	other	Activated	2.53	2.528	1.54e-06	ACSS3,APP,DUSP26,ERRFI1,FOS,GDF15,MAL2,MMP2,PLOD2,SERPINE1,TF
NCOR1	-0.351	transcription regulator		0.378	0.347	1.55e-06	ADIPOQ,CDKN1A,CEBPA,DBI,DIO1,FASN,HP,KLK3,MYOG,PLIN1,PPARG,THRSP
CR1L	0.215	other	Inhibited	-2.607	-2.66	1.67e-06	CCN2,COL15A1,COL5A1,FBN1,LUM,SERPINE1,TNC
TRIB3	3.1	kinase		-0.415	-0.442	1.67e-06	ASNS,CEBPA,FABP4,GDF15,PCK2,PPARG,TRIB3
AMPK		complex		0.901	0.911	1.75e-06	AACS,ADIPOQ,CDKN1A,EGR1,FASN,HIF1A,MSTN,NOX4,PLIN1,PPARG,SERPINE1,THRSP
THRB	-0.087	ligand-dependent nuclear receptor		-1.181	-1.173	1.79e-06	CEBPA,CFD,DIO1,FABP4,FASN,FGF21,FOS,FRZB,GJA5,HIF1A,JUN,MMP2,PLIN1,PPARG,PTTG1,SERPINE1,SLC7A11,Spaar,SPP1,THRSP
NR0B2		ligand-dependent nuclear receptor		-1.416	-1.464	1.79e-06	CCN2,CDKN1A,EGR1,FASN,GPT,PCK2,PPARG,SCD,SERPINE1,SPP1
EPHB1	-0.602	kinase	Activated	2.216	2.269	1.98e-06	EGR1,EGR2,FOS,JUN,SERPINE1	Ap1,CTNNB1,EGR1,ELK1,EPHB1,ERK,ERK1/2,FOXO3,HIF1A,Jnk,MAPK3,NFkB (complex),SMAD1,SMAD3,SP1,STAT6
PARP2	-0.191	enzyme	Inhibited	-2.224	-2.192	1.98e-06	ADIPOQ,FABP4,FASN,LEP,PPARG
IRS2	0.111	enzyme		0.34	0.344	2.04e-06	CEBPA,EGR1,FABP4,FASN,FOS,LEP,PPARG,THRSP
ursolic acid		chemical drug		0	-0.027	2.13e-06	ATF3,CDKN1A,FASN,FOS,GDF15,LEP,MMP2,PPARG,SLC6A9
LPIN1	-1.541	phosphatase		-0.009	0.004	2.24e-06	CDKN1A,CEBPA,FABP4,FASN,PPARG,RETN,SCD
TP63	-0.789	transcription regulator		-0.134	-0.088	2.26e-06	ARL14EP,CCN1,CCN2,CDKN1A,CEBPA,COL5A1,DLL1,F2R,FASN,FBN1,FGF21,FOS,FUT1,GADD45A,GLB1L2,GREM1,HBEGF,ITGB8,KLK3,PRNP,RUNX1,SERPINE1,SLC7A11,SOX9,SPON1,TINAGL1,TNC
epigallocatechin-gallate		chemical drug		-1.264	-1.289	2.38e-06	APP,CCN1,CCN2,CDKN1A,CEBPA,CLDN5,EGR1,FOS,GADD45A,HIF1A,JUN,KLK3,LEP,MMP2,NOS1,SERPINE1,TAC1
lysophosphatidylcholine		chemical - other		1.019	1.073	2.44e-06	CD274,EGR1,FABP5,FASN,HBEGF,JUN,PLAUR,PPARG,SCD,SERPINE1
dalfampridine		chemical drug	Activated	2.813	2.873	2.55e-06	APP,ATF3,CCN1,EGR1,EGR2,FOS,JUN,KCNA5	MAP2K4,NFkB (complex),dalfampridine
norepinephrine		chemical - endogenous mammalian	Activated	2.88	2.931	2.6e-06	ADRB3,APP,CCN2,EGR1,FGF21,FOS,GDF15,GEM,HHIP,LEP,MMP2,PPARG,SERPINE1,THRSP,TINAGL1	Ap1,CTNNB1,EGR1,ELK1,ERK,FOXO3,HIF1A,IL1A,IL6,Jnk,NFkB (complex),PPARG,PRKCB,PRKCD,SMAD3,SP1,SREBF1,STAT6,TNF,norepinephrine
F2		peptidase	Activated	2.942	3.033	2.64e-06	ADIPOQ,CCN1,CCN2,CDKN1A,DHRS9,EGR1,EREG,F2R,FOS,GREM1,HBEGF,HIF1A,JUN,MGLL,MMP2,MYH11,MYOG,PLAUR,SERPINE1	Ap1,CTNNB1,EDN1,EGR1,ELK1,ERK,ERK1/2,F2,F2R,FGF2,FOXO3,HIF1A,NFkB (complex),PPARG,Pdgf (complex),SMAD1,SMAD3,SMAD4,SP1,SRC,STAT6,TGFB1,ZFP36,lysophosphatidic acid
STAT3	0.223	transcription regulator		0.454	0.509	2.67e-06	ADIPOQ,CCN2,CD274,CDKN1A,CEBPA,COL5A1,DLL1,EGR1,EGR2,FASN,FFAR2,FOS,GADD45A,GBP6,HIF1A,HLA-A,HP,KLK3,LEP,MMP2,MYOG,PLAUR,PTTG1,RUNX1,SERPINA3,SERPINE1,SERPINE2,SMAD9,Tgtp1/Tgtp2,TRIM5,VCAN
doxorubicin		chemical drug	Activated	3.953	3.992	2.7e-06	ABCC1,APP,ASNS,ATF3,CCN1,CCN2,CD274,CDKN1A,EGR1,FOS,GADD45A,GDF15,HBEGF,HIF1A,Irs3,JUN,LOC102724788/PRODH,MMP2,NOX4,PTTG1,RUNX1,SDC2,SOX9,SPP1,TSPAN8	Ap1,CTNNB1,EGR1,ELK1,ERK,ERK1/2,FOXO3,HIF1A,IL6,Jnk,MAP2K1/2,NFkB (complex),RUNX3,SMAD1,SMAD3,SMAD4,SP1,SREBF1,STAT6,doxorubicin
NGF	-1.395	growth factor	Activated	2.605	2.656	2.77e-06	APP,ATF3,CDKN1A,EGR1,EGR2,ERRFI1,FOS,GADD45A,JUN,KLK3,LRRFIP1,MMD,MMP2,NOS1,PLAUR,PPARG,TAC1	Ap1,BDNF,CTNNB1,EGR1,ELK1,ERK,FOXO3,HIF1A,IL6,Jnk,MAP2K1/2,MAPK3,NFkB (complex),NGF,SMAD3,SP1,SRC,SREBF1,STAT6
FBN1	1.712	other		-1.446	-1.492	3.05e-06	CCN1,CCN2,FBN1,MMP2,PPARG,SERPINE1
TGFB1I1	-0.087	transcription regulator		-0.273	-0.257	3.05e-06	CDKN1A,FOS,KLK3,LTBP2,NOX4,SERPINE1
MET	-0.216	kinase		0.885	0.928	3.29e-06	CD274,CDKN1A,COL5A2,FOS,HBEGF,JUN,MMP2,MYOG,NOX4,PTPRT,RUNX1,SPP1,TRIM63
Atrial Natriuretic Peptide		group		-1.342	-1.363	3.56e-06	ADIPOQ,CCN2,LEP,SERPINE1,TNC
PPP3CB	0.461	phosphatase		0.119	0.105	3.56e-06	CDKN1A,GADD45A,NOX4,RUNX1,TRIM63
SLC2A1	-0.003	transporter		-0.067	-0.091	3.56e-06	ALDH1L2,DHRS9,MMP2,SERPINE1,SLC7A11
TAS1R3	-0.647	g-protein coupled receptor		-0.13	-0.154	3.56e-06	CEBPA,PPARG,SLC3A2,SLC7A11,SLC7A3
PRKCB	0.097	kinase	Activated	2.007	2.047	3.61e-06	ADRB3,APP,CDKN1A,EGR1,FASN,FOS,JUN,MMP2,SERPINE1	Ap1,CTNNB1,EGR1,ELK1,ERK1/2,FAS,HIF1A,Jnk,MAPK3,NFkB (complex),PRKCB,PRKCD,SMAD1,SMAD3,SP1,SRC,nitric oxide
anisomycin		chemical - endogenous non-mammalian		1.905	1.929	3.61e-06	ATF3,CDKN1A,EGR1,FOS,HIF1A,JUN,PLAUR,SERPINE1,SPP1
D-fructose		chemical - endogenous mammalian		-2	-1.94	3.89e-06	ADIPOQ,CEBPA,FABP4,FASN,HP,MMP2,PPARG,SCD
PRMT5	0.113	enzyme		-1.846	-1.854	3.89e-06	ADIPOQ,CEBPA,FABP4,FASN,KLK3,LEP,PPARG,RETN
ERBB4	-1.004	kinase		0	0.003	3.89e-06	CDKN1A,COL5A2,EGR1,GADD45A,HBEGF,HIF1A,JUN,SERPINA3,SERPINE2,SLPI,TNC
NKX2-1		transcription regulator		-1.698	-1.667	3.94e-06	AGTR2,CEBPA,COL9A1,EDIL3,ESAM,HLA-A,LRG1,MMP2,MYH11,PC,PON1,RBPJL,SCD,SERPINE1,SOX17,TNC
IL10RA	0.726	transmembrane receptor		0.986	0.991	4.17e-06	ACSS2,CCN1,CERS4,Ces1f,ERO1A,FABP5,FBN1,GBP6,HCAR2,HLA-A,KLK3,LGALS12,LRG1,LRIG3,LUM,PLAAT3,SLC16A3,SLC7A11,SPON1,Sult1a1,TAC1,Tgtp1/Tgtp2
GW501516		chemical drug				4.41e-06	ADIPOQ,CDKN1A,CFD,COL5A1,FASN,LIPE,LIPG,Orm1 (includes others),SCD,SLC27A1,SLPI,SNCG
THRA	-0.102	ligand-dependent nuclear receptor		0.391	0.392	4.44e-06	APP,CDKN1A,CEBPA,DIO1,FASN,FOS,FRZB,JUN,MAFA,PPARG,PTTG1,SERPINE1,THRSP
NR1I2		ligand-dependent nuclear receptor		-0.607	-0.591	4.95e-06	Aldh1a7,Apoc1,CDKN1A,CEBPA,CES1,EGR1,FASN,JUN,Mup1 (includes others),PPARG,SCD,TF,TNFRSF11B,UGT1A6
isoproterenol		chemical drug		1.658	1.711	4.95e-06	ADCY5,ADIPOQ,ADRB3,APP,ATF3,FGF21,FOS,JUN,LEP,LGALS12,MMP2,OSTN,PRNP,SCD
PDX1		transcription regulator		1.207	1.228	4.95e-06	ASNS,ATF3,CDO1,EGR1,ERO1A,FGF1,FUT1,JUN,MAFA,NNAT,PC,PTGER3,Slc25a1,SPP1,TRIB3,TSPAN8
Mek		group		0.863	0.889	4.95e-06	CCN2,CDKN1A,EGR1,EGR2,EREG,FASN,FOS,GDF15,HIF1A,HOMER1,JUN,LEP,MMP2,NOX4,RUNX1,SERPINE1,SNCG
BCL2	-0.403	transporter		0.701	0.73	4.98e-06	ABCC1,Acan,CDKN1A,COL2A1,FOS,GADD45A,HIF1A,MMP2,NNAT,PLAUR,SOX9
CDC42		enzyme	Activated	2.236	2.263	4.99e-06	ATF3,CCN2,COL2A1,FOS,JUN,MYOG,SOX9	Ap1,CDC42,CTNNB1,EGR1,ELK1,ERK1/2,HIF1A,MAP2K4,MAP3K1,NFkB (complex),PPARG,RAC1,SMAD1,SMAD3,SMAD4,SP1,ZFP36
eplerenone		chemical drug	Inhibited	-2.582	-2.63	4.99e-06	ADIPOQ,CCN2,MMP2,NOX4,PPARG,SERPINE1,SPP1
6-cyano-7-nitroquinoxaline-2,3-dione		chemical reagent		-1.729	-1.771	5.17e-06	EGR1,FOS,GFRA1,JUN
deferoxamine		chemical drug	Activated	2.582	2.628	5.34e-06	APP,CDKN1A,FASN,FOS,GADD45A,GDF15,GEM,HIF1A,JUN,LEP,MMP2,PLAUR,PPARG,SERPINE1,SERPINE2,SPP1	Ap1,CTNNB1,EGR1,ELK1,ERK,ERK1/2,FOXO3,HIF1A,Jnk,NFkB (complex),PPARG,SMAD1,SMAD3,SMAD4,SP1,SRC,STAT6,deferoxamine
wortmannin		chemical - kinase inhibitor	Inhibited	-2.522	-2.572	5.34e-06	ATF3,CCN2,CDKN1A,CIDEC,CYP2E1,EGR1,F2R,FASN,FOS,HAPLN1,HIF1A,JUN,LEP,MMP2,MYH11,SERPINE1	AGT,Ap1,CTNNB1,EGR1,ELK1,ERK,FOXO3,HIF1A,HRAS,IL6,MAP2K1/2,NFkB (complex),PRKCB,RAC1,SMAD3,SMAD4,SP1,SRC,SREBF1,STAT6,wortmannin
NRG1		growth factor	Activated	2.331	2.383	5.36e-06	ARTN,CCN1,CCN2,CDKN1A,EGR1,EGR2,ERRFI1,FABP5,FGF1,FOS,HIF1A,JUN,KLK3,MGLL,MYOG,PLAUR,RUNX1,SERPINE1,TF	Ap1,CTNNB1,EGF,EGR1,ELK1,ERK,ERK1/2,FOXO3,HIF1A,Jnk,MAPK3,NFkB (complex),NRG1,RAC1,SMAD1,SMAD3,SP1,SRC,SREBF1,STAT6
H89		chemical - kinase inhibitor	Inhibited	-2.467	-2.53	5.41e-06	ADIPOQ,APP,CDKN1A,COL2A1,EGR1,EGR2,EREG,FGF21,FOS,HAPLN1,MMP2,NOS1,RUNX1,SERPINE1	Ap1,CTNNB1,EGR1,ELK1,ERK,ERK1/2,FOXO3,H89,HIF1A,HRAS,IL6,Jnk,MAPK3,NFkB (complex),SMAD1,SMAD3,SMAD4,SP1,SREBF1,STAT6
ERBB3	-0.599	kinase		1.976	1.981	5.47e-06	CCN1,CCN2,CDKN1A,EGR1,FBN1,HBEGF,HIF1A,HP,SERPINA3,SERPINE1,SLPI,TNC
FOXO4	-0.448	transcription regulator		1.876	1.874	5.47e-06	Acan,CCN2,CDKN1A,CERS4,FABP4,FABP5,FASN,GADD45A,HIF1A,SCD,SERPINE1,SOX9
4-hydroxytamoxifen		chemical drug		1.888	1.936	5.52e-06	ATF3,CCN1,CCN2,CDKN1A,CEBPA,EGR1,ERRFI1,FABP4,FOS,HEBP1,JUN,PAK6,PTTG1,RASD1,TMOD1
FOSL1	-0.502	transcription regulator		-0.047	-0.043	5.92e-06	EGR1,EGR2,FOS,JUN,MMP2,PLAUR,SERPINE1,SERPINE2,TF
FST	-0.671	other	Inhibited	-2.975	-2.954	5.92e-06	ADIPOQ,FABP4,GPAT3,HP,MMP2,MSTN,Mup1 (includes others),PPARG,THRSP
NELFB	-0.244	other	Inhibited	-2.236	-2.245	5.98e-06	ATF3,CCN2,CDKN1A,GADD45A,Ifi27l2a/Ifi27l2b
Ncoa6	0.284	transcription regulator				5.98e-06	FABP4,FASN,FOS,SCD,SERPINE1
CCN3	3.557	growth factor		-0.239	-0.252	6.11e-06	CCN2,GREM1,MMP2,MYOG,PDGFC,SERPINE1
selenomethylselenocysteine		chemical - endogenous mammalian		-1.664	-1.694	6.11e-06	ABCC1,CES1,EGR1,FABP4,JUN,PLAUR
MRTFB	-0.233	transcription regulator		1.849	1.879	6.48e-06	CCN1,CCN2,CNN1,COL5A2,EGR1,F2R,GADD45A,HLA-A,Ifitm1,P2RX1,RUNX1,SDC2,SERPINE1,SLPI,TST
SPIB	-0.244	transcription regulator		1.938	2.005	6.63e-06	ATF3,COL2A1,DLL1,EGR1,EGR2,GEM,KLK3,LGR5,LRRFIP1,TNFRSF11B
SREBF2	0.107	transcription regulator	Inhibited	-2.57	-2.512	6.63e-06	AACS,ACSS2,CDKN1A,DBI,FABP5,FASN,PPARG,RARRES2,SCD,THRSP	PPARG,SREBF1,SREBF2
caffeine		chemical drug		-0.193	-0.193	6.93e-06	CCN2,CDKN1A,CEBPA,EGR1,FASN,FOS,HIF1A,PPARG,TAC1
15-deoxy-delta-12,14 -PGJ 2		chemical - endogenous mammalian		-0.328	-0.354	7.01e-06	CCN2,CDKN1A,EGR1,FABP4,FOS,GADD45A,GDF15,JUN,KLK3,MYH11,MYOG,NOX4,PPARG,SERPINE1,SPP1
cyclosporin A		biologic drug		-0.784	-0.82	7.05e-06	AGTR2,APP,ASNS,ATF3,CCN2,CDH11,CDKN1A,EDIL3,EGR1,EGR2,FASN,FCGR2A,FOS,HIF1A,JUN,KCNA5,KCNK3,MMP2,MYH11,NOS1,RUNX1,SCD,SERPINE1,SPP1,TSPAN8
IRS1	-0.543	enzyme		-1.551	-1.525	7.16e-06	ADIPOQ,CEBPA,EGR1,FABP4,FASN,FMO1,FOS,GLRB,LEP,PPARG,SPP1,TRIB3,TRIM63
IL1A		cytokine	Activated	2.495	2.557	7.5e-06	APP,ATF3,CCN1,CD274,CDKN1A,CYP2E1,FOS,HSD11B1,JUN,LEP,MMP2,PPARG,SERPINA3,SERPINE1,SPP1,TAC1,TNFRSF11B	Ap1,CTNNB1,EGR1,ELK1,ERK1/2,FOXO3,HDAC6,HIF1A,HRAS,IL1A,IL6,MAP2K4,MYD88,NFkB (complex),PPARG,SMAD1,SMAD3,SMAD4,SP1,SREBF1,TNF,nitric oxide
CTF1	-0.741	cytokine		0.896	0.918	8.06e-06	FASN,FOS,LEP,MYH11,PNPLA2,PPARG,SERPINA3
TSC22D3	0.509	transcription regulator		0.685	0.671	8.4e-06	ADIPOQ,CD274,CDKN1A,CEBPA,EDIL3,EGR2,LEP,PPARG
desoxycorticosterone		chemical - endogenous mammalian		1.989	2.029	9.53e-06	CCN2,FOS,NOX4,SERPINE1,SPP1
epoprostenol		chemical - endogenous mammalian		1.452	1.487	9.53e-06	EGR1,FOS,HIF1A,SERPINE1,SPP1
CSF1	0.237	cytokine		1.355	1.417	9.66e-06	APP,CDKN1A,CEBPA,EGR1,EGR2,F2R,FCGR2A,FOS,GDF15,GPT,HIF1A,HLA-A,JUN,PPARG,RUNX1,SERPINE2,SLC16A3,SPP1
estrogen receptor		group		-1.511	-1.517	9.8e-06	ADIPOQ,CCN2,CDH11,COL5A1,COL9A2,EGR1,EREG,FGF1,FOS,HBEGF,ICAM2,JUN,PDGFC,PLAUR,SERPINE1,TIMP4,TNC
3,4,5,3',4'-pentachlorobiphenyl		chemical toxicant		0.563	0.59	9.8e-06	CA3,CES1,CLDN5,GADD45A,JUN,MYH11,PRKAR2B,PTGFR,TNC,UGT1A6
CCN5	-2.027	growth factor		0.218	0.202	1.01e-05	ADIPOQ,CCN2,CEBPA,FABP4,HIF1A,JUN,PPARG,SERPINE1
colchicine		chemical drug		1.255	1.279	1.01e-05	ATF3,CCN2,FOS,HIF1A,JUN,LEP,SOX9,TUBA1B
IGFBP3	0.271	other		1.992	1.984	1.01e-05	ADIPOQ,CDKN1A,COL2A1,RETN,SDC2,SERPINE1,TNC
SETD2	0.151	enzyme		-1.89	-1.922	1.01e-05	CCN1,CCN2,GJA4,JUN,PDGFC,SERPINE1,SOX17
l-asparaginase		biologic drug		1.906	1.845	1.01e-05	ALDH1L2,ASNS,CDKN1A,EXTL1,FASN,FGF21,LIPG,MCM6,PKMYT1,REM1,THRSP,TRIB3
NOS2	-1.824	enzyme		0.042	0.055	1.03e-05	ADIPOQ,APP,CDKN1A,CFD,CYP2E1,FABP4,FASN,GPT,H19,HIF1A,LEP,Orm1 (includes others),PC,SERPINA3,Tgtp1/Tgtp2
glucocorticoid		chemical drug		-0.96	-0.958	1.09e-05	ADRB3,CCN2,CDKN1A,CLDN5,FASN,KLK3,LEP,Mup1 (includes others),NOS1,Orm1 (includes others),PPARG,PRNP,RASD1,SERPINA3,SERPINE1,SLPI,SPP1,TNFRSF11B
5-O-mycolyl-beta-araf-(1->2)-5-O-mycolyl-alpha-araf-(1->1')-glycerol		chemical - endogenous non-mammalian		1.265	1.329	1.11e-05	ATF3,EGR2,FABP4,GPAT3,HBEGF,ITGB8,LRP12,MGLL,SERPINE2,SLC7A11
ATF2	0.093	transcription regulator		1.692	1.759	1.11e-05	ASNS,ATF3,EGR1,FGF21,FOS,GADD45A,ITGB8,JUN,PPARG,TF
GW9662		chemical reagent		1.842	1.813	1.11e-05	ADIPOQ,CCN2,CDKN1A,CEBPA,FABP4,FASN,FOS,GDF15,LOC102724788/PRODH,PPARG
TFAP2A	0.177	transcription regulator		1.039	1.026	1.11e-05	CDKN1A,CEBPA,EREG,F2R,GEM,MMP2,NOS1,PLAAT3,PLAUR,PPARG,SERPINE1
BAG1	-0.413	other		1.982	2.006	1.13e-05	CDKN1A,FOS,GADD45A,JUN,KLK3,NEDD4L
HEY1	-1.019	transcription regulator		0.825	0.782	1.13e-05	CDKN1A,CNN1,MMP2,MYH11,MYOG,PROX1
AP20187		chemical reagent		0	-0.034	1.18e-05	ADIPOQ,EGR1,FOS,RETN
L-cysteine		chemical - endogenous mammalian		-1.131	-1.1	1.18e-05	CDO1,FOS,PCK2,SCD
glimepiride		chemical drug				1.18e-05	ADIPOQ,FABP4,LEP,PPARG
HIF1A	1.151	transcription regulator	Activated	2.943	3.018	1.19e-05	ADIPOQ,ASNS,CCN1,CCN2,CD274,CDKN1A,COX4I2,EREG,ERO1A,FOS,HIF1A,HP,JUN,LEP,MMP2,NOX4,PLAUR,PLOD2,SERPINE1,SLC16A3,SOX9,TAC1,TNFRSF11B,TRIM66	Ap1,CTNNB1,EGR1,ELK1,ERK1/2,FOXO3,HIF1A,IL6,NFkB (complex),PPARG,RAC1,SMAD1,SMAD3,SP1,SREBF1,TNF
IDH1	-0.862	enzyme	Inhibited	-2.646	-2.62	1.2e-05	CFD,EGR1,FABP4,FASN,GPT,LEP,PPARG,RETN
lithium chloride		chemical drug		-0.384	-0.342	1.23e-05	APP,CDKN1A,FOS,GDF15,HAPLN1,KLK3,MMP2,MYH11,MYOG,PPARG,SOX9,VCAN
PTH		other	Activated	2.267	2.321	1.25e-05	Acan,CCN2,CDKN1A,COL2A1,EGR2,ESAM,FOS,GALNT3,JUN,MMP2,PLXDC2,RUNX1,SPP1,TNFRSF11B	Ap1,CTNNB1,EGR1,ELK1,ERK,ERK1/2,FOXO3,HIF1A,IL6,NFkB (complex),PPARG,PRKCD,PTH,SMAD1,SMAD3,SMAD4,SP1,SRC,SREBF1,STAT6
JAK1	0.15	kinase		-0.368	-0.308	1.26e-05	CDKN1A,FOS,HIF1A,HLA-A,LRG1,MMP2,Orm1 (includes others),RUNX1,TF
bromobenzene		chemical toxicant		0.218	0.221	1.26e-05	ABCC1,CDKN1A,CDO1,CYP2E1,FMO1,FOS,GADD45A,Gstt1,JUN
tyrphostin AG 1478		chemical - kinase inhibitor	Inhibited	-2.234	-2.286	1.26e-05	CDKN1A,FBN1,FOS,HAPLN1,HBEGF,HIF1A,MMP2,PTTG1,RUNX1	Ap1,CTNNB1,EGF,EGR1,ELK1,ERK,FOXO3,HIF1A,NFkB (complex),PRKCD,SMAD3,SMAD4,SP1,SRC,SREBF1,STAT6,TGFB2,tyrphostin AG 1478
ESR1	0.049	ligand-dependent nuclear receptor		0.872	0.893	1.26e-05	ARHGAP18,ATF3,CALML4,CCN1,CDC42EP2,CDKN1A,CEBPA,CLEC3A,CNN1,COL5A2,CYP26B1,CYP2E1,DLL1,EGR1,EREG,FASN,FOS,GDF15,GEM,GREM1,H19,HBEGF,HEBP1,HIF1A,JUN,KLK3,LEP,MMD,MYH11,PAK6,PLAUR,PLOD2,PPARG,PTGER3,PTPRT,PTTG1,RERG,ROBO1,ROBO2,SCD,SERPINE1,SLC16A3,SLC1A4,SLC3A2,SLC7A11,SOX9,SPP1,STEAP1,TAC1,THBS3,TMOD1,TNFRSF11B,TRIB3
RAS		group		1.225	1.261	1.35e-05	CCN2,CD274,CDKN1A,CEBPA,EGR1,FOS,JUN,MMP2,MYH11,PLAUR,SERPINE1,SERPINE2
15(S)-HETE		chemical - endogenous mammalian		1.959	1.959	1.45e-05	EGR1,FABP4,JUN,MMP2,PPARG
docosahexaenoic acid		chemical drug		-1.248	-1.276	1.46e-05	ACSS2,ADIPOQ,APP,CCN2,CDKN1A,FASN,FOS,LEP,MMP2,MSTN,NOX4,PNPLA2,SCD,SERPINE1
CCDC3	-0.205	other				1.47e-05	DGAT2,FASN,LEP
MK-1642		chemical reagent				1.47e-05	LGALS12,LIPE,PLIN1
saccharin		chemical reagent				1.47e-05	CEBPA,FABP4,PPARG
FGFR2	-0.041	kinase		0.817	0.847	1.49e-05	CDH11,CDKN1A,DLL1,HHIP,KLB,LGR5,NNAT,NOG,PLAUR,SOX17,SPP1,TSPAN8
choline fenofibrate		chemical drug		-1.831	-1.823	1.49e-05	ADIPOQ,Apoc3,GPT,HIF1A,PON1,SERPINE1
sirolimus		chemical drug		-0.326	-0.388	1.5e-05	APP,ASNS,CCN2,CDKN1A,CEBPA,CFD,CYP2E1,DPP7,EGR1,FASN,FOS,HIF1A,JUN,LEP,MMP2,MYH11,MYOG,PLAUR,PLIN1,PPARG,PRNP,SCD,SERPINE1,SLC3A2,SOX9,TNFRSF11B
fatty acid		chemical - endogenous mammalian		-0.166	-0.113	1.54e-05	CCN1,CYP2E1,FABP4,FASN,MAFA,PLIN4,PPARG,SCD,SERPINE1,SLC27A1,THRSP
BMPR1A	0.456	kinase	Activated	2.387	2.422	1.55e-05	Acan,CDKN1A,COL2A1,HAPLN1,NOG,SERPINE1,SOX9	Ap1,BMPR1A,CTNNB1,EGR1,ELK1,ERK1/2,HIF1A,NFkB (complex),PPARG,SMAD1,SMAD3,SMAD4,SP1
FGFR3	1.053	kinase				1.55e-05	CDKN1A,DLL1,FOS,NOG,PROX1,SOX9,SPP1
SCAP	0.027	other	Inhibited	-2.168	-2.117	1.6e-05	AACS,ACSS2,ASNS,ATF3,FABP5,FASN,PON1,SCD,THRSP,TRIB3	PPARG,SCAP,SREBF1,SREBF2
SMO	0.138	g-protein coupled receptor		0.152	0.182	1.6e-05	DIO1,HHIP,KLK3,LGR5,LUM,NOG,RUNX1,SOX18,SOX9,VCAN
quercetin		chemical drug		1.385	1.392	1.63e-05	CYP2E1,EGR1,FASN,FOS,GPT,HIF1A,JUN,KLK3,LEP,PLAUR,PON1,SOX9
PDGFB	-1.352	growth factor	Activated	2.274	2.308	1.67e-05	CNN1,EGR1,FGF1,FOS,KCNA5,MMP2,SPP1,TNC	Ap1,EGR1,ELK1,MAPK3,NFkB (complex),PDGFB,SMAD3,SMAD4,SP1
RAC1	0.077	enzyme	Activated	2.961	3.006	1.7e-05	Acan,ATF3,CCN2,COL2A1,FOS,HIF1A,JUN,MMP2,MYOG,PLAUR,SOX9	Ap1,CDC42,CTNNB1,EGR1,ELK1,ERK1/2,FOXO3,HIF1A,HRAS,MAP2K1/2,MAP3K1,NFkB (complex),PPARG,RAC1,SMAD1,SMAD3,SMAD4,SP1,SRC,ZFP36
reactive oxygen species		chemical toxicant		1.965	2.025	1.7e-05	ABCC1,ADIPOQ,CCN2,CDKN1A,GADD45A,HBEGF,HIF1A,JUN,LEP,MAFA,SERPINE1
Alpha catenin		group	Inhibited	-2.205	-2.281	1.79e-05	CDH11,COL15A1,COL5A1,COL5A2,EREG,ICAM2,KLK3,LUM,MMP2,STEAP4,TNC,TSPAN8
MYOC	-0.353	other		1	1.026	1.8e-05	CARD10,CDH11,DPP7,EGR2,FBN1,HHIP,NFASC,SLC7A11,SPP1,TRIM63
IKBKB	-0.136	kinase		1.559	1.617	1.83e-05	ATF3,CCN2,CDKN1A,EGR1,EREG,FASN,FOS,GADD45A,Gstt1,HIF1A,HLA-A,LIPE,MMP2,PLIN1,SERPINE2,TNC,TNFRSF11B,TRIM63,VCAN
calcitriol		chemical drug		1.586	1.574	1.86e-05	ADHFE1,APP,CCN1,CDKN1A,CEBPA,CES1,CFD,CYB5R1,EGR1,ERRFI1,FABP4,FASN,FBN1,FOS,GADD45A,GEM,HBEGF,JUN,LEP,MYH8,MYOG,NOX4,OSTN,PC,PPARG,PTGFR,SPP1,TF,TNFRSF11B
IFNB1		cytokine	Inhibited	-2.768	-2.732	1.87e-05	Apol11b (includes others),CD274,CDKN1A,CYP2E1,DLL1,F2R,FBN1,FOS,GBP6,Gvin1 (includes others),HLA-A,Ifi27l2a/Ifi27l2b,Ifitm1,MCM6,MMP2,SPP1,Tgtp1/Tgtp2,Trim30a/Trim30d	Ap1,ELK1,HIF1A,IFNB1,IL1A,NFkB (complex)
4-methylnitrosoamino-1-(3-pyridinyl)-1-butanone		chemical toxicant		1.437	1.465	1.89e-05	CDKN1A,FASN,FOS,HP,JUN,SPP1,TF
ATP7B		transporter		-1.633	-1.628	1.89e-05	AACS,APP,FABP5,FASN,H19,PTTG1,THRSP
AGN194204		chemical drug		0.071	0.13	1.97e-05	ADIPOQ,ATF3,CA3,CDKN1A,CEBPA,CYP26B1,FABP4,FGF21,GADD45A,PLIN4,PPARG,PRNP,SCD,SLC3A2,SPP1,STAC2,Tgtp1/Tgtp2
FOXO3	0.572	transcription regulator	Activated	2.71	2.732	2e-05	Acan,CCN1,CCN2,CDKN1A,CERS4,EGR1,EGR2,FABP4,FABP5,FASN,FOS,GADD45A,HIF1A,IARS1,MSTN,PRNP,PTTG1,SERPINE1,SLC1A4,SOX9,TRIM63	Ap1,CTNNB1,EGR1,ELK1,ERK1/2,FOXO3,HIF1A,IL6,MAP2K1/2,NFkB (complex),PPARG,SMAD1,SMAD3,SP1,SREBF1,TNF
N-acetyl-L-cysteine		chemical drug	Inhibited	-2.093	-2.152	2.01e-05	CCN1,CCN2,CDKN1A,EGR1,FASN,FOS,HBEGF,HIF1A,JUN,MMP2,MYH11,PLAUR,SERPINE1,SPP1,TNC,TRIM63	ATF4,Ap1,CTNNB1,EDN1,EGR1,ELK1,ERK,ERK1/2,FOXO3,HIF1A,HRAS,N-acetyl-L-cysteine,NFkB (complex),PPARG,PRKCB,SMAD1,SMAD3,SMAD4,SP1,SRC,STAT6,TGFB1,ZFP36,hydrogen peroxide,nitric oxide
HDAC3	-0.154	transcription regulator		-0.359	-0.37	2.02e-05	Acan,CDKN1A,DIO1,FASN,FOS,HP,KLK3,SCD,SERPINE1,SPP1
RNA polymerase II		complex				2.1e-05	ADIPOQ,AGPAT2,ASNS,CDH11,CDKN1A,CEBPA,DIO1,FABP4,FOS,GADD45A,GDF15,GPT,JUN,MMP2,MYOG,PKMYT1,PPARG,SPP1
NMDA Receptor		complex	Activated	2.219	2.265	2.13e-05	ATF3,FOS,HOMER1,NOS1,TAC1
Srebp		group		0.2	0.253	2.13e-05	ACSS2,CDKN1A,FASN,FOS,H19
epinephrine		chemical - endogenous mammalian		-0.563	-0.536	2.17e-05	AQP7,CDKN1A,LEP,LIPE,MMP2,OSTN,PLIN1,RETN,TRIM63
NCOA1	-0.062	transcription regulator		-1.092	-1.106	2.22e-05	ADIPOQ,CDKN1A,CEBPA,DIO1,EGR1,FABP4,FOS,HIF1A,KLK3,LEP,PPARG,SERPINE1,THRSP
EFNA2	0.729	kinase		-0.816	-0.808	2.3e-05	CCN2,FABP5,KLK3,NEDD4L,NOS1,RUNX1,SOX9,TRIM5
ADM	0.055	other		0.568	0.55	2.3e-05	FOS,HIF1A,NOS1,PPARG,SPP1,TAC1,TNFRSF11B
advanced glycation end-products		chemical - endogenous mammalian	Activated	2.2	2.222	2.3e-05	CCN2,CDKN1A,CLDN5,F2R,ROBO1,SERPINE1,SPP1	Ap1,CTNNB1,EGR1,ELK1,ERK1/2,HIF1A,NFkB (complex),SMAD1,SMAD3,SMAD4,SP1,advanced glycation end-products
N-cor		group		1.593	1.542	2.31e-05	ADIPOQ,CDKN1A,CIDEC,FABP4,FASN,HBEGF,HEBP1,MMP2,PLIN1,SCD,XYLT1
MEDAG	-0.015	other	Inhibited	-2	-1.952	2.32e-05	FASN,LIPE,PLIN1,PPARG
ITGB1	0.686	transmembrane receptor		0.568	0.579	2.35e-05	ABCC1,CDKN1A,COL5A2,FGF1,FOS,JUN,LRP6,MMP2,PLAUR,ROBO1,SERPINE1,SPON1
indole-3-carbinol		chemical drug		1.732	1.72	2.52e-05	CDKN1A,FMO1,FOS,GDF15,HP,SPP1
tretinoin		chemical - endogenous mammalian		0.162	0.221	2.59e-05	ACSS2,APCDD1,APP,ASNS,CCN1,CCN2,CD274,CDKN1A,CEBPA,CES1,COL2A1,COL9A2,CYP26B1,CYP4B1,DBI,DHRS9,DLL1,EGR1,ERRFI1,FABP4,FABP5,FASN,FFAR2,FOS,GDF15,GFRA1,GREM1,HBEGF,HLA-A,HOXA5,HSD11B1,JUN,KLB,KLK3,LIPE,LRP6,MFNG,MYOG,PLAUR,PPARG,PRNP,RARRES2,Rpl29 (includes others),SCD,SERPINE1,SERPINE2,SLC7A11,SLPI,SMAD9,SOX17,SOX9,SPP1,TAC1,TF,TNC,TNFRSF11B
IL6R	-0.549	transmembrane receptor		0.856	0.898	2.81e-05	ABCC1,CDKN1A,COL2A1,GREM1,HP,MMP2,SERPINA3,TAC1,TNFRSF11B
prostaglandin E2		chemical - endogenous mammalian		1.549	1.587	2.96e-05	Acan,APP,ATF3,CCN2,CD274,CDKN1A,EGR1,EGR2,EREG,F2R,FASN,FOS,HIF1A,JUN,MMP2,PPARG,SPP1,THRSP,TNFRSF11B
TP73		transcription regulator		0.874	0.906	2.97e-05	ABCC1,ATF3,CCN1,CDC42EP2,CDKN1A,CNTFR,COL5A2,EGR1,EREG,FASN,GADD45A,HBEGF,HIF1A,LRG1,MCM6,MMP2,RUNX1,SCRG1,SERPINA3,SERPINE1,SERPINE2,SPP1,TIMP4
AKR1B1	-0.073	enzyme		1.993	1.999	3.04e-05	Apoc3,CDKN1A,FABP4,MMP2,PPARG
SCX	-0.437	transcription regulator		-1.004	-1.035	3.04e-05	Acan,HAPLN1,SOX9,SPP1,TNC
Pka		complex		0.794	0.841	3.05e-05	CCN2,CDKN1A,EGR1,FGF21,FOS,HOMER1,JUN,LEP,LIPE,RUNX1,SOX9,TNFRSF11B
SRF	0.161	transcription regulator		-0.03	-0.002	3.06e-05	ASB5,CCN2,CDKN1A,CENPB,CLDN5,CNN1,EGR1,EGR2,FGF1,FOS,GADD45A,JUN,MSTN,MYH11,MYOG,P2RX1,SLPI,TNC,TST,VCAN
SMARCB1	0.06	transcription regulator		-0.524	-0.476	3.09e-05	CDKN1A,COL5A2,CYP2E1,FABP4,FCGR2A,FOS,GADD45A,HBEGF,HP,Mup1 (includes others),NEO1,PC,PPARG,TMOD1
25-hydroxycholesterol		chemical reagent	Activated	2.758	2.771	3.11e-05	ASNS,ATF3,CHAC1,FASN,FOS,JUN,SCD,TRIB3	25-hydroxycholesterol,SCAP,SREBF1,SREBF2
SOCS3	0.828	phosphatase		-1.484	-1.522	3.18e-05	ATF3,CDKN1A,EGR1,FASN,FOS,IGFALS,JUN,LEP,SCD
F7		peptidase	Activated	2.586	2.622	3.34e-05	CCN1,CCN2,EGR1,FOS,GADD45A,HBEGF,PLAUR	Ap1,CTNNB1,EGR1,ELK1,ERK,ERK1/2,F2R,F7,FOXO3,HIF1A,NFkB (complex),SMAD1,SMAD3,SP1,STAT6
beta-carotene		chemical - endogenous mammalian	Activated	2.588	2.539	3.34e-05	ACSS2,Aldh1a7,DBI,DGAT2,FABP4,Orm1 (includes others),PPARG
CCN2	2.337	growth factor		1.554	1.596	3.5e-05	Acan,CCN2,COL2A1,EGR1,HAPLN1,HIF1A,JUN,MMP2,PTGFR,SERPINE1
arachidonic acid		chemical - endogenous mammalian		1.893	1.901	3.5e-05	EGR1,FABP4,FASN,FOS,JUN,PNPLA2,PPARG,SCD,SPP1,THRSP
HTT	0.008	transcription regulator		1.107	1.127	3.6e-05	ADCY5,APP,ATF3,CALML4,CCN2,CDH11,CDKN1A,CEBPA,COX4I2,DLL1,EGR1,EGR2,FASN,FGF1,FOS,HBEGF,HIF1A,HOMER1,JUN,KCNC4,KCNK3,LTBP2,MMP2,Mup1 (includes others),NOS1,PC,PLAUR,PPARG,RGS9,SERPINA3,SPP1,TAC1,THRSP
vitamin E		chemical drug	Inhibited	-2.599	-2.639	3.6e-05	CDKN1A,COL2A1,EGR1,GPT,MMP2,NOS1,SERPINE1,SPP1	Ap1,CTNNB1,EGR1,ELK1,F2,FOXO3,HIF1A,IL6,MAPK3,NFkB (complex),PRKCB,SMAD3,SMAD4,SP1,SREBF1,Tgf beta,vitamin E
Creb		group		-1.001	-0.955	3.83e-05	ADIPOQ,ATF3,CCN1,CDKN1A,CEBPA,CIDEC,EGR1,FOS,GJA5,JUN,LEP,MMP2,PPARG,SLC7A11,SOX17,SOX9,TAC1,TF,TNFRSF11B
TAF4	-0.106	transcription regulator	Inhibited	-2.615	-2.652	3.89e-05	CCN2,CDH11,GREM1,HBEGF,LRRC15,LUM,MMP2,PDGFC,RUNX1,SPP1
3-methylcholanthrene		chemical toxicant		-1.428	-1.38	3.98e-05	CCN1,FOS,HP,Orm1 (includes others),PON1,SLC7A11,UGT1A6
TNC	2.355	other		1.254	1.284	3.98e-05	CDH11,CDKN1A,COL2A1,EREG,FOS,LGR5,MMP2
conjugated linoleic acid		chemical drug		0.447	0.449	3.98e-05	CEBPA,FOS,GDF15,LEP,PPARG,Slc25a1,TNFRSF11B
IGF2BP1		translation regulator		0	0.014	4.03e-05	CDKN1A,COL5A1,GADD45A,LUM,SOX9,TNC
methylnitronitrosoguanidine		chemical toxicant		1.78	1.837	4.03e-05	CDKN1A,CEBPA,EGR1,GADD45A,GDF15,SERPINE1
1,1-bis(3'-indolyl)-1-(4-trifluoromethyl-phenyl)methane		chemical reagent		1.938	1.964	4.09e-05	ATF3,CDKN1A,GDF15,KLK3
Pdgfr		group		1.982	2.03	4.09e-05	EGR1,EREG,HBEGF,TNC
acetic acid		chemical - endogenous mammalian		1.335	1.382	4.09e-05	EGR1,FOS,JUN,LEP
clioquinol		chemical drug	Activated	2	2.027	4.09e-05	APP,CDKN1A,FOS,JUN	CTNNB1,HIF1A,NFkB (complex),SMAD3,SP1,clioquinol
indinavir		chemical drug	Activated	2	1.995	4.09e-05	ADIPOQ,FABP4,LIPE,TRIM63
G6PD	-1.007	enzyme		-1.109	-1.069	4.22e-05	ADIPOQ,FABP4,FASN,PPARG,RETN
MLX	-0.199	transcription regulator		-1.387	-1.333	4.22e-05	DIO1,FASN,FGF21,SCD,THRSP
selumetinib		chemical drug		0.277	0.274	4.22e-05	ABCC1,CD274,CDKN1A,HIF1A,JUN
LGALS3	0.755	other		-1.425	-1.406	4.31e-05	ABCC1,ADIPOQ,CDKN1A,COL5A2,FGF21,GFRA1,GPT,LGALS12,PNPLA2,PPARG
indomethacin		chemical drug		-0.868	-0.844	4.51e-05	APP,ASNS,CDKN1A,FABP4,FASN,FCGR2A,FOS,GDF15,HIF1A,MMP2,NOS1,PLAUR,PPARG,SPP1,TSPAN8,VCAN
PP2/AG1879 tyrosine kinase inhibitor		chemical - kinase inhibitor		-1.728	-1.769	4.56e-05	CCN2,CDKN1A,FOS,HIF1A,KLK3,MYOG,PTTG1,SERPINE1,SPP1
ERN1	1.057	kinase		1.234	1.278	4.63e-05	ATF3,CYP2E1,DGAT2,ERO1A,FASN,GPT,JUN,LGR5,NOX4,PPARG,SCD,TINAGL1
NOTCH1	-1.139	transcription regulator		0	0.011	4.71e-05	CCN1,CCN2,CDKN1A,CEBPA,CFD,CHST1,CNN1,DLL1,FCGR2A,FOS,HIF1A,MMP2,MYH11,PPARG,PROX1,SERPINE1,SPP1
ROCK2	0.163	kinase		0.415	0.459	4.73e-05	APP,CEBPA,CNN1,FABP5,PPARG,SERPINE1,SPP1
Ro31-8220		chemical - kinase inhibitor		-1.069	-1.119	4.73e-05	CDKN1A,EGR1,FABP4,HIF1A,KLK3,MMP2,SERPINE1
cadmium chloride		chemical toxicant				4.77e-05	FOS,GADD45A,HIF1A,HP,JUN,KLK3,Mup1 (includes others),Orm1 (includes others)
ATF3	2.033	transcription regulator		1.145	1.128	4.77e-05	ADIPOQ,ASNS,ATF3,CDKN1A,CHAC1,GBP6,JUN,KLK3,MMP2,SERPINE1
bezafibrate		chemical drug		-0.754	-0.71	4.77e-05	ADIPOQ,DBI,FABP4,FASN,FGF21,LEP,MGLL,PPARG,SCD,SERPINE1
DUSP1	1.491	phosphatase	Inhibited	-2.164	-2.168	4.9e-05	AACS,ACVR1C,CIDEC,GDF15,JUN,LUM,MGLL,MYOG,PLAUR,SERPINE1,Wfdc21
SOST		other		-1.823	-1.8	5.03e-05	CEBPA,FABP4,FASN,NOX4,PLIN1,PPARG
formaldehyde		chemical - endogenous mammalian	Activated	2.351	2.397	5.03e-05	EGR1,EGR2,FOS,Gstt1,JUN,PON1	Ap1,CTNNB1,ELK1,ERK,FOXO3,MAPK3,NFkB (complex),SMAD3,SP1,STAT6,formaldehyde
green tea polyphenol		chemical drug		-0.751	-0.768	5.03e-05	ADIPOQ,CDKN1A,FOS,JUN,MMP2,PPARG
sodium orthovanadate		chemical reagent	Activated	2.38	2.397	5.03e-05	CDKN1A,CEBPA,FABP4,HIF1A,PLAUR,SERPINE1	Ap1,CTNNB1,EGR1,ELK1,ERK1/2,HIF1A,NFkB (complex),SMAD1,SMAD3,SP1,SRC,sodium orthovanadate
TGFA	0.892	growth factor	Activated	2.05	2.095	5.12e-05	CCN2,CDKN1A,EREG,ERRFI1,FOS,PRNP,PTTG1,SERPINE1,SLPI	Ap1,FOXO3,IL6,NFkB (complex),SMAD3,SP1,SREBF1,TGFA
NR1H4		ligand-dependent nuclear receptor		-0.587	-0.589	5.17e-05	CEBPA,FABP5,FASN,GPT,LIPE,MAFA,MMP2,Orm1 (includes others),PON1,PPARG,RARRES2,SPP1,Sult1a1
glutathione		chemical - endogenous mammalian		-0.893	-0.894	5.46e-05	ABCC1,ATF3,CDKN1A,HIF1A,MYOG,SERPINE1,SLC7A11,TNC
ADRA1B	-0.376	g-protein coupled receptor				5.58e-05	CDKN1A,EGR1,EGR2,FABP5,FOS,JUN,LEP
SPHK1	0.004	kinase		1.728	1.746	5.58e-05	APP,CCN2,CDKN1A,EGR1,HIF1A,JUN,SERPINE1
valsartan		chemical drug	Inhibited	-2.377	-2.417	5.58e-05	ADIPOQ,APP,FOS,LEP,MMP2,SERPINE1,SPP1	AGT,Ap1,CTNNB1,EGR1,ELK1,FOXO3,HIF1A,NFkB (complex),SMAD3,SP1,valsartan
curcumin		chemical drug	Inhibited	-3.213	-3.247	5.69e-05	ABCC1,ADIPOQ,APP,CCN2,CDKN1A,CEBPA,CYP2E1,EGR1,FOS,HIF1A,JUN,LEP,MMP2,NEO1,PPARG,RETN,SERPINE1,SOX9,XYLT1	ATF4,Ap1,CTNNB1,EGR1,ELK1,ERK,ERK1/2,FOXO3,HIF1A,IL1A,IL6,Jnk,NFkB (complex),SMAD1,SMAD3,SMAD4,SP1,SREBF1,STAT6,curcumin,hydrogen peroxide,nitric oxide
EML4-ALK		fusion gene/product		0.231	0.218	5.73e-05	CD274,COL5A2,HIF1A,SERPINE1,VCAN
mir-33		microrna	Activated	2.219	2.165	5.73e-05	ADIPOQ,CEBPA,CFD,FABP4,PPARG
CD36	-2.531	transmembrane receptor		0.478	0.527	5.74e-05	ADIPOQ,FASN,LEP,PLAUR,PNPLA2,PPARG,SCD,SERPINE1,TNFRSF11B
CNTF		cytokine		1.051	1.064	5.74e-05	CNTFR,EGR1,FASN,FOS,LEP,MYOG,SCD,SERPINA3,TAC1
ANKH	1.052	transporter				5.77e-05	COL2A1,SOX9,SPP1
BRD8	-0.16	transcription regulator				5.77e-05	AGPAT2,FABP4,PPARG
Cxcl3		cytokine				5.77e-05	CEBPA,FABP4,PPARG
HINT2	-0.996	other				5.77e-05	ADIPOQ,GPT,LEP
MLK4B		other				5.77e-05	ATF3,CDKN1A,JUN
PDE10A	1.014	enzyme				5.77e-05	GPT,LEP,TAC1
RAB23	0.44	enzyme				5.77e-05	Acan,COL2A1,SOX9
sucralose		chemical reagent				5.77e-05	CEBPA,FABP4,PPARG
Vegf		group		0.675	0.761	5.91e-05	ARHGAP18,ASNS,ATF3,CCN1,CNN1,CNTFR,EGR1,FABP4,GEM,GPR4,HBEGF,HIF1A,HOMER1,ITGB8,JUN,MMP2,PC,PKMYT1,PLAUR,PLOD2,PLVAP,RGS9,SCML4,TNC,TNFRSF11B
MTOR	-0.224	kinase		-0.537	-0.511	5.97e-05	CD274,CDKN1A,CEBPA,FABP4,FABP5,FASN,HIF1A,HSD11B1,KLK3,LEP,MYH8,MYOG,NOX4,PPARG,PRKAR2B,SGCB,SLC16A3,SNCG,TNFRSF11B,TRIM63
EP300	0.161	transcription regulator		1.118	1.188	6.05e-05	ADIPOQ,CDKN1A,CEBPA,COL2A1,DIO1,EGR1,EGR2,FABP4,FASN,FOS,GFRA1,HSD11B1,IL17RE,JUN,KLK3,LEP,MMD,MYH11,MYOG,RETN,SLC27A1,SLC7A11,TNC
TREM1		transmembrane receptor	Activated	2.704	2.754	6.13e-05	ASNS,ATF3,CD274,DUSP14,EGR1,EGR2,FFAR2,GEM,GREM1,HBEGF,HOMER1,NEDD4L,PPARG,SPP1	Ap1,ELK1,FOXO3,IL6,MAPK3,NFkB (complex),SMAD3,SP1,SREBF1,TREM1
hydrocortisone		chemical - endogenous mammalian		-1.897	-1.883	6.36e-05	ALDH1L1,APP,CCN2,CDH11,CEBPA,CFD,HSD11B1,KLK3,PPARG,PROX1,SERPINE1,TNFRSF11B
ADCYAP1		other		0.372	0.395	6.39e-05	AGTR2,BCAM,CCBE1,COL5A1,COL5A2,EDIL3,EGR1,EGR2,EMB,FOS,HAPLN1,LUM,NOS1,SERPINA3,SERPINE2,UGT1A6
LDLR	-0.366	transporter				6.39e-05	CD274,CDKN1A,CEBPA,DHRS9,EGR1,FABP5,FASN,GJA4,GJA5,GPT,MMP2,PPARG,SCD,SPP1,VCAN
CHRM3		g-protein coupled receptor		1	1.048	6.69e-05	CCN1,EGR1,FOS,LEP
GNA13	0.388	enzyme				6.69e-05	CNN1,EGR1,FOS,MYH11
PRPF19	0.287	enzyme		-1.131	-1.103	6.69e-05	CDKN1A,PLIN1,PLIN4,SCD
ST3-Hel2A-2		chemical reagent		2	2.048	6.69e-05	ATF3,EGR2,FOS,GADD45A
meloxicam		chemical drug		0.958	0.949	6.69e-05	CDKN1A,HIF1A,Pde4d,TAC1
FOXA2		transcription regulator		-1.633	-1.612	6.76e-05	CA3,CEBPA,CNN1,FABP5,H19,HHIP,LIPE,MAFA,MYH11,PON1,PPARG,PRNP,SCD,SOX17,TF,THBS3
BMP7		growth factor		0.297	0.334	6.88e-05	ADIPOQ,CDKN1A,CEBPA,COL5A2,EREG,FASN,GREM1,MMP2,NOG,PPARG,SERPINE1,SPP1,VCAN
silibinin		chemical drug		-1.157	-1.204	7.1e-05	CCN2,CDKN1A,EGR1,HIF1A,KLK3,MMP2,PLAUR,RETN
LEPR	-1.309	transmembrane receptor		1.125	1.135	7.37e-05	ADIPOQ,ADRB3,CYP2E1,FASN,FOS,HIF1A,LEP,MMP2,Mup1 (includes others),PC,PPARG,RETN,SERPINE1
S100A9	0.425	other		0.898	0.924	7.37e-05	ATF3,BCHE,CD274,FCGR2A,H19,LOC102724788/PRODH,MMP2,MYH8,PDGFC,ROBO2,STAC2,UGT1A6,VCAN
MAPK14	-0.09	kinase		1.058	1.106	7.45e-05	DLL1,EREG,FASN,FOS,GADD45A,GREM1,ITGB8,JUN,LRP6,MYH11,MYOG,PLAUR,SPP1,TNN
ABCB4	1.797	transporter		-1.345	-1.395	7.6e-05	CCN2,GPT,H19,MMP2,SERPINE1,SPP1
HOXC8	-1.195	transcription regulator		0.64	0.642	7.6e-05	APP,CDH11,CNN1,EMB,SLC16A3,SPP1
IFRD1	0.365	other		-0.808	-0.836	7.6e-05	CCN2,DGAT2,MYH8,MYOG,PTTG1,SPP1
RARRES2	-1.823	transmembrane receptor	Inhibited	-2.236	-2.23	7.62e-05	ADIPOQ,FASN,LEP,LIPE,PLIN1
H2AB3 (includes others)		other		1.89	1.954	7.67e-05	ATF3,CDKN1A,CHAC1,DHRS9,FOS,MELTF,PAQR9
bicuculline		chemical - endogenous non-mammalian	Activated	2.583	2.627	7.67e-05	APP,ATF3,CCN1,EGR1,EGR2,FOS,JUN	ELK1,bicuculline
SMAD7	0.031	transcription regulator		-1.95	-1.973	8e-05	Acan,CCN2,CDKN1A,COL2A1,GADD45A,HBEGF,LTBP2,MMP2,SCD,SERPINE1,SOX17,SOX9
PARP1	-0.033	enzyme		-1.931	-1.897	8.21e-05	CD274,CDKN1A,FASN,FOS,GBP6,GDF15,H19,JUN,KLK3,MMP2,Tgtp1/Tgtp2
MAPK8	0.212	kinase		1.533	1.564	8.46e-05	CCN2,CDKN1A,EGR1,FOS,GADD45A,JUN,KLB,LEP,MMP2,MYOG,NOX4,PLAUR,TAC1
RARB	-0.429	ligand-dependent nuclear receptor		0.543	0.571	8.46e-05	CDKN1A,CYP26B1,EGR1,FGF21,GADD45A,GBP6,HOXA5,HP,JUN,KLK3,PTGER3,SPP1,TAC1
RGS2	0.612	enzyme		0	-0.041	8.53e-05	ERRFI1,FABP4,HBEGF,HSD11B1,PLVAP,PPARG,RARRES2,SLC16A3,SLC35F2,SPP1
STAT5B	-0.066	transcription regulator		-1.575	-1.565	8.72e-05	AGPAT2,C14orf39,CDKN1A,CDO1,CYP26B1,DGAT2,FOS,GADD45A,IGFALS,LEP,MOXD1,Mup1 (includes others),NOX4,RASD1,SCD,TF,THRSP,TMEM45B
TGFBR1	0.854	kinase		1.949	1.989	8.88e-05	Acan,CCN2,CDKN1A,CLDN5,EGR2,FGF21,GJA4,RUNX1,SERPINE1
Tnf (family)		group	Activated	2.8	2.835	8.92e-05	ADIPOQ,ATF3,GJA5,HIF1A,HSD11B1,JUN,MSTN,NOX4,PTGER3,SERPINE1,TRIM63	Ap1,CTNNB1,EGR1,ELK1,ERK1/2,HIF1A,NFkB (complex),SMAD1,SMAD3,SP1,Tnf (family)
NR4A1	1.542	ligand-dependent nuclear receptor		1.324	1.302	9.15e-05	ADIPOQ,ATF3,CEBPA,CLDN5,COX4I2,FABP4,FASN,GREM1,HCAR1,HIF1A,LEP,MAFA,PC,PCK2,PPARG,SCD,SERPINE1,SPINT2
EIF2AK4	-0.135	kinase		1.109	1.144	9.23e-05	ASNS,ATF3,CHAC1,EGR1,PCK2,PPARG
hydrogen peroxide		chemical - endogenous mammalian	Activated	3.024	3.086	9.35e-05	ADIPOQ,Ank2,APP,ATF3,CCN2,CDKN1A,CFD,EGR1,FASN,FOS,GADD45A,GDF15,HBEGF,HIF1A,JUN,MMP2,NOS1,PLAUR,PPARG,SERPINE1,SLC7A11,SPP1,TRIB3	AGT,Ap1,CTNNB1,EDN1,EGR1,ELK1,ERK1/2,FOXO3,HIF1A,Jnk,NFkB (complex),PPARG,PRKCB,RUNX3,SMAD1,SMAD3,SMAD4,SP1,doxorubicin,hydrogen peroxide,nitric oxide
pirinixic acid		chemical toxicant		-0.624	-0.55	9.35e-05	ABCC1,ACSS2,Apoc3,ASNS,CDKN1A,CIDEC,DBI,FABP4,FABP5,FASN,FGF21,GADD45A,HIF1A,LEP,MGLL,Mup1 (includes others),Orm1 (includes others),PCK2,PLIN4,PPARG,SCD,SERPINE1,SLC27A1
VEGFA	-0.73	growth factor		0.755	0.83	9.6e-05	ABCC1,ADRB3,CCN1,CCN2,CDKN1A,DLL1,EGR1,FABP4,FOS,HBEGF,HIF1A,LIPE,MMP2,PNPLA2,RUNX1,SERPINE1,SNCG,TNC
FGF1	-1.117	growth factor		0.535	0.521	9.68e-05	CAVIN4,CCN1,CCN2,CDH11,CDKN1A,DLL1,EGR1,FOS,JUN,NDNF,SPP1
sphingosine-1-phosphate		chemical - endogenous mammalian		1.516	1.555	9.86e-05	CCN2,EGR1,FOS,HIF1A,HSD11B1,JUN,LEP,SERPINE1,TNFRSF11B
FGF4		growth factor		-0.415	-0.391	9.96e-05	CDKN1A,FOS,PTTG1,SCD,SOX17
NOS1	1.852	enzyme		1.206	1.248	9.96e-05	ADIPOQ,EGR1,FOS,HIF1A,TRIM63
Pkg		group		0.447	0.467	9.96e-05	EGR1,FOS,JUN,LGR5,SOX9
carbohydrate		chemical - endogenous mammalian				9.96e-05	FASN,FGF21,LEP,SCD,THRSP
SNAI1	0.274	transcription regulator		0.308	0.3	9.99e-05	Acan,ADIPOQ,CCN1,CCN2,CDKN1A,COL2A1,FASN,FOS,GDF15,SERPINE1,TF,TMOD1
Jnk		group	Activated	3.125	3.18	0.000102	APP,CCN2,EGR1,FABP4,FOS,GADD45A,GDF15,JUN,MMP2,NOX4,PLAUR,SERPINE1,TNN,VCAN	Ap1,CTNNB1,EGR1,ELK1,ERK1/2,FAS,FOXO3,HIF1A,IL6,Jnk,NFkB (complex),PPARG,SMAD1,SMAD3,SMAD4,SP1,SREBF1,TNF
SLC7A5	2.425	transporter		-0.762	-0.758	0.000103	CHAC1,PCK2,SLC3A2,TRIB3
ginsenoside Rb1		chemical - endogenous non-mammalian		0.283	0.287	0.000103	FASN,FOS,HBEGF,SCD
pCPT-cAMP		chemical - kinase inhibitor		1.982	2.022	0.000103	APP,EGR1,FOS,JUN
2,3,4,7,8-pentachlorodibenzofuran		chemical toxicant		0.239	0.246	0.000104	CA3,CES1,GADD45A,MYH11,PRKAR2B,PTGFR,UGT1A6
SFRP1	0.582	transmembrane receptor		1.195	1.174	0.000104	APP,FASN,MMP2,SCD,SDC2,SERPINE1,SOX9
capsaicin		chemical drug		1.823	1.823	0.000104	FOS,GDF15,LEP,MMP2,PPARG,TAC1,TNFRSF11B
E. coli B5 lipopolysaccharide		chemical - endogenous non-mammalian	Activated	2.022	2.067	0.000104	Apoc1,CD274,CDKN1A,CEBPA,CES1,DBI,ERRFI1,FASN,FMO1,FOS,HLA-A,HSD11B1,Mup1 (includes others),NEDD4L,SERPINE1,SPINT2,SPP1	Ap1,CTNNB1,E. coli B5 lipopolysaccharide,EGR1,ELK1,ERK1/2,FOXO3,HIF1A,IL6,NFkB (complex),SMAD1,SMAD3,SP1,SREBF1
kainic acid		chemical toxicant	Activated	2.897	2.954	0.000107	APP,ATF3,EGR1,EGR2,ERRFI1,FOS,GFRA1,HBEGF,HOMER1,JUN,PTGER3,SPP1	Ap1,BDNF,CTNNB1,EGR1,ELK1,HIF1A,MAPK3,NFkB (complex),NGF,SMAD3,SP1,kainic acid
PAX3		transcription regulator				0.000108	APP,ASNS,CDKN1A,CLDN5,EGR2,GPT,ICAM2,LIPE,MYOG,P2RX1,PTGER3,RARRES2,TNC,VCAN
ESR2		ligand-dependent nuclear receptor		0.185	0.204	0.00011	ATF3,CCN2,CDKN1A,CES1,CNN1,CYP26B1,EGR1,EMB,EREG,FASN,FOS,HEBP1,IP6K3,KLK3,LEP,MMP2,PAK6,PLAUR,PTGFR,RETN,SERPINE1,SPP1,TAC1,THRSP,TNFRSF11B
DACH1	-1.72	transcription regulator	Inhibited	-2.207	-2.231	0.000111	CDKN1A,EGR1,FOS,JUN,KLK3,SERPINE1	Ap1,DACH1,FOXO3,IL6,NFkB (complex),SMAD3,SP1,SREBF1
miR-338-3p (miRNAs w/seed CCAGCAU)		mature microrna		-1.671	-1.73	0.000111	COL5A1,COL5A2,COX4I2,CRTAP,PLOD2,VCAN
SRC	-0.006	kinase	Activated	2.109	2.146	0.000112	CDKN1A,F2R,FOS,HIF1A,JUN,KLK3,MMP2,MYOG,PLAUR,SPP1	Ap1,CTNNB1,EGR1,ELK1,ERK1/2,FOXO3,HIF1A,HRAS,IL6,MAPK3,NFkB (complex),PPARG,PRKCD,RAC1,SMAD1,SMAD3,SMAD4,SP1,SRC,SREBF1,curcumin
TSC2	-0.093	other	Inhibited	-2.333	-2.367	0.000114	ACSS2,ATF3,CDKN1A,DPP7,EGR1,ERO1A,FOS,HIF1A,LGR5,SCD,THRSP
ID1	-0.598	transcription regulator		1.496	1.515	0.000116	CCN2,CDKN1A,EGR1,FABP4,MMP2,MYOG,SCD,TF
SGK1	0.744	kinase		-1.134	-1.088	0.000116	CCN2,CDKN1A,CEBPA,FABP4,HBEGF,KCNA5,PPARG,SLC3A2
IGF2	0.642	growth factor		1.727	1.747	0.000118	CCN2,CDKN1A,EGR1,EGR2,EREG,GADD45A,H19,HBEGF,HIF1A,LEP,MYOG,SERPINE1,SPP1
Am 580		chemical toxicant	Activated	2.607	2.626	0.00012	CYP26B1,CYP2E1,FASN,LIPE,PPARG,SCD,SOX9
platelet activating factor		chemical - endogenous mammalian	Activated	2.573	2.618	0.00012	CDKN1A,EGR1,EGR2,FOS,MMP2,PLAUR,SERPINE1	Ap1,CTNNB1,EGR1,ELK1,ERK,ERK1/2,FGF2,FOXO3,HIF1A,IL6,Jnk,NFkB (complex),PDGF BB,SMAD1,SMAD3,SP1,SRC,SREBF1,STAT6,platelet activating factor
thioctic acid		chemical drug		-1.109	-1.136	0.00012	ABCC1,FABP4,FOS,JUN,LEP,MMP2,SLC7A11
RASSF1	0.196	other		-0.213	-0.208	0.000121	CDKN1A,EGR1,FOS,GDF15,HBEGF,MMP2,NOG,SOX9,SPP1
ERK		group	Activated	3.098	3.15	0.000121	CCN2,CDKN1A,EGR1,EGR2,EREG,FABP4,FOS,GDF15,HBEGF,HOMER1,JUN,MMP2,PDGFC,SERPINE1,VCAN	Ap1,CTNNB1,EDN1,EGR1,ELK1,ERK,ERK1/2,FOXO3,HIF1A,NFkB (complex),PPARG,SMAD1,SMAD3,SMAD4,SP1,STAT6,nitric oxide
cholesterol		chemical - endogenous mammalian		1.782	1.811	0.000121	ACSS2,APP,ATF3,CES1,CNN1,DBI,FABP5,FASN,HBEGF,KCNA5,MMP2,MYH11,Orm1 (includes others),PPARG,SCD
NR1I3	-0.413	ligand-dependent nuclear receptor		-1.316	-1.257	0.000122	Aldh1a7,CDKN1A,DIO1,FASN,Gstt1,LRG1,SCD,STEAP4,Sult1a1,THRSP
KDM1A	0.143	enzyme		1.206	1.188	0.000122	ADCY5,CDKN1A,FASN,HIF1A,HSD11B1,KLK3,LGR5,MCM6,PTTG1,RETN,SCD,SERPINE1,SLC22A3,SLC7A10
PRKAG3	0.862	other				0.000126	CES1,CIDEC,EGR1,IRX3,LEP,MAFA,MMD,NEO1,NOS1,SNCG,SOX17,THRSP,TSPAN8
estrogen		chemical drug		0.458	0.509	0.000127	CCN1,CCN2,CDKN1A,COL15A1,COL5A1,EGR1,FOS,HBEGF,HIF1A,JUN,NOS1,PLIN4,PTTG1,SERPINA3,SERPINE2,SPP1,TNFRSF11B
bisindolylmaleimide iv		chemical - kinase inhibitor		-1.455	-1.493	0.000128	CCN2,CYP2E1,EGR1,FABP4,FOS
aldosterone		chemical - endogenous mammalian		1.852	1.904	0.000133	ADIPOQ,AGTR2,CCN2,EMB,FABP4,FOS,MMP2,PLAUR,PPARG,SERPINE1,SPP1
ACVR1	1.048	kinase				0.000133	CDKN1A,EDIL3,HHIP,Ifi27l2a/Ifi27l2b,NOG,SRPX2
PIAS1	-0.193	transcription regulator		-0.6	-0.602	0.000133	CDKN1A,FASN,GADD45A,MYH11,MYOG,SCD
TLR7/8		group		0.816	0.868	0.000133	EREG,FFAR2,GEM,PLAUR,SLC7A11,TRIB3
TCF		group		1.964	2.011	0.000134	EGR1,FOS,KLK3,LGR5,MMP2,SERPINA3,SERPINE1,SOX9,TSPAN8
S100A8	0.71	other		0.898	0.917	0.000135	ATF3,BCHE,CD274,FCGR2A,H19,LOC102724788/PRODH,MMP2,MYH8,PDGFC,ROBO2,STAC2,UGT1A6,VCAN
GNRH1	-0.624	other		1.635	1.666	0.000138	APP,EGR1,EGR2,FOS,HSD11B1,JUN,NOS1
paclitaxel		chemical drug		-0.13	-0.109	0.00014	ALDH1L1,ATF3,CCN2,CD274,CDKN1A,CYP2E1,EGR1,EREG,GDF15,HBEGF,HIF1A,HLA-A,JUN,KLK3,NNAT,PLAUR,TUBA1B
6,7-dinitroquinoxaline-2,3-dione		chemical reagent				0.000142	EGR1,FOS,JUN
DYNLL1	-0.047	other				0.000142	CDKN1A,FOS,NOS1
GCLM	0.236	enzyme				0.000142	FOS,GPT,JUN
LGALS12	-3.833	other				0.000142	CEBPA,LEP,PPARG
SERPINA12		other				0.000142	ADIPOQ,LEP,RETN
EIF2AK3	0.432	kinase		1.966	1.998	0.000145	ASNS,ATF3,CYB5R1,EGR1,ERO1A,GADD45A,IARS1,JUN,PCK2,SLC1A4
FGF7	0.614	growth factor		-1.73	-1.691	0.000146	CDKN1A,CEBPA,FABP5,FASN,FGF1,MMP2,SCD,SERPINE1
OGA	0.075	enzyme		0.474	0.469	0.000148	ACSS2,ADAMTS17,ADIPOQ,AGTR2,CCBE1,CDKN1A,CEBPA,CNN1,EGR2,FGF21,GADD45A,IP6K3,JUN,LEP,MGLL,PHKA2,PLAAT3,SERPINE2,SLC27A1,SOX9,TNC,TNFRSF11B
ACACB	-0.788	enzyme		0.686	0.66	0.000152	FASN,LEP,PPARG,SCD
F10		peptidase		1.974	2.022	0.000152	CCN1,CCN2,EGR1,MMP2
IDH2	-0.514	enzyme				0.000152	ADIPOQ,CEBPA,EGR1,PPARG
CREBBP	-0.277	transcription regulator		0.669	0.72	0.000153	CCN1,CDKN1A,CEBPA,COL2A1,EGR1,EGR2,ESAM,FABP4,FOS,GFRA1,GRIN3B,HSD11B1,IL17RE,JUN,KLK3,RETN,SERPINA3,SERPINE2,SLC7A11,THRSP,TNC
DCN	0.302	other		0.23	0.223	0.000158	CCN2,CDKN1A,FBN1,HIF1A,MMP2,MYOG,SERPINE1
SNAI2	1.195	transcription regulator		0.239	0.253	0.000158	Acan,CCN1,CCN2,CDKN1A,COL2A1,EGR2,SOX9
carbon monoxide		chemical - endogenous mammalian		0.565	0.547	0.000158	CDKN1A,EGR1,GPT,HIF1A,LEP,PLAUR,SERPINE1
iron		chemical - endogenous mammalian		-0.973	-0.971	0.000158	APP,CDKN1A,CEBPA,GADD45A,HIF1A,SUCNR1,TF
sucrose		chemical - endogenous mammalian		-1.816	-1.778	0.000159	ACSS2,APP,FASN,FOS,LEP,SCD
NFIL3	-0.384	transcription regulator	Inhibited	-2.219	-2.211	0.000162	CDKN1A,FASN,FGF21,GADD45A,SCD
PRKAR2B	-3.116	kinase		-1.225	-1.191	0.000162	EGR1,FOS,LEP,PPARG,PRKAR2B
STS		enzyme		1.414	1.426	0.000162	ADIPOQ,FABP4,LIPE,PNPLA2,PPARG
AICAR		chemical - endogenous mammalian		-0.882	-0.875	0.000164	CDKN1A,FASN,HSD11B1,MSTN,PNPLA2,PPARG,SCD,SERPINE1
IRAK4	0.146	kinase				0.000164	APP,ATF3,EGR1,ERRFI1,FOS,GEM,JUN,PPARG
sulindac sulfide		chemical drug		1.608	1.603	0.000164	APP,ATF3,BCAM,CCN2,CDKN1A,EGR1,GADD45A,GDF15
MEF2C	0.896	transcription regulator		1.093	1.143	0.000167	ATF3,CCBE1,CDKN1A,COL2A1,EGR2,FOS,FRZB,GJA5,JUN,KCNA5,MYOG
BCL3	-0.66	transcription regulator		-1.25	-1.265	0.00018	CD274,EGR1,EGR2,FOS,JUN,PLAUR,STAP2
MAP3K1	-0.772	kinase	Activated	2.564	2.612	0.00018	ATF3,EGR1,FOS,JUN,PLAUR,SERPINE1,TNC	Ap1,CTNNB1,EGR1,ELK1,ERK,ERK1/2,FOXO3,HIF1A,Jnk,MAP2K1/2,MAP2K4,MAP3K1,MAPK3,NFkB (complex),SMAD1,SMAD3,SMAD4,SP1,STAT6,ZFP36
clozapine		chemical drug		1.452	1.497	0.00018	EGR1,FASN,FOS,HOMER1,PRKAR2B,SCD,TAC1
telmisartan		chemical drug		-0.692	-0.698	0.00018	ADIPOQ,CCN1,CCN2,GPT,LEP,PLIN1,PPARG
PAK2	0.007	kinase		-0.816	-0.825	0.000187	GADD45A,HBEGF,NOX4,PLAUR,PROX1,SMAD9
CCR2	0.732	g-protein coupled receptor	Activated	2.36	2.406	0.000203	ADIPOQ,APP,FBN1,GPT,LUM,MMP2,SLPI,TIMP4,TNC,VCAN
MTTP	0.414	transporter		1.455	1.436	0.000203	CFD,CIDEC,GPT,JUN,PPARG
P2RY2	0.1	g-protein coupled receptor		0.314	0.353	0.000203	CDKN1A,HIF1A,JUN,SERPINE1,TF
PD 123319		chemical drug		-0.651	-0.653	0.000203	AGTR2,FASN,MYOG,SERPINE1,SPP1
arotinoid acid		chemical toxicant		-0.374	-0.341	0.000203	CDKN1A,FOS,SCD,SOX17,SOX9
thioacetamide		chemical toxicant		1.857	1.917	0.000204	AACS,ASNS,CCN2,CIDEC,F2R,FBN1,FCGR2A,FOS,HIF1A,JUN,MCM6,MMP2,SLC7A11,SPP1,TSPAN8,UGT1A6
BIRC5	0.028	other				0.000205	CCN2,CDKN1A,COL5A2,FBN1,LUM,MMP2,PTTG1
IL1R1	-0.594	transmembrane receptor		1.408	1.442	0.000205	ABCC1,APP,EGR1,FOS,LEP,MMP2,MYH11
MAP2K4	0.119	kinase	Activated	2.598	2.655	0.000205	ATF3,CDKN1A,ERRFI1,FOS,GADD45A,JUN,PPARG	Ap1,CTNNB1,HIF1A,MAP2K4,MAP3K1,NFkB (complex),SMAD3,SP1,ZFP36
PTGES	-0.829	enzyme		1.353	1.381	0.000205	CCN2,CDKN1A,EGR1,NOS1,NOX4,PPARG,SERPINE1
mir-27	0.383	microrna		0.283	0.262	0.000205	HOXA5,MSTN,MYOG,PKMYT1,PPARG,RUNX1,SMAD9
GLI1	-0.212	transcription regulator		0.356	0.43	0.000206	CDH11,CDKN1A,COL2A1,EMB,FGF1,HHIP,HOXA5,KLK3,MMP2,NOG,SOX18,SOX9,SPP1,TNC
methapyrilene		chemical drug		0.816	0.813	0.000208	Apoc3,ATF3,CES1,DBI,GADD45A,GFRA1,IGFALS,PC,SCD,SLC3A2,Sult1a1
GPD1	-2.106	enzyme				0.000215	APP,ASNS,GADD45A,GPAT3,Mup1 (includes others),SERPINA3,SERPINE2,SUCNR1,Wfdc21
ATP2A2	0.863	transporter	Activated	2	1.974	0.000215	APP,DGAT2,FASN,SCD	ATP2A2,CTNNB1,PPARG,SREBF1
glyburide		chemical drug				0.000215	ADIPOQ,AGTR2,FOS,PPARG
1,4-bis[2-(3,5-dichloropyridyloxy)]benzene		chemical toxicant		-0.383	-0.333	0.00022	CDKN1A,DIO1,FASN,LRG1,MCM6,PNPLA2,SCD,STEAP4,Sult1a1,THRSP
Hsp27		group		-1.4	-1.407	0.00022	CD274,CDKN1A,FOS,KLK3,NOX4,TRIM63
N-acetylsphingosine		chemical reagent		0.547	0.565	0.00022	CDKN1A,FOS,HSD11B1,JUN,MYOG,SERPINE1
herbimycin		chemical - kinase inhibitor	Inhibited	-2.433	-2.469	0.00022	CCN2,F2R,FOS,MMP2,SERPINE1,TNFRSF11B	Ap1,CTNNB1,EGR1,ELK1,ERK,ERK1/2,FOXO3,HIF1A,IL6,Jnk,NFkB (complex),SMAD1,SMAD3,SP1,SRC,SREBF1,STAT6,herbimycin
ibuprofen		chemical drug		-0.328	-0.353	0.00022	APP,GDF15,HIF1A,MMP2,PPARG,SERPINA3
SFTPA1		transporter		-1.414	-1.441	0.000226	CCN1,CCN2,EGR1,FOS,HBEGF,RASD1,SERPINE1,SLC22A3
trovafloxacin		chemical drug		1.414	1.44	0.000226	CDKN1A,CEBPA,ERRFI1,FASN,FOS,HLA-A,NEDD4L,SERPINE1
YAP1	-0.146	transcription regulator		1.737	1.79	0.000231	CCN1,CCN2,CD274,CDKN1A,EGR1,FASN,FGF1,FOS,GADD45A,MCM6,MYOG,Rpl29 (includes others),SERPINE1,SOX9,TRIM63
ELK1	0.156	transcription regulator	Activated	2.552	2.598	0.000233	CDKN1A,EGR1,EGR2,FOS,JUN,SLC7A11,SPP1	Ap1,CTNNB1,ELK1,ERK,FOXO3,MAPK3,NFkB (complex),SMAD3,SP1,STAT6
CEBPD	0.39	transcription regulator		-0.103	-0.072	0.000235	ASNS,CDKN1A,CYP2E1,FABP4,FOS,HIF1A,HP,LEP,PPARG
F2R	2.252	g-protein coupled receptor	Activated	2.952	3.001	0.000235	CCN1,CCN2,CDH11,EGR1,F2R,FOS,MMP2,MYOG,PLAUR	Ap1,CTNNB1,EGR1,ELK1,ERK,ERK1/2,F2R,FOXO3,HIF1A,NFkB (complex),PPARG,RAC1,SMAD1,SMAD3,SMAD4,SP1,SRC,STAT6,TGFB1,ZFP36,nitric oxide
SLC25A13	0.956	transporter				0.000235	APP,ASNS,GADD45A,GPAT3,Mup1 (includes others),SERPINA3,SERPINE2,SUCNR1,Wfdc21
WNT1		cytokine		1.492	1.544	0.00024	APCDD1,CDKN1A,CEBPA,DLL1,EGR1,FOS,JUN,PPARG,SERPINE1,SERPINE2,SPP1
acetaminophen		chemical drug		0.728	0.755	0.00024	ABCC1,CA3,CDKN1A,CES1,CYP2E1,GADD45A,GPT,HIF1A,JUN,PLAUR,TF
PTGS2	1.765	enzyme		0.774	0.806	0.000243	ADCY5,CDKN1A,EGR1,FABP4,FOS,HBEGF,LEP,MMP2,Pde4d,PPARG,PTGER3,RETN
raloxifene		chemical drug	Activated	2.331	2.333	0.000243	CDKN1A,F2R,JUN,LUM,MMD,MMP2,PTGER3,PTTG1,SERPINE1,SNCG,SPP1,TNFRSF11B	Ap1,FOXO3,IL6,NFkB (complex),SMAD3,SP1,SREBF1,raloxifene
GnRH-A		chemical reagent	Activated	2.254	2.27	0.000251	ATF3,CDKN1A,EGR1,EGR2,FOS,JUN,RASD1,SERPINE1	Ap1,CTNNB1,ELK1,ERK,FOXO3,GnRH-A,MAPK3,NFkB (complex),SMAD3,SP1,STAT6
MYOCD	-2.455	transcription regulator		-1.643	-1.617	0.000251	CCBE1,CDKN1A,CNN1,COL2A1,FOS,GJA5,MYH11,VCAN
PTPN11	-0.277	phosphatase		-0.099	-0.098	0.000251	CDKN1A,CEBPA,EGR1,FASN,FOS,JUN,PLAUR,TAC1
RXRB	-0.097	ligand-dependent nuclear receptor				0.000251	CD109,FABP4,FASN,HBEGF,MMP2,SPP1,THRSP,VCAN
dehydroisoandrosterone		chemical - endogenous mammalian		1.035	1.019	0.000251	EDIL3,FABP4,HSD11B1,KCNA5,KLK3,PPARG,SCD,SLC27A1
Mapk		group		1.949	2.005	0.000257	APP,CDKN1A,EGR1,FOS,JUN,LEP,NOS1,SNCG,SPP1
KCNK9		ion channel		-0.128	-0.142	0.000258	ACVR1C,HP,KCNK3,SLC16A3,SNCG,TAC1
TFE3	0.075	transcription regulator		0.728	0.775	0.000258	FASN,PNPLA2,PPARG,SCD,SERPINE1,THRSP
carbamylcholine		chemical drug		1.791	1.82	0.000258	APP,CDKN1A,EGR1,FOS,GEM,JUN
pimagedine		chemical drug		-1.732	-1.752	0.000258	CCN2,CNN1,HBEGF,NOS1,SERPINE1,SLC22A3
Ap1		complex	Activated	2.588	2.644	0.000276	ATF3,CCN2,FABP4,FOS,JUN,KLK3,MMP2,NOG,SERPINE1,SNCG,XYLT1	Ap1,CTNNB1,HIF1A,NFkB (complex),SMAD3,SP1
(+)-MK-801		chemical drug	Inhibited	-2.14	-2.129	0.000278	APP,CDKN1A,EGR1,FOS,GJA4,GJA5,JUN,TAC1	(+)-MK-801,Ap1,CTNNB1,EGR1,ELK1,ERK,ERK1/2,FOXO3,HIF1A,Jnk,NFkB (complex),SMAD1,SMAD3,SP1,STAT6,nitric oxide
MAPK3	-0.528	kinase	Activated	2.392	2.429	0.000278	CDKN1A,EGR1,EGR2,FOS,HOMER1,JUN,PLAUR,SPP1	Ap1,CTNNB1,EGR1,ELK1,ERK,ERK1/2,FOXO3,HIF1A,MAPK3,NFkB (complex),SMAD1,SMAD3,SP1,STAT6
RUNX3	-0.105	transcription regulator	Inhibited	-2.114	-2.164	0.000278	ABCC1,CCN1,CCN2,CDH11,CDKN1A,FBN1,MMP2,REEP1,RUNX1,SPP1
TMPRSS2-ERG		fusion gene/product		-1.897	-1.889	0.000278	CHAC1,COL5A1,EREG,GDF15,HCAR1,LTBP2,PCK2,PPARG,SLC7A11,TRIB3
2,5-bis(5-hydroxymethyl-2-thienyl)furan		chemical reagent				0.000278	CDKN1A,GADD45A,HIF1A
AATF	0.389	transcription regulator				0.000278	APP,CDKN1A,JUN
ACLY	-0.417	enzyme				0.000278	ACSS2,FASN,SCD
HMGCR	0.568	enzyme				0.000278	CCN1,CCN2,PRNP
Irs3	-2.474	other				0.000278	EGR1,FASN,LEP
Muscarinic cholinergic receptor		group				0.000278	CCN1,FOS,JUN
OBP2B		transporter				0.000278	FASN,PPARG,SCD
SERPINA3	-3.462	other				0.000278	APP,CCN2,NOX4
SIK3	-0.047	kinase				0.000278	ADIPOQ,GPT,LEP
THRSP	-3.6	other				0.000278	DIO1,FASN,THRSP
TRIB1	-0.178	kinase				0.000278	CEBPA,FASN,SCD
jasplakinolide		chemical - endogenous non-mammalian				0.000278	CCN1,CCN2,SOX9
genistein		chemical drug		0.788	0.82	0.000283	CCN2,CDKN1A,CEBPA,CFD,DIO1,EREG,FOS,GDF15,HIF1A,HLA-A,HS3ST3A1,JUN,KLK3,MAL2,MMP2,PPARG,SERPINE1,SPP1,TNFRSF11B,XYLT1
DGAT1	-2.041	enzyme		-1.067	-1.036	0.000295	DGAT2,LEP,PNPLA2,PPARG
ENPP2	0.416	enzyme	Activated	2	1.966	0.000295	ADIPOQ,FABP4,LEP,PPARG
Foxo		group				0.000295	CDKN1A,GADD45A,TRIB3,TRIM63
ID4	-0.535	transcription regulator		-1.973	-1.996	0.000295	CDKN1A,CEBPA,MMP2,PPARG
SOCS2	-0.412	other				0.000295	FASN,LIPE,MYOG,PPARG
THRAP3	-0.015	transcription regulator		1.987	1.948	0.000295	ADIPOQ,CA3,CFD,RARRES2
leukotriene C4		chemical - endogenous mammalian		1.969	2.016	0.000295	APP,EGR1,EGR2,FOS
tranylcypromine		chemical drug		-1	-0.986	0.000295	CD274,CDKN1A,FOS,HIF1A
ADRB2	0.148	g-protein coupled receptor	Activated	2.449	2.474	0.0003	ADIPOQ,FASN,LEP,RETN,SPP1,TNFRSF11B	ADRB2,CTNNB1,PPARG,SREBF1
roscovitine		chemical drug		-0.243	-0.281	0.0003	APP,CCN2,CDKN1A,CEBPA,FABP4,PPARG
fulvestrant		chemical drug		-0.079	-0.1	0.0003	ASNS,CCN1,CDKN1A,EGR1,F2R,FOS,GADD45A,JUN,KLK3,MMD,NOS1,PPARG,PTGER3,PTTG1,SNCG,TNFRSF11B
MIR17HG	-0.973	other		-1.454	-1.512	0.0003	APCDD1,APP,CD274,CDKN1A,COL5A1,DLL1,HIF1A,HOXA5,LRP6,PTK7
glutamine		chemical - endogenous mammalian		-1.252	-1.271	0.000306	ASNS,CDKN1A,FABP5,FGF21,FOS,GADD45A,HIF1A,JUN,PCK2
miR-30c-5p (and other miRNAs w/seed GUAAACA)		mature microrna		-1.676	-1.755	0.000317	CCN2,COL5A1,COL5A2,CRTAP,JUN,MAFA,PLOD2,PPARG,SLC7A11,SLC9A3R2,VCAN
medroxyprogesterone acetate		chemical drug		-0.685	-0.691	0.000339	CCN1,FASN,HSD11B1,JUN,RARRES2,REEP1,ROBO1,SCD,SLPI,TNC,VCAN
AREG		growth factor	Activated	2.178	2.201	0.000339	CDH11,EGR1,EREG,FOS,HCAR2,ITGB8,JUN,RUNX1	AREG,Ap1,CTNNB1,ELK1,ERK,FOXO3,MAPK3,NFkB (complex),SMAD3,SP1,STAT6
SB 216763		chemical toxicant		-0.199	-0.161	0.000347	CCN1,CCN2,FASN,MYH11,MYOG,SCD
eicosapentenoic acid		chemical drug		0.169	0.159	0.000362	ADIPOQ,FBN1,FOS,JUN,LEP,PNPLA2,PPARG,SERPINE1,THRSP
JUNB	0.701	transcription regulator	Activated	2.137	2.182	0.000362	ATF3,CD274,CFD,FASN,LIPE,MMP2,PLAUR,PLIN1,PNPLA2,SCD,SERPINE1
NKX2-3		transcription regulator		0.212	0.211	0.000371	AOC3,ASNS,BCHE,CD300LG,CDKN1A,GDF15,MFNG,MYH11,REEP1,SERPINE2,SNCAIP,SRPX2,TRIM5
MACROH2A1	-0.295	other		-0.378	-0.395	0.000373	CDKN1A,EGR1,FASN,FGF1,GADD45A,PPARG,SERPINE1,THRSP
TAC1	3.362	other		1.092	1.147	0.000373	CCN1,FOS,HIF1A,NOS1,SERPINE1,SOX13,TAC1,TNFRSF11B
C1QA	-0.201	other	Inhibited	-2.236	-2.218	0.000374	CD274,EGR1,F2R,SERPINA3,SERPINE1
ELOVL5	-0.333	enzyme		0.398	0.365	0.000374	FASN,FGF21,PNPLA2,SCD,TRIB3
FGFR4	-0.953	kinase				0.000374	CDKN1A,DGAT2,FASN,FOS,SERPINE1
ROCK1	-0.077	kinase		0.246	0.295	0.000374	APP,CCN2,CNN1,COL5A1,FBN1
leucine		chemical - endogenous mammalian		-0.692	-0.692	0.000374	ASNS,ATF3,CDKN1A,FASN,FOS
miR-335-3p (miRNAs w/seed UUUUCAU)		mature microrna		-1.342	-1.396	0.000374	COL5A1,COL5A2,CRTAP,PLOD2,VCAN
Tgf beta		group	Activated	3.826	3.864	0.000394	AOC3,CCN1,CCN2,CDH11,CDKN1A,COL5A1,EGR2,FOS,GREM1,JUN,MMP2,NOX4,RUNX1,SERPINE1,SPP1,TNFRSF11B	Ap1,CTNNB1,EGR1,ELK1,ERK,ERK1/2,FOXO3,HIF1A,IL6,Jnk,MAPK3,NFkB (complex),PPARG,PRKCD,SMAD1,SMAD3,SMAD4,SP1,SREBF1,STAT6,TGFB1,Tgf beta,ZFP36
OMA1	0.027	peptidase	Activated	2	2.016	0.000394	FASN,GPT,LEP,SCD
PLAGL1	0.823	transcription regulator		-1.231	-1.196	0.000394	CDKN1A,FABP4,LOC102724788/PRODH,PPARG
SPINT1		other		0	-0.048	0.000394	APCDD1,PROX1,PTK7,SOX17
magnolol		chemical - endogenous non-mammalian				0.000394	CDKN1A,FOS,HIF1A,MMP2
tetrachlorodibenzodioxin		chemical toxicant		0.641	0.645	0.000399	ASNS,CA3,CCN1,CDKN1A,CES1,COL9A2,CYP4B1,FOS,JUN,KCNA5,MYH11,PON1,PRKAR2B,PTGFR,Rpl29 (includes others),SERPINE1,STEAP4,TNC,UGT1A6
mycophenolic acid		chemical drug		1.414	1.459	0.000411	ATF3,CCN1,CCN2,CD274,CDKN1A,DUSP14,HBEGF,SERPINE1
BDNF	-0.082	growth factor	Activated	2.577	2.618	0.000416	Ank2,APP,CCN1,CDKN1A,EGR1,EGR2,FOS,HOMER1,JUN,LEP,MYH8,MYOG,NECAB3,NOS1,SPP1,TAC1,TNFRSF11B	Ap1,BDNF,CTNNB1,EGR1,ELK1,ERK,ERK1/2,FAS,FOXO3,HIF1A,MAP2K1/2,MAPK3,NFkB (complex),SMAD1,SMAD3,SP1,SRC,STAT6,nitric oxide
AGER	-1.418	transmembrane receptor		1.043	1.071	0.00042	APP,CDKN1A,EGR1,MMP2,MYOG,SERPINE1,TNC
FBXW7	0.104	enzyme		1.964	1.911	0.00042	APP,CIDEC,DGAT2,FABP4,JUN,PPARG,SERPINE1
SCD	-2.395	enzyme		-0.877	-0.897	0.00042	ADRB3,ATF3,FASN,GADD45A,LEP,LIPE,SLC27A1
hyaluronic acid		chemical - endogenous mammalian		0.777	0.805	0.000426	COL2A1,FOS,JUN,MMP2,NOG,PPARG,SERPINE1,SOX9,SPP1
metformin		chemical drug		0.101	0.091	0.00044	ADIPOQ,ATF3,CCN2,FASN,FGF21,FOS,LEP,MSTN,RARRES2,RETN,SERPINE1
EIF4EBP1	-0.114	translation regulator		-1.104	-1.134	0.00045	CEBPA,EGR1,LEP,PNPLA2,PPARG
BAPTA-AM		chemical reagent	Inhibited	-2.433	-2.471	0.000459	ATF3,CDKN1A,EGR1,FOS,JUN,MMP2	Ap1,BAPTA-AM,CTNNB1,EGF,EGR1,ELK1,ERK,ERK1/2,FOXO3,HIF1A,HRAS,Jnk,MAPK3,NFkB (complex),PRKCB,SMAD1,SMAD3,SMAD4,SP1,SRC,SREBF1,STAT6,nitric oxide
MSTN	3.355	growth factor		0.378	0.387	0.000459	CDKN1A,HIF1A,LEP,MYOG,TNC,TRIM63
IL13		cytokine		1.124	1.174	0.000459	ATF3,BPIFC,CCN2,CEBPA,EGR1,FABP4,FCGR2A,HSD11B1,IARS1,JUN,MMP2,MYOG,PDGFC,PPARG,SERPINE1,SLPI,SPINT2,SPP1,TIMP4,TNFRSF11B
Calcineurin protein(s)		complex		-0.263	-0.231	0.000469	DUSP14,EGR1,EGR2,FOS,MYOG,SERPINE1,SPP1
GHRL		growth factor		-0.446	-0.43	0.000469	FASN,FOS,LEP,MYOG,PPARG,SCD,SPP1
NRIP1	-0.796	transcription regulator		0.447	0.42	0.000469	CDKN1A,CYP4B1,FASN,MMD,SCD,SLC36A2,THRSP
sodium chloride		chemical - endogenous mammalian	Activated	2.007	2.058	0.000469	AGTR2,CCN2,FOS,HIF1A,NOS1,NOX4,SPP1	Ap1,CTNNB1,EGR1,ELK1,ERK1/2,FOXO3,HIF1A,NFkB (complex),SMAD1,SMAD3,SMAD4,SP1,Tgf beta,sodium chloride
ciprofibrate		chemical drug		-0.282	-0.285	0.000469	CYP2E1,DBI,DIO1,FABP4,HSD11B1,MGLL,Mup1 (includes others),Orm1 (includes others),PPARG,PXMP2,SCD
1L-6-hydroxymethyl-chiro-inositol 2-(R)-2-O-methyl-3-O-octadecylcarbonate		chemical - kinase inhibitor				0.000478	GDF15,MMP2,PPARG
ACACA	-1.382	enzyme				0.000478	FASN,PPARG,SCD
AFP		transporter				0.000478	EGR1,EGR2,FOS
G protein alphai		group				0.000478	F2R,FCGR2A,MYH11
GNE	-0.111	kinase				0.000478	ASNS,CHAC1,TRIB3
GPAT3	-2.627	enzyme				0.000478	DGAT2,GPT,PPARG
MAD2L1	0.112	other				0.000478	LGR5,PTTG1,SOX9
NTS		other				0.000478	FOS,GPT,KLK3
QRFP		other				0.000478	CEBPA,PPARG,SLC27A1
SLC39A14	0.895	transporter				0.000478	FASN,GPT,SCD
SULF1	1.405	enzyme				0.000478	Acan,COL2A1,NOG
Smad2/3/4		group				0.000478	CCN2,NOX4,SERPINE1
butylhydroxybutylnitrosamine		chemical toxicant				0.000478	CDKN1A,HBEGF,UGT1A6
ciclopirox olamine		chemical drug				0.000478	CDKN1A,HIF1A,TF
FAS	-0.224	transmembrane receptor	Inhibited	-2.311	-2.318	0.000481	CCN2,CDC42EP2,CDKN1A,COL15A1,COL5A1,EGR1,EGR2,FBN1,FOS,ITGB8,JUN,LUM,P2RX1,SERPINE1,SLPI,SPP1,TNC,TNFRSF11B	Ap1,CTNNB1,EGR1,ELK1,ERK,ERK1/2,FAS,FOXO3,HIF1A,Jnk,MAP3K1,MAPK3,NFkB (complex),PRKCB,PRKCD,SMAD1,SMAD3,SP1,STAT6,ZFP36
RARA	-0.565	ligand-dependent nuclear receptor		0.163	0.165	0.000481	CDKN1A,CEBPA,CYP26B1,EGR1,EGR2,FGF21,FOS,GDF15,HOXA5,JUN,KLK3,PTTG1,RASD1,RUNX1,SLC7A11,SOX17,SPP1,TNFRSF11B
simvastatin		chemical drug		-1.523	-1.537	0.000487	ADIPOQ,APP,CCN1,CCN2,CDKN1A,F2R,FOS,GPT,MMP2,PON1,SERPINE1,SPP1,TNFRSF11B
DIO2	0.927	enzyme		0.816	0.812	0.0005	ATF3,EGR1,FOS,GFRA1,HAPLN1,LIPG,LUM,Orm1 (includes others),STAC2,Sult1a1
INSIG1	-1.325	other	Activated	2.399	2.332	0.0005	AACS,ACSS2,Apoc1,FABP4,FABP5,FASN,LIPG,PPARG,SCD	INSIG1,PPARG,SREBF1,SREBF2
AGT	-2.534	growth factor	Activated	2.269	2.322	0.000511	ADIPOQ,AGTR2,ATF3,CCN2,CDKN1A,CYP2E1,EGR1,EREG,ERRFI1,FASN,FOS,HBEGF,HIF1A,JUN,LEP,MMP2,NOS1,NOX4,PPARG,PTGFR,SERPINE1,SPP1	AGT,Ap1,CTNNB1,EDN1,EGR1,ELK1,ERK,ERK1/2,FGF2,FOXO3,HIF1A,IL1A,IL6,NFkB (complex),SMAD1,SMAD3,SP1,SREBF1,STAT6,nitric oxide
BMP4	-0.113	growth factor		1.563	1.611	0.000513	CCN1,CDKN1A,CEBPA,CNN1,COL2A1,GREM1,JUN,NOG,PPARG,SMAD9,SOX17,SOX9,TNFRSF11B
CD44	1.234	other		0.115	0.168	0.000513	BCAM,CD274,CDKN1A,CIDEC,COL5A2,FASN,GADD45A,JUN,LTBP2,MMP2,NOX4,SPP1,STEAP1
CCKBR		g-protein coupled receptor				0.000516	ADIPOQ,HIF1A,LEP,RETN
IDO1		enzyme	Activated	2	1.988	0.000516	SLC1A4,SLC3A2,SLC6A9,SLC7A11
PCYT2	-0.814	enzyme		1.982	1.935	0.000516	CIDEC,FASN,PPARG,SCD
S100B	-0.046	other		0.849	0.874	0.000516	APP,CDKN1A,FOS,JUN
acadesine		chemical drug				0.000516	CDKN1A,EGR1,FASN,THRSP
acetyl-L-carnitine		chemical - endogenous mammalian		1	1.042	0.000516	CDKN1A,COX4I2,GADD45A,PPARG
farnesyl pyrophosphate		chemical - endogenous mammalian		0.958	0.97	0.000516	APP,FASN,LIPG,SERPINE1
p85 (pik3r)		group		-1.067	-1.042	0.000516	FASN,HIF1A,MMP2,PPARG
SMAD4	0.161	transcription regulator	Activated	3.256	3.291	0.000529	Acan,CCN2,CDKN1A,COL2A1,EREG,FOS,GADD45A,HEBP1,HP,LOC102724788/PRODH,RUNX1,SCD,SERPINE1,TNC	Ap1,CTNNB1,EGR1,ELK1,HIF1A,NFkB (complex),PPARG,SMAD1,SMAD3,SMAD4,SP1,nitric oxide
Hdac		group		-1.465	-1.465	0.000532	AGTR2,ATF3,CDKN1A,DLL1,EGR1,FOS,HIF1A,IRX3,JUN,ROBO2,SPP1
STAT5A	-0.663	transcription regulator		-1.394	-1.385	0.000537	ADIPOQ,CDKN1A,CEBPA,FABP4,FASN,FOS,GADD45A,ICAM2,Ifitm1,IGFALS,KLK3,MAL2,PPARG,SERPINA3,TIMP4,TSPAN8
HSD11B1	-1.888	enzyme				0.000537	ADIPOQ,FASN,LEP,LIPE,PNPLA2
arginine		chemical - endogenous mammalian		-1.452	-1.437	0.000537	CYP2E1,EGR1,HIF1A,PCK2,SCD
diclofenac		chemical drug		-0.298	-0.304	0.000537	APP,CDKN1A,FOS,GDF15,HIF1A
steroid		chemical - endogenous mammalian		-0.577	-0.555	0.000537	CCN1,CEBPA,FOS,SPP1,TNC
SBDS	-0.037	other				0.00054	CCN2,CHAC1,EGR1,FOS,LGR5,SPP1,TNC,TRIB3
5-N-ethylcarboxamido adenosine		chemical reagent		-0.781	-0.783	0.000541	CCN2,CES1,EGR1,EGR2,GADD45A,HIF1A,SERPINE1,SOX17,VCAN
losartan potassium		chemical drug	Inhibited	-2.248	-2.286	0.000541	AGTR2,CCN2,EGR1,FOS,MMP2,NOS1,NOX4,SERPINE1,SPP1	AGT,Ap1,CTNNB1,EGR1,ELK1,ERK,ERK1/2,FOXO3,HIF1A,IL6,Jnk,NFkB (complex),PPARG,SMAD1,SMAD3,SMAD4,SP1,SREBF1,STAT6,TGFB1,Tgf beta,ZFP36,losartan potassium,norepinephrine
ACOX1	-1.484	enzyme		-1.554	-1.568	0.000566	CDKN1A,DIO1,FABP4,FASN,GADD45A,HSD11B1,MGLL,Mup1 (includes others),Orm1 (includes others),PXMP2,TRIB3
ADRB		group		-0.971	-1	0.000566	AACS,ATF3,CDKN1A,FGF21,FOS,GADD45A,GDF15,JUN,SLC6A9,SLC7A11,SLC9A3R2
2-deoxyglucose		chemical drug		1.709	1.707	0.00058	APP,CDKN1A,FOS,HIF1A,JUN,LEP,SPP1
methamphetamine		chemical drug		0.406	0.424	0.00058	ABCC1,COX4I2,EGR1,FOS,JUN,MMP2,TAC1
candesartan		chemical drug		-0.415	-0.455	0.000597	AGTR2,FOS,LEP,MMP2,SERPINE1,SPP1
EZH2	-0.161	transcription regulator		-1.355	-1.366	0.000602	ATF3,CA6,CDKN1A,CEBPA,COL5A1,CYB5R2,EGR1,FBN1,FRZB,GDF15,Ifi27l2a/Ifi27l2b,KLK3,MAL2,MMP2,PKMYT1,PPARG,RUNX1,SLC7A11,SOX17
8-methyl-pyridoxatin		chemical reagent				0.000602	HIF1A,TF
BATF2	-1.79	other				0.000602	CCN1,JUN
C1QL4		other				0.000602	CEBPA,PPARG
CRTAP	-9.188	other				0.000602	CDKN1A,SERPINE1
FAM120B	-0.036	other				0.000602	ADIPOQ,PLIN1
FBXO25	0.054	enzyme				0.000602	EGR1,FOS
H2BC3		other				0.000602	APCDD1,SOX17
HILPDA	-0.233	other				0.000602	PLIN1,PNPLA2
HMGCS2	-1.937	enzyme				0.000602	CIDEC,FGF21
ING2	-0.138	transcription regulator				0.000602	SERPINE1,SPP1
METTL8	0.171	enzyme				0.000602	CEBPA,PPARG
MIR31HG		other				0.000602	CDKN1A,HIF1A
MRAP2		other				0.000602	LEP,MRAP
NMB	-0.373	other				0.000602	FOS,JUN
NSC 644221		chemical reagent				0.000602	CDKN1A,HIF1A
RETSAT	-0.943	enzyme				0.000602	FABP4,PPARG
RYR3	-0.187	ion channel				0.000602	ADIPOQ,ATF3
ZDHHC7	-0.017	enzyme				0.000602	APP,TF
ZFYVE16	0.134	other				0.000602	CDKN1A,SERPINE1
endrin		chemical toxicant				0.000602	CEBPA,PPARG
loganin		chemical - endogenous non-mammalian				0.000602	CCN2,NOX4
mir-622		microrna				0.000602	HIF1A,PLAUR
tegaserod		chemical drug				0.000602	FOS,TAC1
lovastatin		chemical drug		-0.585	-0.559	0.000614	ADIPOQ,ATF3,CCN2,CDKN1A,FASN,LEP,NOX4,RARRES2,SERPINE1,TNFRSF11B
CBX5	-0.115	transcription regulator		0.707	0.639	0.00063	CDKN1A,ICAM2,KLK3,MAL2,MYOG,PPARG,SERPINA3,TIMP4,TSPAN8
calcimycin		chemical reagent	Activated	2.423	2.467	0.00063	APP,ATF3,EGR1,FOS,HIF1A,JUN,PPARG,SERPINE1,THRSP	Ap1,CTNNB1,EGF,EGR1,ELK1,ERK,FOXO3,HIF1A,IL6,Jnk,NFkB (complex),PPARG,SMAD3,SP1,SREBF1,STAT6,TNF,calcimycin,lysophosphatidic acid,nitric oxide
thyroid hormone		chemical - endogenous mammalian		-0.113	-0.114	0.000631	AGTR2,Apoc1,CDKN1A,DBI,EGR1,FASN,FOS,KCNA5,LEP,NNAT,SERPINE2,THRSP
IgG		complex		0.18	0.147	0.000632	APP,ARSB,CDKN1A,CLDN5,DUSP14,EGR1,EGR2,FABP5,FCGR2A,ITGB8,PLAUR,SERPINE1,TNC
ARRB1	-0.834	other				0.000636	EGR1,FABP4,FASN,SERPINE1,SPP1
H2AZ1	0.231	other				0.000636	AGPAT2,CDKN1A,FABP4,PPARG,SOX17
NFATC4	0.224	transcription regulator				0.000636	ADIPOQ,APP,FABP4,PPARG,SPP1
honokiol		chemical - endogenous non-mammalian		1	0.995	0.000636	ADIPOQ,CDKN1A,FOS,PPARG,RETN
methylnitrosourea		chemical toxicant				0.000636	EGR1,FABP4,FASN,JUN,PLAUR
DICER1	-0.036	enzyme		0.496	0.475	0.000641	ACVR1C,CCN1,CDKN1A,EGR1,EGR2,FCGR2A,FOS,H19,JUN,LGR5,LIPG,LRP6,RUNX1,SERPINE1
EHF		transcription regulator		-0.378	-0.362	0.000644	CCBE1,COL2A1,EREG,KLK3,PLAUR,SERPINA3,SERPINE1,TNC
RHOA	0.041	enzyme		1.065	1.088	0.000644	CCN2,CDKN1A,FOS,GDF15,JUN,MYOG,SDC2,SOX9
AXIN1	-0.01	other		-1.067	-1.091	0.000662	APCDD1,CEBPA,FOS,PPARG
CXCR2		g-protein coupled receptor				0.000662	FABP4,GPT,PPARG,SOX9
EIF4EBP2	-0.2	translation regulator		-0.776	-0.806	0.000662	CEBPA,EGR1,PNPLA2,PPARG
SMAD6	0.042	transcription regulator				0.000662	Acan,SERPINE1,SOX9,SPP1
beta-glycerophosphoric acid		chemical - endogenous mammalian		1.698	1.728	0.000662	Acan,CDKN1A,SPP1,TNFRSF11B
leptomycin B		chemical drug		-0.655	-0.657	0.000662	ABCC1,CDKN1A,CEBPA,FGF1
3-nitropropionic acid		chemical toxicant		1.038	1.052	0.000677	APP,JUN,NOS1,PC,SLC7A11,TAC1
ITGA5	0.455	transmembrane receptor		0.943	0.983	0.000677	CDKN1A,COL2A1,FOS,JUN,MMP2,PLAUR
propylthiouracil		chemical drug				0.000679	Aldh1a7,DIO1,HCAR2,JUN,LOC102724788/PRODH,MYH11,Orm1 (includes others),ROBO1,THRSP
MAPK9	0.238	kinase		-0.006	0.028	0.00068	CCN2,CDKN1A,CIDEC,EGR1,FASN,FOS,GADD45A,HIF1A,JUN,PPARG,SCD
POR	-1.332	enzyme		-0.277	-0.297	0.000704	Aldh1a7,APCDD1,ASNS,EREG,FGF1,HIF1A,HLA-A,Ifitm1,PPARG,PRNP,SCD,SERPINA3
EGLN1	-0.092	enzyme	Inhibited	-2.579	-2.581	0.000711	Acan,COL2A1,DLL1,HIF1A,LEP,SOX9,TNFRSF11B
spironolactone		chemical drug		0.239	0.219	0.000711	ADRB3,AGTR2,CCN2,CDKN1A,FASN,PPARG,SCD
tributyrin		chemical drug		1.89	1.949	0.000711	ATF3,CCN1,CCN2,CD274,CDKN1A,DUSP14,HBEGF
HDAC1	-0.05	transcription regulator		-0.471	-0.485	0.000722	ADIPOQ,ATF3,CDKN1A,CEBPA,COL2A1,COL9A1,EGR1,FABP4,FOS,KLK3,LGR5,PPARG,SERPINE1,SOX9,SPP1
tacrolimus		chemical drug		-0.407	-0.43	0.000738	APP,CEBPA,COL2A1,EGR1,FABP4,FOS,ITGB8,JUN,KCNK3,MYH11,NOS1,PRNP,SPP1,TNC
22(R)-hydroxycholesterol		chemical - endogenous mammalian		-1.476	-1.456	0.000748	APP,FASN,HSD11B1,LIPG,PON1
APEX1	0.171	enzyme	Activated	2.162	2.202	0.000748	ABCC1,EGR1,EGR2,FOS,GFRA1
MALAT1	-1.369	other	Activated	2.236	2.232	0.000748	ADIPOQ,CA3,CFD,CIDEC,RETN
MECOM	-0.349	transcription regulator		1.513	1.547	0.000748	CA3,CDKN1A,CEBPA,SERPINE1,SOX9
Rhox5		transcription regulator		1.147	1.138	0.000748	ADIPOQ,CA3,PPARG,RETN,SCD
11-dehydrocorticosterone		chemical - endogenous mammalian				0.000751	FASN,LIPE,PNPLA2
CCDC80	-0.667	other				0.000751	CEBPA,LEP,PPARG
HEYL	-0.844	transcription regulator				0.000751	KLK3,MMP2,MYH11
Mup1 (includes others)	-5.329	other				0.000751	FASN,PPARG,SCD
PPP1CA	-0.267	phosphatase				0.000751	CCN2,FOS,SPP1
PRRX1	0.962	transcription regulator				0.000751	FOS,SOX9,TNC
SIK1/SIK1B		kinase				0.000751	FASN,SCD,THRSP
SLC5A5		transporter				0.000751	DIO1,Mup1 (includes others),THRSP
WNT5B	0.709	other				0.000751	COL2A1,PROX1,VCAN
pyrophosphate		chemical - endogenous mammalian				0.000751	COL2A1,SOX9,SPP1
Ige		complex		1.835	1.902	0.00076	CDKN1A,EGR1,EGR2,ERRFI1,F2R,FFAR2,GDF15,Gstt1,HBEGF,IARS1,MMD,PPARG,PXMP2,RUNX1,SCD,SPP1,TNC,TNFRSF11B
RARG	0.22	ligand-dependent nuclear receptor		0	0.005	0.000763	CCN2,CYP26B1,EGR1,EGR2,FOS,HOXA5,JUN,KLK3
TFRC	0.653	transporter		-1.673	-1.713	0.000763	ATF3,CDKN1A,CHAC1,ERO1A,FOS,GADD45A,JUN,PPARG
Ccl2	0	cytokine	Activated	2.236	2.268	0.000765	ADIPOQ,ADRB3,CFD,FABP4,LEP,PPARG
IL11	0.909	cytokine	Activated	2.219	2.23	0.000765	COL2A1,FABP4,FOS,PPARG,SERPINA3,SPP1	Ap1,CTNNB1,EGR1,ELK1,ERK1/2,HIF1A,IL11,NFkB (complex),SMAD1,SMAD3,SP1
LPL	-2.034	enzyme		-1.982	-1.969	0.000765	ADIPOQ,FABP4,LIPE,PNPLA2,PPARG,SLC27A1
HGF	0.604	growth factor		1.987	2.057	0.000775	ASNS,ATF3,CCN1,CCN2,CDKN1A,CNTFR,COL2A1,EGR1,ERRFI1,FOS,GEM,GPR4,HBEGF,HOMER1,ITGB8,MMP2,PKMYT1,PLAUR,PTTG1,RARRES2,SERPINE1,SPP1
bisindolylmaleimide I		chemical - kinase inhibitor		-1.698	-1.76	0.000786	CCN2,CDKN1A,EGR1,FOS,GDF15,KLK3,MMP2,PTTG1,SERPINE1
plicamycin		chemical drug		-1.424	-1.449	0.000786	CCN2,CDKN1A,CYP2E1,FASN,HIF1A,PLAUR,SERPINE1,SERPINE2,XYLT1
INSR	-0.43	kinase		-0.104	-0.054	0.0008	ATF3,C2,CCN2,CDKN1A,CEBPA,EGR1,EGR2,EREG,FABP4,FASN,FOS,GADD45A,H19,HBEGF,LEP,MMP2,RTL1,SCD,SERPINE1
EGR2	2.381	transcription regulator		0.87	0.929	0.000811	ABCC1,CDKN1A,CNTFR,EGR1,EGR2,FOS,HOMER1,JUN,NCMAP,ROBO1,SCD
FOXA1		transcription regulator		-0.979	-0.976	0.000811	CDKN1A,CNN1,H19,HHIP,KLK3,MYH11,PRNP,SLPI,SOX9,TF,THBS3
PRL		cytokine		0.501	0.561	0.000822	APP,CDKN1A,CLDN5,COL5A1,EGR1,FOS,IGFALS,JUN,PC,PROX1,PTGFR,RASD1,SERPINA3,SPP1,TUBA1B
NFYA	0.216	transcription regulator		1	1.037	0.000829	CDKN1A,EGR1,FASN,GADD45A,JUN,PTTG1,SCD,THRSP
DDX5	-0.093	enzyme				0.000834	CDKN1A,COL2A1,FOS,JUN
GDF15	3.654	growth factor				0.000834	CDKN1A,GDF15,PLAUR,SERPINE1
LCAT	-0.792	enzyme		-1	-1.005	0.000834	APP,CEBPA,PON1,PPARG
NAB2	0.169	transcription regulator		-0.713	-0.754	0.000834	CDKN1A,FOS,HIF1A,PPARG
Ras homolog		group				0.000834	CCN2,CDKN1A,EGR1,FOS
SULF2	1.204	enzyme				0.000834	Acan,COL2A1,MMP2,NOG
acetaldehyde		chemical - endogenous mammalian		1	1.032	0.000834	FOS,JUN,MMP2,PPARG
propionic acid		chemical - endogenous mammalian		0.713	0.724	0.000834	DUSP14,LEP,RASGRF2,RETN
PRKAA2	1.29	kinase		-1.701	-1.732	0.000845	CDKN1A,CEBPA,EGR1,FABP4,FASN,LEP,NOS1,NOX4,PPARG
PRKCA	1.107	kinase		1.766	1.794	0.000845	APP,CCN2,CDKN1A,EGR1,FOS,GDF15,JUN,RUNX1,SERPINE1
arsenite		chemical toxicant	Activated	2.551	2.585	0.000845	ABCC1,CDKN1A,EGR1,EREG,FGF21,FOS,GADD45A,JUN,SERPINE1	Ap1,CTNNB1,EGR1,ELK1,ERK,FOXO3,HIF1A,Jnk,MAP2K1/2,MAP2K4,MAPK3,NFkB (complex),SMAD3,SP1,STAT6,ZFP36,arsenite
AR	-0.447	ligand-dependent nuclear receptor		0.316	0.374	0.000847	CDH11,CDKN1A,CDO1,DBI,EGR1,EMB,ERO1A,FABP5,GDF15,KLK3,MSTN,MYOG,P2RX1,PKMYT1,PLOD2,SERPINA3,SERPINE1,SLC7A11,SOX9,SPP1,TF,TSPAN8,VCAN
HDAC4	-0.006	transcription regulator		-0.115	-0.124	0.000852	ATF3,CDKN1A,EGR2,FOS,GADD45A,HIF1A,HOMER1,JUN,MYOG,SCRG1
9,10-dimethyl-1,2-benzanthracene		chemical toxicant	Activated	2.415	2.466	0.000862	CDKN1A,GADD45A,HBEGF,JUN,RUNX1,SERPINE1	9,10-dimethyl-1,2-benzanthracene,Ap1,CTNNB1,EGR1,ELK1,ERK1/2,HIF1A,NFkB (complex),SMAD1,SMAD3,SP1
MMP1		peptidase	Activated	2.407	2.457	0.000862	CDKN1A,EGR1,FOS,HIF1A,JUN,SERPINE1	Ap1,CTNNB1,EGR1,ELK1,ERK1/2,HIF1A,IL1A,Jnk,MMP1,NFkB (complex),SMAD1,SMAD3,SP1
FOSB	1.432	transcription regulator		0.94	0.965	0.000874	CEBPA,FOS,MMP2,PPARG,SERPINE1
IHH		enzyme		0.6	0.635	0.000874	HHIP,PTGFR,SPP1,TAC1,TNFRSF11B
PRKG1	0.784	kinase		-0.13	-0.132	0.000874	CCN2,CDKN1A,FOS,PPARG,SERPINE1
phorbol 12,13-dibutyrate		chemical - endogenous non-mammalian		1.732	1.75	0.000874	APP,CDKN1A,FOS,PRNP,SERPINE1
NCOA3	0.265	transcription regulator		-0.748	-0.693	0.000899	CCN1,CCN2,CDKN1A,CEBPA,FASN,MYH11,PPARG,SLC16A3
ZFP36	0.05	transcription regulator	Inhibited	-2.595	-2.654	0.000899	CDKN1A,FGF21,FOS,HIF1A,JUN,PLAUR,SPP1,Wfdc21	CTNNB1,ELK1,FOXO3,HIF1A,Il3,NFkB (complex),SMAD3,SP1,ZFP36
WBP2	-0.295	transcription regulator		-0.333	-0.315	0.000907	EGR1,HHIP,HNMT,JUN,LGR5,LIPG,RARRES2,SLC16A3,SLC7A11
GNAS	-0.008	enzyme	Activated	2.176	2.181	0.000968	CEBPA,FASN,FOS,LEP,PPARG,SPP1
TIMP3	0.899	other	Inhibited	-2.236	-2.264	0.000968	APP,EGR2,FOS,JUN,MMP2,SERPINE1	Ap1,CTNNB1,EGR1,ELK1,ERK1/2,FOXO3,HIF1A,IL6,NFkB (complex),SMAD1,SMAD3,SP1,SREBF1,TIMP3
WWTR1	0.329	transcription regulator		1.698	1.724	0.000968	CCN1,CCN2,CDKN1A,MYOG,SERPINE1,SPP1
salirasib		chemical drug		-1.237	-1.28	0.000968	ATF3,COL5A1,COL5A2,HIF1A,PLOD2,SERPINE1
celecoxib		chemical drug		0.054	0.036	0.000973	APP,CDKN1A,FOS,GADD45A,GDF15,HIF1A,MMP2,PPARG,SERPINE1
poly rI:rC-RNA		biologic drug		0.784	0.853	0.00099	Apol11b (includes others),ATF3,C2,CD274,DIO1,DLL1,EGR1,FOS,GBP6,GDF15,HBEGF,HIF1A,HLA-A,JUN,LIPG,MCM6,MMP2,PCK2,PLAUR,SLPI,TNFRSF11B,Trim30a/Trim30d
HDL-cholesterol		complex	Inhibited	-2.236	-2.263	0.00102	ALDH1L2,CHAC1,EGR1,TRIB3,TRIM66
PRDM16	-1.337	transcription regulator		-0.2	-0.221	0.00102	CDKN1A,FGF21,MYOG,RETN,SERPINE1
ADRB3	-3.345	g-protein coupled receptor		1.177	1.203	0.00104	EGR1,FOS,JUN,LEP
KLF10	0.156	transcription regulator		1.944	1.939	0.00104	CDKN1A,CEBPA,PPARG,SERPINE1
LTBP1	0.872	other				0.00104	COL2A1,ICAM2,SERPINE1,SOX9
MEF2D	0.24	transcription regulator		1.342	1.372	0.00104	CCN2,EGR2,FOS,JUN,MCM6,MYOG,SLC7A11
cerivastatin		chemical drug		-0.79	-0.789	0.00104	CCN2,CDKN1A,DBI,JUN,PLAUR,PPARG,SERPINE1
IL4	-0.412	cytokine		0.474	0.539	0.00105	ARSB,CCN2,Cd1d2,CD274,CDKN1A,CENPB,CLDN5,CYP2E1,EGR2,F2R,FABP4,FASN,FCGR2A,FOS,GBP6,GPT,HBEGF,HSD11B1,JUN,KLK3,LIPG,MMP2,MYOG,PLOD2,PPARG,PRNP,SERPINE1,SOX13,SPINT2,SPP1,Tgtp1/Tgtp2,TINAGL1,TNC,TNFRSF11B,Trim30a/Trim30d
berberine		chemical drug		1.727	1.716	0.00105	ADIPOQ,CDKN1A,CLDN5,CYP2E1,HIF1A,MMP2,PON1,PPARG
mitomycin C		chemical drug	Activated	2.379	2.421	0.00108	ATF3,CDKN1A,EGR1,GADD45A,HBEGF,JUN
ACE	-0.913	peptidase				0.00111	CCN2,SERPINE1,TAC1
CDN1163		chemical reagent				0.00111	DGAT2,FASN,SCD
FRMD6	0.388	other				0.00111	CCN2,CDKN1A,FGF1
LY6K		other				0.00111	CCN2,CD274,SERPINE1
PDE3B	-0.846	enzyme				0.00111	FASN,SERPINE1,TRIB3
PPP1R15B	0.269	phosphatase				0.00111	CHAC1,PPARG,TRIB3
UCHL3	0.393	peptidase				0.00111	ADIPOQ,FABP4,FASN
calmidazolium		chemical drug				0.00111	EGR1,FOS,SOX9
lapatinib		chemical drug				0.00111	EREG,HBEGF,KLK3
PELP1	-0.077	other		-0.152	-0.137	0.00112	ASNS,CES1,FOS,KLK3,LEP,MMP2,PPARG,SLPI,SNCG
Sb202190		chemical - kinase inhibitor	Inhibited	-2.517	-2.556	0.00112	CCN2,CDKN1A,EGR1,FOS,HAPLN1,HIF1A,MMP2,MYOG,SERPINE1	Ap1,CTNNB1,EGR1,ELK1,ERK,ERK1/2,FOXO3,HIF1A,IL6,NFkB (complex),PPARG,SMAD1,SMAD3,SMAD4,SP1,SREBF1,STAT6,Sb202190,TNF
BMP6	0.366	growth factor	Activated	2.393	2.419	0.00114	ARHGAP18,CCN2,CDKN1A,ERRFI1,HBEGF,NOG,SERPINE1,Tgtp1/Tgtp2
NS-398		chemical reagent	Inhibited	-2.415	-2.45	0.00114	CDKN1A,EGR2,F2R,HAPLN1,HIF1A,MMP2,PPARG,SPP1	Ap1,CTNNB1,EGR1,ELK1,HIF1A,NFkB (complex),NS-398,SMAD3,SMAD4,SP1
OGT	0.055	enzyme		-1.234	-1.242	0.00114	APP,ARTN,CDKN1A,FASN,FOS,JUN,MMP2,TNC
GNRH		group	Activated	2.194	2.222	0.00117	ADIPOQ,ATF3,EGR1,FOS,JUN	Ap1,CTNNB1,EGR1,ELK1,ERK1/2,GNRH,HIF1A,Jnk,MAPK3,NFkB (complex),SMAD1,SMAD3,SP1
NOX4	1.958	enzyme		1.487	1.507	0.00117	CDKN1A,HIF1A,MMP2,NOX4,SERPINE1
NFE2L2	0.199	transcription regulator		-1.703	-1.638	0.00118	ABCC1,ATF3,CA3,CCN2,CDKN1A,CEBPA,CFD,FABP4,FMO1,Gstt1,KLK3,MGLL,PPARG,SERPINA3,SERPINE1,SLC1A4,SLC6A9,SLC7A11,THRSP,UGT1A6
valproic acid		chemical drug	Activated	2.011	2.017	0.00119	AACS,ATF3,CCN1,CDKN1A,CEBPA,DBI,FGF21,HAPLN1,HIF1A,HOMER1,JUN,LEP,MCM6,PNPLA2,PPARG,RERG,SCD,SERPINE1,SMAD9,SPP1,THRSP	EGR1,SP1,valproic acid
GNAQ	-0.191	enzyme				0.00119	ATF3,CCN2,CNN1,EGR1,FOS,GADD45A,GJA4,PLAUR,SERPINE1
PTEN	-0.429	phosphatase		-0.036	-0.036	0.00121	ADIPOQ,ATF3,CA3,CD274,CDKN1A,CEBPA,CFD,COL5A2,EGR2,FABP4,FASN,FGF1,FGF21,FOS,GJA5,GPR4,HIF1A,LGR5,LRRFIP1,MMP2,PPARG,PTPRT,RUNX1,SCD,SERPINE1,SPP1,STEAP1,TNFRSF11B
emodin		chemical drug		-1	-1.027	0.00121	ABCC1,ADIPOQ,CDKN1A,CLDN5,LEP,MMP2
leukotriene D4		chemical - endogenous mammalian	Activated	2.39	2.445	0.00121	ATF3,CCN1,EGR1,EGR2,GEM,HBEGF	EGR1,SP1,leukotriene D4
levothyroxine		chemical - endogenous mammalian		-1	-0.988	0.00121	ADIPOQ,CDKN1A,DIO1,FOS,GDF15,SLC7A3
Nfat (family)		group		1.463	1.524	0.00123	ATF3,CCN1,DHRS9,EGR2,FABP4,HBEGF,NOX4,SERPINE1
bexarotene		chemical drug		-1.403	-1.37	0.00125	APP,ASNS,CCN1,CFD,FABP4,MYOG,NOS1,PLAUR,PLOD2,PPARG,SCD,SLC27A1
N-Ac-Leu-Leu-norleucinal		chemical - protease inhibitor	Activated	2.02	2.048	0.00125	APP,CDKN1A,CEBPA,FABP4,HLA-A,MYOG,PTTG1
gentamicin		chemical drug	Activated	3.673	3.696	0.00126	ATF3,CDO1,DIO1,EGR1,EPHX2,FMO1,GADD45A,GDF15,JUN,MCM6,PC,PXMP2,SPP1,Sult1a1
11,12-epoxyeicosatrienoic acid		chemical - endogenous mammalian		-1.982	-1.963	0.00127	ADIPOQ,EPHX2,FABP4,PPARG
MSX1	-0.922	transcription regulator				0.00127	CDKN1A,COL2A1,EGR2,MYOG
NR2C2	0.397	ligand-dependent nuclear receptor				0.00127	CNTFR,GPT,SLC27A1,THRSP
GSK3B	0.501	kinase		1.168	1.162	0.00128	APP,CDH11,CDKN1A,DLL1,FOS,HIF1A,MYOG,SERPINE1,SPP1
GW 4064		chemical toxicant		1.133	1.159	0.00135	ADIPOQ,PCK2,PON1,RARRES2,THRSP,TRIB3
TSHZ3	0.217	transcription regulator		-0.015	-0.007	0.00135	ACVR1C,COL5A1,MYOG,PTGER3,RSPO2,STAC2
CARM1	0.458	transcription regulator				0.00135	CDKN1A,EPHX2,FOS,GADD45A,MYOG
CTBP1	0.031	enzyme		-1.461	-1.487	0.00135	CDKN1A,CYP26B1,FOS,MMD,VCAN
1-methyl-4-phenyl-1,2,3,6-tetrahydropyridine		chemical toxicant		0.739	0.767	0.00136	APP,EGR1,EPHX2,FOS,HOMER1,JUN,NOS1
PRKCE	0.058	kinase		1.386	1.436	0.00136	APP,CCN1,CDKN1A,EGR1,FOS,JUN,PTGER3
SERPINF1	0.326	other		0.14	0.136	0.00149	ADIPOQ,CCN2,CEBPA,LRP6,PPARG,TNFRSF11B
potassium chloride		chemical drug		1.768	1.806	0.00154	ATF3,EGR1,EGR2,FOS,JUN,NOS1,SLC7A3,SPP1
ACSS2	-1.411	enzyme	Inhibited	-2	-1.952	0.00154	DGAT2,FASN,PPARG,SCD
ALDH2	-1.079	enzyme	Inhibited	-2	-2.048	0.00154	SLC1A4,SLC3A2,SLC7A11,SLC7A3
BRD7	0.209	transcription regulator				0.00154	CDKN1A,FASN,SERPINE1,VCAN
EIF4G2	0.503	translation regulator		1.732	1.74	0.00154	CDKN1A,HIF1A,JUN,SERPINE2
FABP1		transporter		0	-0.011	0.00154	FASN,PNPLA2,PPARG,SLC27A1
ITGA1	0.199	other		-0.218	-0.2	0.00154	COL2A1,COL9A2,MMP2,PPARG
MAPK12	-0.839	kinase		1.114	1.12	0.00154	FOS,ITGB8,JUN,MYOG
SRA1	-0.202	transcription regulator	Inhibited	-2	-1.957	0.00154	ADIPOQ,FABP4,LIPE,PPARG	CTNNB1,PPARG,SRA1,SREBF1
TAF6	0.35	transcription regulator				0.00154	ATF3,CDKN1A,GADD45A,JUN
alpha-tocopherol		chemical drug		1.103	1.074	0.00154	ADIPOQ,CCN2,LEP,PPARG
PGF	0.155	growth factor		1.959	1.995	0.00154	ATF3,EGR1,EREG,HIF1A,SERPINE1
everolimus		chemical drug		0.623	0.626	0.00154	CCN2,CDKN1A,LGR5,MMP2,SOX9
propranolol		chemical drug	Inhibited	-2.183	-2.195	0.00154	ADIPOQ,APP,FOS,LEP,LGALS12
ANGPTL4	-0.912	other				0.00155	AGPAT2,DGAT2,FASN
CAMKK2	-0.303	kinase				0.00155	CDKN1A,FASN,LEP
CNB-001		chemical reagent				0.00155	ASNS,ATF3,SLC7A11
DBI	-2.295	other				0.00155	ACSS2,FASN,PPARG
DRD1		g-protein coupled receptor				0.00155	EGR1,FOS,HOMER1
ELK3	0.053	transcription regulator				0.00155	EGR1,FOS,SERPINE1
JMJD1C	0.37	enzyme				0.00155	CDKN1A,EGR1,NOG
NR1D2	0.438	ligand-dependent nuclear receptor				0.00155	FABP4,FGF21,MSTN
PCBP2	0.066	other				0.00155	CCN1,CCN2,CEBPA
RLIM	0.1	enzyme				0.00155	CCN2,CDKN1A,SERPINE1
Shc		group				0.00155	FABP4,FOS,PPARG
T 0070907		chemical reagent				0.00155	ADIPOQ,CDKN1A,CEBPA
TLE1	-0.228	transcription regulator				0.00155	ATF3,EGR1,FOS
TOP1	-0.273	enzyme				0.00155	ASNS,CDKN1A,HIF1A
WNT10B	-0.739	other				0.00155	CEBPA,FABP4,PPARG
hexarelin		chemical toxicant				0.00155	LIPE,PPARG,SLC27A1
orotic acid		chemical - endogenous mammalian				0.00155	CYP2E1,FASN,SCD
tiron		chemical reagent				0.00155	CDKN1A,PLAUR,TNC
triptorelin		biologic drug				0.00155	FOS,JUN,NOS1
CDX2		transcription regulator		1.457	1.475	0.00155	CDKN1A,DHRS9,DLL1,FGF1,Gkn3,HOXA5,JUN,SOX17,SOX9,TAC1
alitretinoin		chemical drug		-1.615	-1.581	0.00155	APP,CDKN1A,DHRS9,FABP4,FASN,FOS,PPARG,SCD,SLC27A1,SPP1
Histone h3		group				0.00156	ADCY5,ADIPOQ,ATF3,CDKN1A,CEBPA,DIO1,EGR1,FABP4,FASN,FOS,HOXA5,Ifi27l2a/Ifi27l2b,JUN,KLK3,MGLL,NOG,PPARG,RETN,SCD,SOX17,SPP1
captopril		chemical drug		1.195	1.207	0.00162	ASNS,CYP2E1,EPHX2,FCGR2A,LTBP2,SPP1,TSPAN8
PPARD	0.142	ligand-dependent nuclear receptor		-1.058	-1.027	0.00163	AQP7,FABP4,FASN,LIPE,LIPG,PNPLA2,PPARG,SCD,SLC22A3,SLC27A1,STBD1,TNFRSF11B,TRIM63
STAT6	-0.101	transcription regulator	Activated	2.518	2.528	0.00166	Cd1d2,CDKN1A,CIDEC,EGR1,EGR2,FABP4,FASN,FCGR2A,FGF21,GBP6,LIPE,MMP2,PDGFC,PNPLA2,PRNP,SERPINE1,SOX13,Tgtp1/Tgtp2,Trim30a/Trim30d	Ap1,CTNNB1,ELK1,ERK,FOXO3,NFkB (complex),SMAD3,SP1,STAT6
methylprednisolone		chemical drug		1.736	1.758	0.00167	ARSB,ASNS,CCN2,CDKN1A,DHRS9,DIO1,EPHX2,FABP5,FCGR2A,FOS,GADD45A,GPT,HNMT,IGFALS,JUN,PC,PLAAT3,PLAUR,SERPINA3,SERPINE1,SLC25A10,Sult1a1,TINAGL1
APP	1.181	other		0.94	0.98	0.0017	Ank2,APP,CALML4,CCN2,CLDN5,CYP26B1,DBI,EGR1,FCGR2A,FOS,GBP6,GDF15,H19,H4C9,HCAR2,HOMER1,ICAM2,JUN,KCNC4,KLK3,LRP6,MMP2,NNAT,NOG,NOS1,PPARG,PRNP,SERPINE1,SLC7A11,SOX9,Tgtp1/Tgtp2,TRIB3,TUBA1B,VCAN
nitric oxide		chemical - endogenous mammalian	Activated	2.401	2.43	0.00174	APP,ATF3,CCN2,CDKN1A,EGR1,FOS,GADD45A,JUN,MMP2,SPP1	AGT,ATF4,Ap1,CTNNB1,EGR1,ELK1,ERK,ERK1/2,FOXO3,HIF1A,IL1A,IL6,Jnk,NFkB (complex),SMAD1,SMAD3,SMAD4,SP1,SREBF1,STAT6,hydrogen peroxide,nitric oxide
NR1D1	-0.102	ligand-dependent nuclear receptor		-1.076	-1.076	0.00175	EGR1,FASN,FGF21,FOS,KLB
MMP9	0.791	peptidase		0.511	0.529	0.00176	CDKN1A,CLDN5,FOS,GADD45A,MMP2,MSTN,SERPINE2
dinoprost		chemical - endogenous mammalian	Activated	2.607	2.627	0.00176	Acan,FABP4,FOS,JUN,PTGFR,SPP1,THRSP	Ap1,CTNNB1,EGR1,ELK1,ERK1/2,HIF1A,NFkB (complex),SMAD1,SMAD3,SP1,dinoprost
10-decarbamoylmitomycin C		chemical toxicant				0.00178	CDKN1A,GADD45A
2-amino-3-phosphonopropionic acid		chemical - endogenous mammalian				0.00178	EGR1,FOS
AMELX		growth factor				0.00178	COL2A1,SOX9
AMOT	0.961	other				0.00178	CCN1,CCN2
AMOTL1	-0.034	other				0.00178	CCN1,CCN2
AMOTL2	0.027	other				0.00178	CCN1,CCN2
AP2A1	0.266	transporter				0.00178	APP,CEBPA
ASPN	1.467	other				0.00178	Acan,COL2A1
CSNK1E	-0.168	kinase				0.00178	APP,SERPINE1
E64		chemical - endogenous non-mammalian				0.00178	APP,MMP2
ELL	-0.49	transcription regulator				0.00178	CDKN1A,FOS
ELOA	0.151	transcription regulator				0.00178	ATF3,CDKN1A
ELOVL2		enzyme				0.00178	FASN,SCD
Fascin		group				0.00178	CCN1,CCN2
G protein beta gamma		complex				0.00178	CCN1,CCN2
GFRA2	-0.594	transmembrane receptor				0.00178	EGR1,EGR2
GIPC1	-0.136	other				0.00178	PROX1,SERPINE1
GNG2	-0.182	enzyme				0.00178	F2R,MYH11
Ggtase I		complex				0.00178	CCN1,CCN2
HU-210		chemical reagent				0.00178	FASN,NOS1
Igf		group				0.00178	HIF1A,MYOG
MYH11	-1.65	other				0.00178	CNN1,MYH11
MitoBloCK-6		chemical drug				0.00178	ASNS,PCK2
OXGR1		g-protein coupled receptor				0.00178	LIPE,PNPLA2
PLAAT3	-2.426	enzyme				0.00178	GPT,LEP
PMEPA1	0.217	other				0.00178	CDKN1A,KLK3
RAB11FIP3	0.288	other				0.00178	FOS,JUN
RING1	-0.339	transcription regulator				0.00178	FOS,JUN
SLC27A1	-2.324	transporter				0.00178	CEBPA,PPARG
SLC27A4	0.007	transporter				0.00178	CEBPA,PPARG
STRAP	0.271	other				0.00178	JUN,SERPINE1
TFIIH		complex				0.00178	CDKN1A,PPARG
TTI-101		chemical drug				0.00178	HIF1A,SERPINE1
YAP/TAZ		group				0.00178	CCN1,CCN2
ZHX2	0.022	transcription regulator				0.00178	Mup1 (includes others),MYH11
ZNF451	0.247	enzyme				0.00178	CDKN1A,SERPINE1
acetoacetic acid		chemical - endogenous mammalian				0.00178	CYP2E1,FGF21
bisindolylmaleimide II		chemical - kinase inhibitor				0.00178	JUN,PPARG
cromakalim		chemical drug				0.00178	AGTR2,FOS
cycloserine		chemical drug				0.00178	FOS,HOMER1
elcatonin		biologic drug				0.00178	MMP2,TNFRSF11B
gliquidone		chemical drug				0.00178	ADIPOQ,FABP4
hoechst 33342		chemical reagent				0.00178	FOS,SOX17
potassium channel		group				0.00178	FOS,JUN
riociguat		chemical drug				0.00178	SERPINE1,SPP1
tolylfluanid		chemical toxicant				0.00178	FASN,SCD
yohimbine		chemical drug				0.00178	EGR1,FOS
GHRH		other		0	0.024	0.00185	FOS,LEP,MYOG,TRIM63
KN-62		chemical - kinase inhibitor		-1	-1.039	0.00185	ATF3,EGR1,MYOG,PPARG
LRPAP1	0.158	other		1.067	1.081	0.00185	APP,MMP2,SERPINA3,SERPINE1
PDGF-AA		complex				0.00185	CDKN1A,EREG,FOS,HBEGF
ZC3H12A	-0.756	enzyme		-1.966	-1.979	0.00185	ADIPOQ,CEBPA,FABP4,PPARG
carbenoxolone		chemical toxicant	Activated	2	1.984	0.00185	CCN2,FASN,NOX4,SPP1
diazoxide		chemical drug		-0.218	-0.237	0.00185	ADRB3,EGR1,FASN,LEP
miR-18a-5p (and other miRNAs w/seed AAGGUGC)		mature microrna		-0.849	-0.896	0.00185	CCN2,CDKN1A,HIF1A,HP
pregna-4,17-diene-3,16-dione		chemical - endogenous non-mammalian		0.48	0.442	0.00185	ADIPOQ,CEBPA,CES1,PPARG
MYD88	-0.283	other	Activated	2.058	2.129	0.00185	CCN1,CD274,EGR1,FOS,GDF15,HIF1A,HLA-A,HP,JUN,MMP2,SERPINE1,SLC16A3,SPP1	Ap1,CTNNB1,EGR1,ELK1,ERK,ERK1/2,FOXO3,HDAC6,HIF1A,IL6,Jnk,MAPK3,MYD88,NFkB (complex),PPARG,SMAD1,SMAD3,SMAD4,SP1,SREBF1,STAT6,TGFB1,TNF,ZFP36,nitric oxide
methotrexate		chemical drug		-0.905	-0.889	0.00185	ACSS2,Apoc3,C2,CDKN1A,CES1,DGAT2,DUSP14,FASN,HSD11B1,SCD,SPP1,TNFRSF11B,UGT1A6
tert-butyl-hydroquinone		chemical reagent		1.775	1.828	0.00191	ABCC1,ATF3,FOS,GADD45A,JUN,MYH11,SERPINE1
DMP1	1.034	other		0.514	0.493	0.00199	FGF1,LIPG,Mup1 (includes others),SLC6A9,SPP1
MEX3A	0.273	other	Activated	2.219	2.214	0.00199	AGPAT2,Apoc3,AQP7,CIDEC,PPARG
TFAP4	-0.336	transcription regulator		0.6	0.6	0.00199	CDKN1A,EGR1,FOS,GDF15,LGR5
methyl methanesulfonate		chemical toxicant	Activated	2.198	2.248	0.00199	ATF3,CDKN1A,EGR1,GADD45A,JUN	Ap1,CTNNB1,EGR1,HIF1A,Jnk,MAP2K4,NFkB (complex),SMAD3,SP1,methyl methanesulfonate
PTK2	-0.006	kinase		0.928	0.948	0.00202	CCN1,CDKN1A,FOS,MMP2,SPP1,TNC
Sn50 peptide		chemical toxicant		-1.732	-1.777	0.00202	CCN2,KCNC4,LIPG,MMP2,PPARG,SERPINE1
KLF4	0.236	transcription regulator		0.181	0.233	0.00206	APCDD1,CDKN1A,CEBPA,DLL1,FRZB,IRX3,LGR5,MYH11,PLAUR,SERPINE1,SLPI,SOX17,TF,TNC
1,10-phenanthroline		chemical toxicant				0.00209	CDKN1A,HIF1A,PRNP
AGO2	0.455	translation regulator				0.00209	APP,FOS,HIF1A
ELK4	-0.404	transcription regulator				0.00209	EGR1,EGR2,FOS
FABP2		transporter				0.00209	FASN,LEP,PPARG
Fe2+		chemical - endogenous mammalian				0.00209	APP,HIF1A,TF
NRG4	-2.503	growth factor				0.00209	CIDEC,FASN,SCD
PLCG1	-0.319	enzyme				0.00209	EGR1,FOS,SERPINE1
carbonyl cyanide p-(trifluoromethoxy)phenylhydrazone		chemical reagent				0.00209	ASNS,CHAC1,PCK2
pargyline		chemical drug				0.00209	CDKN1A,HIF1A,NOS1
putrescine		chemical - endogenous mammalian				0.00209	CDKN1A,FOS,JUN
cisplatin		chemical drug	Activated	2.596	2.635	0.0021	ASNS,ATF3,CCN2,CDKN1A,CDO1,CEBPA,CLIP4,EGR1,FABP4,FASN,FCGR2A,FOS,GADD45A,GDF15,HIF1A,JUN,KLK3,LGR5,LRP6,MMP2,NEO1,NOX4,RUNX1,SERPINE1,SPP1,TSPAN8,UGT1A6	Ap1,CTNNB1,EGR1,ELK1,ERK,ERK1/2,FOXO3,HIF1A,IL6,Jnk,MAP2K4,MAP3K1,NFkB (complex),PRKCD,SMAD1,SMAD3,SP1,SRC,SREBF1,STAT6,ZFP36,cisplatin
dimethyl sulfoxide		chemical drug		-0.552	-0.512	0.00211	AQP7,CA3,CYP2E1,FOS,FRZB,HEBP1,JUN,SLC36A2,TNFRSF11B
TAZ	-0.39	enzyme	Activated	2.396	2.435	0.00218	CCN1,CCN2,COL5A1,COL5A2,COX4I2,HIF1A,LUM,SERPINE1	TAZ,TEAD2,TEAD4
AZGP1		transporter		-1.067	-1.065	0.00219	EGR1,LIPE,PNPLA2,TRIM63
NTRK1		kinase				0.00219	CDKN1A,EGR1,FOS,GADD45A
PRKDC	-0.176	kinase				0.00219	CDKN1A,EGR2,FASN,KLK3
REN		peptidase				0.00219	CCN2,CYP2E1,FOS,NOX4
amino acids		chemical - endogenous mammalian		-1.956	-1.974	0.00219	ASNS,FOS,HIF1A,JUN
bufalin		chemical reagent		1	0.989	0.00219	EGR1,FOS,GJA5,MMP2
crizotinib		chemical drug		0.13	0.132	0.00219	CD274,COL5A2,SERPINE1,VCAN
dibutyl phthalate		chemical toxicant		1.962	1.978	0.00219	FOS,JUN,SERPINE1,SPP1
oleoyl-estrone		chemical drug	Activated	2	1.978	0.00219	FABP4,FASN,LIPE,SLC27A1
ATM	0.883	kinase		0.756	0.789	0.00222	CCN2,CDKN1A,GADD45A,JUN,LEP,SERPINE1
folic acid		chemical - endogenous mammalian		-0.765	-0.768	0.00222	ABCC1,APP,CDKN1A,JUN,MMP2,NOX4
ELAVL1	0.096	other		-0.358	-0.311	0.00222	ATF3,CDKN1A,CFD,FCGR2A,FOS,GBP6,Gvin1 (includes others),HLA-A,MYOG,SLC7A11,Tgtp1/Tgtp2
CCL2	-0.034	cytokine		-1.093	-1.061	0.00223	ADIPOQ,CEBPA,FABP4,FOS,MMP2,PPARG,SERPINE1
2-methoxyestradiol		chemical - endogenous mammalian		-0.106	-0.098	0.00224	ATF3,HIF1A,LOC102724788/PRODH,SERPINE2,SPON1
KAT2B	0.013	transcription regulator				0.00224	CCN2,CDKN1A,FASN,KLK3,THRSP
SKIL	1.108	transcription regulator		-0.2	-0.18	0.00224	CDH11,CDKN1A,MYOG,SERPINE1,SOX17
Smad2/3		group				0.00224	CNN1,RUNX1,SERPINE1,SOX17,TNC
TCF7		transcription regulator				0.00224	CEBPA,FOS,PPARG,SDC2,SPP1
CNR1	-0.819	g-protein coupled receptor		-1	-0.966	0.00228	ADIPOQ,ADRB3,APCDD1,ARTN,DLL1,ERRFI1,FASN,FOS,LEP,NOG
TLR2	0.658	transmembrane receptor		-1.609	-1.572	0.00241	APP,ATF3,CDKN1A,GADD45A,GPT,LEP,PTGFR,SCD,SLC7A11,TRIM63
CIP2A	0.634	other	Inhibited	-2.412	-2.433	0.00243	COL15A1,GADD45A,LUM,PLAUR,SERPINE2,SLC16A3
PKM	0.875	kinase		1.029	1.062	0.00243	EGR1,FASN,MMP2,PC,PCK2,SDC2
Raf		group		1.176	1.2	0.00243	CDKN1A,EGR1,FOS,GDF15,JUN,MYH11
gemfibrozil		chemical drug		0.896	0.928	0.00243	Apoc3,APP,GADD45A,PPARG,SCD,SERPINE1
INHA	-0.634	growth factor		0.726	0.726	0.00249	CCN1,CCN2,CNN1,CYP26B1,EREG,MMP2,MYH11,SERPINE1
ABCA1	-0.194	transporter		1.116	1.102	0.00252	ADIPOQ,APP,DGAT2,LEP,PPARG
D-galactosamine		chemical - endogenous mammalian		1.342	1.387	0.00252	CYP2E1,FOS,GDF15,GPT,JUN
HDAC6	-0.517	transcription regulator	Activated	2.219	2.233	0.00252	HIF1A,JUN,LTBP2,NOG,SERPINE1
PTGS1	-0.366	enzyme		-0.762	-0.747	0.00252	ATF3,FABP4,GEM,MMP2,PTGER3
TXNIP	0.168	other		1.432	1.426	0.00252	CDKN1A,FASN,FGF21,NOX4,THRSP
cytochalasin D		chemical toxicant		-0.535	-0.564	0.00252	Acan,CCN2,COL2A1,FOS,MMP2
methimazole		chemical drug		1.987	1.975	0.00252	DIO1,JUN,KLK3,Mup1 (includes others),THRSP
IFT88	0.219	other	Inhibited	-2	-2.01	0.00258	ADIPOQ,CEBPA,FABP4,PPARG
MAP2K2	-0.139	kinase				0.00258	ALDH1L1,CDKN1A,FOS,HIF1A
HDAC5	-0.413	transcription regulator		-0.277	-0.272	0.0026	CDKN1A,EGR2,FGF21,JUN,MYOG,PPARG,SCD
PI3K (family)		group		0.34	0.374	0.00266	CD274,FASN,FOS,HIF1A,LEP,MMP2,SERPINE1,TNC
Rxr		group				0.00266	CDKN1A,DIO1,GADD45A,HBEGF,LEP,MMP2,PPARG,SPP1
ADAM17	0.582	peptidase				0.00266	LRG1,MMP2,PRNP,SOX9,TF,TNFRSF11B
ETS2	-0.38	transcription regulator		0.896	0.948	0.00266	CDKN1A,FGF1,FOS,JUN,PLAAT3,SPP1
HES1	-0.476	transcription regulator		1.26	1.229	0.00266	CDKN1A,CEBPA,CFD,DLL1,PPARG,SPP1
ITGB3	0.776	transmembrane receptor		0.429	0.449	0.00266	CD274,FOS,MMP2,PLAUR,RUNX1,SERPINE1
LGALS1	-0.756	other		0.128	0.16	0.00266	CDKN1A,GPAT3,HBEGF,LEP,MMP2,SERPINE1
miR-17-5p (and other miRNAs w/seed AAAGUGC)		mature microrna		-1.844	-1.899	0.00266	APP,CDKN1A,EGR2,ITGB8,PPARG,RUNX1
CDH2	0.007	other				0.00274	CDKN1A,KCNA5,MYOG
Collagen Alpha1		group				0.00274	CDKN1A,MMP2,PLAUR
DOCK2	0.413	other				0.00274	ADIPOQ,LEP,LIPE
GAL		other				0.00274	CDKN1A,FOS,LEP
L-histidine		chemical - endogenous mammalian				0.00274	ASNS,ATF3,EGR1
MEG3		other				0.00274	GDF15,HIF1A,JUN
PPP5C	-0.017	phosphatase				0.00274	CDKN1A,FABP4,PLIN1
SMURF2	0.189	enzyme				0.00274	CCN2,JUN,SERPINE1
SOX5	0.627	transcription regulator				0.00274	Acan,COL2A1,LIPE
cyclic GMP		chemical - endogenous mammalian				0.00274	CDKN1A,FOS,SERPINE1
cytochalasin B		chemical toxicant				0.00274	CDKN1A,MMP2,PTTG1
gamma-linolenic acid		chemical - endogenous mammalian				0.00274	FASN,PLIN4,THRSP
spermidine		chemical - endogenous mammalian				0.00274	CDKN1A,FOS,MMP2
miR-29b-3p (and other miRNAs w/seed AGCACCA)		mature microrna		-1.941	-2.004	0.00281	COL15A1,COL5A1,COL5A2,CRTAP,FBN1,PLOD2,VCAN
KLF2	-0.127	transcription regulator		-0.036	-0.047	0.00281	CCN2,CDKN1A,CEBPA,DLL1,FABP4,GADD45A,HIF1A,PLOD2,PPARG,SERPINE1,SOX9
topotecan		chemical drug		0	-0.027	0.00281	ATF3,CDKN1A,EGR1,GDF15,HIF1A,NNAT,PRKAR2B,PRNP,PTPRT,ROBO2,TST
EBF1	-0.978	transcription regulator				0.00282	ADIPOQ,FASN,LIPE,PCK2,PHKA2,PPARG,PRKAR2B,RASGRF2,SCD
ARNTL	0.395	transcription regulator		-1.546	-1.515	0.00283	CEBPA,FASN,GPT,HIF1A,SCD
DGCR8	0.043	enzyme		-0.492	-0.498	0.00283	CNN1,EGR1,EGR2,FOS,TNC
SATB2	1.217	transcription regulator		-0.13	-0.127	0.00283	ESAM,FABP4,NOX4,SDC2,SPP1
mir-30		microrna		-0.99	-1.037	0.00283	CCN2,CDKN1A,GADD45A,NEDD4L,SERPINE1
omeprazole		chemical drug				0.00283	CCN2,CDKN1A,CNN1,EGR1,FOS
quinolinic acid		chemical - endogenous mammalian		1.178	1.191	0.00283	EGR1,FOS,GFRA1,JUN,TAC1
NR5A2	-1.63	ligand-dependent nuclear receptor		1.121	1.152	0.00283	CDKN1A,CFD,FASN,FOS,HP,JUN,KLK3,RBPJL
SPARC	-0.213	other		-0.493	-0.506	0.00283	CFD,CIDEC,MCM6,MMP2,SERPINE1,SLC7A11,SOX9,TRIM5
Salmonella enterica serotype abortus equi lipopolysaccharide		chemical toxicant		0.392	0.468	0.00295	ASNS,CD274,EGR1,EREG,FFAR2,GADD45A,GEM,HOMER1,MGLL,NEDD4L
benzo(a)pyrene		chemical toxicant		0.053	0.084	0.00297	CCN1,CDKN1A,EREG,FASN,FOS,HP,JUN,PON1,SERPINE1,SLC1A4,TF,UGT1A6
HNRNPA2B1	-0.009	other				0.00298	ARSJ,CIDEC,GDF15,H19,HNMT,MMD,PDGFC,PLOD2,VCAN
FABP4	-2.946	transporter		1	1.012	0.00301	FABP4,FABP5,LIPE,PPARG
GAB2	-0.104	other				0.00301	APP,FOS,HIF1A,SERPINE1
MYOG	4.263	transcription regulator				0.00301	CDKN1A,FOS,MYOG,TRIM63
vinblastine		chemical drug		0.949	0.986	0.00301	CDKN1A,FOS,HIF1A,HLA-A
DDIT3	0.607	transcription regulator		1.601	1.613	0.00302	ASNS,ATF3,CA6,CEBPA,ERO1A,PCK2,PPARG,TRIB3
LCN2	-0.285	transporter		-0.022	0.001	0.00302	FASN,HIF1A,MMP2,SCD,SPP1,TINAGL1,TNFRSF11B
PIK3R1	-0.979	kinase		0.816	0.85	0.00302	FOS,HIF1A,MAFA,MMP2,PPARG,SERPINE1,TRIB3
amphetamine		chemical drug		1.896	1.928	0.00302	ATF3,EGR1,FOS,JUN,NOS1,RGS9,TAC1
ADRA1D	-0.617	g-protein coupled receptor				0.00315	EGR1,EGR2,FABP5,FOS,JUN
APLN	0.132	other		-1.411	-1.384	0.00315	ADIPOQ,CCN2,EGR1,FOS,SOX18
AVP	-2.322	other	Activated	2.176	2.208	0.00315	ATF3,EGR1,FOS,MYOG,NOS1
F3	0.571	transmembrane receptor	Activated	2.414	2.472	0.00317	CCN1,CCN2,EGR1,FOS,MMP2,SERPINE1	Ap1,CTNNB1,EGR1,ELK1,ERK1/2,F2,F2R,F3,F7,FOXO3,HIF1A,IL6,NFkB (complex),SMAD1,SMAD3,SP1,SREBF1,nitric oxide
GDNF		growth factor		1.614	1.637	0.00317	CLDN5,EGR1,EGR2,GFRA1,NNAT,TAC1
CSF2		cytokine		1.24	1.318	0.0032	CDKN1A,EGR1,EGR2,F2R,FFAR2,FOS,GDF15,HBEGF,HCAR2,HIF1A,JUN,LEP,MCM6,MMD,MMP2,PLAUR,PPARG,PRNP,SLC7A11,SPP1,TF
mir-8		microrna		0.672	0.617	0.00323	ATF3,CDKN1A,CRTAP,DUSP26,ERRFI1,HIF1A,HOXA5,PAK6,SERPINE2,SOX17,SOX9
Immunoglobulin		complex		0.013	0.019	0.00324	APP,CD274,CFD,COX4I2,CYP2E1,EGR1,EGR2,FASN,FCGR2A,FOS,HLA-A,ITGB8,LOC102724788/PRODH,MMP2,MOXD1,NOS1,PC,PCK2,PLIN4,SCD,SERPINA3,SPP1,Sult1a1,TIMP4,VCAN
okadaic acid		chemical toxicant	Activated	2.004	2.022	0.00324	APP,CCN2,EGR1,FOS,JUN,SPP1,THRSP	Ap1,CTNNB1,EGR1,ELK1,ERK,ERK1/2,FOXO3,HIF1A,Jnk,MAP2K1/2,MAP3K1,MAPK3,NFkB (complex),PPARG,PRKCB,SMAD1,SMAD3,SMAD4,SP1,STAT6,ZFP36,okadaic acid
LDL		complex		1.491	1.536	0.00328	ATF3,CCN2,CDKN1A,EGR1,EMB,FABP4,FOS,GJA5,HIF1A,JUN,MMP2,PPARG,SERPINE1
MED1	0.308	transcription regulator	Inhibited	-2.037	-1.988	0.00343	ADIPOQ,CDKN1A,CEBPA,CFD,DIO1,FABP4,FASN,GADD45A,KLK3,PPARG	CTNNB1,MED1,PPARG,SREBF1
PRKCD	-0.273	kinase	Activated	2.347	2.391	0.00343	CDKN1A,FBN1,FOS,GDF15,GEM,JUN,LIPG,MMP2,SERPINE1,TNFRSF11B	Ap1,CTNNB1,EGR1,ELK1,ERK,ERK1/2,FOXO3,HIF1A,Jnk,NFkB (complex),PRKCD,SMAD1,SMAD3,SP1,SRC,STAT6,nitric oxide
cyclophosphamide		chemical drug	Activated	2.367	2.4	0.00346	ATF3,FCGR2A,FOS,SOX9,SPP1,TSPAN8
POMC	-0.147	other		1.065	1.088	0.00348	FOS,H19,JUN,LEP,NOS1,SDC2,SLC9A3R2
4-(2-aminoethyl)benzenesulfonylfluoride		chemical - protease inhibitor		0.152	0.116	0.00349	ACSS2,CDKN1A,TNC,TNN
AMH		growth factor	Activated	2	2.017	0.00349	CDKN1A,KLK3,MMP2,SMAD9
PTCH1	0.318	transmembrane receptor		-1.067	-1.095	0.00349	COL2A1,DLL1,GADD45A,SOX9
apomorphine		chemical drug		1.928	1.935	0.00349	EGR1,FOS,HOMER1,TAC1
crocidolite asbestos		chemical toxicant		1.969	2.016	0.00349	FOS,GADD45A,JUN,SPP1
3-nitrotyrosine		chemical reagent				0.00349	MYH8,MYOG
AD-5057		chemical drug				0.00349	FABP4,HSD11B1
CALCR		g-protein coupled receptor				0.00349	CDKN1A,FOS
CCKAR		g-protein coupled receptor				0.00349	EGR1,LEP
CELA2A		peptidase				0.00349	CDKN1A,SLPI
COL1A2	0.385	other				0.00349	CDKN1A,SERPINE1
CTH	1.167	enzyme				0.00349	ASNS,CDKN1A
DRD3		g-protein coupled receptor				0.00349	FOS,LEP
ENPP1	1.142	enzyme				0.00349	LEP,SPP1
Fructus xanthii aqueous extract		chemical - endogenous non-mammalian				0.00349	FASN,SCD
GCLC	0.361	enzyme				0.00349	FOS,JUN
GPR39		g-protein coupled receptor				0.00349	LIPE,PNPLA2
Gpcr		group				0.00349	FOS,JUN
ITPRID2	-0.462	other				0.00349	ADIPOQ,LEP
KCNJ2	0.685	ion channel				0.00349	FOS,MYOG
KIDINS220	0.341	transcription regulator				0.00349	EGR1,FOS
LRRC8C	-0.128	ion channel				0.00349	FABP4,PPARG
MME	-0.624	peptidase				0.00349	APP,TAC1
NEK2	0.006	kinase				0.00349	CDKN1A,GADD45A
PON3	-0.185	enzyme				0.00349	GPT,LEP
PTGIS	0.047	enzyme				0.00349	CYP2E1,NOS1
RNF187	-0.144	enzyme				0.00349	HBEGF,JUN
SNX27	0.366	other				0.00349	APP,PPARG
SOAT1	1.029	enzyme				0.00349	APP,FASN
Sapk		group				0.00349	FOS,GADD45A
TR-RXR		complex				0.00349	DIO1,THRSP
actinonin		chemical reagent				0.00349	ASNS,CHAC1
apamin		chemical toxicant				0.00349	FOS,JUN
atipamezole		chemical drug				0.00349	EGR1,FOS
benidipine		chemical drug				0.00349	CDKN1A,MYH11
carboxyamido-triazole		chemical drug				0.00349	FOS,MMP2
catechol		chemical - endogenous mammalian				0.00349	FOS,JUN
danusertib		chemical drug				0.00349	CDKN1A,GADD45A
gabapentin		chemical drug				0.00349	FOS,NOS1
ginsenoside Re		chemical drug				0.00349	ADIPOQ,FABP4
ibotenic acid		chemical toxicant				0.00349	FOS,JUN
phenylacetic acid		chemical - endogenous mammalian				0.00349	HLA-A,MMP2
prednisone		chemical drug				0.00349	CDH11,KLK3
sertindole		chemical drug				0.00349	APP,HOMER1
sitagliptin		chemical drug				0.00349	CCN2,FABP4
tetrahydrocurcumin		chemical - endogenous mammalian				0.00349	APP,CDKN1A
tirapazamine		chemical drug				0.00349	CDKN1A,SPP1
vinyl carbamate		chemical toxicant				0.00349	CDKN1A,GPT
7-ketocholesterol		chemical - endogenous mammalian				0.0035	EGR1,NOX4,PON1
ACE2		peptidase				0.0035	CCN2,NOS1,SERPINE1
ASIP		other				0.0035	CNTFR,MCM6,SOX9
CBX2	-0.027	transcription regulator				0.0035	CDKN1A,RUNX1,SOX9
CMKLR1	-0.596	g-protein coupled receptor				0.0035	ADIPOQ,LIPE,PLIN1
DAXX	-0.295	transcription regulator				0.0035	CDKN1A,KLK3,SERPINE1
GABBR1	-0.052	g-protein coupled receptor				0.0035	Acan,COL2A1,SPP1
HOXA4	-0.349	transcription regulator				0.0035	CCN1,CCN2,MYH11
NDN	0.03	transcription regulator				0.0035	CDKN1A,MYOG,PPARG
NTF4		growth factor				0.0035	FOS,SPP1,TAC1
RALA	-0.102	enzyme				0.0035	CDKN1A,MMP2,PLAUR
buthionine sulfoximine		chemical drug				0.0035	CD274,FOS,HBEGF
fibric acid derivative		chemical drug				0.0035	FASN,SCD,SLC27A1
methylphenidate		chemical drug				0.0035	EGR1,FOS,HOMER1
perindopril		chemical drug				0.0035	CCN2,RETN,TRIM63
silicon dioxide		chemical drug				0.0035	EGR1,FOS,JUN
sorbitol		chemical - endogenous mammalian				0.0035	CCN1,CCN2,ERRFI1
STK40	0.007	kinase				0.00351	CEBPA,FABP4,FGF1,MYH8,PPARG
FSH		complex		0.068	0.092	0.00358	ADCY7,CARD10,CCN2,COL15A1,DUSP14,EREG,FOS,GEM,HSD11B1,JUN,MMP2,NEO1,PHKA2,PRNP,SERPINE1,TF,TNFRSF11B
RET	-0.311	kinase				0.00363	CLDN5,EGR1,FOS,KLK3,NOS1,PLAUR,PLOD2,PRNP
DMD	0.541	other		1	1.02	0.00366	CDKN1A,CLIP4,GJA5,H19,IP6K3,KCNK3,MSTN,Mup1 (includes others),MYH8,NOG,NOS1,PROX1
FGF8		growth factor		0	0.019	0.00373	ERRFI1,GPR4,NOG,RASD1,SLPI,SPP1,TNFRSF11B
SMAD2	0.004	transcription regulator		1.225	1.249	0.00373	Acan,CCN2,CDKN1A,CES1,COL2A1,MMP2,SERPINE1
GNA14	-1.708	enzyme				0.00376	ATF3,CNN1,GADD45A,GJA4,HBEGF,PLAUR
PLAU	-0.356	peptidase		0.186	0.209	0.00376	CCN1,GDF15,PLAUR,PON1,SERPINE1,SLPI
phenobarbital		chemical drug		-0.946	-0.907	0.00376	CDKN1A,CYP4B1,DIO1,GPT,Sult1a1,THRSP
MIF	0.139	cytokine	Activated	2.017	2.056	0.00385	DGAT2,F2R,FASN,FOS,HIF1A,JUN,MMP2,RETN	Ap1,CTNNB1,EGF,EGR1,ELK1,FOXO3,HIF1A,HRAS,MIF,NFkB (complex),SMAD3,SMAD4,SP1,SRC,SREBF1
PTP4A1	-0.258	phosphatase		1.134	1.15	0.00385	COL15A1,COL5A1,FASN,HIF1A,ITGB8,MMP2,SPINT2,VCAN
MTORC1		complex		1.288	1.333	0.00389	FASN,FGF21,HIF1A,NOX4,SCD
SMAD1	0.237	transcription regulator	Activated	2.2	2.242	0.00389	CCN2,CDKN1A,COL2A1,SOX9,SPP1	Ap1,EGR1,ELK1,SMAD1,SMAD3,SMAD4,SP1
triadimefon		chemical toxicant		1	1.028	0.00389	CES1,Gstt1,SLC3A2,TST,UGT1A6
NR1H3	-1.866	ligand-dependent nuclear receptor		-1.312	-1.303	0.00396	ADRB3,Apoc1,ATF3,CD274,CDKN1A,DHRS9,FASN,GPT,HSD11B1,PPARG,SCD,VCAN
melatonin		chemical - endogenous mammalian		0.816	0.816	0.004	CDKN1A,FASN,FOS,HIF1A,LEP,SOX9,SPP1
4-hydroxynonenal		chemical toxicant				0.00402	APP,CCN2,JUN,SERPINE1
APOB		transporter				0.00402	FABP4,FASN,PPARG,SCD
GTF2B	-0.028	transcription regulator				0.00402	ASNS,CDKN1A,DIO1,PPARG
ITCH	0.285	enzyme	Inhibited	-2	-2.048	0.00402	CCN1,CCN2,FOS,MCM6
PLAT	0.724	peptidase				0.00402	FOS,JUN,MMP2,SERPINE1
PML-RARA		fusion gene/product				0.00402	CDKN1A,EGR1,FOS,JUN
SIAH2	0.466	transcription regulator				0.00402	DBI,FGF1,HIF1A,KLK3
TCF7L1	-0.905	transcription regulator		-1.067	-1.098	0.00402	ATF3,JUN,PPARG,SOX17
taurine		chemical - endogenous mammalian	Inhibited	-2	-1.996	0.00402	ADIPOQ,CDO1,CEBPA,MMP2
ascorbic acid		chemical - endogenous mammalian		0.575	0.579	0.00407	Acan,CDKN1A,HIF1A,SERPINE1,SPP1,TNFRSF11B
GNA15	-0.021	enzyme				0.00408	CDO1,FMO1,GADD45A,MYH11,NOX4,SERPINA3,TRIB3,VCAN
staurosporine		chemical - kinase inhibitor		0.063	0.055	0.00408	APP,CDKN1A,CYP2E1,FCGR2A,FOS,H19,SERPINA3,SERPINE1
SOX2	0.485	transcription regulator		-0.202	-0.174	0.00409	APCDD1,ATF3,CCN2,CDKN1A,COL9A3,DLL1,FOS,FRZB,H19,IRX3,JUN,NFASC,NOG,PLAAT3,PPARG,SERPINE1,SOX13,SOX17,TF,VCAN
aspirin		chemical drug		-0.563	-0.608	0.00415	APP,CDKN1A,FBN1,GDF15,HBEGF,MMP2,NOX4,PON1,PTGER3,RASGRF2
ADRA1A	-2.077	g-protein coupled receptor				0.00431	EGR1,EGR2,FABP5,FOS,JUN
Hedgehog		group				0.00431	HOXA5,KLK3,MAFA,SOX9,SPP1
HMOX1	0.677	enzyme		-0.788	-0.797	0.00433	ADIPOQ,CD274,CDKN1A,CYP2E1,FGF1,FOS,GPT,MYOG
1-(carboxymethylthio)tetradecane		chemical drug				0.00437	Apoc3,SCD,SLC27A1
CCND3	-0.3	kinase				0.00437	CEBPA,FABP4,KLK3
KISS1R	-0.12	g-protein coupled receptor				0.00437	FOS,HHIP,LEP
N-ethyl-N-nitrosourea		chemical toxicant				0.00437	CDKN1A,CYP2E1,SPP1
PNN	-0.049	other				0.00437	CDKN1A,GDF15,JUN
calcipotriene		chemical drug				0.00437	FOS,JUN,SPP1
fluoride		chemical - endogenous mammalian				0.00437	CA6,FOS,GADD45A
glutamyl-Se-methylselenocysteine		chemical - endogenous mammalian				0.00437	EGR1,JUN,PLAUR
glycerol		chemical - endogenous mammalian				0.00437	ADIPOQ,FABP4,PPARG
GATA4		transcription regulator		-0.808	-0.795	0.00438	CCBE1,CCN2,FOS,GJA5,JUN,KCNA5,LRRFIP1,LTBP2,MYOG,SOX9,SPP1
linoleic acid		chemical - endogenous mammalian		-1.06	-1.037	0.00441	APP,FABP4,FASN,NEDD4L,PLIN4,SCD
lithium		chemical drug		-0.218	-0.213	0.00441	APP,CDKN1A,EGR1,FOS,JUN,TAC1
WT1		transcription regulator		0.922	0.935	0.00446	ASNS,CCN2,CDKN1A,EGR1,EREG,FGF1,HBEGF,MMP2,PCK2,PLAUR,SERPINE1,SOX9
ANXA2	0.056	other				0.0046	CDKN1A,GADD45A,JUN,MMP2
GAPDH	0.869	enzyme		-1	-1.021	0.0046	C2,GEM,KLK3,SPP1
HLX	-0.897	transcription regulator		-0.849	-0.872	0.0046	EGR1,GDF15,JUN,SEMA3G
KDM2B	0.541	enzyme		0.655	0.639	0.0046	CDKN1A,COL2A1,FOS,SOX17
MTDH	0.45	transcription regulator		1.213	1.205	0.0046	CDKN1A,DIO1,HIF1A,MMP2
S-adenosylmethionine		chemical - endogenous mammalian		1.091	1.071	0.0046	ADIPOQ,CYP2E1,FASN,FOS
dithiothreitol		chemical reagent				0.0046	ATF3,FGF21,GADD45A,HIF1A
irbesartan		chemical drug	Inhibited	-2	-2.033	0.0046	ADIPOQ,FOS,LEP,SERPINE1
ZMPSTE24	0.67	peptidase	Inhibited	-2.201	-2.228	0.00475	ATF3,CDKN1A,DIO1,GADD45A,IGFALS	CTNNB1,HIF1A,NFkB (complex),SMAD3,SP1,ZMPSTE24
sunitinib		chemical drug		-0.351	-0.369	0.00475	CCN2,CDKN1A,COL5A1,RUNX1,TNC
MYCN	-1.491	transcription regulator		-0.278	-0.262	0.00476	ABCC1,CCN2,CDH11,CDKN1A,COL5A2,FBN1,HLA-A,KLK3,MMP2,SDC2,SERPINE1,SOX17,TUBA1B
GATA6	-1.34	transcription regulator		0.806	0.807	0.00477	BCAM,CALML4,CDKN1A,LGR5,LRRFIP1,MYH11,RBPJL,SCD,SLPI,SOX17,THRSP
SIM1		transcription regulator		-1.212	-1.132	0.00482	AQP7,Cd1d2,DLL1,EGR1,FCGR2A,HLA-A,HOMER1,KLK3,LEP,LRRFIP1,Rpl29 (includes others),UGT1A6
GATA2	-1.291	transcription regulator		0.805	0.828	0.00485	CDKN1A,CEBPA,CES1,DLL1,F2R,FABP4,GFRA1,ICAM2,KLK3,MMP2,P2RX1,PPARG,RUNX1,SOX18,SUCNR1,UGT1A6,Wfdc21,ZNF365
APC	0.123	enzyme		0.277	0.251	0.00513	APCDD1,CDKN1A,DHRS9,HIF1A,LGR5,SOX9,SPP1,TNFRSF11B
MAP2K1/2		group	Activated	2.415	2.456	0.00515	ATF3,CCN2,EGR1,EGR2,FOS,JUN	Ap1,CTNNB1,EGR1,ELK1,ERK,ERK1/2,FOXO3,HIF1A,Jnk,MAP2K1/2,MAPK3,NFkB (complex),SMAD1,SMAD3,SMAD4,SP1,STAT6
Map3k7	0.208	kinase		1.664	1.708	0.00515	EGR2,FASN,H19,HBEGF,JUN,SCD
romidepsin		biologic drug				0.00515	CDKN1A,EGR1,FOS,HIF1A,JUN,PLAUR
E. coli serotype 0127B8 lipopolysaccharide		chemical - endogenous non-mammalian		-0.389	-0.362	0.00518	ADIPOQ,ALDH1L1,CCN2,EGR2,F2R,FGF1,GJA5,HCAR2,PCK2,SLC7A11,TNFRSF11B
CDK19	0.08	kinase	Inhibited	-2	-2.035	0.0052	ATF3,CDKN1A,GADD45A,HBEGF,JUN,SLC7A11,TRIB3
FGFR1	0.272	kinase		0.896	0.934	0.0052	Acan,CDKN1A,DLL1,FGF1,FOS,JUN,PLAUR
AKT2	-0.185	kinase		-1.067	-1.053	0.00522	CDKN1A,LEP,MYH11,MYOG,PPARG
IL2RG	-1.107	transmembrane receptor		1.446	1.434	0.00522	FOS,HLA-A,JUN,MFNG,NEDD4L
TEAD2	-0.66	transcription regulator	Activated	2	2.046	0.00522	CCN1,CCN2,COL5A2,MCM6,SDC2
CHADL	-0.097	other		0	-0.008	0.00523	CDKN1A,COL2A1,SOX9,STEAP4
ITGAV	1.05	transmembrane receptor		1.944	1.976	0.00523	CDKN1A,FOS,MMP2,SERPINE1
PRLR	-0.779	transmembrane receptor		-0.528	-0.5	0.00523	CDKN1A,CFD,FABP4,LEP
PTX3	0.489	other		-1	-1.032	0.00523	CCN2,EGR2,FOS,JUN
SLC16A2	0.794	transporter		1	0.986	0.00523	DIO1,HAPLN1,STAC2,THRSP
Stat3-Stat3		complex		0.849	0.896	0.00523	CDKN1A,HIF1A,JUN,SERPINA3
RELA	-0.094	transcription regulator		1.749	1.801	0.00525	APP,CCN2,CD274,CDKN1A,COL2A1,EGR1,FOS,GDF15,HIF1A,JUN,LGR5,LUM,PPARG,SERPINE2,SOX9,TAC1,TNFRSF11B
ALDH1A1	0.924	enzyme				0.00537	FABP4,FASN,PPARG
CDK5R1	-0.234	kinase				0.00537	FOS,MMP2,SERPINE1
FABP5	-2.121	transporter				0.00537	FABP4,LEP,PPARG
GIP		other				0.00537	ADIPOQ,FOS,SPP1
HSP90AB1	0.408	enzyme				0.00537	ABCC1,ATF3,HIF1A
IGFBP7	-0.692	transporter				0.00537	ASNS,CDKN1A,MMP2
MAPK10	1.276	kinase				0.00537	APP,FOS,JUN
MAPK8IP3	-0.407	other				0.00537	APP,JUN,TF
PLC		group				0.00537	FOS,LIPE,TNFRSF11B
PLIN1	-3.857	other				0.00537	CIDEC,FASN,LEP
SP100		transcription regulator				0.00537	CCN2,CDKN1A,FOS
SP2	0.071	transcription regulator				0.00537	CDKN1A,FOS,SERPINE1
STK3	0.172	kinase				0.00537	CCN2,GPT,SPP1
TACR1	0.239	g-protein coupled receptor				0.00537	FOS,LEP,TAC1
UCP2	-0.145	transporter				0.00537	ADIPOQ,FASN,SCD
cerulenin		chemical drug				0.00537	CDKN1A,FASN,PPARG
diallyl trisulfide		chemical - endogenous non-mammalian				0.00537	CDKN1A,FOS,JUN
diethylmaleate		chemical toxicant				0.00537	CDKN1A,SLC3A2,SLC7A11
isoliquiritigenin		chemical - endogenous non-mammalian				0.00537	CCN2,CDKN1A,MMP2
CD24		other				0.00554	ATF3,CDKN1A,CHAC1,FOS,GDF15,JUN,TIMP4
histamine		chemical - endogenous mammalian	Activated	2.144	2.174	0.00555	FOS,GDF15,HBEGF,HIF1A,JUN,LEP	ATF4,Ap1,CTNNB1,ELK1,ERK,FOXO3,NFkB (complex),PRKCD,SMAD3,SP1,STAT6,histamine,hydrogen peroxide
DETA-NONOate		chemical reagent		1.503	1.513	0.00573	CDKN1A,FOS,HIF1A,SERPINE1,TNFRSF11B
PNPLA2	-2.973	enzyme		-1.432	-1.406	0.00573	FASN,FGF21,LEP,PPARG,TRIM63
TBP	0.056	transcription regulator				0.00573	ASNS,CDKN1A,FOS,HLA-A,PPARG
(+)-fluprostenol		chemical drug				0.00573	FABP4,PPARG
ADRA1		group				0.00573	EGR1,FOS
ANGPTL8	-2.618	other				0.00573	ACSS2,SCD
BANCR		other				0.00573	CDKN1A,MMP2
BRCA2	0.206	transcription regulator				0.00573	CDKN1A,SERPINE1
CCAR1	-0.299	transcription regulator				0.00573	CEBPA,PPARG
CLTC	0.459	other				0.00573	CDKN1A,HLA-A
DGAT2	-2.951	enzyme				0.00573	DGAT2,SCD
F2RL3	-2.051	g-protein coupled receptor				0.00573	EGR1,FOS
FA2H	-0.597	enzyme				0.00573	FASN,SCD
HP	-4.767	peptidase				0.00573	ADIPOQ,Orm1 (includes others)
MAGED1	0.116	transcription regulator				0.00573	CDKN1A,JUN
MCAM	-2.229	other				0.00573	ATF3,MMP2
MIR4269		microrna				0.00573	CCN1,CCN2
P2RY1	1.076	g-protein coupled receptor				0.00573	FOS,LEP
PIP5K1C	0.149	kinase				0.00573	CD274,ERRFI1
PMCH		other				0.00573	LEP,SCD
PTPRR	-0.514	phosphatase				0.00573	FOS,JUN
RAB7A	0.205	enzyme				0.00573	EGR1,FOS
RHOC	-0.023	enzyme				0.00573	ATF3,CDKN1A
SEMA3F	-0.813	other				0.00573	HIF1A,MMP2
SERCA		group				0.00573	EGR1,JUN
SMARCD1	-0.326	transcription regulator				0.00573	CDKN1A,KLK3
WRN	-0.189	enzyme				0.00573	CDKN1A,HIF1A
XCT790		chemical reagent				0.00573	CDKN1A,SOX9
YOD1	-0.294	enzyme				0.00573	CCN1,CCN2
butylated hydroxytoluene		chemical toxicant				0.00573	FOS,JUN
edelfosine		chemical drug				0.00573	ATF3,KLK3
histidinol		chemical - endogenous mammalian				0.00573	ASNS,EGR1
juglone		chemical toxicant				0.00573	EGR1,FASN
manidipine		chemical drug				0.00573	FOS,JUN
nicotinic acetylcholine receptor		complex				0.00573	FOS,JUN
quisqualic acid		chemical - endogenous non-mammalian				0.00573	EGR1,FOS
sGC		complex				0.00573	EGR1,FOS
HEY2	-1.092	transcription regulator		1.452	1.42	0.00592	CNN1,GJA5,MYH11,PROX1
SU6656		chemical toxicant				0.00592	ATF3,CCN2,EGR1,TNFRSF11B
VTN	-1.355	other		0.293	0.314	0.00592	CDKN1A,MMP2,PLAUR,SERPINE1
choline		chemical - endogenous mammalian		-0.762	-0.784	0.00592	CDKN1A,CYP2E1,ERRFI1,SPP1
GCG		other		0.934	0.964	0.00597	ADIPOQ,ADRB3,CCN2,FASN,FOS,Pde4d
apigenin		chemical - endogenous non-mammalian		0.327	0.289	0.00597	CDKN1A,DGAT2,FOS,HIF1A,KLK3,SLC27A1
fingolimod		chemical drug		0.152	0.122	0.00597	ADIPOQ,CCN2,CD274,CDKN1A,LIPE,SERPINE1
metribolone		chemical reagent		0.231	0.303	0.00602	ACSS2,APP,CDKN1A,EGR1,ERO1A,ERRFI1,FASN,FOS,GDF15,HOMER1,KLK3,MGLL,MMP2,NEDD4L,SLC16A3,SLC1A4,SLC25A10,VCAN
rifampin		chemical drug		0.447	0.482	0.00604	ABCC1,CES1,CYP2E1,CYP4B1,PCK2,SPP1,TNFRSF11B,UGT1A6
olanzapine		chemical drug		1.029	1.047	0.00626	ATF3,FOS,GRIN3B,HOMER1,SLC22A3,SNCG,TSPAN8
enalapril		biologic drug		-0.447	-0.437	0.00627	ADIPOQ,AGTR2,ASNS,SERPINE1,SPP1
Lh		complex		0.795	0.816	0.00627	ADCY7,CARD10,COL15A1,DUSP14,EREG,FOS,GEM,HSD11B1,MMP2,PHKA2,RUNX1,TNFRSF11B
NTRK2	-1.39	kinase				0.00642	APP,CDKN1A,EGR1,FOS,SERPINE1,SPP1
ciglitazone		chemical drug		-0.621	-0.628	0.00642	CDKN1A,KLK3,MMP2,NOX4,PPARG,SERPINE1
fluoxetine		chemical drug		-0.13	-0.109	0.00642	EGR1,FOS,KCNA5,MMP2,NOS1,SERPINA3
tetracycline		chemical drug		0.447	0.459	0.00642	CA3,CCN2,LRIG3,SERPINE1,SLC1A4,TF
Z-LLL-CHO		chemical - protease inhibitor		0.253	0.301	0.00642	APP,ATF3,CCN2,CDKN1A,CEBPA,FASN,FOS,HIF1A,JUN,KLK3,MMP2,NOX4,PPARG,PTGFR,SLC27A1
8-bromo-cAMP		chemical reagent		0.607	0.648	0.00648	ADRB3,APP,CCN2,EGR1,FOS,JUN,NOS1,PTGFR,SERPINE1,SPP1
14,15-epoxyeicosatrienoic acid		chemical - endogenous mammalian				0.00649	ADIPOQ,FABP4,TNFRSF11B
EGLN3	0.384	enzyme				0.00649	HIF1A,MYOG,TNFRSF11B
EREG	3.722	growth factor				0.00649	EREG,HBEGF,TNC
Endothelin		group				0.00649	APP,FOS,JUN
FMO3		enzyme				0.00649	FASN,FGF21,SCD
GLIS2	0.002	transcription regulator				0.00649	CCN2,LTBP2,SERPINE1
GRK2	-0.201	kinase				0.00649	FOS,MYH11,TNFRSF11B
Go6983		chemical - kinase inhibitor				0.00649	CCN2,FOS,PPARG
MC4R		g-protein coupled receptor				0.00649	FASN,FOS,LEP
PKNOX2	0.937	transcription regulator				0.00649	CDKN1A,EGR1,GADD45A
batimastat		chemical - protease inhibitor				0.00649	FABP4,LIPE,MMP2
ethidium		chemical drug				0.00649	CCN1,CCN2,SERPINE1
latrunculin B		chemical reagent				0.00649	CCN2,CNN1,FOS
mir-137		microrna				0.00649	APP,SOX17,ZNF365
STAT1	-0.835	transcription regulator		-0.237	-0.181	0.00662	CD274,CDKN1A,CYP2E1,EGR1,FOS,GBP6,HIF1A,JUN,MAFA,NOX4,PDGFC,PPARG,RUNX1,SERPINA3,Tgtp1/Tgtp2
IL1RN	2.08	cytokine		-1.373	-1.419	0.00665	ATF3,CHAC1,CYP2E1,HSD11B1,SERPINE1,SPP1,TAC1
MLXIPL	-2.015	transcription regulator		-1.483	-1.434	0.00665	ACSS2,FASN,FGF21,HIF1A,Rpl29 (includes others),SCD,THRSP
ALDH1A2	0.826	enzyme	Inhibited	-2	-2.014	0.00667	ATF3,CCN1,CCN2,SPP1
ARHGAP31	-0.414	other		1	0.989	0.00667	CCN2,COL5A1,GDF15,JUN
ARRB2	-0.331	other				0.00667	EGR1,HIF1A,MMP2,SERPINE1
TERC		other				0.00667	CDKN1A,EGR1,H19,Orm1 (includes others)
anandamide		chemical - endogenous mammalian		1.103	1.125	0.00667	FOS,MMP2,NOS1,PPARG
tempol		chemical drug		-1.982	-2.008	0.00667	NOS1,PLAUR,SERPINE1,SPP1
zoledronic acid		chemical drug		-1.067	-1.083	0.00667	CCN1,MMP2,NOX4,TNFRSF11B
NFKBIA	-0.26	transcription regulator		-0.009	0.018	0.00668	CARD10,CDKN1A,COL2A1,COL5A2,EREG,ERO1A,FOS,GADD45A,Gstt1,HIF1A,HLA-A,IRX3,JUN,SERPINE2,SOX9,TAC1,TNC,TNFRSF11B
EGLN		group		0.586	0.518	0.00673	ADM2,Apoc3,Apol11b (includes others),Mup1 (includes others),Orm1 (includes others),SERPINE1,SLC16A3,SLC27A1,SOX9
3,3'-diindolylmethane		chemical drug		1.413	1.418	0.00684	ATF3,CDKN1A,FASN,GDF15,HLA-A
CUL3	0.305	enzyme		-1.342	-1.353	0.00684	Acan,COL2A1,COL9A1,HAPLN1,SPON1
decitabine		chemical drug		1.081	1.121	0.00687	ABCC1,ADCY5,CCN2,CDH11,CDKN1A,CLDN5,CYP4B1,GDF15,GFRA1,GLRB,H19,HBEGF,LUM,MMP2,NFASC,OSTN,PLAAT1,PPARG,RASGRF2,RCC2,ROBO1,SDC2,SNCG,SPINT2,SPP1,TNC,VCAN
Il3		cytokine	Activated	2.389	2.411	0.00689	CDKN1A,COL2A1,EGR1,FOS,SOX9,SPP1	Ap1,CTNNB1,EGR1,ELK1,ERK1/2,FOXO3,HIF1A,HRAS,Il3,MAPK3,NFkB (complex),RAC1,SMAD1,SMAD3,SMAD4,SP1
VDR	2.411	transcription regulator		0.85	0.874	0.00699	ADIPOQ,CDKN1A,EGR1,GADD45A,JUN,LEP,LIPE,MYH8,MYOG,PNPLA2,PPARG,SPP1
TWIST1	0.072	transcription regulator		-0.843	-0.819	0.00705	Acan,CDKN1A,COL2A1,FOS,LRG1,MMP2,SPP1,TF,VCAN
GAST		other	Activated	2.425	2.477	0.00738	EGR1,FOS,HBEGF,JUN,PPARG,TNC	Ap1,CTNNB1,EGR1,ELK1,ERK,ERK1/2,FOXO3,GAST,HIF1A,MAPK3,NFkB (complex),PPARG,SMAD1,SMAD3,SMAD4,SP1,STAT6
PRNP	0.914	other		-0.6	-0.593	0.00738	APP,EGR1,MMP2,PLAUR,PRNP,SOX9
F2RL1	-0.531	g-protein coupled receptor		1.473	1.514	0.00745	CCN1,CCN2,FOS,GBP6,HBEGF
NOG	2.887	growth factor				0.00745	CCN2,MYOG,NOG,SPP1,VCAN
hexachlorobenzene		chemical toxicant		1.387	1.434	0.00745	ASNS,FCGR2A,MMP2,SPP1,TSPAN8
CAMK4	0.684	kinase		0.924	0.955	0.00748	ATF3,CDKN1A,FOS,JUN
CASZ1	-0.451	enzyme	Inhibited	-2	-2.012	0.00748	Acan,COL2A1,KCNK3,XYLT1
HOTAIR		other		-0.346	-0.333	0.00748	CDKN1A,GDF15,HIF1A,MMP2
TRH		other		1.94	1.954	0.00748	F2R,FOS,JUN,KCNA5
amiodarone		chemical drug				0.00748	CA3,PPARG,SCD,TF
cyclopamine		chemical reagent		-0.013	-0.032	0.00748	CDKN1A,HHIP,SOX9,SPP1
ethylene glycol tetraacetic acid		chemical reagent		-1	-1.032	0.00748	COL2A1,EGR1,FOS,THRSP
fluvastatin		chemical drug				0.00748	APP,CDKN1A,PON1,SERPINE1
ETV5	0.805	transcription regulator		0.447	0.46	0.00749	FASN,GALNT3,ICAM2,MMP2,SCD,SPP1,TINAGL1
IGF1R	0.13	transmembrane receptor		0.632	0.676	0.0075	APP,CDKN1A,CEBPA,EGR1,FASN,FOS,H19,HIF1A,LIPE,MYOG,RTL1,SNCG
MAP3K5	-0.48	kinase				0.00774	CCN2,CDKN1A,JUN
MED12	0.191	transcription regulator				0.00774	EGR2,EREG,GDF15
RND3	0.367	enzyme				0.00774	CDKN1A,HIF1A,MMP2
SGPL1	0.22	enzyme				0.00774	ABCC1,APP,PPARG
aphidicolin		chemical toxicant				0.00774	CDKN1A,GADD45A,MYOG
glycine		chemical - endogenous mammalian				0.00774	CDKN1A,FOS,PCK2
leuprolide		biologic drug				0.00774	APP,EGR1,MMP2
magnesium		chemical - endogenous mammalian				0.00774	CDKN1A,MYOG,TNFRSF11B
salvin		chemical toxicant				0.00774	CES1,EGR1,FABP4
IL3		cytokine		1.542	1.591	0.0079	CDKN1A,EGR1,EGR2,F2R,FASN,FCGR2A,FOS,GADD45A,HBEGF,HLA-A,JUN,PROX1,Rpl29 (includes others),SERPINA3,SLC3A2
DYSF	-0.652	other				0.0079	CFD,ERRFI1,HLA-A,MYOG,SERPINA3,UGT1A6
EPO		cytokine	Activated	2.558	2.593	0.00795	CDKN1A,EGR1,FABP5,FOS,GDF15,Ifi27l2a/Ifi27l2b,JUN,MMP2,MYOG,RCC2,SPP1,TF,TNFRSF11B	Ap1,CTNNB1,EGR1,ELK1,EPO,ERK,ERK1/2,FOXO3,HIF1A,Jnk,MAPK3,NFkB (complex),PRKCB,SMAD1,SMAD3,SMAD4,SP1,SRC,STAT6,nitric oxide
RBPJ	0.719	transcription regulator		-0.48	-0.509	0.00808	CDKN1A,DLL1,FGF1,FOS,JUN,MSTN,MYOG,SOX9,TNC
N-methyl-D-aspartate		chemical drug		1.411	1.442	0.0081	APP,EGR1,FOS,HOMER1,SLC7A3
NKX3-1		transcription regulator				0.0081	CA3,FOS,KLK3,RUNX1,STEAP1
MSX2		transcription regulator				0.00835	EGR2,PPARG,PROX1,SPP1
NORAD		other	Activated	2	2.048	0.00835	CCN1,CCN2,COL5A1,JUN
lipid		chemical - endogenous mammalian				0.00835	ADIPOQ,PCK2,PON1,RARRES2
xanthohumol		chemical drug		1	0.958	0.00835	DGAT2,FASN,FOS,SCD
pyrrolidine dithiocarbamate		chemical reagent		-1.326	-1.37	0.00839	CCN2,FABP4,HIF1A,MMP2,PPARG,SERPINE1,SOX9
SOX3		transcription regulator		-0.447	-0.496	0.00844	APCDD1,DLL1,FRZB,IRX3,SOX17,SOX9
TBX2	-0.97	transcription regulator		-0.956	-0.939	0.00844	ATF3,CDKN1A,MCM6,PHTF2,PKMYT1,TRIB3
ADCYAP1R1	-1.544	g-protein coupled receptor				0.00845	EGR2,FOS
AGR2		other				0.00845	EGR1,FOS
AKAP12	-1.029	transporter				0.00845	HIF1A,MMP2
AMER1	-0.399	other				0.00845	CDKN1A,LGR5
ANGPTL3	-1.777	growth factor				0.00845	ACSS2,SCD
BAG6	-0.077	enzyme				0.00845	CDKN1A,SERPINE1
CA9	-0.259	enzyme				0.00845	Acan,COL2A1
CPXM1	0.853	peptidase				0.00845	COL15A1,COL5A1
ERBIN	0.369	other				0.00845	CDKN1A,SERPINE1
ERCC1	0.023	enzyme				0.00845	CDKN1A,DIO1
F Actin		complex				0.00845	CCN2,MMP2
GLP-1 (7-36) amide		biologic drug				0.00845	FASN,SCD
GSN	-1.052	other				0.00845	COL2A1,SOX9
HTR2C		g-protein coupled receptor				0.00845	LEP,PPARG
KAT7	-0.094	enzyme				0.00845	CDKN1A,KLK3
PRKAB1	0.058	kinase				0.00845	HIF1A,LEP
PRKG2	-1.081	kinase				0.00845	FOS,SOX9
PROK2		other				0.00845	FOS,HIF1A
SERPIND1		other				0.00845	EGR1,F2R
SLCO1B3		transporter				0.00845	CDKN1A,GPT
SNW1	0.304	transcription regulator				0.00845	CDKN1A,SERPINE1
TDO2		enzyme				0.00845	SLC1A4,SLC7A11
TRIM33	-0.008	transcription regulator				0.00845	RUNX1,SERPINE1
USP2	-0.03	peptidase				0.00845	FABP4,SERPINE1
ZNRF3	-0.128	enzyme				0.00845	CYP2E1,SOX9
capsazepine		chemical toxicant				0.00845	FOS,TAC1
diltiazem		chemical drug				0.00845	FOS,JUN
drospirenone		chemical drug				0.00845	ADRB3,PPARG
ganglioside GM1		chemical - endogenous mammalian				0.00845	APP,TAC1
saquinavir		chemical drug				0.00845	FABP4,LIPE
taspoglutide		biologic drug				0.00845	FABP5,PLIN1
teichoic acid		chemical - endogenous non-mammalian				0.00845	HIF1A,MMP2
triolein		chemical drug				0.00845	FASN,THRSP
vanillyl-N-nonylamide		chemical drug				0.00845	ATF3,GADD45A
triamcinolone acetonide		chemical drug	Inhibited	-2.53	-2.533	0.00865	ADCY7,ATF3,EGR1,FOS,JUN,NOS1,RUNX1,SCD,SERPINA3,SPP1
1810019D21Rik		other		-0.447	-0.47	0.00879	CDKN1A,COL9A3,SLC7A11,UGT1A6,ZNF365
EFNA1	-0.236	other		-1.342	-1.352	0.00879	CCN2,FABP5,NEDD4L,SOX9,TRIM5
NOTCH3	-1.477	transcription regulator		1.461	1.501	0.00879	CDH11,CDKN1A,COL5A1,MYH11,SDC2
TSH		complex		0.931	0.966	0.00879	CDKN1A,DIO1,EGR1,FOS,NOX4
CYB5R4	0.338	enzyme				0.00912	ATF3,FASN,SCD
Ctbp		group				0.00912	GADD45A,PLAUR,STAP2
Fgfr		group				0.00912	FOS,LGR5,SPP1
Fibrin		complex				0.00912	CNN1,COL2A1,SERPINE1
LY6E	-1.084	other				0.00912	CCN2,CD274,SERPINE1
NF2	0.028	other				0.00912	CDKN1A,MMP2,PLAUR
SAV1	-0.167	other				0.00912	CCN2,CDKN1A,SPP1
Sch-23390		chemical drug				0.00912	EGR1,EGR2,FOS
TBXT		transcription regulator				0.00912	COL2A1,HAPLN1,SOX9
TERF2IP	0.066	other				0.00912	CA6,CCN2,H19
cyclooxygenase		group				0.00912	FOS,TAC1,TNN
kawain		chemical - endogenous non-mammalian				0.00912	ADIPOQ,CEBPA,PPARG
lisinopril		biologic drug				0.00912	FOS,JUN,MMP2
ACVRL1	-0.846	kinase				0.00929	CDKN1A,GDF15,PLAUR,SERPINE1
NFIB	-0.028	transcription regulator				0.00929	CYP4B1,GFRA1,SLC16A14,STEAP4
PLIN5	-2.247	other		0	-0.003	0.00929	ACSM5,FASN,PNPLA2,PPARG
ouabain		chemical drug		1.057	1.075	0.00929	AGTR2,CDKN1A,FOS,HIF1A
thalidomide		chemical drug				0.00929	APP,GDF15,PLAUR,SERPINE1
laquinimod		chemical drug		0.478	0.542	0.00938	Apol11b (includes others),DUSP14,NFASC,SLC7A11,STBD1,THRSP,UGT1A6
CLDN7	0.034	other		0.57	0.568	0.0099	CCN2,CLIP4,MMP2,PKMYT1,PLAAT3,PRNP,TINAGL1
CX3CL1	0.389	cytokine		0	0.012	0.00999	APCDD1,FABP5,HIF1A,MMP2,NDNF,PPARG,SDK2,SPP1
FGF10	-2.792	growth factor		-0.277	-0.226	0.0103	LIPE,SCD,SOX9,Tgtp1/Tgtp2,TSPAN8
MUC1		other		-0.145	-0.117	0.0103	ABCC1,CDH11,FASN,HIF1A,Ifitm1
RPS6KB1	-0.193	kinase		1.067	1.084	0.0103	CDKN1A,HIF1A,MYH11,SERPINE1
bicalutamide		chemical drug		-0.445	-0.473	0.0103	CEBPA,FOS,KLK3,MMP2
verapamil		chemical drug				0.0103	FOS,GPT,JUN,MYOG
cholecalciferol		chemical - endogenous mammalian		0.538	0.569	0.0104	CEBPA,FOS,JUN,PPARG,SERPINE1,SPP1,TNFRSF11B
CaMKII		complex				0.0106	COL2A1,FOS,SOX9
Collagen type IV		complex				0.0106	MMP2,PLAUR,SERPINE1
DSP		other				0.0106	ADIPOQ,CEBPA,PPARG
GABA		chemical - endogenous mammalian				0.0106	ADIPOQ,FOS,MMP2
JUN/JUNB/JUND		group				0.0106	CCN1,FOS,JUN
KISS1		other				0.0106	EGR1,FOS,KLK3
SMARCD3	-0.506	transcription regulator				0.0106	COL2A1,HAPLN1,SOX9
W7		chemical reagent				0.0106	COL2A1,FOS,KLK3
puromycin		chemical - endogenous non-mammalian				0.0106	ABCC1,NOX4,SERPINE1
ARNT2	0.464	transcription regulator		-1.554	-1.474	0.0106	AQP7,Cd1d2,DLL1,EGR1,FCGR2A,HLA-A,HOMER1,KLK3,LRRFIP1,Rpl29 (includes others),UGT1A6
RETNLB		other		0	0.054	0.0109	CCN2,FABP4,FRZB,MMP2,Mup1 (includes others),TINAGL1
cocaine		chemical drug	Activated	2.012	2.053	0.0109	DUSP14,EGR1,EGR2,FOS,GADD45A,HOMER1,JUN,NOS1,TAC1
3-deazaneplanocin		chemical drug		1.172	1.206	0.0111	CD274,CDKN1A,HIF1A,KCNC4,SLPI
CLEC4G		other		1.342	1.362	0.0111	CCN2,FGF1,GPT,HBEGF,SCRG1
TSC1	0.109	other		-0.2	-0.195	0.0111	CCN2,CYP2E1,EGR2,FASN,LGR5
USF2	-0.102	transcription regulator		-0.872	-0.83	0.0111	FASN,KLK3,SERPINE1,SPP1,THRSP
entinostat		chemical drug		-0.094	-0.089	0.0111	CDKN1A,HIF1A,LGR5,MMP2,SERPINE1
TGFBR2	0.502	kinase		1.377	1.385	0.0113	CCN2,CDKN1A,HSD11B1,JUN,Kcnn2,MMP2,SERPINE1,SPP1,TNFRSF11B,ZNF365
MEN1	0.013	transcription regulator		-0.152	-0.135	0.0114	CDKN1A,FABP4,FOS,MAFA
PP1		chemical - kinase inhibitor		-1.982	-2.011	0.0114	FOS,JUN,MMP2,SERPINE1
SB-431542		chemical reagent		-1.912	-1.932	0.0116	CCN2,FOS,Kcnn2,MMP2,SERPINE1,SPP1,XYLT1
2-oxoglutaric acid		chemical - endogenous mammalian				0.0116	HIF1A,PNPLA2
ARAF	-0.445	kinase				0.0116	FOS,MYOG
CCL1		cytokine				0.0116	MMP2,SERPINE1
CD160		transmembrane receptor				0.0116	FOS,JUN
CHCHD5	-0.331	other				0.0116	FASN,PPARG
EGR4		transcription regulator				0.0116	EGR1,EGR2
EPB41	-0.213	other				0.0116	Ank2,MYOG
GUSB	0.386	enzyme				0.0116	CCN1,EGR2
HTR4		g-protein coupled receptor				0.0116	ADIPOQ,LEP
ITGB1BP1	-0.332	other				0.0116	CDKN1A,DLL1
Igkv1-117		other				0.0116	CDKN1A,JUN
MDL 28170		chemical toxicant				0.0116	APP,PRNP
MSI1	-0.046	other				0.0116	CDKN1A,TAC1
NKX3-2	1.789	transcription regulator				0.0116	COL2A1,SOX9
PADI4		enzyme				0.0116	CDKN1A,GADD45A
PAX9		transcription regulator				0.0116	COL2A1,SOX9
PIK3C3	-0.051	kinase				0.0116	HLA-A,TIMD4
PLA2G1B		enzyme				0.0116	LEP,PPARG
PPM1A	-0.212	phosphatase				0.0116	CDKN1A,MMP2
PSENEN	0.007	peptidase				0.0116	APP,DLL1
SCUBE3	-0.923	other				0.0116	MMP2,SERPINE1
SIAH1	0.152	enzyme				0.0116	CDKN1A,HIF1A
TBL1X	-0.121	transcription regulator				0.0116	DIO1,KLK3
TBL1XR1	0.498	transcription regulator				0.0116	DIO1,HP
VCL	0.031	enzyme				0.0116	Acan,COL2A1
ZNF143	0.024	transcription regulator				0.0116	CEBPA,NOS1
acrylamide		chemical toxicant				0.0116	FOS,JUN
aplidine		biologic drug				0.0116	FOS,JUN
buserelin		biologic drug				0.0116	EGR1,FOS
lidocaine		chemical drug				0.0116	APP,FOS
miR-217-5p (and other miRNAs w/seed ACUGCAU)		mature microrna				0.0116	FASN,SCD
mir-224		microrna				0.0116	CDKN1A,DIO1
nicorandil		chemical drug				0.0116	ATF3,JUN
protocatechuic acid		chemical - endogenous non-mammalian				0.0116	APP,HIF1A
quinidine		chemical drug				0.0116	AGTR2,CDKN1A
rh-endostatin		chemical drug				0.0116	JUN,KLK3
rosmarinic acid		chemical - endogenous non-mammalian				0.0116	CCN2,MMP2
saikosaponin A		chemical reagent				0.0116	FOS,JUN
thymidine		chemical - endogenous mammalian				0.0116	CDKN1A,LGALS12
trifluoperazine		chemical drug				0.0116	EGR1,NOS1
trimethyltin		chemical reagent				0.0116	FOS,P2RX1
vismodegib		chemical drug				0.0116	SOX9,TNFRSF11B
volinanserin		chemical drug				0.0116	EGR1,FOS
FN1	2.888	enzyme		1.809	1.851	0.0118	APP,CCN1,CCN2,CDKN1A,FOS,MMP2,PLAUR,SERPINE1,SOX9,SPP1
PKD1	0.886	ion channel		-1.434	-1.447	0.0118	ADCY7,CCN1,CCN2,CDKN1A,EDIL3,GREM1,HBEGF,JPH2,KLK3,TNFRSF11B
BRCA1	0.03	transcription regulator		0.8	0.819	0.0118	CARD10,CDKN1A,EGR1,GADD45A,GDF15,KLK3,ROBO1,SERPINE2,VCAN
mono-(2-ethylhexyl)phthalate		chemical toxicant	Inhibited	-2.401	-2.338	0.0118	ADIPOQ,CEBPA,DGAT2,FABP4,FASN,FOS,LIPE,PC,PPARG
GNA12	-0.074	enzyme		-0.686	-0.662	0.0119	CNN1,F2R,FOS,MMP2,MYH11
HIC1	-0.782	transcription regulator		0.447	0.439	0.0119	CDKN1A,CDO1,SLC7A11,SOX9,SPP1
benzene		chemical toxicant		-0.156	-0.152	0.0119	ACVR1C,ARHGAP18,CDKN1A,CYP2E1,EGR1
CLOCK	-0.113	transcription regulator		-0.478	-0.484	0.012	APP,CCN2,CEBPA,F2R,FASN,FGF1,GADD45A,KCNS1,MOXD1,SCD,TIMP4,Trim30a/Trim30d
FOXM1	0.194	transcription regulator		0.628	0.681	0.012	CDKN1A,CENPB,FOS,JUN,MMP2,PLAUR,PTTG1,VCAN
IKBKG	0.108	kinase		1.232	1.28	0.012	EREG,FOS,GPT,Gstt1,HIF1A,HLA-A,PPARG,SERPINE2
halofuginone		chemical drug		-1.982	-2.014	0.012	AACS,CCN2,EGR1,F2R,FBN1,H19,MMP2,SPP1
5-hydroxytryptamine		chemical - endogenous mammalian	Activated	2.592	2.639	0.0122	CCN2,EGR1,F2R,FOS,HBEGF,HIF1A,SERPINE1
STK11	-0.449	kinase		-0.638	-0.616	0.0123	ATF3,CD274,CDKN1A,CEBPA,EREG,GADD45A,HIF1A,LUM,MMP2,PCK2,PPARG,SERPINE1,SPP1
ADM2	5.03	other				0.0123	FGF21,FOS,LEP
CL 316243		chemical drug				0.0123	FASN,FGF21,SCD
HTATIP2	0.99	transcription regulator				0.0123	FOS,MMP2,SPP1
MAP3K3	0.326	kinase				0.0123	FOS,JUN,STEAP4
MAPK8IP1	0.095	other				0.0123	APP,FOS,JUN
Mir200		group				0.0123	CRTAP,JUN,NEO1
NADPH oxidase		complex				0.0123	FOS,JUN,SERPINE1
NTF3	-0.814	growth factor				0.0123	FOS,JUN,TAC1
RACK1	0.221	enzyme				0.0123	CDKN1A,FOS,HIF1A
TAF4B	0.477	transcription regulator				0.0123	CCN2,JUN,SPP1
diallyl disulfide		chemical - endogenous non-mammalian				0.0123	ATF3,CYP2E1,GDF15
methyl-beta-cyclodextrin		chemical drug				0.0123	HIF1A,PPARG,SERPINE1
octreotide		biologic drug				0.0123	CDKN1A,FOS,PPARG
CBFB	0.75	transcription regulator		1.98	1.977	0.0123	CEBPA,FABP4,KLK3,PPARG,RUNX1,SPP1
vancomycin		biologic drug		0.842	0.874	0.0123	ASNS,FCGR2A,NOX4,SCD,SPP1,TSPAN8
FASLG		cytokine				0.0125	EGR1,EGR2,FOS,TNFRSF11B
H-7		chemical - kinase inhibitor		-1.953	-1.989	0.0125	Acan,EGR1,FOS,SERPINE1
T3-TR-RXR		complex		-0.849	-0.811	0.0125	FASN,HP,SLC16A3,THRSP
Wnt		group				0.0125	CEBPA,PPARG,SDC2,SOX9
monocrotaline		chemical toxicant				0.0125	GADD45A,MMP2,SMAD9,SPP1
LCK	-0.867	kinase		1.982	2.015	0.0128	EGR1,FOS,JUN,PPARG,RUNX1
lipoteichoic acid		chemical - endogenous non-mammalian		1.951	1.989	0.0128	GLRB,HIF1A,MMP2,SLC16A3,TNFRSF11B
bisphenol A		chemical - endogenous mammalian		1.406	1.436	0.0128	ADIPOQ,CCN2,CDKN1A,CFD,EGR1,EREG,FOS,LEP,PPARG
POU2F1	-0.252	transcription regulator				0.0128	Aldh1a7,CDO1,GADD45A,Gstt1,KLK3,SLC7A11,SPP1
ARNT	0.113	transcription regulator				0.0135	ERO1A,FGF21,HIF1A,LEP,PCK2,SERPINE1,UGT1A6
PSMB11		peptidase		-1.912	-1.962	0.0135	COL5A1,GADD45A,OLFML2B,RARRES2,ROBO2,THBS3,VCAN
RRP1B	0.128	transcription regulator				0.0135	ADCY7,CDKN1A,GADD45A,MCM6,PDGFC,SERPINE2,SPP1
baicalein		chemical drug				0.0137	FOS,JUN,MMP2,PTTG1
beta-naphthoflavone		chemical toxicant				0.0137	CCN1,CYP4B1,FOS,UGT1A6
discodermolide		chemical drug				0.0137	CDKN1A,GADD45A,PKMYT1,PTTG1
fasudil		chemical drug		-0.882	-0.901	0.0137	CCN2,JUN,MMP2,MYH11
BGN	1.633	other				0.0141	FBN1,LRP6,SERPINE1
CHI3L1	1.213	enzyme				0.0141	CDH11,SERPINE1,TNC
ETS		group				0.0141	EGR1,FOS,SERPINE1
IPMK	0.235	kinase				0.0141	CCN1,FOS,JUN
LTF	0.745	peptidase				0.0141	CDKN1A,PLIN1,TNFRSF11B
MEF2		group				0.0141	JUN,MYH11,MYOG
MTA2	-0.19	transcription regulator				0.0141	CDKN1A,GPT,JUN
NFIX	0.601	transcription regulator				0.0141	FABP4,SERPINA3,SERPINE1
Ro41-5253		chemical reagent				0.0141	CDKN1A,FABP4,PPARG
SOX6	0.75	transcription regulator				0.0141	Acan,CDKN1A,COL2A1
UBE3A	0.017	enzyme				0.0141	CDKN1A,SERPINE1,SOX9
kaempferol		chemical toxicant				0.0141	CDKN1A,JUN,MMP2
HMGA1	0.772	transcription regulator		1.134	1.151	0.0143	CCN1,EGR1,FOS,H19,IGFALS,LIPE,PPARG,SOX17
erlotinib		chemical drug		0.647	0.684	0.0146	EGR1,FBN1,NOX4,PLAUR,SERPINE1,TNFRSF11B
HMGB1		transcription regulator		0.692	0.73	0.0147	CD274,CDKN1A,FASN,HIF1A,MYOG
NFATC3	0.435	transcription regulator		1	1.034	0.0147	ATF3,EGR2,FOS,JUN,PPARG
LMNA	0.613	other				0.0148	AF366264 (includes others),CCN2,CEBPA,FABP4,JUN,LEP,MYOG,PLXDC2,PPARG,SEMA3G,SOX13,SPP1
EFNA5	-0.325	kinase				0.015	CCN2,FABP5,NOS1,SOX9
n-3 fatty acids		chemical drug		-0.371	-0.372	0.015	ADIPOQ,FASN,PPARG,SCD
(-)-epicatechin gallate		chemical - endogenous non-mammalian				0.0153	GDF15,SPP1
AGRP		other				0.0153	FOS,LEP
ARID5A	0.67	transcription regulator				0.0153	COL2A1,PPARG
ARV1	0.083	transporter				0.0153	FGF21,LEP
CBX1	0.112	transcription regulator				0.0153	CDKN1A,MYOG
CD244	-0.155	transmembrane receptor				0.0153	EGR1,FOS
DAB2IP	-0.648	other				0.0153	CDKN1A,EGR1
DHH	-1.625	peptidase				0.0153	HHIP,TAC1
ENTPD1	-0.967	enzyme				0.0153	P2RX1,SERPINE1
FANCA	-0.141	other				0.0153	CDKN1A,EGR1
JNJ-39933673		chemical reagent				0.0153	SCD,SPP1
KLB	-3.729	enzyme				0.0153	EGR1,FOS
L-type Calcium Channel		complex				0.0153	EGR1,FOS
Lefty		group				0.0153	CCN2,CDKN1A
N4BP1	-0.067	other				0.0153	HLA-A,JUN
PBX2	-0.345	transcription regulator				0.0153	COL5A2,FOS
PEA15	-0.197	transporter				0.0153	EGR2,JUN
PNU282987		chemical reagent				0.0153	FASN,MAFA
PPBP		cytokine				0.0153	COL15A1,SERPINE1
Presenilin		group				0.0153	APP,PRNP
SMARCA1	0.308	transcription regulator				0.0153	CDKN1A,GADD45A
TEAD		group				0.0153	CCN1,CCN2
acetone		chemical - endogenous mammalian				0.0153	AGPAT2,CYP2E1
allyl isothiocyanate		chemical toxicant				0.0153	FOS,MMP2
alpha-tocopherol succinate		chemical drug				0.0153	EGR1,FGF1
aristolochic acid I		chemical toxicant				0.0153	FOS,LEP
dantrolene		chemical drug				0.0153	APP,NOS1
dehydroepiandrosterone sulfate		chemical - endogenous mammalian				0.0153	PPARG,TRIM63
fingolimod phosphate		chemical - endogenous mammalian				0.0153	CCN2,SERPINE1
nitroglycerin		chemical drug				0.0153	NOS1,PLAUR
phosphatidylcholine		chemical - endogenous mammalian				0.0153	CYP2E1,SCD
ponesimod		chemical drug				0.0153	CCN2,SERPINE1
racemic flurbiprofen		chemical drug				0.0153	APP,THRSP
sodium dodecyl sulfate		chemical drug				0.0153	FABP5,SERPINE2
tolbutamide		chemical drug				0.0153	AGTR2,EGR1
tolfenamic acid		chemical drug				0.0153	ATF3,CYP2E1
OSMR	0.105	transmembrane receptor				0.0158	ARTN,FASN,FOS,LRG1,SCD
doxycycline		chemical drug		1	1.001	0.0158	ASNS,CHAC1,EGR2,MMP2,PCK2
ursodeoxycholic acid		chemical - endogenous mammalian		1.406	1.418	0.0158	CCN2,CYP2E1,FASN,GPT,SPP1
ACVR1C	-3.53	kinase				0.016	CDKN1A,FOS,SERPINE1
ADCY		group				0.016	CDKN1A,FOS,LEP
CDC73	0.369	other				0.016	APP,H19,RUNX1
DTX1	0.832	transcription regulator				0.016	EGR1,GFRA1,SPP1
HAND1		transcription regulator				0.016	DBI,FABP4,LIPE
MAC		complex				0.016	EGR1,EGR2,SPP1
NFAT (complex)		complex				0.016	ATF3,SERPINE1,SPP1
SKI	0.581	transcription regulator				0.016	CDKN1A,MYOG,SERPINE1
TRPC1	0.726	ion channel				0.016	CDKN1A,HIF1A,MYOG
USP7	-0.065	peptidase				0.016	CDKN1A,KLK3,PPARG
deoxycorticosterone acetate		chemical drug				0.016	MYH11,SPP1,TNC
p70 S6k		group				0.016	FASN,NOX4,SCD
rimonabant		chemical drug				0.016	ADIPOQ,FOS,SERPINE1
CSF1R	0.221	kinase		1.982	2.028	0.0163	CDKN1A,FOS,JUN,LGR5
EP400	0.086	other				0.0163	AGPAT2,CDKN1A,FABP4,PPARG
NME1	-0.079	kinase		-1.901	-1.92	0.0163	CCN2,CDKN1A,MMP2,SERPINE1
NOS3	-1.522	enzyme		-0.927	-0.918	0.0163	ADIPOQ,ATF3,CCN2,MMP2
NOTCH2	0.558	transcription regulator		0.183	0.206	0.0163	CNN1,MYH11,SDC2,SOX9
PRKAA		group		1.154	1.145	0.0163	CDKN1A,FASN,HSD11B1,KLK3
carrageenan		chemical drug		1.951	1.998	0.0163	EGR1,EGR2,FOS,JUN
dorsomorphin		chemical - kinase inhibitor		-0.914	-0.919	0.0163	CD274,COL2A1,EGR1,SOX9
COL18A1	-0.03	other	Inhibited	-2.425	-2.47	0.0163	F2R,FOS,HIF1A,JUN,MMP2,SERPINE1
CDKN1B	0.383	kinase		-0.61	-0.659	0.0164	Adig,APCDD1,CA6,CDKN1A,EGR1,RUNX1,SERPINE1
MAP4K4	-0.556	kinase	Activated	2.589	2.531	0.0164	CEBPA,FASN,MAFA,MGLL,PPARG,PXMP2,SCD
RB1	-0.789	transcription regulator		0.215	0.237	0.0165	CCN2,CDKN1A,CEBPA,COL5A1,EGR1,FABP4,FOS,GPR4,HIF1A,HOMER1,LGR5,MCM6,MMP2,MYH8,PPARG,PTTG1,REEP1,SERPINE1
MAPT	0.516	other		0	0.007	0.0167	Ank2,APP,CDKN1A,DBI,FASN,FOS,GEM,H4C9,HIF1A,JUN,NOS1,PRNP,SERPINE1,SLC16A3,TUBA1B
ZFPM1	-0.661	transcription regulator				0.0168	CEBPA,HEBP1,MMD,PLAAT3,PTGER3
minocycline		chemical drug	Inhibited	-2.213	-2.256	0.0168	ATF3,FOS,MMP2,NOS1,SLC3A2
Nr1h		group		-0.73	-0.748	0.0169	Apoc1,C2,F2R,FASN,FGF1,LIPE,PLIN1,SCD
filgrastim		biologic drug		0.457	0.441	0.017	AOC3,ATF3,DHRS9,EGR2,FABP5,GADD45A,HHIP,HP,ICAM2,JUN,LGALS12,MELTF,PLAUR,PRKAR2B,SPP1,TST
AG490		chemical - kinase inhibitor		-1.528	-1.573	0.0172	CDKN1A,FOS,HIF1A,MYH11,PTTG1,SPP1
ZFHX3	-0.302	transcription regulator				0.0172	HLA-A,MYOG,PTGER3,PTTG1,TAC1,TUBA1B
ETS1	-0.806	transcription regulator	Activated	2.206	2.255	0.0173	CCN2,CDKN1A,COL2A1,EGR1,FCGR2A,MMP2,RUNX1,SERPINE1,SLC7A11,SPP1
trans-hydroxytamoxifen		chemical drug		-1.093	-1.108	0.0174	COL15A1,EGR1,HIF1A,MMD,MMP2,PLOD2,PTGER3,RUNX1,SNCG
K+		chemical - endogenous mammalian		-0.025	-0.005	0.0177	ATF3,EGR1,FOS,JUN
STAT5a/b		group		-0.277	-0.26	0.0179	CDKN1A,F2R,FOS,IGFALS,MMD,PROX1,PTGER3
KDM8	-0.341	enzyme		-0.447	-0.413	0.018	FASN,KLK3,PC,PCK2,SOX9
RIPK2	-0.009	kinase		1.342	1.376	0.018	DGAT2,FASN,PNPLA2,SCD,SLC27A1
TEAD1	0.065	transcription regulator		1.109	1.15	0.018	CCN1,CCN2,CDKN1A,COL5A2,SDC2
CRYAB	-0.2	other				0.0181	APP,COL2A1,MYOG
HOXB13		transcription regulator				0.0181	BCHE,CDKN1A,KLK3
INHBB	-2.169	growth factor				0.0181	MAFA,SERPINE1,TNC
JINK1/2		group				0.0181	FASN,MMP2,SCD
Smad		complex				0.0181	CCN2,CDKN1A,SERPINE1
dexamethasone phosphate		chemical drug				0.0181	ERRFI1,SOX9,TNFRSF11B
linolenic acid		chemical - endogenous mammalian				0.0181	FASN,SERPINE1,THRSP
sterol		chemical - endogenous mammalian				0.0181	ACSS2,DBI,FASN
trabectedin		chemical drug				0.0181	CDKN1A,GADD45A,PPARG
butyric acid		chemical - endogenous mammalian		-0.948	-0.94	0.0182	CDH11,CDKN1A,COL5A1,COL5A2,FABP4,FASN,FFAR2,FGF21,FOS,GADD45A,KLK3,LEP,PPARG,SERPINE1,SOX9,SPP1
PTGER4	0.989	g-protein coupled receptor		1.732	1.718	0.0184	APP,EGR1,GBP6,HCAR2,MMP2,PTGER3,SPP1,Tgtp1/Tgtp2
MAPK1	0.307	kinase	Activated	2.893	2.895	0.0184	ARSB,ATF3,CCN2,CDKN1A,EGR1,EGR2,FOS,HOMER1,JUN,MAL2,MMP2,SERPINE1,SLITRK6,SPP1,TRIM5
ritonavir		chemical drug		1.715	1.715	0.0188	ADIPOQ,FABP4,LEP,LIPE,PPARG,SCD,UGT1A6
GSTP1	0.59	enzyme				0.0191	ACSM5,CYP2E1,JUN,PON1,SERPINE1,SLC7A11,THRSP,UGT1A6
R5020		chemical reagent		0.068	0.102	0.0191	CCN2,CDKN1A,CEBPA,HBEGF,RASD1
NFAT5	0.406	transcription regulator		1.698	1.746	0.0191	Acan,C2,EREG,NOX4,SPP1,TNFRSF11B
PTGER2	0.515	g-protein coupled receptor		0.526	0.562	0.0191	APP,EGR1,PTGER3,SERPINE1,SPP1,TIMP4
elaidic acid		chemical - endogenous mammalian	Inhibited	-2.449	-2.395	0.0191	CEBPA,DBI,DGAT2,FABP5,FASN,SCD
BSG	0.265	transporter		1.967	1.991	0.0192	HIF1A,MMP2,PLAUR,SERPINE1
GHR	-1.942	transmembrane receptor				0.0192	CDKN1A,LEP,PPARG,SPP1
IFNA1/IFNA13		cytokine		-0.305	-0.278	0.0192	CD274,CYP2E1,GEM,Tgtp1/Tgtp2
obeticholic acid		chemical drug		-1.969	-1.974	0.0192	ADIPOQ,CCN2,CEBPA,PPARG
16,16-dimethylprostaglandin E2		chemical - endogenous mammalian				0.0193	FOS,MMP2
2-hydroxy-1-naphthylaldehyde isonicotinoyl hydrazone		chemical reagent				0.0193	CDKN1A,GADD45A
4-nonylphenol		chemical toxicant				0.0193	FABP4,FOS
8,9-epoxyeicosatrienoic acid		chemical - endogenous mammalian				0.0193	ADIPOQ,FABP4
Agtr1b		g-protein coupled receptor				0.0193	CCN2,FOS
COP1	0.183	enzyme				0.0193	CDKN1A,TRIB3
CTNNBIP1	-0.363	other				0.0193	CDKN1A,KLK3
CYBA	0.077	enzyme				0.0193	CDKN1A,SERPINE1
Ccl6	-1.372	cytokine				0.0193	MMP2,TIMP4
HCRT		other				0.0193	EGR1,FOS
HNRNPD	0.04	transcription regulator				0.0193	CDKN1A,FOS
HOXB5	-1.803	transcription regulator				0.0193	MMP2,PLAUR
LCOR	-0.141	transcription regulator				0.0193	CDKN1A,CYP26B1
LTB4R2		g-protein coupled receptor				0.0193	MMP2,NOX4
MBTPS1	0.657	peptidase				0.0193	FASN,SCD
MEMO1	0.215	other				0.0193	FOS,JUN
MSGN1		transcription regulator				0.0193	DLL1,PPARG
MSI2	0.505	other				0.0193	CDKN1A,CLDN5
PA2G4	0.084	transcription regulator				0.0193	GDF15,KLK3
PRAME		other				0.0193	CDKN1A,CYP26B1
RGCC	-1.2	other				0.0193	FASN,SCD
SU1498		chemical - kinase inhibitor				0.0193	FABP4,TNFRSF11B
Sik1	0.206	kinase				0.0193	FASN,THRSP
TAPI-1		chemical - protease inhibitor				0.0193	APP,MMP2
TGFBR		group				0.0193	CDH11,NOX4
TIP60		complex				0.0193	CDKN1A,COL2A1
TOLLIP	0.126	other				0.0193	FABP4,HIF1A
Trolox C		chemical drug				0.0193	GPT,HIF1A
USP19	-0.054	peptidase				0.0193	MYOG,TRIM63
beta-cyclodextrin		chemical - endogenous non-mammalian				0.0193	FASN,PRNP
calcium chloride		chemical drug				0.0193	MMP2,TNFRSF11B
clonidine		chemical drug				0.0193	EGR1,FOS
darglitazone		chemical drug				0.0193	ADRB3,LEP
mesalamine		chemical drug				0.0193	CD274,PPARG
miR-150-5p (and other miRNAs w/seed CUCCCAA)		mature microrna				0.0193	CLDN5,EGR2
oleoylethanolamide		chemical - endogenous mammalian				0.0193	FOS,SLC27A1
polyamines		chemical - other				0.0193	CEBPA,PPARG
puerarin		chemical drug				0.0193	LEP,RETN
scopolamine		chemical drug				0.0193	BCHE,FOS
sphingomyelin		chemical - endogenous mammalian				0.0193	FASN,SCD
sphingosylphosphocholine		chemical - endogenous mammalian				0.0193	FOS,JUN
tannic acid		chemical toxicant				0.0193	FASN,PPARG
miR-34a-5p (and other miRNAs w/seed GGCAGUG)		mature microrna		-0.503	-0.566	0.0196	APP,ATF3,CDKN1A,DLL1,GFRA1,PPARG,SPINT2
CREM	-0.579	transcription regulator		1.802	1.817	0.0199	ATF3,DUSP14,EGR1,EGR2,ERRFI1,FOS,NOS1,TAC1
ESRRA		ligand-dependent nuclear receptor		-0.97	-0.917	0.0199	CEBPA,FABP4,LIPE,PCK2,PLIN1,PPARG,SPP1,STAC2
Histone h4		group				0.0199	ADIPOQ,CDKN1A,DIO1,FASN,FOS,NEDD4L,PPARG,SPP1
PML	-0.025	transcription regulator	Activated	2.007	2.005	0.0199	ADIPOQ,CDKN1A,FASN,GADD45A,LEP,LIPE,MCM6,SCD
SOX4	-0.494	transcription regulator		1.129	1.174	0.0201	CHAC1,EMB,FFAR2,FOS,Ifitm1,PRXL2A,SERPINE2,SLC7A3,TSPAN6
AGTR2	1.856	g-protein coupled receptor				0.0203	FASN,FOS,MYOG
ATOH1		transcription regulator				0.0203	DLL1,MAFA,NOS1
CDK5	-0.319	kinase				0.0203	CDKN1A,JUN,LRG1
GRP		growth factor				0.0203	FOS,JUN,KLK3
PCYT1A	0.351	enzyme				0.0203	GFRA1,NFASC,SCD
UTP		chemical - endogenous mammalian				0.0203	KCNC4,SERPINE1,SPP1
ozone		chemical toxicant				0.0203	FOS,JUN,SPP1
resolvin E1		chemical - endogenous mammalian				0.0203	ADIPOQ,PPARG,TNFRSF11B
vitamin K3		chemical drug				0.0203	ABCC1,EGR1,FOS
GLI3	0.851	transcription regulator	Activated	2	2.01	0.0203	EGR1,GREM1,HHIP,RUNX1,SOX9
methylmercury		chemical toxicant		0.447	0.453	0.0203	ACVR1C,ARHGAP18,CYP2E1,EGR1,NOS1
CHUK	-0.261	kinase		1.34	1.398	0.0211	ATF3,CDKN1A,EREG,FOS,Gstt1,HLA-A,MMP2,SERPINE2,SPP1,TNFRSF11B
ADAM10	0.185	peptidase				0.0212	APP,FOS,MYOG,NOS1,PRNP,SOX9
sulforafan		chemical drug		-1.226	-1.224	0.0214	CDKN1A,FOS,HIF1A,HP,LIPE,MSTN,UGT1A6
NFKB1	0.104	transcription regulator		0.885	0.935	0.0215	APP,CCN1,CCN2,CDKN1A,CEBPA,COL2A1,EGR1,FOS,GADD45A,GFRA1,SOX9
MAP2K6	0.246	kinase				0.0216	CDKN1A,JUN,MMP2,MYH11,MYOG
PAX7		transcription regulator		0	0.046	0.0216	CDH11,CNTFR,EMB,MEI4,PPARG
PIK3CG	0.367	kinase	Activated	2.412	2.398	0.0223	C2,GBP6,HLA-A,SOX9,Tgtp1/Tgtp2,Trim30a/Trim30d
CBL	0.246	transcription regulator		-1.103	-1.141	0.0225	CDKN1A,FOS,LEP,MMP2
LRP6	1.091	transmembrane receptor				0.0225	APP,FOS,LRP6,MMP2
TEAD3	0.062	transcription regulator	Activated	2	2.043	0.0225	CCN1,CCN2,COL5A2,SDC2
ZBTB20	-0.202	transcription regulator	Inhibited	-2	-1.996	0.0225	ACSS2,FASN,IGFALS,LEP
galactosylceramide-alpha		chemical reagent		0	0.036	0.0225	CCN2,EGR2,FABP4,GPT
CCR1	-0.258	g-protein coupled receptor				0.0227	FOS,MMP2,SPP1
CPE	0.15	peptidase				0.0227	LEP,SOX9,TAC1
DPP4	-0.556	peptidase				0.0227	EGR2,FABP4,MMP2
LHX2	1.876	transcription regulator				0.0227	RARRES2,ROBO1,ROBO2
MST1		growth factor				0.0227	CCN2,FOS,SPP1
NOTCH4	-1.655	transcription regulator				0.0227	CNN1,MYH11,SERPINE1
PRKAR1A	-0.1	kinase				0.0227	LEP,PPARG,PRKAR2B
TAB1	-0.167	enzyme				0.0227	CDKN1A,JUN,SERPINE1
THBS1	1.565	other				0.0227	CCN2,EGR1,MMP2
WR 1065		chemical drug				0.0227	CDKN1A,GADD45A,GDF15
collagen type i (family)		group				0.0227	ABCC1,LUM,SERPINE1
cyanocobalamin		chemical - endogenous mammalian				0.0227	APP,JUN,PRNP
imipramine		chemical drug				0.0227	EGR1,FOS,SERPINA3
mir-23	0.337	microrna				0.0227	LOC102724788/PRODH,SPP1,TRIM63
selenium		chemical drug				0.0227	CDKN1A,CEBPA,KLK3
CYP19A1		enzyme		1.218	1.217	0.0229	FASN,JUN,LEP,PPARG,SOX9
YBX1	-0.492	transcription regulator		1.982	2.013	0.0229	ABCC1,CDKN1A,FOS,MMP2,SPON1
hemin		chemical - endogenous mammalian		-0.871	-0.871	0.0229	CDKN1A,FGF21,HEBP1,JUN,SPP1
nifedipine		chemical drug		-1.478	-1.495	0.0229	ADIPOQ,AGTR2,FOS,MYOG,NOS1
lactacystin		chemical - protease inhibitor	Activated	2.757	2.782	0.0231	APP,ASNS,ATF3,CDKN1A,HIF1A,HLA-A,MMP2,NOS1,SLC3A2
DSCAM		other		0	0.03	0.0234	CEBPA,GRIN3B,NOS1,ROBO2,SNCAIP,TAC1
ALOX12	1.121	enzyme				0.0238	JUN,MMP2
CERS2	0.209	transcription regulator				0.0238	CDKN1A,CERS4
CLEC1B	-1.533	transmembrane receptor				0.0238	SPP1,TNC
CST3	0.288	other				0.0238	APP,FOS
DLK1	-1.272	other				0.0238	PPARG,SOX9
FFAR4	-2.98	g-protein coupled receptor				0.0238	GPT,LEP
GFPT1	0.736	enzyme				0.0238	LEP,PPARG
GPC1	1.262	transmembrane receptor				0.0238	MYOG,SOX17
HDAC8	0.012	transcription regulator				0.0238	CDKN1A,HOXA5
HPX		transporter				0.0238	COL2A1,SOX9
HSPA1A/HSPA1B	-0.316	enzyme				0.0238	CDKN1A,FOS
ITGA3	-1.159	other				0.0238	MMP2,SERPINE1
L-serine		chemical - endogenous mammalian				0.0238	CDKN1A,PCK2
L1CAM	-0.329	other				0.0238	LGR5,MMP2
LAMTOR1	-0.241	other				0.0238	FASN,SCD
LINC01139		other				0.0238	EGR1,SLC16A3
LMO4	-0.108	transcription regulator				0.0238	HP,PPARG
MED14	0.503	transcription regulator				0.0238	CIDEC,FABP4
MYF6	2.637	transcription regulator				0.0238	CDKN1A,MYOG
NCKAP1L	0.613	other				0.0238	Ank2,TMOD1
NPY1R	-1.805	g-protein coupled receptor				0.0238	FOS,LEP
PIAS2	0.441	transcription regulator				0.0238	CDKN1A,FOS
PTGER1	0.114	g-protein coupled receptor				0.0238	EGR2,FOS
PTN	0.645	growth factor				0.0238	COL9A1,SOX9
RANBP9	-0.073	other				0.0238	FOS,JUN
RMRP	-2.596	other				0.0238	COL2A1,SOX9
SELE	-1.503	transmembrane receptor				0.0238	FOS,GPT
STMN1	-0.437	other				0.0238	EGR1,TUBA1B
TCF/LEF		group				0.0238	JUN,MMP2
UGDH	0.431	enzyme				0.0238	LIPG,TNC
VLDLR	1.623	transporter				0.0238	FOS,SERPINE1
WWC1	1.071	transcription regulator				0.0238	CCN2,FGF1
acriflavine		chemical toxicant				0.0238	ADIPOQ,CD274
canrenoate potassium		chemical drug				0.0238	CDKN1A,SPP1
cetuximab		biologic drug				0.0238	HIF1A,PLAUR
digoxin		chemical drug				0.0238	FASN,HIF1A
farglitazar		chemical drug				0.0238	ADIPOQ,FABP4
hydroquinone		chemical - endogenous mammalian				0.0238	FOS,JUN
hyperforin		chemical drug				0.0238	SPP1,TNFRSF11B
pentylenetetrazol		chemical drug				0.0238	FOS,JUN
prostaglandin		chemical drug				0.0238	HAPLN1,HSD11B1
theophylline		chemical drug				0.0238	FOS,LGALS12
trypsin		group				0.0238	CDKN1A,FOS
urea		chemical - endogenous mammalian				0.0238	CYP2E1,EGR1
CAT	-1.36	enzyme		-1.702	-1.723	0.0242	CDKN1A,HIF1A,SERPINE1,TNC
HNRNPK	0.171	transcription regulator				0.0242	CCN2,CDKN1A,PPARG,VCAN
PNPT1	-0.17	enzyme				0.0242	CDKN1A,GBP6,Tgtp1/Tgtp2,Trim30a/Trim30d
salicylic acid		chemical drug		-0.293	-0.316	0.0242	CCN2,CYP2E1,FGF21,GDF15
CpG oligonucleotide		chemical drug		-0.928	-0.888	0.0243	C2,CD274,EGR1,GBP6,MCM6,SERPINE1,Trim30a/Trim30d
(3E)-1-[(1S)-1-(4-fluorophenyl)ethyl]-3-[[3-methoxy-4-(4-methylimidazol-1-yl)phenyl]methylidene]piperidin-2-one		chemical reagent				0.0246	APP
(5Z,13E)-11alpha-hydroxy-9,15-dioxoprost-13-enoic acid		chemical - endogenous mammalian				0.0246	FABP4
(R)-5-(2-azetidnylmethoxy)-2-chloropyridine		chemical drug				0.0246	FOS
(R)-PFI-2		chemical reagent				0.0246	CCN2
(des-Arg10,Leu9)-kallidin		chemical reagent				0.0246	CCN2
1,1,1-trichloroethane		chemical toxicant				0.0246	CYP2E1
2,3',4,4',5-pentachlorobiphenyl		chemical toxicant				0.0246	CLDN5
2,4-dichlorobenzamil		chemical reagent				0.0246	CCN2
2-((4-(2-hydroxypropan2-yl)phenyl)amino)-1H-benzo[d]imidazole-6-carbonitrile		chemical - kinase inhibitor				0.0246	APP
2-methoxy-5-(2',3',4'-trimethoxyphenyl)-2,4,6-cycloheptatrien-1-one		chemical reagent				0.0246	JUN
20-hydroxyprostaglandin E2		chemical - endogenous mammalian				0.0246	PPARG
24-methylenecycloartanyl ferulate		chemical reagent				0.0246	PPARG
3-deoxyglucosone		chemical - endogenous mammalian				0.0246	HBEGF
4-hydroxybutanoic acid		chemical drug				0.0246	APP
4-vinylcyclohexene		chemical reagent				0.0246	CYP2E1
7-bromoindirubin-3'-oxime		chemical - kinase inhibitor				0.0246	CDKN1A
9-hydroxy-(S)-10,12-octadecadienoic acid		chemical - endogenous mammalian				0.0246	SERPINE1
ABCA2	-0.046	transporter				0.0246	APP
ACSS1	-0.137	enzyme				0.0246	LEP
ACVR2B	-0.514	kinase				0.0246	CDKN1A
ADAM19	-0.013	peptidase				0.0246	EGR2
ADAMTS7	-0.229	peptidase				0.0246	SOX9
AGL	1.505	enzyme				0.0246	GPT
ALAS1	-1.561	enzyme				0.0246	FGF21
ANKS1A	-0.632	other				0.0246	FOS
APBA2	0.636	transporter				0.0246	APP
ARCN1	0.554	other				0.0246	APP
ARF3	0.012	enzyme				0.0246	APP
ARFRP1	-0.367	enzyme				0.0246	LIPE
ARHGEF17	0.078	other				0.0246	FOS
ARMC10	0.032	other				0.0246	CDKN1A
AZD1480		chemical drug				0.0246	TF
Ac-DEVD-CHO		chemical reagent				0.0246	FOS
Apoc3	-6.563	transporter				0.0246	LEP
BACE2	0.219	peptidase				0.0246	APP
BB 3103		chemical toxicant				0.0246	PRNP
BORCS8-MEF2B		transcription regulator				0.0246	JUN
BPNT1	-0.024	phosphatase				0.0246	GPT
BRL 26830		chemical drug				0.0246	ADRB3
BTA-EG4		chemical reagent				0.0246	APP
CABLES1	-0.468	other				0.0246	CDKN1A
CALHM1		ion channel				0.0246	APP
CALU	0.83	other				0.0246	GDF15
CCNI	0.09	other				0.0246	CDKN1A
CDT1	0.214	other				0.0246	CDKN1A
CHF 5074		chemical drug				0.0246	APP
CHRM2	-0.522	g-protein coupled receptor				0.0246	EGR1
CITED4	0.195	transcription regulator				0.0246	HIF1A
CKAP4	0.473	other				0.0246	CCN2
CLN5	0.618	other				0.0246	APP
CML advanced glycation end products		chemical reagent				0.0246	EGR1
CMTM4	0.498	cytokine				0.0246	CD274
CMTM6	-0.567	cytokine				0.0246	CD274
CNGA2		ion channel				0.0246	CYP26B1
CNTNAP1	-0.463	other				0.0246	APP
CORO2A	0	other				0.0246	DIO1
CRANAD-17		chemical reagent				0.0246	APP
CRB2	-0.724	other				0.0246	APP
CS-1		chemical reagent				0.0246	APP
CTOP		chemical reagent				0.0246	FOS
CUL9	-0.3	other				0.0246	CDKN1A
CV 6209		chemical reagent				0.0246	PRNP
CXXC1	-0.167	transcription regulator				0.0246	CDKN1A
Cbr2	-0.676	enzyme				0.0246	FABP4
Cop9 Signalosome		complex				0.0246	JUN
Cyp2j9	-1.132	enzyme				0.0246	ADIPOQ
D-glucosaminylphosphatidylinositol		chemical - endogenous mammalian				0.0246	PRNP
DDX43		enzyme				0.0246	H19
DEFB104A/DEFB104B		other				0.0246	TAC1
DHX8	0.317	enzyme				0.0246	CDKN1A
DNASE1L3		enzyme				0.0246	CDKN1A
DTX2	-1.074	other				0.0246	MYOG
DYNLRB1	-0.203	other				0.0246	SERPINE1
E. coli 0111:B4 peptidoglycan		chemical - endogenous non-mammalian				0.0246	DBI
EBF4	-0.303	transcription regulator				0.0246	CDKN1A
ECE		group				0.0246	APP
ECE2	1.172	peptidase				0.0246	APP
EG443		chemical reagent				0.0246	APP
ELAC2	0.247	enzyme				0.0246	CDKN1A
ENTPD7	0.358	enzyme				0.0246	APP
EPGN		growth factor				0.0246	FOS
EXOSC10	0.006	kinase				0.0246	FOS
EYA2	-0.385	phosphatase				0.0246	MYOG
EYA3	0.044	phosphatase				0.0246	MYOG
FANK1		transcription regulator				0.0246	JUN
FBXL2	0.744	enzyme				0.0246	APP
FBXL20	0.151	other				0.0246	APP
FGF14	0.03	growth factor				0.0246	FOS
FKBP10	0.665	enzyme				0.0246	PRNP
FKBPL	-0.679	other				0.0246	CDKN1A
FMOD	0.225	other				0.0246	LUM
FRZB	4.95	other				0.0246	COL2A1
FXYD1	-0.282	ion channel				0.0246	CDKN1A
FZD4	-1.419	g-protein coupled receptor				0.0246	PLVAP
Flt1		kinase				0.0246	ATF3
G protein alpha		group				0.0246	FOS
G-Actin		group				0.0246	JUN
GAD1	1.12	enzyme				0.0246	FOS
GDF1		growth factor				0.0246	SOX17
GDF10	-0.183	growth factor				0.0246	SERPINE1
GKN1		growth factor				0.0246	SOX9
GNF351		chemical reagent				0.0246	FGF21
GNG3	0.376	enzyme				0.0246	LEP
GPHA2		other				0.0246	FOS
GPHB5		other				0.0246	FOS
GRIA3	-0.227	ion channel				0.0246	LEP
GSAP	0.41	peptidase				0.0246	APP
GSK 189254		chemical drug				0.0246	FOS
GYKI 52466		chemical drug				0.0246	FOS
Gsta4	-1.044	enzyme				0.0246	GPT
HCG11		other				0.0246	CDKN1A
HLTF	0.048	transcription regulator				0.0246	SERPINE1
HM13	-0.148	peptidase				0.0246	APP
HMOX2	-0.057	enzyme				0.0246	ADIPOQ
HTR1A		g-protein coupled receptor				0.0246	NOS1
Hmgn2 (includes others)	-0.288	other				0.0246	SOX9
Hspa1b	-0.016	other				0.0246	FOS
IC261		chemical - kinase inhibitor				0.0246	APP
IFITM3	-0.893	other				0.0246	SPP1
ING3	0.268	other				0.0246	CDKN1A
ITM2C	0.459	other				0.0246	APP
Integrin alpha 3 beta 1		complex				0.0246	MMP2
JADE1	-0.003	transcription regulator				0.0246	CDKN1A
JIP1/2/3		group				0.0246	APP
KC7F2 compound		chemical reagent				0.0246	HIF1A
KIFAP3	0.129	other				0.0246	FOS
KLC1	0.25	other				0.0246	APP
KLRC1		transmembrane receptor				0.0246	GPT
KMT5A	-0.536	enzyme				0.0246	RUNX1
KRP-297		chemical drug				0.0246	FABP4
L 733060		chemical reagent				0.0246	FOS
LINC00475		other				0.0246	CDKN1A
LY 354740		chemical drug				0.0246	FOS
LY2811376		chemical drug				0.0246	APP
Ly6a (includes others)	-0.489	other				0.0246	APP
MC55w10		chemical reagent				0.0246	APP
MC55w21		chemical reagent				0.0246	APP
MC622		chemical reagent				0.0246	APP
MIR499B		microrna				0.0246	HIF1A
MKKS	-0.01	other				0.0246	LEP
MOB4	0.06	other				0.0246	CCN2
MRGPRX1		g-protein coupled receptor				0.0246	EGR1
MT-ND2	-1.469	enzyme				0.0246	HIF1A
MW-III-36C		chemical - protease inhibitor				0.0246	APP
MYL9	-1.35	other				0.0246	HIF1A
Mir690		microrna				0.0246	CEBPA
Myosin2		complex				0.0246	PPARG
N(6)-carboxymethyl-L-lysine		chemical - endogenous mammalian				0.0246	CCN2
N6-methyl-(R)-roscovitine		chemical reagent				0.0246	APP
NECAB3	-1.644	other				0.0246	APP
NGB	-2.616	transporter				0.0246	APP
NNZ 2566		biologic drug				0.0246	ATF3
NPC 15437		chemical - kinase inhibitor				0.0246	FOS
NPVF		other				0.0246	FOS
NSC 126405		chemical reagent				0.0246	CDKN1A
NUMB/NUMBL		group				0.0246	MSTN
Nectin		group				0.0246	MYOG
ONO-8711		chemical drug				0.0246	FOS
OSU8-1		chemical - protease inhibitor				0.0246	HBEGF
PAFAH2	0.005	enzyme				0.0246	GPT
PAK3	0.272	kinase				0.0246	APP
PCLAF	0.066	other				0.0246	CDKN1A
PD173955		chemical - kinase inhibitor				0.0246	PLAUR
PEX2	0.184	other				0.0246	CDKN1A
PGAM1	0.354	phosphatase				0.0246	CDKN1A
PI4K2A	-0.079	kinase				0.0246	HIF1A
PICALM	-0.022	other				0.0246	APP
PK 11195		chemical drug				0.0246	APP
PKR dimer		complex				0.0246	ATF3
PLEKHO1	-0.972	other				0.0246	MYOG
PLSCR3	-0.327	enzyme				0.0246	LEP
PLXNB1	-0.07	transmembrane receptor				0.0246	KLK3
PNRC2	0.016	other				0.0246	LEP
PPP2R2D	-0.355	other				0.0246	PPARG
PPY		other				0.0246	FOS
PRCC	-0.085	other				0.0246	SERPINE1
PRLHR		g-protein coupled receptor				0.0246	LEP
PRSS27	-2.832	peptidase				0.0246	GPT
PTGR2	-0.238	enzyme				0.0246	FABP4
PTPN9	0.421	phosphatase				0.0246	MMP2
QPCT	-0.657	enzyme				0.0246	APP
RAB5B	0.058	enzyme				0.0246	FOS
RDR03027		chemical reagent				0.0246	FGF21
RER1	0.008	other				0.0246	APP
RGS9BP		other				0.0246	RGS9
RNF139	0.189	enzyme				0.0246	FASN
RNF14	0.187	transcription regulator				0.0246	KLK3
RNF7	-0.131	enzyme				0.0246	JUN
RS86		chemical reagent				0.0246	APP
RTN1	0.533	other				0.0246	APP
S(-)-carbidopa		chemical drug				0.0246	FOS
S100A14		other				0.0246	MMP2
SART3	-0.168	other				0.0246	KLK3
SCML2		transcription regulator				0.0246	CDKN1A
SCN1B	0.632	ion channel				0.0246	FOS
SCN7A	-1.926	ion channel				0.0246	FOS
SHC3	1.54	kinase				0.0246	APP
SIX2	1.339	transcription regulator				0.0246	MYOG
SKI-190986		chemical reagent				0.0246	APP
SKI-213271		chemical reagent				0.0246	APP
SLC11A2	0.059	transporter				0.0246	APP
SLC1A2	1.004	transporter				0.0246	FOS
SLC26A1	-0.873	transporter				0.0246	GPT
SNORD21		other				0.0246	HLA-A
SPOCK1	0.768	other				0.0246	MMP2
SPON1	-1.774	other				0.0246	APP
SRF-ELK1		complex				0.0246	FOS
SRXN1	0.738	enzyme				0.0246	GPT
STMN2	-0.153	other				0.0246	APP
SYNJ1	0.275	phosphatase				0.0246	APP
Scd2	0.138	enzyme				0.0246	PPARG
Stat1-Stat3		complex				0.0246	FOS
TAX1BP3	-0.358	transcription regulator				0.0246	FOS
TBPL2		transcription regulator				0.0246	MYOG
TDP-665759		chemical reagent				0.0246	CDKN1A
TRPM3	0.075	ion channel				0.0246	EGR1
TYSND1	-0.803	peptidase				0.0246	GPT
Testosterone-AR dimer		complex				0.0246	KLK3
Til1		other				0.0246	SPP1
UBE2E1	0.575	enzyme				0.0246	CDKN1A
UCP3	-0.318	transporter				0.0246	LEP
UDP-N-acetylglucosamine		chemical - endogenous mammalian				0.0246	LEP
UVI3003		chemical reagent				0.0246	MYOG
WASF1	0.582	other				0.0246	APP
Z-IL-CHO		chemical - protease inhibitor				0.0246	APP
ZBTB5	-0.005	transcription regulator				0.0246	CDKN1A
ZBTB7C	0.521	transcription regulator				0.0246	CDKN1A
ZBTB8A	-0.014	other				0.0246	CDKN1A
ZDHHC21	0.597	enzyme				0.0246	APP
ZNF197		transcription regulator				0.0246	HIF1A
Zfp54	-0.399	other				0.0246	PPARG
Zfp55		other				0.0246	PPARG
acetylcholinesterase inhibitor		chemical drug				0.0246	APP
aleplasinin		chemical drug				0.0246	APP
anthocyanins		chemical drug				0.0246	LEP
anti-miR-142 inhibitor		chemical reagent				0.0246	CD274
anti-miR-221 inhibitor		chemical reagent				0.0246	CCN2
anti-miR-222 inhibitor		chemical reagent				0.0246	CCN2
arachidonyl-2-chloroethylamide		chemical reagent				0.0246	EGR1
arsenic trichloride		chemical reagent				0.0246	GADD45A
artemether		chemical drug				0.0246	MMP2
astaxanthin		chemical drug				0.0246	LEP
bapineuzumab		biologic drug				0.0246	APP
beta adrenergic receptor agonist		chemical drug				0.0246	LEP
beta-escin		chemical reagent				0.0246	CDKN1A
beta-tocopherol		chemical - endogenous mammalian				0.0246	CCN2
black cohosh extract		chemical drug				0.0246	SERPINE1
budesonide/formoterol		chemical drug				0.0246	CD274
cabazitaxel		chemical drug				0.0246	KLK3
cabozantinib		chemical drug				0.0246	CD274
camphene		chemical - endogenous non-mammalian				0.0246	ADIPOQ
ceritinib		chemical drug				0.0246	CD274
chartreusin		chemical reagent				0.0246	CDKN1A
chlorhexidine		chemical drug				0.0246	LEP
cilengitide		biologic drug				0.0246	CD274
cis-vaccenic acid		chemical - endogenous mammalian				0.0246	PNPLA2
clusterin antisense oligonucleotide		biologic drug				0.0246	KLK3
cyclothiazide		chemical drug				0.0246	EGR1
cytarabine/filgrastim/fludarabine phosphate		biologic drug				0.0246	FOS
cytarabine/idarubicin		chemical drug				0.0246	CEBPA
diflunisal		chemical drug				0.0246	APP
diisopropanolnitrosamine		chemical toxicant				0.0246	CDKN1A
[truncated: 654 more rows]
